# Supplementary material for: Human transcription factor protein interaction networks
Source: Research Square preprint supplement (doi:10.21203/rs.3.rs-228624/v1), 2021-02-23
Supplement: Supplementary file 1 [file 016e5bb30d23a882d1d3baa0.xlsx]

## Sheet: ALL TFs_BioID
Category	Term	Count	%	PValue	Genes	List Total	Pop Hits	Pop Total	Fold Enrichment	Bonferroni	Benjamini	FDR
GOTERM_BP_DIRECT	GO:0006351~transcription, DNA-templated	388	33.9458	6.09233e-104	P27540, P0C1Z6, Q9ULG1, Q99417, Q92925, P85037, Q6VMQ6, Q8IVH2, P55197, Q8IYH5, Q6STE5, Q02086, Q92922, Q13568, Q9Y4A5, Q9P2D1, O14593, O75362, Q8NF64, O15226, Q9UFF9, Q02078, Q01201, P52630, Q6MZP7, Q8WXI9, P12755, Q9NP66, Q9UBW7, Q9H8M2, O15090, Q96PN7, P37231, Q6PJG2, Q8IWI9, O15347, Q8TAQ2, Q5BKZ1, Q8TAQ5, Q13330, A8MTY0, P13056, P26583, P40763, Q76L83, Q9BQ87, O75151, Q9Y5A6, Q9C005, Q9Y4E5,…	1085	1955	16792	3.07155	2.00133e-100	2.00133e-100	1.10812e-100
GOTERM_BP_DIRECT	GO:0045944~positive regulation of transcription from RNA polymerase II promoter	231	20.21	2.52534e-72	P27540, Q9ULG1, Q06546, Q13573, P78545, Q9UKT9, P55197, Q8IZX4, P55317, Q92922, P52952, Q13568, P31260, O14593, Q9P2D1, Q14814, Q8NF64, Q00059, O60907, P46937, Q9Y692, Q13952, O43474, Q02078, Q01201, Q01543, O60216, Q9UQL6, Q04206, O60315, O00712, Q02962, Q16594, Q8IVW6, P12755, Q92908, Q15596, Q9UKV8, Q9NP62, Q15306, Q92793, P20823, Q9UKW6, P01106, Q06945, P37231, P01100, Q99856, P26367, P10071,…	1085	981	16792	3.64431	8.29574e-69	4.14787e-69	4.59327e-69
GOTERM_BP_DIRECT	GO:0000122~negative regulation of transcription from RNA polymerase II promoter	184	16.098	1.33969e-62	Q96BD5, P51531, P36402, P54259, Q06546, Q13573, Q9UPN9, Q08117, Q6VMQ6, P15976, Q12830, Q9ULM3, Q96RK0, P51532, P10412, P56545, A5YKK6, P35251, Q9BRR0, P55317, P49711, P52952, Q9UKL0, P62263, Q99496, P06400, Q01094, Q6W2J9, Q2M1V0, Q9H1B7, P15822, P22626, Q9Y2K1, O75362, Q8N488, O60907, P39880, P35680, P17844, Q5VWG9, O75626, Q8IX15, Q02078, O43474, Q15911, Q01201, Q9UQL6, Q04206, O60315, O00712,…	1085	720	16792	3.9551	4.40087e-59	1.46696e-59	2.43672e-59
GOTERM_BP_DIRECT	GO:0045893~positive regulation of transcription, DNA-templated	142	12.4234	4.17283e-52	Q12906, P51531, P27540, P85037, P15976, Q6VMQ6, Q12830, Q99717, Q9H7Z6, P51532, P78545, Q9Y6Q9, O00287, P61457, Q8IZX4, Q6STE5, P35251, Q9BRR0, P49711, Q92922, Q99607, P52952, Q14CW9, P06400, Q01094, Q00059, O60907, P35680, P20248, Q99729, Q9NVC6, O43474, Q15911, P41970, Q04206, Q15723, P28370, Q02962, O00716, Q9UIU6, Q9UPT9, Q03112, Q92908, P12956, P54132, Q15306, Q9UPP1, Q9H0N5, Q92793, Q92804,…	1085	515	16792	4.26731	1.37077e-48	3.42693e-49	7.58983e-49
GOTERM_BP_DIRECT	GO:0006366~transcription from RNA polymerase II promoter	139	12.161	5.55367e-50	Q06546, P15976, Q9UKT9, P78545, Q96AE4, Q8IZX4, P61244, P55317, P49711, Q99607, P52952, P31260, P61968, Q14814, P15822, Q00059, Q5VWG9, Q9Y692, Q13952, O43474, Q02078, Q15911, P41970, Q01543, O60216, Q04206, O00712, Q13148, Q02962, Q16594, P38159, Q9UIU6, Q03111, Q8IVW6, Q9Y603, Q12857, Q92908, O75478, O75376, Q9NP62, Q15306, P20823, P15172, O00268, Q9UKW6, P01106, Q06945, P01100, Q99856, P43694,…	1085	513	16792	4.19344	1.82438e-46	3.64876e-47	1.01014e-46
GOTERM_BP_DIRECT	GO:0006355~regulation of transcription, DNA-templated	246	21.5223	2.1888e-45	Q96BD5, P0C1Z6, Q7Z589, Q99417, Q9ULM3, Q9H7Z6, Q8IYH5, Q15072, P31260, Q9Y4A5, Q9P2D1, O75362, Q01844, P55198, Q13952, Q9UFF9, Q02078, Q8N1G0, Q9H2Z4, P67775, Q6MZP7, Q02962, Q9NP66, Q8IU81, Q9NZN8, Q15596, Q9NP62, Q92793, Q9H8M2, Q86UP3, Q9Y5V3, P01106, Q06945, Q8IWI9, O15347, Q01826, P26367, P43694, Q92785, Q92784, Q9ULJ3, Q92782, Q8TAQ5, P35711, O60925, O75486, Q13330, P35712, A8MTY0, P13056,…	1085	1504	16792	2.5314	7.19019e-42	1.19837e-42	3.98114e-42
GOTERM_BP_DIRECT	GO:0006357~regulation of transcription from RNA polymerase II promoter	118	10.3237	1.15063e-41	P51531, P25440, P36402, Q92925, Q13573, P85037, P51532, Q8IVH2, Q9UKT9, P78545, Q8IZX4, Q6STE5, Q02086, Q92922, P52952, Q13568, O14593, P06400, Q5SVZ6, Q5VZL5, Q12824, Q8TDD2, Q9Y6J9, P17844, P39880, Q9Y692, Q96BN2, Q13952, Q9NVC6, Q2KHR2, Q01201, Q01543, P52630, O60216, Q15723, Q9H334, Q9NV56, O75478, Q9NZN8, Q96GM5, Q9UBW7, P20823, Q52LR7, P15172, O00268, Q96PN7, Q9Y5V3, Q9UKW6, Q6PJG2, P01100,…	1085	441	16792	4.1411	3.7798e-38	5.39972e-39	2.09284e-38
GOTERM_BP_DIRECT	GO:0045892~negative regulation of transcription, DNA-templated	120	10.4987	2.24826e-37	Q12906, P54253, P51531, Q9UPN9, Q13573, Q08117, P85037, Q3T8J9, Q6VMQ6, Q9ULM3, P51532, Q9H7Z6, P78545, P56545, Q9H7S9, Q9BRR0, P49711, P52952, Q9UKL0, P06400, Q01094, Q6W2J9, O75362, O15226, Q96JB3, O43474, Q15911, P41970, Q9UQL6, Q04206, Q15723, Q02962, Q9H334, Q9UIU6, Q03112, P80723, Q92908, Q8WW38, Q96RE7, P12956, Q6NUN9, O15409, O43829, P35232, Q9Y5V3, Q13118, P37231, P63279, P10071, Q8TAQ2,…	1085	499	16792	3.7218	7.38555e-34	9.23193e-35	4.0893e-34
GOTERM_BP_DIRECT	GO:0006338~chromatin remodeling	47	4.11199	3.03374e-32	P51531, Q9ULG1, Q92925, O75478, P11387, Q96GM5, Q8NFD5, Q9Y230, Q12830, P51532, Q6PI98, P20823, Q6STE5, Q86U86, P48436, P55317, Q92922, P01106, Q9H981, Q9P2D1, P06400, P23759, Q9GZN1, Q01826, Q15014, Q9UPW6, Q12824, Q8TAQ2, Q9Y2K1, P46100, Q9Y6J9, Q92830, Q9NPF5, O60264, O96019, Q92831, Q9C086, P03372, Q9UBU8, P23771, Q86TJ2, Q9UQL6, Q969G3, P10242, P28370, O14497, Q9P2R6	1085	86	16792	8.45809	9.96583e-29	1.10731e-29	5.51798e-29
GOTERM_BP_DIRECT	GO:0016569~covalent chromatin modification	45	3.93701	1.10301e-23	P25440, Q05BQ5, Q7Z589, Q5H9F3, Q9HCK8, Q9NPG3, Q9NP66, Q68CP9, Q9Y294, Q92925, Q14781, P54198, O75177, O75376, Q96GM5, Q8NFD5, Q12830, Q9H8M2, P51532, Q8TD26, Q6STE5, Q96JM7, Q86U86, Q8IXM2, P55317, Q8N9N5, Q92922, P49711, Q15906, Q9P2D1, P06400, Q9UPW6, Q12824, Q8TAQ2, Q92784, P46100, Q9H160, Q969R5, O60264, Q9NXR8, Q969G3, Q9Y6J0, Q9UK53, P28370, O14497	1085	113	16792	6.16321	3.62338e-20	3.62338e-21	2.00623e-20
GOTERM_BP_DIRECT	GO:0016575~histone deacetylation	23	2.01225	9.49538e-15	Q96EB6, Q96BD5, Q12873, Q15014, Q9BQ87, Q96ST3, Q9HCU9, O60907, Q13330, Q5PSV4, O60341, Q96PK6, Q4LE39, P35232, Q9H7L9, Q9UBU8, Q9UQL6, Q9P0W2, Q9BTC8, Q9NSC2, Q9BZK7, P29374, O75182	1085	46	16792	7.73825	3.13649e-11	2.85139e-12	1.73639e-11
GOTERM_BP_DIRECT	GO:0043967~histone H4 acetylation	19	1.66229	3.05887e-14	Q9UPT9, O95619, Q15014, Q09472, O75528, Q15306, Q9Y230, Q9NPF5, Q5T5X7, O96019, Q9H0E9, Q9NXR8, Q15788, P15172, Q9UBU8, Q9H2F5, Q8TDI0, Q96L91, Q9Y4A5	1085	31	16792	9.4856	1.00659e-10	8.38829e-12	5.57332e-11
GOTERM_BP_DIRECT	GO:0006364~rRNA processing	48	4.19948	7.1232e-14	Q9Y4W2, Q71UM5, P61513, Q9H6F5, Q9H0D6, P78316, Q9NXF1, P46779, Q8IY37, Q9Y2W2, P62753, Q14692, Q9Y2R4, Q14690, P63173, Q9UNX3, P62269, P62829, P47914, P62891, P62263, Q8TF46, P62851, Q9P2D1, Q96EB6, Q99848, P05386, P49207, Q9Y2X3, Q9BVJ6, Q9UKD2, O00567, Q96GA3, P22087, P83881, P08708, Q13601, Q9NY93, P62861, Q14684, Q9Y3B9, P61254, O75607, P18077, Q96GQ7, P40429, P26373, P62847	1085	214	16792	3.47136	2.34143e-10	1.80109e-11	1.29641e-10
GOTERM_BP_DIRECT	GO:0043966~histone H3 acetylation	21	1.83727	3.0728e-13	O75478, O94864, Q9Y6J9, O75528, Q9H8E8, Q92830, Q15306, O75486, O75529, Q96BN2, Q9ULM3, Q9HBM6, Q92831, Q12962, P15172, Q96ES7, Q16514, Q9H0E3, Q16594, P61964, Q9NS73	1085	43	16792	7.55829	1.00951e-09	7.2108e-11	5.58953e-10
GOTERM_BP_DIRECT	GO:0070125~mitochondrial translational elongation	28	2.44969	1.57963e-12	Q9Y2R9, O15235, Q9Y2R5, P82673, Q9HD33, P82675, P51398, Q96EY7, P82663, P82664, Q9Y676, P82912, P82914, Q96EL2, P49411, Q9Y2Q9, Q92665, Q92552, P82930, Q9Y3B7, Q9Y3D5, P82650, Q9Y3D3, P82932, P82933, Q9Y3D9, O60783, Q9BYN8	1085	85	16792	5.09814	5.18907e-09	3.45938e-10	2.87314e-09
GOTERM_BP_DIRECT	GO:0000398~mRNA splicing, via spliceosome	46	4.0245	4.72949e-12	P84103, O94913, Q9UBB9, Q13573, O95400, P14866, O95391, P31942, P14678, Q9BRX9, Q15717, Q92989, Q96IZ7, Q08211, Q86V81, Q8N684, O43390, P09012, O00148, Q9H307, Q96DF8, Q9Y3C6, Q9P2I0, P09651, Q86U42, Q13151, Q10570, P52272, P22626, P51991, Q96T58, P17844, Q8IY67, Q8IWZ8, P07910, Q9H2H8, Q9BXP5, P26599, P62316, P35637, O75400, P08621, P61326, Q8IX12, P38159, Q05048	1085	222	16792	3.20684	1.55362e-08	9.71013e-10	8.60224e-09
GOTERM_BP_DIRECT	GO:0006367~transcription initiation from RNA polymerase II promoter	37	3.2371	5.9077e-12	Q13573, P21675, Q06330, Q92793, Q9BTT4, Q12962, Q8IZX4, O00268, Q14686, P15884, P37231, Q6P1X5, Q92585, Q15542, P49848, P19793, Q99594, Q9NPJ6, Q96RN5, P49116, Q15562, P20226, P41235, Q5VWG9, P46937, O75448, Q9HBM6, Q92831, P28347, P13056, Q9NVC6, Q96G25, P03372, P56270, Q16514, Q16594, O00716	1085	152	16792	3.76731	1.94069e-08	1.14158e-09	1.07454e-08
GOTERM_BP_DIRECT	GO:1901796~regulation of signal transduction by p53 class mediator	33	2.88714	7.66992e-12	P19784, Q9NPI1, Q12873, P21675, P54132, O60934, P67870, Q9HAF1, Q12962, Q8IZX4, O00268, P38398, Q96KQ7, Q96KQ4, Q8N9N5, Q6P1X5, Q15542, P49848, Q09472, Q92878, Q9H2X6, P20226, Q5VWG9, Q92993, Q9ULW0, Q9HBM6, P04637, P0CG48, Q9H9B1, Q16514, O15164, Q16594, P29590	1085	124	16792	4.11875	2.51959e-08	1.39977e-09	1.39507e-08
GOTERM_BP_DIRECT	GO:0016925~protein sumoylation	32	2.79965	7.71445e-12	Q14781, P11387, P54132, O75030, Q9Y4E5, P38398, P61956, Q7Z3B4, Q9UQE7, P63279, Q99496, O75928, Q96HI0, Q12888, Q99567, Q9Y2X3, Q13330, Q14676, Q969R5, P52948, Q8NDX5, P63165, P04637, P37198, Q9H165, P07910, O60216, Q14683, Q06587, P35658, O75925, P29590	1085	117	16792	4.23289	2.53421e-08	1.3338e-09	1.40317e-08
GOTERM_BP_DIRECT	GO:0043044~ATP-dependent chromatin remodeling	15	1.31234	9.4931e-12	Q9UBB5, Q9HCK8, Q92925, Q8TAQ2, Q12824, P60709, O96019, O60264, P51532, P07910, Q969G3, Q92922, Q8WXI9, P28370, O14497	1085	23	16792	10.0934	3.11847e-08	1.55924e-09	1.72667e-08
GOTERM_BP_DIRECT	GO:0070126~mitochondrial translational termination	27	2.3622	1.4527e-11	Q9Y2R9, O15235, Q9Y2R5, P82673, Q9HD33, P82675, P51398, Q96EY7, P82663, P82664, Q9Y676, P82912, P82914, Q96EL2, Q9Y2Q9, Q92665, Q92552, P82930, Q9Y3B7, Q9Y3D5, P82650, P82932, Q9Y3D3, P82933, Q9Y3D9, O60783, Q9BYN8	1085	86	16792	4.8589	4.7721e-08	2.27243e-09	2.64226e-08
GOTERM_BP_DIRECT	GO:0006310~DNA recombination	26	2.27472	3.91885e-11	P0C1Z6, P12956, P54132, Q6ZW49, Q9Y230, Q06330, Q8NBZ0, Q9Y5K5, Q6PI98, Q96PK6, P38398, Q14686, Q9H981, O94762, O15347, Q92878, P46100, Q9H9F9, P13010, O96019, Q6P4R8, Q9BTK6, Q9C086, Q96EZ8, O60216, P09429	1085	83	16792	4.84806	1.28734e-07	5.85156e-09	7.12789e-08
GOTERM_BP_DIRECT	GO:0016573~histone acetylation	17	1.48731	5.95047e-11	Q15542, Q9NV56, O75478, P21675, Q15596, Q92793, Q92993, Q9H7Z6, O75448, Q9HAF1, P20823, Q9Y6Q9, Q52LR7, Q8IZX4, Q86TJ2, Q6ZRS2, Q9Y4A5	1085	34	16792	7.73825	1.95473e-07	8.49883e-09	1.08231e-07
GOTERM_BP_DIRECT	GO:0043968~histone H2A acetylation	12	1.04987	8.29429e-11	O95619, Q9UBU8, Q15014, Q9H2F5, Q96L91, Q9Y230, Q9NPF5, O96019, Q9NXR8, Q9H0E9, Q9HAF1, Q9Y4A5	1085	15	16792	12.3812	2.72467e-07	1.13528e-08	1.50862e-07
GOTERM_BP_DIRECT	GO:0000184~nuclear-transcribed mRNA catabolic process, nonsense-mediated decay	30	2.62467	3.24645e-10	Q9NPI6, P63151, P61513, P46779, P30153, Q9UPR3, P62753, P63173, Q9UNX3, P62269, P62829, Q92540, P47914, P62891, Q92900, P62263, P62851, P05386, P49207, Q8IZD4, P83881, P08708, P62861, P61254, P67775, P18077, P61326, P26373, P40429, P62847	1085	119	16792	3.90164	1.06646e-06	4.26584e-08	5.90488e-07
GOTERM_BP_DIRECT	GO:1904837~beta-catenin-TCF complex assembly	18	1.5748	4.40341e-10	Q9Y3Y4, O00512, Q9UBL3, P36402, Q09472, Q92793, Q92993, Q15291, P51532, Q86UU0, O14686, Q04726, Q04727, Q9BRQ0, Q04724, P01106, Q9Y4A5, Q9NQB0	1085	43	16792	6.47853	1.44652e-06	5.56354e-08	8.00923e-07
GOTERM_BP_DIRECT	GO:0006412~translation	46	4.0245	4.52506e-10	Q71UM5, P61513, Q9Y2R9, P46779, O15235, Q9UKV8, Q9Y2R5, P62753, Q969Q0, P63173, P82675, P05141, Q9UNX3, Q9Y676, P62269, P62829, P47914, Q9Y399, P62891, O00425, P62263, P62851, P82912, P82914, Q96EL2, P05386, P49207, P12236, P83881, P08708, Q9BZB8, P62861, Q15025, P61254, Q9Y3D5, Q9Y3B7, Q9Y3D3, P82932, P82933, O76021, P18077, Q9Y3D9, O60783, P40429, P26373, P62847	1085	253	16792	2.81391	1.48648e-06	5.50549e-08	8.23049e-07
GOTERM_BP_DIRECT	GO:0006281~DNA repair	43	3.76203	1.48173e-09	P0C1Z6, Q7Z589, Q71UM5, Q9ULG1, Q92889, Q9Y294, P54132, O95677, O60934, Q9Y230, Q9Y5K5, Q8NBZ0, Q8IY92, Q6PI98, Q9Y253, Q52LR7, Q96PK6, Q9BQI6, P38398, Q14686, Q9UQE7, Q92900, Q9H981, O94762, Q9Y4A5, Q96EB6, Q15014, Q12824, Q92878, Q9Y2K1, P46100, Q29RF7, Q9NPF5, Q8TEK3, O96019, Q6P4R8, Q9BTK6, P06748, P63165, Q9C086, Q96EZ8, Q14683, Q9NS91	1085	235	16792	2.83187	4.86746e-06	1.73838e-07	2.69507e-06
GOTERM_BP_DIRECT	GO:0016032~viral process	49	4.28696	4.11279e-09	Q9H6F5, Q9NPG3, Q13573, Q6VMQ6, P21796, Q14141, Q7Z3B4, Q9UKL0, P09651, P06400, Q92878, Q99567, P25963, Q96T58, Q92830, P20248, P06748, Q93009, P16220, Q92831, P04637, P28074, P10809, P63244, P25789, O75179, P21675, P11387, Q9Y5Z7, Q92793, P05141, O00268, Q6ZRS2, P63279, Q15542, Q96EB6, Q01826, Q09472, P63167, P20226, Q92993, P52948, P63165, P37198, Q15046, P08047, P35658, P40763, P53618	1085	299	16792	2.53628	1.35104e-05	4.65879e-07	7.48063e-06
GOTERM_BP_DIRECT	GO:0051568~histone H3-K4 methylation	12	1.04987	7.5511e-09	Q9C005, O15550, O14686, Q9UBL3, Q8NEZ4, Q6ZW49, Q9UMN6, Q15291, Q03164, P61964, O15047, Q9P0U4	1085	20	16792	9.2859	2.48051e-05	8.26845e-07	1.37345e-05
GOTERM_BP_DIRECT	GO:0006397~mRNA processing	35	3.06212	1.10678e-08	Q9UPN6, Q9H0D6, Q07666, Q9C0J8, Q9UBB9, Q5T481, P14866, Q9ULX6, Q14690, Q14498, Q9BWF3, Q32P51, Q92945, O43390, Q58A45, P09651, P98175, Q6I9Y2, Q13151, Q9NR56, Q8IX01, P22626, Q5BKZ1, Q99590, P49756, Q9P2N5, Q7Z6E9, Q96PU8, Q9BZB8, P26599, P57052, Q96E39, P08621, Q9NW13, Q13148	1085	179	16792	3.02613	3.63571e-05	1.17283e-06	2.01309e-05
GOTERM_BP_DIRECT	GO:0019083~viral transcription	26	2.27472	3.58224e-08	P61513, P05386, Q99567, P49207, P46779, P62753, P52948, P63173, P83881, P08708, P37198, Q9UNX3, P62861, P61254, P62269, P62829, P47914, Q7Z3B4, P62891, P18077, P62263, P35658, P40429, P26373, P62851, P62847	1085	112	16792	3.59276	0.00011767	3.67738e-06	6.51563e-05
GOTERM_BP_DIRECT	GO:0010501~RNA secondary structure unwinding	16	1.39983	4.98332e-08	Q9H2U1, Q9H9G7, Q9UL18, Q9H8H2, Q8TDD1, Q9UKV8, P17844, Q9Y2R4, Q92841, Q9NY93, O00148, Q9NVP1, Q9GZR7, Q9BQ39, Q13206, Q96GQ7	1085	44	16792	5.62782	0.000163689	4.96065e-06	9.06401e-05
GOTERM_BP_DIRECT	GO:0035019~somatic stem cell population maintenance	19	1.66229	9.01683e-08	Q86U70, P48431, P12755, O00512, Q06330, P46937, Q9Y6X8, O43474, Q86UU0, Q9UKW6, Q9HAZ2, Q9NSC2, P48436, Q06945, Q13118, P40424, Q15906, P40763, P23769	1085	65	16792	4.5239	0.000296159	8.71181e-06	0.000164004
GOTERM_BP_DIRECT	GO:0006614~SRP-dependent cotranslational protein targeting to membrane	23	2.01225	9.58926e-08	P61513, P05386, P49207, P46779, P62753, P63173, O76094, P83881, P08708, P62861, Q9UNX3, P61254, P62269, P62829, P47914, P18077, P62891, Q9UHB9, P62263, P62851, P26373, P40429, P62847	1085	94	16792	3.7868	0.000314958	9.00017e-06	0.000174416
GOTERM_BP_DIRECT	GO:0035278~miRNA mediated inhibition of translation	9	0.787402	1.15262e-07	Q9H9G7, Q9BWF3, Q9UL18, Q9UPQ9, Q8NDV7, Q9HCJ0, Q9UKV8, P56537, P40763	1085	12	16792	11.6074	0.000378563	1.05176e-05	0.000209646
GOTERM_BP_DIRECT	GO:0061014~positive regulation of mRNA catabolic process	9	0.787402	1.15262e-07	Q7Z2W4, A5YKK6, Q5TC82, Q9UIV1, O43390, Q92945, O00178, Q92900, Q9UFF9	1085	12	16792	11.6074	0.000378563	1.05176e-05	0.000209646
GOTERM_BP_DIRECT	GO:0043984~histone H4-K16 acetylation	11	0.96238	1.22801e-07	Q96EZ8, O15294, Q7Z3B3, Q9P2N6, Q9H9L4, Q68DK7, Q03164, P61964, Q9H7Z6, P51610, Q9HAF1	1085	20	16792	8.51207	0.000403321	1.09027e-05	0.000223359
GOTERM_BP_DIRECT	GO:0006306~DNA methylation	12	1.04987	1.48362e-07	Q96KQ7, Q9NRZ9, P46100, Q9H9B1, P49711, Q86YP4, Q9NPF5, Q6VMQ6, Q5T5X7, Q8WXI9, Q03164, P01100	1085	25	16792	7.42872	0.000487249	1.28254e-05	0.00026985
GOTERM_BP_DIRECT	GO:0032543~mitochondrial translation	14	1.22485	1.79938e-07	P82912, P82914, Q96EL2, Q9Y2R9, O15235, Q9Y2R5, Q9HD33, Q96EY7, Q9Y676, P82930, Q9Y3D5, Q9Y3D3, P82932, Q9Y399	1085	36	16792	6.01864	0.000590922	1.51562e-05	0.000327283
GOTERM_BP_DIRECT	GO:0008380~RNA splicing	31	2.71216	2.50499e-07	Q9UPN6, Q9UBB9, Q5T481, Q9Y2W2, P30153, Q9ULX6, P14678, P31942, Q14498, Q96IZ7, Q9BWF3, Q32P51, Q92945, P98175, Q6I9Y2, Q9NR56, Q8IX01, Q14966, Q5BKZ1, Q99590, P49756, Q96PU8, P07910, P26599, P62316, P67775, P57052, Q96E39, P08621, Q9NW13, Q13148	1085	166	16792	2.89019	0.000822552	2.0572e-05	0.000455625
GOTERM_BP_DIRECT	GO:0006337~nucleosome disassembly	10	0.874891	2.85583e-07	Q68CP9, Q6STE5, Q12824, Q8TAQ2, Q92925, Q969G3, Q92922, Q96GM5, O14497, P51532	1085	17	16792	9.10382	0.000937699	2.28812e-05	0.000519437
GOTERM_BP_DIRECT	GO:0040008~regulation of growth	16	1.39983	7.81524e-07	Q9NV56, O95619, Q15014, Q08117, P30153, Q9H160, Q9Y230, Q92993, Q9NPF5, Q5PSV4, O96019, Q9H0E9, Q9NXR8, Q9UBU8, Q9H2F5, P67775	1085	53	16792	4.67215	0.00256401	6.11245e-05	0.00142148
GOTERM_BP_DIRECT	GO:0035195~gene silencing by miRNA	8	0.699913	1.20192e-06	A5YKK6, Q8NDV7, Q9HCJ0, Q9UIV1, Q9UGP4, Q9HCE1, P56537, Q9UFF9	1085	11	16792	11.2556	0.00394054	9.18173e-05	0.00218612
GOTERM_BP_DIRECT	GO:0006977~DNA damage response, signal transduction by p53 class mediator resulting in cell cycle arrest	17	1.48731	1.32242e-06	O75175, Q01094, Q99856, Q09472, Q9UKZ1, Q9NZN8, P06748, Q9UFF9, P04637, Q9H9A5, A5YKK6, P0CG48, Q9UIV1, Q14186, Q92600, Q06945, P29590	1085	62	16792	4.24356	0.00433475	9.87262e-05	0.00240529
GOTERM_BP_DIRECT	GO:0006352~DNA-templated transcription, initiation	13	1.13736	1.44815e-06	Q15542, Q12962, P49848, O00268, Q14686, Q9Y6J9, P21675, Q16514, P20226, P15884, P01106, O60264, Q16594	1085	36	16792	5.58874	0.00474588	0.00010571	0.00263397
GOTERM_BP_DIRECT	GO:0006325~chromatin organization	14	1.22485	1.86346e-06	Q15542, Q96EB6, Q9Y4W2, P48431, Q01826, Q12873, Q9NP66, O15379, O60248, Q96JM2, Q9UQL6, Q9H9B1, P26583, Q9UK53	1085	43	16792	5.03886	0.00610277	0.000133067	0.00338934
GOTERM_BP_DIRECT	GO:0043981~histone H4-K5 acetylation	9	0.787402	2.37218e-06	Q96EZ8, O15294, Q7Z3B3, Q9P2N6, Q9H9L4, P61964, Q9H7Z6, P51610, Q9HAF1	1085	16	16792	8.70553	0.00776234	0.000165787	0.0043146
GOTERM_BP_DIRECT	GO:0043982~histone H4-K8 acetylation	9	0.787402	2.37218e-06	Q96EZ8, O15294, Q7Z3B3, Q9P2N6, Q9H9L4, P61964, Q9H7Z6, P51610, Q9HAF1	1085	16	16792	8.70553	0.00776234	0.000165787	0.0043146
GOTERM_BP_DIRECT	GO:0006396~RNA processing	21	1.83727	3.07023e-06	P54253, Q9H2U1, Q9H0D6, Q8IX01, Q9UBB9, P14866, Q8TDD1, Q9Y2W2, Q8IY37, Q7L2E3, Q92841, P31942, Q8IWZ8, P29558, Q14498, Q08211, Q9BWF3, Q8IX18, P78332, Q86U42, Q05048	1085	97	16792	3.35058	0.010035	0.000210097	0.00558421
GOTERM_BP_DIRECT	GO:0021983~pituitary gland development	11	0.96238	5.41763e-06	P48431, P26367, P10070, Q9UBR4, Q9NSC2, P14921, Q06330, P78337, O60341, P16220, P23769	1085	28	16792	6.08005	0.0176395	0.000363137	0.00985351
GOTERM_BP_DIRECT	GO:0044255~cellular lipid metabolic process	13	1.13736	6.76325e-06	P19793, Q9Y618, Q6STE5, Q96ST3, Q14686, O75376, Q9BZK7, O15379, Q15596, O60907, Q92793, O75182, Q15788	1085	41	16792	4.90718	0.0219724	0.000444248	0.0123008
GOTERM_BP_DIRECT	GO:0006413~translational initiation	25	2.18723	6.80235e-06	P61513, P05386, P49207, P46779, Q9UKV8, P62753, Q9Y262, P63173, P83881, P08708, Q9UNX3, P62861, P61254, O15372, P62269, P62829, P47914, P62891, P18077, P62263, P40429, P26373, P56537, P62851, P62847	1085	137	16792	2.82418	0.022098	0.000438057	0.0123719
GOTERM_BP_DIRECT	GO:0006369~termination of RNA polymerase II transcription	16	1.39983	1.02013e-05	P84103, Q6I9Y2, Q10570, O94913, O95391, P14678, Q9BY77, Q92989, P56270, Q86V81, Q8N684, O00148, P61326, Q9P2I0, Q86U42, Q05048	1085	64	16792	3.86912	0.0329561	0.000644242	0.0185532
GOTERM_BP_DIRECT	GO:0016578~histone deubiquitination	8	0.699913	1.05192e-05	Q9UPT9, Q12962, Q92830, O75486, A6NNY8, Q14CW9, O15265, Q9Y4A5	1085	14	16792	8.84371	0.0339654	0.000651781	0.0191313
GOTERM_BP_DIRECT	GO:0031124~mRNA 3'-end processing	14	1.22485	1.1841e-05	P84103, Q6I9Y2, Q10570, O94913, O95391, Q9BY77, Q92989, Q86V81, Q8N684, O00148, P61326, Q9P2I0, Q05048, Q86U42	1085	50	16792	4.33342	0.0381512	0.000720074	0.0215351
GOTERM_BP_DIRECT	GO:0051726~regulation of cell cycle	23	2.01225	1.31956e-05	P06400, Q99583, P10914, Q03112, Q9UQ88, Q96GY3, Q09472, Q9H2X6, Q8TEK3, P05412, Q13363, Q9H7S9, Q14671, Q5TKA1, Q6MZP7, P10244, P63244, P17535, Q13148, P35658, P40763, Q92560, Q9H869	1085	124	16792	2.87064	0.0424216	0.000787829	0.0239983
GOTERM_BP_DIRECT	GO:0034644~cellular response to UV	13	1.13736	1.50798e-05	P04637, Q9ULG1, Q92889, Q09472, Q9Y2K1, O75113, P21675, Q14934, Q9Y230, Q92793, P01106, P25490, O60341	1085	44	16792	4.5726	0.0483305	0.000884207	0.0274246
GOTERM_BP_DIRECT	GO:0051123~RNA polymerase II transcriptional preinitiation complex assembly	8	0.699913	1.86232e-05	Q8IZX4, O00268, P21675, Q16514, Q9UI36, Q6P1X5, Q16594, Q9HBM6	1085	15	16792	8.25413	0.0593441	0.00107272	0.0338678
GOTERM_BP_DIRECT	GO:0006260~DNA replication	26	2.27472	1.95517e-05	Q12857, P11387, P54132, O60934, Q8NBZ0, P20962, Q8IY92, Q9Y253, Q96PK6, P29558, P35251, P38398, Q14686, P08651, Q92900, O94762, Q96EB6, Q96ST3, Q92878, Q92993, P52948, Q7Z6E9, Q04837, Q14938, P55209, O00712	1085	155	16792	2.59606	0.0622089	0.00110677	0.0355561
GOTERM_BP_DIRECT	GO:0035194~posttranscriptional gene silencing by RNA	6	0.524934	2.09085e-05	Q9H9G7, Q9UL18, Q9UPQ9, Q8NDV7, Q9HCJ0, Q9UKV8	1085	7	16792	13.2656	0.0663793	0.00116348	0.0380229
GOTERM_BP_DIRECT	GO:0031065~positive regulation of histone deacetylation	7	0.612423	2.48841e-05	P04637, Q13363, Q6KC79, O43823, Q9H160, Q9ULX6, P29590	1085	11	16792	9.84868	0.0784934	0.00136149	0.0452513
GOTERM_BP_DIRECT	GO:0010467~gene expression	13	1.13736	3.91838e-05	Q13151, Q9Y6M1, P52272, P22626, P51991, P14866, Q9NZI8, P07910, P26599, O43390, O00425, P09651, P38159	1085	48	16792	4.19155	0.120781	0.00210796	0.0712462
GOTERM_BP_DIRECT	GO:0030521~androgen receptor signaling pathway	12	1.04987	4.03715e-05	P06400, Q9NVC6, Q9NPJ6, O75928, P38398, Q02790, Q92993, O14497, O75925, Q15788, O75448, Q9Y6Q9	1085	41	16792	4.52971	0.124205	0.0021368	0.0734051
GOTERM_BP_DIRECT	GO:0035518~histone H2A monoubiquitination	7	0.612423	4.7045e-05	Q6W2J9, Q9BSM1, Q8N488, P63208, Q06587, Q8NHM5, Q99496	1085	12	16792	9.02796	0.143196	0.00245011	0.0855342
GOTERM_BP_DIRECT	GO:0060261~positive regulation of transcription initiation from RNA polymerase II promoter	6	0.524934	5.27788e-05	Q02556, P21675, Q6ZW49, P52952, P35680, P20823	1085	8	16792	11.6074	0.159184	0.00270544	0.0959543
GOTERM_BP_DIRECT	GO:0017148~negative regulation of translation	14	1.22485	6.50109e-05	Q12906, O75175, Q9Y6M1, P04406, Q9NZN8, Q9NZI8, Q6Y7W6, A5YKK6, Q9NRA8, Q9BWF3, P63244, Q92600, O00425, P40429	1085	58	16792	3.73571	0.192303	0.00328027	0.11818
GOTERM_BP_DIRECT	GO:0006302~double-strand break repair	15	1.31234	6.56611e-05	Q9ULG1, Q9UIG0, Q92878, Q99504, Q9H9F9, O60934, P13010, Q13330, Q92993, Q96RL1, O60264, O95551, Q9Y4F3, O60216, P38398	1085	66	16792	3.51739	0.194026	0.0032629	0.119362
GOTERM_BP_DIRECT	GO:0009887~organ morphogenesis	18	1.5748	7.28263e-05	Q9Y603, Q09472, P26367, Q08117, Q9UHF7, P15976, P48742, Q12952, Q04726, P23771, Q01543, Q04724, Q9UBR4, Q04206, Q969G2, Q92922, P55771, P23769	1085	92	16792	3.02801	0.212777	0.00356443	0.132379
GOTERM_BP_DIRECT	GO:0009653~anatomical structure morphogenesis	18	1.5748	7.28263e-05	P23759, Q9Y6M1, P54198, Q99504, Q9NP62, O95677, P63167, Q05925, P48742, Q9UN79, O75398, P23771, Q06710, P78337, P50219, O00425, P56693, Q9UIU6	1085	92	16792	3.02801	0.212777	0.00356443	0.132379
GOTERM_BP_DIRECT	GO:0032481~positive regulation of type I interferon production	13	1.13736	7.46005e-05	Q9H2U1, P10914, Q7Z2W4, Q09472, P12956, P13010, Q92793, P19838, Q14653, Q08211, Q00653, P51617, Q04206	1085	51	16792	3.94499	0.217352	0.00359751	0.135602
GOTERM_BP_DIRECT	GO:0032508~DNA duplex unwinding	12	1.04987	8.19658e-05	Q9ULG1, Q9HCK8, Q08211, Q12873, Q92878, P12956, P46100, P54132, P13010, O60934, Q9Y230, O94762	1085	44	16792	4.22086	0.236062	0.00389484	0.14898
GOTERM_BP_DIRECT	GO:0033962~cytoplasmic mRNA processing body assembly	7	0.612423	8.25944e-05	Q99700, Q96F86, Q5TC82, Q9UIV1, Q86TB9, Q9UGP4, Q8ND56	1085	13	16792	8.3335	0.237638	0.0038687	0.150122
GOTERM_BP_DIRECT	GO:0007275~multicellular organism development	57	4.98688	0.000116206	Q9UPN4, Q86U70, Q08117, P31314, Q9Y314, P78545, Q15717, A5YKK6, Q04724, Q8N9N5, Q92766, Q9UGP4, P31260, Q5VZL5, P15822, Q8N488, P39880, Q9UI36, Q8ND56, Q8NDX5, Q93009, Q9BX40, P04637, Q12952, P17036, Q9H2Z4, O95365, P61962, Q02962, Q99583, Q13948, O95677, Q6ZTW0, Q9UMX1, P20719, Q96KR1, Q8NB78, Q9UBW7, O75030, O15090, Q96PN7, Q9UEE9, Q3ZCT1, Q06710, Q9UBR4, Q63HK5, O15347, P26367, Q92618, Q99504,…	1085	521	16792	1.69321	0.31734	0.00536244	0.211152
GOTERM_BP_DIRECT	GO:0043923~positive regulation by host of viral transcription	7	0.612423	0.000136651	P05412, Q09472, Q12824, Q13573, Q01664, P08047, P51532	1085	14	16792	7.73825	0.361688	0.00621572	0.248259
GOTERM_BP_DIRECT	GO:0006406~mRNA export from nucleus	18	1.5748	0.000211012	P84103, Q6I9Y2, Q10570, Q99567, P22626, O95391, Q9UPR3, P52948, Q9BY77, P37198, Q86V81, O00148, Q92540, Q7Z3B4, Q9P2I0, P61326, P35658, Q92900	1085	100	16792	2.78577	0.50005	0.00945158	0.383108
GOTERM_BP_DIRECT	GO:0080182~histone H3-K4 trimethylation	7	0.612423	0.000215336	P10412, O15294, P29374, Q6N021, Q9UMN6, Q5T5X7, Q03164	1085	15	16792	7.22237	0.507103	0.00951465	0.390944
GOTERM_BP_DIRECT	GO:0000470~maturation of LSU-rRNA	7	0.612423	0.000215336	O95478, Q9Y4W2, P46087, Q9NXF1, Q9Y3B9, O76021, P56537	1085	15	16792	7.22237	0.507103	0.00951465	0.390944
GOTERM_BP_DIRECT	GO:0060070~canonical Wnt signaling pathway	16	1.39983	0.000245692	O00512, Q9HCK8, P36402, P17482, O60907, O43474, O15550, Q86UU0, Q9BRQ0, Q9BZK7, O15178, P52952, Q06945, P01106, Q9H6I2, Q9NQB0	1085	83	16792	2.98342	0.553894	0.0107049	0.44594
GOTERM_BP_DIRECT	GO:0008285~negative regulation of cell proliferation	45	3.93701	0.000301029	Q99583, P37275, P10914, P51531, P12755, Q9NPI1, Q68CP9, P67870, Q06330, P15976, Q9BZE4, O14964, P56545, P35232, Q13363, Q86U86, Q96F45, Q9UIV1, Q13118, Q06945, Q92560, P98175, P06400, P49848, P10071, Q12824, P14921, P41235, Q9H160, Q01664, Q03164, Q9UFF9, P06748, Q92831, P04637, O43474, P05412, P37198, P23771, Q8TDI0, P41162, O15164, Q9UK53, P40763, P29590	1085	396	16792	1.75869	0.628062	0.0129292	0.546118
GOTERM_BP_DIRECT	GO:0042274~ribosomal small subunit biogenesis	7	0.612423	0.00032578	P08708, O75683, Q9H0A0, P78316, P62753, Q96GA3, P62847	1085	16	16792	6.77097	0.657115	0.0138046	0.590895
GOTERM_BP_DIRECT	GO:0007519~skeletal muscle tissue development	12	1.04987	0.000335875	P15172, Q06413, Q09472, Q7Z406, Q9Y281, P60660, O95425, O15409, O75182, Q9H334, P14649, Q9UIU6	1085	51	16792	3.64153	0.668303	0.0140483	0.609153
GOTERM_BP_DIRECT	GO:0001649~osteoblast differentiation	18	1.5748	0.00034175	Q14814, P48431, P54198, P10070, Q9Y294, Q8TDD2, Q9BZE4, P22087, P06576, Q08211, P07910, P35232, Q06413, Q86V81, P67936, Q00610, O76021, P38159	1085	104	16792	2.67862	0.674646	0.0141126	0.619777
GOTERM_BP_DIRECT	GO:0032206~positive regulation of telomere maintenance	6	0.524934	0.000369538	Q9H2U1, Q9BVP2, Q92878, P46100, O60934, P29590	1085	11	16792	8.44173	0.70304	0.0150624	0.670011
GOTERM_BP_DIRECT	GO:0048646~anatomical structure formation involved in morphogenesis	6	0.524934	0.000369538	P43694, P23771, P55317, P56179, Q9UHF7, P48742	1085	11	16792	8.44173	0.70304	0.0150624	0.670011
GOTERM_BP_DIRECT	GO:0000289~nuclear-transcribed mRNA poly(A) tail shortening	9	0.787402	0.000372045	Q9H9A5, O75175, A5YKK6, Q9UKZ1, Q9UIV1, Q9NZN8, Q92600, Q58A45, Q9UFF9	1085	29	16792	4.80305	0.705476	0.014978	0.674543
GOTERM_BP_DIRECT	GO:0001701~in utero embryonic development	26	2.27472	0.000425316	P19793, Q9NR56, Q9HCK8, Q92908, Q8WW38, P10071, Q9ULJ6, P10070, Q96ST3, Q06546, Q92830, P35712, P15976, O60341, P35579, Q7Z6E9, P35580, P09493, O15550, P23771, Q9BRQ0, P01106, Q12948, Q9H334, P56693, Q9P2D1	1085	187	16792	2.15181	0.752776	0.0168978	0.770774
GOTERM_BP_DIRECT	GO:0051571~positive regulation of histone H3-K4 methylation	7	0.612423	0.000476103	O15294, P38398, Q13573, Q6ZW49, P10242, Q03164, Q8WXX7	1085	17	16792	6.37268	0.79078	0.0186713	0.862435
GOTERM_BP_DIRECT	GO:0030048~actin filament-based movement	7	0.612423	0.000476103	Q9Y4I1, Q9UM54, P35580, Q7Z406, P68032, O43795, P35579	1085	17	16792	6.37268	0.79078	0.0186713	0.862435
GOTERM_BP_DIRECT	GO:0000086~G2/M transition of mitotic cell cycle	21	1.83727	0.000500971	Q9UPN4, Q8TEP8, P07437, O75665, P63151, Q71U36, Q07666, Q9H8E8, P63167, P61006, P30153, Q15154, Q9ULW0, O94986, P68371, P0DP24, P0CG48, Q8TCU4, P63208, Q9H6D7, Q6P1X5	1085	137	16792	2.37231	0.8072	0.0194057	0.907289
GOTERM_BP_DIRECT	GO:0009952~anterior/posterior pattern specification	15	1.31234	0.000550174	P10071, P10070, Q9H2X6, P17482, O43248, P35680, P20719, P25490, P48742, Q03164, Q12830, P40424, Q06587, P31260, P31274	1085	80	16792	2.90184	0.835989	0.0210439	0.995978
GOTERM_BP_DIRECT	GO:0000381~regulation of alternative mRNA splicing, via spliceosome	10	0.874891	0.000558337	P15172, Q9BWF3, P26599, P49756, P14866, P57052, P17844, P61326, P38159, P98175	1085	38	16792	4.07276	0.840331	0.0211072	1.01069
GOTERM_BP_DIRECT	GO:0045648~positive regulation of erythrocyte differentiation	8	0.699913	0.000599124	P27540, P51692, P17542, P26583, P14921, P15976, O60341, P23769	1085	24	16792	5.15883	0.860363	0.0223747	1.08414
GOTERM_BP_DIRECT	GO:0006379~mRNA cleavage	6	0.524934	0.00059989	Q92989, O94913, Q10570, Q9C0J8, Q9P2I0, Q05048	1085	12	16792	7.73825	0.860715	0.0221513	1.08552
GOTERM_BP_DIRECT	GO:0071392~cellular response to estradiol stimulus	9	0.787402	0.000609325	P0C0S5, P15172, P03372, Q9H7S9, Q9NVP1, Q9Y230, Q92993, P20248, Q9Y6Q9	1085	31	16792	4.49318	0.864968	0.0222459	1.1025
GOTERM_BP_DIRECT	GO:0006303~double-strand break repair via nonhomologous end joining	13	1.13736	0.000612648	Q9NP66, P38398, Q92878, Q12888, P12956, Q5UIP0, P13010, Q6ZW49, O60934, Q14676, Q92993, Q96RL1, P63165	1085	63	16792	3.19356	0.866435	0.0221202	1.10848
GOTERM_BP_DIRECT	GO:0035066~positive regulation of histone acetylation	7	0.612423	0.000675375	Q9NPI1, Q86TJ2, P38398, O75478, Q92830, Q6ZW49, Q9Y230	1085	18	16792	6.01864	0.891321	0.0240935	1.22131
GOTERM_BP_DIRECT	GO:0002181~cytoplasmic translation	8	0.699913	0.000786172	P83881, Q9UNX3, P05386, P61254, P47914, P18077, Q9UKD2, Q6DKI1	1085	25	16792	4.95248	0.924497	0.0276918	1.42032
GOTERM_BP_DIRECT	GO:0042273~ribosomal large subunit biogenesis	8	0.699913	0.000786172	O75683, Q99848, Q9UNX3, Q9Y221, P61254, Q9Y3C1, P18077, Q9NVU7	1085	25	16792	4.95248	0.924497	0.0276918	1.42032
GOTERM_BP_DIRECT	GO:0032922~circadian regulation of gene expression	12	1.04987	0.000912393	Q96EB6, Q01201, Q9Y5V3, Q15911, O15294, P11387, Q15596, P29375, P35680, Q13330, Q03164, P29590	1085	57	16792	3.25821	0.950142	0.0317285	1.64658
GOTERM_BP_DIRECT	GO:0050872~white fat cell differentiation	6	0.524934	0.0009232	Q96EB6, P56545, Q13363, Q9HAZ2, Q9BZK7, P37231	1085	13	16792	7.143	0.951883	0.0317624	1.66592
GOTERM_BP_DIRECT	GO:0030578~PML body organization	4	0.349956	0.00102146	Q9H2X6, P14921, P63165, P29590	1085	4	16792	15.4765	0.965167	0.0347218	1.84168
GOTERM_BP_DIRECT	GO:0050821~protein stabilization	20	1.74978	0.0011765	Q16543, P04406, Q09472, P21675, Q9BZE4, P63165, Q9HBM6, P51610, Q93009, P16220, Q8NFZ5, P35232, P10809, O95785, A6NNY8, Q06945, Q9H6I2, Q16594, Q99623, P29590	1085	136	16792	2.27596	0.97908	0.0394814	2.11839
GOTERM_BP_DIRECT	GO:1902895~positive regulation of pri-miRNA transcription from RNA polymerase II promoter	7	0.612423	0.00126143	P05412, Q9BVP2, Q04206, P01100, P51532, P40763, P28347	1085	20	16792	5.41677	0.984179	0.0418458	2.26967
GOTERM_BP_DIRECT	GO:0010629~negative regulation of gene expression	20	1.74978	0.00128527	P06400, Q96EB6, P21675, Q08117, P19838, P25490, P16220, O43474, P03372, Q06413, P61244, Q9UQR1, Q9H2P0, Q9UIV1, O00763, Q96F45, P63244, Q9Y2X9, Q13148, Q04864	1085	137	16792	2.25934	0.985372	0.0421943	2.31209
GOTERM_BP_DIRECT	GO:0007064~mitotic sister chromatid cohesion	6	0.524934	0.00136017	O60216, Q14683, Q29RF7, Q6KC79, Q9UQE7, Q7Z3K3	1085	14	16792	6.63278	0.988566	0.044159	2.44527
GOTERM_BP_DIRECT	GO:0043433~negative regulation of sequence-specific DNA binding transcription factor activity	12	1.04987	0.00141973	P06400, Q96EB6, O75928, P03372, Q5VWG9, Q9UMX1, P40424, O60341, P63165, Q99623, Q99496, Q9NQB0	1085	60	16792	3.0953	0.990601	0.0455988	2.55103
GOTERM_BP_DIRECT	GO:0043392~negative regulation of DNA binding	8	0.699913	0.00163372	Q01094, Q96JM2, P05412, P25963, O00712, Q01664, O60341, P63165	1085	28	16792	4.42186	0.995351	0.0517905	2.93017
GOTERM_BP_DIRECT	GO:0048096~chromatin-mediated maintenance of transcription	5	0.437445	0.00167348	Q9UIG0, Q96GM5, Q9UMN6, Q8NFD5, O14497	1085	9	16792	8.59805	0.995921	0.052512	3.00046
GOTERM_BP_DIRECT	GO:0006974~cellular response to DNA damage stimulus	26	2.27472	0.00199291	Q71UM5, Q9UBL3, Q96QE3, P21675, P54132, Q9BQI6, P38398, Q14686, O00148, P01106, Q9Y6K9, Q96EB6, Q9UIG0, Q92878, Q12888, Q9Y2K1, Q6KC79, P46937, P25490, Q15291, Q14653, P04637, Q7Z6E9, Q9NUA8, Q16594, Q9NS91	1085	208	16792	1.93456	0.998575	0.0616419	3.56342
GOTERM_BP_DIRECT	GO:0035279~mRNA cleavage involved in gene silencing by miRNA	4	0.349956	0.00243073	Q9H9G7, Q9UL18, Q9UKV8, Q9HCE1	1085	5	16792	12.3812	0.999663	0.0739916	4.33003
GOTERM_BP_DIRECT	GO:0070345~negative regulation of fat cell proliferation	4	0.349956	0.00243073	Q01094, Q14186, O00716, P23769	1085	5	16792	12.3812	0.999663	0.0739916	4.33003
GOTERM_BP_DIRECT	GO:0035948~positive regulation of gluconeogenesis by positive regulation of transcription from RNA polymerase II promoter	4	0.349956	0.00243073	Q92830, Q8NEM7, P61964, Q92831	1085	5	16792	12.3812	0.999663	0.0739916	4.33003
GOTERM_BP_DIRECT	GO:0006405~RNA export from nucleus	11	0.96238	0.00246137	Q9BY77, P84103, Q6I9Y2, P37198, Q86V81, O00148, O95391, P61326, P35658, P09651, P52948	1085	55	16792	3.0953	0.999695	0.0742033	4.38345
GOTERM_BP_DIRECT	GO:2000036~regulation of stem cell population maintenance	5	0.437445	0.00264721	O75175, Q15717, A5YKK6, P17542, Q9NZN8	1085	10	16792	7.73825	0.999835	0.0788638	4.70694
GOTERM_BP_DIRECT	GO:0000290~deadenylation-dependent decapping of nuclear-transcribed mRNA	5	0.437445	0.00264721	Q9NPI6, Q9UIV1, Q86TB9, Q58A45, Q8IZD4	1085	10	16792	7.73825	0.999835	0.0788638	4.70694
GOTERM_BP_DIRECT	GO:0033148~positive regulation of intracellular estrogen receptor signaling pathway	5	0.437445	0.00264721	O14686, P55317, P17844, Q9BTK6, Q92841	1085	10	16792	7.73825	0.999835	0.0788638	4.70694
GOTERM_BP_DIRECT	GO:0006275~regulation of DNA replication	6	0.524934	0.00266296	Q7Z6E9, O75179, Q96KQ7, P67775, P30153, Q9UQE7	1085	16	16792	5.80369	0.999843	0.078603	4.7343
GOTERM_BP_DIRECT	GO:0051028~mRNA transport	10	0.874891	0.0027685	Q9Y6M1, P55735, Q96PU8, Q32P51, P51991, Q92945, O00159, Q9NZI8, O00425, P09651	1085	47	16792	3.29287	0.999889	0.0808679	4.91751
GOTERM_BP_DIRECT	GO:0045665~negative regulation of neuron differentiation	11	0.96238	0.00282664	O15090, Q96A47, P48431, Q9NRA8, P10071, Q9NP66, P26367, O43711, Q6NW34, P40424, Q9Y6X8	1085	56	16792	3.04003	0.999908	0.0817713	5.01828
GOTERM_BP_DIRECT	GO:0007223~Wnt signaling pathway, calcium modulating pathway	9	0.787402	0.00300272	Q9H9G7, Q9UL18, P0DP24, Q9UPQ9, Q8NDV7, Q9HCJ0, Q9UKV8, Q9HCE1, Q9NQB0	1085	39	16792	3.5715	0.999949	0.0858925	5.32287
GOTERM_BP_DIRECT	GO:0009954~proximal/distal pattern formation	7	0.612423	0.00350861	P10071, P10070, O43248, P40425, P40424, Q05925, P31260	1085	24	16792	4.51398	0.99999	0.0987912	6.19286
GOTERM_BP_DIRECT	GO:0003007~heart morphogenesis	8	0.699913	0.00370566	O15550, Q8IXJ9, Q9UIG0, Q9ULJ6, O15178, Q6KC79, P52952, Q9P2D1	1085	32	16792	3.86912	0.999995	0.103171	6.52969
GOTERM_BP_DIRECT	GO:0035914~skeletal muscle cell differentiation	10	0.874891	0.00371867	P06400, Q14814, P15172, Q86UU0, O00512, Q06413, Q9P0W2, Q13887, P50402, P01100	1085	49	16792	3.15847	0.999995	0.102647	6.5519
GOTERM_BP_DIRECT	GO:0021762~substantia nigra development	10	0.874891	0.00371867	P24539, P80723, O15027, Q9H7L9, P0DP24, P12277, Q9UQR1, P63167, P60709, Q04917	1085	49	16792	3.15847	0.999995	0.102647	6.5519
GOTERM_BP_DIRECT	GO:0060213~positive regulation of nuclear-transcribed mRNA poly(A) tail shortening	5	0.437445	0.00394874	A5YKK6, Q9UPQ9, Q9HCJ0, Q9UIV1, Q9UKV8	1085	11	16792	7.03477	0.999998	0.107752	6.94362
GOTERM_BP_DIRECT	GO:1901653~cellular response to peptide	5	0.437445	0.00394874	O43474, Q9UIH9, P57682, Q13118, Q13887	1085	11	16792	7.03477	0.999998	0.107752	6.94362
GOTERM_BP_DIRECT	GO:0045666~positive regulation of neuron differentiation	13	1.13736	0.00409964	P37275, P15923, Q06413, P10070, Q9P0W2, P55317, P52952, P15884, O60271, Q99081, Q15788, P41161, P23769	1085	78	16792	2.57942	0.999999	0.110724	7.19971
GOTERM_BP_DIRECT	GO:0019827~stem cell population maintenance	10	0.874891	0.00428078	O43474, Q9NVC6, Q9NRA8, Q14683, Q6KC79, Q5UIP0, Q9UQE7, O15047, O75448, Q9BTT4	1085	50	16792	3.0953	0.999999	0.114398	7.50623
GOTERM_BP_DIRECT	GO:0048589~developmental growth	7	0.612423	0.00436832	P10071, P23771, P10070, Q9ULJ6, Q9BRQ0, Q6KC79, P56693	1085	25	16792	4.33342	0.999999	0.115664	7.65404
GOTERM_BP_DIRECT	GO:0034773~histone H4-K20 trimethylation	4	0.349956	0.00462828	Q13610, Q4LE39, P29374, Q5T5X7	1085	6	16792	10.3177	1	0.121154	8.09161
GOTERM_BP_DIRECT	GO:0001658~branching involved in ureteric bud morphogenesis	9	0.787402	0.00485412	P10071, Q06710, Q9NSC2, P48436, P31277, P01106, P40424, P48742, Q02962	1085	42	16792	3.31639	1	0.125694	8.47016
GOTERM_BP_DIRECT	GO:0071300~cellular response to retinoic acid	12	1.04987	0.00498142	O43474, Q06413, O15294, Q15562, Q13573, O15178, P48436, P08621, P46937, P01106, P37231, Q02962	1085	70	16792	2.65311	1	0.127774	8.68289
GOTERM_BP_DIRECT	GO:0031047~gene silencing by RNA	16	1.39983	0.00509811	O75175, Q9UL18, Q9UPQ9, Q8NDV7, Q9UKZ1, Q99567, Q9UKV8, Q9NZN8, P52948, Q9H9A5, P37198, Q9UIV1, P68431, Q92600, Q7Z3B4, P35658	1085	111	16792	2.23085	1	0.129564	8.87749
GOTERM_BP_DIRECT	GO:0006417~regulation of translation	10	0.874891	0.005602	Q9H9A5, Q99700, Q96EY7, Q9UKZ1, P61326, Q8ND56, P62263, Q15397, P63173, Q9BX40	1085	52	16792	2.97625	1	0.14038	9.71326
GOTERM_BP_DIRECT	GO:0033147~negative regulation of intracellular estrogen receptor signaling pathway	5	0.437445	0.00562317	A5YKK6, P38398, Q9NZN8, Q92600, Q99623	1085	12	16792	6.44854	1	0.139811	9.74821
GOTERM_BP_DIRECT	GO:0060766~negative regulation of androgen receptor signaling pathway	5	0.437445	0.00562317	Q96EB6, O75928, P35232, Q9H334, P51532	1085	12	16792	6.44854	1	0.139811	9.74821
GOTERM_BP_DIRECT	GO:0032727~positive regulation of interferon-alpha production	5	0.437445	0.00562317	Q7Z2W4, P10809, P09429, Q13568, Q14653	1085	12	16792	6.44854	1	0.139811	9.74821
GOTERM_BP_DIRECT	GO:0001655~urogenital system development	5	0.437445	0.00562317	Q9NRZ9, Q06710, P48742, Q02962, P23769	1085	12	16792	6.44854	1	0.139811	9.74821
GOTERM_BP_DIRECT	GO:0030220~platelet formation	6	0.524934	0.00603031	Q06413, Q09472, P17542, O75083, P15976, P35579	1085	19	16792	4.88732	1	0.148059	10.418
GOTERM_BP_DIRECT	GO:0090190~positive regulation of branching involved in ureteric bud morphogenesis	6	0.524934	0.00603031	Q9Y5V3, Q06710, P48436, P48742, Q02962, Q9UIU6	1085	19	16792	4.88732	1	0.148059	10.418
GOTERM_BP_DIRECT	GO:0030154~cell differentiation	45	3.93701	0.00621947	Q9UPN4, P27540, Q9Y603, Q99581, Q03112, Q02575, Q14781, Q06546, O95677, P85037, P41161, Q9BWF3, Q9UKW6, Q5JSZ5, Q9BQE9, Q06710, Q99607, P52952, P50548, P28324, Q9UKY1, P41212, P49116, Q12824, Q99504, Q9H4I2, P32519, Q13501, Q7Z6Z7, P25490, O60248, Q9UM82, P04637, P41970, Q01543, P41162, P17036, P48634, O95365, P11308, P57052, P10244, Q15723, Q7Z7C8, P43268	1085	462	16792	1.50745	1	0.151222	10.7276
GOTERM_BP_DIRECT	GO:0055007~cardiac muscle cell differentiation	7	0.612423	0.0065388	Q92908, Q92830, Q9HB71, P52952, P35712, Q9H334, O14497	1085	27	16792	4.01243	1	0.157208	11.2479
GOTERM_BP_DIRECT	GO:0009791~post-embryonic development	12	1.04987	0.00687363	Q9Y3Y4, Q6Y7W6, P23771, Q9BRQ0, Q9UKV8, O15409, Q6N021, P35712, Q03164, Q14865, P48742, O75626	1085	73	16792	2.54408	1	0.163399	11.7904
GOTERM_BP_DIRECT	GO:0007049~cell cycle	25	2.18723	0.00696975	Q9UPT9, Q96HI0, Q96GY3, Q9NPI1, Q12824, P21675, Q96C92, O60925, P51610, P04637, P38398, Q9P0W2, Q5TKA1, Q6MZP7, Q8N9N5, P63244, O75400, Q6N021, Q5UIP0, Q9UK53, P50548, Q8IX12, O00716, Q13227, Q9NQC7	1085	217	16792	1.78301	1	0.164311	11.9455
GOTERM_BP_DIRECT	GO:0048511~rhythmic process	10	0.874891	0.00721777	Q08211, Q00653, Q96ST3, P63244, P17844, Q92793, P37231, P08047, Q92831, P23511	1085	54	16792	2.86602	1	0.168453	12.3447
GOTERM_BP_DIRECT	GO:0008584~male gonad development	14	1.22485	0.00724167	P43694, Q92908, O60248, P15976, Q13162, Q15788, P03372, P23771, P26583, P48436, P29375, Q14865, P31260, Q9UIU6	1085	94	16792	2.30501	1	0.167779	12.3831
GOTERM_BP_DIRECT	GO:0042769~DNA damage response, detection of DNA damage	8	0.699913	0.00734128	P82912, P0CG48, P35251, Q06945, P82933, P82673, Q9BYN8, Q9NS91	1085	36	16792	3.43922	1	0.168706	12.5428
GOTERM_BP_DIRECT	GO:0051457~maintenance of protein location in nucleus	5	0.437445	0.00771204	P63208, O94864, Q5VWG9, Q7Z7C8, P29590	1085	13	16792	5.9525	1	0.175245	13.1351
GOTERM_BP_DIRECT	GO:1902166~negative regulation of intrinsic apoptotic signaling pathway in response to DNA damage by p53 class mediator	5	0.437445	0.00771204	Q96EB6, Q9H160, O60341, Q16594, Q9HBM6	1085	13	16792	5.9525	1	0.175245	13.1351
GOTERM_BP_DIRECT	GO:0000956~nuclear-transcribed mRNA catabolic process	5	0.437445	0.00771204	Q8IZH2, Q9UL18, Q5TC82, Q9UKD2, Q92900	1085	13	16792	5.9525	1	0.175245	13.1351
GOTERM_BP_DIRECT	GO:0021527~spinal cord association neuron differentiation	5	0.437445	0.00771204	P61968, P23759, P17542, Q9UBR4, P48742	1085	13	16792	5.9525	1	0.175245	13.1351
GOTERM_BP_DIRECT	GO:0035065~regulation of histone acetylation	4	0.349956	0.00771232	Q9Y3Y4, Q9BRQ0, P49711, P23769	1085	7	16792	8.84371	1	0.174055	13.1355
GOTERM_BP_DIRECT	GO:0048793~pronephros development	4	0.349956	0.00771232	Q06710, P35680, P48742, Q02962	1085	7	16792	8.84371	1	0.174055	13.1355
GOTERM_BP_DIRECT	GO:0032808~lacrimal gland development	4	0.349956	0.00771232	P26367, P48436, Q12948, P56693	1085	7	16792	8.84371	1	0.174055	13.1355
GOTERM_BP_DIRECT	GO:0021902~commitment of neuronal cell to specific neuron type in forebrain	4	0.349956	0.00771232	P26367, Q9UPW6, Q16650, P23769	1085	7	16792	8.84371	1	0.174055	13.1355
GOTERM_BP_DIRECT	GO:0042035~regulation of cytokine biosynthetic process	4	0.349956	0.00771232	Q9Y6M1, P23771, Q9NZI8, O00425	1085	7	16792	8.84371	1	0.174055	13.1355
GOTERM_BP_DIRECT	GO:0090503~RNA phosphodiester bond hydrolysis, exonucleolytic	7	0.612423	0.00787655	A5YKK6, Q9H0D6, Q9UIV1, Q9NZN8, Q58A45, Q8TF46, Q9UFF9	1085	28	16792	3.86912	1	0.176225	13.3966
GOTERM_BP_DIRECT	GO:0043388~positive regulation of DNA binding	7	0.612423	0.00787655	P12755, P0DP24, Q9H2X6, P26583, Q15306, P01106, P09429	1085	28	16792	3.86912	1	0.176225	13.3966
GOTERM_BP_DIRECT	GO:0043627~response to estrogen	11	0.96238	0.00842324	O14686, P03372, Q9UBL3, P10071, Q92908, P23771, Q09472, P38398, P10809, Q15291, P37231	1085	65	16792	2.6191	1	0.186031	14.2605
GOTERM_BP_DIRECT	GO:0006368~transcription elongation from RNA polymerase II promoter	13	1.13736	0.00901396	Q15542, Q6I9Y2, P49848, P21675, P20226, Q5VWG9, Q9HBM6, Q12962, Q8IZX4, O00268, Q16514, Q6P1X5, Q16594	1085	86	16792	2.33947	1	0.196449	15.1848
GOTERM_BP_DIRECT	GO:0043928~exonucleolytic nuclear-transcribed mRNA catabolic process involved in deadenylation-dependent decay	7	0.612423	0.00940039	Q9NPI6, Q96F86, Q6P2E9, Q9UIV1, Q86TB9, Q9UFF9, Q8IZD4	1085	29	16792	3.73571	1	0.202656	15.7844
GOTERM_BP_DIRECT	GO:0030520~intracellular estrogen receptor signaling pathway	6	0.524934	0.00947914	Q96PK6, P03372, Q14686, Q8TDD1, O75528, O14497	1085	21	16792	4.42186	1	0.202857	15.9061
GOTERM_BP_DIRECT	GO:0051403~stress-activated MAPK cascade	6	0.524934	0.00947914	Q8NFZ5, Q9BWF3, P0CG48, P63208, P19838, Q9Y6K9	1085	21	16792	4.42186	1	0.202857	15.9061
GOTERM_BP_DIRECT	GO:1903507~negative regulation of nucleic acid-templated transcription	9	0.787402	0.0097337	Q99581, Q14207, Q9BQ87, P54198, Q8TDD1, Q13330, P46937, O95551, Q8IX12	1085	47	16792	2.96358	1	0.206391	16.2983
GOTERM_BP_DIRECT	GO:0001843~neural tube closure	12	1.04987	0.0102201	P61968, O95487, O15550, P12755, O75398, Q15562, Q92830, O15178, Q9UMX1, Q02962, O14497, P50458	1085	77	16792	2.41192	1	0.21419	17.0429
GOTERM_BP_DIRECT	GO:1900153~positive regulation of nuclear-transcribed mRNA catabolic process, deadenylation-dependent decay	5	0.437445	0.0102528	A5YKK6, Q9UPQ9, Q9HCJ0, Q9UIV1, Q9UKV8	1085	14	16792	5.52732	1	0.213452	17.0927
GOTERM_BP_DIRECT	GO:0044030~regulation of DNA methylation	5	0.437445	0.0102528	Q9UBB5, P38398, Q96KQ7, Q13129, Q8NB78	1085	14	16792	5.52732	1	0.213452	17.0927
GOTERM_BP_DIRECT	GO:1901224~positive regulation of NIK/NF-kappaB signaling	5	0.437445	0.0102528	Q9H9G7, Q9UL18, Q5TC82, P09429, O43707	1085	14	16792	5.52732	1	0.213452	17.0927
GOTERM_BP_DIRECT	GO:0034968~histone lysine methylation	5	0.437445	0.0102528	Q15047, Q03112, Q13029, Q96KQ7, Q9HAZ2	1085	14	16792	5.52732	1	0.213452	17.0927
GOTERM_BP_DIRECT	GO:0000380~alternative mRNA splicing, via spliceosome	5	0.437445	0.0102528	Q96IZ7, P26599, P52272, O95391, O60341	1085	14	16792	5.52732	1	0.213452	17.0927
GOTERM_BP_DIRECT	GO:0006768~biotin metabolic process	5	0.437445	0.0102528	P05165, Q9HCC0, P05166, O00763, Q96RQ3	1085	14	16792	5.52732	1	0.213452	17.0927
GOTERM_BP_DIRECT	GO:1900740~positive regulation of protein insertion into mitochondrial membrane involved in apoptotic signaling pathway	7	0.612423	0.0111233	P04637, Q01094, Q96FJ2, Q96KQ4, P63167, Q14186, Q04917	1085	30	16792	3.61118	1	0.227996	18.409
GOTERM_BP_DIRECT	GO:0072091~regulation of stem cell proliferation	4	0.349956	0.0117519	Q9H9G7, P26583, P46937, Q9H6I2	1085	8	16792	7.73825	1	0.237814	19.3473
GOTERM_BP_DIRECT	GO:0072321~chaperone-mediated protein transport	4	0.349956	0.0117519	P62072, Q9Y5J7, Q9Y5J9, Q9Y5L4	1085	8	16792	7.73825	1	0.237814	19.3473
GOTERM_BP_DIRECT	GO:1900246~positive regulation of RIG-I signaling pathway	4	0.349956	0.0117519	Q8TB72, Q7Z2W4, O75179, Q14671	1085	8	16792	7.73825	1	0.237814	19.3473
GOTERM_BP_DIRECT	GO:1900212~negative regulation of mesenchymal cell apoptotic process involved in metanephros development	3	0.262467	0.0119544	Q06710, P35680, Q02962	1085	3	16792	15.4765	1	0.239937	19.6474
GOTERM_BP_DIRECT	GO:0010725~regulation of primitive erythrocyte differentiation	3	0.262467	0.0119544	P15976, O60341, P23769	1085	3	16792	15.4765	1	0.239937	19.6474
GOTERM_BP_DIRECT	GO:0018076~N-terminal peptidyl-lysine acetylation	3	0.262467	0.0119544	Q09472, Q92793, Q92831	1085	3	16792	15.4765	1	0.239937	19.6474
GOTERM_BP_DIRECT	GO:0021776~smoothened signaling pathway involved in spinal cord motor neuron cell fate specification	3	0.262467	0.0119544	P10071, P10070, Q9UMX1	1085	3	16792	15.4765	1	0.239937	19.6474
GOTERM_BP_DIRECT	GO:0021775~smoothened signaling pathway involved in ventral spinal cord interneuron specification	3	0.262467	0.0119544	P10071, P10070, Q9UMX1	1085	3	16792	15.4765	1	0.239937	19.6474
GOTERM_BP_DIRECT	GO:0031937~positive regulation of chromatin silencing	3	0.262467	0.0119544	Q96EB6, Q96ST3, Q8N108	1085	3	16792	15.4765	1	0.239937	19.6474
GOTERM_BP_DIRECT	GO:0006457~protein folding	21	1.83727	0.0123817	P19784, Q16543, P30101, P27824, Q9HAV7, Q02790, O60925, P67870, Q9Y230, Q13356, Q13952, P13667, P62937, Q8WUA2, Q15084, Q9H2H8, P14625, O95757, P61758, Q9NQP4, Q9Y3C6	1085	180	16792	1.80559	1	0.245922	20.277
GOTERM_BP_DIRECT	GO:0042771~intrinsic apoptotic signaling pathway in response to DNA damage by p53 class mediator	7	0.612423	0.0130578	P04637, Q96EB6, Q71UM5, Q09472, Q9H2X6, Q13573, P29590	1085	31	16792	3.49469	1	0.256016	21.2639
GOTERM_BP_DIRECT	GO:0030326~embryonic limb morphogenesis	8	0.699913	0.013112	Q9NR56, P12755, P40425, P56179, P0CG40, P40424, P20823, P31260	1085	40	16792	3.0953	1	0.255432	21.3425
GOTERM_BP_DIRECT	GO:0030330~DNA damage response, signal transduction by p53 class mediator	5	0.437445	0.0132783	P04637, Q9UM54, P46100, O60934, Q6ZW49	1085	15	16792	5.15883	1	0.256732	21.5833
GOTERM_BP_DIRECT	GO:0048821~erythrocyte development	5	0.437445	0.0132783	Q9NYL9, P29374, P62753, P35712, P15976	1085	15	16792	5.15883	1	0.256732	21.5833
GOTERM_BP_DIRECT	GO:0000729~DNA double-strand break processing	5	0.437445	0.0132783	P38398, Q92878, P54132, O60934, Q92993	1085	15	16792	5.15883	1	0.256732	21.5833
GOTERM_BP_DIRECT	GO:0042795~snRNA transcription from RNA polymerase II promoter	11	0.96238	0.0139828	Q15542, P49848, Q9BXP5, Q5VT52, P20226, Q96CB8, P14859, P52747, P08047, Q16594, Q7Z7C8	1085	70	16792	2.43202	1	0.266886	22.5954
GOTERM_BP_DIRECT	GO:0007507~heart development	21	1.83727	0.0146502	Q9UBB5, Q6W2J9, P10071, Q09472, P10070, Q5T481, Q9UHF7, P15976, Q12952, Q02078, Q06413, P23771, Q14686, P27708, Q9NSC2, Q14934, P52952, Q06945, P37231, Q12948, P23769	1085	183	16792	1.77599	1	0.276181	23.5429
GOTERM_BP_DIRECT	GO:0000462~maturation of SSU-rRNA from tricistronic rRNA transcript (SSU-rRNA, 5.8S rRNA, LSU-rRNA)	7	0.612423	0.015216	P82912, Q13601, P78316, P82933, Q14692, P62263, P62847	1085	32	16792	3.38548	1	0.283636	24.3374
GOTERM_BP_DIRECT	GO:0007010~cytoskeleton organization	19	1.66229	0.0160845	Q01082, O95619, Q5VZL5, Q71U36, O95425, P26038, P60709, P23528, Q9UBW7, P68371, Q13813, P09493, Q71RC2, P13647, Q14202, P48436, O75400, Q96B97, Q9UGP4	1085	161	16792	1.82642	1	0.295623	25.542
GOTERM_BP_DIRECT	GO:0098609~cell-cell adhesion	28	2.44969	0.0164752	P07355, Q9UM54, Q9UHB6, Q01082, P42224, Q6P1N0, P51610, Q6Y7W6, Q96AG4, P47914, Q9UNF0, P50402, Q7Z2W4, Q5T6F2, P49207, P22061, P35613, O00567, Q16643, Q92522, Q13813, Q9NYL9, P68431, P63244, O76021, O43795, Q14847, Q6WCQ1	1085	271	16792	1.59905	1	0.300003	26.0779
GOTERM_BP_DIRECT	GO:0035563~positive regulation of chromatin binding	4	0.349956	0.0167911	P56545, Q9UBB5, Q9BRQ0, O60341	1085	9	16792	6.87844	1	0.303171	26.5086
GOTERM_BP_DIRECT	GO:0042921~glucocorticoid receptor signaling pathway	4	0.349956	0.0167911	Q96PK6, Q14686, Q04917, O14497	1085	9	16792	6.87844	1	0.303171	26.5086
GOTERM_BP_DIRECT	GO:0016070~RNA metabolic process	4	0.349956	0.0167911	Q99700, Q9H0D6, Q8TDD1, Q9GZR7	1085	9	16792	6.87844	1	0.303171	26.5086
GOTERM_BP_DIRECT	GO:1902894~negative regulation of pri-miRNA transcription from RNA polymerase II promoter	4	0.349956	0.0167911	Q14934, P48436, O00712, Q12968	1085	9	16792	6.87844	1	0.303171	26.5086
GOTERM_BP_DIRECT	GO:0051569~regulation of histone H3-K4 methylation	4	0.349956	0.0167911	P23771, Q96KQ7, Q9BRQ0, Q9UMN6	1085	9	16792	6.87844	1	0.303171	26.5086
GOTERM_BP_DIRECT	GO:0010608~posttranscriptional regulation of gene expression	5	0.437445	0.0168168	Q8TB72, Q16543, Q14671, Q5TC82, P43243	1085	16	16792	4.83641	1	0.301931	26.5435
GOTERM_BP_DIRECT	GO:0035162~embryonic hemopoiesis	5	0.437445	0.0168168	P23771, P17542, P15976, P40424, Q03164	1085	16	16792	4.83641	1	0.301931	26.5435
GOTERM_BP_DIRECT	GO:0006349~regulation of gene expression by genetic imprinting	5	0.437445	0.0168168	Q4LE39, P38398, P29374, P49711, Q8NB78	1085	16	16792	4.83641	1	0.301931	26.5435
GOTERM_BP_DIRECT	GO:0035994~response to muscle stretch	5	0.437445	0.0168168	P05412, P25963, Q04206, P19838, P01100	1085	16	16792	4.83641	1	0.301931	26.5435
GOTERM_BP_DIRECT	GO:0006978~DNA damage response, signal transduction by p53 class mediator resulting in transcription of p21 class mediator	5	0.437445	0.0168168	P04637, P38398, Q9H2X6, Q92993, Q01664	1085	16	16792	4.83641	1	0.301931	26.5435
GOTERM_BP_DIRECT	GO:0051149~positive regulation of muscle cell differentiation	6	0.524934	0.0168689	Q02078, P15172, P15923, Q9BWF3, Q06413, O60271	1085	24	16792	3.86912	1	0.301101	26.6142
GOTERM_BP_DIRECT	GO:0051091~positive regulation of sequence-specific DNA binding transcription factor activity	14	1.22485	0.0175581	P15923, Q09472, Q12824, Q12888, Q9H2X6, O60341, P51532, P03372, Q9UQL6, Q16514, P55317, P37231, Q14865, Q99623	1085	105	16792	2.06353	1	0.309709	27.5444
GOTERM_BP_DIRECT	GO:0042472~inner ear morphogenesis	9	0.787402	0.0175601	A7XYQ1, P23771, Q06710, Q12951, P56179, Q02962, Q9P2D1, Q9UIU6, P23769	1085	52	16792	2.67862	1	0.308117	27.5471
GOTERM_BP_DIRECT	GO:0010628~positive regulation of gene expression	27	2.3622	0.0194635	Q01094, Q99581, Q9H9G7, Q5T6F2, P26367, P26038, O75528, Q96I24, Q14157, O75626, O75030, O14964, P51610, Q9Y6Q9, P04637, O43474, Q96AE4, Q96PU8, O15550, Q06413, P35232, P38398, Q04724, P68032, P49711, P01106, P40763	1085	262	16792	1.59491	1	0.333748	30.0582
GOTERM_BP_DIRECT	GO:0007569~cell aging	6	0.524934	0.019994	P04637, Q96EB6, Q99583, P37198, Q9ULJ6, P06748	1085	25	16792	3.71436	1	0.339436	30.7433
GOTERM_BP_DIRECT	GO:0022604~regulation of cell morphogenesis	6	0.524934	0.019994	Q86UU0, Q5VZL5, Q71RC2, Q14202, P23528, Q9UBW7	1085	25	16792	3.71436	1	0.339436	30.7433
GOTERM_BP_DIRECT	GO:0030902~hindbrain development	5	0.437445	0.0208914	P10070, P35680, O00712, Q16650, Q8NHM5	1085	17	16792	4.55191	1	0.349997	31.8878
GOTERM_BP_DIRECT	GO:0070935~3'-UTR-mediated mRNA stabilization	5	0.437445	0.0208914	Q15717, Q13151, P07910, Q13148, P98175	1085	17	16792	4.55191	1	0.349997	31.8878
GOTERM_BP_DIRECT	GO:0006334~nucleosome assembly	15	1.31234	0.0211623	P25440, O60814, Q9Y294, P46100, O60264, Q92522, P06748, P10412, P55209, Q99733, P26583, P68431, P06899, P48436, Q6NXT2	1085	119	16792	1.95082	1	0.351913	32.2298
GOTERM_BP_DIRECT	GO:0048146~positive regulation of fibroblast proliferation	9	0.787402	0.021694	P07355, Q01094, P05412, P03372, Q9ULJ6, P01106, P20248, Q9HAH7, P29590	1085	54	16792	2.57942	1	0.357262	32.8961
GOTERM_BP_DIRECT	GO:0071481~cellular response to X-ray	4	0.349956	0.0228528	P12956, Q12888, Q6KC79, P13010	1085	10	16792	6.1906	1	0.370648	34.3273
GOTERM_BP_DIRECT	GO:0007084~mitotic nuclear envelope reassembly	4	0.349956	0.0228528	P63151, P67775, P30153, P50402	1085	10	16792	6.1906	1	0.370648	34.3273
GOTERM_BP_DIRECT	GO:0006476~protein deacetylation	4	0.349956	0.0228528	Q96EB6, Q96ST3, Q9UQL6, O15379	1085	10	16792	6.1906	1	0.370648	34.3273
GOTERM_BP_DIRECT	GO:2000637~positive regulation of gene silencing by miRNA	4	0.349956	0.0228528	Q8TB72, Q14671, Q9UGP4, P40763	1085	10	16792	6.1906	1	0.370648	34.3273
GOTERM_BP_DIRECT	GO:0060487~lung epithelial cell differentiation	4	0.349956	0.0228528	P48436, P55317, P46937, Q14980	1085	10	16792	6.1906	1	0.370648	34.3273
GOTERM_BP_DIRECT	GO:0060018~astrocyte fate commitment	3	0.262467	0.0228874	P17542, Q9NP62, P48436	1085	4	16792	11.6074	1	0.369324	34.3696
GOTERM_BP_DIRECT	GO:0032392~DNA geometric change	3	0.262467	0.0228874	O15347, P26583, P09429	1085	4	16792	11.6074	1	0.369324	34.3696
GOTERM_BP_DIRECT	GO:0060486~Clara cell differentiation	3	0.262467	0.0228874	Q92908, Q06330, O00712	1085	4	16792	11.6074	1	0.369324	34.3696
GOTERM_BP_DIRECT	GO:0010835~regulation of protein ADP-ribosylation	3	0.262467	0.0228874	Q9H2P0, Q15397, Q92831	1085	4	16792	11.6074	1	0.369324	34.3696
GOTERM_BP_DIRECT	GO:0051572~negative regulation of histone H3-K4 methylation	3	0.262467	0.0228874	Q6W2J9, P38398, O60341	1085	4	16792	11.6074	1	0.369324	34.3696
GOTERM_BP_DIRECT	GO:0090625~mRNA cleavage involved in gene silencing by siRNA	3	0.262467	0.0228874	Q9H9G7, Q9UL18, Q9UKV8	1085	4	16792	11.6074	1	0.369324	34.3696
GOTERM_BP_DIRECT	GO:0048386~positive regulation of retinoic acid receptor signaling pathway	3	0.262467	0.0228874	P13056, P56545, Q8IXJ9	1085	4	16792	11.6074	1	0.369324	34.3696
GOTERM_BP_DIRECT	GO:0000154~rRNA modification	3	0.262467	0.0228874	Q9H0A0, Q9Y2X3, O00567	1085	4	16792	11.6074	1	0.369324	34.3696
GOTERM_BP_DIRECT	GO:0072289~metanephric nephron tubule formation	3	0.262467	0.0228874	Q06710, P48436, Q02962	1085	4	16792	11.6074	1	0.369324	34.3696
GOTERM_BP_DIRECT	GO:0003170~heart valve development	3	0.262467	0.0228874	O43829, P48436, O75626	1085	4	16792	11.6074	1	0.369324	34.3696
GOTERM_BP_DIRECT	GO:2000741~positive regulation of mesenchymal stem cell differentiation	3	0.262467	0.0228874	P48436, P35711, P35712	1085	4	16792	11.6074	1	0.369324	34.3696
GOTERM_BP_DIRECT	GO:0031087~deadenylation-independent decapping of nuclear-transcribed mRNA	3	0.262467	0.0228874	Q9NPI6, Q96F86, Q8IZD4	1085	4	16792	11.6074	1	0.369324	34.3696
GOTERM_BP_DIRECT	GO:0090043~regulation of tubulin deacetylation	3	0.262467	0.0228874	Q09472, O75478, O75528	1085	4	16792	11.6074	1	0.369324	34.3696
GOTERM_BP_DIRECT	GO:0000731~DNA synthesis involved in DNA repair	7	0.612423	0.0231438	Q96EB6, P38398, Q92878, P54132, O60934, Q92993, Q9Y253	1085	35	16792	3.0953	1	0.370847	34.6821
GOTERM_BP_DIRECT	GO:0060021~palate development	11	0.96238	0.0238279	Q6W2J9, P12755, Q06413, P10071, Q9UPW6, Q9HAZ2, Q9BRQ0, P56179, Q14865, P63165, Q9P2D1	1085	76	16792	2.24002	1	0.377732	35.509
GOTERM_BP_DIRECT	GO:0010971~positive regulation of G2/M transition of mitotic cell cycle	5	0.437445	0.0255207	Q6STE5, Q96ST3, Q9BTC8, Q9P258, P40424	1085	18	16792	4.29903	1	0.396795	37.5131
GOTERM_BP_DIRECT	GO:0006402~mRNA catabolic process	5	0.437445	0.0255207	Q9H9G7, Q92945, Q92600, Q8TF46, Q9Y6X8	1085	18	16792	4.29903	1	0.396795	37.5131
GOTERM_BP_DIRECT	GO:0001570~vasculogenesis	9	0.787402	0.0264716	Q96PU8, Q8WW38, Q9ULJ6, Q15562, O15178, Q6ZW49, P52952, P46937, Q9H6I2	1085	56	16792	2.48729	1	0.406362	38.613
GOTERM_BP_DIRECT	GO:0045165~cell fate commitment	8	0.699913	0.0269822	Q92908, P43694, P23771, P17542, Q9UHF7, P37231, O75626, P29590	1085	46	16792	2.69156	1	0.410543	39.1959
GOTERM_BP_DIRECT	GO:0051225~spindle assembly	6	0.524934	0.0273241	Q8TEP8, P07437, Q9ULG1, O75376, O15379, Q9H6D7	1085	27	16792	3.43922	1	0.412698	39.5834
GOTERM_BP_DIRECT	GO:0032728~positive regulation of interferon-beta production	6	0.524934	0.0273241	Q7Z2W4, P10914, P26583, P09429, Q13568, Q14653	1085	27	16792	3.43922	1	0.412698	39.5834
GOTERM_BP_DIRECT	GO:0033169~histone H3-K9 demethylation	4	0.349956	0.0299418	Q15652, O75151, Q9UPP1, O60341	1085	11	16792	5.62782	1	0.440432	42.4734
GOTERM_BP_DIRECT	GO:0042551~neuron maturation	4	0.349956	0.0299418	P06400, Q99581, Q9NZR4, O60341	1085	11	16792	5.62782	1	0.440432	42.4734
GOTERM_BP_DIRECT	GO:0032332~positive regulation of chondrocyte differentiation	5	0.437445	0.0307181	P10071, Q04206, P48436, P35711, P35712	1085	19	16792	4.07276	1	0.447021	43.305
GOTERM_BP_DIRECT	GO:0008045~motor neuron axon guidance	5	0.437445	0.0307181	Q9UBR4, Q969G2, P48742, Q9H334, P43268	1085	19	16792	4.07276	1	0.447021	43.305
GOTERM_BP_DIRECT	GO:0030111~regulation of Wnt signaling pathway	5	0.437445	0.0307181	Q12952, P67775, P30153, P35680, P20823	1085	19	16792	4.07276	1	0.447021	43.305
GOTERM_BP_DIRECT	GO:0000028~ribosomal small subunit assembly	5	0.437445	0.0307181	P08708, P82912, Q71UM5, Q9Y2R9, P62263	1085	19	16792	4.07276	1	0.447021	43.305
GOTERM_BP_DIRECT	GO:0007067~mitotic nuclear division	25	2.18723	0.0309641	O75665, Q9UQ88, O95619, Q99567, O75478, O75528, O43823, P62753, P20248, Q9ULW0, Q5HY92, Q69YH5, P37198, O60216, Q9NRZ9, Q86U86, Q00610, Q9P258, Q9UQE7, Q9H6D7, Q14980, P63279, Q9H981, O94762, Q8NHZ8	1085	248	16792	1.56013	1	0.447788	43.5662
GOTERM_BP_DIRECT	GO:0003281~ventricular septum development	6	0.524934	0.0315519	P61968, P43694, P23771, Q9NSC2, Q9UMX1, O75626	1085	28	16792	3.31639	1	0.452185	44.1855
GOTERM_BP_DIRECT	GO:0006378~mRNA polyadenylation	6	0.524934	0.0315519	Q92989, O94913, Q10570, O95639, Q9P2I0, Q05048	1085	28	16792	3.31639	1	0.452185	44.1855
GOTERM_BP_DIRECT	GO:0043488~regulation of mRNA stability	13	1.13736	0.0334378	Q15717, P28074, Q9NPI6, Q8TB72, Q8IZH2, P25789, P0CG48, Q14671, Q5TC82, Q92945, Q9Y5A9, P60900, P35658	1085	103	16792	1.95334	1	0.469949	46.1297
GOTERM_BP_DIRECT	GO:0030522~intracellular receptor signaling pathway	7	0.612423	0.0334538	P27540, Q15596, P41235, Q9H0E9, Q15788, P40763, Q9Y6Q9	1085	38	16792	2.85093	1	0.468208	46.1459
GOTERM_BP_DIRECT	GO:0045214~sarcomere organization	6	0.524934	0.0361667	P09493, Q9Y281, O75083, P52952, Q9H334, Q9UIU6	1085	29	16792	3.20203	1	0.493296	48.83
GOTERM_BP_DIRECT	GO:0030318~melanocyte differentiation	5	0.437445	0.0364926	Q9Y4I1, Q06413, P10071, P56693, O75030	1085	20	16792	3.86912	1	0.494515	49.1438
GOTERM_BP_DIRECT	GO:0051891~positive regulation of cardioblast differentiation	3	0.262467	0.0365252	Q92908, P43694, P52952	1085	5	16792	9.2859	1	0.492908	49.175
GOTERM_BP_DIRECT	GO:0036124~histone H3-K9 trimethylation	3	0.262467	0.0365252	Q4LE39, P29374, Q5T5X7	1085	5	16792	9.2859	1	0.492908	49.175
GOTERM_BP_DIRECT	GO:0045039~protein import into mitochondrial inner membrane	3	0.262467	0.0365252	P62072, Q9Y5J7, Q9Y5L4	1085	5	16792	9.2859	1	0.492908	49.175
GOTERM_BP_DIRECT	GO:0010571~positive regulation of nuclear cell cycle DNA replication	3	0.262467	0.0365252	Q9ULG1, O95785, P46100	1085	5	16792	9.2859	1	0.492908	49.175
GOTERM_BP_DIRECT	GO:0003211~cardiac ventricle formation	3	0.262467	0.0365252	Q06413, P52952, Q06945	1085	5	16792	9.2859	1	0.492908	49.175
GOTERM_BP_DIRECT	GO:0065004~protein-DNA complex assembly	3	0.262467	0.0365252	P15884, P35680, O75925	1085	5	16792	9.2859	1	0.492908	49.175
GOTERM_BP_DIRECT	GO:0033600~negative regulation of mammary gland epithelial cell proliferation	3	0.262467	0.0365252	P23771, Q99623, P43268	1085	5	16792	9.2859	1	0.492908	49.175
GOTERM_BP_DIRECT	GO:0033599~regulation of mammary gland epithelial cell proliferation	3	0.262467	0.0365252	O75398, Q9BRQ0, P20719	1085	5	16792	9.2859	1	0.492908	49.175
GOTERM_BP_DIRECT	GO:0031063~regulation of histone deacetylation	3	0.262467	0.0365252	O75478, O75528, O43257	1085	5	16792	9.2859	1	0.492908	49.175
GOTERM_BP_DIRECT	GO:0010212~response to ionizing radiation	8	0.699913	0.0367005	P38398, Q99504, P02533, Q6ZW49, Q13330, Q92993, Q96RL1, Q8NHY2	1085	49	16792	2.52678	1	0.49268	49.343
GOTERM_BP_DIRECT	GO:0014070~response to organic cyclic compound	8	0.699913	0.0367005	P18846, O00763, P46013, Q92830, Q6N021, P35680, P28288, Q6P1X5	1085	49	16792	2.52678	1	0.49268	49.343
GOTERM_BP_DIRECT	GO:0002223~stimulatory C-type lectin receptor signaling pathway	13	1.13736	0.0380084	Q8N5C8, P25789, Q09472, P25963, Q92793, P19838, P28074, P0CG48, Q01201, P63208, Q04206, P60900, Q9Y6K9	1085	105	16792	1.91614	1	0.503121	50.5795
GOTERM_BP_DIRECT	GO:0061158~3'-UTR-mediated mRNA destabilization	4	0.349956	0.0380481	Q96PU8, Q5TC82, Q92945, Q92900	1085	12	16792	5.15883	1	0.501587	50.6165
GOTERM_BP_DIRECT	GO:0048596~embryonic camera-type eye morphogenesis	4	0.349956	0.0380481	P37275, P26367, Q9H2X6, Q8NHM5	1085	12	16792	5.15883	1	0.501587	50.6165
GOTERM_BP_DIRECT	GO:0032211~negative regulation of telomere maintenance via telomerase	4	0.349956	0.0380481	Q9H0A0, P07910, P09651, P29590	1085	12	16792	5.15883	1	0.501587	50.6165
GOTERM_BP_DIRECT	GO:0001654~eye development	6	0.524934	0.0411754	P48431, P26367, Q9H2X6, P09429, Q12948, Q9Y467	1085	30	16792	3.0953	1	0.527954	53.4565
GOTERM_BP_DIRECT	GO:0048706~embryonic skeletal system development	6	0.524934	0.0411754	P23759, Q05BQ5, O75398, P17482, O15178, P40424	1085	30	16792	3.0953	1	0.527954	53.4565
GOTERM_BP_DIRECT	GO:0002474~antigen processing and presentation of peptide antigen via MHC class I	6	0.524934	0.0411754	O95487, P30101, P55735, P27824, P51572, O95486	1085	30	16792	3.0953	1	0.527954	53.4565
GOTERM_BP_DIRECT	GO:0048208~COPII vesicle coating	9	0.787402	0.041496	O95487, Q96Q05, P55735, O15027, Q9UPN7, O43617, Q5H9R7, O15084, O95486	1085	61	16792	2.28342	1	0.528841	53.7387
GOTERM_BP_DIRECT	GO:0097150~neuronal stem cell population maintenance	5	0.437445	0.0428487	P48431, Q9BXP5, Q15154, Q9NZI8, Q15532	1085	21	16792	3.68488	1	0.538584	54.912
GOTERM_BP_DIRECT	GO:0045815~positive regulation of gene expression, epigenetic	9	0.787402	0.0450628	Q9UIG0, Q09472, P68431, Q92830, P20226, P60709, O00159, O60264, Q92831	1085	62	16792	2.24659	1	0.555143	56.7718
GOTERM_BP_DIRECT	GO:0060395~SMAD protein signal transduction	9	0.787402	0.0450628	Q96PK6, P05412, P12755, Q9H2X6, O15178, P41235, Q99717, P01100, P20823	1085	62	16792	2.24659	1	0.555143	56.7718
GOTERM_BP_DIRECT	GO:0006359~regulation of transcription from RNA polymerase III promoter	4	0.349956	0.0471489	P38398, Q9Y5Q9, P20226, P52747	1085	13	16792	4.762	1	0.569972	58.4575
GOTERM_BP_DIRECT	GO:0060334~regulation of interferon-gamma-mediated signaling pathway	4	0.349956	0.0471489	Q16543, P42224, P63165, O75925	1085	13	16792	4.762	1	0.569972	58.4575
GOTERM_BP_DIRECT	GO:0000460~maturation of 5.8S rRNA	4	0.349956	0.0471489	O95478, Q9Y4W2, Q9Y3B9, P56537	1085	13	16792	4.762	1	0.569972	58.4575
GOTERM_BP_DIRECT	GO:0007512~adult heart development	4	0.349956	0.0471489	Q14814, P35580, P52952, Q9P2D1	1085	13	16792	4.762	1	0.569972	58.4575
GOTERM_BP_DIRECT	GO:0043069~negative regulation of programmed cell death	4	0.349956	0.0471489	Q03112, P37198, P02768, Q02962	1085	13	16792	4.762	1	0.569972	58.4575
GOTERM_BP_DIRECT	GO:0000724~double-strand break repair via homologous recombination	10	0.874891	0.048099	Q9ULG1, Q9UBU8, Q92889, P38398, Q92878, P54132, O60934, P25490, Q8IY92, O94762	1085	74	16792	2.09142	1	0.575474	59.2045
GOTERM_BP_DIRECT	GO:0034097~response to cytokine	8	0.699913	0.0484792	P05412, Q01201, P42224, Q00653, P17535, P01100, P29590, Q04864	1085	52	16792	2.381	1	0.57649	59.4999
GOTERM_BP_DIRECT	GO:0030308~negative regulation of cell growth	14	1.22485	0.0484936	Q96EB6, P51531, P30153, P85037, P41235, P51532, P04637, P35232, P67775, P63244, P37231, Q9UK53, Q9H6I2, P29590	1085	121	16792	1.79067	1	0.574692	59.511
GOTERM_BP_DIRECT	GO:0006986~response to unfolded protein	7	0.612423	0.0512419	P34932, P34931, O95757, P10809, P54652, P50454, P17066	1085	42	16792	2.57942	1	0.593421	61.5861
GOTERM_BP_DIRECT	GO:1900034~regulation of cellular response to heat	10	0.874891	0.0516696	Q96EB6, P37198, P34931, Q09472, Q99567, Q02790, Q92793, Q7Z3B4, P35658, P52948	1085	75	16792	2.06353	1	0.594644	61.8999
GOTERM_BP_DIRECT	GO:0007623~circadian rhythm	10	0.874891	0.0516696	P05412, Q09472, O75376, P11387, O43390, O15379, P17535, Q13118, Q13886, P16220	1085	75	16792	2.06353	1	0.594644	61.8999
GOTERM_BP_DIRECT	GO:0006409~tRNA export from nucleus	6	0.524934	0.0523913	P37198, Q99567, O43592, Q7Z3B4, P35658, P52948	1085	32	16792	2.90184	1	0.597969	62.4238
GOTERM_BP_DIRECT	GO:0007259~JAK-STAT cascade	6	0.524934	0.0523913	P42224, P52630, P51692, Q14765, O75925, P40763	1085	32	16792	2.90184	1	0.597969	62.4238
GOTERM_BP_DIRECT	GO:1903799~negative regulation of production of miRNAs involved in gene silencing by miRNA	3	0.262467	0.0524737	P03372, Q9Y618, O75376	1085	6	16792	7.73825	1	0.596677	62.4832
GOTERM_BP_DIRECT	GO:0060762~regulation of branching involved in mammary gland duct morphogenesis	3	0.262467	0.0524737	P41161, Q99623, P43268	1085	6	16792	7.73825	1	0.596677	62.4832
GOTERM_BP_DIRECT	GO:0072307~regulation of metanephric nephron tubule epithelial cell differentiation	3	0.262467	0.0524737	Q06710, P46937, Q02962	1085	6	16792	7.73825	1	0.596677	62.4832
GOTERM_BP_DIRECT	GO:0098532~histone H3-K27 trimethylation	3	0.262467	0.0524737	P10412, Q8TDI0, Q5T5X7	1085	6	16792	7.73825	1	0.596677	62.4832
GOTERM_BP_DIRECT	GO:0051574~positive regulation of histone H3-K9 methylation	3	0.262467	0.0524737	Q96EB6, P38398, P10242	1085	6	16792	7.73825	1	0.596677	62.4832
GOTERM_BP_DIRECT	GO:0042797~tRNA transcription from RNA polymerase III promoter	3	0.262467	0.0524737	Q9Y5Q9, Q12789, Q8WUA4	1085	6	16792	7.73825	1	0.596677	62.4832
GOTERM_BP_DIRECT	GO:0048667~cell morphogenesis involved in neuron differentiation	3	0.262467	0.0524737	P06400, Q06413, Q9C0B0	1085	6	16792	7.73825	1	0.596677	62.4832
GOTERM_BP_DIRECT	GO:0048341~paraxial mesoderm formation	3	0.262467	0.0524737	Q96A65, Q12948, P20823	1085	6	16792	7.73825	1	0.596677	62.4832
GOTERM_BP_DIRECT	GO:0010742~macrophage derived foam cell differentiation	3	0.262467	0.0524737	P42224, Q09472, P37231	1085	6	16792	7.73825	1	0.596677	62.4832
GOTERM_BP_DIRECT	GO:0042791~5S class rRNA transcription from RNA polymerase III type 1 promoter	3	0.262467	0.0524737	Q9Y5Q9, Q12789, Q8WUA4	1085	6	16792	7.73825	1	0.596677	62.4832
GOTERM_BP_DIRECT	GO:0060430~lung saccule development	3	0.262467	0.0524737	Q8IXJ9, Q92908, P16220	1085	6	16792	7.73825	1	0.596677	62.4832
GOTERM_BP_DIRECT	GO:0042255~ribosome assembly	3	0.262467	0.0524737	Q9Y221, Q14692, P06748	1085	6	16792	7.73825	1	0.596677	62.4832
GOTERM_BP_DIRECT	GO:0021517~ventral spinal cord development	3	0.262467	0.0524737	P10070, P48742, Q9H334	1085	6	16792	7.73825	1	0.596677	62.4832
GOTERM_BP_DIRECT	GO:0010216~maintenance of DNA methylation	3	0.262467	0.0524737	Q9NRZ9, P49711, Q93009	1085	6	16792	7.73825	1	0.596677	62.4832
GOTERM_BP_DIRECT	GO:0010606~positive regulation of cytoplasmic mRNA processing body assembly	3	0.262467	0.0524737	A5YKK6, Q9NZN8, Q58A45	1085	6	16792	7.73825	1	0.596677	62.4832
GOTERM_BP_DIRECT	GO:0048665~neuron fate specification	4	0.349956	0.0572114	Q99581, Q96KQ7, O43711, P55317	1085	14	16792	4.42186	1	0.627455	65.7525
GOTERM_BP_DIRECT	GO:0060065~uterus development	4	0.349956	0.0572114	P03372, P23771, P48742, P31260	1085	14	16792	4.42186	1	0.627455	65.7525
GOTERM_BP_DIRECT	GO:1903146~regulation of mitophagy	6	0.524934	0.0586024	P19784, P46779, Q92830, Q9Y2W2, O96019, P21796	1085	33	16792	2.81391	1	0.634689	66.6599
GOTERM_BP_DIRECT	GO:0001501~skeletal system development	15	1.31234	0.0590548	P10070, Q08117, Q9UHF7, Q9UMX1, Q05925, P63173, P48436, Q13118, P56179, Q06945, P78337, Q12948, P61964, P31260, Q9P2D1	1085	137	16792	1.69451	1	0.635743	66.9501
GOTERM_BP_DIRECT	GO:0038061~NIK/NF-kappaB signaling	9	0.787402	0.0613086	P28074, P25789, Q01201, P0CG48, Q00653, P63208, P19838, P60900, Q04864	1085	66	16792	2.11043	1	0.648099	68.3607
GOTERM_BP_DIRECT	GO:0043066~negative regulation of apoptotic process	39	3.41207	0.0614136	Q92908, O15379, P62753, P15976, P23528, P14625, P51617, Q8TCU4, P51692, Q9UBR4, P68032, P48436, P01106, P52952, P56693, Q99623, Q96EB6, P23759, P10071, P10070, Q96ST3, P02768, P25963, Q13501, P19838, Q9HBM6, P06748, P04637, P37198, P0CG48, P10809, Q04206, Q92614, Q969G2, Q16594, Q02962, O75925, P40763, Q9UIU6	1085	455	16792	1.32656	1	0.646906	68.425
GOTERM_BP_DIRECT	GO:0090102~cochlea development	5	0.437445	0.0653895	A7XYQ1, P23771, P20248, Q02962, P23769	1085	24	16792	3.22427	1	0.668862	70.7713
GOTERM_BP_DIRECT	GO:0030099~myeloid cell differentiation	5	0.437445	0.0653895	Q02556, Q14686, Q6N021, Q9H7Z6, P29590	1085	24	16792	3.22427	1	0.668862	70.7713
GOTERM_BP_DIRECT	GO:0007219~Notch signaling pathway	13	1.13736	0.0674871	P0CG48, Q09472, Q13573, Q96T58, P48436, P55317, Q06330, Q92793, P35680, P01106, Q12948, Q92831, Q92585	1085	115	16792	1.74952	1	0.678992	71.9417
GOTERM_BP_DIRECT	GO:0032870~cellular response to hormone stimulus	7	0.612423	0.0677562	P05412, P51692, Q15596, P17535, P01100, Q15788, P40763	1085	45	16792	2.40746	1	0.678694	72.0886
GOTERM_BP_DIRECT	GO:0006342~chromatin silencing	7	0.612423	0.0677562	Q96EB6, P0C0S5, O14686, Q9UBU8, Q15014, Q9UQL6, Q96QV6	1085	45	16792	2.40746	1	0.678694	72.0886
GOTERM_BP_DIRECT	GO:0006301~postreplication repair	4	0.349956	0.0681947	P38398, Q9C0J8, Q9Y253, Q9NS91	1085	15	16792	4.12707	1	0.67934	72.3265
GOTERM_BP_DIRECT	GO:0007095~mitotic G2 DNA damage checkpoint	4	0.349956	0.0681947	Q9BQI6, P54132, O60934, P20248	1085	15	16792	4.12707	1	0.67934	72.3265
GOTERM_BP_DIRECT	GO:0051974~negative regulation of telomerase activity	4	0.349956	0.0681947	P04637, Q96EZ8, P37231, P29590	1085	15	16792	4.12707	1	0.67934	72.3265
GOTERM_BP_DIRECT	GO:0042692~muscle cell differentiation	4	0.349956	0.0681947	Q96PU8, Q6STE5, P54198, Q9Y294	1085	15	16792	4.12707	1	0.67934	72.3265
GOTERM_BP_DIRECT	GO:0042026~protein refolding	4	0.349956	0.0681947	P34931, P10809, P54652, P17066	1085	15	16792	4.12707	1	0.67934	72.3265
GOTERM_BP_DIRECT	GO:0014898~cardiac muscle hypertrophy in response to stress	4	0.349956	0.0681947	Q06413, Q9UIH9, Q92908, P16615	1085	15	16792	4.12707	1	0.67934	72.3265
GOTERM_BP_DIRECT	GO:2000679~positive regulation of transcription regulatory region DNA binding	4	0.349956	0.0681947	P06400, O43474, P23771, Q92830	1085	15	16792	4.12707	1	0.67934	72.3265
GOTERM_BP_DIRECT	GO:2000617~positive regulation of histone H3-K9 acetylation	3	0.262467	0.0703782	P23771, P38398, Q12824	1085	7	16792	6.63278	1	0.689453	73.4825
GOTERM_BP_DIRECT	GO:0035280~miRNA loading onto RISC involved in gene silencing by miRNA	3	0.262467	0.0703782	Q9H9G7, Q9UL18, Q9UKV8	1085	7	16792	6.63278	1	0.689453	73.4825
GOTERM_BP_DIRECT	GO:0021520~spinal cord motor neuron cell fate specification	3	0.262467	0.0703782	Q96A47, Q9UBR4, P50219	1085	7	16792	6.63278	1	0.689453	73.4825
GOTERM_BP_DIRECT	GO:0060992~response to fungicide	3	0.262467	0.0703782	Q96KQ7, Q9H9B1, O60341	1085	7	16792	6.63278	1	0.689453	73.4825
GOTERM_BP_DIRECT	GO:0035357~peroxisome proliferator activated receptor signaling pathway	3	0.262467	0.0703782	P19793, O43707, P37231	1085	7	16792	6.63278	1	0.689453	73.4825
GOTERM_BP_DIRECT	GO:0007270~neuron-neuron synaptic transmission	3	0.262467	0.0703782	Q8NFD5, Q9NZR1, P21796	1085	7	16792	6.63278	1	0.689453	73.4825
GOTERM_BP_DIRECT	GO:0034720~histone H3-K4 demethylation	3	0.262467	0.0703782	P29375, Q8NB78, O60341	1085	7	16792	6.63278	1	0.689453	73.4825
GOTERM_BP_DIRECT	GO:0003337~mesenchymal to epithelial transition involved in metanephros morphogenesis	3	0.262467	0.0703782	Q06710, Q9NSC2, Q02962	1085	7	16792	6.63278	1	0.689453	73.4825
GOTERM_BP_DIRECT	GO:0035264~multicellular organism growth	10	0.874891	0.0720955	Q6Y7W6, Q7Z6E9, O15550, Q02086, P46100, Q9BZK7, Q92830, P20719, Q05925, Q14865	1085	80	16792	1.93456	1	0.696759	74.3595
GOTERM_BP_DIRECT	GO:0048565~digestive tract development	6	0.524934	0.072227	P06400, Q9HCK8, P23771, Q9UHF7, P15976, P23769	1085	35	16792	2.65311	1	0.695691	74.4255
GOTERM_BP_DIRECT	GO:0048666~neuron development	7	0.612423	0.0738723	Q96A47, P12755, Q06413, P10070, Q9NZR4, Q05925, O95551	1085	46	16792	2.35512	1	0.702406	75.238
GOTERM_BP_DIRECT	GO:0003151~outflow tract morphogenesis	7	0.612423	0.0738723	O95487, P05412, Q06413, Q6KC79, P52952, Q06330, Q9H6I2	1085	46	16792	2.35512	1	0.702406	75.238
GOTERM_BP_DIRECT	GO:0051090~regulation of sequence-specific DNA binding transcription factor activity	5	0.437445	0.0740363	P05412, P49848, Q9Y6J9, P01100, Q93009	1085	25	16792	3.0953	1	0.701507	75.3176
GOTERM_BP_DIRECT	GO:0070423~nucleotide-binding oligomerization domain containing signaling pathway	5	0.437445	0.0740363	Q8N5C8, P0CG48, P51617, Q9Y6K9, Q9NQC7	1085	25	16792	3.0953	1	0.701507	75.3176
GOTERM_BP_DIRECT	GO:0060041~retina development in camera-type eye	8	0.699913	0.0785588	P35580, P12755, Q9H0D6, P26367, P61244, P48436, Q9P2D1, P50458	1085	58	16792	2.13469	1	0.721918	77.4206
GOTERM_BP_DIRECT	GO:0007017~microtubule-based process	6	0.524934	0.0796339	P07437, Q96FJ2, Q71U36, P61758, P63167, P68371	1085	36	16792	2.57942	1	0.725266	77.895
GOTERM_BP_DIRECT	GO:0048536~spleen development	6	0.524934	0.0796339	Q00653, Q5TC82, Q6N021, P52952, P40424, Q03164	1085	36	16792	2.57942	1	0.725266	77.895
GOTERM_BP_DIRECT	GO:0000723~telomere maintenance	6	0.524934	0.0796339	Q92889, Q92878, P12956, P13010, O60934, Q92900	1085	36	16792	2.57942	1	0.725266	77.895
GOTERM_BP_DIRECT	GO:0048593~camera-type eye morphogenesis	4	0.349956	0.0800511	P12755, P10071, P25490, Q06587	1085	16	16792	3.86912	1	0.725522	78.0766
GOTERM_BP_DIRECT	GO:0030518~intracellular steroid hormone receptor signaling pathway	4	0.349956	0.0800511	Q9NVC6, Q9NPJ6, P03372, O75448	1085	16	16792	3.86912	1	0.725522	78.0766
GOTERM_BP_DIRECT	GO:0002053~positive regulation of mesenchymal cell proliferation	5	0.437445	0.0832292	P42224, O15409, P48436, P01106, Q9H334	1085	26	16792	2.97625	1	0.738203	79.414
GOTERM_BP_DIRECT	GO:0000732~strand displacement	5	0.437445	0.0832292	P38398, Q92878, P54132, O60934, Q92993	1085	26	16792	2.97625	1	0.738203	79.414
GOTERM_BP_DIRECT	GO:0031018~endocrine pancreas development	5	0.437445	0.0832292	P48436, P35680, Q06945, P50219, P20823	1085	26	16792	2.97625	1	0.738203	79.414
GOTERM_BP_DIRECT	GO:0006336~DNA replication-independent nucleosome assembly	5	0.437445	0.0832292	Q9NPG3, P54198, Q9Y294, P46100, Q9Y6J0	1085	26	16792	2.97625	1	0.738203	79.414
GOTERM_BP_DIRECT	GO:0006936~muscle contraction	12	1.04987	0.0843696	Q9NYL9, P19105, P09493, P0DP24, P06753, P60660, Q13884, P67936, Q9NZR1, P50402, P14649, Q86U42	1085	107	16792	1.73568	1	0.741544	79.8748
GOTERM_BP_DIRECT	GO:0071407~cellular response to organic cyclic compound	8	0.699913	0.0844311	Q9UBB5, P42224, P10070, P25963, Q13887, Q99717, P51610, P40763	1085	59	16792	2.09851	1	0.740179	79.8994
GOTERM_BP_DIRECT	GO:0009612~response to mechanical stimulus	8	0.699913	0.0844311	Q9UBB5, P05412, P42224, P43694, P10070, P14921, P17535, P37231	1085	59	16792	2.09851	1	0.740179	79.8994
GOTERM_BP_DIRECT	GO:0042493~response to drug	27	2.3622	0.0870362	Q9UM54, P42224, Q92908, P11387, P68032, P17535, P01106, P37231, Q15532, Q9UHB9, P05023, P01100, P43694, P13010, P35680, P28288, P16220, O76094, P05412, P23771, P10809, Q9UQL6, P26583, O00763, P40939, Q04206, P40763	1085	304	16792	1.37456	1	0.74964	80.9146
GOTERM_BP_DIRECT	GO:0007605~sensory perception of sound	14	1.22485	0.0882216	Q9UM54, P62072, O95677, O60907, Q6KC79, Q9Y5L4, P63173, A7XYQ1, Q7Z406, Q9Y5J7, Q8TCU4, Q9Y5J9, O75083, Q9P2D1	1085	133	16792	1.62911	1	0.752945	81.3603
GOTERM_BP_DIRECT	GO:0003139~secondary heart field specification	3	0.262467	0.0899203	Q06413, Q6STE5, Q06330	1085	8	16792	5.80369	1	0.758245	81.982
GOTERM_BP_DIRECT	GO:0016584~nucleosome positioning	3	0.262467	0.0899203	P10412, P49711, O60264	1085	8	16792	5.80369	1	0.758245	81.982
GOTERM_BP_DIRECT	GO:0000288~nuclear-transcribed mRNA catabolic process, deadenylation-dependent decay	3	0.262467	0.0899203	O75175, Q5TC82, Q9NZN8	1085	8	16792	5.80369	1	0.758245	81.982
GOTERM_BP_DIRECT	GO:0060231~mesenchymal to epithelial transition	3	0.262467	0.0899203	P80723, P23771, Q02962	1085	8	16792	5.80369	1	0.758245	81.982
GOTERM_BP_DIRECT	GO:0030850~prostate gland development	3	0.262467	0.0899203	Q02790, P48436, Q92922	1085	8	16792	5.80369	1	0.758245	81.982
GOTERM_BP_DIRECT	GO:0035196~production of miRNAs involved in gene silencing by miRNA	3	0.262467	0.0899203	Q9H9G7, Q9UL18, Q9UKV8	1085	8	16792	5.80369	1	0.758245	81.982
GOTERM_BP_DIRECT	GO:0051983~regulation of chromosome segregation	3	0.262467	0.0899203	Q8TB72, Q14671, P46013	1085	8	16792	5.80369	1	0.758245	81.982
GOTERM_BP_DIRECT	GO:0045654~positive regulation of megakaryocyte differentiation	3	0.262467	0.0899203	P26583, O60341, P23769	1085	8	16792	5.80369	1	0.758245	81.982
GOTERM_BP_DIRECT	GO:0075713~establishment of integrated proviral latency	3	0.262467	0.0899203	P62937, P12956, P13010	1085	8	16792	5.80369	1	0.758245	81.982
GOTERM_BP_DIRECT	GO:0072075~metanephric mesenchyme development	3	0.262467	0.0899203	P80723, Q02962, Q9UIU6	1085	8	16792	5.80369	1	0.758245	81.982
GOTERM_BP_DIRECT	GO:0048708~astrocyte differentiation	3	0.262467	0.0899203	P26367, P35712, P40763	1085	8	16792	5.80369	1	0.758245	81.982
GOTERM_BP_DIRECT	GO:0007249~I-kappaB kinase/NF-kappaB signaling	8	0.699913	0.0905475	Q8NFZ5, Q8N5C8, Q01201, P0CG48, Q00653, P19838, Q9Y6K9, Q04864	1085	60	16792	2.06353	1	0.759176	82.2065
GOTERM_BP_DIRECT	GO:0048568~embryonic organ development	4	0.349956	0.0927282	Q7Z6E9, Q9UBB5, P10071, Q8WW38	1085	17	16792	3.64153	1	0.766147	82.9667
GOTERM_BP_DIRECT	GO:0042789~mRNA transcription from RNA polymerase II promoter	4	0.349956	0.0927282	P27540, Q9Y2K1, Q9H6I2, P40763	1085	17	16792	3.64153	1	0.766147	82.9667
GOTERM_BP_DIRECT	GO:0030224~monocyte differentiation	4	0.349956	0.0927282	P05412, Q06413, P37231, P35579	1085	17	16792	3.64153	1	0.766147	82.9667
GOTERM_BP_DIRECT	GO:0044849~estrous cycle	4	0.349956	0.0927282	Q9Y618, Q9H2P0, P14921, Q15788	1085	17	16792	3.64153	1	0.766147	82.9667
GOTERM_BP_DIRECT	GO:0002076~osteoblast development	4	0.349956	0.0927282	Q9UPW6, P10070, P17535, Q9UGP4	1085	17	16792	3.64153	1	0.766147	82.9667
GOTERM_BP_DIRECT	GO:0009948~anterior/posterior axis specification	4	0.349956	0.0927282	Q86U70, P12755, P48742, Q99496	1085	17	16792	3.64153	1	0.766147	82.9667
GOTERM_BP_DIRECT	GO:0031032~actomyosin structure organization	5	0.437445	0.0929518	P35580, Q7Z406, Q92614, P68032, P35579	1085	27	16792	2.86602	1	0.765465	83.0429
GOTERM_BP_DIRECT	GO:0015721~bile acid and bile salt transport	5	0.437445	0.0929518	P19793, P02768, Q15596, P20823, Q15788	1085	27	16792	2.86602	1	0.765465	83.0429
GOTERM_BP_DIRECT	GO:0006891~intra-Golgi vesicle-mediated transport	5	0.437445	0.0929518	P53621, Q13948, P35606, P39880, O14579, P53618	1085	27	16792	2.86602	1	0.765465	83.0429
GOTERM_BP_DIRECT	GO:0042981~regulation of apoptotic process	20	1.74978	0.0953207	P42224, P49756, P14921, Q8TAQ5, Q92793, O75030, Q9UKT9, P04637, P03372, Q9Y5V3, P35232, P38398, Q96KQ4, Q06710, P48436, O15164, O43707, O76021, Q13114, P98175	1085	213	16792	1.45319	1	0.772889	83.8306
GOTERM_BP_DIRECT	GO:0009790~embryo development	6	0.524934	0.0956082	Q9H0H5, Q9UPT9, Q12951, Q9H9B1, P25705, Q9Y5P3	1085	38	16792	2.44366	1	0.772442	83.9238
GOTERM_BP_DIRECT	GO:0030049~muscle filament sliding	6	0.524934	0.0956082	P09493, P06753, P60660, P68032, P67936, P14649	1085	38	16792	2.44366	1	0.772442	83.9238
GOTERM_BP_DIRECT	GO:0016055~Wnt signaling pathway	18	1.5748	0.0967269	P19784, Q86U70, Q9Y3Y4, P36402, Q9NPI1, Q08117, P67870, Q86T24, Q9UGU5, P0CG48, Q04726, Q04727, Q9BRQ0, Q04724, Q9BQE9, P63208, Q9NQC7, Q9NQB0	1085	187	16792	1.48972	1	0.775054	84.2817

## Sheet: NFIs
Category	Term	Count	%	PValue	Genes	List Total	Pop Hits	Pop Total	Fold Enrichment	Bonferroni	Benjamini	FDR
GOTERM_BP_DIRECT	GO:0006351~transcription, DNA-templated	112	58.9474	7.13438e-15	P54253, P51531, P25440, Q7Z589, Q92925, Q08117, Q6ZW49, Q12830, Q96RK0, Q8IVH2, Q9Y6Q9, Q8IYH5, Q6STE5, Q92922, Q9UKL0, O14593, Q8WUA4, Q9Y4A5, Q6W2J9, Q12824, O75362, Q8N488, O60907, P39880, Q15291, Q8IX15, Q96EZ8, Q9P0W2, Q6MZP7, O60315, Q15723, Q96ME7, O00712, Q9H334, Q8NHM5, Q12857, Q9NP66, Q8IU81, P17482, Q6NUN9, Q15596, Q8NFD5, Q86UP3, O15090, P0C7T5, Q96JM7, Q12789, Q86U86, Q8NEZ4, Q15906,…	181	388	1085	1.73036	5.7625e-12	5.7625e-12	1.09246e-11
GOTERM_BP_DIRECT	GO:0000122~negative regulation of transcription from RNA polymerase II promoter	62	32.6316	6.25857e-10	P51531, Q06546, Q08117, Q12830, Q96RK0, Q9P2K3, Q04724, Q9H0E3, Q92766, P55317, Q9Y2X9, P08651, Q96QT6, Q9UKL0, Q9NQB0, Q6W2J9, O75461, Q9UKY1, Q9UPW6, P15822, O75362, Q8N488, P22626, Q96T58, O60907, P39880, Q9NPF5, Q9UI36, Q5PSV4, Q9Y6X8, Q8IX15, Q15911, O60315, O00712, O14497, Q9H334, Q8NHM5, P37275, Q12857, Q9NP66, O75376, Q6NUN9, Q13948, Q15596, Q92793, Q9UHF7, O15090, P0C7T5, Q96KQ7, Q9BZK7,…	181	184	1085	2.01988	5.0757e-07	2.53785e-07	9.62416e-07
GOTERM_BP_DIRECT	GO:0016569~covalent chromatin modification	24	12.6316	4.6344e-08	P25440, Q7Z589, Q68CP9, Q9UPW6, Q9NP66, Q92925, Q8TAQ2, Q12824, O75376, Q96GM5, Q8NFD5, Q969R5, Q12830, O60264, Q9NXR8, Q6STE5, Q96JM7, Q86U86, Q8IXM2, Q969G3, P55317, Q92922, Q15906, O14497	181	45	1085	3.19705	3.75843e-05	1.25283e-05	7.12659e-05
GOTERM_BP_DIRECT	GO:0051568~histone H3-K4 methylation	11	5.78947	6.17632e-07	Q9C005, O15550, O14686, Q9UBL3, Q8NEZ4, Q6ZW49, Q9UMN6, Q15291, Q03164, O15047, Q9P0U4	181	12	1085	5.49494	0.000500774	0.000125217	0.000949764
GOTERM_BP_DIRECT	GO:0006337~nucleosome disassembly	9	4.73684	1.6664e-05	Q68CP9, Q6STE5, Q12824, Q8TAQ2, Q92925, Q969G3, Q92922, Q96GM5, O14497	181	10	1085	5.39503	0.0134237	0.00269928	0.0256221
GOTERM_BP_DIRECT	GO:0006355~regulation of transcription, DNA-templated	64	33.6842	2.31771e-05	Q86U70, P51531, Q969J2, Q7Z589, Q9UBL3, Q12830, Q9Y5A6, Q9Y6Q9, Q8IYH5, Q96K83, Q04726, Q9H582, Q04724, Q9H0E3, Q92766, Q12948, Q9Y4A5, O95619, Q9UPW6, O75362, Q92830, Q15291, Q969R5, Q6P4R8, Q96EZ8, O14686, Q15911, P52739, Q9P0W2, Q9H2Z4, Q6MZP7, Q96ME7, Q9UIU6, Q12857, Q9NP66, Q9BSM1, Q68CP9, Q8IU81, Q6NUN9, Q15596, Q92793, O15047, Q86UP3, Q8WUU5, Q4LE39, Q96JM7, Q8NEZ4, Q86U86, Q8IWI9, Q15542,…	181	246	1085	1.55954	0.0186213	0.0031279	0.0356348
GOTERM_BP_DIRECT	GO:0006357~regulation of transcription from RNA polymerase II promoter	35	18.4211	0.000291159	P37275, P51531, P25440, Q9NPI1, Q92925, Q13948, Q96GM5, P52747, Q8IVH2, Q4LE39, O00268, Q6STE5, Q92922, Q6PJG2, P48382, Q6ZRS2, O14593, Q9NQB0, Q5VZL5, Q9UPW6, Q96RN5, Q12824, Q8TAQ2, Q92830, P39880, P25490, O60264, O60216, P52739, Q01167, Q969G3, Q15723, Q14186, P50219, Q9H334, O14497	181	118	1085	1.77802	0.210349	0.033175	0.446796
GOTERM_BP_DIRECT	GO:0045892~negative regulation of transcription, DNA-templated	35	18.4211	0.000417323	P37275, P54253, Q86U70, P51531, Q9NPI1, Q6NUN9, Q08117, Q04724, P48436, Q9Y2X9, Q96QT6, Q9UKL0, Q9NQB0, Q6W2J9, Q9UKY1, Q8TAQ2, O75362, Q96T58, P14859, Q6KC79, Q9NPF5, Q01664, Q9UI36, Q9Y6X8, Q15911, Q9UQR1, Q9H9B1, Q9NSC2, Q969G3, Q15723, O15164, Q4VC05, Q06587, Q9H334, Q9UIU6	181	120	1085	1.74839	0.287175	0.0414322	0.63982
GOTERM_BP_DIRECT	GO:0007064~mitotic sister chromatid cohesion	6	3.15789	0.000622362	O60216, Q14683, Q29RF7, Q6KC79, Q9UQE7, Q7Z3K3	181	6	1085	5.99448	0.39643	0.0545546	0.952771
GOTERM_BP_DIRECT	GO:0006338~chromatin remodeling	18	9.47368	0.000716897	P51531, Q9UPW6, Q92925, Q8TAQ2, Q12824, Q92830, Q96GM5, Q8NFD5, Q9NPF5, Q12830, O60264, Q6STE5, Q86U86, P48436, Q969G3, P55317, Q92922, O14497	181	47	1085	2.29576	0.441003	0.0565021	1.09675
GOTERM_BP_DIRECT	GO:1904837~beta-catenin-TCF complex assembly	10	5.26316	0.000979081	O14686, O00512, Q9UBL3, Q04726, Q09472, Q04724, Q92793, Q15291, Q9Y4A5, Q9NQB0	181	18	1085	3.33026	0.548158	0.0696741	1.49504
GOTERM_BP_DIRECT	GO:0006366~transcription from RNA polymerase II promoter	37	19.4737	0.00182859	Q8IVW6, Q86U70, Q9UBL3, Q12857, Q06546, O75376, Q9UHF7, P52747, Q9Y5A6, O00268, P48436, P55317, Q92766, P08651, Q12948, Q15542, P49848, Q99856, Q09472, P15822, Q9BWW4, P32519, Q92830, P35711, Q01664, Q03164, Q6P4R8, Q15911, Q14938, O60216, Q9UQR1, Q16514, Q01167, P10244, O15164, O00712, Q9UIU6	181	139	1085	1.59565	0.773349	0.116351	2.77526
GOTERM_BP_DIRECT	GO:0045944~positive regulation of transcription from RNA polymerase II promoter	53	27.8947	0.00517376	Q86U70, P51531, Q9UBL3, Q06546, Q9Y5A6, Q9Y6Q9, P55317, Q92922, P08651, Q12948, Q9NQB0, O14593, Q9UPW6, Q12824, Q9BWW4, O60907, Q03164, Q9BTK6, O14686, O60216, O60315, Q6N021, O00712, Q9H334, Q9UIU6, P37275, Q8IVW6, O00512, Q12857, P17482, Q15596, Q6NUN9, Q9UHF7, Q92793, Q4LE39, O00268, P48436, Q9BZK7, Q92585, Q99856, Q09472, P49116, P32519, Q6KC79, P25490, Q01664, Q14938, Q9UQR1, Q9NSC2, P10244,…	181	231	1085	1.37536	0.985106	0.276461	7.6668
GOTERM_BP_DIRECT	GO:0043044~ATP-dependent chromatin remodeling	8	4.21053	0.00606385	P07910, Q12824, Q8TAQ2, Q92925, Q969G3, Q92922, O60264, O14497	181	15	1085	3.19705	0.992793	0.296958	8.92903
GOTERM_BP_DIRECT	GO:0044255~cellular lipid metabolic process	7	3.68421	0.0118793	Q9Y618, Q6STE5, O75376, Q9BZK7, Q15596, O60907, Q92793	181	13	1085	3.22779	0.999938	0.475925	16.7872
GOTERM_BP_DIRECT	GO:0007219~Notch signaling pathway	7	3.68421	0.0118793	Q09472, Q96T58, P48436, P55317, Q92793, Q12948, Q92585	181	13	1085	3.22779	0.999938	0.475925	16.7872
GOTERM_BP_DIRECT	GO:0035518~histone H2A monoubiquitination	5	2.63158	0.0170036	Q6W2J9, Q9BSM1, Q8N488, Q06587, Q8NHM5	181	7	1085	4.28177	0.999999	0.580748	23.1814
GOTERM_BP_DIRECT	GO:0007399~nervous system development	9	4.73684	0.0192904	P51531, Q09472, Q12824, P49116, Q92782, Q92922, O60315, Q96GM5, Q8NFD5	181	22	1085	2.45229	1	0.605154	25.884
GOTERM_BP_DIRECT	GO:0006383~transcription from RNA polymerase III promoter	4	2.10526	0.0346967	Q9Y5Q9, Q12789, P52747, Q8WUA4	181	5	1085	4.79558	1	0.796287	41.9013
GOTERM_BP_DIRECT	GO:0048096~chromatin-mediated maintenance of transcription	4	2.10526	0.0346967	Q96GM5, Q9UMN6, Q8NFD5, O14497	181	5	1085	4.79558	1	0.796287	41.9013
GOTERM_BP_DIRECT	GO:0006461~protein complex assembly	6	3.15789	0.0348528	Q9UQR1, Q9BWW4, P48436, Q92793, Q01664, Q03164	181	12	1085	2.99724	1	0.780017	42.0456
GOTERM_BP_DIRECT	GO:0042791~5S class rRNA transcription from RNA polymerase III type 1 promoter	3	1.57895	0.073179	Q9Y5Q9, Q12789, Q8WUA4	181	3	1085	5.99448	1	0.954114	68.9203
GOTERM_BP_DIRECT	GO:0042797~tRNA transcription from RNA polymerase III promoter	3	1.57895	0.073179	Q9Y5Q9, Q12789, Q8WUA4	181	3	1085	5.99448	1	0.954114	68.9203

## Sheet: CPEB1
Category	Term	Count	%	PValue	Genes	List Total	Pop Hits	Pop Total	Fold Enrichment	Bonferroni	Benjamini	FDR
GOTERM_BP_DIRECT	GO:0000289~nuclear-transcribed mRNA poly(A) tail shortening	9	10.8434	2.19811e-09	Q9H9A5, O75175, A5YKK6, Q9UKZ1, Q9UIV1, Q9NZN8, Q92600, Q58A45, Q9UFF9	73	9	1085	14.863	6.24262e-07	6.24262e-07	2.91278e-06
GOTERM_BP_DIRECT	GO:0017148~negative regulation of translation	10	12.0482	2.33984e-08	O75175, Q6Y7W6, Q9Y6M1, A5YKK6, Q9NRA8, Q9NZN8, Q92600, P63244, Q9NZI8, O00425	73	14	1085	10.6164	6.64512e-06	3.32256e-06	3.10059e-05
GOTERM_BP_DIRECT	GO:0031047~gene silencing by RNA	10	12.0482	1.19966e-07	Q9H9A5, O75175, Q9UL18, Q9UPQ9, Q8NDV7, Q9UKZ1, Q9UIV1, Q9NZN8, Q9UKV8, Q92600	73	16	1085	9.28938	3.40697e-05	1.13567e-05	0.00015897
GOTERM_BP_DIRECT	GO:0043928~exonucleolytic nuclear-transcribed mRNA catabolic process involved in deadenylation-dependent decay	7	8.43373	4.63732e-07	Q9NPI6, Q96F86, Q6P2E9, Q9UIV1, Q86TB9, Q9UFF9, Q8IZD4	73	7	1085	14.863	0.000131691	3.29244e-05	0.000614503
GOTERM_BP_DIRECT	GO:0007223~Wnt signaling pathway, calcium modulating pathway	7	8.43373	1.75771e-06	Q9H9G7, Q9UL18, Q9UPQ9, Q8NDV7, Q9HCJ0, Q9UKV8, Q9HCE1	73	8	1085	13.0051	0.000499065	9.9833e-05	0.00232917
GOTERM_BP_DIRECT	GO:0048015~phosphatidylinositol-mediated signaling	7	8.43373	1.75771e-06	Q9H9G7, Q9UL18, Q9UPQ9, Q8NDV7, Q9HCJ0, Q9UKV8, Q9HCE1	73	8	1085	13.0051	0.000499065	9.9833e-05	0.00232917
GOTERM_BP_DIRECT	GO:0061014~positive regulation of mRNA catabolic process	7	8.43373	4.99686e-06	Q7Z2W4, A5YKK6, Q5TC82, Q9UIV1, O00178, Q92900, Q9UFF9	73	9	1085	11.5601	0.0014181	0.000236491	0.00662128
GOTERM_BP_DIRECT	GO:0035194~posttranscriptional gene silencing by RNA	6	7.22892	6.41216e-06	Q9H9G7, Q9UL18, Q9UPQ9, Q8NDV7, Q9HCJ0, Q9UKV8	73	6	1085	14.863	0.0018194	0.000260118	0.00849661
GOTERM_BP_DIRECT	GO:0033962~cytoplasmic mRNA processing body assembly	6	7.22892	2.12832e-05	Q99700, Q96F86, Q5TC82, Q9UIV1, Q86TB9, Q8ND56	73	7	1085	12.7397	0.00602627	0.000755278	0.0281994
GOTERM_BP_DIRECT	GO:0006977~DNA damage response, signal transduction by p53 class mediator resulting in cell cycle arrest	8	9.63855	4.83794e-05	Q9H9A5, O75175, A5YKK6, Q9UKZ1, Q9UIV1, Q9NZN8, Q92600, Q9UFF9	73	17	1085	6.99436	0.0136461	0.00152551	0.06409
GOTERM_BP_DIRECT	GO:0035195~gene silencing by miRNA	6	7.22892	5.38258e-05	A5YKK6, Q8NDV7, Q9HCJ0, Q9UIV1, Q9HCE1, Q9UFF9	73	8	1085	11.1473	0.0151707	0.00152753	0.0713026
GOTERM_BP_DIRECT	GO:0043488~regulation of mRNA stability	7	8.43373	8.23274e-05	Q15717, Q8TB72, Q9NPI6, Q8IZH2, Q14671, Q5TC82, Q9Y5A9	73	13	1085	8.00316	0.0231107	0.00212337	0.109039
GOTERM_BP_DIRECT	GO:1900153~positive regulation of nuclear-transcribed mRNA catabolic process, deadenylation-dependent decay	5	6.0241	8.50685e-05	A5YKK6, Q9UPQ9, Q9HCJ0, Q9UIV1, Q9UKV8	73	5	1085	14.863	0.023871	0.00201135	0.112668
GOTERM_BP_DIRECT	GO:0060213~positive regulation of nuclear-transcribed mRNA poly(A) tail shortening	5	6.0241	8.50685e-05	A5YKK6, Q9UPQ9, Q9HCJ0, Q9UIV1, Q9UKV8	73	5	1085	14.863	0.023871	0.00201135	0.112668
GOTERM_BP_DIRECT	GO:0000290~deadenylation-dependent decapping of nuclear-transcribed mRNA	5	6.0241	8.50685e-05	Q9NPI6, Q9UIV1, Q86TB9, Q58A45, Q8IZD4	73	5	1085	14.863	0.023871	0.00201135	0.112668
GOTERM_BP_DIRECT	GO:0035278~miRNA mediated inhibition of translation	6	7.22892	0.000114862	Q9H9G7, Q9UL18, Q9UPQ9, Q8NDV7, Q9HCJ0, Q9UKV8	73	9	1085	9.90868	0.0320963	0.00250629	0.1521
GOTERM_BP_DIRECT	GO:0090503~RNA phosphodiester bond hydrolysis, exonucleolytic	5	6.0241	0.000537178	A5YKK6, Q9UIV1, Q9NZN8, Q58A45, Q9UFF9	73	7	1085	10.6164	0.141527	0.0108408	0.709493
GOTERM_BP_DIRECT	GO:1900246~positive regulation of RIG-I signaling pathway	4	4.81928	0.00106998	Q8TB72, Q7Z2W4, O75179, Q14671	73	4	1085	14.863	0.262167	0.0200651	1.40861
GOTERM_BP_DIRECT	GO:0035279~mRNA cleavage involved in gene silencing by miRNA	4	4.81928	0.00106998	Q9H9G7, Q9UL18, Q9UKV8, Q9HCE1	73	4	1085	14.863	0.262167	0.0200651	1.40861
GOTERM_BP_DIRECT	GO:2000036~regulation of stem cell population maintenance	4	4.81928	0.00254735	O75175, Q15717, A5YKK6, Q9NZN8	73	5	1085	11.8904	0.515371	0.0442637	3.3234
GOTERM_BP_DIRECT	GO:0000956~nuclear-transcribed mRNA catabolic process	4	4.81928	0.00254735	Q8IZH2, Q9UL18, Q5TC82, Q92900	73	5	1085	11.8904	0.515371	0.0442637	3.3234
GOTERM_BP_DIRECT	GO:0006417~regulation of translation	5	6.0241	0.00276319	Q9H9A5, Q99700, Q9UKZ1, Q8ND56, Q9BX40	73	10	1085	7.43151	0.544259	0.0451732	3.60024
GOTERM_BP_DIRECT	GO:0035280~miRNA loading onto RISC involved in gene silencing by miRNA	3	3.61446	0.0124774	Q9H9G7, Q9UL18, Q9UKV8	73	3	1085	14.863	0.971728	0.179716	15.3277
GOTERM_BP_DIRECT	GO:0000288~nuclear-transcribed mRNA catabolic process, deadenylation-dependent decay	3	3.61446	0.0124774	O75175, Q5TC82, Q9NZN8	73	3	1085	14.863	0.971728	0.179716	15.3277
GOTERM_BP_DIRECT	GO:0031087~deadenylation-independent decapping of nuclear-transcribed mRNA	3	3.61446	0.0124774	Q9NPI6, Q96F86, Q8IZD4	73	3	1085	14.863	0.971728	0.179716	15.3277
GOTERM_BP_DIRECT	GO:0031054~pre-miRNA processing	3	3.61446	0.0124774	Q9H9G7, Q9UL18, Q9UKV8	73	3	1085	14.863	0.971728	0.179716	15.3277
GOTERM_BP_DIRECT	GO:0010606~positive regulation of cytoplasmic mRNA processing body assembly	3	3.61446	0.0124774	A5YKK6, Q9NZN8, Q58A45	73	3	1085	14.863	0.971728	0.179716	15.3277
GOTERM_BP_DIRECT	GO:0090625~mRNA cleavage involved in gene silencing by siRNA	3	3.61446	0.0124774	Q9H9G7, Q9UL18, Q9UKV8	73	3	1085	14.863	0.971728	0.179716	15.3277
GOTERM_BP_DIRECT	GO:0035196~production of miRNAs involved in gene silencing by miRNA	3	3.61446	0.0124774	Q9H9G7, Q9UL18, Q9UKV8	73	3	1085	14.863	0.971728	0.179716	15.3277
GOTERM_BP_DIRECT	GO:0042035~regulation of cytokine biosynthetic process	3	3.61446	0.0238848	Q9Y6M1, Q9NZI8, O00425	73	4	1085	11.1473	0.998957	0.303263	27.4102
GOTERM_BP_DIRECT	GO:0033147~negative regulation of intracellular estrogen receptor signaling pathway	3	3.61446	0.0381098	A5YKK6, Q9NZN8, Q92600	73	5	1085	8.91781	0.999984	0.424053	40.2427
GOTERM_BP_DIRECT	GO:0010608~posttranscriptional regulation of gene expression	3	3.61446	0.0381098	Q8TB72, Q14671, Q5TC82	73	5	1085	8.91781	0.999984	0.424053	40.2427
GOTERM_BP_DIRECT	GO:1901224~positive regulation of NIK/NF-kappaB signaling	3	3.61446	0.0381098	Q9H9G7, Q9UL18, Q5TC82	73	5	1085	8.91781	0.999984	0.424053	40.2427
GOTERM_BP_DIRECT	GO:0043123~positive regulation of I-kappaB kinase/NF-kappaB signaling	4	4.81928	0.0495244	Q7Z2W4, O75179, Q6P1N0, P51617	73	13	1085	4.57323	0.999999	0.496873	48.986
GOTERM_BP_DIRECT	GO:0010467~gene expression	4	4.81928	0.0495244	Q9Y6M1, P14866, Q9NZI8, O00425	73	13	1085	4.57323	0.999999	0.496873	48.986

## Sheet: FOS
Category	Term	Count	%	PValue	Genes	List Total	Pop Hits	Pop Total	Fold Enrichment	Bonferroni	Benjamini	FDR
GOTERM_BP_DIRECT	GO:0006337~nucleosome disassembly	10	10.101	1.60992e-09	Q68CP9, Q6STE5, Q12824, Q8TAQ2, Q92925, Q969G3, Q92922, Q96GM5, O14497, P51532	94	10	1085	11.5426	9.91713e-07	9.91713e-07	2.3863e-06
GOTERM_BP_DIRECT	GO:0007015~actin filament organization	7	7.07071	2.22259e-06	Q9NYL9, P09493, P06753, P67936, O43795, Q9NZR1, Q16643	94	7	1085	11.5426	0.00136818	0.000684323	0.00329436
GOTERM_BP_DIRECT	GO:0030048~actin filament-based movement	7	7.07071	2.22259e-06	Q9Y4I1, Q9UM54, P35580, Q7Z406, P68032, O43795, P35579	94	7	1085	11.5426	0.00136818	0.000684323	0.00329436
GOTERM_BP_DIRECT	GO:0006936~muscle contraction	8	8.08081	6.79589e-06	Q9NYL9, P19105, P09493, P06753, P60660, P67936, Q9NZR1, P14649	94	11	1085	8.39458	0.00417753	0.00139445	0.0100727
GOTERM_BP_DIRECT	GO:0030049~muscle filament sliding	6	6.06061	2.34109e-05	P09493, P06753, P60660, P68032, P67936, P14649	94	6	1085	11.5426	0.0143178	0.00359882	0.034695
GOTERM_BP_DIRECT	GO:0043044~ATP-dependent chromatin remodeling	8	8.08081	9.92839e-05	Q12824, Q8TAQ2, Q92925, Q969G3, P60709, Q92922, O14497, P51532	94	15	1085	6.15603	0.0593291	0.0121579	0.147062
GOTERM_BP_DIRECT	GO:0016569~covalent chromatin modification	13	13.1313	0.000208389	Q68CP9, Q92925, Q8TAQ2, Q12824, O75177, Q96GM5, Q8NFD5, P51532, Q6STE5, Q86U86, Q969G3, Q92922, O14497	94	45	1085	3.33452	0.120482	0.0211695	0.308438
GOTERM_BP_DIRECT	GO:0031032~actomyosin structure organization	5	5.05051	0.000237476	P35580, Q7Z406, Q92614, P68032, P35579	94	5	1085	11.5426	0.136104	0.0206835	0.35142
GOTERM_BP_DIRECT	GO:0007399~nervous system development	9	9.09091	0.000253721	P51531, Q12824, Q92782, Q92922, Q96GM5, Q8NFD5, Q9NZR1, P01100, P51532	94	22	1085	4.72195	0.144707	0.0193493	0.375417
GOTERM_BP_DIRECT	GO:0006928~movement of cell or subcellular component	6	6.06061	0.000742912	P09493, P06753, O15145, P60709, P67936, P61158	94	10	1085	6.92553	0.367328	0.049595	1.09554
GOTERM_BP_DIRECT	GO:0008360~regulation of cell shape	6	6.06061	0.00127016	P19105, P35580, P09493, Q7Z406, O75083, P35579	94	11	1085	6.29594	0.542928	0.0753052	1.86625
GOTERM_BP_DIRECT	GO:0006338~chromatin remodeling	12	12.1212	0.0013186	P51531, Q6STE5, Q12824, Q8TAQ2, Q92925, Q86U86, Q969G3, Q92922, Q96GM5, Q8NFD5, O14497, P51532	94	47	1085	2.94703	0.556383	0.0712264	1.93677
GOTERM_BP_DIRECT	GO:0048013~ephrin receptor signaling pathway	5	5.05051	0.00145124	P19105, O15145, P60709, P61158, Q15532	94	7	1085	8.24468	0.591234	0.0718399	2.12965
GOTERM_BP_DIRECT	GO:0051568~histone H3-K4 methylation	6	6.06061	0.0020308	O15550, O14686, Q9UBL3, Q8NEZ4, Q6ZW49, Q15291	94	12	1085	5.77128	0.714138	0.0918327	2.96826
GOTERM_BP_DIRECT	GO:1904837~beta-catenin-TCF complex assembly	7	7.07071	0.00269208	O14686, O00512, Q9UBL3, Q04724, Q92793, Q15291, P51532	94	18	1085	4.48877	0.809967	0.111847	3.91692
GOTERM_BP_DIRECT	GO:0038096~Fc-gamma receptor signaling pathway involved in phagocytosis	4	4.0404	0.00537504	O15145, P60709, O00159, P61158	94	5	1085	9.23404	0.963845	0.198548	7.67784
GOTERM_BP_DIRECT	GO:0042493~response to drug	8	8.08081	0.00578576	Q9UM54, P05412, O00763, P68032, P17535, Q15532, P05023, P01100	94	27	1085	3.42002	0.971967	0.200204	8.24132
GOTERM_BP_DIRECT	GO:0098609~cell-cell adhesion	8	8.08081	0.00718209	Q9UHB6, Q9NYL9, Q9UM54, Q01082, O43795, Q16643, Q6WCQ1, Q13813	94	28	1085	3.29787	0.988206	0.229861	10.1331
GOTERM_BP_DIRECT	GO:0007519~skeletal muscle tissue development	5	5.05051	0.0146583	Q7Z406, Q9Y281, P60660, O95425, P14649	94	12	1085	4.8094	0.999888	0.396708	19.6582
GOTERM_BP_DIRECT	GO:0007005~mitochondrion organization	4	4.0404	0.0165594	Q04837, P06576, P35232, Q99623	94	7	1085	6.59574	0.999966	0.418048	21.9254
GOTERM_BP_DIRECT	GO:0007010~cytoskeleton organization	6	6.06061	0.0183638	P09493, Q01082, O95425, P60709, P23528, Q13813	94	19	1085	3.64502	0.999989	0.434963	24.022
GOTERM_BP_DIRECT	GO:0051017~actin filament bundle assembly	3	3.0303	0.0206014	Q9UHB6, O43795, O43707	94	3	1085	11.5426	0.999997	0.456986	26.5491
GOTERM_BP_DIRECT	GO:0015991~ATP hydrolysis coupled proton transport	3	3.0303	0.0206014	P06576, P25705, P05023	94	3	1085	11.5426	0.999997	0.456986	26.5491
GOTERM_BP_DIRECT	GO:0070374~positive regulation of ERK1 and ERK2 cascade	3	3.0303	0.0389103	P05412, P35232, Q99623	94	4	1085	8.65691	1	0.670853	44.4711
GOTERM_BP_DIRECT	GO:0070527~platelet aggregation	3	3.0303	0.0389103	P19105, P60709, P35579	94	4	1085	8.65691	1	0.670853	44.4711
GOTERM_BP_DIRECT	GO:0048096~chromatin-mediated maintenance of transcription	3	3.0303	0.0612672	Q96GM5, Q8NFD5, O14497	94	5	1085	6.92553	1	0.816091	60.8253
GOTERM_BP_DIRECT	GO:0060048~cardiac muscle contraction	3	3.0303	0.0612672	P09493, P68032, P05023	94	5	1085	6.92553	1	0.816091	60.8253
GOTERM_BP_DIRECT	GO:0006470~protein dephosphorylation	3	3.0303	0.0612672	P63151, Q3ZCQ8, P30153	94	5	1085	6.92553	1	0.816091	60.8253
GOTERM_BP_DIRECT	GO:0043434~response to peptide hormone	3	3.0303	0.0612672	O15164, P17535, P16615	94	5	1085	6.92553	1	0.816091	60.8253
GOTERM_BP_DIRECT	GO:0008285~negative regulation of cell proliferation	8	8.08081	0.0825683	P51531, P05412, P35232, Q68CP9, Q9NPI1, Q12824, Q86U86, O15164	94	45	1085	2.05201	1	0.890505	72.1226
GOTERM_BP_DIRECT	GO:0006629~lipid metabolic process	3	3.0303	0.0868586	P06576, Q9NPA3, P25705	94	6	1085	5.77128	1	0.893424	73.9937
GOTERM_BP_DIRECT	GO:0045214~sarcomere organization	3	3.0303	0.0868586	P09493, Q9Y281, O75083	94	6	1085	5.77128	1	0.893424	73.9937
GOTERM_BP_DIRECT	GO:0051591~response to cAMP	3	3.0303	0.0868586	P05412, P17535, P01100	94	6	1085	5.77128	1	0.893424	73.9937

## Sheet: STAT1
Category	Term	Count	%	PValue	Genes	List Total	Pop Hits	Pop Total	Fold Enrichment	Bonferroni	Benjamini	FDR
GOTERM_BP_DIRECT	GO:0098609~cell-cell adhesion	9	34.6154	3.76854e-08	P07355, Q9UHB6, Q9NYL9, Q9UM54, P42224, O43795, Q14847, Q16643, Q13813	25	28	1085	13.95	9.60974e-06	9.60974e-06	4.91095e-05
GOTERM_BP_DIRECT	GO:0006928~movement of cell or subcellular component	5	19.2308	3.55317e-05	P09493, P26038, P60709, P61158, P40763	25	10	1085	21.7	0.00901981	0.00452012	0.0462929
GOTERM_BP_DIRECT	GO:0038096~Fc-gamma receptor signaling pathway involved in phagocytosis	4	15.3846	9.25847e-05	P60709, P59998, O00159, P61158	25	5	1085	34.72	0.0233337	0.00783918	0.120584
GOTERM_BP_DIRECT	GO:0007015~actin filament organization	4	15.3846	0.000314687	Q9NYL9, P09493, O43795, Q16643	25	7	1085	24.8	0.0771217	0.0198645	0.409307
GOTERM_BP_DIRECT	GO:0007010~cytoskeleton organization	5	19.2308	0.000573352	P09493, P26038, P60709, P23528, Q13813	25	19	1085	11.4211	0.136055	0.0288257	0.744587
GOTERM_BP_DIRECT	GO:0051017~actin filament bundle assembly	3	11.5385	0.00138893	Q9UHB6, O43795, O43707	25	3	1085	43.4	0.298422	0.0573597	1.79492
GOTERM_BP_DIRECT	GO:0008360~regulation of cell shape	4	15.3846	0.00139913	P09493, Q7Z406, P26038, O75083	25	11	1085	15.7818	0.300248	0.0497253	1.808
GOTERM_BP_DIRECT	GO:0007259~JAK-STAT cascade	3	11.5385	0.00666686	P42224, P52630, P40763	25	6	1085	21.7	0.818363	0.19202	8.34784
GOTERM_BP_DIRECT	GO:0048013~ephrin receptor signaling pathway	3	11.5385	0.00920773	P60709, P59998, P61158	25	7	1085	18.6	0.905471	0.230562	11.3563
GOTERM_BP_DIRECT	GO:0030048~actin filament-based movement	3	11.5385	0.00920773	Q9UM54, Q7Z406, O43795	25	7	1085	18.6	0.905471	0.230562	11.3563
GOTERM_BP_DIRECT	GO:0006936~muscle contraction	3	11.5385	0.022844	Q9NYL9, P09493, P14649	25	11	1085	11.8364	0.997241	0.445273	26.0028
GOTERM_BP_DIRECT	GO:0007605~sensory perception of sound	3	11.5385	0.0362976	Q9UM54, Q7Z406, O75083	25	14	1085	9.3	0.99992	0.575607	38.2334
GOTERM_BP_DIRECT	GO:0031529~ruffle organization	2	7.69231	0.0437703	Q9UHB6, P09493	25	2	1085	43.4	0.999989	0.61368	44.1918
GOTERM_BP_DIRECT	GO:0034314~Arp2/3 complex-mediated actin nucleation	2	7.69231	0.064961	P59998, P61158	25	3	1085	28.9333	1	0.732198	58.3255
GOTERM_BP_DIRECT	GO:0060338~regulation of type I interferon-mediated signaling pathway	2	7.69231	0.064961	P42224, P52630	25	3	1085	28.9333	1	0.732198	58.3255
GOTERM_BP_DIRECT	GO:0002576~platelet degranulation	2	7.69231	0.0857012	O75083, O43707	25	4	1085	21.7	1	0.804454	68.8883

## Sheet: NFKB1
Category	Term	Count	%	PValue	Genes	List Total	Pop Hits	Pop Total	Fold Enrichment	Bonferroni	Benjamini	FDR
GOTERM_BP_DIRECT	GO:0006954~inflammatory response	8	42.1053	1.64212e-09	Q8NFZ5, Q01201, Q00653, Q15025, Q04206, P19838, Q9Y6K9, Q04864	19	17	1085	26.8731	3.4156e-07	3.4156e-07	2.07144e-06
GOTERM_BP_DIRECT	GO:0007249~I-kappaB kinase/NF-kappaB signaling	6	31.5789	3.74944e-08	Q8NFZ5, Q01201, Q00653, P19838, Q9Y6K9, Q04864	19	8	1085	42.8289	7.79881e-06	3.89941e-06	4.72971e-05
GOTERM_BP_DIRECT	GO:0051092~positive regulation of NF-kappaB transcription factor activity	6	31.5789	8.19238e-07	Q00653, Q15653, P25963, Q04206, P19838, Q9Y6K9	19	13	1085	26.3563	0.000170387	5.67989e-05	0.00103342
GOTERM_BP_DIRECT	GO:0002223~stimulatory C-type lectin receptor signaling pathway	5	26.3158	3.46866e-05	Q01201, P25963, Q04206, P19838, Q9Y6K9	19	13	1085	21.9636	0.00718898	0.00180211	0.0437464
GOTERM_BP_DIRECT	GO:0038061~NIK/NF-kappaB signaling	4	21.0526	0.000303247	Q01201, Q00653, P19838, Q04864	19	9	1085	25.3801	0.0611362	0.0125377	0.381855
GOTERM_BP_DIRECT	GO:0045087~innate immune response	5	26.3158	0.000386915	Q01201, Q00653, P19838, Q9Y6K9, Q04864	19	23	1085	12.4142	0.0773394	0.013326	0.486976
GOTERM_BP_DIRECT	GO:0050852~T cell receptor signaling pathway	4	21.0526	0.000428704	P25963, Q04206, P19838, Q9Y6K9	19	10	1085	22.8421	0.0853279	0.0126605	0.539442
GOTERM_BP_DIRECT	GO:0071222~cellular response to lipopolysaccharide	4	21.0526	0.000583338	Q8NFZ5, Q15653, Q04206, P19838	19	11	1085	20.7656	0.114294	0.0150567	0.73336
GOTERM_BP_DIRECT	GO:0043123~positive regulation of I-kappaB kinase/NF-kappaB signaling	4	21.0526	0.000990199	Q8NFZ5, Q04206, Q9Y6K9, Q04864	19	13	1085	17.5709	0.186218	0.0226358	1.24192
GOTERM_BP_DIRECT	GO:0038095~Fc-epsilon receptor signaling pathway	4	21.0526	0.000990199	P25963, Q04206, P19838, Q9Y6K9	19	13	1085	17.5709	0.186218	0.0226358	1.24192
GOTERM_BP_DIRECT	GO:0035994~response to muscle stretch	3	15.7895	0.00252565	P25963, Q04206, P19838	19	5	1085	34.2632	0.409036	0.0512406	3.13965
GOTERM_BP_DIRECT	GO:0051403~stress-activated MAPK cascade	3	15.7895	0.00375123	Q8NFZ5, P19838, Q9Y6K9	19	6	1085	28.5526	0.542383	0.0685993	4.63023
GOTERM_BP_DIRECT	GO:0034097~response to cytokine	3	15.7895	0.00686538	Q01201, Q00653, Q04864	19	8	1085	21.4145	0.76139	0.112556	8.32327
GOTERM_BP_DIRECT	GO:0032481~positive regulation of type I interferon production	3	15.7895	0.0182057	Q00653, Q04206, P19838	19	13	1085	13.1781	0.978109	0.254705	20.6872
GOTERM_BP_DIRECT	GO:0007568~aging	3	15.7895	0.0210321	P27824, Q00653, Q04206	19	14	1085	12.2368	0.987982	0.270802	23.5198
GOTERM_BP_DIRECT	GO:0045944~positive regulation of transcription from RNA polymerase II promoter	9	47.3684	0.0224589	Q8NFZ5, Q01201, Q00653, Q15025, P25963, Q04206, P19838, Q9Y6K9, Q04864	19	231	1085	2.22488	0.991127	0.270197	24.914
GOTERM_BP_DIRECT	GO:0043066~negative regulation of apoptotic process	4	21.0526	0.0257967	P25963, Q04206, P19838, Q99623	19	40	1085	5.71053	0.995644	0.288058	28.0847
GOTERM_BP_DIRECT	GO:2000630~positive regulation of miRNA metabolic process	2	10.5263	0.0329196	Q04206, P19838	19	2	1085	57.1053	0.999053	0.336057	34.443
GOTERM_BP_DIRECT	GO:0070431~nucleotide-binding oligomerization domain containing 2 signaling pathway	2	10.5263	0.0329196	P25963, Q04206	19	2	1085	57.1053	0.999053	0.336057	34.443
GOTERM_BP_DIRECT	GO:0032688~negative regulation of interferon-beta production	2	10.5263	0.0329196	Q01201, Q04864	19	2	1085	57.1053	0.999053	0.336057	34.443
GOTERM_BP_DIRECT	GO:0071316~cellular response to nicotine	2	10.5263	0.0329196	Q04206, P19838	19	2	1085	57.1053	0.999053	0.336057	34.443
GOTERM_BP_DIRECT	GO:0031293~membrane protein intracellular domain proteolysis	2	10.5263	0.0329196	Q04206, P19838	19	2	1085	57.1053	0.999053	0.336057	34.443
GOTERM_BP_DIRECT	GO:0006915~apoptotic process	4	21.0526	0.0351655	Q8NFZ5, P25963, P19838, Q9Y6K9	19	45	1085	5.07602	0.999416	0.338783	36.3379
GOTERM_BP_DIRECT	GO:0032495~response to muramyl dipeptide	2	10.5263	0.0489929	P25963, Q04206	19	3	1085	38.0702	0.999971	0.423008	46.9359
GOTERM_BP_DIRECT	GO:0071354~cellular response to interleukin-6	2	10.5263	0.0489929	Q04206, P19838	19	3	1085	38.0702	0.999971	0.423008	46.9359
GOTERM_BP_DIRECT	GO:0042994~cytoplasmic sequestering of transcription factor	2	10.5263	0.0489929	P25963, O00221	19	3	1085	38.0702	0.999971	0.423008	46.9359
GOTERM_BP_DIRECT	GO:0071375~cellular response to peptide hormone stimulus	2	10.5263	0.0489929	Q04206, P19838	19	3	1085	38.0702	0.999971	0.423008	46.9359
GOTERM_BP_DIRECT	GO:0000060~protein import into nucleus, translocation	2	10.5263	0.0489929	P25963, Q99623	19	3	1085	38.0702	0.999971	0.423008	46.9359
GOTERM_BP_DIRECT	GO:1901215~negative regulation of neuron death	2	10.5263	0.0803857	Q9Y6K9, Q04864	19	5	1085	22.8421	1	0.581689	65.2539
GOTERM_BP_DIRECT	GO:0050727~regulation of inflammatory response	2	10.5263	0.0957127	Q15025, Q04206	19	6	1085	19.0351	1	0.63083	71.8919

## Sheet: SP7
Category	Term	Count	%	PValue	Genes	List Total	Pop Hits	Pop Total	Fold Enrichment	Bonferroni	Benjamini	FDR
GOTERM_BP_DIRECT	GO:0006351~transcription, DNA-templated	131	46.7857	4.40621e-08	P54253, P51531, P27540, Q92925, P54259, Q9UPN9, Q08117, Q6ZW49, P85037, Q96RK0, Q8IVH2, P51532, Q9Y6Q9, Q86SE9, Q9H7S9, Q6STE5, Q92922, Q15532, Q9UKL0, Q99496, Q9P2D1, Q14814, Q6W2J9, Q12824, Q8TDD2, O75362, Q8N488, Q8NF64, O60907, Q3KNV8, P39880, Q01844, Q8IX15, Q02078, Q9P0W2, Q6MZP7, Q15723, O60315, O00712, Q8IX12, Q9H334, Q8NHM5, Q12857, Q9NP66, Q96RE7, Q8IU81, Q15596, O43823, Q8NFD5, Q86UP3,…	261	388	1085	1.40355	4.77622e-05	4.77622e-05	7.03323e-05
GOTERM_BP_DIRECT	GO:0000398~mRNA splicing, via spliceosome	27	9.64286	1.25244e-06	O94913, Q9UBB9, O95400, Q9BRX9, P14678, Q92989, Q96IZ7, Q8N684, O00148, P09012, Q9H307, Q96DF8, Q9P2I0, P09651, Q10570, P52272, P51991, P22626, P17844, Q8IY67, Q8IWZ8, Q9H2H8, Q9BXP5, P35637, O75400, P08621, Q8IX12	261	46	1085	2.44003	0.00135672	0.000678592	0.00199914
GOTERM_BP_DIRECT	GO:0044255~cellular lipid metabolic process	12	4.28571	6.14648e-06	Q9Y618, Q6STE5, Q96ST3, Q14686, O75376, Q9BZK7, O15379, Q15596, O60907, Q92793, O75182, Q15788	261	13	1085	3.83731	0.00664066	0.00221847	0.00981063
GOTERM_BP_DIRECT	GO:0006337~nucleosome disassembly	10	3.57143	1.85011e-05	Q68CP9, Q6STE5, Q12824, Q8TAQ2, Q92925, Q969G3, Q92922, Q96GM5, O14497, P51532	261	10	1085	4.15709	0.0198557	0.00500131	0.0295276
GOTERM_BP_DIRECT	GO:0007399~nervous system development	15	5.35714	7.30304e-05	Q14814, P51531, Q9NR56, Q09472, Q12824, Q8WUB8, Q92784, Q92782, Q96GM5, Q8NFD5, P51532, Q96DF8, O60315, Q92922, P56179	261	22	1085	2.83438	0.0761152	0.0157089	0.116508
GOTERM_BP_DIRECT	GO:0006397~mRNA processing	20	7.14286	8.21366e-05	Q9NR56, Q9UPN6, Q9H0D6, Q07666, Q9C0J8, P22626, Q9UBB9, P49756, Q5T481, Q9P2N5, Q7Z6E9, Q14498, Q96PU8, Q9BWF3, P57052, Q92945, P08621, Q9NW13, P09651, P98175	261	35	1085	2.37548	0.0851907	0.0147304	0.131027
GOTERM_BP_DIRECT	GO:1904837~beta-catenin-TCF complex assembly	13	4.64286	0.000130016	Q9Y3Y4, Q9UBL3, O00512, Q09472, Q92793, P51532, O14686, Q86UU0, Q04726, Q9BRQ0, Q04727, Q04724, Q9NQB0	261	18	1085	3.00234	0.131464	0.0199338	0.207331
GOTERM_BP_DIRECT	GO:0000122~negative regulation of transcription from RNA polymerase II promoter	64	22.8571	0.000348111	P51531, Q06546, P54259, Q9UPN9, Q08117, Q96RK0, P51532, Q9P2K3, Q04727, Q04724, Q9H0E3, Q9Y2X9, P08651, Q9UKL0, Q9NQB0, Q99496, Q6W2J9, Q9UPW6, P15822, Q96ST3, O75362, Q8N488, P22626, O60907, P39880, P17844, Q5PSV4, O60341, Q8IX15, Q02078, Q9H2F5, O60315, O00712, O14497, Q9H334, Q8NHM5, Q9P2R6, Q12857, Q9NP66, O75376, O15379, Q15596, Q92793, Q9UHF7, O75030, O43829, O15090, Q9H7L9, P0C7T5, Q96KQ7,…	261	184	1085	1.44594	0.31437	0.0460817	0.554213
GOTERM_BP_DIRECT	GO:0008380~RNA splicing	17	6.07143	0.000663154	Q9NR56, Q9UPN6, Q14966, Q9UBB9, P49756, Q5T481, Q9Y2W2, P14678, Q14498, Q96PU8, Q96IZ7, Q9BWF3, P57052, Q92945, P08621, Q9NW13, P98175	261	31	1085	2.27969	0.512808	0.076791	1.0533
GOTERM_BP_DIRECT	GO:0016055~Wnt signaling pathway	12	4.28571	0.000764267	P19784, Q9Y3Y4, Q86U70, Q04726, Q9NPI1, Q04727, Q9BRQ0, Q04724, Q9BQE9, Q08117, P67870, Q9NQB0	261	18	1085	2.77139	0.563419	0.0795367	1.21298
GOTERM_BP_DIRECT	GO:0006355~regulation of transcription, DNA-templated	77	27.5	0.00285406	Q86U70, P51531, Q969J2, Q96A47, Q9UBL3, Q12873, Q9H0D6, Q9UBB9, Q9Y5A6, P51532, Q9Y6Q9, Q96AE4, Q9H7S9, Q04726, P61244, Q04724, Q9H307, Q9H0E3, P49750, Q12948, P31260, Q9P2D1, Q9UQ88, Q9UPW6, Q96ST3, O75362, Q92830, Q3KNV8, Q01844, Q02078, O14686, Q9H2Z4, P17036, Q9P0W2, Q6MZP7, Q8IX12, Q9UIU6, P19784, Q03111, Q9UGU0, Q12857, Q9BSM1, Q68CP9, Q9NP66, Q8WUB8, Q8IU81, O95677, Q15596, O43823, Q92793,…	261	246	1085	1.3012	0.95487	0.245467	4.45968
GOTERM_BP_DIRECT	GO:0016569~covalent chromatin modification	20	7.14286	0.00440631	Q68CP9, Q9UPW6, Q9NP66, Q92925, Q8TAQ2, Q12824, O75177, Q92784, O75376, Q96GM5, Q8NFD5, O60264, P51532, Q6STE5, Q86U86, Q969G3, Q92922, Q9UK53, O14497, Q9P2D1	261	45	1085	1.84759	0.991663	0.328953	6.80624
GOTERM_BP_DIRECT	GO:0006338~chromatin remodeling	20	7.14286	0.00778445	P51531, Q01826, Q9UPW6, Q92925, Q8TAQ2, Q12824, P11387, Q92830, Q96GM5, Q8NFD5, O60264, P51532, Q92831, Q6STE5, Q86U86, Q969G3, Q92922, O14497, Q9P2D1, Q9P2R6	261	47	1085	1.76897	0.999791	0.478811	11.7276
GOTERM_BP_DIRECT	GO:0035518~histone H2A monoubiquitination	6	2.14286	0.0104112	Q6W2J9, Q9BSM1, Q8N488, Q06587, Q99496, Q8NHM5	261	7	1085	3.56322	0.999988	0.555297	15.3847
GOTERM_BP_DIRECT	GO:0045892~negative regulation of transcription, DNA-templated	40	14.2857	0.0153889	P54253, Q86U70, P51531, Q9NPI1, Q07666, Q96RE7, Q9UPN9, Q08117, O15379, P85037, Q8IY57, P51532, O43829, Q9H7L9, Q9H7S9, P38398, Q04724, Q9Y2X9, P78337, Q63HK5, Q9UKL0, Q9NQB0, Q6W2J9, Q96ST3, Q8TAQ2, O75362, P14859, Q6KC79, O60341, Q9H2F5, Q9UQR1, Q9H9B1, Q969G3, Q15723, O15164, Q4VC05, Q14865, Q06587, Q9H334, Q9UIU6	261	120	1085	1.3857	1	0.673965	21.9288
GOTERM_BP_DIRECT	GO:0045944~positive regulation of transcription from RNA polymerase II promoter	69	24.6429	0.0185859	Q86U70, Q9Y3Y4, P51531, P27540, Q9UBL3, Q06546, Q9Y5A6, P51532, Q9Y6Q9, Q86SE9, Q86UU0, Q92922, P08651, Q15532, Q12948, P31260, Q9P2D1, Q9NQB0, Q14814, O75928, Q9UPW6, Q12824, Q96ST3, Q9BWW4, Q8TDD2, Q8NF64, O60907, P17844, O60341, Q9BTK6, Q92831, Q02078, O14686, Q01543, Q9H2F5, Q9BRQ0, O60315, Q6N021, O00712, Q16594, Q9H334, Q9P2R6, Q9UIU6, Q8IVW6, Q9UGU0, O00512, Q12857, O15379, Q15596, Q92793,…	261	231	1085	1.24173	1	0.719462	25.8783
GOTERM_BP_DIRECT	GO:0030326~embryonic limb morphogenesis	6	2.14286	0.0223706	Q9NR56, P40425, P56179, P40424, P0CG40, P31260	261	8	1085	3.11782	1	0.7637	30.3116
GOTERM_BP_DIRECT	GO:0001701~in utero embryonic development	12	4.28571	0.0283668	Q7Z6E9, O15550, Q9NR56, Q96ST3, Q9ULJ6, Q9BRQ0, Q06546, Q92830, O60341, Q9H334, Q12948, Q9P2D1	261	26	1085	1.91866	1	0.823248	36.8299
GOTERM_BP_DIRECT	GO:0006379~mRNA cleavage	5	1.78571	0.0319942	Q92989, O94913, Q10570, Q9C0J8, Q9P2I0	261	6	1085	3.46424	1	0.843577	40.491
GOTERM_BP_DIRECT	GO:0006378~mRNA polyadenylation	5	1.78571	0.0319942	Q92989, O94913, Q10570, O95639, Q9P2I0	261	6	1085	3.46424	1	0.843577	40.491
GOTERM_BP_DIRECT	GO:0043044~ATP-dependent chromatin remodeling	8	2.85714	0.0448147	Q12824, Q8TAQ2, Q92925, Q969G3, Q92922, O60264, O14497, P51532	261	15	1085	2.21711	1	0.91668	51.8987
GOTERM_BP_DIRECT	GO:0007275~multicellular organism development	20	7.14286	0.0648117	Q86U70, P15822, Q92618, Q99504, Q8N488, O95677, Q08117, P39880, Q96SI1, Q96KR1, O75030, O15090, Q96PN7, Q04724, P17036, Q9H2Z4, P57052, P61962, Q63HK5, P31260	261	57	1085	1.45863	1	0.968534	65.6847
GOTERM_BP_DIRECT	GO:0051028~mRNA transport	6	2.14286	0.0656989	Q96PU8, P51991, Q92945, Q9NZI8, O00425, P09651	261	10	1085	2.49425	1	0.96486	66.2006
GOTERM_BP_DIRECT	GO:0016575~histone deacetylation	10	3.57143	0.0748236	Q4LE39, Q9H7L9, Q12873, Q96ST3, Q9P0W2, Q9BZK7, O60907, Q5PSV4, O75182, O60341	261	23	1085	1.80743	1	0.974405	71.1017
GOTERM_BP_DIRECT	GO:0048096~chromatin-mediated maintenance of transcription	4	1.42857	0.0924043	Q96GM5, Q9UMN6, Q8NFD5, O14497	261	5	1085	3.32567	1	0.987465	78.7248
GOTERM_BP_DIRECT	GO:0033148~positive regulation of intracellular estrogen receptor signaling pathway	4	1.42857	0.0924043	O14686, P17844, Q9BTK6, Q92841	261	5	1085	3.32567	1	0.987465	78.7248
GOTERM_BP_DIRECT	GO:0060021~palate development	6	2.14286	0.0975742	Q6W2J9, Q9UPW6, Q9BRQ0, P56179, Q14865, Q9P2D1	261	11	1085	2.2675	1	0.988341	80.5789

## Sheet: GATA1
Category	Term	Count	%	PValue	Genes	List Total	Pop Hits	Pop Total	Fold Enrichment	Bonferroni	Benjamini	FDR
GOTERM_BP_DIRECT	GO:0000398~mRNA splicing, via spliceosome	10	16.9492	0.000252353	O94913, P26599, P52272, Q8N684, O43390, O75400, Q9P2I0, Q8IY67, Q8IX12, Q05048	55	46	1085	4.28854	0.0694037	0.0694037	0.334064
GOTERM_BP_DIRECT	GO:0006351~transcription, DNA-templated	32	54.2373	0.000718199	Q9H2U1, P51531, Q8WW38, Q9NP66, Q9NPI1, Q9BSM1, Q07666, Q15654, O43823, Q6ZW49, Q8NFD5, Q5T5X7, Q92841, Q9P2K3, Q04726, Q04724, Q6W2J9, Q9UPW6, Q9Y618, Q92785, Q12824, Q14966, Q92782, O60907, O15226, Q96I24, Q01844, O14686, Q06587, Q8IX12, Q5VUA4, Q8NHM5	55	388	1085	1.62699	0.185157	0.0973136	0.94804
GOTERM_BP_DIRECT	GO:0006378~mRNA polyadenylation	4	6.77966	0.002098	O94913, O95639, Q9P2I0, Q05048	55	6	1085	13.1515	0.450396	0.180876	2.74613
GOTERM_BP_DIRECT	GO:0035518~histone H2A monoubiquitination	4	6.77966	0.00354238	Q6W2J9, Q9BSM1, Q06587, Q8NHM5	55	7	1085	11.2727	0.63628	0.22341	4.59602
GOTERM_BP_DIRECT	GO:0007399~nervous system development	5	8.47458	0.0205488	P51531, Q12824, Q92782, Q96GM5, Q8NFD5	55	22	1085	4.48347	0.997308	0.69379	24.0643
GOTERM_BP_DIRECT	GO:0031124~mRNA 3'-end processing	4	6.77966	0.028729	O94913, Q8N684, Q9P2I0, Q05048	55	14	1085	5.63636	0.999753	0.749579	32.0556
GOTERM_BP_DIRECT	GO:0006379~mRNA cleavage	3	5.08475	0.032069	O94913, Q9P2I0, Q05048	55	6	1085	9.86364	0.999908	0.734744	35.0889
GOTERM_BP_DIRECT	GO:0006369~termination of RNA polymerase II transcription	4	6.77966	0.0411932	O94913, Q8N684, Q9P2I0, Q05048	55	16	1085	4.93182	0.999994	0.776555	42.749
GOTERM_BP_DIRECT	GO:1904837~beta-catenin-TCF complex assembly	4	6.77966	0.0559599	O14686, O00512, Q04726, Q04724	55	18	1085	4.38384	1	0.838553	53.3972
GOTERM_BP_DIRECT	GO:0006396~RNA processing	4	6.77966	0.0821513	Q9H2U1, Q8IX01, Q92841, Q05048	55	21	1085	3.75758	1	0.913109	67.9076
GOTERM_BP_DIRECT	GO:0006397~mRNA processing	5	8.47458	0.0912541	P26599, Q8IX01, Q07666, Q5T481, O43390	55	35	1085	2.81818	1	0.916193	71.8802

## Sheet: GATA3
Category	Term	Count	%	PValue	Genes	List Total	Pop Hits	Pop Total	Fold Enrichment	Bonferroni	Benjamini	FDR
GOTERM_BP_DIRECT	GO:0035518~histone H2A monoubiquitination	7	6.73077	2.69621e-06	Q6W2J9, Q9BSM1, Q8N488, P63208, Q06587, Q99496, Q8NHM5	97	7	1085	11.1856	0.00175638	0.00175638	0.0040273
GOTERM_BP_DIRECT	GO:0000122~negative regulation of transcription from RNA polymerase II promoter	34	32.6923	1.0173e-05	P51531, Q12857, Q8WW38, Q9NP66, O75376, Q6NUN9, Q08117, Q92793, Q9UHF7, Q5T5X7, Q96RK0, O15090, Q9P2K3, Q04724, Q9BZK7, P49711, Q9Y2X9, P08651, Q9UKL0, P23769, Q9NQB0, Q99496, Q6W2J9, Q01826, Q9UPW6, Q09472, Q9Y618, P15822, Q8N488, O60907, O60341, P23771, O14497, Q8NHM5	97	184	1085	2.0669	0.00661089	0.00331093	0.0151945
GOTERM_BP_DIRECT	GO:0006351~transcription, DNA-templated	53	50.9615	8.7481e-05	P51531, Q92925, Q08117, Q6ZW49, Q96RK0, Q8IY57, Q9Y6Q9, Q9P2K3, Q9H7S9, Q04726, Q04724, Q92922, Q9Y2X9, P08651, Q9UKL0, Q9P2D1, Q9NQB0, Q99496, P23769, Q6W2J9, Q9UPW6, Q12824, Q8N488, O60907, Q01844, O60341, O14686, O14497, Q8IX12, Q8NHM5, Q12857, Q8WW38, Q9NP66, Q9BSM1, Q6NUN9, O43823, Q8NFD5, Q5T5X7, Q96C00, Q92841, Q86UP3, O15090, Q86U86, Q96F45, Q9BZK7, Q6PJG2, Q01826, Q9Y618, Q92785, Q92782,…	97	388	1085	1.52793	0.0554438	0.0188338	0.130592
GOTERM_BP_DIRECT	GO:0009887~organ morphogenesis	8	7.69231	0.000483657	Q04726, Q09472, P23771, Q04724, Q08117, Q92922, Q9UHF7, P23769	97	18	1085	4.97136	0.270518	0.0758263	0.720018
GOTERM_BP_DIRECT	GO:0016569~covalent chromatin modification	12	11.5385	0.00117241	Q9NP66, Q9UPW6, Q12824, Q92925, Q86U86, O75376, Q92922, Q96GM5, P49711, Q8NFD5, O14497, Q9P2D1	97	45	1085	2.98282	0.534601	0.141846	1.73702
GOTERM_BP_DIRECT	GO:0006338~chromatin remodeling	12	11.5385	0.00172885	P51531, Q01826, P23771, Q9UPW6, Q12824, Q92925, Q86U86, Q92922, Q96GM5, Q8NFD5, O14497, Q9P2D1	97	47	1085	2.85589	0.676381	0.171411	2.55154
GOTERM_BP_DIRECT	GO:1904837~beta-catenin-TCF complex assembly	7	6.73077	0.00317646	O14686, O00512, Q04726, Q09472, Q04724, Q92793, Q9NQB0	97	18	1085	4.34994	0.874362	0.256462	4.64114
GOTERM_BP_DIRECT	GO:0000398~mRNA splicing, via spliceosome	11	10.5769	0.0050577	O94913, P26599, P52272, P14866, Q8N684, O43390, O75400, Q9P2I0, Q8IY67, Q8IX12, P38159	97	46	1085	2.67481	0.963337	0.338502	7.29423
GOTERM_BP_DIRECT	GO:0007507~heart development	7	6.73077	0.00745456	Q6W2J9, Q09472, P23771, Q5T481, Q9UHF7, Q12948, P23769	97	21	1085	3.72852	0.992392	0.418453	10.5748
GOTERM_BP_DIRECT	GO:0006337~nucleosome disassembly	5	4.80769	0.00797797	Q12824, Q92925, Q92922, Q96GM5, O14497	97	10	1085	5.59278	0.994606	0.406816	11.2766
GOTERM_BP_DIRECT	GO:0007399~nervous system development	7	6.73077	0.00952838	P51531, Q09472, Q12824, Q92782, Q92922, Q96GM5, Q8NFD5	97	22	1085	3.55904	0.998055	0.433048	13.3254
GOTERM_BP_DIRECT	GO:0045944~positive regulation of transcription from RNA polymerase II promoter	30	28.8462	0.0203195	Q8IVW6, P51531, O00512, Q12857, Q8WW38, Q6NUN9, Q92793, Q9UHF7, Q92841, Q9Y6Q9, Q9BZK7, P49711, Q92922, P08651, Q12948, Q9P2D1, Q9NQB0, P23769, Q99856, Q9UPW6, Q09472, Q12824, O60907, Q96I24, Q8TEK3, O60341, O14686, P23771, P38159, Q9UIU6	97	231	1085	1.45267	0.999998	0.672215	26.4086
GOTERM_BP_DIRECT	GO:0010467~gene expression	5	4.80769	0.0220674	P26599, P52272, P14866, O43390, P38159	97	13	1085	4.30214	1	0.673445	28.3456
GOTERM_BP_DIRECT	GO:0044255~cellular lipid metabolic process	5	4.80769	0.0220674	Q9Y618, O75376, Q9BZK7, O60907, Q92793	97	13	1085	4.30214	1	0.673445	28.3456
GOTERM_BP_DIRECT	GO:0010628~positive regulation of gene expression	7	6.73077	0.0262815	Q96AE4, O15550, Q96PU8, Q04724, P49711, Q96I24, Q9Y6Q9	97	27	1085	2.89996	1	0.710714	32.8219
GOTERM_BP_DIRECT	GO:0007596~blood coagulation	5	4.80769	0.0288386	Q8WW38, P23771, Q9UKL0, O60341, P23769	97	14	1085	3.99485	1	0.719715	35.4094
GOTERM_BP_DIRECT	GO:0042472~inner ear morphogenesis	4	3.84615	0.0380596	P23771, Q9P2D1, Q9UIU6, P23769	97	9	1085	4.97136	1	0.794275	43.988
GOTERM_BP_DIRECT	GO:0060070~canonical Wnt signaling pathway	5	4.80769	0.0457168	O15550, O00512, Q9BZK7, O60907, Q9NQB0	97	16	1085	3.49549	1	0.833826	50.2909
GOTERM_BP_DIRECT	GO:0006355~regulation of transcription, DNA-templated	30	28.8462	0.0457282	P51531, Q12857, Q9BSM1, Q9NP66, Q6NUN9, O43823, Q92793, Q96C00, Q9Y6Q9, Q86UP3, Q96AE4, Q04726, Q9H7S9, Q04724, Q86U86, Q96F45, Q12948, Q9P2D1, Q01826, Q9UPW6, Q09472, Q92785, Q92782, Q01844, P55198, O14686, Q13148, Q8IX12, Q8N972, Q9UIU6	97	246	1085	1.36409	1	0.816482	50.2997
GOTERM_BP_DIRECT	GO:0045892~negative regulation of transcription, DNA-templated	17	16.3462	0.0533595	P51531, Q6W2J9, Q8WW38, Q08117, Q6NUN9, O60341, Q8IY57, Q9H7S9, P23771, Q04724, P49711, Q4VC05, Q9Y2X9, Q06587, Q9UKL0, Q9UIU6, Q9NQB0	97	120	1085	1.58462	1	0.847675	55.9169
GOTERM_BP_DIRECT	GO:0000380~alternative mRNA splicing, via spliceosome	3	2.88462	0.0649292	P26599, P52272, O60341	97	5	1085	6.71134	1	0.887919	63.3141
GOTERM_BP_DIRECT	GO:0048096~chromatin-mediated maintenance of transcription	3	2.88462	0.0649292	Q96GM5, Q8NFD5, O14497	97	5	1085	6.71134	1	0.887919	63.3141
GOTERM_BP_DIRECT	GO:0043627~response to estrogen	4	3.84615	0.0656728	O14686, Q09472, P23771, P10809	97	11	1085	4.06748	1	0.878643	63.7475
GOTERM_BP_DIRECT	GO:0016055~Wnt signaling pathway	5	4.80769	0.0670755	Q04726, Q04724, P63208, Q08117, Q9NQB0	97	18	1085	3.1071	1	0.87225	64.552
GOTERM_BP_DIRECT	GO:0001701~in utero embryonic development	6	5.76923	0.0720615	O15550, Q8WW38, P23771, O60341, Q12948, Q9P2D1	97	26	1085	2.58128	1	0.879984	67.2789
GOTERM_BP_DIRECT	GO:0006397~mRNA processing	7	6.73077	0.08105	Q96PU8, P26599, Q8IX01, P14866, Q5T481, O43390, Q13148	97	35	1085	2.23711	1	0.899362	71.7067
GOTERM_BP_DIRECT	GO:0048565~digestive tract development	3	2.88462	0.0918785	P23771, Q9UHF7, P23769	97	6	1085	5.59278	1	0.919017	76.2978
GOTERM_BP_DIRECT	GO:0045599~negative regulation of fat cell differentiation	3	2.88462	0.0918785	Q8WW38, P23771, P23769	97	6	1085	5.59278	1	0.919017	76.2978

## Sheet: TYY1
Category	Term	Count	%	PValue	Genes	List Total	Pop Hits	Pop Total	Fold Enrichment	Bonferroni	Benjamini	FDR
GOTERM_BP_DIRECT	GO:0043984~histone H4-K16 acetylation	10	7.5188	1.64225e-07	Q96EZ8, O15294, Q7Z3B3, Q9P2N6, Q9H9L4, Q68DK7, Q03164, P61964, Q9H7Z6, P51610	130	11	1085	7.58741	7.14353e-05	7.14353e-05	0.000231856
GOTERM_BP_DIRECT	GO:0006355~regulation of transcription, DNA-templated	51	38.3459	7.98322e-06	P0C1Z6, Q5T3J3, Q7Z589, Q76L83, Q9UBL3, Q12873, Q12830, Q9ULM3, Q9H7Z6, Q6PI98, Q8IYH5, Q9H582, Q9H981, Q9P2D1, Q9Y4A5, O95619, Q9ULU4, Q92830, Q969R5, Q15291, Q6P4R8, Q9C086, Q96EZ8, Q8N1G0, P52739, Q6MZP7, Q96ME7, Q8IXJ9, Q68CP9, Q8NB78, Q9Y5K5, Q8NBZ0, O15047, Q96C00, P51610, Q8WUU5, Q4LE39, Q96ES7, Q96JM7, Q86U86, Q96KM6, Q8IWI9, Q15542, Q9H9F9, Q92993, Q9H0E9, O15391, Q9H2P0, Q92610, Q9P0U4,…	130	246	1085	1.7303	0.00346669	0.00173485	0.0112703
GOTERM_BP_DIRECT	GO:0043981~histone H4-K5 acetylation	8	6.01504	8.48002e-06	Q96EZ8, O15294, Q7Z3B3, Q9P2N6, Q9H9L4, P61964, Q9H7Z6, P51610	130	9	1085	7.4188	0.00368203	0.00122885	0.0119716
GOTERM_BP_DIRECT	GO:0043982~histone H4-K8 acetylation	8	6.01504	8.48002e-06	Q96EZ8, O15294, Q7Z3B3, Q9P2N6, Q9H9L4, P61964, Q9H7Z6, P51610	130	9	1085	7.4188	0.00368203	0.00122885	0.0119716
GOTERM_BP_DIRECT	GO:0006351~transcription, DNA-templated	69	51.8797	2.02824e-05	Q5T3J3, P0C1Z6, Q7Z589, Q9UBL3, Q9HCK8, Q76L83, Q9ULG1, Q12873, Q6VMQ6, Q12830, Q6PI98, Q9H7Z6, Q8IYH5, Q13610, Q9H582, Q96QT6, Q9H981, Q9P2D1, Q9Y4A5, Q8WUA4, O95619, Q9UKY1, O75528, Q15291, Q9NPF5, Q969R5, Q5PSV4, Q9Y6X8, Q9C086, Q96EZ8, Q8N1G0, P52739, Q5TKA1, Q6MZP7, Q96ME7, P61964, Q9BTC0, Q8IXJ9, Q68CP9, Q9NPI1, Q8NB78, Q8NBZ0, Q9Y5K5, Q9UBW7, O15047, Q96C00, Q4LE39, Q96JM7, Q96ES7, Q12789,…	130	388	1085	1.48424	0.00878412	0.0022033	0.0286313
GOTERM_BP_DIRECT	GO:0006368~transcription elongation from RNA polymerase II promoter	9	6.76692	2.499e-05	Q15542, Q6I9Y2, P49848, O00268, P21675, Q5VWG9, Q6P1X5, Q16594, Q9HBM6	130	13	1085	5.77811	0.0108119	0.00217179	0.0352757
GOTERM_BP_DIRECT	GO:1901796~regulation of signal transduction by p53 class mediator	14	10.5263	3.74336e-05	Q15542, P49848, Q12873, Q9NPI1, P21675, Q5VWG9, Q92993, Q9HBM6, O00268, Q96KQ7, Q9H9B1, O15164, Q6P1X5, Q16594	130	33	1085	3.54079	0.0161521	0.00271031	0.0528367
GOTERM_BP_DIRECT	GO:0043966~histone H3 acetylation	11	8.27068	4.52287e-05	Q96ES7, O75478, Q92830, O75528, Q9H8E8, Q9ULM3, Q16594, P61964, Q9HBM6, Q9NS73, Q92831	130	21	1085	4.37179	0.0194826	0.00280676	0.063836
GOTERM_BP_DIRECT	GO:0051568~histone H3-K4 methylation	7	5.26316	0.00127225	Q9UBL3, Q9UMN6, Q15291, Q03164, P61964, O15047, Q9P0U4	130	12	1085	4.86859	0.425227	0.066881	1.78128
GOTERM_BP_DIRECT	GO:0006310~DNA recombination	10	7.5188	0.00192099	Q96EZ8, P0C1Z6, O60216, Q9H9F9, Q8NBZ0, Q9Y5K5, Q6P4R8, Q9H981, Q6PI98, Q9C086	130	26	1085	3.21006	0.566748	0.0887493	2.67819
GOTERM_BP_DIRECT	GO:0006338~chromatin remodeling	13	9.77444	0.00636167	Q9ULG1, Q9GZN1, O75478, Q92830, Q9NPF5, O60264, Q12830, Q6PI98, Q9C086, Q92831, Q86U86, Q9H981, Q9P2D1	130	47	1085	2.30851	0.937723	0.242413	8.61624
GOTERM_BP_DIRECT	GO:0006281~DNA repair	12	9.02256	0.00881684	Q96EZ8, P0C1Z6, Q7Z589, Q9ULG1, Q9NPF5, Q8NBZ0, Q9Y5K5, Q6P4R8, Q9H981, Q6PI98, Q9C086, Q9Y4A5	130	43	1085	2.32916	0.97877	0.295461	11.753
GOTERM_BP_DIRECT	GO:0051123~RNA polymerase II transcriptional preinitiation complex assembly	5	3.7594	0.00912173	O00268, P21675, Q6P1X5, Q16594, Q9HBM6	130	8	1085	5.21635	0.981429	0.282642	12.1354
GOTERM_BP_DIRECT	GO:0016573~histone acetylation	7	5.26316	0.0102644	Q15542, O75478, P21675, Q92993, Q6ZRS2, Q9H7Z6, Q9Y4A5	130	17	1085	3.43665	0.988758	0.291949	13.5552
GOTERM_BP_DIRECT	GO:0016569~covalent chromatin modification	12	9.02256	0.0126021	Q7Z589, Q9HCK8, Q68CP9, Q96JM7, Q86U86, Q8IXM2, Q9Y6J0, Q969R5, Q15906, Q12830, O60264, Q9P2D1	130	45	1085	2.22564	0.995981	0.325682	16.3936
GOTERM_BP_DIRECT	GO:0006352~DNA-templated transcription, initiation	6	4.51128	0.0128524	Q15542, P49848, O00268, P21675, O60264, Q16594	130	13	1085	3.85207	0.996401	0.312804	16.6924
GOTERM_BP_DIRECT	GO:0007067~mitotic nuclear division	8	6.01504	0.0217663	Q69YH5, O95619, O60216, O75478, Q86U86, O75528, Q14980, Q9H981	130	25	1085	2.67077	0.99993	0.450259	26.7063
GOTERM_BP_DIRECT	GO:0042797~tRNA transcription from RNA polymerase III promoter	3	2.25564	0.0388248	Q9Y5Q9, Q12789, Q8WUA4	130	3	1085	8.34615	1	0.636965	42.8255
GOTERM_BP_DIRECT	GO:0042791~5S class rRNA transcription from RNA polymerase III type 1 promoter	3	2.25564	0.0388248	Q9Y5Q9, Q12789, Q8WUA4	130	3	1085	8.34615	1	0.636965	42.8255
GOTERM_BP_DIRECT	GO:0031063~regulation of histone deacetylation	3	2.25564	0.0388248	O75478, O75528, O43257	130	3	1085	8.34615	1	0.636965	42.8255
GOTERM_BP_DIRECT	GO:0043968~histone H2A acetylation	5	3.7594	0.044117	O95619, Q96L91, Q9NPF5, Q9H0E9, Q9Y4A5	130	12	1085	3.47756	1	0.663916	47.1129
GOTERM_BP_DIRECT	GO:0006306~DNA methylation	5	3.7594	0.044117	Q96KQ7, Q9H9B1, Q9NPF5, Q6VMQ6, Q03164	130	12	1085	3.47756	1	0.663916	47.1129
GOTERM_BP_DIRECT	GO:0031647~regulation of protein stability	4	3.00752	0.058704	O75478, Q92830, O75528, O15164	130	8	1085	4.17308	1	0.749696	57.4342
GOTERM_BP_DIRECT	GO:0006367~transcription initiation from RNA polymerase II promoter	9	6.76692	0.0623699	Q15542, P49848, O00268, P21675, Q5VWG9, Q6P1X5, Q16594, Q9HBM6, Q92831	130	37	1085	2.03015	1	0.753574	59.7158
GOTERM_BP_DIRECT	GO:0043967~histone H4 acetylation	6	4.51128	0.064632	O95619, O75528, Q96L91, Q9NPF5, Q9H0E9, Q9Y4A5	130	19	1085	2.63563	1	0.749433	61.0664
GOTERM_BP_DIRECT	GO:0035948~positive regulation of gluconeogenesis by positive regulation of transcription from RNA polymerase II promoter	3	2.25564	0.0716394	Q92830, P61964, Q92831	130	4	1085	6.25962	1	0.77003	64.988
GOTERM_BP_DIRECT	GO:0006302~double-strand break repair	5	3.7594	0.0919093	Q9ULG1, O60216, Q9H9F9, Q92993, O60264	130	15	1085	2.78205	1	0.838528	74.3635

[truncated: 8 more sheets: ELF1, ELF2, ELF4, ELF1, 2 and 4, MYC, KLF6, HNF4A, KLF8]
