# Supplementary material for: Human transcription factor protein interaction networks
Source: Research Square preprint supplement (doi:10.21203/rs.3.rs-228624/v1), 2021-02-23
Supplement: Supplementary file 2 [file 2dea8be706b35fe4ca76625d.xlsx]

## Sheet: C1
Baits in cluster 1						Preys in cluster 1					PSM average per bait
Uniprot	Bait	Frequency	PSM sum	% of PSMs		Name	Uniprot	Protein names	Function (Uniprot)	order in cluster		CPEB1	GLI3	GLI2	ETV6	SP7	GATA3	ISX	GCM1	PAX6	TLX2	SOX15	HNF1A	KLF5	FOXL1	STAT4	ERG	GATA1	CREB1	GATA2	ETV4	PAX9	NHLH1	PAX8	IRF4	LHX4	TEAD3	SPZ1	KLF15	KLF12	FEV	SOX2	HNF1B
Q9BZB8	CPEB1	82	1744	75.6042		1433F	Q04917	14-3-3 protein eta (Protein AS1)	FUNCTION: Adapter protein implicated in the regulation of a large spectrum of both general and specialized signaling pathways. Binds to a large number of partners, usually by recognition of a phosphoserine or phosphothreonine motif. Binding generally results in the modulation of the activity of the binding partner. Negatively regulates the kinase activity of PDPK1. {ECO:0000269|PubMed:12177059}.	1	Q04917	4.25	0	0	0	0	0	0	0	3	0	0	0	0	3.5	0	0	0	0	0	0	0	0	0	0	0	0	0	0	0	0	0	0
P10071	GLI3	13	145	6.2859		HNRPL	P14866	Heterogeneous nuclear ribonucleoprotein L (hnRNP L)	FUNCTION: Splicing factor binding to exonic or intronic sites and acting as either an activator or repressor of exon inclusion. Exhibits a binding preference for CA-rich elements (PubMed:11809897, PubMed:22570490, PubMed:24164894, PubMed:25623890, PubMed:26051023). Component of the heterogeneous nuclear ribonucleoprotein (hnRNP) complexes and associated with most nascent transcripts (PubMed:26872…	2	P14866	16.5	0	0	0	0	17.5	0	0	0	0	0	0	0	0	0	0	0	0	0	0	0	0	0	0	0	0	0	0	0	0	0	0
P10070	GLI2	7	72	3.12127		OTUD4	Q01804	OTU domain-containing protein 4 (EC 3.4.19.12) (HIV-1-induced protein HIN-1)	FUNCTION: Deubiquitinase which hydrolyzes the isopeptide bond between the ubiquitin C-terminus and the lysine epsilon-amino group of the target protein (PubMed:23827681, PubMed:25944111, PubMed:29395066). May negatively regulate inflammatory and pathogen recognition signaling in innate immune response. Upon phosphorylation at Ser-202 and Ser-204 residues, via IL-1 receptor and Toll-like receptor …	3	Q01804	4.5	3.75	0	0	0	0	0	0	0	0	0	0	0	0	0	0	0	0	0	0	0	0	0	0	0	0	0	0	0	0	0	0
P41212	ETV6	5	28	1.21383		TNR6B	Q9UPQ9	Trinucleotide repeat-containing gene 6B protein	FUNCTION: Plays a role in RNA-mediated gene silencing by both micro-RNAs (miRNAs) and short interfering RNAs (siRNAs). Required for miRNA-dependent translational repression and siRNA-dependent endonucleolytic cleavage of complementary mRNAs by argonaute family proteins. As scaffoldng protein associates with argonaute proteins bound to partially complementary mRNAs and simultaneously can recruit C…	4	Q9UPQ9	49.25	23	22.5	10	0	0	0	0	0	0	0	0	0	0	0	0	0	0	0	0	0	0	0	0	0	0	0	0	0	0	0	0
Q8TDD2	SP7	4	42.5	1.84242		CEP85	Q6P2H3	Centrosomal protein of 85 kDa (Cep85) (Coiled-coil domain-containing protein 21)	FUNCTION: Acts as a negative regulator of NEK2 to maintain the centrosome integrity in interphase. Suppresses centrosome disjunction by inhibiting NEK2 kinase activity (PubMed:26220856). {ECO:0000269|PubMed:26220856}.	5	Q6P2H3	31.5	18	3.25	7	0	0	0	0	0	0	0	0	0	0	0	0	0	0	0	0	0	0	0	0	0	0	0	0	0	0	0	0
Q9NP62	GCM1	3	6.5	0.281782		ANKH1	Q8IWZ3	Ankyrin repeat and KH domain-containing protein 1 (HIV-1 Vpr-binding ankyrin repeat protein) (Multiple ankyrin repeats single KH domain) (hMASK)	FUNCTION: May play a role as a scaffolding protein that may be associated with the abnormal phenotype of leukemia cells. Isoform 2 may possess an antiapoptotic effect and protect cells during normal cell survival through its regulation of caspases. {ECO:0000269|PubMed:16098192}.	6	Q8IWZ3	107.75	49	24.5	0	0	0	0	0	0	0	0	0	0	0	0	0	0	0	0	0	0	0	0	0	0	0	0	0	0	0	0	0
P23771	GATA3	3	31.25	1.35472		YTHD2	Q9Y5A9	YTH domain-containing family protein 2 (CLL-associated antigen KW-14) (High-glucose-regulated protein 8) (Renal carcinoma antigen NY-REN-2)	FUNCTION: Specifically recognizes and binds N6-methyladenosine (m6A)-containing RNAs, and regulates mRNA stability (PubMed:24284625, PubMed:26046440, PubMed:26318451). M6A is a modification present at internal sites of mRNAs and some non-coding RNAs and plays a role in mRNA stability and processing (PubMed:22575960, PubMed:24284625, PubMed:25412658, PubMed:25412661). Acts as a regulator of mRNA s…	7	Q9Y5A9	15.75	5.5	0	0	0	0	2	2	0	0	0	0	0	0	0	0	0	0	0	0	0	0	0	0	0	0	0	0	0	0	0	0
Q2M1V0	ISX	3	6	0.260106		MAGD1	Q9Y5V3	Melanoma-associated antigen D1 (MAGE tumor antigen CCF) (MAGE-D1 antigen) (Neurotrophin receptor-interacting MAGE homolog)	FUNCTION: Involved in the apoptotic response after nerve growth factor (NGF) binding in neuronal cells. Inhibits cell cycle progression, and facilitates NGFR-mediated apoptosis. May act as a regulator of the function of DLX family members. May enhance ubiquitin ligase activity of RING-type zinc finger-containing E3 ubiquitin-protein ligases. Proposed to act through recruitment and/or stabilizatio…	8	Q9Y5V3	7	2.75	0	0	0	0	0	0	0	0	0	0	0	0	0	0	0	0	0	0	0	0	0	0	0	0	0	0	0	0	0	0
P26367	PAX6	2	6	0.260106		ANR17	O75179	Ankyrin repeat domain-containing protein 17 (Gene trap ankyrin repeat protein) (Serologically defined breast cancer antigen NY-BR-16)	FUNCTION: Could play pivotal roles in cell cycle and DNA regulation (PubMed:19150984). Involved in innate immune defense against viruse by positively regulating the viral dsRNA receptors DDX58 and IFIH1 signaling pathways (PubMed:22328336). Involves in NOD2- and NOD1-mediated responses to bacteria suggesting a role in innate antibacterial immune pathways too (PubMed:23711367). Target of enterovir…	9	O75179	53.5	21	0	0	0	0	0	0	0	0	0	0	0	0	0	0	0	0	0	0	0	0	0	0	0	0	0	0	0	0	0	0
O43763	TLX2	2	8	0.346808		YTHD1	Q9BYJ9	YTH domain-containing family protein 1 (Dermatomyositis associated with cancer putative autoantigen 1) (DACA-1)	FUNCTION: Specifically recognizes and binds N6-methyladenosine (m6A)-containing mRNAs, and promotes mRNA translation efficiency (PubMed:24284625, PubMed:26046440, PubMed:26318451). M6A is a modification present at internal sites of mRNAs and some non-coding RNAs and plays a role in the efficiency of mRNA splicing, processing and stability (PubMed:24284625). Acts as a regulator of mRNA translation…	10	Q9BYJ9	13.75	3.5	0	0	0	0	2	2	0	0	0	0	0	0	0	0	0	0	0	0	0	0	0	0	0	0	0	0	0	0	0	0
P20823	HNF1A	2	80.75	3.5006		UBP54	Q70EL1	Inactive ubiquitin carboxyl-terminal hydrolase 54 (Inactive ubiquitin-specific peptidase 54)	FUNCTION: Has no peptidase activity.	11	Q70EL1	2.5	0	0	0	0	0	0	0	0	0	0	0	0	0	0	0	0	0	0	0	0	0	0	0	0	0	0	0	0	0	0	0
O60248	SOX15	2	17.5	0.758643		RBMS1	P29558	RNA-binding motif, single-stranded-interacting protein 1 (Single-stranded DNA-binding protein MSSP-1) (Suppressor of CDC2 with RNA-binding motif 2)	FUNCTION: Single-stranded DNA binding protein that interacts with the region upstream of the MYC gene. Binds specifically to the DNA sequence motif 5'-[AT]CT[AT][AT]T-3'. Probably has a role in DNA replication.	12	P29558	2	0	0	0	0	0	0	0	0	0	0	0	0	0	0	0	0	0	0	0	0	0	0	0	0	0	0	0	0	0	0	0
Q13887	KLF5	2	9.5	0.411835		GTPB1	O00178	GTP-binding protein 1 (G-protein 1) (GP-1) (GP1)	FUNCTION: Promotes degradation of target mRNA species. Plays a role in the regulation of circadian mRNA stability. Binds GTP and has GTPase activity (By similarity). {ECO:0000250}.	13	O00178	2.5	0	0	0	0	0	0	0	0	0	0	0	0	0	0	0	0	0	0	0	0	0	0	0	0	0	0	0	0	0	0	0
Q9BXG8	SPZ1	1	9.5	0.411835		LARP4	Q71RC2	La-related protein 4 (La ribonucleoprotein domain family member 4)	FUNCTION: RNA binding protein that binds to the poly-A tract of mRNA molecules (PubMed:21098120). Associates with the 40S ribosomal subunit and with polysomes (PubMed:21098120). Plays a role in the regulation of mRNA translation (PubMed:21098120). Plays a role in the regulation of cell morphology and cytoskeletal organization (PubMed:21834987, PubMed:27615744). {ECO:0000269|PubMed:21098120, ECO:0…	14	Q71RC2	3.5	0	0	0	0	0	0	0	0	0	0	0	0	0	0	0	0	0	0	0	0	0	0	0	0	0	0	0	0	0	0	0
P16220	CREB1	1	21	0.910372		K1671	Q9BY89	Uncharacterized protein KIAA1671		15	Q9BY89	7.25	0	0	4	0	0	0	0	0	0	0	0	0	0	0	0	0	0	0	0	0	0	0	0	0	0	0	0	0	0	0	0
Q9UIH9	KLF15	1	4	0.173404		CNOT9	Q92600	CCR4-NOT transcription complex subunit 9 (Cell differentiation protein RQCD1 homolog) (Rcd-1)	FUNCTION: Component of the CCR4-NOT complex which is one of the major cellular mRNA deadenylases and is linked to various cellular processes including bulk mRNA degradation, miRNA-mediated repression, translational repression during translational initiation and general transcription regulation. Additional complex functions may be a consequence of its influence on mRNA expression. Involved in down…	16	Q92600	11	0	2.25	3	0	0	0	0	0	0	0	0	0	0	0	0	0	0	0	2.5	0	0	0	0	0	0	0	0	0	0	0	0
Q969G2	LHX4	1	5.5	0.238431		CNOT3	O75175	CCR4-NOT transcription complex subunit 3 (CCR4-associated factor 3) (Leukocyte receptor cluster member 2)	FUNCTION: Component of the CCR4-NOT complex which is one of the major cellular mRNA deadenylases and is linked to various cellular processes including bulk mRNA degradation, miRNA-mediated repression, translational repression during translational initiation and general transcription regulation. Additional complex functions may be a consequence of its influence on mRNA expression. May be involved …	17	O75175	20	2.75	3.5	0	0	0	0	0	0	0	0	0	0	0	0	0	0	0	0	0	0	0	0	0	0	0	0	0	0	0	0	0
P15976	GATA1	1	8.25	0.357646		CNOT1	A5YKK6	CCR4-NOT transcription complex subunit 1 (CCR4-associated factor 1) (Negative regulator of transcription subunit 1 homolog) (NOT1H) (hNOT1)	FUNCTION: Scaffolding component of the CCR4-NOT complex which is one of the major cellular mRNA deadenylases and is linked to various cellular processes including bulk mRNA degradation, miRNA-mediated repression, translational repression during translational initiation and general transcription regulation. Additional complex functions may be a consequence of its influence on mRNA expression. Its …	18	A5YKK6	89.75	6	9.25	0	0	0	0	0	0	0	0	0	0	0	0	0	0	0	0	0	0	0	0	0	0	6	0	0	0	0	0	0
Q06710	PAX8	1	3	0.130053		TNR6A	Q8NDV7	Trinucleotide repeat-containing gene 6A protein (CAG repeat protein 26) (EMSY interactor protein) (GW182 autoantigen) (Protein GW1) (Glycine-tryptophan protein of 182 kDa)	FUNCTION: Plays a role in RNA-mediated gene silencing by both micro-RNAs (miRNAs) and short interfering RNAs (siRNAs). Required for miRNA-dependent repression of translation and for siRNA-dependent endonucleolytic cleavage of complementary mRNAs by argonaute family proteins. As a scaffolding protein, associates with argonaute proteins bound to partially complementary mRNAs, and can simultaneously…	19	Q8NDV7	25.5	2.75	0	0	0	0	2	0	0	0	0	0	0	0	0	0	0	0	0	0	0	0	0	0	0	0	0	0	0	0	0	0
P43268	ETV4	1	2.5	0.108378		4ET	Q9NRA8	Eukaryotic translation initiation factor 4E transporter (4E-T) (eIF4E transporter) (Eukaryotic translation initiation factor 4E nuclear import factor 1)	FUNCTION: Nucleoplasmic shuttling protein, which inhibits translation initiation. Mediates the nuclear import of EIF4E by a piggy-back mechanism. {ECO:0000269|PubMed:10856257}.	20	Q9NRA8	45.25	4.25	0	0	0	0	0	0	0	0	0	0	0	0	0	0	0	0	0	0	0	0	0	0	0	0	0	0	0	0	0	0
P11308	ERG	1	7	0.303457		CNO10	Q9H9A5	CCR4-NOT transcription complex subunit 10	FUNCTION: Component of the CCR4-NOT complex which is one of the major cellular mRNA deadenylases and is linked to various cellular processes including bulk mRNA degradation, miRNA-mediated repression, translational repression during translational initiation and general transcription regulation. Additional complex functions may be a consequence of its influence on mRNA expression. Is not required …	21	Q9H9A5	18.5	0	0	0	0	0	0	0	0	0	0	0	0	0	0	0	0	0	0	0	0	0	0	0	0	0	0	0	0	0	0	0
Q15306	IRF4	1	2	0.0867021		UBAP2	Q5T6F2	Ubiquitin-associated protein 2 (UBAP-2)		22	Q5T6F2	27.25	0	0	0	0	0	0	0	0	0	0	0	0	0	0	0	0	0	0	0	0	0	0	0	0	0	0	0	0	0	0	0
P23769	GATA2	1	3	0.130053		CNOT2	Q9NZN8	CCR4-NOT transcription complex subunit 2 (CCR4-associated factor 2)	FUNCTION: Component of the CCR4-NOT complex which is one of the major cellular mRNA deadenylases and is linked to various cellular processes including bulk mRNA degradation, miRNA-mediated repression, translational repression during translational initiation and general transcription regulation. Additional complex functions may be a consequence of its influence on mRNA expression. Required for the…	23	Q9NZN8	17	0	0	0	0	0	0	0	0	0	0	0	0	0	0	0	0	0	0	0	0	0	0	0	0	0	0	0	0	0	0	0
P55771	PAX9	1	9	0.390159		CPEB1	Q9BZB8	Cytoplasmic polyadenylation element-binding protein 1 (CPE-BP1) (CPE-binding protein 1) (h-CPEB) (hCPEB-1)	FUNCTION: Sequence-specific RNA-binding protein that regulates mRNA cytoplasmic polyadenylation and translation initiation during oocyte maturation, early development and at postsynapse sites of neurons. Binds to the cytoplasmic polyadenylation element (CPE), an uridine-rich sequence element (consensus sequence 5'-UUUUUAU-3') within the mRNA 3'-UTR. RNA binding results in a clear conformational c…	24	Q9BZB8	227	0	0	0	0	0	0	0	0	0	0	0	0	0	0	0	0	0	0	0	0	0	0	0	0	0	0	0	0	0	0	0
P35680	HNF1B	1	2.5	0.108378		CNOT8	Q9UFF9	CCR4-NOT transcription complex subunit 8 (EC 3.1.13.4) (CAF1-like protein) (CALIFp) (CAF2) (CCR4-associated factor 8) (Caf1b)	FUNCTION: Has 3'-5' poly(A) exoribonuclease activity for synthetic poly(A) RNA substrate. Its function seems to be partially redundant with that of CNOT7. Catalytic component of the CCR4-NOT complex which is linked to various cellular processes including bulk mRNA degradation, miRNA-mediated repression, translational repression during translational initiation and general transcription regulation.…	25	Q9UFF9	3	0	0	0	0	0	0	0	0	0	0	0	0	0	0	0	0	0	0	0	0	0	0	0	0	0	0	0	0	0	0	0
P48431	SOX2	1	2	0.0867021		ATX2	Q99700	Ataxin-2 (Spinocerebellar ataxia type 2 protein) (Trinucleotide repeat-containing gene 13 protein)	FUNCTION: Involved in EGFR trafficking, acting as negative regulator of endocytic EGFR internalization at the plasma membrane. {ECO:0000269|PubMed:18602463}.	26	Q99700	29	0	0	0	0	0	0	0	0	0	0	0	0	0	0	0	0	0	0	0	0	0	0	0	0	0	0	0	0	0	0	0
Q02575	NHLH1	1	6	0.260106		RN214	Q8ND24	RING finger protein 214		27	Q8ND24	6.5	0	0	0	0	0	0	0	0	0	0	0	0	0	0	0	0	0	0	0	0	0	0	0	0	0	0	0	0	0	0	0
Q14765	STAT4	1	5	0.216755		GGYF2	Q6Y7W6	GRB10-interacting GYF protein 2 (PERQ amino acid-rich with GYF domain-containing protein 2) (Trinucleotide repeat-containing gene 15 protein)	FUNCTION: Key component of the 4EHP-GYF2 complex, a multiprotein complex that acts as a repressor of translation initiation (PubMed:22751931). In 4EHP-GYF2 the complex, acts as a factor that bridges EIF4E2 to ZFP36/TTP, linking translation repression with mRNA decay (By similarity). May act cooperatively with GRB10 to regulate tyrosine kinase receptor signaling, including IGF1 and insulin recepto…	28	Q6Y7W6	32	0	0	0	0	0	0	0	0	0	0	0	0	0	0	0	0	0	0	0	0	0	0	0	0	0	0	0	0	0	0	0
Q12952	FOXL1	1	3.5	0.151729		MYCBP	Q99417	c-Myc-binding protein (Associate of Myc 1) (AMY-1)	FUNCTION: May control the transcriptional activity of MYC. Stimulates the activation of E box-dependent transcription by MYC.	29	Q99417	6.25	0	0	0	0	0	0	0	0	0	0	0	0	0	0	0	0	0	0	0	0	0	0	0	0	0	0	0	0	0	0	0
Q9Y4X4	KLF12	1	6.5	0.281782		XRN1	Q8IZH2	5'-3' exoribonuclease 1 (EC 3.1.13.-) (Strand-exchange protein 1 homolog)	FUNCTION: Major 5'-3' exoribonuclease involved in mRNA decay. Required for the 5'-3'-processing of the G4 tetraplex-containing DNA and RNA substrates. The kinetic of hydrolysis is faster for G4 RNA tetraplex than for G4 DNA tetraplex and monomeric RNA tetraplex. Binds to RNA and DNA (By similarity). Plays a role in replication-dependent histone mRNA degradation. May act as a tumor suppressor prot…	30	Q8IZH2	43.5	0	0	0	0	0	0	0	0	0	0	0	0	0	0	0	0	0	0	0	0	0	0	0	0	0	0	0	0	0	0	0
Q99594	TEAD3	1	6	0.260106		C2D1A	Q6P1N0	Coiled-coil and C2 domain-containing protein 1A (Akt kinase-interacting protein 1) (Five prime repressor element under dual repression-binding protein 1) (FRE under dual repression-binding protein 1) (Freud-1) (Putative NF-kappa-B-activating protein 023N)	FUNCTION: Transcription factor that binds specifically to the DRE (dual repressor element) and represses HTR1A gene transcription in neuronal cells. The combination of calcium and ATP specifically inactivates the binding with FRE. May play a role in the altered regulation of HTR1A associated with anxiety and major depression. Mediates HDAC-independent repression of HTR1A promoter in neuronal cell…	31	Q6P1N0	4	0	0	0	0	0	0	0	0	0	0	0	0	0	0	0	0	0	0	0	0	0	0	0	0	0	0	0	0	0	0	0
Q99581	FEV	1	3.5	0.151729		PAN3	Q58A45	PAN2-PAN3 deadenylation complex subunit PAN3 (PAB1P-dependent poly(A)-specific ribonuclease) (Poly(A)-nuclease deadenylation complex subunit 3) (PAN deadenylation complex subunit 3)	FUNCTION: Regulatory subunit of the poly(A)-nuclease (PAN) deadenylation complex, one of two cytoplasmic mRNA deadenylases involved in general and miRNA-mediated mRNA turnover. PAN specifically shortens poly(A) tails of RNA and the activity is stimulated by poly(A)-binding protein (PABP). PAN deadenylation is followed by rapid degradation of the shortened mRNA tails by the CCR4-NOT complex. Deade…	32	Q58A45	4	0	0	0	0	0	0	0	0	0	0	0	0	0	0	0	0	0	0	0	0	0	0	0	0	0	0	0	0	0	0	0
						AGO1	Q9UL18	Protein argonaute-1 (Argonaute1) (hAgo1) (Argonaute RISC catalytic component 1) (Eukaryotic translation initiation factor 2C 1) (eIF-2C 1) (eIF2C 1) (Putative RNA-binding protein Q99)	FUNCTION: Required for RNA-mediated gene silencing (RNAi). Binds to short RNAs such as microRNAs (miRNAs) or short interfering RNAs (siRNAs), and represses the translation of mRNAs which are complementary to them. Lacks endonuclease activity and does not appear to cleave target mRNAs. Also required for transcriptional gene silencing (TGS) of promoter regions which are complementary to bound short…	33	Q9UL18	8.75	0	0	0	0	0	0	0	0	0	0	0	0	0	0	0	0	0	0	0	0	0	0	0	0	0	0	0	0	0	0	0
						RC3H1	Q5TC82	Roquin-1 (Roquin) (EC 2.3.2.27) (RING finger and C3H zinc finger protein 1) (RING finger and CCCH-type zinc finger domain-containing protein 1) (RING finger protein 198)	FUNCTION: Post-transcriptional repressor of mRNAs containing a conserved stem loop motif, called constitutive decay element (CDE), which is often located in the 3'-UTR, as in HMGXB3, ICOS, IER3, NFKBID, NFKBIZ, PPP1R10, TNF, TNFRSF4 and in many more mRNAs (PubMed:25026078). Cleaves translationally inactive mRNAs harboring a stem-loop (SL), often located in their 3'-UTRs, during the early phase of…	34	Q5TC82	12.75	0	0	0	0	0	0	0	0	0	0	0	0	0	0	0	0	0	0	0	0	0	0	0	0	0	0	0	0	0	0	0
						CNO11	Q9UKZ1	CCR4-NOT transcription complex subunit 11	FUNCTION: Component of the CCR4-NOT complex which is one of the major cellular mRNA deadenylases and is linked to various cellular processes including bulk mRNA degradation, miRNA-mediated repression, translational repression during translational initiation and general transcription regulation. Additional complex functions may be a consequence of its influence on mRNA expression. Is required for …	35	Q9UKZ1	9.5	0	0	0	0	0	0	0	0	0	0	0	0	0	0	0	0	0	0	0	0	0	0	0	0	0	0	0	0	0	0	0
						EDC3	Q96F86	Enhancer of mRNA-decapping protein 3 (LSM16 homolog) (YjeF N-terminal domain-containing protein 2) (YjeF_N2) (hYjeF_N2) (YjeF domain-containing protein 1)	FUNCTION: Binds single-stranded RNA. Involved in the process of mRNA degradation and in the positive regulation of mRNA decapping. May play a role in spermiogenesis and oogenesis. {ECO:0000269|PubMed:16364915, ECO:0000269|PubMed:17533573, ECO:0000269|PubMed:18678652, ECO:0000269|PubMed:25701870}.	36	Q96F86	21.25	0	0	0	0	0	0	0	0	0	0	0	0	0	0	0	0	0	0	0	0	0	0	0	0	0	0	0	0	0	0	0
						LAR4B	Q92615	La-related protein 4B (La ribonucleoprotein domain family member 4B) (La ribonucleoprotein domain family member 5) (La-related protein 5)	FUNCTION: Stimulates mRNA translation. {ECO:0000269|PubMed:20573744}.	37	Q92615	5.25	0	0	0	0	0	0	0	0	0	0	0	0	0	0	0	0	0	0	0	0	0	0	0	0	0	0	0	0	0	0	0
						SMG7	Q92540	Protein SMG7 (EST1-like protein C) (SMG-7 homolog) (hSMG-7)	FUNCTION: Plays a role in nonsense-mediated mRNA decay. Recruits UPF1 to cytoplasmic mRNA decay bodies. Together with SMG5 is thought to provide a link to the mRNA degradation machinery involving exonucleolytic pathways, and to serve as an adapter for UPF1 to protein phosphatase 2A (PP2A), thereby triggering UPF1 dephosphorylation. {ECO:0000269|PubMed:15546618, ECO:0000269|PubMed:15721257}.	38	Q92540	21.5	0	0	0	0	0	0	0	0	0	0	0	0	0	5	0	0	0	0	0	0	0	0	0	0	0	0	0	0	0	0	0
						TNR6C	Q9HCJ0	Trinucleotide repeat-containing gene 6C protein	FUNCTION: Plays a role in RNA-mediated gene silencing by micro-RNAs (miRNAs). Required for miRNA-dependent translational repression of complementary mRNAs by argonaute family proteins. As scaffoldng protein associates with argonaute proteins bound to partially complementary mRNAs and simultaneously can recruit CCR4-NOT and PAN deadenylase complexes. {ECO:0000269|PubMed:19304925, ECO:0000269|PubMe…	39	Q9HCJ0	14.25	0	0	4	0	0	0	0	0	0	0	0	0	0	0	0	0	0	0	0	0	0	0	0	0	0	0	0	0	0	0	0
						TTC31	Q49AM3	Tetratricopeptide repeat protein 31 (TPR repeat protein 31)		40	Q49AM3	5	0	0	0	0	0	0	0	0	0	0	0	0	0	0	0	0	0	0	0	0	0	0	0	0	0	0	0	0	0	0	0
						SMAP2	Q8WU79	Stromal membrane-associated protein 2 (Stromal membrane-associated protein 1-like)	FUNCTION: GTPase activating protein that acts on ARF1. Can also activate ARF6 (in vitro). May play a role in clathrin-dependent retrograde transport from early endosomes to the trans-Golgi network (By similarity). {ECO:0000250}.	41	Q8WU79	8.5	0	0	0	0	0	0	0	0	0	0	0	0	0	0	0	0	0	0	0	0	0	0	0	0	0	0	0	0	0	0	0
						CNOT7	Q9UIV1	CCR4-NOT transcription complex subunit 7 (EC 3.1.13.4) (BTG1-binding factor 1) (CCR4-associated factor 1) (CAF-1) (Caf1a)	FUNCTION: Has 3'-5' poly(A) exoribonuclease activity for synthetic poly(A) RNA substrate. Its function seems to be partially redundant with that of CNOT8. Catalytic component of the CCR4-NOT complex which is one of the major cellular mRNA deadenylases and is linked to various cellular processes including bulk mRNA degradation, miRNA-mediated repression, translational repression during translation…	42	Q9UIV1	5	0	0	0	0	0	0	0	0	0	0	0	0	0	0	0	0	0	0	0	0	0	0	0	0	0	0	0	0	0	0	0
						R3HD1	Q15032	R3H domain-containing protein 1		43	Q15032	7.25	0	0	0	0	0	0	0	0	0	0	0	0	0	0	0	0	0	0	0	0	0	0	0	0	0	0	0	0	0	0	0
						RACK1	P63244	Receptor of activated protein C kinase 1 (Cell proliferation-inducing gene 21 protein) (Guanine nucleotide-binding protein subunit beta-2-like 1) (Guanine nucleotide-binding protein subunit beta-like protein 12.3) (Human lung cancer oncogene 7 protein) (HLC-7) (Receptor for activated C kinase) (Small ribosomal subunit protein RACK1) [Cleaved into: Receptor of activated protein C kinase 1, N-termi…	FUNCTION: Scaffolding protein involved in the recruitment, assembly and/or regulation of a variety of signaling molecules. Interacts with a wide variety of proteins and plays a role in many cellular processes. Component of the 40S ribosomal subunit involved in translational repression (PubMed:23636399). Involved in the initiation of the ribosome quality control (RQC), a pathway that takes place w…	44	P63244	7.5	0	0	0	0	0	0	0	0	0	0	0	0	0	0	0	0	0	0	0	0	0	0	0	0	0	0	0	0	0	0	0
						PATL1	Q86TB9	Protein PAT1 homolog 1 (PAT1-like protein 1) (Protein PAT1 homolog b) (Pat1b) (hPat1b)	FUNCTION: RNA-binding protein involved in deadenylation-dependent decapping of mRNAs, leading to the degradation of mRNAs. Acts as a scaffold protein that connects deadenylation and decapping machinery. Required for cytoplasmic mRNA processing body (P-body) assembly. In case of infection, required for translation and replication of hepatitis C virus (HCV). {ECO:0000269|PubMed:17936923, ECO:000026…	45	Q86TB9	12.5	0	0	0	0	0	0	0	0	0	0	0	0	0	0	0	0	0	0	0	0	0	0	0	0	0	0	0	0	0	0	0
						UNK	Q9C0B0	RING finger protein unkempt homolog (Zinc finger CCCH domain-containing protein 5)	FUNCTION: Sequence-specific RNA-binding protein which plays an important role in the establishment and maintenance of the early morphology of cortical neurons during embryonic development. Acts as a translation repressor and controls a translationally regulated cell morphology program to ensure proper structuring of the nervous system. Translational control depends on recognition of its binding e…	46	Q9C0B0	13	0	0	0	0	0	0	0	0	0	0	0	0	0	0	0	0	0	0	0	0	0	0	0	0	0	0	0	0	0	0	0
						DCP1B	Q8IZD4	mRNA-decapping enzyme 1B (EC 3.-.-.-)	FUNCTION: May play a role in the degradation of mRNAs, both in normal mRNA turnover and in nonsense-mediated mRNA decay. May remove the 7-methyl guanine cap structure from mRNA molecules, yielding a 5'-phosphorylated mRNA fragment and 7m-GDP (By similarity). {ECO:0000250}.	47	Q8IZD4	24	0	0	0	0	0	0	0	0	0	0	0	0	0	0	0	0	0	0	0	0	0	0	0	0	0	0	0	0	0	0	0
						CC85C	A6NKD9	Coiled-coil domain-containing protein 85C	FUNCTION: May play an important role in cortical development, especially in the maintenance of radial glia. {ECO:0000250}.	48	A6NKD9	5.5	0	0	0	0	0	0	0	0	0	0	0	0	0	0	0	0	0	0	0	0	0	0	0	0	0	0	0	0	0	0	0
						PRC2A	P48634	Protein PRRC2A (HLA-B-associated transcript 2) (Large proline-rich protein BAT2) (Proline-rich and coiled-coil-containing protein 2A) (Protein G2)	FUNCTION: May play a role in the regulation of pre-mRNA splicing. {ECO:0000269|PubMed:14667819}.	49	P48634	108.75	0	0	0	0	0	0	0	0	0	0	0	0	0	0	0	0	0	0	0	0	0	0	0	0	0	0	0	0	0	0	0
						UBP2L	Q14157	Ubiquitin-associated protein 2-like (Protein NICE-4)	FUNCTION: Plays an important role in the activity of long-term repopulating hematopoietic stem cells (LT-HSCs). {ECO:0000250|UniProtKB:Q80X50}.	50	Q14157	53	0	0	0	0	0	0	0	0	0	0	0	0	0	0	0	0	0	0	0	0	0	0	0	0	0	0	0	0	0	0	0
						PRC2C	Q9Y520	Protein PRRC2C (BAT2 domain-containing protein 1) (HBV X-transactivated gene 2 protein) (HBV XAg-transactivated protein 2) (HLA-B-associated transcript 2-like 2) (Proline-rich and coiled-coil-containing protein 2C)		51	Q9Y520	91.75	0	0	0	0	0	0	0	0	0	0	0	0	0	0	0	0	0	0	0	0	0	0	0	0	0	0	0	0	0	0	0
						YTHD3	Q7Z739	YTH domain-containing family protein 3	FUNCTION: Specifically recognizes and binds N6-methyladenosine (m6A)-containing RNAs and promotes RNA translation efficiency (PubMed:28106072, PubMed:28106076, PubMed:28281539). M6A is a modification present at internal sites of mRNAs and some non-coding RNAs and plays a role in the efficiency of mRNA splicing, processing and stability (PubMed:22575960, PubMed:24284625, PubMed:28106072, PubMed:28…	52	Q7Z739	10.75	0	0	0	0	0	0	0	0	0	0	0	0	0	0	0	0	0	0	0	0	0	0	0	0	0	0	0	0	0	0	0
						ELAV1	Q15717	ELAV-like protein 1 (Hu-antigen R) (HuR)	FUNCTION: RNA-binding protein that binds to the 3'-UTR region of mRNAs and increases their stability (PubMed:14517288, PubMed:18285462). Involved in embryonic stem cells (ESCs) differentiation: preferentially binds mRNAs that are not methylated by N6-methyladenosine (m6A), stabilizing them, promoting ESCs differentiation (By similarity). Binds to poly-U elements and AU-rich elements (AREs) in the…	53	Q15717	2.25	0	0	0	0	0	0	0	0	0	0	0	0	0	0	0	0	0	0	0	0	0	0	0	0	0	0	0	0	0	0	0
						IF2B2	Q9Y6M1	Insulin-like growth factor 2 mRNA-binding protein 2 (IGF2 mRNA-binding protein 2) (IMP-2) (Hepatocellular carcinoma autoantigen p62) (IGF-II mRNA-binding protein 2) (VICKZ family member 2)	FUNCTION: RNA-binding factor that recruits target transcripts to cytoplasmic protein-RNA complexes (mRNPs). This transcript 'caging' into mRNPs allows mRNA transport and transient storage. It also modulates the rate and location at which target transcripts encounter the translational apparatus and shields them from endonuclease attacks or microRNA-mediated degradation (By similarity). Binds to th…	54	Q9Y6M1	7.5	0	0	0	0	0	0	0	0	0	0	0	0	0	0	0	0	0	0	0	0	0	0	0	0	0	0	0	0	0	0	0
						MCRI2	Q9BUT9	MAPK regulated corepressor interacting protein 2 (Protein FAM195A)		55	Q9BUT9	10.25	0	0	0	0	0	0	0	0	0	0	0	0	0	0	0	0	0	0	0	0	0	0	0	0	0	0	0	0	0	0	0
						PFD1	O60925	Prefoldin subunit 1	FUNCTION: Binds specifically to cytosolic chaperonin (c-CPN) and transfers target proteins to it. Binds to nascent polypeptide chain and promotes folding in an environment in which there are many competing pathways for nonnative proteins.	56	O60925	3	0	0	0	0	0	0	0	0	0	0	0	0	0	0	0	0	0	0	0	0	0	0	0	0	0	0	0	0	0	0	0
						AGO3	Q9H9G7	Protein argonaute-3 (Argonaute3) (hAgo3) (EC 3.1.26.n2) (Argonaute RISC catalytic component 3) (Eukaryotic translation initiation factor 2C 3) (eIF-2C 3) (eIF2C 3)	FUNCTION: Required for RNA-mediated gene silencing (RNAi). Binds to short RNAs such as microRNAs (miRNAs) and represses the translation of mRNAs which are complementary to them. Proposed to be involved in stabilization of small RNA derivates (riRNA) derived from processed RNA polymerase III-transcribed Alu repeats containing a DR2 retinoic acid response element (RARE) in stem cells and in the sub…	57	Q9H9G7	5.25	0	0	0	0	0	0	0	0	0	0	0	0	0	0	0	0	0	0	0	0	0	0	0	0	0	0	0	0	0	0	0
						ASPP1	Q96KQ4	Apoptosis-stimulating of p53 protein 1 (Protein phosphatase 1 regulatory subunit 13B)	FUNCTION: Regulator that plays a central role in regulation of apoptosis via its interaction with p53/TP53. Regulates TP53 by enhancing the DNA binding and transactivation function of TP53 on the promoters of proapoptotic genes in vivo. {ECO:0000269|PubMed:11684014}.	58	Q96KQ4	4.25	0	0	0	0	0	0	0	0	0	0	0	0	0	0	0	0	0	0	0	0	0	0	0	0	0	0	0	0	0	0	0
						LS14B	Q9BX40	Protein LSM14 homolog B (Protein FAM61B) (RNA-associated protein 55B) (hRAP55B)	FUNCTION: May play a role in control of mRNA translation. {ECO:0000250}.	59	Q9BX40	4.75	0	0	0	0	0	0	0	0	0	0	0	0	0	0	0	0	0	0	0	0	0	0	0	0	0	0	0	0	0	0	0
						MARF1	Q9Y4F3	Meiosis regulator and mRNA stability factor 1 (Limkain-b1) (Meiosis arrest female protein 1)	FUNCTION: Essential regulator of oogenesis required for female meiotic progression to repress transposable elements and preventing their mobilization, which is essential for the germline integrity. Probably acts via some RNA metabolic process, equivalent to the piRNA system in males, which mediates the repression of transposable elements during meiosis by forming complexes composed of RNAs and go…	60	Q9Y4F3	4.75	0	0	0	0	0	0	0	0	0	0	0	0	0	0	0	0	0	0	0	0	0	0	0	0	0	0	0	0	0	0	0
						PUM2	Q8TB72	Pumilio homolog 2 (Pumilio-2)	FUNCTION: Sequence-specific RNA-binding protein that acts as a post-transcriptional repressor by binding the 3'-UTR of mRNA targets. Binds to an RNA consensus sequence, the Pumilio Response Element (PRE), 5'-UGUANAUA-3', that is related to the Nanos Response Element (NRE) (, PubMed:21397187). Mediates post-transcriptional repression of transcripts via different mechanisms: acts via direct recruit…	61	Q8TB72	3.5	0	0	0	0	0	0	0	0	0	0	0	0	0	0	0	0	0	0	0	0	0	0	0	0	0	0	0	0	0	0	0
						HELZ	P42694	Probable helicase with zinc finger domain (EC 3.6.4.-) (Down-regulated in human cancers protein)	FUNCTION: May act as a helicase that plays a role in RNA metabolism in multiple tissues and organs within the developing embryo.	62	P42694	6.5	0	0	0	0	0	0	0	0	0	0	0	0	0	0	0	0	0	0	0	0	0	0	0	0	0	0	0	0	0	0	0
						PUM1	Q14671	Pumilio homolog 1 (HsPUM) (Pumilio-1)	FUNCTION: Sequence-specific RNA-binding protein that acts as a post-transcriptional repressor by binding the 3'-UTR of mRNA targets. Binds to an RNA consensus sequence, the Pumilio Response Element (PRE), 5'-UGUANAUA-3', that is related to the Nanos Response Element (NRE) (PubMed:21572425, PubMed:18328718, PubMed:21653694, PubMed:21397187). Mediates post-transcriptional repression of transcripts …	63	Q14671	15	0	0	0	0	0	0	0	0	0	0	0	0	0	0	0	0	0	0	0	0	0	0	0	0	0	0	0	0	0	0	0
						ZCCHV	Q7Z2W4	Zinc finger CCCH-type antiviral protein 1 (ADP-ribosyltransferase diphtheria toxin-like 13) (ARTD13) (Zinc finger CCCH domain-containing protein 2) (Zinc finger antiviral protein) (ZAP)	FUNCTION: Antiviral protein which inhibits the replication of viruses by recruiting the cellular RNA degradation machineries to degrade the viral mRNAs. Binds to a ZAP-responsive element (ZRE) present in the target viral mRNA, recruits cellular poly(A)-specific ribonuclease PARN to remove the poly(A) tail, and the 3'-5' exoribonuclease complex exosome to degrade the RNA body from the 3'-end. It a…	64	Q7Z2W4	14.75	0	0	0	0	0	0	0	0	0	0	0	0	0	0	0	0	0	0	0	0	0	0	0	0	0	0	0	0	0	0	0
						K0355	O15063	Uncharacterized protein KIAA0355		65	O15063	12	0	0	0	0	0	0	0	0	0	0	0	0	0	0	0	0	0	0	0	0	0	0	0	0	0	0	0	0	0	0	0
						IRAK1	P51617	Interleukin-1 receptor-associated kinase 1 (IRAK-1) (EC 2.7.11.1)	FUNCTION: Serine/threonine-protein kinase that plays a critical role in initiating innate immune response against foreign pathogens. Involved in Toll-like receptor (TLR) and IL-1R signaling pathways. Is rapidly recruited by MYD88 to the receptor-signaling complex upon TLR activation. Association with MYD88 leads to IRAK1 phosphorylation by IRAK4 and subsequent autophosphorylation and kinase activ…	66	P51617	6.75	0	0	0	0	0	0	0	0	0	0	0	0	0	0	0	0	0	0	0	0	0	0	0	0	0	0	0	0	0	0	0
						SMG5	Q9UPR3	Protein SMG5 (EST1-like protein B) (LPTS-RP1) (LPTS-interacting protein) (SMG-5 homolog) (hSMG-5)	FUNCTION: Plays a role in nonsense-mediated mRNA decay. Does not have RNase activity by itself. Promotes dephosphorylation of UPF1. Together with SMG7 is thought to provide a link to the mRNA degradation machinery involving exonucleolytic pathways, and to serve as an adapter for UPF1 to protein phosphatase 2A (PP2A), thereby triggering UPF1 dephosphorylation. Necessary for TERT activity. {ECO:000…	67	Q9UPR3	10	0	0	0	0	0	0	0	0	0	0	0	0	0	0	0	0	0	0	0	0	0	0	0	0	0	0	0	0	0	0	0
						AGO2	Q9UKV8	Protein argonaute-2 (Argonaute2) (hAgo2) (EC 3.1.26.n2) (Argonaute RISC catalytic component 2) (Eukaryotic translation initiation factor 2C 2) (eIF-2C 2) (eIF2C 2) (PAZ Piwi domain protein) (PPD) (Protein slicer)	FUNCTION: Required for RNA-mediated gene silencing (RNAi) by the RNA-induced silencing complex (RISC). The 'minimal RISC' appears to include AGO2 bound to a short guide RNA such as a microRNA (miRNA) or short interfering RNA (siRNA). These guide RNAs direct RISC to complementary mRNAs that are targets for RISC-mediated gene silencing. The precise mechanism of gene silencing depends on the degree …	68	Q9UKV8	17.75	0	0	0	0	0	0	0	0	0	0	0	0	0	0	0	0	0	0	0	0	0	0	0	0	0	0	0	0	0	0	0
						EDC4	Q6P2E9	Enhancer of mRNA-decapping protein 4 (Autoantigen Ge-1) (Autoantigen RCD-8) (Human enhancer of decapping large subunit) (Hedls)	FUNCTION: In the process of mRNA degradation, seems to play a role in mRNA decapping. Component of a complex containing DCP2 and DCP1A which functions in decapping of ARE-containing mRNAs. Promotes complex formation between DCP1A and DCP2. Enhances the catalytic activity of DCP2 (in vitro). {ECO:0000269|PubMed:16364915}.	69	Q6P2E9	15.5	0	0	0	0	0	0	0	0	0	0	0	0	0	0	0	0	0	0	0	0	0	0	0	0	0	0	0	0	0	0	0
						DCP1A	Q9NPI6	mRNA-decapping enzyme 1A (EC 3.-.-.-) (Smad4-interacting transcriptional co-activator) (Transcription factor SMIF)	FUNCTION: Necessary for the degradation of mRNAs, both in normal mRNA turnover and in nonsense-mediated mRNA decay. Removes the 7-methyl guanine cap structure from mRNA molecules, yielding a 5'-phosphorylated mRNA fragment and 7m-GDP. Contributes to the transactivation of target genes after stimulation by TGFB1. {ECO:0000269|PubMed:11836524, ECO:0000269|PubMed:12417715}.	70	Q9NPI6	14.5	0	0	0	0	0	0	0	0	0	0	0	0	0	0	0	0	0	0	0	0	0	0	0	0	0	0	0	0	0	0	0
						R3HD2	Q9Y2K5	R3H domain-containing protein 2		71	Q9Y2K5	4.25	0	0	0	0	0	0	0	0	0	0	0	0	0	0	0	0	0	0	0	0	0	0	0	0	0	0	0	0	0	0	0
						GGYF1	O75420	GRB10-interacting GYF protein 1 (PERQ amino acid-rich with GYF domain-containing protein 1)	FUNCTION: May act cooperatively with GRB10 to regulate tyrosine kinase receptor signaling. May increase IGF1 receptor phosphorylation under IGF1 stimulation as well as phosphorylation of IRS1 and SHC1 (By similarity). {ECO:0000250, ECO:0000269|PubMed:12771153}.	72	O75420	13.25	0	0	0	0	0	0	0	0	0	0	0	0	0	0	0	0	0	0	0	0	0	0	0	0	0	0	0	0	0	0	0
						RENT1	Q92900	Regulator of nonsense transcripts 1 (EC 3.6.4.-) (ATP-dependent helicase RENT1) (Nonsense mRNA reducing factor 1) (NORF1) (Up-frameshift suppressor 1 homolog) (hUpf1)	FUNCTION: RNA-dependent helicase and ATPase required for nonsense-mediated decay (NMD) of mRNAs containing premature stop codons. Is recruited to mRNAs upon translation termination and undergoes a cycle of phosphorylation and dephosphorylation; its phosphorylation appears to be a key step in NMD. Recruited by release factors to stalled ribosomes together with the SMG1C protein kinase complex to f…	73	Q92900	11.25	0	0	0	0	0	0	0	0	0	0	0	0	0	0	0	0	0	0	0	0	0	0	0	0	0	0	0	0	0	2	0
						LS14A	Q8ND56	Protein LSM14 homolog A (Protein FAM61A) (Protein SCD6 homolog) (Putative alpha-synuclein-binding protein) (AlphaSNBP) (RNA-associated protein 55A) (hRAP55) (hRAP55A)	FUNCTION: Essential for formation of P-bodies, cytoplasmic structures that provide storage sites for non-translating mRNAs. {ECO:0000269|PubMed:16484376, ECO:0000269|PubMed:17074753}.	74	Q8ND56	11.75	0	0	0	0	0	0	0	0	0	0	0	0	0	0	0	0	0	0	0	0	0	0	0	5.5	0	0	0	0	0	0	0
						MOV10	Q9HCE1	Putative helicase MOV-10 (EC 3.6.4.13) (Armitage homolog) (Moloney leukemia virus 10 protein)	FUNCTION: Probable RNA helicase. Required for miRNA-mediated gene silencing by the RNA-induced silencing complex (RISC). Required for both miRNA-mediated translational repression and miRNA-mediated cleavage of complementary mRNAs by RISC. {ECO:0000269|PubMed:16289642, ECO:0000269|PubMed:17507929, ECO:0000269|PubMed:22791714}.; FUNCTION: (Microbial infection) Required for RNA-directed transcriptio…	75	Q9HCE1	3.75	0	0	0	0	0	0	0	0	2	0	0	0	0	0	0	0	0	0	0	0	0	0	0	0	0	0	0	0	0	0	0
						FUBP3	Q96I24	Far upstream element-binding protein 3 (FUSE-binding protein 3)	FUNCTION: May interact with single-stranded DNA from the far-upstream element (FUSE). May activate gene expression.	76	Q96I24	37.25	0	0	0	9.5	11	0	0	0	0	0	0	6	0	0	0	8.25	0	0	0	9	0	0	0	0	0	0	0	0	0	0	0
						PRC2B	Q5JSZ5	Protein PRRC2B (HLA-B-associated transcript 2-like 1) (Proline-rich coiled-coil protein 2B)		77	Q5JSZ5	20.5	2.75	0	0	15.5	2.75	0	2.5	3	0	0	0	3.5	0	0	7	0	0	3	0	0	0	3	0	0	0	0	4	0	3.5	0	2.5
						IF2B1	Q9NZI8	Insulin-like growth factor 2 mRNA-binding protein 1 (IGF2 mRNA-binding protein 1) (IMP-1) (IMP1) (Coding region determinant-binding protein) (CRD-BP) (IGF-II mRNA-binding protein 1) (VICKZ family member 1) (Zipcode-binding protein 1) (ZBP-1)	FUNCTION: RNA-binding factor that recruits target transcripts to cytoplasmic protein-RNA complexes (mRNPs). This transcript 'caging' into mRNPs allows mRNA transport and transient storage. It also modulates the rate and location at which target transcripts encounter the translational apparatus and shields them from endonuclease attacks or microRNA-mediated degradation. Plays a direct role in the …	78	Q9NZI8	16	0	0	0	12	0	0	0	0	0	12.5	0	0	0	0	0	0	0	0	0	0	0	0	0	0	0	0	0	0	0	0	0
						IF2B3	O00425	Insulin-like growth factor 2 mRNA-binding protein 3 (IGF2 mRNA-binding protein 3) (IMP-3) (IGF-II mRNA-binding protein 3) (KH domain-containing protein overexpressed in cancer) (hKOC) (VICKZ family member 3)	FUNCTION: RNA-binding factor that may recruit target transcripts to cytoplasmic protein-RNA complexes (mRNPs). This transcript 'caging' into mRNPs allows mRNA transport and transient storage. It also modulates the rate and location at which target transcripts encounter the translational apparatus and shields them from endonuclease attacks or microRNA-mediated degradation. Binds to the 3'-UTR of C…	79	O00425	7.75	0	0	0	5.5	0	0	0	0	6	5	0	0	0	0	0	0	0	0	0	0	6	0	0	0	0	0	0	6.5	0	0	0
						HSP76	P17066	Heat shock 70 kDa protein 6 (Heat shock 70 kDa protein B')	FUNCTION: Molecular chaperone implicated in a wide variety of cellular processes, including protection of the proteome from stress, folding and transport of newly synthesized polypeptides, activation of proteolysis of misfolded proteins and the formation and dissociation of protein complexes. Plays a pivotal role in the protein quality control system, ensuring the correct folding of proteins, the…	80	P17066	57.25	0	0	0	0	0	0	0	0	0	0	54.25	0	0	0	0	0	0	0	0	0	0	0	0	0	0	0	0	0	0	0	0
						HSP74	P34932	Heat shock 70 kDa protein 4 (HSP70RY) (Heat shock 70-related protein APG-2)		81	P34932	20	0	0	0	0	0	0	0	0	0	0	26.5	0	0	0	0	0	21	0	0	0	0	0	0	0	0	0	0	0	0	0	0
						OFD1	O75665	Oral-facial-digital syndrome 1 protein (Protein 71-7A)	FUNCTION: Component of the centrioles controlling mother and daughter centrioles length. Recruits to the centriole IFT88 and centriole distal appendage-specific proteins including CEP164. Involved in the biogenesis of the cilium, a centriole-associated function. The cilium is a cell surface projection found in many vertebrate cells required to transduce signals important for development and tissu…	82	O75665	6	0	6.75	0	0	0	0	0	0	0	0	0	0	0	0	0	0	0	0	0	0	0	0	2	0	0	9.5	0	0	0	0	0

## Sheet: C2
Baits in cluster 2						Preys in cluster 2							PSM average per bait
Uniprot	Bait	Frequency	PSM sum in cluster	% of PSMs		Name	Uniprot	Protein names	Function (Uniprot)	Uniprot	Actin and myosin linked protein	ATP protein		FOS	STAT1	FOXL1	MYC	FOXQ1	GLI2	ETV4	SMAD5	NFYC	ETV6	LHX4	STAT3	ESR1	MYOD1	NFKB1	PPARG	EN1	NFATC4	LHX8	KLF5	STAT4	GATA1	GATA2	KLF12	TAL1	TEAD1	E2F1	KLF6	LHX6	MYB	ELK3	ETV3
P01100	FOS	54	2127.75	54.7583		MYO1C	O00159	Unconventional myosin-Ic (Myosin I beta) (MMI-beta) (MMIb)	FUNCTION: Myosins are actin-based motor molecules with ATPase activity. Unconventional myosins serve in intracellular movements. Their highly divergent tails are presumed to bind to membranous compartments, which would be moved relative to actin filaments. Involved in glucose transporter recycling in response to insulin by regulating movement of intracellular GLUT4-containing vesicles to the plas…	O00159	x	x	O00159	23.5	3.75	0	0	0	0	0	0	0	0	0	0	0	0	0	0	0	0	0	0	0	0	0	0	0	0	0	0	0	0	0	0
P42224	STAT1	18	426.75	10.9825		PGRC1	O00264	Membrane-associated progesterone receptor component 1 (mPR) (Dap1) (IZA)	FUNCTION: Component of a progesterone-binding protein complex (PubMed:28396637). Binds progesterone (PubMed:25675345). Has many reported cellular functions (heme homeostasis, interaction with CYPs). {ECO:0000269|PubMed:25675345, ECO:0000303|PubMed:28396637}.	O00264			O00264	3.25	0	3.25	0	0	0	0	0	0	0	0	0	0	0	0	0	0	0	0	0	0	0	0	0	0	0	0	0	0	0	0	0
Q12952	FOXL1	17	207.75	5.34651		ACACB	O00763	Acetyl-CoA carboxylase 2 (EC 6.4.1.2) (ACC-beta) [Includes: Biotin carboxylase (EC 6.3.4.14)]	FUNCTION: Catalyzes the ATP-dependent carboxylation of acetyl-CoA to malonyl-CoA. Carries out three functions: biotin carboxyl carrier protein, biotin carboxylase and carboxyltransferase. Involved in inhibition of fatty acid and glucose oxidation and enhancement of fat storage (By similarity). May play a role in regulation of mitochondrial fatty acid oxidation through malonyl-CoA-dependent inhibi…	O00763		x	O00763	84.75	0	57.75	64.25	34.75	69.75	32	58.62	40.75	35	39.5	0	51.25	35.75	0	35	0	0	55	32.5	33	0	46.25	38	0	0	51.25	37	34	33.5	0	0
P01106	MYC	11	158.25	4.07261		ARPC3	O15145	Actin-related protein 2/3 complex subunit 3 (Arp2/3 complex 21 kDa subunit) (p21-ARC)	FUNCTION: Component of the Arp2/3 complex, a multiprotein complex that mediates actin polymerization upon stimulation by nucleation-promoting factor (NPF) (PubMed:9230079). The Arp2/3 complex mediates the formation of branched actin networks in the cytoplasm, providing the force for cell motility (PubMed:9230079). In addition to its role in the cytoplasmic cytoskeleton, the Arp2/3 complex also pr…	O15145	x		O15145	2.25	0	0	0	0	0	0	0	0	0	0	0	0	0	0	0	0	0	0	0	0	0	0	0	0	0	0	0	0	0	0	0
Q9C009	FOXQ1	5	52.25	1.34467		ACTN4	O43707	Alpha-actinin-4 (Non-muscle alpha-actinin 4)	FUNCTION: F-actin cross-linking protein which is thought to anchor actin to a variety of intracellular structures. This is a bundling protein (Probable). Probably involved in vesicular trafficking via its association with the CART complex. The CART complex is necessary for efficient transferrin receptor recycling but not for EGFR degradation (PubMed:15772161). Involved in tight junction assembly …	O43707	x		O43707	12.5	5.5	0	0	0	0	0	0	0	0	0	0	0	0	0	0	0	0	0	0	0	0	0	0	0	0	0	0	0	0	0	0
P10070	GLI2	4	97.25	2.50276		MYO1B	O43795	Unconventional myosin-Ib (MYH-1c) (Myosin I alpha) (MMI-alpha) (MMIa)	FUNCTION: Motor protein that may participate in process critical to neuronal development and function such as cell migration, neurite outgrowth and vesicular transport. {ECO:0000250}.	O43795	x		O43795	42	12.75	7.75	0	0	0	0	0	0	0	0	0	0	0	0	0	0	0	0	0	0	0	0	0	0	0	0	0	0	0	0	0
P43268	ETV4	4	41.5	1.06802		WDR1	O75083	WD repeat-containing protein 1 (Actin-interacting protein 1) (AIP1) (NORI-1)	FUNCTION: Induces disassembly of actin filaments in conjunction with ADF/cofilin family proteins (PubMed:15629458). Enhances cofilin-mediated actin severing (By similarity). Involved in cytokinesis. Involved in chemotactic cell migration by restricting lamellipodial membrane protrusions (PubMed:18494608). Involved in myocardium sarcomere organization. Required for cardiomyocyte growth and mainten…	O75083	x		O75083	6.25	5	0	0	0	0	0	0	0	0	0	0	0	0	0	0	0	0	0	0	0	0	0	0	0	0	0	0	0	0	0	0
Q99717	SMAD5	4	74.38	1.91419		MYO1D	O94832	Unconventional myosin-Id	FUNCTION: Myosins are actin-based motor molecules with ATPase activity. Unconventional myosins serve in intracellular movements. Their highly divergent tails are presumed to bind to membranous compartments, which would be moved relative to actin filaments (By similarity). {ECO:0000250}.	O94832	x		O94832	40	14.25	0	0	0	0	0	0	0	0	0	0	0	0	0	0	0	0	0	0	0	0	0	0	0	0	0	0	0	0	0	0
Q13952	NFYC	3	50	1.28677		SVIL	O95425	Supervillin (Archvillin) (p205/p250)	FUNCTION: Isoform 1: Forms a high-affinity link between the actin cytoskeleton and the membrane. Is among the first costameric proteins to assemble during myogenesis and it contributes to myogenic membrane structure and differentiation (PubMed:12711699). Appears to be involved in myosin II assembly. May modulate myosin II regulation through MLCK during cell spreading, an initial step in cell migr…	O95425	x		O95425	7.75	0	0	0	0	0	0	0	0	0	0	0	0	0	0	0	0	0	0	0	0	0	0	0	0	0	0	0	0	0	0	0
P03372	ESR1	2	55.75	1.43474		FOS	P01100	Proto-oncogene c-Fos (Cellular oncogene fos) (G0/G1 switch regulatory protein 7)	FUNCTION: Nuclear phosphoprotein which forms a tight but non-covalently linked complex with the JUN/AP-1 transcription factor. In the heterodimer, FOS and JUN/AP-1 basic regions each seems to interact with symmetrical DNA half sites. On TGF-beta activation, forms a multimeric SMAD3/SMAD4/JUN/FOS complex at the AP1/SMAD-binding site to regulate TGF-beta-mediated signaling. Has a critical function …	P01100			P01100	17.75	0	0	0	0	0	0	0	0	0	0	0	0	0	0	0	0	0	0	0	0	0	0	0	0	0	0	0	0	0	0	0
P15172	MYOD1	2	42.75	1.10019		AT1A1	P05023	Sodium/potassium-transporting ATPase subunit alpha-1 (Na(+)/K(+) ATPase alpha-1 subunit) (EC 3.6.3.9) (Sodium pump subunit alpha-1)	FUNCTION: This is the catalytic component of the active enzyme, which catalyzes the hydrolysis of ATP coupled with the exchange of sodium and potassium ions across the plasma membrane. This action creates the electrochemical gradient of sodium and potassium ions, providing the energy for active transport of various nutrients.	P05023		x	P05023	4	0	4.5	4.75	2.5	0	0	0	0	0	0	3	0	0	0	0	0	0	0	0	0	0	0	0	0	0	0	0	0	0	0	0
P19838	NFKB1	2	10.5	0.270221		ADT2	P05141	ADP/ATP translocase 2 (ADP,ATP carrier protein 2) (ADP,ATP carrier protein, fibroblast isoform) (Adenine nucleotide translocator 2) (ANT 2) (Solute carrier family 25 member 5) [Cleaved into: ADP/ATP translocase 2, N-terminally processed]	FUNCTION: Catalyzes the exchange of cytoplasmic ADP with mitochondrial ATP across the mitochondrial inner membrane. As part of the mitotic spindle-associated MMXD complex it may play a role in chromosome segregation. {ECO:0000269|PubMed:20797633}.	P05141		x	P05141	3.5	0	4.25	5	4.25	0	3	2.5	0	0	2	7.33	0	0	0	2.75	0	6	0	0	0	0	0	0	0	0	0	0	0	0	3.5	3.5
P37231	PPARG	2	37.75	0.971508		JUN	P05412	Transcription factor AP-1 (Activator protein 1) (AP1) (Proto-oncogene c-Jun) (V-jun avian sarcoma virus 17 oncogene homolog) (p39)	FUNCTION: Transcription factor that recognizes and binds to the enhancer heptamer motif 5'-TGA[CG]TCA-3'. Promotes activity of NR5A1 when phosphorylated by HIPK3 leading to increased steroidogenic gene expression upon cAMP signaling pathway stimulation. Involved in activated KRAS-mediated transcriptional activation of USP28 in colorectal cancer (CRC) cells (PubMed:24623306). Binds to the USP28 pr…	P05412			P05412	7.25	0	0	0	0	0	0	0	0	0	0	0	0	0	0	0	0	0	0	0	0	0	0	0	0	2.25	0	0	0	0	0	0
P40763	STAT3	2	10.33	0.265846		ATPB	P06576	ATP synthase subunit beta, mitochondrial (EC 3.6.3.14) (ATP synthase F1 subunit beta)	FUNCTION: Mitochondrial membrane ATP synthase (F(1)F(0) ATP synthase or Complex V) produces ATP from ADP in the presence of a proton gradient across the membrane which is generated by electron transport complexes of the respiratory chain. F-type ATPases consist of two structural domains, F(1) - containing the extramembraneous catalytic core, and F(0) - containing the membrane proton channel, link…	P06576		x	P06576	15	0	12.25	19	0	0	0	0	0	0	0	0	0	0	0	0	0	0	0	0	0	0	0	0	0	0	0	0	0	0	0	0
P41212	ETV6	2	38	0.977942		TPM3	P06753	Tropomyosin alpha-3 chain (Gamma-tropomyosin) (Tropomyosin-3) (Tropomyosin-5) (hTM5)	FUNCTION: Binds to actin filaments in muscle and non-muscle cells. Plays a central role, in association with the troponin complex, in the calcium dependent regulation of vertebrate striated muscle contraction. Smooth muscle contraction is regulated by interaction with caldesmon. In non-muscle cells is implicated in stabilizing cytoskeleton actin filaments. {ECO:0000250|UniProtKB:P09493}.	P06753	x		P06753	22	0	0	0	0	0	0	0	0	0	0	0	0	0	0	0	0	0	0	0	0	0	0	0	0	0	0	0	0	0	0	0
Q05925	EN1	2	10	0.257353		TPM1	P09493	Tropomyosin alpha-1 chain (Alpha-tropomyosin) (Tropomyosin-1)	FUNCTION: Binds to actin filaments in muscle and non-muscle cells (PubMed:23170982). Plays a central role, in association with the troponin complex, in the calcium dependent regulation of vertebrate striated muscle contraction (PubMed:23170982). Smooth muscle contraction is regulated by interaction with caldesmon. In non-muscle cells is implicated in stabilizing cytoskeleton actin filaments.	P09493	x		P09493	19.75	11.25	9.5	0	0	0	0	0	0	0	0	0	0	0	0	0	0	0	0	0	0	0	0	0	0	0	0	0	0	0	0	0
Q14934	NFATC4	2	9.5	0.244486		CALM2	P0DP24	Calmodulin-2	FUNCTION: Calmodulin mediates the control of a large number of enzymes, ion channels, aquaporins and other proteins through calcium-binding. Among the enzymes to be stimulated by the calmodulin-calcium complex are a number of protein kinases and phosphatases. Together with CCP110 and centrin, is involved in a genetic pathway that regulates the centrosome cycle and progression through cytokinesis …	P0DP24	x		P0DP24	14	0	12	0	0	0	0	0	0	0	0	0	0	0	0	0	0	0	0	0	0	0	0	0	0	0	0	0	0	0	0	0
Q68G74	LHX8	2	60.75	1.56342		KCRB	P12277	Creatine kinase B-type (EC 2.7.3.2) (Brain creatine kinase) (B-CK) (Creatine kinase B chain) (Creatine phosphokinase B-type) (CPK-B)	FUNCTION: Reversibly catalyzes the transfer of phosphate between ATP and various phosphogens (e.g. creatine phosphate). Creatine kinase isoenzymes play a central role in energy transduction in tissues with large, fluctuating energy demands, such as skeletal muscle, heart, brain and spermatozoa.	P12277		x	P12277	5.75	4.75	0	0	0	0	0	0	0	0	0	0	0	0	0	0	0	0	0	0	0	0	0	0	0	0	0	0	0	0	0	0
Q969G2	LHX4	2	41.5	1.06802		ENPL	P14625	Endoplasmin (94 kDa glucose-regulated protein) (GRP-94) (Heat shock protein 90 kDa beta member 1) (Tumor rejection antigen 1) (gp96 homolog)	FUNCTION: Molecular chaperone that functions in the processing and transport of secreted proteins. When associated with CNPY3, required for proper folding of Toll-like receptors (By similarity). Functions in endoplasmic reticulum associated degradation (ERAD). Has ATPase activity. {ECO:0000250, ECO:0000269|PubMed:18264092}.	P14625		x	P14625	14.5	0	12.5	12.25	0	0	0	0	0	0	0	0	0	0	0	0	0	0	0	0	0	13.25	0	0	0	0	0	0	0	0	0	0
P10242	MYB	1	33.5	0.862133		MYL6B	P14649	Myosin light chain 6B (Myosin light chain 1 slow-twitch muscle A isoform) (MLC1sa) (Smooth muscle and nonmuscle myosin light chain alkali 6B)	FUNCTION: Regulatory light chain of myosin. Does not bind calcium.	P14649	x		P14649	15.5	5	0	0	0	0	0	0	0	0	0	0	0	0	0	0	0	0	0	0	0	0	0	0	0	0	0	0	0	0	0	0
P15976	GATA1	1	13.25	0.340993		JUND	P17535	Transcription factor jun-D	FUNCTION: Transcription factor binding AP-1 sites. {ECO:0000269|PubMed:9989505}.	P17535			P17535	5.75	0	0	0	0	0	0	0	0	0	0	0	0	0	0	0	0	0	0	0	0	0	0	0	0	0	0	0	0	0	0	0
P17542	TAL1	1	5	0.128677		ML12A	P19105	Myosin regulatory light chain 12A (Epididymis secretory protein Li 24) (HEL-S-24) (MLC-2B) (Myosin RLC) (Myosin regulatory light chain 2, nonsarcomeric) (Myosin regulatory light chain MRLC3)	FUNCTION: Myosin regulatory subunit that plays an important role in regulation of both smooth muscle and nonmuscle cell contractile activity via its phosphorylation. Implicated in cytokinesis, receptor capping, and cell locomotion (By similarity). {ECO:0000250}.	P19105	x		P19105	27.75	0	0	0	0	0	0	0	0	0	0	0	0	0	0	0	0	0	0	0	0	0	0	0	0	0	0	0	0	0	0	0
P23769	GATA2	1	46.25	1.19026		COF1	P23528	Cofilin-1 (18 kDa phosphoprotein) (p18) (Cofilin, non-muscle isoform)	FUNCTION: Binds to F-actin and exhibits pH-sensitive F-actin depolymerizing activity. Regulates actin cytoskeleton dynamics. Important for normal progress through mitosis and normal cytokinesis. Plays a role in the regulation of cell morphology and cytoskeletal organization. Required for the up-regulation of atypical chemokine receptor ACKR2 from endosomal compartment to cell membrane, increasing…	P23528	x		P23528	8.5	5.75	0	0	0	0	0	0	0	0	0	0	0	0	0	0	0	0	0	0	0	0	0	0	0	0	0	0	0	0	0	0
P28347	TEAD1	1	2.25	0.0579045		ATPA	P25705	ATP synthase subunit alpha, mitochondrial (ATP synthase F1 subunit alpha)	FUNCTION: Mitochondrial membrane ATP synthase (F(1)F(0) ATP synthase or Complex V) produces ATP from ADP in the presence of a proton gradient across the membrane which is generated by electron transport complexes of the respiratory chain. F-type ATPases consist of two structural domains, F(1) - containing the extramembraneous catalytic core, and F(0) - containing the membrane proton channel, link…	P25705		x	P25705	10	0	8.75	11.75	0	0	0	0	0	0	0	0	0	0	0	0	0	0	0	0	0	0	0	0	0	0	0	0	0	0	0	0
P41162	ETV3	1	3.5	0.0900736		CALX	P27824	Calnexin (IP90) (Major histocompatibility complex class I antigen-binding protein p88) (p90)	FUNCTION: Calcium-binding protein that interacts with newly synthesized glycoproteins in the endoplasmic reticulum. It may act in assisting protein assembly and/or in the retention within the ER of unassembled protein subunits. It seems to play a major role in the quality control apparatus of the ER by the retention of incorrectly folded proteins. Associated with partial T-cell antigen receptor c…	P27824			P27824	10	0	8	7.75	0	0	0	0	0	0	0	0	0	0	5.5	0	5.25	0	0	0	0	0	0	0	0	0	0	0	0	0	0	0
P41970	ELK3	1	3.5	0.0900736		2AAA	P30153	Serine/threonine-protein phosphatase 2A 65 kDa regulatory subunit A alpha isoform (Medium tumor antigen-associated 61 kDa protein) (PP2A subunit A isoform PR65-alpha) (PP2A subunit A isoform R1-alpha)	FUNCTION: The PR65 subunit of protein phosphatase 2A serves as a scaffolding molecule to coordinate the assembly of the catalytic subunit and a variable regulatory B subunit. Upon interaction with GNA12 promotes dephosphorylation of microtubule associated protein TAU/MAPT (PubMed:15525651). Required for proper chromosome segregation and for centromeric localization of SGO1 in mitosis (PubMed:1658…	P30153			P30153	7.75	0	0	0	0	12.5	0	0	0	0	0	0	0	0	0	0	0	0	0	0	0	0	0	0	0	0	0	0	0	0	0	0
Q01094	E2F1	1	51.25	1.31894		PHB	P35232	Prohibitin	FUNCTION: Prohibitin inhibits DNA synthesis. It has a role in regulating proliferation. As yet it is unclear if the protein or the mRNA exhibits this effect. May play a role in regulating mitochondrial respiration activity and in aging. {ECO:0000269|PubMed:11302691}.	P35232		x	P35232	8.25	0	9.25	10.25	4.75	0	3.5	6.88	4	0	0	0	0	0	0	0	4.75	3.5	5.75	0	0	0	0	0	0	0	0	0	0	0	0	0
Q13887	KLF5	1	32.5	0.836398		MYH9	P35579	Myosin-9 (Cellular myosin heavy chain, type A) (Myosin heavy chain 9) (Myosin heavy chain, non-muscle IIa) (Non-muscle myosin heavy chain A) (NMMHC-A) (Non-muscle myosin heavy chain IIa) (NMMHC II-a) (NMMHC-IIA)	FUNCTION: Cellular myosin that appears to play a role in cytokinesis, cell shape, and specialized functions such as secretion and capping. During cell spreading, plays an important role in cytoskeleton reorganization, focal contacts formation (in the margins but not the central part of spreading cells), and lamellipodial retraction; this function is mechanically antagonized by MYH10. {ECO:0000269…	P35579	x		P35579	414.25	0	0	0	0	0	0	0	0	0	0	0	0	0	0	0	0	0	0	0	0	0	0	0	0	0	0	0	0	0	0	0
Q14765	STAT4	1	33	0.849266		MYH10	P35580	Myosin-10 (Cellular myosin heavy chain, type B) (Myosin heavy chain 10) (Myosin heavy chain, non-muscle IIb) (Non-muscle myosin heavy chain B) (NMMHC-B) (Non-muscle myosin heavy chain IIb) (NMMHC II-b) (NMMHC-IIB)	FUNCTION: Cellular myosin that appears to play a role in cytokinesis, cell shape, and specialized functions such as secretion and capping. Involved with LARP6 in the stabilization of type I collagen mRNAs for CO1A1 and CO1A2. During cell spreading, plays an important role in cytoskeleton reorganization, focal contacts formation (in the central part but not the margins of spreading cells), and lam…	P35580	x		P35580	295.5	0	0	0	0	0	0	0	0	0	0	0	0	0	0	0	0	0	0	0	0	0	0	0	0	0	0	0	0	0	0	0
Q99612	KLF6	1	37	0.952207		MYL6	P60660	Myosin light polypeptide 6 (17 kDa myosin light chain) (LC17) (Myosin light chain 3) (MLC-3) (Myosin light chain alkali 3) (Myosin light chain A3) (Smooth muscle and nonmuscle myosin light chain alkali 6)	FUNCTION: Regulatory light chain of myosin. Does not bind calcium.	P60660	x		P60660	33.5	0	0	0	0	0	0	0	0	0	0	0	0	0	0	0	0	0	0	0	0	0	0	0	0	0	0	0	0	0	0	0
Q9UPM6	LHX6	1	34	0.875001		ACTB	P60709	Actin, cytoplasmic 1 (Beta-actin) [Cleaved into: Actin, cytoplasmic 1, N-terminally processed]	FUNCTION: Actin is a highly conserved protein that polymerizes to produce filaments that form cross-linked networks in the cytoplasm of cells (PubMed:29581253). Actin exists in both monomeric (G-actin) and polymeric (F-actin) forms, both forms playing key functions, such as cell motility and contraction (PubMed:29581253). In addition to their role in the cytoplasmic cytoskeleton, G- and F-actin a…	P60709	x		P60709	378.25	221.5	0	0	0	0	0	0	0	0	0	0	0	0	0	0	0	0	0	0	0	0	0	0	0	0	0	0	0	0	0	0
Q9Y4X4	KLF12	1	38	0.977942		RAB8A	P61006	Ras-related protein Rab-8A (Oncogene c-mel)	FUNCTION: The small GTPases Rab are key regulators of intracellular membrane trafficking, from the formation of transport vesicles to their fusion with membranes. Rabs cycle between an inactive GDP-bound form and an active GTP-bound form that is able to recruit to membranes different sets of downstream effectors directly responsible for vesicle formation, movement, tethering and fusion. That Rab …	P61006	x		P61006	2.5	0	0	0	0	0	0	0	0	0	0	0	0	0	0	0	0	0	0	0	0	0	0	0	0	0	0	0	0	0	0	0
						ARP3	P61158	Actin-related protein 3 (Actin-like protein 3)	FUNCTION: ATP-binding component of the Arp2/3 complex, a multiprotein complex that mediates actin polymerization upon stimulation by nucleation-promoting factor (NPF) (PubMed:9000076). The Arp2/3 complex mediates the formation of branched actin networks in the cytoplasm, providing the force for cell motility (PubMed:9000076). Seems to contact the pointed end of the daughter actin filament (PubMed…	P61158	x		P61158	5	3	0	0	0	0	0	0	0	0	0	0	0	0	0	0	0	0	0	0	0	0	0	0	0	0	0	0	0	0	0	0
						2ABA	P63151	Serine/threonine-protein phosphatase 2A 55 kDa regulatory subunit B alpha isoform (PP2A subunit B isoform B55-alpha) (PP2A subunit B isoform PR55-alpha) (PP2A subunit B isoform R2-alpha) (PP2A subunit B isoform alpha)	FUNCTION: The B regulatory subunit might modulate substrate selectivity and catalytic activity, and also might direct the localization of the catalytic enzyme to a particular subcellular compartment.	P63151			P63151	6.5	0	0	0	0	9	0	0	0	0	0	0	0	0	0	0	0	0	0	0	0	0	0	0	0	0	0	0	0	0	0	0
						TPM4	P67936	Tropomyosin alpha-4 chain (TM30p1) (Tropomyosin-4)	FUNCTION: Binds to actin filaments in muscle and non-muscle cells. Plays a central role, in association with the troponin complex, in the calcium dependent regulation of vertebrate striated muscle contraction. Smooth muscle contraction is regulated by interaction with caldesmon. In non-muscle cells is implicated in stabilizing cytoskeleton actin filaments (By similarity). Binds calcium (PubMed:18…	P67936	x		P67936	20.25	0	0	0	0	0	0	0	0	0	0	0	0	0	0	0	0	0	0	0	0	0	0	0	0	0	0	0	0	0	0	0
						ACTC	P68032	Actin, alpha cardiac muscle 1 (Alpha-cardiac actin) [Cleaved into: Actin, alpha cardiac muscle 1, intermediate form]	FUNCTION: Actins are highly conserved proteins that are involved in various types of cell motility and are ubiquitously expressed in all eukaryotic cells.	P68032	x		P68032	130.5	0	0	0	0	0	0	0	0	0	0	0	0	0	0	0	0	0	0	0	0	0	0	0	0	0	0	0	0	0	0	0
						SPTB2	Q01082	Spectrin beta chain, non-erythrocytic 1 (Beta-II spectrin) (Fodrin beta chain) (Spectrin, non-erythroid beta chain 1)	FUNCTION: Fodrin, which seems to be involved in secretion, interacts with calmodulin in a calcium-dependent manner and is thus candidate for the calcium-dependent movement of the cytoskeleton at the membrane.	Q01082	x		Q01082	14.5	0	0	0	0	0	0	0	0	0	0	0	0	0	0	0	0	0	0	0	0	0	0	0	0	0	0	0	0	0	0	0
						SPTN1	Q13813	Spectrin alpha chain, non-erythrocytic 1 (Alpha-II spectrin) (Fodrin alpha chain) (Spectrin, non-erythroid alpha subunit)	FUNCTION: Fodrin, which seems to be involved in secretion, interacts with calmodulin in a calcium-dependent manner and is thus candidate for the calcium-dependent movement of the cytoskeleton at the membrane.	Q13813	x		Q13813	23.25	9.75	0	0	0	0	0	0	0	0	0	0	0	0	0	0	0	0	0	0	0	0	0	0	0	0	0	0	0	0	0	0
						DREB	Q16643	Drebrin (Developmentally-regulated brain protein)	FUNCTION: Drebrins might play some role in cell migration, extension of neuronal processes and plasticity of dendrites. Required for actin polymerization at immunological synapses (IS) and for CXCR4 recruitment to IS. {ECO:0000269|PubMed:20215400}.	Q16643	x		Q16643	29	18	8.25	0	0	0	0	0	0	0	0	0	0	0	0	0	0	0	0	0	0	0	0	0	0	0	0	0	0	0	0	0
						TIM50	Q3ZCQ8	Mitochondrial import inner membrane translocase subunit TIM50	FUNCTION: Essential component of the TIM23 complex, a complex that mediates the translocation of transit peptide-containing proteins across the mitochondrial inner membrane. Has some phosphatase activity in vitro; however such activity may not be relevant in vivo. {ECO:0000269|PubMed:15044455}.; FUNCTION: Isoform 2: May participate in the release of snRNPs and SMN from the Cajal body. {ECO:000026…	Q3ZCQ8		x	Q3ZCQ8	3	0	0	3.75	0	0	0	0	0	0	0	0	0	0	0	0	0	0	0	0	0	0	0	0	0	0	0	0	0	0	0	0
						ACTBL	Q562R1	Beta-actin-like protein 2 (Kappa-actin)	FUNCTION: Actins are highly conserved proteins that are involved in various types of cell motility and are ubiquitously expressed in all eukaryotic cells. {ECO:0000250}.	Q562R1	x		Q562R1	78.75	27.25	0	0	0	0	0	0	0	0	0	0	0	0	0	0	0	0	0	0	0	0	0	0	0	0	0	0	0	0	0	0
						MPRIP	Q6WCQ1	Myosin phosphatase Rho-interacting protein (M-RIP) (Rho-interacting protein 3) (RIP3) (p116Rip)	FUNCTION: Targets myosin phosphatase to the actin cytoskeleton. Required for the regulation of the actin cytoskeleton by RhoA and ROCK1. Depletion leads to an increased number of stress fibers in smooth muscle cells through stabilization of actin fibers by phosphorylated myosin. Overexpression of MRIP as well as its F-actin-binding region leads to disassembly of stress fibers in neuronal cells. {…	Q6WCQ1	x		Q6WCQ1	19.75	0	0	0	0	0	0	0	0	0	0	0	0	0	0	0	0	0	0	0	0	0	0	0	0	0	0	0	0	0	0	0
						MYH14	Q7Z406	Myosin-14 (Myosin heavy chain 14) (Myosin heavy chain, non-muscle IIc) (Non-muscle myosin heavy chain IIc) (NMHC II-C)	FUNCTION: Cellular myosin that appears to play a role in cytokinesis, cell shape, and specialized functions such as secretion and capping. {ECO:0000250}.	Q7Z406	x		Q7Z406	77	31.75	28.75	0	0	0	0	0	0	0	0	0	0	0	0	0	0	0	0	0	0	0	0	0	0	0	0	0	0	0	0	0
						MY18A	Q92614	Unconventional myosin-XVIIIa (Molecule associated with JAK3 N-terminus) (MAJN) (Myosin containing a PDZ domain) (Surfactant protein receptor SP-R210) (SP-R210)	FUNCTION: May link Golgi membranes to the cytoskeleton and participate in the tensile force required for vesicle budding from the Golgi. Thereby, may play a role in Golgi membrane trafficking and could indirectly give its flattened shape to the Golgi apparatus (PubMed:19837035, PubMed:23345592). Alternatively, in concert with LURAP1 and CDC42BPA/CDC42BPB, has been involved in modulating lamellar …	Q92614	x		Q92614	11.75	0	0	0	0	0	0	0	0	0	0	0	0	0	0	0	0	0	0	0	0	0	0	0	0	0	0	0	0	0	0	0
						PHB2	Q99623	Prohibitin-2 (B-cell receptor-associated protein BAP37) (D-prohibitin) (Repressor of estrogen receptor activity)	FUNCTION: Acts as a mediator of transcriptional repression by nuclear hormone receptors via recruitment of histone deacetylases (By similarity). Functions as an estrogen receptor (ER)-selective coregulator that potentiates the inhibitory activities of antiestrogens and represses the activity of estrogens. Competes with NCOA1 for modulation of ER transcriptional activity. Probably involved in regu…	Q99623		x	Q99623	8.25	0	8.25	11.25	6	0	0	6.38	0	0	0	0	0	0	5	0	0	0	0	0	0	0	0	0	5	0	0	0	0	0	0	0
						M1IP1	Q9NPA3	Mid1-interacting protein 1 (Gastrulation-specific G12-like protein) (Mid1-interacting G12-like protein) (Protein STRAIT11499) (Spot 14-related protein) (S14R) (Spot 14-R)	FUNCTION: Plays a role in the regulation of lipogenesis in liver. Up-regulates ACACA enzyme activity. Required for efficient lipid biosynthesis, including triacylglycerol, diacylglycerol and phospholipid. Involved in stabilization of microtubules (By similarity). {ECO:0000250}.	Q9NPA3			Q9NPA3	4.25	0	4.75	8.25	0	6	3	0	5.25	3	0	0	4.5	7	0	0	0	0	0	0	0	0	0	0	0	0	0	0	0	0	0	0
						MYO5C	Q9NQX4	Unconventional myosin-Vc	FUNCTION: May be involved in transferrin trafficking. Likely to power actin-based membrane trafficking in many physiologically crucial tissues.	Q9NQX4	x		Q9NQX4	4	0	0	0	0	0	0	0	0	0	0	0	0	0	0	0	0	0	0	0	0	0	0	0	0	0	0	0	0	0	0	0
						TMOD3	Q9NYL9	Tropomodulin-3 (Ubiquitous tropomodulin) (U-Tmod)	FUNCTION: Blocks the elongation and depolymerization of the actin filaments at the pointed end. The Tmod/TM complex contributes to the formation of the short actin protofilament, which in turn defines the geometry of the membrane skeleton (By similarity). {ECO:0000250}.	Q9NYL9	x		Q9NYL9	18	9.75	0	0	0	0	0	0	0	0	0	0	0	0	0	0	0	0	0	0	0	0	0	0	0	0	0	0	0	0	0	0
						TMOD2	Q9NZR1	Tropomodulin-2 (Neuronal tropomodulin) (N-Tmod)	FUNCTION: Blocks the elongation and depolymerization of the actin filaments at the pointed end. The Tmod/TM complex contributes to the formation of the short actin protofilament, which in turn defines the geometry of the membrane skeleton (By similarity). {ECO:0000250}.	Q9NZR1	x		Q9NZR1	2.75	0	0	0	0	0	0	0	0	0	0	0	0	0	0	0	0	0	0	0	0	0	0	0	0	0	0	0	0	0	0	0
						RAI14	Q9P0K7	Ankycorbin (Ankyrin repeat and coiled-coil structure-containing protein) (Novel retinal pigment epithelial cell protein) (Retinoic acid-induced protein 14)	FUNCTION: Plays a role in actin regulation at the ectoplasmic specialization, a type of cell junction specific to testis. Important for establishment of sperm polarity and normal spermatid adhesion. May also promote integrity of Sertoli cell tight junctions at the blood-testis barrier. {ECO:0000250|UniProtKB:Q5U312}.	Q9P0K7	x		Q9P0K7	17	0	0	0	0	0	0	0	0	0	0	0	0	0	0	0	0	0	0	0	0	0	0	0	0	0	0	0	0	0	0	0
						LIMA1	Q9UHB6	LIM domain and actin-binding protein 1 (Epithelial protein lost in neoplasm)	FUNCTION: Actin-binding protein involved in actin cytoskeleton regulation and dynamics. Increases the number and size of actin stress fibers and inhibits membrane ruffling. Inhibits actin filament depolymerization. Bundles actin filaments, delays filament nucleation and reduces formation of branched filaments (PubMed:12566430). Plays a role in cholesterol homeostasis. Influences plasma cholestero…	Q9UHB6	x		Q9UHB6	38.5	18	0	0	0	0	0	0	0	0	0	0	0	0	0	0	0	0	0	0	0	0	0	0	0	0	0	0	0	0	0	0
						MYO6	Q9UM54	Unconventional myosin-VI (Unconventional myosin-6)	FUNCTION: Myosins are actin-based motor molecules with ATPase activity. Unconventional myosins serve in intracellular movements. Myosin 6 is a reverse-direction motor protein that moves towards the minus-end of actin filaments. Has slow rate of actin-activated ADP release due to weak ATP binding. Functions in a variety of intracellular processes such as vesicular membrane trafficking and cell mig…	Q9UM54	x		Q9UM54	49	23.5	11.25	0	0	0	0	0	0	0	0	0	0	0	0	0	0	0	0	0	0	0	0	0	0	0	0	0	0	0	0	0
						COF2	Q9Y281	Cofilin-2 (Cofilin, muscle isoform)	FUNCTION: Controls reversibly actin polymerization and depolymerization in a pH-sensitive manner. Its F-actin depolymerization activity is regulated by association with CSPR3 (PubMed:19752190). It has the ability to bind G- and F-actin in a 1:1 ratio of cofilin to actin. It is the major component of intranuclear and cytoplasmic actin rods. Required for muscle maintenance. May play a role during t…	Q9Y281	x		Q9Y281	6.25	0	0	0	0	0	0	0	0	0	0	0	0	0	0	0	0	0	0	0	0	0	0	0	0	0	0	0	0	0	0	0
						MYO5A	Q9Y4I1	Unconventional myosin-Va (Dilute myosin heavy chain, non-muscle) (Myosin heavy chain 12) (Myosin-12) (Myoxin)	FUNCTION: Processive actin-based motor that can move in large steps approximating the 36-nm pseudo-repeat of the actin filament. Involved in melanosome transport. Also mediates the transport of vesicles to the plasma membrane. May also be required for some polarization process involved in dendrite formation. {ECO:0000269|PubMed:10448864}.	Q9Y4I1	x		Q9Y4I1	24	0	0	0	0	0	0	0	0	0	0	0	0	0	0	0	0	0	0	0	0	0	0	0	0	0	0	0	0	0	0	0

## Sheet: C3
Baits in cluster 3						Preys in cluster 3					PSM average per bait
Uniprot	Bait	Frequency	PSM sum in cluster	% of PSMs		Name	Uniprot	Protein names	Function (Uniprot)	order in cluster		STAT3	MYC	STAT1	FOXL1
P40763	STAT3	16	456.34	82.2471		TBB4B	P68371	Tubulin beta-4B chain (Tubulin beta-2 chain) (Tubulin beta-2C chain)	FUNCTION: Tubulin is the major constituent of microtubules. It binds two moles of GTP, one at an exchangeable site on the beta chain and one at a non-exchangeable site on the alpha chain.	1	P68371	45.67	25.25	0	21
P01106	MYC	2	28.5	5.13662		ADT3	P12236	ADP/ATP translocase 3 (ADP,ATP carrier protein 3) (ADP,ATP carrier protein, isoform T2) (ANT 2) (Adenine nucleotide translocator 3) (ANT 3) (Solute carrier family 25 member 6) [Cleaved into: ADP/ATP translocase 3, N-terminally processed]	FUNCTION: Catalyzes the exchange of cytoplasmic ADP with mitochondrial ATP across the mitochondrial inner membrane. May participate in the formation of the permeability transition pore complex (PTPC) responsible for the release of mitochondrial products that triggers apoptosis. {ECO:0000269|PubMed:15033708}.	2	P12236	5.67	3.25	0	0
P42224	STAT1	1	49	8.83137		STAT3	P40763	Signal transducer and activator of transcription 3 (Acute-phase response factor)	FUNCTION: Signal transducer and transcription activator that mediates cellular responses to interleukins, KITLG/SCF, LEP and other growth factors (PubMed:10688651, PubMed:12359225, PubMed:12873986, PubMed:15194700, PubMed:17344214, PubMed:18242580, PubMed:23084476). Once activated, recruits coactivators, such as NCOA1 or MED1, to the promoter region of the target gene (PubMed:17344214). May media…	3	P40763	255	0	49	0
Q12952	FOXL1	1	21	3.78487		ARF3	P61204	ADP-ribosylation factor 3	FUNCTION: GTP-binding protein that functions as an allosteric activator of the cholera toxin catalytic subunit, an ADP-ribosyltransferase. Involved in protein trafficking; may modulate vesicle budding and uncoating within the Golgi apparatus.	4	P61204	3.33	0	0	0
						LRC49	Q8IUZ0	Leucine-rich repeat-containing protein 49 (Tubulin polyglutamylase complex subunit 4) (PGs4)		5	Q8IUZ0	7	0	0	0
						SYLC	Q9P2J5	Leucine--tRNA ligase, cytoplasmic (EC 6.1.1.4) (Leucyl-tRNA synthetase) (LeuRS)	FUNCTION: Catalyzes the specific attachment of an amino acid to its cognate tRNA in a two step reaction: the amino acid (AA) is first activated by ATP to form AA-AMP and then transferred to the acceptor end of the tRNA. Exhibits a post-transfer editing activity to hydrolyze mischarged tRNAs. {ECO:0000269|PubMed:19426743}.	6	Q9P2J5	8.67	0	0	0
						COPB	P53618	Coatomer subunit beta (Beta-coat protein) (Beta-COP)	FUNCTION: The coatomer is a cytosolic protein complex that binds to dilysine motifs and reversibly associates with Golgi non-clathrin-coated vesicles, which further mediate biosynthetic protein transport from the ER, via the Golgi up to the trans Golgi network. Coatomer complex is required for budding from Golgi membranes, and is essential for the retrograde Golgi-to-ER transport of dilysine-tagg…	7	P53618	17.33	0	0	0
						SH3K1	Q96B97	SH3 domain-containing kinase-binding protein 1 (CD2-binding protein 3) (CD2BP3) (Cbl-interacting protein of 85 kDa) (Human Src family kinase-binding protein 1) (HSB-1)	FUNCTION: Adapter protein involved in regulating diverse signal transduction pathways. Involved in the regulation of endocytosis and lysosomal degradation of ligand-induced receptor tyrosine kinases, including EGFR and MET/hepatocyte growth factor receptor, through an association with CBL and endophilins. The association with CBL, and thus the receptor internalization, may inhibited by an interac…	8	Q96B97	8.33	0	0	0
						RFLB	Q8N5W9	Refilin-B (Regulator of filamin protein B) (RefilinB)	FUNCTION: Involved in the regulation of the perinuclear actin network and nuclear shape through interaction with filamins. Plays an essential role in the formation of cartilaginous skeletal elements. {ECO:0000250|UniProtKB:Q5SVD0}.	9	Q8N5W9	9	0	0	0
						TPGS1	Q6ZTW0	Tubulin polyglutamylase complex subunit 1 (PGs1)	FUNCTION: May act in the targeting of the tubulin polyglutamylase complex. Required for the development of the spermatid flagellum (By similarity). {ECO:0000250}.	10	Q6ZTW0	6	0	0	0
						COPE	O14579	Coatomer subunit epsilon (Epsilon-coat protein) (Epsilon-COP)	FUNCTION: The coatomer is a cytosolic protein complex that binds to dilysine motifs and reversibly associates with Golgi non-clathrin-coated vesicles, which further mediate biosynthetic protein transport from the ER, via the Golgi up to the trans Golgi network. The coatomer complex is required for budding from Golgi membranes, and is essential for the retrograde Golgi-to-ER transport of dilysine-…	11	O14579	5.33	0	0	0
						COPA	P53621	Coatomer subunit alpha (Alpha-coat protein) (Alpha-COP) (HEP-COP) (HEPCOP) [Cleaved into: Xenin (Xenopsin-related peptide); Proxenin]	FUNCTION: The coatomer is a cytosolic protein complex that binds to dilysine motifs and reversibly associates with Golgi non-clathrin-coated vesicles, which further mediate biosynthetic protein transport from the ER, via the Golgi up to the trans Golgi network. Coatomer complex is required for budding from Golgi membranes, and is essential for the retrograde Golgi-to-ER transport of dilysine-tagg…	12	P53621	25.67	0	0	0
						TBB5	P07437	Tubulin beta chain (Tubulin beta-5 chain)	FUNCTION: Tubulin is the major constituent of microtubules. It binds two moles of GTP, one at an exchangeable site on the beta chain and one at a non-exchangeable site on the alpha chain.	13	P07437	49	0	0	0
						ARFG1	Q8N6T3	ADP-ribosylation factor GTPase-activating protein 1 (ARF GAP 1) (ADP-ribosylation factor 1 GTPase-activating protein) (ARF1 GAP) (ARF1-directed GTPase-activating protein)	FUNCTION: GTPase-activating protein (GAP) for the ADP ribosylation factor 1 (ARF1). Involved in membrane trafficking and /or vesicle transport. Promotes hydrolysis of the ARF1-bound GTP and thus, is required for the dissociation of coat proteins from Golgi-derived membranes and vesicles, a prerequisite for vesicle's fusion with target compartment. Probably regulates ARF1-mediated transport via it…	14	Q8N6T3	3.67	0	0	0
						EIF3L	Q9Y262	Eukaryotic translation initiation factor 3 subunit L (eIF3l) (Eukaryotic translation initiation factor 3 subunit 6-interacting protein) (Eukaryotic translation initiation factor 3 subunit E-interacting protein)	FUNCTION: Component of the eukaryotic translation initiation factor 3 (eIF-3) complex, which is required for several steps in the initiation of protein synthesis (PubMed:17581632, PubMed:25849773, PubMed:27462815). The eIF-3 complex associates with the 40S ribosome and facilitates the recruitment of eIF-1, eIF-1A, eIF-2:GTP:methionyl-tRNAi and eIF-5 to form the 43S pre-initiation complex (43S PIC…	15	Q9Y262	4	0	0	0
						HAUS4	Q9H6D7	HAUS augmin-like complex subunit 4	FUNCTION: Contributes to mitotic spindle assembly, maintenance of centrosome integrity and completion of cytokinesis as part of the HAUS augmin-like complex. {ECO:0000269|PubMed:19369198, ECO:0000269|PubMed:19427217}.	16	Q9H6D7	2.67	0	0	0

## Sheet: C4
Baits in cluster 4						Preys in cluster 4					PSM average per bait
Uniprot	Bait	Frequency	PSM sum in cluster	% of PSMs		Name	Uniprot	Protein names	Function (Uniprot)	order in cluster		NFKB1	STAT3
P19838	NFKB1	16	853.75	98.728		COPB2	P35606	Coatomer subunit beta' (Beta'-coat protein) (Beta'-COP) (p102)	FUNCTION: The coatomer is a cytosolic protein complex that binds to dilysine motifs and reversibly associates with Golgi non-clathrin-coated vesicles, which further mediate biosynthetic protein transport from the ER, via the Golgi up to the trans Golgi network. Coatomer complex is required for budding from Golgi membranes, and is essential for the retrograde Golgi-to-ER transport of dilysine-tagg…	1	P35606	25.75	11
P40763	STAT3	1	11	1.27204		SLF1	Q9BQI6	SMC5-SMC6 complex localization factor protein 1 (Ankyrin repeat domain-containing protein 32) (BRCT domain-containing protein 1) (Smc5/6 localization factor 1)	FUNCTION: Plays a role in the DNA damage response (DDR) pathway by regulating postreplication repair of UV-damaged DNA and genomic stability maintenance (PubMed:25931565). The SLF1-SLF2 complex acts to link RAD18 with the SMC5-SMC6 complex at replication-coupled interstrand cross-links (ICL) and DNA double-strand breaks (DSBs) sites on chromatin during DNA repair in response to stalled replicatio…	2	Q9BQI6	12	0
						RELB	Q01201	Transcription factor RelB (I-Rel)	FUNCTION: NF-kappa-B is a pleiotropic transcription factor which is present in almost all cell types and is involved in many biological processed such as inflammation, immunity, differentiation, cell growth, tumorigenesis and apoptosis. NF-kappa-B is a homo- or heterodimeric complex formed by the Rel-like domain-containing proteins RELA/p65, RELB, NFKB1/p105, NFKB1/p50, REL and NFKB2/p52. The dim…	3	Q01201	4.75	0
						HGS	O14964	Hepatocyte growth factor-regulated tyrosine kinase substrate (Hrs) (Protein pp110)	FUNCTION: Involved in intracellular signal transduction mediated by cytokines and growth factors. When associated with STAM, it suppresses DNA signaling upon stimulation by IL-2 and GM-CSF. Could be a direct effector of PI3-kinase in vesicular pathway via early endosomes and may regulate trafficking to early and late endosomes by recruiting clathrin. May concentrate ubiquitinated receptors within…	4	O14964	2.75	0
						REL	Q04864	Proto-oncogene c-Rel	FUNCTION: Proto-oncogene that may play a role in differentiation and lymphopoiesis. NF-kappa-B is a pleiotropic transcription factor which is present in almost all cell types and is involved in many biological processed such as inflammation, immunity, differentiation, cell growth, tumorigenesis and apoptosis. NF-kappa-B is a homo- or heterodimeric complex formed by the Rel-like domain-containing …	5	Q04864	19.75	0
						NFKB2	Q00653	Nuclear factor NF-kappa-B p100 subunit (DNA-binding factor KBF2) (H2TF1) (Lymphocyte translocation chromosome 10 protein) (Nuclear factor of kappa light polypeptide gene enhancer in B-cells 2) (Oncogene Lyt-10) (Lyt10) [Cleaved into: Nuclear factor NF-kappa-B p52 subunit]	FUNCTION: NF-kappa-B is a pleiotropic transcription factor present in almost all cell types and is the endpoint of a series of signal transduction events that are initiated by a vast array of stimuli related to many biological processes such as inflammation, immunity, differentiation, cell growth, tumorigenesis and apoptosis. NF-kappa-B is a homo- or heterodimeric complex formed by the Rel-like d…	6	Q00653	49.25	0
						IKBB	Q15653	NF-kappa-B inhibitor beta (NF-kappa-BIB) (I-kappa-B-beta) (IkB-B) (IkB-beta) (IkappaBbeta) (Thyroid receptor-interacting protein 9) (TR-interacting protein 9) (TRIP-9)	FUNCTION: Inhibits NF-kappa-B by complexing with and trapping it in the cytoplasm. However, the unphosphorylated form resynthesized after cell stimulation is able to bind NF-kappa-B allowing its transport to the nucleus and protecting it to further NFKBIA-dependent inactivation. Association with inhibitor kappa B-interacting NKIRAS1 and NKIRAS2 prevent its phosphorylation rendering it more resist…	7	Q15653	12.75	0
						JIP4	O60271	C-Jun-amino-terminal kinase-interacting protein 4 (JIP-4) (JNK-interacting protein 4) (Cancer/testis antigen 89) (CT89) (Human lung cancer oncogene 6 protein) (HLC-6) (JNK-associated leucine-zipper protein) (JLP) (Mitogen-activated protein kinase 8-interacting protein 4) (Proliferation-inducing protein 6) (Protein highly expressed in testis) (PHET) (Sperm surface protein) (Sperm-associated antige…	FUNCTION: The JNK-interacting protein (JIP) group of scaffold proteins selectively mediates JNK signaling by aggregating specific components of the MAPK cascade to form a functional JNK signaling module. Isoform 5 may play a role in spermatozoa-egg-interaction. {ECO:0000269|PubMed:14743216, ECO:0000269|PubMed:15693750}.	8	O60271	66.75	0
						TF65	Q04206	Transcription factor p65 (Nuclear factor NF-kappa-B p65 subunit) (Nuclear factor of kappa light polypeptide gene enhancer in B-cells 3)	FUNCTION: NF-kappa-B is a pleiotropic transcription factor present in almost all cell types and is the endpoint of a series of signal transduction events that are initiated by a vast array of stimuli related to many biological processes such as inflammation, immunity, differentiation, cell growth, tumorigenesis and apoptosis. NF-kappa-B is a homo- or heterodimeric complex formed by the Rel-like d…	9	Q04206	29.5	0
						TNIP1	Q15025	TNFAIP3-interacting protein 1 (A20-binding inhibitor of NF-kappa-B activation 1) (ABIN-1) (HIV-1 Nef-interacting protein) (Nef-associated factor 1) (Naf1) (Nip40-1) (Virion-associated nuclear shuttling protein) (VAN) (hVAN)	FUNCTION: Inhibits NF-kappa-B activation and TNF-induced NF-kappa-B-dependent gene expression by regulating A20/TNFAIP3-mediated deubiquitination of IKBKG; proposed to link A20/TNFAIP3 to ubiquitinated IKBKG. Involved in regulation of EGF-induced ERK1/ERK2 signaling pathway; blocks MAPK3/MAPK1 nuclear translocation and MAPK1-dependent transcription. Increases cell surface CD4(T4) antigen expressi…	10	Q15025	29.25	0
						NFKB1	P19838	Nuclear factor NF-kappa-B p105 subunit (DNA-binding factor KBF1) (EBP-1) (Nuclear factor of kappa light polypeptide gene enhancer in B-cells 1) [Cleaved into: Nuclear factor NF-kappa-B p50 subunit]	FUNCTION: NF-kappa-B is a pleiotropic transcription factor present in almost all cell types and is the endpoint of a series of signal transduction events that are initiated by a vast array of stimuli related to many biological processes such as inflammation, immunity, differentiation, cell growth, tumorigenesis and apoptosis. NF-kappa-B is a homo- or heterodimeric complex formed by the Rel-like d…	11	P19838	567	0
						IKBE	O00221	NF-kappa-B inhibitor epsilon (NF-kappa-BIE) (I-kappa-B-epsilon) (IkB-E) (IkB-epsilon) (IkappaBepsilon)	FUNCTION: Inhibits NF-kappa-B by complexing with and trapping it in the cytoplasm. Inhibits DNA-binding of NF-kappa-B p50-p65 and p50-c-Rel complexes. {ECO:0000269|PubMed:9315679}.	12	O00221	15.25	0
						TRIM9	Q9C026	E3 ubiquitin-protein ligase TRIM9 (EC 2.3.2.27) (RING finger protein 91) (RING-type E3 ubiquitin transferase TRIM9) (Tripartite motif-containing protein 9)	FUNCTION: E3 ubiquitin-protein ligase which ubiquitinates itself in cooperation with an E2 enzyme UBE2D2/UBC4 and serves as a targeting signal for proteasomal degradation. May play a role in regulation of neuronal functions and may also participate in the formation or breakdown of abnormal inclusions in neurodegenerative disorders. May act as a regulator of synaptic vesicle exocytosis by controll…	13	Q9C026	7.5	0
						IKBA	P25963	NF-kappa-B inhibitor alpha (I-kappa-B-alpha) (IkB-alpha) (IkappaBalpha) (Major histocompatibility complex enhancer-binding protein MAD3)	FUNCTION: Inhibits the activity of dimeric NF-kappa-B/REL complexes by trapping REL dimers in the cytoplasm through masking of their nuclear localization signals. On cellular stimulation by immune and proinflammatory responses, becomes phosphorylated promoting ubiquitination and degradation, enabling the dimeric RELA to translocate to the nucleus and activate transcription. {ECO:0000269|PubMed:74…	14	P25963	5	0
						TNIP2	Q8NFZ5	TNFAIP3-interacting protein 2 (A20-binding inhibitor of NF-kappa-B activation 2) (ABIN-2) (Fetal liver LKB1-interacting protein)	FUNCTION: Inhibits NF-kappa-B activation by blocking the interaction of RIPK1 with its downstream effector NEMO/IKBKG. Forms a ternary complex with NFKB1 and MAP3K8 but appears to function upstream of MAP3K8 in the TLR4 signaling pathway that regulates MAP3K8 activation. Involved in activation of the MEK/ERK signaling pathway during innate immune response; this function seems to be stimulus- and …	15	Q8NFZ5	2.75	0
						NEMO	Q9Y6K9	NF-kappa-B essential modulator (NEMO) (FIP-3) (IkB kinase-associated protein 1) (IKKAP1) (Inhibitor of nuclear factor kappa-B kinase subunit gamma) (I-kappa-B kinase subunit gamma) (IKK-gamma) (IKKG) (IkB kinase subunit gamma) (NF-kappa-B essential modifier)	FUNCTION: Regulatory subunit of the IKK core complex which phosphorylates inhibitors of NF-kappa-B thus leading to the dissociation of the inhibitor/NF-kappa-B complex and ultimately the degradation of the inhibitor. Its binding to scaffolding polyubiquitin seems to play a role in IKK activation by multiple signaling receptor pathways. However, the specific type of polyubiquitin recognized upon c…	16	Q9Y6K9	3.75	0

## Sheet: C5
Baits in cluster 5						Preys in cluster 5					PSM average per bait
Uniprot	Bait	Frequency	PSM sum in cluster	% of PSMs		Name	Uniprot	Protein names	Function (Uniprot)	order in cluster		NFYC	FEV	NFIX	PAX6	HNF4A	FOXL1	ETV6	STAT4	ELK3	ELF4	ELF2	KLF16
Q13952	NFYC	20	186	65.206		ASURF	L0R819	ASNSD1 upstream open reading frame protein (ASNSD1 small/short open reading frame-encoded polypeptide) (ASNSD1-SEP)		6	L0R819	2.5	0	0	0	0	0	0	0	0	0	0	0
Q99581	FEV	4	25	8.76424		RFXAP	O00287	Regulatory factor X-associated protein (RFX-associated protein) (RFX DNA-binding complex 36 kDa subunit)	FUNCTION: Part of the RFX complex that binds to the X-box of MHC II promoters.	18	O00287	5.75	0	3.25	3.5	3.25	0	0	0	0	0	0	0
Q14938	NFIX	4	22.75	7.97546		RFXK	O14593	DNA-binding protein RFXANK (Ankyrin repeat family A protein 1) (Regulatory factor X subunit B) (RFX-B) (Regulatory factor X-associated ankyrin-containing protein)	FUNCTION: Activates transcription from class II MHC promoters. Activation requires the activity of the MHC class II transactivator/CIITA. May regulate other genes in the cell. RFX binds the X1 box of MHC-II promoters (PubMed:9806546, PubMed:10072068, PubMed:10725724). May also potentiate the activation of RAF1 (By similarity). {ECO:0000250|UniProtKB:Q9Z205, ECO:0000269|PubMed:10072068, ECO:000026…	17	O14593	3	0	2.5	0	2.25	0	0	0	0	0	0	0
P41212	ETV6	1	13	4.55741		NFYA	P23511	Nuclear transcription factor Y subunit alpha (CAAT box DNA-binding protein subunit A) (Nuclear transcription factor Y subunit A) (NF-YA)	FUNCTION: Component of the sequence-specific heterotrimeric transcription factor (NF-Y) which specifically recognizes a 5'-CCAAT-3' box motif found in the promoters of its target genes. NF-Y can function as both an activator and a repressor, depending on its interacting cofactors. NF-YA positively regulates the transcription of the core clock component ARNTL/BMAL1. {ECO:0000269|PubMed:12741956}.	8	P23511	4	0	0	0	0	0	0	0	0	0	0	0
P26367	PAX6	2	11.75	4.11919		NFYB	P25208	Nuclear transcription factor Y subunit beta (CAAT box DNA-binding protein subunit B) (Nuclear transcription factor Y subunit B) (NF-YB)	FUNCTION: Component of the sequence-specific heterotrimeric transcription factor (NF-Y) which specifically recognizes a 5'-CCAAT-3' box motif found in the promoters of its target genes. NF-Y can function as both an activator and a repressor, depending on its interacting cofactors.	14	P25208	9.75	0	0	0	0	0	0	0	0	0	0	0
P41235	HNF4A	2	5.5	1.92813		STIP1	P31948	Stress-induced-phosphoprotein 1 (STI1) (Hsc70/Hsp90-organizing protein) (Hop) (Renal carcinoma antigen NY-REN-11) (Transformation-sensitive protein IEF SSP 3521)	FUNCTION: Acts as a co-chaperone for HSP90AA1 (PubMed:27353360). Mediates the association of the molecular chaperones HSPA8/HSC70 and HSP90 (By similarity). {ECO:0000250|UniProtKB:O35814, ECO:0000303|PubMed:27353360}.	2	P31948	5.75	0	0	0	0	0	0	0	0	0	0	0
Q14765	STAT4	1	4	1.40228		RFX5	P48382	DNA-binding protein RFX5 (Regulatory factor X 5)	FUNCTION: Activates transcription from class II MHC promoters. Recognizes X-boxes. Mediates cooperative binding between RFX and NF-Y. RFX binds the X1 box of MHC-II promoters.	19	P48382	19.75	14	11.75	8.25	0	0	0	0	0	0	0	0
Q15723	ELF2	1	4	1.40228		ZN143	P52747	Zinc finger protein 143 (SPH-binding factor) (Selenocysteine tRNA gene transcription-activating factor) (hStaf)	FUNCTION: Transcriptional activator. Activates the gene for selenocysteine tRNA (tRNAsec). Binds to the SPH motif of small nuclear RNA (snRNA) gene promoters. Participates in efficient U6 RNA polymerase III transcription via its interaction with CHD8. {ECO:0000269|PubMed:17938208, ECO:0000269|PubMed:9776743}.	20	P52747	3.25	3	5.25	0	0	0	0	0	0	0	4	3.5
P41970	ELK3	1	3.5	1.22699		CLH1	Q00610	Clathrin heavy chain 1 (Clathrin heavy chain on chromosome 17) (CLH-17)	FUNCTION: Clathrin is the major protein of the polyhedral coat of coated pits and vesicles. Two different adapter protein complexes link the clathrin lattice either to the plasma membrane or to the trans-Golgi network. Acts as component of the TACC3/ch-TOG/clathrin complex proposed to contribute to stabilization of kinetochore fibers of the mitotic spindle by acting as inter-microtubule bridge (P…	9	Q00610	4.75	0	0	0	0	0	0	0	0	0	0	0
Q99607	ELF4	1	3.5	1.22699		SP2	Q02086	Transcription factor Sp2	FUNCTION: Binds to GC box promoters elements and selectively activates mRNA synthesis from genes that contain functional recognition sites.	16	Q02086	13.5	4.5	0	0	0	0	0	0	3.5	3.5	0	0
Q9BXK1	KLF16	1	3.5	1.22699		FKBP4	Q02790	Peptidyl-prolyl cis-trans isomerase FKBP4 (PPIase FKBP4) (EC 5.2.1.8) (51 kDa FK506-binding protein) (FKBP51) (52 kDa FK506-binding protein) (52 kDa FKBP) (FKBP-52) (59 kDa immunophilin) (p59) (FK506-binding protein 4) (FKBP-4) (FKBP59) (HSP-binding immunophilin) (HBI) (Immunophilin FKBP52) (Rotamase) [Cleaved into: Peptidyl-prolyl cis-trans isomerase FKBP4, N-terminally processed]	FUNCTION: Immunophilin protein with PPIase and co-chaperone activities. Component of steroid receptors heterocomplexes through interaction with heat-shock protein 90 (HSP90). May play a role in the intracellular trafficking of heterooligomeric forms of steroid hormone receptors between cytoplasm and nuclear compartments. The isomerase activity controls neuronal growth cones via regulation of TRPC…	3	Q02790	10.25	0	0	0	0	0	0	0	0	0	0	0
Q12952	FOXL1	1	2.75	0.964067		TFCP2	Q12800	Alpha-globin transcription factor CP2 (SAA3 enhancer factor) (Transcription factor LSF)	FUNCTION: Binds a variety of cellular and viral promoters including fibrinogen, alpha-globin, SV40 and HIV-1 promoters. Activation of the alpha-globin promoter in erythroid cells is via synergistic interaction with UBP1 (By similarity). Functions as part of the SSP (stage selector protein) complex. Facilitates the interaction of the gamma-globin genes with enhancer elements contained in the locus…	13	Q12800	2.5	0	0	0	0	0	0	0	0	0	0	0
						NFYC	Q13952	Nuclear transcription factor Y subunit gamma (CAAT box DNA-binding protein subunit C) (Nuclear transcription factor Y subunit C) (NF-YC) (Transactivator HSM-1/2)	FUNCTION: Component of the sequence-specific heterotrimeric transcription factor (NF-Y) which specifically recognizes a 5'-CCAAT-3' box motif found in the promoters of its target genes. NF-Y can function as both an activator and a repressor, depending on its interacting cofactors.	12	Q13952	49.25	0	0	0	0	0	0	0	0	0	0	0
						CDC37	Q16543	Hsp90 co-chaperone Cdc37 (Hsp90 chaperone protein kinase-targeting subunit) (p50Cdc37) [Cleaved into: Hsp90 co-chaperone Cdc37, N-terminally processed]	FUNCTION: Co-chaperone that binds to numerous kinases and promotes their interaction with the Hsp90 complex, resulting in stabilization and promotion of their activity (PubMed:8666233). Inhibits HSP90AA1 ATPase activity (PubMed:23569206). {ECO:0000269|PubMed:23569206, ECO:0000269|PubMed:8666233}.	11	Q16543	12.5	0	0	0	0	0	0	0	0	0	0	0
						RFX7	Q2KHR2	DNA-binding protein RFX7 (Regulatory factor X 7) (Regulatory factor X domain-containing protein 2)		4	Q2KHR2	6	0	0	0	0	0	0	0	0	0	0	0
						ST134	Q8IZP2	Putative protein FAM10A4 (Suppression of tumorigenicity 13 pseudogene 4)		7	Q8IZP2	3	0	0	0	0	0	0	0	0	0	0	0
						ALMS1	Q8TCU4	Alstrom syndrome protein 1	FUNCTION: Involved in PCM1-dependent intracellular transport. Required, directly or indirectly, for the localization of NCAPD2 to the proximal ends of centrioles. Required for proper formation and/or maintenance of primary cilia (PC), microtubule-based structures that protrude from the surface of epithelial cells. {ECO:0000269|PubMed:17954613}.	1	Q8TCU4	4.25	0	0	0	0	0	13	4	0	0	0	0
						METH	Q99707	Methionine synthase (EC 2.1.1.13) (5-methyltetrahydrofolate--homocysteine methyltransferase) (Vitamin-B12 dependent methionine synthase) (MS)	FUNCTION: Catalyzes the transfer of a methyl group from methyl-cobalamin to homocysteine, yielding enzyme-bound cob(I)alamin and methionine. Subsequently, remethylates the cofactor using methyltetrahydrofolate (By similarity). {ECO:0000250}.	10	Q99707	4.5	0	0	0	0	0	0	0	0	0	0	0
						YYAP1	Q9H869	YY1-associated protein 1 (Hepatocellular carcinoma susceptibility protein) (Hepatocellular carcinoma-associated protein 2)	FUNCTION: Associates with the INO80 chromatin remodeling complex, which is responsible for transcriptional regulation, DNA repair, and replication (PubMed:27939641). Enhances transcription activation by YY1 (PubMed:14744866). Plays a role in cell cycle regulation (PubMed:17541814, PubMed:27939641). {ECO:0000269|PubMed:14744866, ECO:0000269|PubMed:17541814, ECO:0000269|PubMed:27939641}.	15	Q9H869	11.25	3.5	0	0	0	2.75	0	0	0	0	0	0
						CYBP	Q9HB71	Calcyclin-binding protein (CacyBP) (hCacyBP) (S100A6-binding protein) (Siah-interacting protein)	FUNCTION: May be involved in calcium-dependent ubiquitination and subsequent proteasomal degradation of target proteins. Probably serves as a molecular bridge in ubiquitin E3 complexes. Participates in the ubiquitin-mediated degradation of beta-catenin (CTNNB1). {ECO:0000269|PubMed:16085652}.	5	Q9HB71	10.5	0	0	0	0	0	0	0	0	0	0	0

## Sheet: C6
Baits in cluster 6						Preys in cluster 6					PSM average per bait
Uniprot	Bait	Frequency	PSM sum in cluster	% of PSMs		Name	Uniprot	Protein names	Function (Uniprot)	order in cluster		KLF12	SOX2	TLX2	LHX2	TLX3	KLF16	KLF8	SOX15	ETV3	KLF9	KLF6	SP7	LHX1	KLF3	NHLH1	KLF15	KLF5	SOX17	LHX4	SOX6	ELK3	LHX3	SOX5	ELF1	FEV	YY1	SOX4	ELF4	ETV4	NFATC4	PAX9	NFIX	PAX6	STAT4	EN1	TEAD1	TLX1	VSX1
Q9Y4X4	KLF12	60	752.5	20.5288		MTA3	Q9BTC8	Metastasis-associated protein MTA3	FUNCTION: Plays a role in maintenance of the normal epithelial architecture through the repression of SNAI1 transcription in a histone deacetylase-dependent manner, and thus the regulation of E-cadherin levels. Contributes to transcriptional repression by BCL6. {ECO:0000269|PubMed:12705869, ECO:0000269|PubMed:15454082}.	1	Q9BTC8	16	0	0	0	0	0	0	0	0	0	0	4.5	0	26.5	0	0	0	0	0	3.5	5	0	0	0	4.5	0	0	0	0	0	2	3	0	0	0	5	2.75	0
P48431	SOX2	35	257	7.01117		P66A	Q86YP4	Transcriptional repressor p66-alpha (Hp66alpha) (GATA zinc finger domain-containing protein 2A)	FUNCTION: Transcriptional repressor. Enhances MBD2-mediated repression. Efficient repression requires the presence of GATAD2B. {ECO:0000269|PubMed:12183469, ECO:0000269|PubMed:16415179}.	2	Q86YP4	28	0	0	0	0	0	0	0	5	5.5	7	7.5	6	0	4.5	4	5.5	0	0	0	0	4.5	0	4	0	0	0	0	0	0	0	0	0	0	0	0	0	0
O43763	TLX2	31	181	4.93783		PRD16	Q9HAZ2	PR domain zinc finger protein 16 (PR domain-containing protein 16) (Transcription factor MEL1) (MDS1/EVI1-like gene 1)	FUNCTION: Binds DNA and functions as a transcriptional regulator. Functions in the differentiation of brown adipose tissue (BAT) which is specialized in dissipating chemical energy in the form of heat in response to cold or excess feeding while white adipose tissue (WAT) is specialized in the storage of excess energy and the control of systemic metabolism. Together with CEBPB, regulates the diffe…	3	Q9HAZ2	5.5	0	0	0	0	0	0	0	0	4	6.5	4.5	4	0	4.25	0	0	5	0	0	0	0	0	0	0	0	0	0	0	0	0	0	0	0	0	0	0	0
P50458	LHX2	28	230	6.27459		CTBP2	P56545	C-terminal-binding protein 2 (CtBP2)	FUNCTION: Corepressor targeting diverse transcription regulators. Functions in brown adipose tissue (BAT) differentiation (By similarity). {ECO:0000250}.; FUNCTION: Isoform 2 probably acts as a scaffold for specialized synapses.	4	P56545	15	0	0	0	0	0	12	0	0	0	0	0	0	0	0	0	0	0	0	0	0	0	0	0	0	0	25.5	0	0	0	0	0	0	0	0	0	0	0
O43711	TLX3	28	183	4.99239		CTBP1	Q13363	C-terminal-binding protein 1 (CtBP1) (EC 1.1.1.-)	FUNCTION: Corepressor targeting diverse transcription regulators such as GLIS2 or BCL6. Has dehydrogenase activity. Involved in controlling the equilibrium between tubular and stacked structures in the Golgi complex. Functions in brown adipose tissue (BAT) differentiation. {ECO:0000269|PubMed:12419229, ECO:0000269|PubMed:15542832, ECO:0000269|PubMed:18212045, ECO:0000269|PubMed:19103759, ECO:0000…	5	Q13363	12.5	0	0	0	0	0	9	0	0	0	0	0	0	0	0	0	0	0	0	0	0	0	0	0	0	0	0	0	0	0	0	0	0	0	0	0	0	0
O95600	KLF8	23	190.5	5.19699		MECOM	Q03112	MDS1 and EVI1 complex locus protein (Ecotropic virus integration site 1 protein homolog) (EVI-1) (Myelodysplasia syndrome 1 protein) (Myelodysplasia syndrome-associated protein 1)	FUNCTION: Isoform 1: Functions as a transcriptional regulator binding to DNA sequences in the promoter region of target genes and regulating positively or negatively their expression. Oncogene which plays a role in development, cell proliferation and differentiation. May also play a role in apoptosis through regulation of the JNK and TGF-beta signaling. Involved in hematopoiesis. {ECO:0000269|Pub…	6	Q03112	9.5	0	0	0	0	2	6	0	0	0	0	0	0	3	0	0	3	0	0	0	0	0	0	0	0	0	0	0	0	0	0	0	0	0	0	0	0	2
Q9BXK1	KLF16	23	160.5	4.37857		RL23	P62829	60S ribosomal protein L23 (60S ribosomal protein L17) (Large ribosomal subunit protein uL14)		7	P62829	21.5	0	0	0	0	0	0	0	0	0	0	0	0	0	0	0	0	0	0	0	0	0	0	0	0	0	0	0	0	0	0	0	0	0	0	0	0	0
O60248	SOX15	22	111	3.02817		RL28	P46779	60S ribosomal protein L28 (Large ribosomal subunit protein eL28)	FUNCTION: Component of the large ribosomal subunit. {ECO:0000305|PubMed:12962325}.	8	P46779	14	0	0	0	0	0	0	0	0	0	0	10	0	0	0	0	0	0	0	0	0	0	0	0	9	0	0	0	0	0	0	0	0	0	0	0	0	0
Q13886	KLF9	19	145	3.95572		RS30	P62861	40S ribosomal protein S30 (Small ribosomal subunit protein eS30)		9	P62861	5	0	0	0	0	0	0	0	0	0	0	0	0	0	0	0	0	0	0	0	0	0	0	0	0	0	0	0	0	0	0	0	0	0	0	0	0	0
P41162	ETV3	19	101.5	2.769		PRDM2	Q13029	PR domain zinc finger protein 2 (EC 2.1.1.43) (GATA-3-binding protein G3B) (Lysine N-methyltransferase 8) (MTB-ZF) (MTE-binding protein) (PR domain-containing protein 2) (Retinoblastoma protein-interacting zinc finger protein) (Zinc finger protein RIZ)	FUNCTION: S-adenosyl-L-methionine-dependent histone methyltransferase that specifically methylates 'Lys-9' of histone H3. May function as a DNA-binding transcription factor. Binds to the macrophage-specific TPA-responsive element (MTE) of the HMOX1 (heme oxygenase 1) gene and may act as a transcriptional activator of this gene. {ECO:0000269|PubMed:14633678}.	10	Q13029	15.5	0	0	0	0	0	14	0	8	6	7	0	0	0	4.25	5	4	0	0	0	0	0	0	0	0	0	0	0	0	0	0	0	0	0	0	0	0	0
Q99612	KLF6	17	108.5	2.95997		ZN516	Q92618	Zinc finger protein 516	FUNCTION: Transcriptional regulator that binds to the promoter and activates the transcription of genes promoting brown adipose tissue (BAT) differentiation. Among brown adipose tissue-specific genes, binds the proximal region of the promoter of the UCP1 gene to activate its transcription and thereby regulate thermogenesis (By similarity). May also play a role in the cellular response to replicat…	11	Q92618	31.5	0	0	0	0	0	24	0	0	0	0	0	0	14	0	0	0	0	0	0	0	0	0	0	0	0	0	0	0	0	0	0	0	0	0	0	0	0
Q8TDD2	SP7	17	82	2.23703		ZN217	O75362	Zinc finger protein 217	FUNCTION: Binds to the promoters of target genes and functions as repressor. Promotes cell proliferation and antagonizes cell death. Promotes phosphorylation of AKT1 at 'Ser-473'. {ECO:0000269|PubMed:16203743, ECO:0000269|PubMed:16940172, ECO:0000269|PubMed:17259635, ECO:0000269|PubMed:18625718}.	12	O75362	25	0	0	0	0	0	29	0	0	0	0	2	0	0	0	3	0	2	0	0	0	0	0	0	0	0	0	0	0	0	0	0	0	0	0	0	0	0
P57682	KLF3	16	209.5	5.71533		CPVL	Q9H3G5	Probable serine carboxypeptidase CPVL (EC 3.4.16.-) (Carboxypeptidase, vitellogenic-like) (Vitellogenic carboxypeptidase-like protein) (VCP-like protein) (hVLP)	FUNCTION: May be involved in the digestion of phagocytosed particles in the lysosome, participation in an inflammatory protease cascade, and trimming of peptides for antigen presentation.	13	Q9H3G5	9.5	0	0	0	2.5	5	3	0	0	0	0	3	0	0	0	0	0	0	0	0	0	0	0	0	0	0	0	0	0	0	0	0	0	0	0	0	0	0
P48742	LHX1	16	108	2.94633		RS27L	Q71UM5	40S ribosomal protein S27-like (Small ribosomal subunit protein eS27-like)		14	Q71UM5	5	0	2	0	4	0	3	0	0	0	0	0	0	11.5	0	0	0	0	0	12	0	0	0	0	0	0	0	0	0	0	0	0	0	0	0	0	0	0
Q02575	NHLH1	15	95.5	2.60532		EMD	P50402	Emerin	FUNCTION: Stabilizes and promotes the formation of a nuclear actin cortical network. Stimulates actin polymerization in vitro by binding and stabilizing the pointed end of growing filaments. Inhibits beta-catenin activity by preventing its accumulation in the nucleus. Acts by influencing the nuclear accumulation of beta-catenin through a CRM1-dependent export pathway. Links centrosomes to the nuc…	15	P50402	5	0	0	0	2.5	0	0	0	0	0	0	0	0	0	0	0	0	0	0	0	0	0	0	0	0	0	0	0	0	0	0	0	0	0	0	0	0	0
Q9UIH9	KLF15	13	88	2.40071		RFX1	P22670	MHC class II regulatory factor RFX1 (Enhancer factor C) (EF-C) (Regulatory factor X 1) (RFX) (Transcription factor RFX1)	FUNCTION: Regulatory factor essential for MHC class II genes expression. Binds to the X boxes of MHC class II genes. Also binds to an inverted repeat (ENH1) required for hepatitis B virus genes expression and to the most upstream element (alpha) of the RPL30 promoter.	16	P22670	13	0	0	0	0	0	0	0	0	0	0	0	0	22	0	0	0	0	0	0	0	0	0	0	0	0	0	0	0	0	0	0	0	0	0	0	0	0
Q13887	KLF5	11	67	1.82781		TFAM	Q00059	Transcription factor A, mitochondrial (mtTFA) (Mitochondrial transcription factor 1) (MtTF1) (Transcription factor 6) (TCF-6) (Transcription factor 6-like 2)	FUNCTION: Binds to the mitochondrial light strand promoter and functions in mitochondrial transcription regulation (PubMed:29445193). Required for accurate and efficient promoter recognition by the mitochondrial RNA polymerase. Promotes transcription initiation from the HSP1 and the light strand promoter by binding immediately upstream of transcriptional start sites. Is able to unwind DNA. Bends …	17	Q00059	7	0	0	3	6.5	0	0	0	0	0	0	0	0	0	0	0	0	0	0	0	0	0	0	0	0	0	0	0	0	0	0	0	0	0	0	0	0	0
Q9H6I2	SOX17	9	44.5	1.214		TFE3	P19532	Transcription factor E3 (Class E basic helix-loop-helix protein 33) (bHLHe33)	FUNCTION: Transcription factor that specifically recognizes and binds E-box sequences (5'-CANNTG-3'). Efficient DNA-binding requires dimerization with itself or with another MiT/TFE family member such as TFEB or MITF. In association with TFEB, activates the expression of CD40L in T-cells, thereby playing a role in T-cell-dependent antibody responses in activated CD4(+) T-cells and thymus-dependen…	18	P19532	2	5	0	0	2.5	2.5	2.5	0	0	0	0	0	0	4	0	0	0	0	0	0	0	0	0	0	0	0	0	0	0	0	0	0	0	0	0	0	0	0
P35712	SOX6	8	88.5	2.41435		RL26L	Q9UNX3	60S ribosomal protein L26-like 1 (Large ribosomal subunit protein uL24-like 1)		19	Q9UNX3	22	0	0	14.5	0	11	14.5	0	0	0	0	0	0	0	0	0	0	0	0	0	0	0	0	0	0	0	0	0	0	0	0	0	0	0	0	0	0	0
Q969G2	LHX4	8	43	1.17307		DDX18	Q9NVP1	ATP-dependent RNA helicase DDX18 (EC 3.6.4.13) (DEAD box protein 18) (Myc-regulated DEAD box protein) (MrDb)	FUNCTION: Probable RNA-dependent helicase.	20	Q9NVP1	7	0	6	0	0	6.5	0	0	0	0	0	0	0	0	0	0	0	0	0	0	0	0	0	0	0	0	0	0	0	0	0	0	0	0	0	0	0	0
P41970	ELK3	7	33.5	0.913907		RGAP1	Q9H0H5	Rac GTPase-activating protein 1 (Male germ cell RacGap) (MgcRacGAP) (Protein CYK4 homolog) (CYK4) (HsCYK-4)	FUNCTION: Component of the centralspindlin complex that serves as a microtubule-dependent and Rho-mediated signaling required for the myosin contractile ring formation during the cell cycle cytokinesis. Required for proper attachment of the midbody to the cell membrane during cytokinesis. Plays key roles in controlling cell growth and differentiation of hematopoietic cells through mechanisms othe…	21	Q9H0H5	5	0	0	0	0	5	0	0	0	0	0	0	0	0	0	2.5	0	0	0	0	0	0	0	0	0	0	0	0	0	0	0	0	0	0	0	0	0	0
Q9UBR4	LHX3	7	30.5	0.832065		RL26	P61254	60S ribosomal protein L26 (Large ribosomal subunit protein uL24)	FUNCTION: Component of the large ribosomal subunit. {ECO:0000305|PubMed:26100019}.	22	P61254	31	0	0	0	0	0	0	0	0	0	0	0	0	0	0	0	0	0	0	0	0	0	0	0	0	0	0	0	0	0	0	0	0	0	0	0	0	0
P35711	SOX5	6	69	1.88238		KLF12	Q9Y4X4	Krueppel-like factor 12 (Transcriptional repressor AP-2rep)	FUNCTION: Confers strong transcriptional repression to the AP-2-alpha gene. Binds to a regulatory element (A32) in the AP-2-alpha gene promoter.	23	Q9Y4X4	94.5	0	0	0	0	0	0	0	0	0	0	0	0	0	0	0	0	0	0	0	0	0	0	0	0	0	0	0	0	0	0	0	0	0	0	0	0	0
P32519	ELF1	6	23	0.627459		RT02	Q9Y399	28S ribosomal protein S2, mitochondrial (MRP-S2) (S2mt) (Mitochondrial small ribosomal subunit protein uS2m)	FUNCTION: Required for mitoribosome formation and stability, and mitochondrial translation. {ECO:0000269|PubMed:29576219}.	24	Q9Y399	8	0	0	0	0	0	0	0	0	0	0	0	0	0	0	0	0	0	0	0	0	0	0	0	0	0	0	0	0	0	0	0	0	0	0	0	0	0
Q06945	SOX4	4	45	1.22764		RL35A	P18077	60S ribosomal protein L35a (Cell growth-inhibiting gene 33 protein) (Large ribosomal subunit protein eL33)	FUNCTION: Required for the proliferation and viability of hematopoietic cells. Plays a role in 60S ribosomal subunit formation. The protein was found to bind to both initiator and elongator tRNAs and consequently was assigned to the P site or P and A site. {ECO:0000269|PubMed:18535205}.	25	P18077	9.5	0	0	0	0	0	0	0	0	0	0	0	0	8	0	0	0	7.5	3.5	0	3.5	0	2.5	0	0	0	6	0	3	7	0	0	0	4	0	0	0	0
Q99581	FEV	4	27.5	0.750222		RT11	P82912	28S ribosomal protein S11, mitochondrial (MRP-S11) (S11mt) (Cervical cancer proto-oncogene 2 protein) (HCC-2) (Mitochondrial small ribosomal subunit protein uS11m)		26	P82912	4.5	0	0	0	0	0	0	0	0	0	0	0	0	7	0	0	0	0	0	3.5	8	0	0	0	4	0	0	0	0	0	0	0	0	0	0	0	0	0
P25490	YY1	4	16.75	0.456954		RT24	Q96EL2	28S ribosomal protein S24, mitochondrial (MRP-S24) (S24mt) (Mitochondrial small ribosomal subunit protein uS3m) (bMRP-47) (bMRP47)		27	Q96EL2	5	0	0	0	0	0	0	0	0	0	0	0	0	5.5	0	0	0	0	0	0	0	0	0	0	0	0	0	0	0	0	0	0	0	0	0	0	0	0
Q14934	NFATC4	3	18.5	0.504695		B3GL2	Q8NCR0	UDP-GalNAc:beta-1,3-N-acetylgalactosaminyltransferase 2 (Beta-1,3-GalNAc-T2) (EC 2.4.1.313) (Beta-1,3-N-acetylgalactosaminyltransferase II)	FUNCTION: Beta-1,3-N-acetylgalactosaminyltransferase that synthesizes a unique carbohydrate structure, GalNAc-beta-1-3GlcNAc, on N- and O-glycans. Has no galactose nor galactosaminyl transferase activity toward any acceptor substrate. Involved in alpha-dystroglycan (DAG1) glycosylation: acts coordinately with GTDC2/POMGnT2 to synthesize a GalNAc-beta3-GlcNAc-beta-terminus at the 4-position of pro…	28	Q8NCR0	9	0	0	0	0	0	0	0	0	0	0	0	0	9	0	0	0	0	0	5.5	2	0	0	0	0	0	0	0	0	0	0	0	0	0	0	0	0	0
Q99607	ELF4	3	9	0.245527		RS24	P62847	40S ribosomal protein S24 (Small ribosomal subunit protein eS24)	FUNCTION: Required for processing of pre-rRNA and maturation of 40S ribosomal subunits. {ECO:0000269|PubMed:18230666}.	29	P62847	11.5	0	0	0	0	0	0	0	3.5	7.5	4.5	2.5	4.5	0	0	5.5	5.5	3	3	0	4	0	0	3.5	0	2.25	3.5	0	0	4	0	0	0	2.5	2.25	0	0	0
P43268	ETV4	3	8	0.218246		RT07	Q9Y2R9	28S ribosomal protein S7, mitochondrial (MRP-S7) (S7mt) (Mitochondrial small ribosomal subunit protein uS7m) (bMRP-27a) (bMRP27a)		30	Q9Y2R9	10	0	3.5	0	0	0	0	0	5.5	5	0	0	3	0	0	0	0	0	0	0	0	0	0	0	0	0	0	0	0	0	0	0	0	0	0	0	0	0
P55771	PAX9	3	8	0.218246		RT35	P82673	28S ribosomal protein S35, mitochondrial (MRP-S35) (S35mt) (28S ribosomal protein S28, mitochondrial) (MRP-S28) (S28mt) (Mitochondrial small ribosomal subunit protein mS35)		31	P82673	10.5	0	3	0	2	0	0	0	0	0	0	0	0	0	0	0	0	0	0	0	0	0	0	0	0	0	0	0	0	0	0	0	0	0	0	0	0	0
P26367	PAX6	2	11.75	0.32055		RT22	P82650	28S ribosomal protein S22, mitochondrial (MRP-S22) (S22mt) (Mitochondrial small ribosomal subunit protein mS22)		32	P82650	16.5	2.5	3.5	0	3.5	0	0	2.5	2	0	3	3	0	0	0	0	0	0	0	0	0	0	2.5	2.5	0	0	0	2	0	0	0	0	0	0	0	0	0	0
Q05925	EN1	2	10.75	0.293269		PTCD3	Q96EY7	Pentatricopeptide repeat domain-containing protein 3, mitochondrial (28S ribosomal protein S39, mitochondrial) (MRP-S39) (Mitochondrial small ribosomal subunit protein mS39) (Transformation-related gene 15 protein) (TRG-15)	FUNCTION: Mitochondrial RNA-binding protein that has a role in mitochondrial translation. {ECO:0000269|PubMed:19427859}.	33	Q96EY7	14.5	2.5	4.5	0	0	0	0	4	4	0	0	6.5	10.5	0	0	0	0	4.5	0	0	5.5	0	0	4.5	0	0	0	0	0	0	0	0	0	0	0	0	0	0
P28347	TEAD1	2	10.25	0.279628		RT31	Q92665	28S ribosomal protein S31, mitochondrial (MRP-S31) (S31mt) (Imogen 38) (Mitochondrial small ribosomal subunit protein mS31)		34	Q92665	9.5	2.5	6.5	0	0	0	0	3	0	0	0	0	0	29.5	0	0	0	0	0	30.5	0	0	28.5	0	0	0	0	0	0	0	0	0	0	0	0	0	0	0
Q14938	NFIX	2	9.5	0.259168		RT27	Q92552	28S ribosomal protein S27, mitochondrial (MRP-S27) (S27mt) (Mitochondrial ribosomal protein S27) (Mitochondrial small ribosomal subunit protein mS27)	FUNCTION: RNA-binding component of the mitochondrial small ribosomal subunit (mt-SSU) that plays a role in mitochondrial protein synthesis (PubMed:22841715). Stimulates mitochondrial mRNA translation of subunit components of the mitochondrial electron transport chain (PubMed:22841715). Binds to the mitochondrial 12S rRNA (12S mt-rRNA) and tRNA(Glu) (PubMed:22841715). Involved also in positive reg…	35	Q92552	7.5	3	6.5	0	3	0	0	4.5	0	15	13.5	0	8	0	12	11	10	0	0	0	0	0	0	0	0	0	0	0	0	0	0	0	0	0	0	0	0	0
Q14765	STAT4	2	6.5	0.177325		RT34	P82930	28S ribosomal protein S34, mitochondrial (MRP-S34) (S34mt) (Mitochondrial small ribosomal subunit protein mS34)	FUNCTION: Required for mitochondrial translation, plays a role in maintaining the stability of the small ribosomal subunit and the 12S rRNA that are required for mitoribosome formation. {ECO:0000269|PubMed:28777931}.	36	P82930	9.5	4	5.5	4.5	0	0	0	3.5	3	3	2.5	0	0	0	3.5	0	0	0	0	0	0	0	0	0	0	0	0	0	0	0	0	0	0	0	0	0	0	0
P31314	TLX1	2	5.5	0.150044		RT05	P82675	28S ribosomal protein S5, mitochondrial (MRP-S5) (S5mt) (Mitochondrial small ribosomal subunit protein uS5m)		37	P82675	16	3.5	6	3.5	5	3.5	2.5	0	0	0	0	0	0	0	0	0	0	0	0	0	0	0	0	0	0	0	0	0	0	0	0	0	0	0	0	0	0	0
Q9NZR4	VSX1	2	5	0.136404		RT26	Q9BYN8	28S ribosomal protein S26, mitochondrial (MRP-S26) (S26mt) (28S ribosomal protein S13, mitochondrial) (MRP-S13) (S13mt) (Mitochondrial small ribosomal subunit protein mS26)		38	Q9BYN8	6	2	2.5	0	3	2.5	0	0	0	0	0	0	0	0	0	0	0	0	0	0	0	0	0	0	0	0	0	0	0	0	0	0	0	0	0	0	0	0
Q92766	RREB1	1	19.25	0.525156		RT09	P82933	28S ribosomal protein S9, mitochondrial (MRP-S9) (S9mt) (Mitochondrial small ribosomal subunit protein uS9m)		39	P82933	11	4	4	0	4.5	0	0	0	0	0	0	4	0	30	0	18	0	0	0	0	0	0	0	0	0	0	0	0	0	0	0	0	3	0	0	5.25	2.75	3
P10242	MYB	1	6.75	0.184145		XRCC6	P12956	X-ray repair cross-complementing protein 6 (EC 3.6.4.-) (EC 4.2.99.-) (5'-deoxyribose-5-phosphate lyase Ku70) (5'-dRP lyase Ku70) (70 kDa subunit of Ku antigen) (ATP-dependent DNA helicase 2 subunit 1) (ATP-dependent DNA helicase II 70 kDa subunit) (CTC box-binding factor 75 kDa subunit) (CTC75) (CTCBF) (DNA repair protein XRCC6) (Lupus Ku autoantigen protein p70) (Ku70) (Thyroid-lupus autoantige…	FUNCTION: Single-stranded DNA-dependent ATP-dependent helicase. Has a role in chromosome translocation. The DNA helicase II complex binds preferentially to fork-like ends of double-stranded DNA in a cell cycle-dependent manner. It works in the 3'-5' direction. Binding to DNA may be mediated by XRCC6. Involved in DNA non-homologous end joining (NHEJ) required for double-strand break repair and V(D…	40	P12956	28.5	27	0	0	34.5	0	0	0	0	0	0	0	0	0	0	0	0	0	0	0	0	0	0	0	0	0	0	0	0	0	0	0	0	0	0	0	0	0
O43474	KLF4	1	5.25	0.143224		FBRL	P22087	rRNA 2'-O-methyltransferase fibrillarin (EC 2.1.1.-) (34 kDa nucleolar scleroderma antigen) (Histone-glutamine methyltransferase)	FUNCTION: S-adenosyl-L-methionine-dependent methyltransferase that has the ability to methylate both RNAs and proteins. Involved in pre-rRNA processing by catalyzing the site-specific 2'-hydroxyl methylation of ribose moieties in pre-ribosomal RNA. Site specificity is provided by a guide RNA that base pairs with the substrate. Methylation occurs at a characteristic distance from the sequence invo…	41	P22087	7	7	0	0	0	0	0	0	0	0	0	0	0	0	0	0	0	0	0	0	0	0	0	0	0	0	0	0	0	0	0	0	0	0	0	0	0	0
P15172	MYOD1	1	4	0.109123		RL13A	P40429	60S ribosomal protein L13a (23 kDa highly basic protein) (Large ribosomal subunit protein uL13)	FUNCTION: Associated with ribosomes but is not required for canonical ribosome function and has extra-ribosomal functions. Component of the GAIT (gamma interferon-activated inhibitor of translation) complex which mediates interferon-gamma-induced transcript-selective translation inhibition in inflammation processes. Upon interferon-gamma activation and subsequent phosphorylation dissociates from …	42	P40429	19	16.5	0	18	0	0	0	0	0	0	0	0	0	0	0	0	0	0	0	0	0	0	0	0	0	0	0	0	0	0	0	0	0	0	0	0	0	0
P23769	GATA2	1	3.25	0.0886626		RL7L	Q6DKI1	60S ribosomal protein L7-like 1 (Large ribosomal subunit protein uL30-like 1)		43	Q6DKI1	3	3	0	6	0	0	0	0	4	5	4.5	0	6	0	2.5	4	2.5	0	0	0	0	2.5	0	0	0	0	0	0	0	0	0	0	0	0	0	0	0	0
P35680	HNF1B	1	3.25	0.0886626		RRP5	Q14690	Protein RRP5 homolog (NF-kappa-B-binding protein) (NFBP) (Programmed cell death protein 11)	FUNCTION: Essential for the generation of mature 18S rRNA, specifically necessary for cleavages at sites A0, 1 and 2 of the 47S precursor. Directly interacts with U3 snoRNA. {ECO:0000269|PubMed:17654514}.; FUNCTION: Involved in the biogenesis of rRNA. {ECO:0000250}.	44	Q14690	5.5	7	5.5	10	0	0	0	6	12	11.5	9	0	8	0	7.25	10	0	0	0	0	0	6.5	0	0	10	6.75	0	0	0	0	0	6.5	8.75	0	0	0	0	0
Q02556	IRF8	1	3	0.0818424		DDX56	Q9NY93	Probable ATP-dependent RNA helicase DDX56 (EC 3.6.4.13) (ATP-dependent 61 kDa nucleolar RNA helicase) (DEAD box protein 21) (DEAD box protein 56)	FUNCTION: May play a role in later stages of the processing of the pre-ribosomal particles leading to mature 60S ribosomal subunits. Has intrinsic ATPase activity.	45	Q9NY93	7.5	6.5	5	8.5	4.5	3	2.5	3	0	8.5	9.5	7.5	0	0	8.5	7.5	0	0	0	0	0	0	0	0	0	0	0	0	0	0	0	0	0	0	0	0	0	0
Q68G74	LHX8	1	3	0.0818424		DDX50	Q9BQ39	ATP-dependent RNA helicase DDX50 (EC 3.6.4.13) (DEAD box protein 50) (Gu-beta) (Nucleolar protein Gu2)		46	Q9BQ39	4	4.5	7	4.5	4.5	3.5	0	7	3.5	0	0	0	0	0	0	0	0	0	3	0	0	0	0	0	0	0	0	3	0	0	0	0	0	0	0	0	0	0
P11308	ERG	1	2.5	0.068202		RT23	Q9Y3D9	28S ribosomal protein S23, mitochondrial (MRP-S23) (S23mt) (Mitochondrial small ribosomal subunit protein mS23)		47	Q9Y3D9	8.5	4	6	3	4	0	0	7	4	4.5	4.5	3.5	3.5	0	3.75	4	0	3	2.5	0	0	3.5	0	0	0	2.25	0	0	2.5	0	3	0	0	0	0	0	0	0
P56693	SOX10	1	2.5	0.068202		RT29	P51398	28S ribosomal protein S29, mitochondrial (MRP-S29) (S29mt) (Death-associated protein 3) (DAP-3) (Ionizing radiation resistance conferring protein) (Mitochondrial small ribosomal subunit protein mS29)	FUNCTION: Involved in mediating interferon-gamma-induced cell death.	48	P51398	12	4	7	5	5	0	0	4.5	0	0	0	0	0	16	0	0	0	0	0	25.5	0	0	23.5	0	0	0	0	0	0	0	0	0	0	0	0	0	0	0
Q00978	IRF9	1	2.5	0.068202		DHX30	Q7L2E3	ATP-dependent RNA helicase DHX30 (EC 3.6.4.13) (DEAH box protein 30)	FUNCTION: RNA-dependent helicase (PubMed:29100085). Plays an important role in the assembly of the mitochondrial large ribosomal subunit (PubMed:25683715, PubMed:29100085). Required for optimal function of the zinc-finger antiviral protein ZC3HAV1 (By similarity). Associates with mitochondrial DNA (PubMed:18063578). Involved in nervous system development and differentiation through its involvemen…	49	Q7L2E3	14	8	14	6.5	11	0	0	5.5	0	0	0	0	0	0	0	0	0	0	0	0	0	0	0	0	0	0	0	0	0	0	0	0	0	0	0	0	0	0
Q06710	PAX8	1	2.5	0.068202		RM11	Q9Y3B7	39S ribosomal protein L11, mitochondrial (L11mt) (MRP-L11) (Mitochondrial large ribosomal subunit protein uL11m)		50	Q9Y3B7	6.5	5	0	3.5	3	0	0	3.5	8	16	11	0	11	0	12	0	8	10.5	7	0	0	7.5	0	0	0	0	10	0	0	7.5	0	0	0	0	8.5	0	0	0
Q16650	TBR1	1	2.5	0.068202		TOP1	P11387	DNA topoisomerase 1 (EC 5.99.1.2) (DNA topoisomerase I)	FUNCTION: Releases the supercoiling and torsional tension of DNA introduced during the DNA replication and transcription by transiently cleaving and rejoining one strand of the DNA duplex. Introduces a single-strand break via transesterification at a target site in duplex DNA. The scissile phosphodiester is attacked by the catalytic tyrosine of the enzyme, resulting in the formation of a DNA-(3'-…	51	P11387	7	7.5	4.5	8.5	0	0	0	4.5	9.5	13.5	7.5	7	9	0	11.25	9	7	6.5	0	0	0	0	0	0	0	0	0	0	0	0	0	0	0	0	0	0	0	0
Q9UPM6	LHX6	1	2.5	0.068202		EBP2	Q99848	Probable rRNA-processing protein EBP2 (EBNA1-binding protein 2) (Nucleolar protein p40)	FUNCTION: Required for the processing of the 27S pre-rRNA. {ECO:0000250}.	52	Q99848	9	11.5	0	8.5	8.5	0	0	0	7	7.5	0	0	8	0	7.25	0	0	0	0	0	0	0	0	0	0	0	0	0	0	0	0	0	0	0	0	0	0	0
P40763	STAT3	1	2.33	0.0635643		STAU1	O95793	Double-stranded RNA-binding protein Staufen homolog 1	FUNCTION: Binds double-stranded RNA (regardless of the sequence) and tubulin. May play a role in specific positioning of mRNAs at given sites in the cell by cross-linking cytoskeletal and RNA components, and in stimulating their translation at the site.	53	O95793	8.5	4.5	4.5	6.5	0	5	6.5	6.5	0	0	0	0	0	0	0	0	0	0	0	0	0	0	0	0	0	0	0	0	0	0	0	0	0	0	0	0	0	0
Q15723	ELF2	1	2	0.0545616		DDX24	Q9GZR7	ATP-dependent RNA helicase DDX24 (EC 3.6.4.13) (DEAD box protein 24)	FUNCTION: ATP-dependent RNA helicase. {ECO:0000305}.	54	Q9GZR7	13.5	16	11.5	15	9.5	16	6.5	11	0	0	0	4	0	4.5	0	0	0	0	0	4.5	0	2.5	7	0	0	0	0	4	0	0	3	0	0	0	0	0	0	0
P23759	PAX7	1	2	0.0545616		DDX27	Q96GQ7	Probable ATP-dependent RNA helicase DDX27 (EC 3.6.4.13) (DEAD box protein 27)	FUNCTION: Probable ATP-dependent RNA helicase. Component of the nucleolar ribosomal RNA (rRNA) processing machinery that regulates 3' end formation of ribosomal 47S rRNA (PubMed:25825154). {ECO:0000269|PubMed:25825154}.	55	Q96GQ7	7	4	2	7.5	0	7	2.5	2	0	0	0	0	0	4	0	0	0	0	0	3.5	5.5	0	0	0	0	0	0	0	0	0	0	0	0	0	0	0	0	0
Q9Y603	ETV7	1	2	0.0545616		NOG1	Q9BZE4	Nucleolar GTP-binding protein 1 (Chronic renal failure gene protein) (GTP-binding protein NGB)	FUNCTION: Involved in the biogenesis of the 60S ribosomal subunit. {ECO:0000250}.	56	Q9BZE4	11.5	15	0	17	13	12	10.5	0	0	8.5	0	0	0	0	0	0	6.5	0	0	0	0	0	0	0	0	0	0	0	0	0	0	0	0	0	0	0	0	0
						NAT10	Q9H0A0	RNA cytidine acetyltransferase (EC 2.3.1.-) (18S rRNA cytosine acetyltransferase) (N-acetyltransferase 10)	FUNCTION: RNA cytidine acetyltransferase with specificity toward both 18S rRNA and tRNAs (PubMed:25411247, PubMed:25653167). Catalyzes the formation of N(4)-acetylcytidine (ac4C) at position 1842 in 18S rRNA (PubMed:25411247). May also catalyze the formation of ac4C at position 1337 in 18S rRNA (By similarity). Required for early nucleolar cleavages of precursor rRNA at sites A0, A1 and A2 during…	57	Q9H0A0	7.5	6.5	11.5	8.5	7.5	14	0	0	8.5	6.5	7.5	5.5	10.5	0	6.75	0	0	0	11	0	0	0	5	6	0	5.5	0	0	0	0	0	0	0	0	0	0	0	0
						KRI1	Q8N9T8	Protein KRI1 homolog		58	Q8N9T8	0	4	5	3	0	4	0	3.5	6.5	0	3.5	0	2.5	0	3	0	0	0	0	0	0	3.5	0	0	0	0	0	0	0	0	0	0	0	0	0	0	0	0
						SPB1	Q8IY81	pre-rRNA processing protein FTSJ3 (EC 2.1.1.-) (2'-O-ribose RNA methyltransferase SPB1 homolog) (Protein ftsJ homolog 3) (Putative rRNA methyltransferase 3)	FUNCTION: Probable methyltransferase involved in the processing of the 34S pre-rRNA to 18S rRNA and in 40S ribosomal subunit formation. {ECO:0000255|HAMAP-Rule:MF_03163, ECO:0000269|PubMed:22195017}.	59	Q8IY81	0	12	9	12	10.5	17	10	8.5	2.5	4.5	5	0	0	0	4.75	4.5	3.5	0	0	0	0	0	0	0	0	0	0	0	0	0	0	0	0	0	0	0	0	0
						NOP53	Q9NZM5	Ribosome biogenesis protein NOP53 (Glioma tumor suppressor candidate region gene 2 protein) (Protein interacting with carboxyl terminus 1) (PICT-1) (p60)	FUNCTION: Nucleolar protein which is involved in the integration of the 5S RNP into the ribosomal large subunit during ribosome biogenesis (PubMed:24120868). In ribosome biogenesis, may also play a role in rRNA transcription (PubMed:27729611). Also functions as a nucleolar sensor that regulates the activation of p53/TP53 in response to ribosome biogenesis perturbation, DNA damage and other stress…	60	Q9NZM5	0	5.5	3.5	2.5	4	5.5	3.5	2.5	0	10.5	0	0	11	15	0	0	11.5	0	9.5	0	0	0	0	0	0	0	0	0	0	0	0	0	0	0	0	0	0	0
						RBM34	P42696	RNA-binding protein 34 (RNA-binding motif protein 34)		61	P42696	0	11.5	6	8	4	5.5	5.5	6	0	0	0	0	0	0	0	0	0	0	0	0	0	0	0	0	0	0	0	0	0	0	0	0	0	0	0	0	0	0
						RBM28	Q9NW13	RNA-binding protein 28 (RNA-binding motif protein 28)	FUNCTION: Nucleolar component of the spliceosomal ribonucleoprotein complexes. {ECO:0000269|PubMed:17081119}.	62	Q9NW13	0	14	9.5	17.5	7.5	8.5	5	8.5	0	0	0	0	0	0	0	0	0	0	0	0	0	0	0	0	0	0	0	0	0	0	0	0	0	0	0	0	0	0
						CG050	Q9BRJ6	Uncharacterized protein C7orf50		63	Q9BRJ6	3	3	4	5	0	4	2.5	4	2.5	2.5	2.5	4.5	2.5	0	0	0	0	2.5	3.5	0	0	0	0	2.5	0	0	0	0	2.5	0	0	0	0	0	0	0	0	0
						PWP1	Q13610	Periodic tryptophan protein 1 homolog (Keratinocyte protein IEF SSP 9502)	FUNCTION: Chromatin-associated factor that regulates transcription (PubMed:29065309). Regulates Pol I-mediated rRNA biogenesis and, probably, Pol III-mediated transcription (PubMed:29065309). Regulates the epigenetic status of rDNA (PubMed:29065309). {ECO:0000269|PubMed:29065309}.	64	Q13610	3.5	8.5	3	5.5	4.5	3.5	5.5	0	2.5	0	0	2.5	0	0	0	0	0	0	0	0	0	0	0	0	0	0	0	0	0	0	0	0	0	0	0	0	0	0
						ZN512	Q96ME7	Zinc finger protein 512	FUNCTION: May be involved in transcriptional regulation.	65	Q96ME7	8	12	9	14.5	8.5	14	10.5	0	0	0	0	0	0	0	0	0	0	0	0	0	0	0	0	0	0	0	0	0	0	0	0	0	0	0	0	0	0	0
[truncated: 18 more columns]

## Sheet: C7
Baits in cluster 7						Preys in cluster 7					PSM average per bait
Uniprot	Bait	Frequency	PSM sum in cluster	% of PSMs		Name	Uniprot	Protein names	Function (Uniprot)	order in cluster		KLF16	KLF8	LHX2	SOX2	ETV3	KLF9	LHX1	FEV	ELF2	HNF4A
Q9BXK1	KLF16	14	181	75.8115		ZN724	A8MTY0	Zinc finger protein 724	FUNCTION: May be involved in transcriptional regulation. {ECO:0000250}.	1	A8MTY0	5	0	6	0	0	0	5	0	0	0
O95600	KLF8	3	11	4.60733		BAZ1B	Q9UIG0	Tyrosine-protein kinase BAZ1B (EC 2.7.10.2) (Bromodomain adjacent to zinc finger domain protein 1B) (Williams syndrome transcription factor) (Williams-Beuren syndrome chromosomal region 10 protein) (Williams-Beuren syndrome chromosomal region 9 protein) (hWALp2)	FUNCTION: Atypical tyrosine-protein kinase that plays a central role in chromatin remodeling and acts as a transcription regulator. Involved in DNA damage response by phosphorylating 'Tyr-142' of histone H2AX (H2AXY142ph). H2AXY142ph plays a central role in DNA repair and acts as a mark that distinguishes between apoptotic and repair responses to genotoxic stress. Essential component of the WICH …	2	Q9UIG0	11.5	4.5	7	3	5.5	0	0	0	0	0
P50458	LHX2	2	13	5.44503		DEAF1	O75398	Deformed epidermal autoregulatory factor 1 homolog (Nuclear DEAF-1-related transcriptional regulator) (NUDR) (Suppressin) (Zinc finger MYND domain-containing protein 5)	FUNCTION: Transcription factor that binds to sequence with multiple copies of 5'-TTC[CG]G-3' present in its own promoter and that of the HNRPA2B1 gene. Down-regulates transcription of these genes. Binds to the retinoic acid response element (RARE) 5'-AGGGTTCACCGAAAGTTCA-3'. Activates the proenkephalin gene independently of promoter binding, probably through protein-protein interaction. When secre…	3	O75398	7	4	0	0	0	0	0	0	0	0
P41162	ETV3	1	5.5	2.30366		UBF1	P17480	Nucleolar transcription factor 1 (Autoantigen NOR-90) (Upstream-binding factor 1) (UBF-1)	FUNCTION: Recognizes the ribosomal RNA gene promoter and activates transcription mediated by RNA polymerase I through cooperative interactions with the transcription factor SL1/TIF-IB complex. It binds specifically to the upstream control element. {ECO:0000269|PubMed:28777933, ECO:0000269|PubMed:7982918}.	4	P17480	6	2.5	0	0	0	0	0	0	0	0
P41235	HNF4A	1	3.25	1.36126		ZN770	Q6IQ21	Zinc finger protein 770	FUNCTION: May be involved in transcriptional regulation.	5	Q6IQ21	4	0	0	0	0	0	0	0	0	0
P48431	SOX2	1	3	1.25654		TPX2	Q9ULW0	Targeting protein for Xklp2 (Differentially expressed in cancerous and non-cancerous lung cells 2) (DIL-2) (Hepatocellular carcinoma-associated antigen 519) (Hepatocellular carcinoma-associated antigen 90) (Protein fls353) (Restricted expression proliferation-associated protein 100) (p100)	FUNCTION: Spindle assembly factor required for normal assembly of mitotic spindles. Required for normal assembly of microtubules during apoptosis. Required for chromatin and/or kinetochore dependent microtubule nucleation. Mediates AURKA localization to spindle microtubules (PubMed:18663142, PubMed:19208764). Activates AURKA by promoting its autophosphorylation at 'Thr-288' and protects this resi…	6	Q9ULW0	38.5	0	0	0	0	0	0	0	0	0
P48742	LHX1	1	5	2.09424		KIF23	Q02241	Kinesin-like protein KIF23 (Kinesin-like protein 5) (Mitotic kinesin-like protein 1)	FUNCTION: Component of the centralspindlin complex that serves as a microtubule-dependent and Rho-mediated signaling required for the myosin contractile ring formation during the cell cycle cytokinesis. Essential for cytokinesis in Rho-mediated signaling. Required for the localization of ECT2 to the central spindle. Plus-end-directed motor enzyme that moves antiparallel microtubules in vitro. {EC…	7	Q02241	13	0	0	0	0	0	0	0	0	0
Q13886	KLF9	1	2.5	1.04712		SNW1	Q13573	SNW domain-containing protein 1 (Nuclear protein SkiP) (Nuclear receptor coactivator NCoA-62) (Ski-interacting protein)	FUNCTION: Involved in pre-mRNA splicing as component of the spliceosome (PubMed:11991638, PubMed:28502770, PubMed:28076346). Is required in the specific splicing of CDKN1A pre-mRNA; the function probably involves the recruitment of U2AF2 to the mRNA. Is proposed to recruit PPIL1 to the spliceosome. May be involved in cyclin-D1/CCND1 mRNA stability through the SNARP complex which associates with b…	8	Q13573	8	0	0	0	0	0	0	0	0	0
Q15723	ELF2	1	8.5	3.56021		KLF16	Q9BXK1	Krueppel-like factor 16 (Basic transcription element-binding protein 4) (BTE-binding protein 4) (Novel Sp1-like zinc finger transcription factor 2) (Transcription factor BTEB4) (Transcription factor NSLP2)	FUNCTION: Transcription factor that binds GC and GT boxes and displaces Sp1 and Sp3 from these sequences. Modulates dopaminergic transmission in the brain (By similarity). {ECO:0000250}.	9	Q9BXK1	37.5	0	0	0	0	0	0	0	8.5	0
Q99581	FEV	1	6	2.51309		H1X	Q92522	Histone H1x	FUNCTION: Histones H1 are necessary for the condensation of nucleosome chains into higher-order structures.	10	Q92522	10.5	0	0	0	0	0	0	0	0	0
						MFAP1	P55081	Microfibrillar-associated protein 1 (Spliceosome B complex protein MFAP1)	FUNCTION: Involved in pre-mRNA splicing as a component of the spliceosome. {ECO:0000269|PubMed:28781166}.	11	P55081	6.5	0	0	0	0	0	0	6	0	3.25
						SLU7	O95391	Pre-mRNA-splicing factor SLU7 (hSlu7)	FUNCTION: Participates in the second catalytic step of pre-mRNA splicing, when the free hydroxyl group of exon I attacks the 3'-splice site to generate spliced mRNA and the excised lariat intron. Required for holding exon 1 properly in the spliceosome and for correct AG identification when more than one possible AG exists in 3'-splicing site region. May be involved in the activation of proximal A…	12	O95391	10.5	0	0	0	0	0	0	0	0	0
						ZKSC3	Q9BRR0	Zinc finger protein with KRAB and SCAN domains 3 (Zinc finger and SCAN domain-containing protein 13) (Zinc finger protein 306) (Zinc finger protein 309) (Zinc finger protein 47 homolog) (Zf47) (Zfp-47)	FUNCTION: Transcriptional factor that binds to the consensus sequence 5'-[GT][AG][AGT]GGGG-3' and acts as a repressor of autophagy. Specifically represses expression of genes involved in autophagy and lysosome biogenesis/function such as MAP1LC3B, ULK1 or WIPI2. Associates with chromatin at the ITGB4 and VEGF promoters. Also acts as a transcription activator and promotes cancer cell progression a…	13	Q9BRR0	15.5	0	0	0	0	2.5	0	0	0	0
						ZN507	Q8TCN5	Zinc finger protein 507	FUNCTION: May be involved in transcriptional regulation.	14	Q8TCN5	7.5	0	0	0	0	0	0	0	0	0

## Sheet: C8
Baits in cluster 8						Preys in cluster 8					PSM average per bait
Uniprot	Bait	Frequency	PSM sum in cluster	% of PSMs		Name	Uniprot	Protein names	Function (Uniprot)	order in cluster		KLF9	KLF16	ELF2	HNF1B	KLF8	ETV3	ELK3	ELF1	SOX2	FEV	TLX3	SP7	KLF3	KLF5	SOX17	SOX6	MYB	PAX7	NFYC	T/BRAC	KLF10
Q13886	KLF9	14	189.5	49.3169		ATAD5	Q96QE3	ATPase family AAA domain-containing protein 5 (Chromosome fragility-associated gene 1 protein)	FUNCTION: Involved in DNA damage response. Involved in a RAD9A-related damage checkpoint, a pathway that is important in determining whether DNA damage is compatible with cell survival or whether it requires cell elimination by apoptosis. Modulates the RAD9A interaction with BCL2 and thereby induces DNA damages-induced apoptosis. {ECO:0000269|PubMed:15983387}.	1	Q96QE3	3	6	0	0	0	3.5	0	0	2.5	0	0	0	0	0	0	0	0	0	0	0	0
Q9BXK1	KLF16	10	61.5	16.0052		DDX10	Q13206	Probable ATP-dependent RNA helicase DDX10 (EC 3.6.4.13) (DEAD box protein 10)	FUNCTION: Putative ATP-dependent RNA helicase.	2	Q13206	11	12	0	0	0	10.5	0	0	0	0	0	0	0	0	0	0	0	0	0	0	0
Q15723	ELF2	5	27.5	7.1568		NUSAP	Q9BXS6	Nucleolar and spindle-associated protein 1 (NuSAP)	FUNCTION: Microtubule-associated protein with the capacity to bundle and stabilize microtubules (By similarity). May associate with chromosomes and promote the organization of mitotic spindle microtubules around them. {ECO:0000250, ECO:0000269|PubMed:12963707}.	3	Q9BXS6	3	5.5	0	0	0	0	0	0	0	0	0	0	0	0	0	0	0	0	0	0	0
P35680	HNF1B	3	11.75	3.05791		BBX	Q8WY36	HMG box transcription factor BBX (Bobby sox homolog) (HMG box-containing protein 2)	FUNCTION: Transcription factor that is necessary for cell cycle progression from G1 to S phase. {ECO:0000269|PubMed:11680820}.	4	Q8WY36	6	6.5	0	0	0	0	0	0	0	0	0	0	0	0	0	0	0	0	0	0	0
O95600	KLF8	2	9.5	2.47235		RL36A	P83881	60S ribosomal protein L36a (60S ribosomal protein L44) (Cell growth-inhibiting gene 15 protein) (Cell migration-inducing gene 6 protein) (Large ribosomal subunit protein eL42)		5	P83881	5	4	0	0	0	0	0	0	0	0	0	0	0	6	0	0	0	0	0	0	0
P32519	ELF1	2	5.5	1.43136		NPAT	Q14207	Protein NPAT (Nuclear protein of the ataxia telangiectasia mutated locus) (Nuclear protein of the ATM locus) (p220)	FUNCTION: Required for progression through the G1 and S phases of the cell cycle and for S phase entry. Activates transcription of the histone H2A, histone H2B, histone H3 and histone H4 genes in conjunction with MIZF. Also positively regulates the ATM, MIZF and PRKDC promoters. Transcriptional activation may be accomplished at least in part by the recruitment of the NuA4 histone acetyltransferas…	6	Q14207	33.5	8.5	0	0	0	0	0	0	0	0	0	0	0	0	0	0	0	0	0	0	0
P41162	ETV3	2	14	3.64346		GON4L	Q3T8J9	GON-4-like protein (GON-4 homolog)	FUNCTION: Has transcriptional repressor activity, probably as part of a complex with YY1, SIN3A AND HDAC1. Required for B cell lymphopoiesis. {ECO:0000250|UniProtKB:Q9DB00}.	7	Q3T8J9	59	5	0	0	0	0	0	0	0	0	0	0	0	0	0	0	0	0	4	0	0
P41970	ELK3	2	6	1.56148		S18L2	Q9UHA2	SS18-like protein 2 (SYT homolog 2)		8	Q9UHA2	4.5	0	0	0	0	0	0	0	0	0	0	0	0	0	0	0	0	0	0	0	0
O15178	T/BRAC	1	2.5	0.650618		KLF9	Q13886	Krueppel-like factor 9 (Basic transcription element-binding protein 1) (BTE-binding protein 1) (GC-box-binding protein 1) (Transcription factor BTEB1)	FUNCTION: Transcription factor that binds to GC box promoter elements. Selectively activates mRNA synthesis from genes containing tandem repeats of GC boxes but represses genes with a single GC box. Acts as an epidermal circadian transcription factor regulating keratinocyte proliferation (PubMed:22711835). {ECO:0000269|PubMed:22711835}.	9	Q13886	17	0	0	0	0	0	0	0	0	0	0	0	0	0	0	0	0	0	0	0	0
O43711	TLX3	1	5	1.30124		ARI4A	P29374	AT-rich interactive domain-containing protein 4A (ARID domain-containing protein 4A) (Retinoblastoma-binding protein 1) (RBBP-1)	FUNCTION: DNA-binding protein which modulates activity of several transcription factors including RB1 (retinoblastoma-associated protein) and AR (androgen receptor) (By similarity). May function as part of an mSin3A repressor complex (PubMed:14581478). Has no intrinsic transcriptional activity (By similarity). Plays a role in the regulation of epigenetic modifications at the PWS/AS imprinting cen…	10	P29374	13.5	0	7.5	0	0	0	0	0	0	0	0	0	0	0	0	0	0	0	0	0	0
P10242	MYB	1	2.5	0.650618		PHF8	Q9UPP1	Histone lysine demethylase PHF8 (EC 1.14.11.27) (PHD finger protein 8)	FUNCTION: Histone lysine demethylase with selectivity for the di- and monomethyl states that plays a key role cell cycle progression, rDNA transcription and brain development. Demethylates mono- and dimethylated histone H3 'Lys-9' residue (H3K9Me1 and H3K9Me2), dimethylated H3 'Lys-27' (H3K27Me2) and monomethylated histone H4 'Lys-20' residue (H4K20Me1). Acts as a transcription activator as H3K9M…	11	Q9UPP1	4.5	0	2	0	0	0	4	0	0	0	0	0	0	0	0	0	2.5	0	0	0	0
P23759	PAX7	1	6	1.56148		BRMS1	Q9HCU9	Breast cancer metastasis-suppressor 1	FUNCTION: Transcriptional repressor. Down-regulates transcription activation by NF-kappa-B by promoting the deacetylation of RELA at 'Lys-310'. Promotes HDAC1 binding to promoter regions. Down-regulates expression of anti-apoptotic genes that are controlled by NF-kappa-B. Promotes apoptosis in cells that have inadequate adherence to a substrate, a process called anoikis, and may thereby inhibit m…	12	Q9HCU9	6	2.5	6	2.5	0	0	0	2.5	0	0	0	0	0	0	0	0	0	0	0	0	0
P35712	SOX6	1	2.5	0.650618		ING2	Q9H160	Inhibitor of growth protein 2 (Inhibitor of growth 1-like protein) (ING1Lp) (p32) (p33ING2)	FUNCTION: Seems to be involved in p53/TP53 activation and p53/TP53-dependent apoptotic pathways, probably by enhancing acetylation of p53/TP53. Component of a mSin3A-like corepressor complex, which is probably involved in deacetylation of nucleosomal histones. ING2 activity seems to be modulated by binding to phosphoinositides (PtdInsPs). {ECO:0000269|PubMed:11481424, ECO:0000269|PubMed:12859901}.	13	Q9H160	8	3	3.5	2.25	3	0	2	3	0	0	0	0	2.5	0	0	2.5	0	0	0	2.5	0
P48431	SOX2	1	2.5	0.650618		SDS3	Q9H7L9	Sin3 histone deacetylase corepressor complex component SDS3 (45 kDa Sin3-associated polypeptide) (Suppressor of defective silencing 3 protein homolog)	FUNCTION: Regulatory protein which represses transcription and augments histone deacetylase activity of HDAC1. May have a potential role in tumor suppressor pathways through regulation of apoptosis. May function in the assembly and/or enzymatic activity of the mSin3A corepressor complex or in mediating interactions between the complex and other regulatory complexes. {ECO:0000269|PubMed:12724404, …	14	Q9H7L9	15.5	8.5	8.5	7	6.5	0	0	0	0	5.5	5	7.5	0	0	5	0	0	6	0	0	7.5
P57682	KLF3	1	2.5	0.650618
Q13118	KLF10	1	7.5	1.95185
Q13887	KLF5	1	6	1.56148
Q13952	NFYC	1	4	1.04099
Q8TDD2	SP7	1	7.5	1.95185
Q99581	FEV	1	5.5	1.43136
Q9H6I2	SOX17	1	5	1.30124

## Sheet: C9
Baits in cluster 9						Preys in cluster 9					PSM average per bait
Uniprot	Bait	Frequency	PSM sum in cluster	% of PSMs		Name	Uniprot	Protein names	Function (Uniprot)	order in cluster		NHLH1	LHX2	SOX2	TLX2	KLF3	KLF16	ETV3	SPZ1	SOX15	MYB	LHX1	NFYC	KLF5	KLF9	KLF12	KLF15	EN1	MYOD1	GATA1	KLF6	PAX6	E2F1	KLF8	MYC	NFATC4	TLX3
Q02575	NHLH1	24	340.5	47.9577		NOP16	Q9Y3C1	Nucleolar protein 16 (HBV pre-S2 trans-regulated protein 3)		1	Q9Y3C1	3	2	0	0	0	4.5	0	0	0	2.5	2	0	4	4.5	2.5	3	0	0	0	5	0	2.5	2.5	2	2	2
P50458	LHX2	7	62	8.73239		GPTC4	Q5T3I0	G patch domain-containing protein 4		2	Q5T3I0	5.25	0	0	0	0	4.5	0	0	0	4	0	0	0	4	0	0	0	0	0	0	0	0	0	0	0	0
P48431	SOX2	3	38.5	5.42254		NOG2	Q13823	Nucleolar GTP-binding protein 2 (Autoantigen NGP-1)	FUNCTION: GTPase that associates with pre-60S ribosomal subunits in the nucleolus and is required for their nuclear export and maturation (By similarity). May promote cell proliferation possibly by increasing p53/TP53 protein levels, and consequently those of its downstream product CDKN1A/p21, and decreasing RPL23A protein levels (PubMed:26203195). {ECO:0000250, ECO:0000269|PubMed:26203195}.	3	Q13823	16.25	16	0	0	0	14	18	0	0	0	0	0	0	0	0	0	0	0	0	0	0	0	0	0	0	0
O43763	TLX2	3	34.5	4.85915		DDX31	Q9H8H2	Probable ATP-dependent RNA helicase DDX31 (EC 3.6.4.13) (DEAD box protein 31) (Helicain)	FUNCTION: Probable ATP-dependent RNA helicase (By similarity). Plays a role in ribosome biogenesis and TP53/p53 regulation through its interaction with NPM1 (PubMed:23019224). {ECO:0000250, ECO:0000269|PubMed:23019224}.	4	Q9H8H2	5.25	5	0	0	0	3	5	0	0	0	4	0	0	0	2	0	0	0	0	0	0	0	0	0	0	0
P57682	KLF3	2	32.5	4.57746		REXO4	Q9GZR2	RNA exonuclease 4 (EC 3.1.-.-) (Exonuclease XPMC2) (Prevents mitotic catastrophe 2 protein homolog) (hPMC2)		5	Q9GZR2	4	3	4.5	0	0	0	2.5	0	0	0	2.5	0	0	0	2.5	0	0	0	0	0	3	0	0	0	0	0
Q9BXK1	KLF16	4	26	3.66197		RRP1B	Q14684	Ribosomal RNA processing protein 1 homolog B (RRP1-like protein B)	FUNCTION: Positively regulates DNA damage-induced apoptosis by acting as a transcriptional coactivator of proapoptotic target genes of the transcriptional activator E2F1 (PubMed:20040599). Likely to play a role in ribosome biogenesis by targeting serine/threonine protein phosphatase PP1 to the nucleolus (PubMed:20926688). Involved in regulation of mRNA splicing (By similarity). Inhibits SIPA1 GTP…	6	Q14684	16.25	16	16	12.5	0	0	0	0	15	0	0	0	0	0	0	0	0	0	0	0	0	0	0	0	0	0
P41162	ETV3	3	25.5	3.59155		NOP2	P46087	Probable 28S rRNA (cytosine(4447)-C(5))-methyltransferase (EC 2.1.1.-) (Nucleolar protein 1) (Nucleolar protein 2 homolog) (Proliferating-cell nucleolar antigen p120) (Proliferation-associated nucleolar protein p120)	FUNCTION: Involved in ribosomal large subunit assembly (PubMed:24120868). S-adenosyl-L-methionine-dependent methyltransferase that specifically methylates the C(5) position of cytosine 4447 in 28S rRNA (Probable). May play a role in the regulation of the cell cycle and the increased nucleolar activity that is associated with the cell proliferation (Probable). {ECO:0000269|PubMed:24120868, ECO:000…	7	P46087	18	16	18	15.5	0	0	0	0	0	0	0	0	0	0	0	0	0	0	0	0	0	0	0	0	0	0
Q9BXG8	SPZ1	2	17	2.39437		SURF6	O75683	Surfeit locus protein 6	FUNCTION: Binds to both DNA and RNA in vitro, with a stronger binding capacity for RNA. May represent a nucleolar constitutive protein involved in ribosomal biosynthesis or assembly (By similarity). {ECO:0000250}.	8	O75683	4.75	4	0	6.5	0	0	0	0	0	0	0	0	0	0	0	0	0	0	0	0	0	0	0	0	0	0
O60248	SOX15	1	15	2.11268		LLPH	Q9BRT6	Protein LLP homolog (Protein LAPS18-like)	FUNCTION: In hippocampal neurons, regulates dendritic and spine growth and synaptic transmission. {ECO:0000250|UniProtKB:Q9D945}.	9	Q9BRT6	2.75	0	0	0	0	0	0	0	0	0	0	0	0	0	2.5	0	0	0	0	0	0	0	0	0	0	0
P10242	MYB	3	14.5	2.04225		H14	P10412	Histone H1.4 (Histone H1b) (Histone H1s-4)	FUNCTION: Histone H1 protein binds to linker DNA between nucleosomes forming the macromolecular structure known as the chromatin fiber. Histones H1 are necessary for the condensation of nucleosome chains into higher-order structured fibers. Acts also as a regulator of individual gene transcription through chromatin remodeling, nucleosome spacing and DNA methylation (By similarity). {ECO:0000250}.	10	P10412	18.5	0	0	0	26.5	0	0	0	0	0	0	11.5	0	0	0	0	0	0	0	0	0	0	0	0	0	0
P48742	LHX1	4	11.5	1.61972		RL36L	Q969Q0	60S ribosomal protein L36a-like (Large ribosomal subunit protein eL42-like)		11	Q969Q0	4.5	0	0	0	6	0	0	0	0	0	0	0	0	0	0	6.5	0	0	0	0	0	0	0	0	0	0
Q13952	NFYC	1	11.5	1.61972		RL37A	P61513	60S ribosomal protein L37a (Large ribosomal subunit protein eL43)		12	P61513	9.75	0	0	0	0	0	0	0	0	8	0	0	0	0	0	0	7.5	0	0	0	0	0	0	0	0	0
Q13887	KLF5	2	11	1.5493		UBE2O	Q9C0C9	(E3-independent) E2 ubiquitin-conjugating enzyme (EC 2.3.2.24) (E2/E3 hybrid ubiquitin-protein ligase UBE2O) (Ubiquitin carrier protein O) (Ubiquitin-conjugating enzyme E2 O) (Ubiquitin-conjugating enzyme E2 of 230 kDa) (Ubiquitin-conjugating enzyme E2-230K) (Ubiquitin-protein ligase O)	FUNCTION: E2/E3 hybrid ubiquitin-protein ligase that displays both E2 and E3 ligase activities and mediates monoubiquitination of target proteins (PubMed:23455153, PubMed:24703950). Negatively regulates TRAF6-mediated NF-kappa-B activation independently of its E2 activity (PubMed:23381138). Acts as a positive regulator of BMP7 signaling by mediating monoubiquitination of SMAD6, thereby regulating…	13	Q9C0C9	30.75	0	0	0	0	0	0	10	0	0	0	0	0	0	0	0	0	7	0	0	0	0	0	0	0	0
Q13886	KLF9	3	10.5	1.47887		NP1L4	Q99733	Nucleosome assembly protein 1-like 4 (Nucleosome assembly protein 2) (NAP-2)	FUNCTION: Acts as histone chaperone in nucleosome assembly. {ECO:0000269|PubMed:9325046}.	14	Q99733	17	0	0	0	0	0	0	7	0	0	0	0	0	0	0	0	0	0	0	0	0	0	0	0	0	0
Q9Y4X4	KLF12	4	9.5	1.33803		UBXN7	O94888	UBX domain-containing protein 7	FUNCTION: Ubiquitin-binding adapter that links a subset of NEDD8-associated cullin ring ligases (CRLs) to the segregase VCP/p97, to regulate turnover of their ubiquitination substrates. {ECO:0000269|PubMed:22537386}.	15	O94888	2.5	0	0	0	0	0	0	0	0	0	0	0	0	0	0	0	0	0	0	0	0	0	0	0	0	0
Q9UIH9	KLF15	2	9.5	1.33803		CFDP1	Q9UEE9	Craniofacial development protein 1 (Bucentaur)	FUNCTION: May play a role during embryogenesis. {ECO:0000250}.	16	Q9UEE9	8	0	0	0	0	0	0	0	0	0	0	0	0	0	0	0	0	0	0	0	0	0	0	0	0	0
Q05925	EN1	1	7.5	1.05634		RAD18	Q9NS91	E3 ubiquitin-protein ligase RAD18 (EC 2.3.2.27) (Postreplication repair protein RAD18) (hHR18) (hRAD18) (RING finger protein 73) (RING-type E3 ubiquitin transferase RAD18)	FUNCTION: E3 ubiquitin-protein ligase involved in postreplication repair of UV-damaged DNA. Postreplication repair functions in gap-filling of a daughter strand on replication of damaged DNA. Associates to the E2 ubiquitin conjugating enzyme UBE2B to form the UBE2B-RAD18 ubiquitin ligase complex involved in mono-ubiquitination of DNA-associated PCNA on 'Lys-164'. Has ssDNA binding activity. {ECO:…	17	Q9NS91	14.5	0	0	0	0	0	0	0	0	0	0	0	0	0	0	0	0	0	0	0	0	0	0	0	0	0
P15172	MYOD1	1	7	0.985915		NPM	P06748	Nucleophosmin (NPM) (Nucleolar phosphoprotein B23) (Nucleolar protein NO38) (Numatrin)	FUNCTION: Involved in diverse cellular processes such as ribosome biogenesis, centrosome duplication, protein chaperoning, histone assembly, cell proliferation, and regulation of tumor suppressors p53/TP53 and ARF. Binds ribosome presumably to drive ribosome nuclear export. Associated with nucleolar ribonucleoprotein structures and bind single-stranded nucleic acids. Acts as a chaperonin for the …	18	P06748	73.25	0	0	0	0	0	0	0	0	0	0	0	0	0	0	0	0	0	0	0	0	0	0	0	0	0
P15976	GATA1	1	7	0.985915		HEN1	Q02575	Helix-loop-helix protein 1 (HEN-1) (Class A basic helix-loop-helix protein 35) (bHLHa35) (Nescient helix loop helix 1) (NSCL-1)	FUNCTION: May serve as DNA-binding protein and may be involved in the control of cell-type determination, possibly within the developing nervous system.	19	Q02575	17.75	0	0	0	0	0	0	0	0	0	0	0	0	0	0	0	0	0	0	0	0	0	0	0	0	0
Q99612	KLF6	1	5	0.704225		NP1L1	P55209	Nucleosome assembly protein 1-like 1 (NAP-1-related protein) (hNRP)	FUNCTION: Plays a key role in the regulation of embryonic neurogenesis (By similarity). Promotes the proliferation of neural progenitors and inhibits neuronal differentiation during cortical development (By similarity). Regulates neurogenesis via the modulation of RASSF10; regulates RASSF10 expression by promoting SETD1A-mediated H3K4 methylation at the RASSF10 promoter (By similarity). {ECO:0000…	20	P55209	35	0	0	0	0	0	0	0	0	0	0	0	0	0	0	0	0	0	0	0	0	0	0	0	0	0
P26367	PAX6	1	3	0.422535		NPM3	O75607	Nucleoplasmin-3	FUNCTION: May act as a chaperone.	21	O75607	8.25	0	0	0	0	0	0	0	0	0	0	0	0	0	0	0	0	0	0	0	0	0	0	0	0	0
Q01094	E2F1	1	2.5	0.352113		RLA1	P05386	60S acidic ribosomal protein P1 (Large ribosomal subunit protein P1)	FUNCTION: Plays an important role in the elongation step of protein synthesis.	22	P05386	13.5	0	0	0	0	0	0	0	0	0	0	0	0	0	0	0	0	0	0	0	0	0	0	0	0	0
O95600	KLF8	1	2.5	0.352113		BMS1	Q14692	Ribosome biogenesis protein BMS1 homolog (Ribosome assembly protein BMS1 homolog)	FUNCTION: May act as a molecular switch during maturation of the 40S ribosomal subunit in the nucleolus. {ECO:0000250|UniProtKB:Q08965}.	23	Q14692	3.5	0	0	0	0	0	0	0	0	0	3	0	0	2	0	0	0	0	0	0	0	0	0	0	0	0
P01106	MYC	1	2	0.28169		NKRF	O15226	NF-kappa-B-repressing factor (NFkB-repressing factor) (Protein ITBA4) (Transcription factor NRF)	FUNCTION: Interacts with a specific negative regulatory element (NRE) 5'-AATTCCTCTGA-3' to mediate transcriptional repression of certain NK-kappa-B responsive genes. Involved in the constitutive silencing of the interferon beta promoter, independently of the virus-induced signals, and in the inhibition of the basal and cytokine-induced iNOS promoter activity. Also involved in the regulation of IL…	24	O15226	8.25	0	0	0	0	0	0	0	0	0	0	0	7	0	0	0	0	0	7	0	0	0	0	0	0	0
Q14934	NFATC4	1	2	0.28169
O43711	TLX3	1	2	0.28169

## Sheet: C10
Baits in cluster 10						Preys in cluster 10							PSM average per bait
Uniprot	Bait	Frequency	PSM sum in cluster	% of PSMs		Name	Uniprot	Protein names	Function (Uniprot)	Order in cluster	Splicing related proteins	Other mRNA processing related proteins		GATA1	SP7	GATA3	KLF5	KLF16	FEV	SOX6	MYB	T/BRAC	SOX15	NHLH1	SOX5	SOX4	ETV4	NFATC4	PAX9	PAX6	EN1	TBR1
P15976	GATA1	28	472.5	36.4513		NKRF	O15226	NF-kappa-B-repressing factor (NFkB-repressing factor) (Protein ITBA4) (Transcription factor NRF)	FUNCTION: Interacts with a specific negative regulatory element (NRE) 5'-AATTCCTCTGA-3' to mediate transcriptional repression of certain NK-kappa-B responsive genes. Involved in the constitutive silencing of the interferon beta promoter, independently of the virus-induced signals, and in the inhibition of the basal and cytokine-induced iNOS promoter activity. Also involved in the regulation of IL…	1	x		O15226	7	0	0	7	0	0	0	0	0	0	8.25	0	0	0	0	0	0	0	0
Q8TDD2	SP7	20	376	29.0068		DHX36	Q9H2U1	ATP-dependent DNA/RNA helicase DHX36 (EC 3.6.4.12) (EC 3.6.4.13) (DEAD/H box polypeptide 36) (DEAH-box protein 36) (G4-resolvase-1) (G4R1) (MLE-like protein 1) (RNA helicase associated with AU-rich element protein)	FUNCTION: Multifunctional ATP-dependent helicase that unwinds G-quadruplex (G4) structures (PubMed:16150737, PubMed:18854321, PubMed:20472641, PubMed:21586581). Plays a role in many biological processes such as genomic integrity, gene expression regulations and as a sensor to initiate antiviral responses (PubMed:14731398, PubMed:18279852, PubMed:21993297, PubMed:22238380, PubMed:25579584). G4 str…	2		x	Q9H2U1	4.5	0	0	0	0	0	0	0	0	0	0	0	0	0	0	0	0	0	0
P23771	GATA3	20	318.5	24.5709		PSA4	P25789	Proteasome subunit alpha type-4 (EC 3.4.25.1) (Macropain subunit C9) (Multicatalytic endopeptidase complex subunit C9) (Proteasome component C9) (Proteasome subunit L)	FUNCTION: Component of the 20S core proteasome complex involved in the proteolytic degradation of most intracellular proteins. This complex plays numerous essential roles within the cell by associating with different regulatory particles. Associated with two 19S regulatory particles, forms the 26S proteasome and thus participates in the ATP-dependent degradation of ubiquitinated proteins. The 26S…	3	x		P25789	5.25	0	0	0	0	0	0	0	0	0	0	0	0	0	0	0	0	0	0
Q13887	KLF5	5	53	4.08872		CSTF1	Q05048	Cleavage stimulation factor subunit 1 (CF-1 50 kDa subunit) (Cleavage stimulation factor 50 kDa subunit) (CSTF 50 kDa subunit) (CstF-50)	FUNCTION: One of the multiple factors required for polyadenylation and 3'-end cleavage of mammalian pre-mRNAs. May be responsible for the interaction of CSTF with other factors to form a stable complex on the pre-mRNA.	4	x		Q05048	3.5	0	0	0	0	0	0	0	0	0	0	0	0	0	0	0	0	0	0
O15178	T/BRAC	1	12.75	0.983607		GATA1	P15976	Erythroid transcription factor (Eryf1) (GATA-binding factor 1) (GATA-1) (GF-1) (NF-E1 DNA-binding protein)	FUNCTION: Transcriptional activator or repressor which probably serves as a general switch factor for erythroid development. It binds to DNA sites with the consensus sequence 5'-[AT]GATA[AG]-3' within regulatory regions of globin genes and of other genes expressed in erythroid cells. Activates the transcription of genes involved in erythroid differentiation of K562 erythroleukemia cells, includin…	5	x		P15976	31.75	0	0	0	0	0	0	0	0	0	0	0	0	0	0	0	0	0	0
Q02575	NHLH1	1	8.25	0.636451		SUGP2	Q8IX01	SURP and G-patch domain-containing protein 2 (Arginine/serine-rich-splicing factor 14) (Splicing factor, arginine/serine-rich 14)	FUNCTION: May play a role in mRNA splicing. {ECO:0000305}.	6	x		Q8IX01	44.25	0	41.5	0	0	0	0	0	0	0	0	0	0	0	0	0	0	0	0
P10242	MYB	1	5.5	0.424301		PTBP1	P26599	Polypyrimidine tract-binding protein 1 (PTB) (57 kDa RNA-binding protein PPTB-1) (Heterogeneous nuclear ribonucleoprotein I) (hnRNP I)	FUNCTION: Plays a role in pre-mRNA splicing and in the regulation of alternative splicing events. Activates exon skipping of its own pre-mRNA during muscle cell differentiation. Binds to the polypyrimidine tract of introns. May promote RNA looping when bound to two separate polypyrimidine tracts in the same pre-mRNA. May promote the binding of U2 snRNP to pre-mRNA. Cooperates with RAVER1 to modul…	7	x		P26599	14.25	0	14	0	0	0	0	0	0	0	0	0	0	0	0	0	0	0	0
P35712	SOX6	1	5.5	0.424301		HNRPR	O43390	Heterogeneous nuclear ribonucleoprotein R (hnRNP R)	FUNCTION: Component of ribonucleosomes, which are complexes of at least 20 other different heterogenious nuclear ribonucleoproteins (hnRNP). hnRNP play an important role in processing of precursor mRNA in the nucleus.	8	x		O43390	19.5	0	21	0	0	0	0	0	0	0	0	0	0	0	0	0	0	0	0
P43268	ETV4	1	5	0.385728		BEND3	Q5T5X7	BEN domain-containing protein 3	FUNCTION: Transcriptional repressor which associates with the NoRC (nucleolar remodeling complex) complex and plays a key role in repressing rDNA transcription. The sumoylated form modulates the stability of the NoRC complex component BAZ2A/TIP5 by controlling its USP21-mediated deubiquitination (PubMed:21914818, PubMed:26100909). Binds to unmethylated major satellite DNA and is involved in the r…	9	x		Q5T5X7	8.5	0	9.25	0	0	0	0	0	0	0	0	0	0	0	0	0	0	0	0
Q14934	NFATC4	1	5	0.385728		AKAP8	O43823	A-kinase anchor protein 8 (AKAP-8) (A-kinase anchor protein 95 kDa) (AKAP 95)	FUNCTION: Anchoring protein that mediates the subcellular compartmentation of cAMP-dependent protein kinase (PKA type II) (PubMed:9473338). Acts as an anchor for a PKA-signaling complex onto mitotic chromosomes, which is required for maintenance of chromosomes in a condensed form throughout mitosis. Recruits condensin complex subunit NCAPD2 to chromosomes required for chromatin condensation; the …	10	x		O43823	5.75	4	9.75	0	0	0	0	0	0	0	0	0	0	0	0	0	0	0	0
P35711	SOX5	1	4.5	0.347155		EWS	Q01844	RNA-binding protein EWS (EWS oncogene) (Ewing sarcoma breakpoint region 1 protein)	FUNCTION: Might normally function as a transcriptional repressor. EWS-fusion-proteins (EFPS) may play a role in the tumorigenic process. They may disturb gene expression by mimicking, or interfering with the normal function of CTD-POLII within the transcription initiation complex. They may also contribute to an aberrant activation of the fusion protein target genes.	11	x		Q01844	4	2	2.75	0	0	0	0	0	0	0	0	0	0	0	0	0	0	0	0
Q05925	EN1	1	4.5	0.347155		RAVR1	Q8IY67	Ribonucleoprotein PTB-binding 1 (Protein raver-1)	FUNCTION: Cooperates with PTBP1 to modulate regulated alternative splicing events. Promotes exon skipping. Cooperates with PTBP1 to modulate switching between mutually exclusive exons during maturation of the TPM1 pre-mRNA (By similarity). {ECO:0000250}.	12	x		Q8IY67	14	8	8	0	0	0	0	0	0	0	0	0	0	0	0	0	0	0	0
Q06945	SOX4	1	4.5	0.347155		CPSF2	Q9P2I0	Cleavage and polyadenylation specificity factor subunit 2 (Cleavage and polyadenylation specificity factor 100 kDa subunit) (CPSF 100 kDa subunit)	FUNCTION: Component of the cleavage and polyadenylation specificity factor (CPSF) complex that play a key role in pre-mRNA 3'-end formation, recognizing the AAUAAA signal sequence and interacting with poly(A) polymerase and other factors to bring about cleavage and poly(A) addition. Involved in the histone 3' end pre-mRNA processing. {ECO:0000269|PubMed:14749727, ECO:0000269|PubMed:18688255}.	13			Q9P2I0	21.25	14.5	13.25	0	0	0	0	0	0	2	0	0	0	0	0	0	0	0	0
P26367	PAX6	1	4.25	0.327869		ZFR	Q96KR1	Zinc finger RNA-binding protein (hZFR) (M-phase phosphoprotein homolog)	FUNCTION: Involved in postimplantation and gastrulation stages of development. Involved in the nucleocytoplasmic shuttling of STAU2. Binds to DNA and RNA (By similarity). {ECO:0000250}.	14			Q96KR1	13.25	8.5	11.75	0	0	0	0	0	0	0	0	0	0	0	0	0	0	0	0
Q16650	TBR1	1	4	0.308582		MATR3	P43243	Matrin-3	FUNCTION: May play a role in transcription or may interact with other nuclear matrix proteins to form the internal fibrogranular network. In association with the SFPQ-NONO heteromer may play a role in nuclear retention of defective RNAs. Plays a role in the regulation of DNA virus-mediated innate immune response by assembling into the HDP-RNP complex, a complex that serves as a platform for IRF3 …	15	x		P43243	27.75	24.5	28.25	19.5	0	0	0	0	0	0	0	0	0	0	0	0	0	0	0
Q99581	FEV	1	4	0.308582		PR40A	O75400	Pre-mRNA-processing factor 40 homolog A (Fas ligand-associated factor 1) (Formin-binding protein 11) (Formin-binding protein 3) (Huntingtin yeast partner A) (Huntingtin-interacting protein 10) (HIP-10) (Huntingtin-interacting protein A) (Renal carcinoma antigen NY-REN-6)	FUNCTION: Binds to WASL/N-WASP and suppresses its translocation from the nucleus to the cytoplasm, thereby inhibiting its cytoplasmic function (By similarity). Plays a role in the regulation of cell morphology and cytoskeletal organization. Required in the control of cell shape and migration. May play a role in cytokinesis. May be involved in pre-mRNA splicing. {ECO:0000250, ECO:0000269|PubMed:21…	16	x		O75400	12.5	12.5	15.25	0	0	0	0	0	0	0	0	0	0	0	0	0	0	0	0
P55771	PAX9	1	3.5	0.27001		CCAR1	Q8IX12	Cell division cycle and apoptosis regulator protein 1 (Cell cycle and apoptosis regulatory protein 1) (CARP-1) (Death inducer with SAP domain)	FUNCTION: Associates with components of the Mediator and p160 coactivator complexes that play a role as intermediaries transducing regulatory signals from upstream transcriptional activator proteins to basal transcription machinery at the core promoter. Recruited to endogenous nuclear receptor target genes in response to the appropriate hormone. Also functions as a p53 coactivator. May thus play …	17	x		Q8IX12	24.5	26.5	21	0	0	0	0	0	0	0	0	0	0	0	0	0	0	0	0
Q9BXK1	KLF16	1	3	0.231437		CPSF7	Q8N684	Cleavage and polyadenylation specificity factor subunit 7 (Cleavage and polyadenylation specificity factor 59 kDa subunit) (CPSF 59 kDa subunit) (Cleavage factor Im complex 59 kDa subunit) (CFIm59) (Pre-mRNA cleavage factor Im 59 kDa subunit)	FUNCTION: Component of the cleavage factor Im (CFIm) complex that functions as an activator of the pre-mRNA 3'-end cleavage and polyadenylation processing required for the maturation of pre-mRNA into functional mRNAs (PubMed:8626397, PubMed:17024186, PubMed:29276085). CFIm contributes to the recruitment of multiprotein complexes on specific sequences on the pre-mRNA 3'-end, so called cleavage and…	18	x		Q8N684	18.25	23	21.25	0	3	4	0	5.5	0	0	0	0	0	0	0	0	4.25	0	0
O60248	SOX15	1	2	0.154291		SFR15	O95104	Splicing factor, arginine/serine-rich 15 (CTD-binding SR-like protein RA4) (SR-related and CTD-associated factor 4)	FUNCTION: May act to physically and functionally link transcription and pre-mRNA processing. {ECO:0000250}.	19	x		O95104	0	11	11.5	0	0	0	0	0	0	0	0	0	0	0	0	0	0	0	0
						DDX17	Q92841	Probable ATP-dependent RNA helicase DDX17 (EC 3.6.4.13) (DEAD box protein 17) (DEAD box protein p72) (DEAD box protein p82) (RNA-dependent helicase p72)	FUNCTION: As an RNA helicase, unwinds RNA and alters RNA structures through ATP binding and hydrolysis. Involved in multiple cellular processes, including pre-mRNA splicing, alternative splicing, ribosomal RNA processing and miRNA processing, as well as transcription regulation. Regulates the alternative splicing of exons exhibiting specific features (PubMed:12138182, PubMed:23022728, PubMed:2491…	20			Q92841	7	14.5	9	5	0	0	0	0	0	0	0	0	0	0	0	0	0	0	0
						RBM20	Q5T481	RNA-binding protein 20 (RNA-binding motif protein 20)	FUNCTION: RNA-binding protein that acts as a regulator of mRNA splicing of a subset of genes involved in cardiac development. Regulates splicing of TTN (Titin). {ECO:0000269|PubMed:22466703}.	21	x		Q5T481	13.25	20	9.5	5.5	0	0	0	0	12.75	0	0	0	0	0	0	0	0	0	0
						HNRPM	P52272	Heterogeneous nuclear ribonucleoprotein M (hnRNP M)	FUNCTION: Pre-mRNA binding protein in vivo, binds avidly to poly(G) and poly(U) RNA homopolymers in vitro. Involved in splicing. Acts as a receptor for carcinoembryonic antigen in Kupffer cells, may initiate a series of signaling events leading to tyrosine phosphorylation of proteins and induction of IL-1 alpha, IL-6, IL-10 and tumor necrosis factor alpha cytokines.	22	x		P52272	22.25	34.5	24.75	16	0	0	0	0	0	0	0	0	0	0	0	3.5	0	0	0
						PCF11	O94913	Pre-mRNA cleavage complex 2 protein Pcf11 (Pre-mRNA cleavage complex II protein Pcf11)	FUNCTION: Component of pre-mRNA cleavage complex II.	23	x		O94913	20	29.5	21.75	0	0	0	0	0	0	0	0	0	0	0	0	0	0	0	0
						FUBP1	Q96AE4	Far upstream element-binding protein 1 (FBP) (FUSE-binding protein 1) (DNA helicase V) (hDH V)	FUNCTION: Regulates MYC expression by binding to a single-stranded far-upstream element (FUSE) upstream of the MYC promoter. May act both as activator and repressor of transcription. {ECO:0000269|PubMed:8125259}.	24			Q96AE4	20.5	24.5	16.75	0	0	0	5.5	0	0	0	0	4.5	4.5	5	5	0	0	4.5	4
						RBM12	Q9NTZ6	RNA-binding protein 12 (RNA-binding motif protein 12) (SH3/WW domain anchor protein in the nucleus) (SWAN)		25			Q9NTZ6	13.75	15.5	8.25	0	0	0	0	0	0	0	0	0	0	0	0	0	0	0	0
						KHDR1	Q07666	KH domain-containing, RNA-binding, signal transduction-associated protein 1 (GAP-associated tyrosine phosphoprotein p62) (Src-associated in mitosis 68 kDa protein) (Sam68) (p21 Ras GTPase-activating protein-associated p62) (p68)	FUNCTION: Recruited and tyrosine phosphorylated by several receptor systems, for example the T-cell, leptin and insulin receptors. Once phosphorylated, functions as an adapter protein in signal transduction cascades by binding to SH2 and SH3 domain-containing proteins. Role in G2-M progression in the cell cycle. Represses CBP-dependent transcriptional activation apparently by competing with other…	26	x		Q07666	6.75	5	0	0	0	0	0	0	0	0	0	0	0	0	0	0	0	0	0
						CPSF4	O95639	Cleavage and polyadenylation specificity factor subunit 4 (Cleavage and polyadenylation specificity factor 30 kDa subunit) (CPSF 30 kDa subunit) (NS1 effector domain-binding protein 1) (Neb-1) (No arches homolog)	FUNCTION: Component of the cleavage and polyadenylation specificity factor (CPSF) complex that play a key role in pre-mRNA 3'-end formation, recognizing the AAUAAA signal sequence and interacting with poly(A) polymerase and other factors to bring about cleavage and poly(A) addition. CPSF4 binds RNA polymers with a preference for poly(U). {ECO:0000269|PubMed:14749727, ECO:0000269|PubMed:9224719}.	27	x		O95639	9.5	7.5	0	0	0	0	0	0	0	0	0	0	0	0	0	0	0	0	0
						ZN638	Q14966	Zinc finger protein 638 (Cutaneous T-cell lymphoma-associated antigen se33-1) (CTCL-associated antigen se33-1) (Nuclear protein 220) (Zinc finger matrin-like protein)	FUNCTION: Early regulator of adipogenesis that works as a transcription cofactor of CEBPs, controlling the expression of PPARG and probably of other proadipogenic genes, such as SREBF1 (By similarity). Binds to cytidine clusters in double-stranded DNA (PubMed:8647861). May also regulate alternative splicing of target genes during adipogenesis (By similarity). {ECO:0000250|UniProtKB:Q61464, ECO:00…	28	x		Q14966	24.5	21.5	0	0	0	0	0	0	0	0	0	0	0	0	0	0	0	0	0
						ZN318	Q5VUA4	Zinc finger protein 318 (Endocrine regulatory protein)	FUNCTION: Isoform 2: Acts as a transcriptional corepressor for AR-mediated transactivation function. May act as a transcriptional regulator during spermatogenesis and, in particular, during meiotic division. {ECO:0000250|UniProtKB:Q99PP2}.; FUNCTION: Isoform 1: Acts as a transcriptional coactivator for AR-mediated transactivation function. May act as a transcriptional regulator during spermatogen…	29	x		Q5VUA4	55.25	69	0	0	0	0	0	0	0	0	0	0	0	0	0	0	0	0	0

[truncated: 5 more sheets: C11, C12, C13, C14, C15]
