# Supplementary material for: Human transcription factor protein interaction networks
Source: Research Square preprint supplement (doi:10.21203/rs.3.rs-228624/v1), 2021-02-23
Supplement: Supplementary file 3 [file 649d577d88a1c9df116c8361.xlsx]

## Sheet: S1A Baits
TF	TF Uniprot	TF ENSG	DBD	Vector(s)	Source	AP-MS	BioID
BRAC	O15178	ENSG00000164458	T-box	pTO-SH-gw-FRT-N, pTO-BirA-Myc-N	in House	X	X
CPEB1	Q9BZB8	ENSG00000214575	Unknown	pTO-SH-gw-FRT-N, pTO-BirA-Myc-N	in House	X	X
CREB1	P16220	ENSG00000118260	bZIP	pTO-SH-gw-FRT-N, pTO-BirA-Myc-N	in House	X	X
E2F1	Q01094	ENSG00000101412	E2F	pTO-SH-gw-FRT-N, pTO-BirA-Myc-N	in House	X	X
ELF1	P32519	ENSG00000120690	Ets	MAC-N	in House (GBU)	X	X
ELF2	Q15723	ENSG00000109381	Ets	MAC-N	in House (GBU)	X	X
ELF3	P78545	ENSG00000163435	Ets;_AT_hook	MAC-N	in House (GBU)	X	X
ELF4	Q99607	ENSG00000102034	Ets	MAC-N	in House (GBU)	X	X
ELF5	Q9UKW6	ENSG00000135374	Ets	MAC-N	in House (GBU)	X	X
ELK3	P41970	ENSG00000111145	Ets	MAC-N	in House (GBU)	X	X
ELK4	P28324	ENSG00000158711	Ets	MAC-N	in House (GBU)	X	X
ERG	P11308	ENSG00000157554	Ets	MAC-N	in House (GBU)	X	X
ESR1	P03372	ENSG00000091831	Nuclear_receptor	pTO-SH-gw-FRT-N, pTO-BirA-Myc-N	in House	X	X
ETS1	P14921	ENSG00000134954	Ets	pTO-SH-gw-FRT-N, pTO-BirA-Myc-N	in House	X	X
ETV3	P41162	ENSG00000117036	Ets	MAC-N	in House (GBU)	X	X
ETV4	P43268	ENSG00000175832	Ets	MAC-N	in House (GBU)	X	X
ETV5	P41161	ENSG00000244405	Ets	MAC-N	in House (GBU)	X	X
ETV6	P41212	ENSG00000139083	Ets	MAC-N	in House (GBU)	X	X
ETV7	Q9Y603	ENSG00000010030	Ets	MAC-N	in House (GBU)	X	X
FEV	Q99581	ENSG00000163497	Ets	MAC-N	in House (GBU)	X	X
FOS	P01100	ENSG00000170345	bZIP	pTO-SH-gw-FRT-N, pTO-BirA-Myc-N	in House	X	X
FOXI1	Q12951	ENSG00000168269	Forkhead	pTO-SH-gw-FRT-N, pTO-BirA-Myc-N	in House	X	X
FOXL1	Q12952	ENSG00000176678	Forkhead	pTO-SH-gw-FRT-N, pTO-BirA-Myc-N	in House	X	X
FOXQ1	Q9C009	ENSG00000164379	Forkhead	pTO-SH-gw-FRT-N, pTO-BirA-Myc-N	in House	X	X
GATA1	P15976	ENSG00000102145	GATA	pTO-SH-gw-FRT-N, pTO-BirA-Myc-N	in House	X	X
GATA2	P23769	ENSG00000179348	GATA	pTO-SH-gw-FRT-N, pTO-BirA-Myc-N	in House	X	X
GATA3	P23771	ENSG00000107485	GATA	pTO-SH-gw-FRT-N, pTO-BirA-Myc-N	in House	X	X
GATA4	P43694	ENSG00000136574	GATA	MAC-N	Synthesized	X
GCM1	Q9NP62	ENSG00000137270	GCM	MAC-N	hOrfeome5.1	X	X
GLI2	P10070	ENSG00000074047	C2H2_ZF	pTO-SH-gw-FRT-N, pTO-BirA-Myc-N	in House	X	X
GLI3	P10071	ENSG00000106571	C2H2_ZF	pTO-SH-gw-FRT-N, pTO-BirA-Myc-N	in House	X	X
HEN1	Q02575	ENSG00000171786	bHLH	pTO-SH-gw-FRT-N, pTO-BirA-Myc-N	in House	X	X
HME1	Q05925	ENSG00000163064	Homeodomain	pTO-SH-gw-FRT-N, pTO-BirA-Myc-N	in House	X	X
HNF1a	P20823	ENSG00000135100	Homeodomain	pTO-SH-gw-FRT-N, pTO-BirA-Myc-N	in House	X	X
HNF1B	P35680	ENSG00000275410	Homeodomain	pTO-SH-gw-FRT-N, pTO-BirA-Myc-N	in House	X	X
HNF4a	P41235	ENSG00000101076	Nuclear_receptor	pTO-SH-gw-FRT-N, pTO-BirA-Myc-N	in House	X	X
IRF1	P10914	ENSG00000125347	IRF	MAC-N	in House (GBU)	X	X
IRF3	Q14653	ENSG00000126456	IRF	MAC-N	in House (GBU)	X	X
IRF4	Q15306	ENSG00000137265	IRF	MAC-N	in House (GBU)	X	X
IRF5	Q13568	ENSG00000128604	IRF	MAC-N	in House (GBU)	X	X
IRF8	Q02556	ENSG00000140968	IRF	MAC-N	hOrfeome5.1	X	X
IRF9	Q00978	ENSG00000213928	IRF	MAC-N	in House (GBU)	X	X
ISX	Q2M1V0	ENSG00000175329	Homeodomain	MAC-N	hOrfeome5.1	X	X
KLF10	Q13118	ENSG00000155090	C2H2_ZF	MAC-N	in House (GBU)	X	X
KLF12	Q9Y4X4	ENSG00000118922	C2H2_ZF	MAC-N	in House (GBU)	X	X
KLF15	Q9UIH9	ENSG00000163884	C2H2_ZF	MAC-N	in House (GBU)	X	X
KLF16	Q9BXK1	ENSG00000129911	C2H2_ZF	MAC-N	in House (GBU)	X	X
KLF3	P57682	ENSG00000109787	C2H2_ZF	MAC-N	in House (GBU)	X	X
KLF4	O43474	ENSG00000136826	C2H2_ZF	pTO-SH-gw-FRT-N, pTO-BirA-Myc-N	in House	X	X
KLF5	Q13887	ENSG00000102554	C2H2_ZF	MAC-N	in House (GBU)	X	X
KLF6	Q99612	ENSG00000067082	C2H2_ZF	MAC-N	in House (GBU)	X	X
KLF8	O95600	ENSG00000102349	C2H2_ZF	MAC-N	in House (GBU)	X	X
KLF9	Q13886	ENSG00000119138	C2H2_ZF	MAC-N	in House (GBU)	X	X
LHX1	P48742	ENSG00000273706	Homeodomain	MAC-N	in House (GBU)	X	X
LHX2	P50458	ENSG00000106689	Homeodomain	MAC-N	in House (GBU)	X	X
LHX3	Q9UBR4	ENSG00000107187	Homeodomain	MAC-N	in House (GBU)	X	X
LHX4	Q969G2	ENSG00000121454	Homeodomain	MAC-N	in House (GBU)	X	X
LHX6	Q9UPM6	ENSG00000106852	Homeodomain	MAC-N	hOrfeome5.1	X	X
LHX8	Q68G74	ENSG00000162624	Homeodomain	MAC-N	in House (GBU)	X	X
MEF2A	Q02078	ENSG00000068305	MADS_box	pTO-SH-gw-FRT-N, pTO-BirA-Myc-N	in House	X	X
MYB	P10242	ENSG00000118513	Myb/SANT	pTO-SH-gw-FRT-N, pTO-BirA-Myc-N	in House	X	X
MYC	P01106	ENSG00000136997	bHLH	pTO-SH-gw-FRT-N, pTO-BirA-Myc-N	in House	X	X
MYOD1	P15172	ENSG00000129152	bHLH	pTO-SH-gw-FRT-N, pTO-BirA-Myc-N	in House	X	X
NFAC3	Q12968	ENSG00000072736	Rel	MAC-N	in House (GBU)	X	X
NFAC4	Q14934	ENSG00000100968	Rel	MAC-N	in House (GBU)	X	X
NFIA	Q12857	ENSG00000162599	SMAD	MAC-N	in House (GBU)	X	X
NFIB	O00712	ENSG00000147862	SMAD	MAC-N	in House (GBU)	X	X
NFIC	P08651	ENSG00000141905	SMAD	MAC-N	in House (GBU)	X	X
NFIX	Q14938	ENSG00000008441	SMAD	pTO-SH-gw-FRT-N, pTO-BirA-Myc-N	in House	X	X
NFKB1	P19838	ENSG00000109320	Rel	pTO-SH-gw-FRT-N, pTO-BirA-Myc-N	in House	X	X
NFYC	Q13952	ENSG00000066136	Unknown	pTO-SH-gw-FRT-N, pTO-BirA-Myc-N	in House	X	X
NKX25	P52952	ENSG00000183072	Homeodomain	MAC-N	Synthesized	X
P53	P04637	ENSG00000141510	p53	pTO-SH-gw-FRT-N, pTO-BirA-Myc-N	in House	X
PAX2	Q02962	ENSG00000075891	Homeodomain;_Paired_box	MAC-N	in House (GBU)	X	X
PAX6	P26367	ENSG00000007372	Homeodomain;_Paired_box	pTO-SH-gw-FRT-N, pTO-BirA-Myc-N	in House	X	X
PAX7	P23759	ENSG00000009709	Homeodomain;_Paired_box	MAC-N	hOrfeome5.1	X	X
PAX8	Q06710	ENSG00000125618	Paired_box	MAC-N	in House (GBU)	X	X
PAX9	P55771	ENSG00000198807	Paired_box	MAC-N	in House (GBU)	X	X
PPARG	P37231	ENSG00000132170	Nuclear_receptor	pTO-SH-gw-FRT-N, pTO-BirA-Myc-N	in House	X	X
PRDM1	O75626	ENSG00000057657	C2H2_ZF	MAC-N	hOrfeome5.1	X	X
RREB1	Q92766	ENSG00000124782	C2H2_ZF	pTO-SH-gw-FRT-N, pTO-BirA-Myc-N	in House		X
RXRa	P19793	ENSG00000186350	Nuclear_receptor	pTO-SH-gw-FRT-N, pTO-BirA-Myc-N	in House	X
SMAD5	Q99717	ENSG00000113658	SMAD	pTO-SH-gw-FRT-N, pTO-BirA-Myc-N	in House		X
SOX10	P56693	ENSG00000100146	HMG/Sox	MAC-N	in House (GBU)	X	X
SOX15	O60248	ENSG00000129194	HMG/Sox	MAC-N	in House (GBU)	X	X
SOX17	Q9H6I2	ENSG00000164736	HMG/Sox	MAC-N	in House (GBU)	X	X
SOX2	P48431	ENSG00000181449	HMG/Sox	MAC-N	in House (GBU)	X	X
SOX4	Q06945	ENSG00000124766	HMG/Sox	MAC-N	in House (GBU)	X	X
SOX5	P35711	ENSG00000134532	HMG/Sox	MAC-N	in House (GBU)	X	X
SOX6	P35712	ENSG00000110693	HMG/Sox	MAC-N	in House (GBU)	X	X
SOX9	P48436	ENSG00000125398	HMG/Sox	pTO-SH-gw-FRT-N, pTO-BirA-Myc-N	in House	X	X
SP1	P08047	ENSG00000185591	C2H2_ZF	pTO-SH-gw-FRT-N, pTO-BirA-Myc-N	in House	X	X
SP7	Q8TDD2	ENSG00000170374	C2H2_ZF	MAC-N	in House (GBU)	X	X
SPZ1	Q9BXG8	ENSG00000164299	Unknown	pTO-SH-gw-FRT-N, pTO-BirA-Myc-N	in House	X	X
STA5A	P42229	ENSG00000126561	STAT	MAC-N	in House (GBU)	X
STA5B	P51692	ENSG00000173757	STAT	MAC-N	in House (GBU)	X	X
STAT1	P42224	ENSG00000115415	STAT	pTO-SH-gw-FRT-N, pTO-BirA-Myc-N	in House	X	X
STAT3	P40763	ENSG00000168610	STAT	MAC-N	Haapaniemi/Kere	X	X
STAT4	Q14765	ENSG00000138378	STAT	MAC-N	in House (GBU)	X	X
TAL1	P17542	ENSG00000162367	bHLH	pTO-SH-gw-FRT-N, pTO-BirA-Myc-N	in House	X	X
TBR1	Q16650	ENSG00000136535	T-box	MAC-N	hOrfeome5.1		X
TEAD1	P28347	ENSG00000187079	TEA	pTO-SH-gw-FRT-N, pTO-BirA-Myc-N	in House	X	X
TEAD2	Q15562	ENSG00000074219	TEA	MAC-N	in House (GBU)	X	X
TEAD3	Q99594	ENSG00000007866	TEA	MAC-N	in House (GBU)	X	X
TLX1	P31314	ENSG00000107807	Homeodomain	pTO-SH-gw-FRT-N, pTO-BirA-Myc-N	in House	X	X
TLX2	O43763	ENSG00000115297	Homeodomain	MAC-N	in House (GBU)	X	X
TLX3	O43711	ENSG00000164438	Homeodomain	MAC-N	in House (GBU)	X	X
TYY1	P25490	ENSG00000100811	C2H2_ZF	pTO-SH-gw-FRT-N, pTO-BirA-Myc-N	in House	X	X
VSX1	Q9NZR4	ENSG00000100987	Homeodomain	MAC-N	hOrfeome5.1	X	X
ZIC3	O60481	ENSG00000156925	C2H2_ZF	MAC-N	hOrfeome5.1	X

## Sheet: S1B BioID
Bait	Bait Uniprot	BAIT ENSG	Bait DBD	Prey	PreyGene	Prey protein name	How many TFs prey interacts with	Corum complexes	Spec	SpecSum	AvgSpec	NumReplicates	ctrlCounts	SaintScore	Seen in any of the others studies	Intact	Biogrid	PINA2	String _all	String_experimental	Match to Li et al. 2015
BRAC	O15178	ENSG00000164458	T-box	Q8NHM5	KDM2B	Lysine-specific demethylase 2B (EC 1.14.11.27) (CXXC-type zinc finger protein 2) (F-box and leucine-rich repeat protein 10) (F-box protein FBL10) (F-box/LRR-repeat protein 10) (JmjC domain-containing histone demethylation protein 1B) (Jumonji domain-containing EMSY-interactor methyltransferase motif protein) (Protein JEMMA) (Protein-containing CXXC domain 2) ([Histone-H3]-lysine-36 demethylase 1B)	62	BCOR complex	26|22|29|25	102	25.5	4	1|3|1|0|4|2|2|2|4|2|0|0|0|0|0|0|1|0|0|1|1|0|0|0|0|0|5|5|0|0|0|0|0|0|0|0|0|0|0|0|2|1|0|0	1
BRAC	O15178	ENSG00000164458	T-box	O14686	KMT2D	Histone-lysine N-methyltransferase 2D (Lysine N-methyltransferase 2D) (EC 2.1.1.43) (ALL1-related protein) (Myeloid/lymphoid or mixed-lineage leukemia protein 2)	58	WDR5-ASH2L-RBBP5-MLL2 complex, ASCOM complex, MOF complex, UTX-MLL2/3 complex, PITX2-MLL4-ASH2L-RBBP5-PTIP complex, MLL2 complex, MLL4 complex	73|71|76|83	303	75.75	4	4|2|6|6|7|3|1|1|3|3|1|1|2|1|0|0|0|0|0|0|1|1|0|1|0|0|7|12|1|0|7|9|0|0|0|1|0|2|0|0|4|6|0|0	1
BRAC	O15178	ENSG00000164458	T-box	Q12857	NFIA	Nuclear factor 1 A-type (NF1-A) (Nuclear factor 1/A) (CCAAT-box-binding transcription factor) (CTF) (Nuclear factor I/A) (NF-I/A) (NFI-A) (TGGCA-binding protein)	54		8|7|8|10	33	8.25	4	4|2|3|0|0|0|3|0|3|0|0|0|1|0|0|0|0|0|0|0|0|0|0|0|0|0|1|0|0|3|3|0|0|0|0|0|0|0|0|0|0|1|0|0	0.98
BRAC	O15178	ENSG00000164458	T-box	O15550	KDM6A	Lysine-specific demethylase 6A (EC 1.14.11.-) (Histone demethylase UTX) (Ubiquitously-transcribed TPR protein on the X chromosome) (Ubiquitously-transcribed X chromosome tetratricopeptide repeat protein)	53	UTX-MLL2/3 complex, PTIP-HMT complex, MLL3 complex, MLL4 complex	21|23|26|27	97	24.25	4	3|1|3|0|4|0|2|1|1|1|0|0|0|0|0|0|0|0|0|0|0|0|0|0|0|0|0|0|0|0|2|3|0|0|0|0|0|0|0|0|2|1|0|0	1	X				X	X
BRAC	O15178	ENSG00000164458	T-box	Q04724	TLE1	Transducin-like enhancer protein 1 (E(Sp1) homolog) (Enhancer of split groucho-like protein 1) (ESG1)	53	TLE1 corepressor complex (MASH1 promoter-corepressor complex), OCT1-OBF1-DNA-TLE1 complex, TLE1-TLE2 complex, TLE1 homodimer complex, TLE-Histone H3 complex, Hes1-TLE1 complex, TLE1 corepressor complex (MASH1 promoter-corepressor complex), NK-3-Groucho-HIPK2-SIN3A-RbpA48-HDAC1 complex, NK-3-Groucho complex, HESX1-TLE1 complex, CUL4B-DDB1-TLE1 complex, TBX20-TLE1 repressor complex	17|18|19|19	73	18.25	4	7|6|4|0|4|0|8|0|9|5|0|0|0|0|0|0|0|0|0|0|0|0|0|0|0|0|1|1|0|0|1|1|0|0|0|0|0|0|0|0|0|0|0|0	0.99
BRAC	O15178	ENSG00000164458	T-box	Q96RK0	CIC	Protein capicua homolog	52		27|30|35|31	123	30.75	4	13|9|7|5|9|4|13|3|10|7|1|0|0|0|2|1|0|1|0|0|0|0|0|1|0|2|13|15|2|1|5|5|0|0|3|2|0|2|0|0|8|3|1|0	0.99
BRAC	O15178	ENSG00000164458	T-box	P15822	ZEP1	Zinc finger protein 40 (Cirhin interaction protein) (CIRIP) (Gate keeper of apoptosis-activating protein) (GAAP) (Human immunodeficiency virus type I enhancer-binding protein 1) (HIV-EP1) (Major histocompatibility complex-binding protein 1) (MBP-1) (Positive regulatory domain II-binding factor 1) (PRDII-BF1)	52		6|10|17|10	43	10.75	4	1|1|1|1|0|2|2|0|1|1|0|0|0|0|0|0|0|0|0|0|0|0|0|2|0|0|1|1|0|0|1|2|0|0|0|0|0|0|0|0|1|0|0|0	1
BRAC	O15178	ENSG00000164458	T-box	Q9UHF7	TRPS1	Zinc finger transcription factor Trps1 (Tricho-rhino-phalangeal syndrome type I protein) (Zinc finger protein GC79)	50		8|9|11|13	41	10.25	4	0|0|3|0|1|0|0|0|0|0|0|1|0|1|0|0|0|0|0|0|0|0|0|0|0|0|6|7|0|1|2|4|0|0|0|0|0|0|0|0|0|0|0|0	0.97
BRAC	O15178	ENSG00000164458	T-box	O15014	ZN609	Zinc finger protein 609	50		31|27|26|27	111	27.75	4	6|4|3|2|5|0|9|1|7|3|0|0|0|0|0|0|0|0|0|0|0|0|0|0|1|2|4|7|2|1|10|9|0|0|1|1|1|0|0|0|2|0|0|2	1
BRAC	O15178	ENSG00000164458	T-box	Q6W2J9	BCOR	BCL-6 corepressor (BCoR)	48	BCOR complex	87|99|104|95	385	96.25	4	32|31|21|10|29|12|29|11|29|18|11|7|10|7|3|4|7|2|3|3|1|4|0|1|0|4|40|35|7|8|16|31|1|3|6|5|5|7|0|0|20|16|4|5	1
BRAC	O15178	ENSG00000164458	T-box	Q9Y618	NCOR2	Nuclear receptor corepressor 2 (N-CoR2) (CTG repeat protein 26) (SMAP270) (Silencing mediator of retinoic acid and thyroid hormone receptor) (SMRT) (T3 receptor-associating factor) (TRAC) (Thyroid-, retinoic-acid-receptor-associated corepressor)	48	SMRT complex, NCOR-SIN3-RPD3 complex, NCOR-SIN3-HDAC1 complex, SMRT core complex, SMRT core complex, NCOR2 complex, SMRT-SKIP-CBF1 complex, CBF1-HDAC1-SMRT complex, NCOR-SIN3-HDAC-HESX1 complex, HERP1/HEY2-NCOR-SIN3A complex	37|29|39|40	145	36.25	4	4|6|4|2|2|1|6|2|7|5|0|0|0|0|0|0|0|0|0|0|0|0|0|0|0|0|17|9|0|0|9|6|0|0|0|0|0|0|0|0|4|3|0|0	1
BRAC	O15178	ENSG00000164458	T-box	Q6ZW49	PAXI1	PAX-interacting protein 1 (PAX transactivation activation domain-interacting protein)	47	UTX-MLL2/3 complex, PTIP-HMT complex, PTIP-DNA damage response complex, PITX2-MLL4-ASH2L-RBBP5-PTIP complex, MLL3 complex, MLL4 complex	23|19|21|16	79	19.75	4	4|2|6|2|3|2|4|2|3|2|0|0|0|0|0|0|0|0|0|0|0|0|0|0|0|0|2|3|0|0|0|3|0|0|0|0|0|0|0|0|2|0|0|0	1
BRAC	O15178	ENSG00000164458	T-box	P51531	SMCA2	Probable global transcription activator SNF2L2 (EC 3.6.4.-) (ATP-dependent helicase SMARCA2) (BRG1-associated factor 190B) (BAF190B) (Protein brahma homolog) (hBRM) (SNF2-alpha) (SWI/SNF-related matrix-associated actin-dependent regulator of chromatin subfamily A member 2)	46	BAF complex, SWI-SNF chromatin remodeling-related-BRCA1 complex, BAF complex, Brm-associated complex, BRM-SIN3A complex, BRM-SIN3A-HDAC complex, BRM-associated complex, WINAC complex, BAF complex, BAF complex, ALL-1 supercomplex, RNA polymerase II complex (RPB1, RAP74, CDK8, CYCC, SRB7, BAF190, BAF47), chromatin structure modifying, RNA polymerase II complex, chromatin structure modifying, RNA po…	24|31|36|37	128	32	4	19|18|19|10|23|14|19|7|20|11|2|0|0|0|0|0|0|0|0|0|0|0|0|0|0|0|0|9|0|0|0|0|0|0|0|0|0|0|0|0|14|13|0|0	0.93	X				X	X
BRAC	O15178	ENSG00000164458	T-box	Q4LE39	ARI4B	AT-rich interactive domain-containing protein 4B (ARID domain-containing protein 4B) (180 kDa Sin3-associated polypeptide) (Sin3-associated polypeptide p180) (Breast cancer-associated antigen BRCAA1) (Histone deacetylase complex subunit SAP180) (Retinoblastoma-binding protein 1-like 1)	46	SAP complex (Sin3-associated protein complex), SAP complex (Sin3-associated protein complex), SIN3-HDAC-SAP30-ARID4 complex, SIN3-SAP25 complex, SIN3-HDAC-SAP30-ARID4 complex, BRMS1-RBP1 complex, SIN3-HDAC-SAP30-ARID4 complex, SIN3-ING1b complex I, SIN3-ING1b complex II, SIN3-SAP25 complex	12|11|14|15	52	13	4	3|4|3|0|1|1|1|0|1|1|3|2|2|1|0|3|2|0|1|1|2|2|2|2|0|0|2|1|2|1|3|4|0|0|2|0|0|0|0|0|2|3|1|1	1
BRAC	O15178	ENSG00000164458	T-box	Q8NFD5	ARI1B	AT-rich interactive domain-containing protein 1B (ARID domain-containing protein 1B) (BRG1-associated factor 250b) (BAF250B) (BRG1-binding protein hELD/OSA1) (Osa homolog 2) (hOsa2) (p250R)	45	BAF complex, EBAFb complex, RSmad complex	39|33|41|44	157	39.25	4	12|14|5|3|10|4|9|2|9|3|0|0|0|0|0|0|1|0|0|0|0|0|0|0|1|0|12|19|0|2|4|8|0|0|1|0|0|0|0|0|1|1|0|0	0.99
BRAC	O15178	ENSG00000164458	T-box	Q92782	DPF1	Zinc finger protein neuro-d4 (BRG1-associated factor 45B) (BAF45B) (D4, zinc and double PHD fingers family 1)	45		6|6|8|7	27	6.75	4	0|0|2|0|0|0|0|0|0|0|0|0|0|0|0|0|0|0|0|0|0|0|0|0|0|0|0|0|0|0|0|1|0|0|0|0|0|0|0|0|0|0|0|0	1
BRAC	O15178	ENSG00000164458	T-box	Q92785	REQU	Zinc finger protein ubi-d4 (Apoptosis response zinc finger protein) (BRG1-associated factor 45D) (BAF45D) (D4, zinc and double PHD fingers family 2) (Protein requiem)	43	LARC complex (LCR-associated remodeling complex)	18|19|20|22	79	19.75	4	9|7|7|3|10|4|8|3|8|3|1|1|0|1|0|0|1|0|1|0|0|0|2|1|0|1|5|5|2|5|8|8|0|0|4|4|1|1|0|0|8|8|1|1	0.97
BRAC	O15178	ENSG00000164458	T-box	Q9H582	ZN644	Zinc finger protein 644 (Zinc finger motif enhancer-binding protein 2) (Zep-2)	43		3|2|3|2	10	2.5	4	0|0|0|0|0|0|0|0|0|0|0|0|0|0|0|0|0|0|0|0|0|0|0|0|0|0|2|3|0|0|1|3|0|0|0|0|0|0|0|0|1|0|0|0	0.81
BRAC	O15178	ENSG00000164458	T-box	O14497	ARI1A	AT-rich interactive domain-containing protein 1A (ARID domain-containing protein 1A) (B120) (BRG1-associated factor 250) (BAF250) (BRG1-associated factor 250a) (BAF250A) (Osa homolog 1) (hOSA1) (SWI-like protein) (SWI/SNF complex protein p270) (SWI/SNF-related, matrix-associated, actin-dependent regulator of chromatin subfamily F member 1) (hELD)	42	NUMAC complex (nucleosomal methylation activator complex), BAF complex, SWI-SNF chromatin remodeling-related-BRCA1 complex, BAF complex, BAF complex, BAF complex, p300-CBP-p270-SWI/SNF complex, p300-CBP-p270 complex, Brg1-associated complex I, Brm-associated complex, BRG1-SIN3A complex, BRM-SIN3A complex, SIN3-ING1b complex II, LARC complex (LCR-associated remodeling complex), BRG1-SIN3A-HDAC con…	59|53|60|60	232	58	4	23|26|17|5|20|10|15|4|18|4|3|3|2|1|1|0|2|0|0|0|0|0|1|1|1|2|30|40|5|4|20|24|1|0|7|8|4|9|0|0|19|17|3|5	0.98
BRAC	O15178	ENSG00000164458	T-box	Q9BSM1	PCGF1	Polycomb group RING finger protein 1 (Nervous system Polycomb-1) (NSPc1) (RING finger protein 68)	42	BCOR complex	4|2|5|5	16	4	4	3|1|1|1|1|1|1|2|3|0|1|0|0|0|1|1|1|0|1|0|0|0|0|0|0|1|1|1|1|0|1|1|0|0|0|0|0|1|0|0|0|2|0|0	0.77
BRAC	O15178	ENSG00000164458	T-box	Q9UPW6	SATB2	DNA-binding protein SATB2 (Special AT-rich sequence-binding protein 2)	42		7|6|6|5	24	6	4	0|5|3|2|4|2|0|0|7|3|0|0|0|0|0|0|0|0|0|0|0|0|0|0|0|2|4|2|0|0|0|0|0|0|0|0|2|1|0|0|0|3|0|0	0.81
BRAC	O15178	ENSG00000164458	T-box	Q08117	AES	Amino-terminal enhancer of split (Amino enhancer of split) (Gp130-associated protein GAM) (Grg-5) (Groucho-related protein 5) (Protein ESP1) (Protein GRG)	41		5|5|5|5	20	5	4	0|2|2|0|1|0|0|0|0|1|0|0|0|0|0|0|0|0|0|0|0|0|0|0|0|0|2|1|0|0|2|2|0|0|1|0|0|0|0|0|0|0|0|0	0.99	X				X	X
BRAC	O15178	ENSG00000164458	T-box	Q9P2D1	CHD7	Chromodomain-helicase-DNA-binding protein 7 (CHD-7) (EC 3.6.4.12) (ATP-dependent helicase CHD7)	40		8|11|13|11	43	10.75	4	0|10|0|0|0|0|14|0|10|0|0|0|0|0|0|0|0|0|0|0|0|3|0|0|0|0|11|14|0|0|5|7|0|0|0|0|0|0|0|0|7|4|0|0	0.81	X				X	X
BRAC	O15178	ENSG00000164458	T-box	P0C7T5	ATX1L	Ataxin-1-like (Brother of ataxin-1) (Brother of ATXN1)	40		4|7|4|6	21	5.25	4	1|0|0|0|0|0|0|0|0|0|0|0|0|0|0|0|1|0|0|0|0|0|0|0|0|0|0|1|0|0|0|0|0|0|0|0|0|0|0|0|0|0|0|0	1
BRAC	O15178	ENSG00000164458	T-box	O00512	BCL9	B-cell CLL/lymphoma 9 protein (B-cell lymphoma 9 protein) (Bcl-9) (Protein legless homolog)	40	beta-catenin-B-cell lymphoma 9 protein complex	17|21|14|13	65	16.25	4	2|5|1|0|1|0|2|0|3|2|0|0|0|0|0|0|0|0|0|0|0|0|0|0|0|0|4|2|0|0|3|2|0|0|0|0|0|0|0|0|0|0|0|0	1
BRAC	O15178	ENSG00000164458	T-box	Q96GM5	SMRD1	SWI/SNF-related matrix-associated actin-dependent regulator of chromatin subfamily D member 1 (60 kDa BRG-1/Brm-associated factor subunit A) (BRG1-associated factor 60A) (BAF60A) (SWI/SNF complex 60 kDa subunit)	39	NUMAC complex (nucleosomal methylation activator complex), PBAF complex (Polybromo- and BAF containing complex), BAF complex, PBAF complex (Polybromo- and BAF containing complex), BAF complex, PBAF complex (Polybromo- and BAF containing complex), BAF complex, PBAF complex (Polybromo- and BAF containing complex), BAF complex, Brg1-associated complex I, Brm-associated complex, BRG1-SIN3A complex, B…	25|18|25|22	90	22.5	4	9|13|10|6|13|8|9|3|10|5|0|0|0|0|2|0|2|0|0|2|0|1|0|0|0|0|5|7|3|3|9|10|1|2|3|5|0|2|0|0|10|9|3|3	0.94	X				X	X
BRAC	O15178	ENSG00000164458	T-box	Q8NEZ4	KMT2C	Histone-lysine N-methyltransferase 2C (Lysine N-methyltransferase 2C) (EC 2.1.1.43) (Homologous to ALR protein) (Myeloid/lymphoid or mixed-lineage leukemia protein 3)	39	ASCOM complex, UTX-MLL2/3 complex, PTIP-HMT complex, MLL3 complex	12|12|17|21	62	15.5	4	1|0|0|0|1|1|0|0|0|1|0|0|0|0|0|0|0|0|0|0|0|0|0|0|0|0|0|1|0|0|0|0|0|0|0|0|0|0|0|0|0|0|0|0	1
BRAC	O15178	ENSG00000164458	T-box	Q96KQ7	EHMT2	Histone-lysine N-methyltransferase EHMT2 (EC 2.1.1.-) (EC 2.1.1.43) (Euchromatic histone-lysine N-methyltransferase 2) (HLA-B-associated transcript 8) (Histone H3-K9 methyltransferase 3) (H3-K9-HMTase 3) (Lysine N-methyltransferase 1C) (Protein G9a)	38	CtBP complex, CtBP core complex, DNMT1-G9a-PCNA complex, DNMT1-G9a complex, E2F-6 complex	5|6|9|8	28	7	4	3|3|2|0|0|3|2|1|6|4|0|0|0|0|0|0|1|0|0|0|0|0|1|1|0|1|9|8|0|0|1|3|0|0|0|0|0|0|0|0|0|2|0|0	0.78
BRAC	O15178	ENSG00000164458	T-box	Q14687	GSE1	Genetic suppressor element 1	38	Anti-HDAC2 complex, anti-BHC110 complex, BHC110 complex	51|46|50|38	185	46.25	4	20|20|22|11|25|15|19|13|17|12|2|1|1|1|1|0|0|1|0|0|0|0|0|0|1|1|15|13|3|1|10|9|1|0|2|1|2|2|0|0|12|4|1|2	0.98
BRAC	O15178	ENSG00000164458	T-box	O00712	NFIB	Nuclear factor 1 B-type (NF1-B) (Nuclear factor 1/B) (CCAAT-box-binding transcription factor) (CTF) (Nuclear factor I/B) (NF-I/B) (NFI-B) (TGGCA-binding protein)	38		5|2|3|4	14	3.5	4	0|0|0|0|1|1|0|0|0|0|0|0|0|0|0|0|0|0|0|0|0|0|0|0|0|0|0|0|0|0|2|1|0|0|0|0|0|0|0|0|0|0|0|0	0.98
BRAC	O15178	ENSG00000164458	T-box	Q92925	SMRD2	SWI/SNF-related matrix-associated actin-dependent regulator of chromatin subfamily D member 2 (60 kDa BRG-1/Brm-associated factor subunit B) (BRG1-associated factor 60B) (BAF60B)	37	SWI-SNF chromatin remodeling-related-BRCA1 complex, PBAF complex (Polybromo- and BAF containing complex), BAF complex, BRG1-SIN3A complex, BRM-SIN3A complex, LARC complex (LCR-associated remodeling complex), BRM-SIN3A-HDAC complex, BRM-associated complex, EBAFb complex, EBAFa complex	18|14|18|16	66	16.5	4	8|8|7|6|5|5|6|0|4|6|2|1|1|2|2|2|1|0|1|2|1|1|1|1|1|0|5|9|2|2|4|6|0|1|3|0|2|2|0|0|8|8|4|3	0.96	X				X	X
BRAC	O15178	ENSG00000164458	T-box	Q99856	ARI3A	AT-rich interactive domain-containing protein 3A (ARID domain-containing protein 3A) (B-cell regulator of IgH transcription) (Bright) (Dead ringer-like protein 1) (E2F-binding protein 1)	37		19|16|18|21	74	18.5	4	12|11|6|6|13|11|6|5|7|6|1|1|0|0|1|0|1|0|1|1|1|1|1|2|2|1|6|5|2|1|6|4|0|0|1|2|0|0|0|0|10|5|2|0	0.92
BRAC	O15178	ENSG00000164458	T-box	Q4VC05	BCL7A	B-cell CLL/lymphoma 7 protein family member A	37		3|2|3|3	11	2.75	4	2|2|0|0|0|0|0|0|0|0|0|0|0|0|0|0|0|0|0|0|0|0|0|0|0|0|0|0|0|0|0|0|0|0|0|0|1|1|0|0|1|1|0|1	0.9
BRAC	O15178	ENSG00000164458	T-box	O75376	NCOR1	Nuclear receptor corepressor 1 (N-CoR) (N-CoR1)	37	NCOR complex, NCOR-HDAC3 complex, NCOR1 complex, NCOR2 complex, Kaiso-NCOR complex, SKI-NCOR1-SIN3A-HDAC1 complex, SMAD2-SKI-NCOR complex, SMAD3-SKI-NCOR complex, SMAD4-SKI-NCOR complex	78|71|85|79	313	78.25	4	16|19|24|11|26|13|20|11|22|11|4|2|5|1|8|3|1|0|1|2|3|1|1|2|1|2|30|31|4|4|16|20|0|0|5|3|2|4|0|0|26|18|3|2	1
BRAC	O15178	ENSG00000164458	T-box	Q9ULL5	PRR12	Proline-rich protein 12	37		11|8|15|17	51	12.75	4	0|0|0|0|0|0|0|0|0|0|0|0|0|0|0|0|0|0|0|0|0|0|0|0|0|0|1|1|0|0|2|0|0|0|0|0|0|0|1|0|0|0|0|0	1
BRAC	O15178	ENSG00000164458	T-box	Q9Y2X9	ZN281	Zinc finger protein 281 (GC-box-binding zinc finger protein 1) (Transcription factor ZBP-99) (Zinc finger DNA-binding protein 99)	37	UTX-MLL2/3 complex	9|13|18|15	55	13.75	4	8|5|3|3|4|5|4|3|6|3|0|0|0|0|0|0|1|0|0|1|1|0|0|0|0|0|8|6|0|0|4|7|0|0|0|0|1|0|0|0|3|1|0|0	0.92
BRAC	O15178	ENSG00000164458	T-box	P13056	NR2C1	Nuclear receptor subfamily 2 group C member 1 (Orphan nuclear receptor TR2) (Testicular receptor 2)	36		2|2|3|4	11	2.75	4	2|2|0|0|0|0|1|0|0|1|0|0|0|0|0|0|0|0|0|0|0|0|0|0|0|1|0|1|0|0|1|0|0|0|0|0|0|0|0|0|0|0|1|0	0.86
BRAC	O15178	ENSG00000164458	T-box	Q04726	TLE3	Transducin-like enhancer protein 3 (Enhancer of split groucho-like protein 3) (ESG3)	36	CUL4B-DDB1-TLE3 complex, TBX20-TLE3 repressor complex	42|36|36|31	145	36.25	4	15|13|12|10|8|6|15|10|17|12|3|0|2|2|3|2|3|0|1|2|0|0|2|1|3|1|3|3|4|4|13|8|2|0|4|1|7|6|0|0|10|6|6|7	0.99
BRAC	O15178	ENSG00000164458	T-box	Q09472	EP300	Histone acetyltransferase p300 (p300 HAT) (EC 2.3.1.48) (E1A-associated protein p300) (Histone butyryltransferase p300) (EC 2.3.1.-) (Histone crotonyltransferase p300) (EC 2.3.1.-) (Protein propionyltransferase p300) (EC 2.3.1.-)	35	Multisubunit ACTR coactivator complex, p300-MDM2-p53 protein complex, p300-CBP-p270-SWI/SNF complex, p300-CBP-p270 complex, p33ING1b-p300 complex, ING1-p300-PCNA complex, pRb2/p130-multimolecular complex (RB2, E2F5, HDAC1, SUV39H1, P300), p300-SMAD1-STAT3 complex, PIAS3-SMAD3-P300 complex, HES1 promoter corepressor complex, HES1 promoter-Notch enhancer complex, SMAD1-P300 complex, Smad1-Notch1-p3…	10|9|13|12	44	11	4	1|0|0|0|0|0|1|2|0|0|0|0|0|0|0|0|0|0|0|0|0|0|0|0|0|0|0|0|0|0|2|0|0|0|0|0|0|0|0|0|0|0|0|0	1
BRAC	O15178	ENSG00000164458	T-box	Q9H334	FOXP1	Forkhead box protein P1 (Mac-1-regulated forkhead) (MFH)	35		2|2|6|2	12	3	4	1|2|0|0|0|0|1|0|0|0|0|0|0|0|0|0|0|0|0|0|0|0|0|0|0|0|1|2|0|0|2|1|0|0|0|0|0|0|0|0|0|0|0|0	0.8
BRAC	O15178	ENSG00000164458	T-box	Q9ULD9	ZN608	Zinc finger protein 608 (Renal carcinoma antigen NY-REN-36)	35		5|7|10|10	32	8	4	2|1|0|0|0|1|2|0|2|1|0|0|0|0|0|0|0|0|0|0|0|0|0|0|0|1|2|2|0|0|2|1|0|0|0|0|0|0|0|0|1|0|0|0	1
BRAC	O15178	ENSG00000164458	T-box	P54253	ATX1	Ataxin-1 (Spinocerebellar ataxia type 1 protein)	34		3|8|9|8	28	7	4	1|1|1|0|0|0|0|0|0|0|0|0|0|0|0|0|0|0|0|0|0|0|0|0|0|0|0|1|0|0|0|0|0|0|0|0|0|0|0|0|0|1|0|0	1
BRAC	O15178	ENSG00000164458	T-box	Q9Y6Q9	NCOA3	Nuclear receptor coactivator 3 (NCoA-3) (EC 2.3.1.48) (ACTR) (Amplified in breast cancer 1 protein) (AIB-1) (CBP-interacting protein) (pCIP) (Class E basic helix-loop-helix protein 42) (bHLHe42) (Receptor-associated coactivator 3) (RAC-3) (Steroid receptor coactivator protein 3) (SRC-3) (Thyroid hormone receptor activator molecule 1) (TRAM-1)	34	Multisubunit ACTR coactivator complex, ESR1-RELA-BCL3-NCOA3 complex, IKK-alpha--ER-alpha-AIB1 complex, SRC-3 complex, RSmad complex, MAK-ACTR-AR complex	13|10|12|10	45	11.25	4	2|2|0|0|0|0|0|0|0|0|0|0|0|0|0|0|0|0|0|0|0|0|0|0|0|0|1|2|0|0|3|2|0|0|0|0|1|0|0|0|0|0|0|0	1
BRAC	O15178	ENSG00000164458	T-box	O60907	TBL1X	F-box-like/WD repeat-containing protein TBL1X (SMAP55) (Transducin beta-like protein 1X) (Transducin-beta-like protein 1, X-linked)	33	NCOR complex, SMRT complex, NCOR-HDAC3 complex, SMRT core complex, SMRT core complex, Ubiquitin E3 ligase (SIAH1, SIP, SKP1A, TBL1X), Kaiso-NCOR complex	16|15|14|13	58	14.5	4	12|10|7|4|9|3|10|5|10|6|0|0|4|0|0|0|0|0|0|0|0|0|0|2|0|5|1|0|0|0|7|5|0|0|0|0|0|0|0|0|7|0|0|0	0.88
BRAC	O15178	ENSG00000164458	T-box	O15164	TIF1A	Transcription intermediary factor 1-alpha (TIF1-alpha) (EC 2.3.2.27) (E3 ubiquitin-protein ligase TRIM24) (RING finger protein 82) (RING-type E3 ubiquitin transferase TIF1-alpha) (Tripartite motif-containing protein 24)	33		2|7|6|5	20	5	4	4|1|1|0|1|0|1|1|3|0|0|0|0|0|0|0|0|0|0|0|0|0|0|0|0|0|0|0|0|0|2|2|0|0|0|0|0|0|0|0|0|0|0|0	0.88
BRAC	O15178	ENSG00000164458	T-box	O95785	WIZ	Protein Wiz (Widely-interspaced zinc finger-containing protein) (Zinc finger protein 803)	33		12|10|14|16	52	13	4	8|10|3|3|3|5|9|2|10|2|0|0|0|0|0|0|0|0|0|0|0|0|0|0|0|0|11|6|0|0|6|9|0|0|0|0|1|1|0|0|1|4|0|0	0.86
BRAC	O15178	ENSG00000164458	T-box	Q6PJG2	EMSA1	ELM2 and SANT domain-containing protein 1 (MIDEAS)	32	MiDAC complex	12|6|8|10	36	9	4	0|0|0|0|0|0|0|0|0|0|0|1|0|0|1|0|1|0|3|1|1|2|1|1|0|0|0|0|0|0|0|0|0|0|0|0|0|0|0|0|0|0|0|0	1
BRAC	O15178	ENSG00000164458	T-box	Q92793	CBP	CREB-binding protein (EC 2.3.1.48)	31	Multisubunit ACTR coactivator complex, p300-CBP-p270-SWI/SNF complex, p300-CBP-p270 complex, HES1 promoter corepressor complex, CREBBP-KAT2B-MYOD1 complex, SRC-3 complex, SRC-1 complex, RSmad complex, SMAD1-CBP complex, RNA polymerase II complex (CBP, PCAF, RPB1, BAF47, CYCC, CDK8), chromatin structure modifying, RNA polymerase II complex, incomplete (CBP, RPBI, PCAF, BAF47), chromatin structure …	12|12|12|13	49	12.25	4	0|3|0|0|0|0|0|0|4|0|0|0|0|0|1|1|1|0|0|0|0|0|0|0|0|0|0|0|0|0|0|1|0|0|0|0|0|0|0|0|0|0|0|0	1
BRAC	O15178	ENSG00000164458	T-box	Q86UP3	ZFHX4	Zinc finger homeobox protein 4 (Zinc finger homeodomain protein 4) (ZFH-4)	31		6|5|9|8	28	7	4	0|0|1|0|1|0|0|0|0|0|2|2|2|1|0|0|0|0|0|0|0|0|0|0|0|0|1|3|1|0|1|2|0|0|0|0|1|0|0|0|0|0|0|0	0.99
BRAC	O15178	ENSG00000164458	T-box	Q9NQB0	TF7L2	Transcription factor 7-like 2 (HMG box transcription factor 4) (T-cell-specific transcription factor 4) (T-cell factor 4) (TCF-4) (hTCF-4)	30	Bipartite complex (TFC4, CTNNB1)	3|4|4|3	14	3.5	4	2|0|0|0|0|0|0|0|0|0|0|0|0|0|0|0|0|0|0|0|0|0|0|0|0|0|0|0|0|0|0|0|0|0|0|0|0|0|0|0|0|0|0|0	0.99	X				X	X
BRAC	O15178	ENSG00000164458	T-box	Q5PSV4	BRM1L	Breast cancer metastasis-suppressor 1-like protein (BRMS1-homolog protein p40) (BRMS1-like protein p40)	29	ING2 complex	8|7|10|10	35	8.75	4	2|5|2|1|2|5|1|0|1|1|0|0|0|0|0|0|1|0|0|0|0|0|0|0|0|0|2|4|0|0|0|0|0|0|1|1|1|1|0|0|3|5|2|2	0.95
BRAC	O15178	ENSG00000164458	T-box	Q9NP66	HM20A	High mobility group protein 20A (HMG box-containing protein 20A) (HMG domain-containing protein 1) (HMG domain-containing protein HMGX1)	29	LSD1 complex	10|4|5|3	22	5.5	4	2|2|2|1|3|1|2|3|2|2|0|0|0|0|0|0|0|0|0|0|0|0|0|0|0|0|2|2|0|0|0|2|0|0|0|0|0|1|0|0|1|1|0|0	0.83
BRAC	O15178	ENSG00000164458	T-box	Q7Z3K3	POGZ	Pogo transposable element with ZNF domain (Suppressor of hairy wing homolog 5) (Zinc finger protein 280E) (Zinc finger protein 635)	29		8|6|8|7	29	7.25	4	1|1|2|0|2|0|0|0|1|2|1|1|1|1|0|0|0|0|0|0|0|0|0|0|0|0|2|4|1|0|0|1|0|0|0|0|0|0|0|0|2|2|0|0	0.99
BRAC	O15178	ENSG00000164458	T-box	Q86U70	LDB1	LIM domain-binding protein 1 (LDB-1) (Carboxyl-terminal LIM domain-binding protein 2) (CLIM-2) (LIM domain-binding factor CLIM2) (hLdb1) (Nuclear LIM interactor)	28	E-box sequence-binding complex, Rb-tal-1-E2A-Lmo2-Ldb1 complex, LMO4-BRCA1-CTIP-LDB1 complex	5|4|5|2	16	4	4	0|0|0|0|0|0|0|0|0|0|0|0|0|0|0|0|0|0|0|0|0|0|0|0|0|0|0|0|0|0|0|0|0|0|0|0|0|0|0|0|0|0|0|0	0.98
BRAC	O15178	ENSG00000164458	T-box	Q8TE76	MORC4	MORC family CW-type zinc finger protein 4 (Zinc finger CW-type coiled-coil domain protein 2) (Zinc finger CW-type domain protein 4)	28		3|3|4|6	16	4	4	0|0|0|0|0|0|0|0|0|0|0|0|0|0|0|0|0|0|0|0|0|0|0|0|0|0|0|0|0|0|0|0|0|0|0|0|0|0|1|0|0|0|0|0	0.99
BRAC	O15178	ENSG00000164458	T-box	Q8WUZ0	BCL7C	B-cell CLL/lymphoma 7 protein family member C	27		2|4|2|5	13	3.25	4	1|0|0|0|0|0|1|0|0|0|0|0|0|0|0|0|0|0|0|0|0|0|0|0|0|0|1|2|0|0|0|0|0|0|0|0|0|0|0|0|0|0|0|0	0.96
BRAC	O15178	ENSG00000164458	T-box	Q9HCM7	FBSL	Fibrosin-1-like protein (AUTS2-like protein) (HBV X-transactivated gene 9 protein) (HBV XAg-transactivated protein 9)	26		4|3|3|3	13	3.25	4	0|1|0|0|0|0|2|0|0|0|0|0|0|0|0|0|0|0|0|0|0|0|0|0|0|0|0|0|0|0|0|0|0|0|0|0|0|0|0|0|0|0|0|0	1
BRAC	O15178	ENSG00000164458	T-box	Q12948	FOXC1	Forkhead box protein C1 (Forkhead-related protein FKHL7) (Forkhead-related transcription factor 3) (FREAC-3)	26		5|7|5|5	22	5.5	4	3|4|0|0|0|0|0|0|0|0|0|0|0|0|0|0|0|0|0|0|0|0|0|0|0|0|1|1|0|0|2|2|0|0|0|0|0|1|0|0|1|0|0|0	0.96
BRAC	O15178	ENSG00000164458	T-box	Q01826	SATB1	DNA-binding protein SATB1 (Special AT-rich sequence-binding protein 1)	26		8|7|7|8	30	7.5	4	8|5|3|0|0|0|6|3|6|3|1|1|1|0|0|1|0|0|0|0|0|0|0|0|0|0|3|2|0|0|6|2|0|0|0|0|0|0|0|0|5|3|0|0	0.8
BRAC	O15178	ENSG00000164458	T-box	Q6KC79	NIPBL	Nipped-B-like protein (Delangin) (SCC2 homolog)	25		2|3|10|5	20	5	4	0|0|0|0|0|0|0|0|0|0|0|0|0|0|0|0|0|0|0|0|0|0|0|1|0|0|2|4|0|0|3|4|0|0|0|0|0|0|0|0|2|0|0|0	0.84
BRAC	O15178	ENSG00000164458	T-box	Q06587	RING1	E3 ubiquitin-protein ligase RING1 (EC 2.3.2.27) (Polycomb complex protein RING1) (RING finger protein 1) (RING-type E3 ubiquitin transferase RING1) (Really interesting new gene 1 protein)	25	Polycomb repressive complex 1 (PRC1, hPRC-H), Polycomb repressive complex 1 (PRC1, hPRC-H), CEN complex, BCOR complex, E2F-6 complex, hPRC1L complex, RBP-Jkappa-RING1-KyoT2 complex, Polycomb repressive complex	12|14|17|12	55	13.75	4	9|11|3|0|0|0|10|2|7|5|0|0|0|0|2|1|1|0|1|2|0|2|0|0|1|0|2|4|0|0|0|6|0|0|2|0|0|3|0|0|3|3|0|0	0.92
BRAC	O15178	ENSG00000164458	T-box	O60315	ZEB2	Zinc finger E-box-binding homeobox 2 (Smad-interacting protein 1) (SMADIP1) (Zinc finger homeobox protein 1b)	25	CtBP complex, ZEB2-KDM1A complex	4|4|3|3	14	3.5	4	0|0|0|0|0|0|0|0|0|0|0|0|0|0|0|0|0|0|0|0|0|0|0|0|0|0|0|0|0|0|0|0|0|0|0|0|0|0|0|0|0|0|0|0	0.99
BRAC	O15178	ENSG00000164458	T-box	Q9UQR1	ZN148	Zinc finger protein 148 (Transcription factor ZBP-89) (Zinc finger DNA-binding protein 89)	25		4|2|2|4	12	3	4	0|2|1|0|0|0|1|1|1|1|0|0|0|0|1|0|0|0|0|0|0|0|0|0|0|0|2|1|0|0|1|4|0|0|0|0|0|0|0|0|0|1|0|0	0.74
BRAC	O15178	ENSG00000164458	T-box	Q9H0E3	SP130	Histone deacetylase complex subunit SAP130 (130 kDa Sin3-associated polypeptide) (Sin3-associated polypeptide p130)	24	SAP complex (Sin3-associated protein complex), SAP complex (Sin3-associated protein complex), SIN3-SAP25 complex, SIN3-SAP25 complex, ING2 complex, Emerin complex 24, Emerin complex 25, STAGA complex, SPT3-linked	10|10|9|14	43	10.75	4	4|3|7|2|7|3|3|1|3|3|2|1|2|1|1|1|2|0|0|1|2|3|1|3|0|0|5|4|2|3|5|3|0|1|0|0|1|1|0|0|4|3|1|3	0.95
BRAC	O15178	ENSG00000164458	T-box	P39880	CUX1	Homeobox protein cut-like 1 (CCAAT displacement protein) (CDP) (Homeobox protein cux-1)	23		29|19|36|38	122	30.5	4	12|15|12|10|21|12|15|8|16|11|0|0|0|0|0|0|1|1|0|0|0|0|0|0|0|2|14|19|2|0|7|12|0|0|2|3|0|5|0|0|10|12|0|0	0.88
BRAC	O15178	ENSG00000164458	T-box	Q9HAH7	FBRS	Probable fibrosin-1	23		4|3|2|2	11	2.75	4	1|0|0|0|0|0|0|0|1|0|0|0|0|0|0|0|0|0|0|0|0|0|0|0|0|0|1|1|0|0|1|1|0|0|0|0|0|0|0|0|0|0|0|0	0.95
BRAC	O15178	ENSG00000164458	T-box	Q9P2K3	RCOR3	REST corepressor 3	23	LSD1 complex, CtBP complex	20|17|19|13	69	17.25	4	9|10|9|7|10|6|11|4|9|8|0|0|0|0|0|0|0|0|0|0|0|0|0|0|0|0|4|5|0|0|2|3|0|0|0|0|0|0|0|0|6|5|0|0	0.92
BRAC	O15178	ENSG00000164458	T-box	O15090	ZN536	Zinc finger protein 536	23		6|3|7|5	21	5.25	4	0|0|0|0|0|0|0|0|0|0|0|0|0|0|0|0|0|0|0|0|0|0|0|0|0|0|0|0|0|0|0|0|0|0|0|0|0|0|0|0|0|0|0|0	1
BRAC	O15178	ENSG00000164458	T-box	Q2KHR3	QSER1	Glutamine and serine-rich protein 1	22		7|5|5|6	23	5.75	4	3|4|2|2|0|0|0|0|2|2|0|0|0|0|0|1|0|0|0|0|0|0|0|0|0|0|4|2|0|1|3|4|0|0|0|0|0|0|0|0|1|1|0|0	0.88
BRAC	O15178	ENSG00000164458	T-box	Q9BWW4	SSBP3	Single-stranded DNA-binding protein 3 (Sequence-specific single-stranded-DNA-binding protein)	22		5|5|6|4	20	5	4	0|1|0|0|0|0|0|0|0|0|0|0|0|0|0|0|0|0|0|0|1|0|0|0|0|0|0|0|0|0|0|0|0|0|0|0|0|0|0|0|0|0|0|0	1
BRAC	O15178	ENSG00000164458	T-box	Q15596	NCOA2	Nuclear receptor coactivator 2 (NCoA-2) (Class E basic helix-loop-helix protein 75) (bHLHe75) (Transcriptional intermediary factor 2) (hTIF2)	21	SRC-3 complex, SRC-1 complex	14|19|11|14	58	14.5	4	11|9|2|2|3|3|7|1|9|5|1|1|1|1|0|0|0|0|0|0|0|0|0|0|0|0|8|6|1|1|4|5|0|0|1|0|0|0|0|0|0|0|1|0	0.92
BRAC	O15178	ENSG00000164458	T-box	Q9NP50	SHCAF	SIN3-HDAC complex-associated factor (Protein FAM60A) (Tera protein homolog)	21		4|3|5|6	18	4.5	4	3|1|1|1|1|1|3|1|3|1|1|0|0|0|0|1|1|0|0|1|1|0|0|0|0|0|0|2|0|0|0|2|0|0|1|0|0|0|0|0|2|2|0|0	0.84
BRAC	O15178	ENSG00000164458	T-box	Q5VZL5	ZMYM4	Zinc finger MYM-type protein 4 (Zinc finger protein 262)	21		26|30|43|42	141	35.25	4	4|3|8|3|8|1|5|0|4|0|0|0|0|0|0|1|1|0|0|0|0|0|0|0|0|0|7|10|1|1|12|16|1|1|5|4|0|2|0|0|10|8|2|3	0.99
BRAC	O15178	ENSG00000164458	T-box	Q9H7S9	ZN703	Zinc finger protein 703 (Zinc finger elbow-related proline domain protein 1)	20		2|3|4|4	13	3.25	4	0|0|0|0|0|0|0|0|0|0|0|0|0|0|0|0|0|0|0|0|0|0|0|0|0|0|0|0|0|0|0|0|0|0|0|0|0|0|0|0|0|0|0|0	0.98	X				X
BRAC	O15178	ENSG00000164458	T-box	Q15291	RBBP5	Retinoblastoma-binding protein 5 (RBBP-5) (Retinoblastoma-binding protein RBQ-3)	20	Menin-associated histone methyltransferase complex, MLL-HCF complex, ALL-1 supercomplex, WDR5-ASH2L-RBBP5-MLL2 complex, ASCOM complex, MOF complex, Set1B complex, Set1A complex, UTX-MLL2/3 complex, PTIP-HMT complex, MLL1-WDR5 complex, PITX2-MLL4-ASH2L-RBBP5-PTIP complex, MLL1 core complex, MLL2 complex, MLL3 complex, MLL1 complex, MLL4 complex, Set1A complex, Set1B complex, CUL4A-DDB1-RBBP5 compl…	10|9|13|12	44	11	4	6|6|6|4|9|6|5|3|4|4|2|0|0|0|1|1|4|0|0|0|1|0|0|0|0|1|2|3|0|0|4|3|0|0|0|1|0|0|0|0|2|0|0|2	0.89
BRAC	O15178	ENSG00000164458	T-box	P50219	MNX1	Motor neuron and pancreas homeobox protein 1 (Homeobox protein HB9)	19		2|2|2|2	8	2	4	0|0|0|0|0|0|0|0|1|0|0|0|0|0|0|0|0|0|0|0|0|0|0|0|0|0|0|0|0|0|0|0|0|0|0|0|0|0|0|0|0|0|0|0	0.94	X				X	X
BRAC	O15178	ENSG00000164458	T-box	Q13227	GPS2	G protein pathway suppressor 2 (GPS-2)	19	NCOR complex, SMRT complex, MSH4-MSH5-GPS2 complex, NCOR-HDAC3 complex, Kaiso-NCOR complex	3|3|4|5	15	3.75	4	2|1|1|0|0|0|2|0|1|0|0|0|0|0|0|0|0|0|0|0|0|0|0|0|0|0|0|1|0|0|0|0|0|0|0|0|0|0|0|0|0|0|0|0	0.97
BRAC	O15178	ENSG00000164458	T-box	Q9P0W2	HM20B	SWI/SNF-related matrix-associated actin-dependent regulator of chromatin subfamily E member 1-related (SMARCE1-related protein) (BRCA2-associated factor 35) (HMG box-containing protein 20B) (HMG domain-containing protein 2) (HMG domain-containing protein HMGX2) (Sox-like transcriptional factor) (Structural DNA-binding protein BRAF35)	19	CoREST-HDAC complex, LSD1 complex, Anti-HDAC2 complex, anti-BHC110 complex, BHC complex, BRAF53-BRCA2 complex, BHC110 complex, 17S U2 snRNP	5|3|4|4	16	4	4	0|0|1|0|2|0|0|0|1|0|0|0|0|1|0|0|0|0|0|0|0|0|0|0|0|0|0|0|0|0|0|0|0|0|0|0|0|0|0|0|0|0|0|0	0.99
BRAC	O15178	ENSG00000164458	T-box	Q04727	TLE4	Transducin-like enhancer protein 4 (Grg-4) (Groucho-related protein 4)	19	OCT2-TLE4 complex	13|15|13|14	55	13.75	4	0|0|0|0|0|0|0|0|0|0|0|0|0|0|0|0|0|0|0|0|0|0|0|0|0|0|0|0|0|0|0|0|0|0|0|0|0|0|0|0|0|0|0|0	1
BRAC	O15178	ENSG00000164458	T-box	Q92922	SMRC1	SWI/SNF complex subunit SMARCC1 (BRG1-associated factor 155) (BAF155) (SWI/SNF complex 155 kDa subunit) (SWI/SNF-related matrix-associated actin-dependent regulator of chromatin subfamily C member 1)	18	NUMAC complex (nucleosomal methylation activator complex), PBAF complex (Polybromo- and BAF containing complex), BAF complex, SWI-SNF chromatin remodeling-related-BRCA1 complex, PBAF complex (Polybromo- and BAF containing complex), BAF complex, PBAF complex (Polybromo- and BAF containing complex), BAF complex, PBAF complex (Polybromo- and BAF containing complex), BAF complex, p300-CBP-p270-SWI/SN…	66|59|67|68	260	65	4	32|38|33|20|39|30|32|17|29|29|19|5|2|4|12|17|18|2|4|9|8|12|10|13|0|0|13|12|4|5|16|17|2|2|19|9|6|5|0|0|25|22|9|7	0.96
BRAC	O15178	ENSG00000164458	T-box	Q15532	SSXT	Protein SSXT (Protein SYT) (Synovial sarcoma translocated to X chromosome protein)	18		4|2|4|2	12	3	4	0|1|1|0|2|0|1|0|1|0|0|0|0|0|0|0|0|0|0|0|0|0|0|1|0|0|1|1|0|0|1|1|0|0|0|1|0|0|0|0|1|0|0|0	0.82
BRAC	O15178	ENSG00000164458	T-box	P61962	DCAF7	DDB1- and CUL4-associated factor 7 (WD repeat-containing protein 68) (WD repeat-containing protein An11 homolog)	17		7|9|8|9	33	8.25	4	5|4|4|4|3|3|6|3|9|4|2|2|1|2|1|1|0|0|0|0|0|0|0|0|2|2|4|3|2|1|2|4|2|3|0|0|6|1|2|0|1|0|0|1	0.74
BRAC	O15178	ENSG00000164458	T-box	Q92585	MAML1	Mastermind-like protein 1 (Mam-1)	17	HES1 promoter-Notch enhancer complex, RBPJ-NOTCH1-MAML1 complex, RBPJ-NOTCH1-MAML1 complex, RBPJ-NOTCH1-MAML1 complex	5|7|4|5	21	5.25	4	4|5|0|0|0|0|2|0|4|0|0|0|0|0|0|0|0|0|0|0|0|0|0|0|0|1|6|3|0|0|4|2|0|0|0|0|0|1|0|0|0|0|0|0	0.81
BRAC	O15178	ENSG00000164458	T-box	Q8N488	RYBP	RING1 and YY1-binding protein (Apoptin-associating protein 1) (APAP-1) (Death effector domain-associated factor) (DED-associated factor) (YY1 and E4TF1-associated factor 1)	16	BCOR complex	2|2|3|2	9	2.25	4	0|0|0|0|0|0|0|0|2|0|0|0|0|0|0|0|0|0|0|0|0|0|0|0|0|0|1|0|0|0|0|0|0|0|0|0|0|0|0|0|0|0|0|0	0.96
BRAC	O15178	ENSG00000164458	T-box	Q9UIU6	SIX4	Homeobox protein SIX4 (Sine oculis homeobox homolog 4)	16		2|3|3|2	10	2.5	4	2|4|0|0|0|0|1|0|1|1|0|0|0|0|0|0|0|0|0|0|0|0|0|0|0|0|1|0|0|0|0|1|0|0|0|0|0|0|0|0|0|0|0|0	0.8
BRAC	O15178	ENSG00000164458	T-box	Q8TAQ2	SMRC2	SWI/SNF complex subunit SMARCC2 (BRG1-associated factor 170) (BAF170) (SWI/SNF complex 170 kDa subunit) (SWI/SNF-related matrix-associated actin-dependent regulator of chromatin subfamily C member 2)	14	NUMAC complex (nucleosomal methylation activator complex), PBAF complex (Polybromo- and BAF containing complex), BAF complex, SWI-SNF chromatin remodeling-related-BRCA1 complex, PBAF complex (Polybromo- and BAF containing complex), BAF complex, PBAF complex (Polybromo- and BAF containing complex), BAF complex, PBAF complex (Polybromo- and BAF containing complex), BAF complex, p300-CBP-p270-SWI/SN…	57|54|50|59	220	55	4	31|29|33|21|42|26|32|13|31|22|10|3|1|2|12|10|18|2|6|7|7|10|7|9|4|3|12|19|1|4|15|16|0|2|13|11|7|10|0|0|31|28|5|5	0.87
BRAC	O15178	ENSG00000164458	T-box	Q12824	SNF5	SWI/SNF-related matrix-associated actin-dependent regulator of chromatin subfamily B member 1 (BRG1-associated factor 47) (BAF47) (Integrase interactor 1 protein) (SNF5 homolog) (hSNF5)	14	NUMAC complex (nucleosomal methylation activator complex), PBAF complex (Polybromo- and BAF containing complex), BAF complex, SWI-SNF chromatin remodeling-related-BRCA1 complex, PBAF complex (Polybromo- and BAF containing complex), BAF complex, PBAF complex (Polybromo- and BAF containing complex), BAF complex, PBAF complex (Polybromo- and BAF containing complex), BAF complex, p300-CBP-p270-SWI/SN…	22|20|21|16	79	19.75	4	12|12|15|9|16|10|13|7|10|8|2|1|1|0|4|2|5|1|1|1|1|2|1|1|0|3|3|4|2|3|7|9|0|0|2|2|2|5|0|0|9|6|2|2	0.83
BRAC	O15178	ENSG00000164458	T-box	Q9UGU0	TCF20	Transcription factor 20 (TCF-20) (Nuclear factor SPBP) (Protein AR1) (Stromelysin-1 PDGF-responsive element-binding protein) (SPRE-binding protein)	14		6|7|2|3	18	4.5	4	1|1|0|0|0|0|1|0|1|0|0|0|0|0|0|0|0|0|0|0|0|0|0|0|0|0|2|5|0|0|1|3|0|0|0|0|0|1|0|0|0|0|0|0	0.84
BRAC	O15178	ENSG00000164458	T-box	P51532	SMCA4	Transcription activator BRG1 (EC 3.6.4.-) (ATP-dependent helicase SMARCA4) (BRG1-associated factor 190A) (BAF190A) (Mitotic growth and transcription activator) (Protein BRG-1) (Protein brahma homolog 1) (SNF2-beta) (SWI/SNF-related matrix-associated actin-dependent regulator of chromatin subfamily A member 4)	13	NUMAC complex (nucleosomal methylation activator complex), PBAF complex (Polybromo- and BAF containing complex), BAF complex, SWI-SNF chromatin remodeling-related-BRCA1 complex, PBAF complex (Polybromo- and BAF containing complex), BAF complex, PBAF complex (Polybromo- and BAF containing complex), PBAF complex (Polybromo- and BAF containing complex), BAF complex, p300-CBP-p270-SWI/SNF complex, Br…	52|57|62|62	233	58.25	4	36|38|39|20|45|24|36|12|37|19|4|3|2|0|8|5|9|2|4|3|5|4|4|4|4|6|22|23|10|8|19|22|0|2|8|8|6|15|0|0|38|40|13|22	0.74	X				X	X
BRAC	O15178	ENSG00000164458	T-box	Q9BQE9	BCL7B	B-cell CLL/lymphoma 7 protein family member B (allergen Hom s 3)	13		2|2|2|3	9	2.25	4	0|0|1|1|1|1|0|0|0|0|0|0|0|0|0|1|0|0|0|0|0|0|0|0|0|0|2|2|0|0|0|0|0|0|0|0|0|0|0|0|0|0|0|0	0.81
BRAC	O15178	ENSG00000164458	T-box	Q7Z5L9	I2BP2	Interferon regulatory factor 2-binding protein 2 (IRF-2-binding protein 2) (IRF-2BP2)	13	IRF2BP2-IRF2BP1-IRF2BPL complex	17|14|13|12	56	14	4	15|14|7|3|4|0|10|3|9|9|1|1|2|2|0|1|0|0|0|0|1|1|0|0|1|1|4|4|1|5|9|9|0|0|0|0|0|0|0|0|5|3|0|1	0.81
BRAC	O15178	ENSG00000164458	T-box	Q9UK53	ING1	Inhibitor of growth protein 1	13	SIN3-ING1b complex I, SIN3-ING1b complex II, p33ING1b-PCNA complex, p33ING1b-p300 complex, p33ING1b-HDAC1 complex, ING1-p300-PCNA complex, ING1-PCNA complex	2|2|2|2	8	2	4	0|1|0|1|2|1|0|0|0|0|0|0|0|0|0|0|0|0|0|0|0|0|0|1|0|0|1|1|0|0|0|0|0|0|0|1|0|0|0|0|1|0|0|0	0.74
BRAC	O15178	ENSG00000164458	T-box	Q14686	NCOA6	Nuclear receptor coactivator 6 (Activating signal cointegrator 2) (ASC-2) (Amplified in breast cancer protein 3) (Cancer-amplified transcriptional coactivator ASC-2) (Nuclear receptor coactivator RAP250) (NRC RAP250) (Nuclear receptor-activating protein, 250 kDa) (Peroxisome proliferator-activated receptor-interacting protein) (PPAR-interacting protein) (PRIP) (Thyroid hormone receptor-binding pr…	13	DICER1-NCOA6-AGO2 complex, ASCOM complex, UTX-MLL2/3 complex, NCOA6-DNA-PK-Ku-PARP1 complex, PTIP-HMT complex, MLL3 complex, MLL4 complex	33|31|33|28	125	31.25	4	14|12|8|5|12|6|15|2|12|8|1|1|2|0|3|4|2|0|0|0|0|0|0|0|2|3|14|13|6|9|13|17|0|1|4|4|2|8|0|0|7|10|5|2	0.97
BRAC	O15178	ENSG00000164458	T-box	Q9BTK6	PAGR1	PAXIP1-associated glutamate-rich protein 1 (Glutamate-rich coactivator interacting with SRC1) (GAS) (PAXIP1-associated protein 1) (PTIP-associated protein 1)	13	PTIP-HMT complex, MLL3 complex, MLL4 complex	5|6|5|5	21	5.25	4	0|0|0|0|0|0|0|0|0|0|0|0|0|0|0|0|0|0|0|0|0|0|0|0|0|0|0|0|0|0|0|0|0|0|0|0|0|0|0|0|0|0|0|0	1
BRAC	O15178	ENSG00000164458	T-box	Q9UKL0	RCOR1	REST corepressor 1 (Protein CoREST)	13	CoREST-HDAC complex, LSD1-CoREST complex, LSD1 complex, Anti-HDAC2 complex, anti-BHC110 complex, BHC complex, CtBP complex, CtBP core complex, HDAC1-associated protein complex, HDAC1-associated core complex cI, HDAC1-associated core complex cII, BRAF53-BRCA2 complex, REST-CoREST-mSIN3A complex, CoREST-HDAC2 complex, BHC110 complex, Emerin complex 32	27|28|24|22	101	25.25	4	16|17|14|9|15|13|14|9|15|13|6|2|2|2|3|3|3|1|4|4|2|2|3|3|0|1|8|8|3|4|5|7|1|2|2|3|7|7|0|0|10|12|5|6	0.87
BRAC	O15178	ENSG00000164458	T-box	Q9Y5A6	ZSC21	Zinc finger and SCAN domain-containing protein 21 (Renal carcinoma antigen NY-REN-21) (Zinc finger protein 38 homolog) (Zfp-38)	12		5|4|4|3	16	4	4	0|0|0|0|0|0|0|0|2|0|0|0|0|0|0|0|0|0|0|0|0|0|1|0|0|0|1|0|0|0|5|6|0|0|0|0|0|0|0|0|0|0|0|0	0.89
BRAC	O15178	ENSG00000164458	T-box	O75177	CREST	Calcium-responsive transactivator (SS18-like protein 1) (SYT homolog 1)	11		3|3|2|3	11	2.75	4	0|0|0|0|0|0|0|0|0|0|0|0|0|0|0|0|0|0|0|0|0|0|0|0|0|0|0|0|0|0|0|0|0|0|0|0|0|0|0|0|0|0|0|0	0.98
BRAC	O15178	ENSG00000164458	T-box	Q8IY57	YAF2	YY1-associated factor 2	11	E2F-6 complex	4|5|4|3	16	4	4	2|2|2|0|4|0|2|0|2|1|2|2|2|2|0|0|0|0|1|2|1|1|0|1|0|0|0|1|0|0|1|1|0|0|0|0|0|0|0|0|1|0|0|0	0.76
BRAC	O15178	ENSG00000164458	T-box	Q8IX15	HOMEZ	Homeobox and leucine zipper protein Homez (Homeodomain leucine zipper-containing factor)	10		4|2|5|3	14	3.5	4	0|0|0|0|0|0|0|1|1|2|0|0|0|0|0|0|0|0|0|0|0|0|0|0|0|0|0|0|0|0|0|0|0|0|0|0|0|0|0|0|0|0|0|0	0.98
BRAC	O15178	ENSG00000164458	T-box	Q9H160	ING2	Inhibitor of growth protein 2 (Inhibitor of growth 1-like protein) (ING1Lp) (p32) (p33ING2)	10	ING2 complex	2|2|2|4	10	2.5	4	0|0|0|0|0|0|0|0|0|0|0|0|0|0|0|0|0|0|0|0|0|0|0|0|0|0|1|1|0|0|0|0|0|0|0|0|0|0|0|0|0|0|0|0	0.95
BRAC	O15178	ENSG00000164458	T-box	P81877	SSBP2	Single-stranded DNA-binding protein 2 (Sequence-specific single-stranded-DNA-binding protein 2)	9		3|3|4|3	13	3.25	4	0|0|0|0|0|0|0|0|0|0|0|0|0|0|0|0|0|0|0|0|0|0|0|0|0|0|0|0|0|0|0|0|0|0|0|0|0|0|0|0|0|0|0|0	0.99
BRAC	O15178	ENSG00000164458	T-box	P46937	YAP1	Transcriptional coactivator YAP1 (Yes-associated protein 1) (Protein yorkie homolog) (Yes-associated protein YAP65 homolog)	9	SETD7-YAP-AXIN1-beta-catenin complex, WWTR1-YAP1 complex, CTNNB1-TBX5-YAP1 complex	6|2|3|3	14	3.5	4	0|0|0|0|0|0|0|0|0|0|0|0|0|0|0|0|0|0|0|0|0|0|0|0|0|0|0|0|0|0|0|0|0|0|0|0|0|0|0|0|0|0|0|0	0.98
BRAC	O15178	ENSG00000164458	T-box	Q6NUN9	ZN746	Zinc finger protein 746 (Parkin-interacting substrate) (PARIS)	9		6|6|5|4	21	5.25	4	0|0|0|0|0|0|0|0|0|0|0|0|1|0|0|0|0|0|0|0|0|0|0|0|0|0|0|0|0|0|0|0|0|0|0|0|0|0|0|0|0|0|0|0	1
BRAC	O15178	ENSG00000164458	T-box	O15379	HDAC3	Histone deacetylase 3 (HD3) (EC 3.5.1.98) (RPD3-2) (SMAP45)	7	NCOR complex, SMRT complex, NCOR-HDAC3 complex, SMRT core complex, SMRT core complex, NCOR1 complex, NCOR2 complex, Kaiso-NCOR complex, ANCO1-HDAC3 complex, Emerin regulatory complex, Emerin complex 32, AJUBA-GFI1-HDAC3 complex	17|21|14|19	71	17.75	4	14|16|9|3|8|2|17|9|16|11|0|0|0|0|0|0|3|0|0|0|0|0|0|0|2|1|5|3|0|1|6|6|1|0|0|0|3|4|0|0|6|4|2|1	0.84
BRAC	O15178	ENSG00000164458	T-box	O60341	KDM1A	Lysine-specific histone demethylase 1A (EC 1.-.-.-) (BRAF35-HDAC complex protein BHC110) (Flavin-containing amine oxidase domain-containing protein 2)	7	NRD complex (Nucleosome remodeling and deacetylation complex), CoREST-HDAC complex, LSD1-CoREST complex, LSD1 complex, Anti-HDAC2 complex, anti-BHC110 complex, XFIM complex, BHC complex, CtBP complex, CtBP core complex, HDAC1-associated protein complex, HDAC1-associated core complex cI, BRAF53-BRCA2 complex, ALL-1 supercomplex, BHC110 complex, AOF2-AR complex, ZEB2-KDM1A complex	62|56|59|48	225	56.25	4	35|33|35|22|38|20|35|17|37|29|8|2|1|1|11|7|4|0|5|6|2|4|3|3|6|5|18|10|5|7|19|19|3|1|3|2|8|7|0|0|16|12|7|6	0.92
BRAC	O15178	ENSG00000164458	T-box	P83916	CBX1	Chromobox protein homolog 1 (HP1Hsbeta) (Heterochromatin protein 1 homolog beta) (HP1 beta) (Heterochromatin protein p25) (M31) (Modifier 1 protein) (p25beta)	6		3|3|3|3	12	3	4	0|0|4|4|0|0|0|0|0|0|0|0|0|0|1|0|1|0|0|0|0|0|0|0|0|0|2|1|1|0|0|0|0|0|0|0|0|0|0|0|2|0|0|0	0.79	X				X	X
BRAC	O15178	ENSG00000164458	T-box	Q96G25	MED8	Mediator of RNA polymerase II transcription subunit 8 (Activator-recruited cofactor 32 kDa component) (ARC32) (Mediator complex subunit 8)	5	Mediator complex, ARC complex, TRAP-SMCC mediator complex, Mediator complex	2|2|2|3	9	2.25	4	1|2|0|0|0|0|0|0|0|0|0|1|0|0|0|0|0|0|0|0|0|0|0|0|0|0|0|0|0|0|1|1|0|0|0|0|0|0|0|0|0|0|0|0	0.92
BRAC	O15178	ENSG00000164458	T-box	P54259	ATN1	Atrophin-1 (Dentatorubral-pallidoluysian atrophy protein)	4		8|8|5|5	26	6.5	4	0|0|0|0|0|0|0|0|0|0|0|0|0|0|0|0|0|0|0|0|0|0|0|0|0|0|0|0|1|0|0|0|0|0|0|0|0|0|0|0|0|0|0|0	1
BRAC	O15178	ENSG00000164458	T-box	Q8IX12	CCAR1	Cell division cycle and apoptosis regulator protein 1 (Cell cycle and apoptosis regulatory protein 1) (CARP-1) (Death inducer with SAP domain)	4	TNF-alpha/NF-kappa B signaling complex 10	14|9|12|16	51	12.75	4	9|11|7|4|6|2|8|3|13|4|0|0|1|1|2|5|3|0|1|4|2|3|0|1|0|0|3|4|0|2|4|4|0|0|0|0|1|1|0|0|3|3|1|1	0.79
BRAC	O15178	ENSG00000164458	T-box	Q96T58	MINT	Msx2-interacting protein (SMART/HDAC1-associated repressor protein) (SPEN homolog)	4	Spliceosome, RBP-Jkappa-SHARP complex, SHARP-CtBP complex, SHARP-CtBP1-CtIP complex, SHARP-CtIP-RBP-Jkappa complex, SHARP-CtBP1-CtIP-RBP-Jkappa corepressor complex	18|12|18|19	67	16.75	4	11|17|2|0|7|3|10|1|8|5|1|0|0|0|6|6|13|3|0|0|0|0|0|0|1|2|7|18|3|6|5|11|0|0|0|1|0|1|0|0|0|2|0|0	0.8
BRAC	O15178	ENSG00000164458	T-box	P27708	PYR1	CAD protein [Includes: Glutamine-dependent carbamoyl-phosphate synthase (EC 6.3.5.5); Aspartate carbamoyltransferase (EC 2.1.3.2); Dihydroorotase (EC 3.5.2.3)]	4		100|93|89|91	373	93.25	4	0|0|0|0|0|0|0|0|1|0|0|0|1|1|0|0|1|0|1|1|1|1|0|1|0|0|0|0|0|1|0|0|1|0|1|0|2|1|2|2|1|0|2|1	1
BRAC	O15178	ENSG00000164458	T-box	P63208	SKP1	S-phase kinase-associated protein 1 (Cyclin-A/CDK2-associated protein p19) (p19A) (Organ of Corti protein 2) (OCP-2) (Organ of Corti protein II) (OCP-II) (RNA polymerase II elongation factor-like protein) (SIII) (Transcription elongation factor B polypeptide 1-like) (p19skp1)	4	Ubiquitin E3 ligase (SKP1A, SKP2, CUL1, RBX1), Ubiquitin E3 ligase (SKP1A, FBXW8, CUL7, RBX1), Ubiquitin E3 ligase (SKP1A, SKP2, CUL1), Ubiquitin E3 ligase (SKP1A, BTRC, CUL1), Ubiquitin E3 ligase (SKP1A, FBXW2, CUL1), Ubiquitin E3 ligase (SKP1A, SKP2, CUL1), Ubiquitin E3 ligase (FBXO31, SKP1A, CUL1, RBX1), URI complex (Unconventional prefoldin RPB5 Interactor), Ubiquitin E3 ligase (SKP1A, SKP2, …	9|9|9|11	38	9.5	4	6|8|5|4|5|3|4|4|5|3|2|1|1|0|5|3|5|0|1|2|1|1|0|0|1|2|1|0|2|2|3|5|0|0|0|0|2|2|0|0|0|1|3|1	0.85
BRAC	O15178	ENSG00000164458	T-box	Q8TEK3	DOT1L	Histone-lysine N-methyltransferase, H3 lysine-79 specific (EC 2.1.1.43) (DOT1-like protein) (Histone H3-K79 methyltransferase) (H3-K79-HMTase) (Lysine N-methyltransferase 4)	2		2|2|3|3	10	2.5	4	1|1|0|0|0|0|0|1|0|0|0|0|0|0|0|0|0|0|0|0|0|0|0|0|0|0|1|2|0|0|0|0|0|0|0|0|0|0|0|0|0|0|0|0	0.94
BRAC	O15178	ENSG00000164458	T-box	O15178	BRAC	Brachyury protein (Protein T)	1		63|53|48|51	215	53.75	4	0|0|0|0|0|0|0|0|0|0|0|0|0|0|0|0|0|0|0|0|0|0|0|0|0|0|0|0|0|0|0|0|0|0|0|0|0|0|0|0|0|0|0|0	1
CPEB1	Q9BZB8	ENSG00000214575	Unknown	Q9HCM7	FBSL	Fibrosin-1-like protein (AUTS2-like protein) (HBV X-transactivated gene 9 protein) (HBV XAg-transactivated protein 9)	26		3|3|2|1	9	2.25	4	0|1|0|0|0|0|2|0|0|0|0|0|0|0|0|0|0|0|0|0|0|0|0|0|0|0|0|0|0|0|0|0|0|0|0|0|0|0|0|0|0|0|0|0	0.74
CPEB1	Q9BZB8	ENSG00000214575	Unknown	Q5JSZ5	PRC2B	Protein PRRC2B (HLA-B-associated transcript 2-like 1) (Proline-rich coiled-coil protein 2B)	13		30|22|16|14	82	20.5	4	0|0|0|0|0|0|0|0|0|0|0|0|0|0|0|0|0|0|0|0|1|0|0|0|0|0|2|0|2|0|1|1|0|0|0|0|1|5|0|0|0|0|0|0	1
CPEB1	Q9BZB8	ENSG00000214575	Unknown	O00425	IF2B3	Insulin-like growth factor 2 mRNA-binding protein 3 (IGF2 mRNA-binding protein 3) (IMP-3) (IGF-II mRNA-binding protein 3) (KH domain-containing protein overexpressed in cancer) (hKOC) (VICKZ family member 3)	6	Spliceosome	10|11|6|4	31	7.75	4	1|0|3|2|4|2|2|1|0|0|4|0|0|0|0|0|0|0|0|0|1|0|0|0|0|0|2|0|0|0|2|0|0|0|0|0|0|0|0|0|3|0|0|3	0.91	X				X	X
CPEB1	Q9BZB8	ENSG00000214575	Unknown	Q96I24	FUBP3	Far upstream element-binding protein 3 (FUSE-binding protein 3)	6		43|36|38|32	149	37.25	4	3|4|0|0|0|0|4|0|4|2|0|0|0|1|1|0|0|0|0|0|1|0|0|1|2|2|6|6|3|0|0|2|0|0|0|0|2|5|0|0|0|0|0|0	1
CPEB1	Q9BZB8	ENSG00000214575	Unknown	A5YKK6	CNOT1	CCR4-NOT transcription complex subunit 1 (CCR4-associated factor 1) (Negative regulator of transcription subunit 1 homolog) (NOT1H) (hNOT1)	4	CNOT1-CNOT2-CNOT3 complex, 4E-T-DDX6-CNOT1 complex, CCR4-NOT complex	131|117|60|51	359	89.75	4	0|0|0|0|0|0|0|0|0|0|0|0|0|0|2|0|1|0|0|0|1|0|0|0|0|2|0|0|0|1|0|0|2|4|2|2|2|4|0|1|0|0|4|2	1	X				X
CPEB1	Q9BZB8	ENSG00000214575	Unknown	Q6P2H3	CEP85	Centrosomal protein of 85 kDa (Cep85) (Coiled-coil domain-containing protein 21)	4		43|39|27|17	126	31.5	4	0|0|0|0|0|0|0|0|0|0|0|0|0|0|0|0|0|0|0|0|0|0|0|0|0|0|0|0|1|0|0|0|0|0|0|0|1|0|0|1|0|0|0|0	1
CPEB1	Q9BZB8	ENSG00000214575	Unknown	Q92600	CNOT9	CCR4-NOT transcription complex subunit 9 (Cell differentiation protein RQCD1 homolog) (Rcd-1)	4	CCR4-NOT complex	17|10|11|6	44	11	4	0|0|0|0|0|0|0|0|0|0|0|0|0|0|0|0|1|0|0|0|0|0|0|0|0|0|0|0|0|0|0|0|0|1|0|0|0|1|2|1|0|0|1|1	1
CPEB1	Q9BZB8	ENSG00000214575	Unknown	O75665	OFD1	Oral-facial-digital syndrome 1 protein (Protein 71-7A)	4	KIAA0753-FOR20-OFD1 complex	7|8|5|4	24	6	4	0|0|0|0|0|0|0|0|0|0|1|1|0|0|0|0|0|0|0|0|0|0|0|0|0|0|0|0|0|0|0|0|0|1|1|0|0|0|0|0|0|0|1|0	1
CPEB1	Q9BZB8	ENSG00000214575	Unknown	Q9UPQ9	TNR6B	Trinucleotide repeat-containing gene 6B protein	4		60|52|45|40	197	49.25	4	0|0|0|0|0|0|0|0|0|0|1|3|3|2|3|1|0|0|4|4|3|4|1|0|4|4|0|0|7|6|0|0|7|5|3|2|2|1|2|1|0|0|0|0	1
CPEB1	Q9BZB8	ENSG00000214575	Unknown	Q9BYJ9	YTHD1	YTH domain-containing family protein 1 (Dermatomyositis associated with cancer putative autoantigen 1) (DACA-1)	4		15|16|13|11	55	13.75	4	0|0|0|0|0|0|0|0|0|0|0|0|0|0|1|2|1|0|0|0|0|0|0|0|0|0|0|0|0|0|0|0|0|0|0|0|0|0|0|0|0|0|0|0	1
CPEB1	Q9BZB8	ENSG00000214575	Unknown	Q9Y5A9	YTHD2	YTH domain-containing family protein 2 (CLL-associated antigen KW-14) (High-glucose-regulated protein 8) (Renal carcinoma antigen NY-REN-2)	4		17|15|17|14	63	15.75	4	0|0|0|0|0|0|0|0|0|0|0|0|0|0|1|1|1|0|1|1|0|1|0|0|0|0|0|0|0|0|0|0|0|0|0|0|0|0|0|0|0|0|0|0	1
CPEB1	Q9BZB8	ENSG00000214575	Unknown	Q9NZI8	IF2B1	Insulin-like growth factor 2 mRNA-binding protein 1 (IGF2 mRNA-binding protein 1) (IMP-1) (IMP1) (Coding region determinant-binding protein) (CRD-BP) (IGF-II mRNA-binding protein 1) (VICKZ family member 1) (Zipcode-binding protein 1) (ZBP-1)	3	Nop56p-associated pre-rRNA complex, IGF2BP1 complex	22|20|12|10	64	16	4	3|4|9|6|7|3|3|3|7|2|6|4|5|4|6|3|5|1|5|6|3|4|3|2|0|0|7|4|5|5|3|2|3|2|2|2|5|3|2|0|6|0|5|4	0.82	X				X	X
CPEB1	Q9BZB8	ENSG00000214575	Unknown	Q8NDV7	TNR6A	Trinucleotide repeat-containing gene 6A protein (CAG repeat protein 26) (EMSY interactor protein) (GW182 autoantigen) (Protein GW1) (Glycine-tryptophan protein of 182 kDa)	3		37|32|14|19	102	25.5	4	0|0|0|0|0|0|0|0|0|0|0|1|1|1|1|0|1|0|0|1|0|0|0|0|0|0|0|0|0|0|0|0|0|0|0|0|0|0|0|0|0|0|0|0	1	X				X
CPEB1	Q9BZB8	ENSG00000214575	Unknown	Q04917	1433F	14-3-3 protein eta (Protein AS1)	3	Kinase maturation complex 1	5|5|3|4	17	4.25	4	0|0|0|0|0|0|0|0|0|0|0|0|0|0|0|0|0|0|0|0|0|0|0|0|1|1|0|0|0|0|0|0|0|0|0|0|4|0|0|0|0|0|0|0	0.98
CPEB1	Q9BZB8	ENSG00000214575	Unknown	Q8IWZ3	ANKH1	Ankyrin repeat and KH domain-containing protein 1 (HIV-1 Vpr-binding ankyrin repeat protein) (Multiple ankyrin repeats single KH domain) (hMASK)	3		140|130|81|80	431	107.75	4	0|0|2|1|1|0|0|0|0|0|8|5|7|4|10|0|11|2|5|0|2|0|3|4|9|9|0|0|7|6|1|1|12|12|7|5|10|6|11|8|0|1|5|0	1
CPEB1	Q9BZB8	ENSG00000214575	Unknown	O75175	CNOT3	CCR4-NOT transcription complex subunit 3 (CCR4-associated factor 3) (Leukocyte receptor cluster member 2)	3	CNOT1-CNOT2-CNOT3 complex, CCR4-NOT complex	27|23|18|12	80	20	4	0|0|0|0|0|0|0|0|0|0|0|0|0|0|0|0|0|0|0|0|0|0|0|0|0|0|0|0|1|1|0|0|1|1|1|0|0|1|0|0|0|0|1|1	1
CPEB1	Q9BZB8	ENSG00000214575	Unknown	P34932	HSP74	Heat shock 70 kDa protein 4 (HSP70RY) (Heat shock 70-related protein APG-2)	3	TLE1 corepressor complex (MASH1 promoter-corepressor complex), HCF-1 complex, TLE1 corepressor complex (MASH1 promoter-corepressor complex), Kinase maturation complex 1, MLL1-WDR5 complex, HSP70-BAG5-PARK2 complex	24|27|14|15	80	20	4	8|4|10|8|5|4|10|4|9|5|1|0|5|8|6|5|3|0|2|2|0|1|1|0|3|3|2|0|4|8|8|5|1|0|0|0|5|3|0|0|0|0|0|0	0.93
CPEB1	Q9BZB8	ENSG00000214575	Unknown	Q9NRA8	4ET	Eukaryotic translation initiation factor 4E transporter (4E-T) (eIF4E transporter) (Eukaryotic translation initiation factor 4E nuclear import factor 1)	2	4E-T-DDX6-CNOT1 complex	62|63|30|26	181	45.25	4	0|0|0|0|0|0|0|0|0|0|0|0|1|0|0|0|0|0|0|0|0|1|0|0|0|0|0|0|1|0|0|0|0|1|0|0|0|1|1|1|0|0|0|0	1	X				X	X
CPEB1	Q9BZB8	ENSG00000214575	Unknown	Q01804	OTUD4	OTU domain-containing protein 4 (EC 3.4.19.12) (HIV-1-induced protein HIN-1)	2		6|4|4|4	18	4.5	4	0|0|0|0|0|0|0|0|0|0|0|0|0|0|1|1|1|0|0|0|0|0|0|0|0|0|0|0|0|0|0|0|1|0|1|0|0|0|0|0|0|0|0|0	1	X				X
CPEB1	Q9BZB8	ENSG00000214575	Unknown	Q8ND56	LS14A	Protein LSM14 homolog A (Protein FAM61A) (Protein SCD6 homolog) (Putative alpha-synuclein-binding protein) (AlphaSNBP) (RNA-associated protein 55A) (hRAP55) (hRAP55A)	2		18|15|7|7	47	11.75	4	0|0|4|0|2|1|0|0|0|0|1|1|2|2|0|0|0|0|1|0|1|0|1|2|0|0|1|0|5|3|0|1|1|2|0|0|2|3|2|2|0|0|1|3	0.98	X				X
CPEB1	Q9BZB8	ENSG00000214575	Unknown	Q92900	RENT1	Regulator of nonsense transcripts 1 (EC 3.6.4.-) (ATP-dependent helicase RENT1) (Nonsense mRNA reducing factor 1) (NORF1) (Up-frameshift suppressor 1 homolog) (hUpf1)	2	SMG-1-UPF-ERF1-ERF3 complex (SURF), Upf complex (UPF1, UPF2, UPF3a), Upf complex (UPF1, UPF2, UPF3b), Postsplicing complex, mRNA decay complex (UPF1, UPF2, UPF3B, DCP2, XRN1, XRN2, EXOSC2, EXOSC4, EXOSC10, PARN)	18|16|6|5	45	11.25	4	0|0|0|0|0|0|0|0|0|0|0|0|0|0|0|0|0|0|0|0|0|0|0|0|0|0|0|0|1|0|0|0|0|0|0|0|0|0|0|0|0|0|1|0	1	X				X
CPEB1	Q9BZB8	ENSG00000214575	Unknown	Q9HCE1	MOV10	Putative helicase MOV-10 (EC 3.6.4.13) (Armitage homolog) (Moloney leukemia virus 10 protein)	2	Spliceosome, TRBP containing complex (DICER, TRBP, AGO2, RPL7A, EIF6, MOV10), TRBP containing complex (DICER, RPL7A, EIF6, MOV10 and subunits of the 60S ribosomal particle)	6|5|2|2	15	3.75	4	1|1|0|0|0|0|0|0|0|0|0|0|0|0|0|0|0|0|0|0|0|0|0|0|0|0|0|0|0|0|0|0|0|0|0|0|0|0|0|0|0|0|0|0	0.97	X				X
CPEB1	Q9BZB8	ENSG00000214575	Unknown	O75179	ANR17	Ankyrin repeat domain-containing protein 17 (Gene trap ankyrin repeat protein) (Serologically defined breast cancer antigen NY-BR-16)	2		73|70|34|37	214	53.5	4	0|0|0|1|0|2|0|0|0|0|9|6|7|7|10|9|13|0|5|7|2|4|0|0|10|12|0|0|5|6|0|0|12|8|5|4|14|9|11|10|3|0|5|12	1
CPEB1	Q9BZB8	ENSG00000214575	Unknown	P14866	HNRPL	Heterogeneous nuclear ribonucleoprotein L (hnRNP L)	2	Emerin complex 52	22|19|16|9	66	16.5	4	1|1|11|6|8|6|14|3|7|4|0|0|2|0|4|4|4|0|2|1|1|2|0|0|0|0|2|0|0|0|1|0|0|0|2|2|0|0|0|3|2|5|3|3	0.88
CPEB1	Q9BZB8	ENSG00000214575	Unknown	P17066	HSP76	Heat shock 70 kDa protein 6 (Heat shock 70 kDa protein B')	2		44|57|72|56	229	57.25	4	14|15|19|11|22|13|19|7|16|12|22|21|19|20|21|22|22|10|0|0|20|0|0|33|0|0|0|10|13|11|10|10|8|0|0|0|0|0|0|0|0|0|0|10	0.97
CPEB1	Q9BZB8	ENSG00000214575	Unknown	Q9BY89	K1671	Uncharacterized protein KIAA1671	2		11|6|7|5	29	7.25	4	0|0|0|0|0|0|0|0|0|0|0|1|0|0|2|0|3|1|1|2|1|0|0|0|0|0|0|0|2|2|0|0|2|3|2|2|3|1|2|1|0|0|1|0	0.97
CPEB1	Q9BZB8	ENSG00000214575	Unknown	Q9Y5V3	MAGD1	Melanoma-associated antigen D1 (MAGE tumor antigen CCF) (MAGE-D1 antigen) (Neurotrophin receptor-interacting MAGE homolog)	2		10|8|5|5	28	7	4	0|0|0|0|0|0|0|0|0|0|1|1|1|1|0|0|0|0|1|0|0|0|0|0|0|0|0|0|0|0|0|0|0|0|0|0|0|0|0|0|0|0|0|0	1
CPEB1	Q9BZB8	ENSG00000214575	Unknown	Q92540	SMG7	Protein SMG7 (EST1-like protein C) (SMG-7 homolog) (hSMG-7)	2		30|28|16|12	86	21.5	4	0|0|0|0|0|0|0|0|0|0|0|0|0|0|0|0|0|0|0|0|0|0|0|0|1|1|0|0|3|2|0|0|3|2|1|1|2|0|0|0|0|0|1|0	1
CPEB1	Q9BZB8	ENSG00000214575	Unknown	Q9HCJ0	TNR6C	Trinucleotide repeat-containing gene 6C protein	2		17|21|11|8	57	14.25	4	0|0|0|0|0|0|0|0|0|0|0|0|0|0|0|1|0|0|0|1|0|0|0|0|1|1|0|0|3|1|0|0|1|2|0|0|0|0|0|0|0|0|1|0	1
CPEB1	Q9BZB8	ENSG00000214575	Unknown	Q14157	UBP2L	Ubiquitin-associated protein 2-like (Protein NICE-4)	1	CPSF6-ITCH-NUDT21-POLR2A-UBAP2L complex, CPSF6-EWSR1-ITCH-NUDT21-POLR2A-UBAP2L complex, ATAC complex, YEATS2-linked	58|61|50|43	212	53	4	6|5|5|2|6|3|5|3|5|3|17|11|16|12|20|21|17|8|11|13|13|15|3|11|13|13|9|4|18|20|9|9|25|22|19|10|26|25|13|9|7|3|11|13	0.98	X				X	X
CPEB1	Q9BZB8	ENSG00000214575	Unknown	Q14671	PUM1	Pumilio homolog 1 (HsPUM) (Pumilio-1)	1		20|25|8|7	60	15	4	0|0|0|0|0|0|0|0|0|0|0|0|0|0|0|0|0|0|0|0|0|0|0|0|0|0|0|0|0|0|0|0|0|0|0|0|0|0|0|0|0|0|0|0	1	X				X	X
CPEB1	Q9BZB8	ENSG00000214575	Unknown	Q15717	ELAV1	ELAV-like protein 1 (Hu-antigen R) (HuR)	1	IGF2BP1 complex	3|2|2|2	9	2.25	4	0|0|0|0|0|0|0|0|0|0|0|0|0|0|0|0|0|0|0|0|0|0|0|0|0|0|0|0|0|0|0|0|0|0|0|0|0|0|0|0|0|0|0|1	0.95	X				X	X
CPEB1	Q9BZB8	ENSG00000214575	Unknown	Q5T6F2	UBAP2	Ubiquitin-associated protein 2 (UBAP-2)	1		32|35|23|19	109	27.25	4	0|0|0|0|0|0|1|0|1|1|8|3|3|2|3|4|4|0|4|6|6|7|6|5|4|4|3|1|7|7|5|2|8|6|7|5|11|10|4|4|1|0|4|2	0.99	X				X	X
CPEB1	Q9BZB8	ENSG00000214575	Unknown	Q8TB72	PUM2	Pumilio homolog 2 (Pumilio-2)	1		4|6|2|2	14	3.5	4	0|0|0|0|0|0|0|0|0|0|0|0|0|0|0|0|0|0|0|0|0|0|0|0|0|0|0|0|0|0|0|0|0|0|0|0|0|0|0|0|0|0|0|0	0.97	X				X	X
CPEB1	Q9BZB8	ENSG00000214575	Unknown	P29558	RBMS1	RNA-binding motif, single-stranded-interacting protein 1 (Single-stranded DNA-binding protein MSSP-1) (Suppressor of CDC2 with RNA-binding motif 2)	1		2|2|2|2	8	2	4	0|0|0|0|0|0|0|0|0|0|0|0|0|0|0|0|0|0|0|0|0|0|0|0|0|0|0|0|0|0|0|0|0|0|0|0|0|0|0|0|0|0|0|0	0.94	X				X
CPEB1	Q9BZB8	ENSG00000214575	Unknown	P63244	RACK1	Receptor of activated protein C kinase 1 (Cell proliferation-inducing gene 21 protein) (Guanine nucleotide-binding protein subunit beta-2-like 1) (Guanine nucleotide-binding protein subunit beta-like protein 12.3) (Human lung cancer oncogene 7 protein) (HLC-7) (Receptor for activated C kinase) (Small ribosomal subunit protein RACK1) [Cleaved into: Receptor of activated protein C kinase 1, N-termi…	1	G protein complex (GNG2, GNB2L1, RAF1)	10|8|6|6	30	7.5	4	0|1|0|0|0|0|2|1|2|1|1|0|0|0|0|1|0|0|0|1|0|0|0|0|2|3|0|0|1|1|1|0|6|3|1|0|3|4|3|2|0|0|0|1	0.92	X				X
CPEB1	Q9BZB8	ENSG00000214575	Unknown	Q6P2E9	EDC4	Enhancer of mRNA-decapping protein 4 (Autoantigen Ge-1) (Autoantigen RCD-8) (Human enhancer of decapping large subunit) (Hedls)	1	Decapping complex	26|22|8|6	62	15.5	4	0|0|0|0|0|0|0|0|0|0|2|2|0|0|3|3|5|0|0|0|0|0|0|0|2|0|0|0|3|2|0|0|2|2|2|2|5|3|2|2|1|1|2|3	0.94	X				X
CPEB1	Q9BZB8	ENSG00000214575	Unknown	Q6Y7W6	GGYF2	GRB10-interacting GYF protein 2 (PERQ amino acid-rich with GYF domain-containing protein 2) (Trinucleotide repeat-containing gene 15 protein)	1		40|43|20|25	128	32	4	3|4|0|0|0|0|3|1|1|1|14|9|14|6|13|12|15|4|6|4|5|5|0|1|3|5|3|3|7|9|5|1|14|9|3|2|14|15|4|4|0|1|0|3	0.93	X				X
CPEB1	Q9BZB8	ENSG00000214575	Unknown	Q71RC2	LARP4	La-related protein 4 (La ribonucleoprotein domain family member 4)	1		4|3|5|2	14	3.5	4	0|0|0|0|0|0|0|0|0|0|1|2|0|0|0|0|0|0|1|1|1|1|0|0|0|0|0|0|0|0|0|0|0|0|0|0|0|0|0|0|0|0|0|0	0.97	X				X
CPEB1	Q9BZB8	ENSG00000214575	Unknown	Q86TB9	PATL1	Protein PAT1 homolog 1 (PAT1-like protein 1) (Protein PAT1 homolog b) (Pat1b) (hPat1b)	1		17|14|10|9	50	12.5	4	0|0|0|0|0|0|0|0|0|0|0|0|0|0|0|0|0|0|0|0|0|0|0|0|0|0|0|0|0|1|0|0|1|1|1|0|1|1|0|0|0|0|0|0	1	X				X
CPEB1	Q9BZB8	ENSG00000214575	Unknown	Q8IZD4	DCP1B	mRNA-decapping enzyme 1B (EC 3.-.-.-)	1		30|28|20|18	96	24	4	1|0|0|0|0|0|0|0|0|0|2|0|2|1|2|0|2|1|1|0|0|1|0|0|1|2|0|0|4|3|0|0|4|2|1|0|3|1|1|1|0|0|0|2	1	X				X
CPEB1	Q9BZB8	ENSG00000214575	Unknown	Q8IZH2	XRN1	5'-3' exoribonuclease 1 (EC 3.1.13.-) (Strand-exchange protein 1 homolog)	1	mRNA decay complex (UPF1, UPF2, UPF3B, DCP2, XRN1, XRN2, EXOSC2, EXOSC4, EXOSC10, PARN)	53|61|34|26	174	43.5	4	0|1|0|1|1|0|0|0|0|0|10|4|6|4|7|12|8|1|3|1|1|1|1|0|4|5|1|1|9|8|0|0|8|10|8|4|14|12|9|10|0|0|10|11	0.99	X				X
CPEB1	Q9BZB8	ENSG00000214575	Unknown	Q96F86	EDC3	Enhancer of mRNA-decapping protein 3 (LSM16 homolog) (YjeF N-terminal domain-containing protein 2) (YjeF_N2) (hYjeF_N2) (YjeF domain-containing protein 1)	1	Decapping complex	33|29|16|7	85	21.25	4	0|0|1|1|1|0|0|2|2|1|1|2|2|1|2|1|2|0|1|2|1|1|0|0|0|0|0|0|1|0|0|0|2|0|1|1|1|2|0|0|0|0|0|1	1	X				X
CPEB1	Q9BZB8	ENSG00000214575	Unknown	Q99700	ATX2	Ataxin-2 (Spinocerebellar ataxia type 2 protein) (Trinucleotide repeat-containing gene 13 protein)	1		37|38|18|23	116	29	4	0|0|0|0|0|0|1|0|2|0|1|3|2|2|0|1|2|0|0|0|0|0|0|0|2|5|2|1|9|8|2|3|8|9|1|1|3|3|3|1|0|0|2|0	1	X				X
CPEB1	Q9BZB8	ENSG00000214575	Unknown	Q9BX40	LS14B	Protein LSM14 homolog B (Protein FAM61B) (RNA-associated protein 55B) (hRAP55B)	1		5|9|2|3	19	4.75	4	0|0|0|0|0|0|0|0|0|0|0|0|0|0|0|0|0|0|0|0|0|0|0|0|0|0|0|0|0|0|0|0|0|0|0|0|0|0|0|0|0|0|0|0	0.98	X				X
CPEB1	Q9BZB8	ENSG00000214575	Unknown	Q9NPI6	DCP1A	mRNA-decapping enzyme 1A (EC 3.-.-.-) (Smad4-interacting transcriptional co-activator) (Transcription factor SMIF)	1	Decapping complex, DCP1A-DCP2 Decapping complex	25|22|7|4	58	14.5	4	0|0|0|0|1|0|0|0|0|0|2|0|0|0|2|1|2|0|1|1|1|1|0|0|0|0|0|0|1|2|0|0|3|3|2|1|1|2|0|0|0|0|0|3	0.95	X				X
CPEB1	Q9BZB8	ENSG00000214575	Unknown	Q9UFF9	CNOT8	CCR4-NOT transcription complex subunit 8 (EC 3.1.13.4) (CAF1-like protein) (CALIFp) (CAF2) (CCR4-associated factor 8) (Caf1b)	1		4|4|2|2	12	3	4	0|0|0|0|0|0|0|0|0|0|0|0|0|0|0|0|0|0|0|0|0|0|0|0|0|0|0|0|0|0|0|0|0|0|0|0|0|0|0|0|0|0|0|0	0.97	X				X
CPEB1	Q9BZB8	ENSG00000214575	Unknown	Q9UIV1	CNOT7	CCR4-NOT transcription complex subunit 7 (EC 3.1.13.4) (BTG1-binding factor 1) (CCR4-associated factor 1) (CAF-1) (Caf1a)	1	CCR4-NOT complex	8|5|4|3	20	5	4	0|0|0|0|0|0|0|0|0|0|0|0|0|0|0|1|0|0|0|0|0|0|0|0|0|0|0|0|0|0|0|0|0|0|0|0|0|0|0|0|0|0|1|0	1	X				X
CPEB1	Q9BZB8	ENSG00000214575	Unknown	Q9UKV8	AGO2	Protein argonaute-2 (Argonaute2) (hAgo2) (EC 3.1.26.n2) (Argonaute RISC catalytic component 2) (Eukaryotic translation initiation factor 2C 2) (eIF-2C 2) (eIF2C 2) (PAZ Piwi domain protein) (PPD) (Protein slicer)	1	DICER1-NCOA6-AGO2 complex, TTP-AGO2 complex, RNA-induced silencing complex, RISC, AGO2-FXR1-TNF(alpha)ARE-RNP complex, RNA-induced silencing complex, RISC, TRBP containing complex (DICER, TRBP, AGO2, RPL7A, EIF6, MOV10), RNA-induced silencing complex, RISC	27|29|10|5	71	17.75	4	0|0|0|0|0|0|0|0|0|0|0|0|0|0|0|0|0|0|0|0|0|0|0|0|0|0|0|0|0|0|0|0|0|0|0|0|0|0|0|0|0|0|0|0	1	X				X
CPEB1	Q9BZB8	ENSG00000214575	Unknown	Q9UL18	AGO1	Protein argonaute-1 (Argonaute1) (hAgo1) (Argonaute RISC catalytic component 1) (Eukaryotic translation initiation factor 2C 1) (eIF-2C 1) (eIF2C 1) (Putative RNA-binding protein Q99)	1		12|13|5|5	35	8.75	4	0|0|0|0|0|0|0|0|0|0|0|0|0|0|0|0|0|0|0|0|0|0|0|0|0|0|0|0|0|0|0|0|0|0|0|0|0|0|0|0|0|0|0|0	1	X				X
CPEB1	Q9BZB8	ENSG00000214575	Unknown	Q9UPR3	SMG5	Protein SMG5 (EST1-like protein B) (LPTS-RP1) (LPTS-interacting protein) (SMG-5 homolog) (hSMG-5)	1		15|16|4|5	40	10	4	0|0|0|0|0|0|0|0|0|0|0|0|0|0|1|1|0|0|0|0|0|0|0|0|0|0|0|0|0|0|0|0|0|0|0|0|0|0|0|0|0|0|0|0	1	X				X
CPEB1	Q9BZB8	ENSG00000214575	Unknown	Q9BZB8	CPEB1	Cytoplasmic polyadenylation element-binding protein 1 (CPE-BP1) (CPE-binding protein 1) (h-CPEB) (hCPEB-1)	1		295|302|159|152	908	227	4	0|0|0|0|0|0|0|0|0|0|0|0|0|0|0|0|0|0|0|0|0|0|0|0|0|0|0|0|0|0|0|0|0|0|0|0|0|0|0|0|0|0|0|0	1	X	X	X
CPEB1	Q9BZB8	ENSG00000214575	Unknown	Q9H9G7	AGO3	Protein argonaute-3 (Argonaute3) (hAgo3) (Argonaute RISC catalytic component 3) (Eukaryotic translation initiation factor 2C 3) (eIF-2C 3) (eIF2C 3)	1		5|9|4|3	21	5.25	4	0|0|0|0|0|0|0|0|0|0|0|0|0|0|0|0|0|0|0|0|0|0|0|0|0|0|0|0|0|0|0|0|0|0|0|0|0|0|0|0|0|0|0|0	1
CPEB1	Q9BZB8	ENSG00000214575	Unknown	Q96KQ4	ASPP1	Apoptosis-stimulating of p53 protein 1 (Protein phosphatase 1 regulatory subunit 13B)	1	ASPP1-SAM68 complex	4|7|2|4	17	4.25	4	0|0|0|0|0|0|0|0|0|0|0|0|0|0|0|0|0|0|0|0|0|0|0|0|0|0|0|0|0|0|0|0|0|0|0|0|2|2|0|0|0|0|0|0	0.98
CPEB1	Q9BZB8	ENSG00000214575	Unknown	Q6P1N0	C2D1A	Coiled-coil and C2 domain-containing protein 1A (Akt kinase-interacting protein 1) (Five prime repressor element under dual repression-binding protein 1) (FRE under dual repression-binding protein 1) (Freud-1) (Putative NF-kappa-B-activating protein 023N)	1		5|6|3|2	16	4	4	0|0|0|0|0|0|0|0|0|0|0|0|0|0|0|0|0|0|0|0|0|0|0|0|0|0|0|0|0|0|0|0|0|0|0|0|0|0|0|0|0|0|0|0	0.98
CPEB1	Q9BZB8	ENSG00000214575	Unknown	A6NKD9	CC85C	Coiled-coil domain-containing protein 85C	1		7|6|5|4	22	5.5	4	0|1|0|0|0|0|0|0|0|0|0|0|0|0|1|1|1|0|0|0|0|0|0|0|4|3|0|0|3|3|1|0|3|0|1|1|8|4|1|1|0|0|1|0	0.78
CPEB1	Q9BZB8	ENSG00000214575	Unknown	Q9H9A5	CNO10	CCR4-NOT transcription complex subunit 10	1	CCR4-NOT complex	23|25|14|12	74	18.5	4	0|0|0|0|0|0|0|0|0|0|0|0|0|0|1|1|1|0|0|0|0|0|1|1|0|0|0|0|2|1|0|0|0|0|0|0|1|0|0|0|0|0|0|1	1
CPEB1	Q9BZB8	ENSG00000214575	Unknown	Q9UKZ1	CNO11	CCR4-NOT transcription complex subunit 11	1	CCR4-NOT complex	15|13|6|4	38	9.5	4	0|0|0|0|0|0|0|0|0|0|0|0|0|0|0|0|0|0|0|1|0|0|0|0|0|0|0|0|0|0|0|0|1|0|0|0|0|0|0|0|0|0|0|0	1
CPEB1	Q9BZB8	ENSG00000214575	Unknown	Q9NZN8	CNOT2	CCR4-NOT transcription complex subunit 2 (CCR4-associated factor 2)	1	CNOT1-CNOT2-CNOT3 complex, CCR4-NOT complex	23|21|13|11	68	17	4	0|0|0|0|0|0|0|0|0|0|1|0|0|0|1|1|1|0|0|1|0|1|0|0|0|0|0|0|0|1|0|0|0|1|1|1|0|1|0|1|0|0|0|0	1
CPEB1	Q9BZB8	ENSG00000214575	Unknown	O75420	GGYF1	GRB10-interacting GYF protein 1 (PERQ amino acid-rich with GYF domain-containing protein 1)	1		23|23|4|3	53	13.25	4	0|0|0|0|0|0|0|0|0|0|0|0|0|0|0|0|0|0|0|0|0|0|0|0|0|0|0|0|0|0|0|0|0|0|0|0|0|0|0|0|0|0|0|0	1
CPEB1	Q9BZB8	ENSG00000214575	Unknown	O00178	GTPB1	GTP-binding protein 1 (G-protein 1) (GP-1) (GP1)	1		3|2|2|3	10	2.5	4	0|0|0|0|0|0|0|0|0|0|0|0|0|0|0|0|0|0|0|0|0|0|0|0|1|0|0|0|0|0|0|0|0|0|0|0|0|0|0|0|0|0|1|0	0.97
CPEB1	Q9BZB8	ENSG00000214575	Unknown	P42694	HELZ	Probable helicase with zinc finger domain (EC 3.6.4.-) (Down-regulated in human cancers protein)	1		8|11|4|3	26	6.5	4	0|0|0|0|0|0|0|0|0|0|0|0|0|0|0|0|0|0|0|0|0|0|0|0|0|0|0|0|0|0|0|0|0|0|0|0|0|1|0|0|0|0|0|0	1
CPEB1	Q9BZB8	ENSG00000214575	Unknown	Q9Y6M1	IF2B2	Insulin-like growth factor 2 mRNA-binding protein 2 (IGF2 mRNA-binding protein 2) (IMP-2) (Hepatocellular carcinoma autoantigen p62) (IGF-II mRNA-binding protein 2) (VICKZ family member 2)	1		8|9|9|4	30	7.5	4	0|0|0|0|0|0|0|0|0|0|0|0|0|0|0|0|0|0|0|0|0|0|0|0|0|0|0|0|0|0|0|0|0|0|0|0|0|0|0|0|0|1|0|0	1
CPEB1	Q9BZB8	ENSG00000214575	Unknown	P51617	IRAK1	Interleukin-1 receptor-associated kinase 1 (IRAK-1) (EC 2.7.11.1)	1	IRAK1-IRAK2 complex, IRAK1-IRAK3 complex	10|10|2|5	27	6.75	4	0|0|0|0|0|0|0|0|0|0|1|1|0|1|0|0|0|0|0|0|3|0|0|0|0|0|0|0|0|0|0|0|0|0|0|0|0|0|1|0|0|0|0|0	0.96
CPEB1	Q9BZB8	ENSG00000214575	Unknown	O15063	K0355	Uncharacterized protein KIAA0355	1		19|19|3|7	48	12	4	0|0|0|0|0|0|0|0|0|0|0|0|0|0|0|0|0|0|0|0|0|0|0|0|0|0|0|0|0|0|0|0|0|0|0|0|0|0|0|0|0|0|0|0	1
CPEB1	Q9BZB8	ENSG00000214575	Unknown	Q92615	LAR4B	La-related protein 4B (La ribonucleoprotein domain family member 4B) (La ribonucleoprotein domain family member 5) (La-related protein 5)	1		9|6|3|3	21	5.25	4	0|0|0|0|0|0|0|0|0|0|0|0|0|0|0|0|0|0|0|0|0|0|0|0|0|0|0|0|1|0|0|0|0|0|0|0|0|0|0|0|0|0|0|0	1
CPEB1	Q9BZB8	ENSG00000214575	Unknown	Q9Y4F3	MARF1	Meiosis regulator and mRNA stability factor 1 (Limkain-b1) (Meiosis arrest female protein 1)	1		6|9|2|2	19	4.75	4	0|0|0|0|0|0|0|0|0|0|0|0|0|0|1|0|1|0|0|0|0|0|1|0|0|0|0|0|0|0|0|0|0|0|0|0|0|0|0|0|0|0|0|0	0.97
CPEB1	Q9BZB8	ENSG00000214575	Unknown	Q9BUT9	MCRI2	MAPK regulated corepressor interacting protein 2 (Protein FAM195A)	1		10|14|8|9	41	10.25	4	0|0|0|0|0|0|0|0|0|0|0|0|0|0|1|0|0|0|0|0|0|0|0|0|0|0|0|0|1|0|0|0|0|1|0|0|0|0|1|0|0|0|0|0	1
CPEB1	Q9BZB8	ENSG00000214575	Unknown	Q99417	MYCBP	c-Myc-binding protein (Associate of Myc 1) (AMY-1)	1	AMY-1-S-AKAP84-RII-beta complex	9|8|3|5	25	6.25	4	1|0|0|0|0|0|0|0|0|0|0|0|0|0|1|0|0|0|0|0|0|0|0|0|0|0|0|0|0|0|0|0|0|0|0|0|0|0|0|0|0|0|0|0	1
CPEB1	Q9BZB8	ENSG00000214575	Unknown	Q58A45	PAN3	PAN2-PAN3 deadenylation complex subunit PAN3 (PAB1P-dependent poly(A)-specific ribonuclease) (Poly(A)-nuclease deadenylation complex subunit 3) (PAN deadenylation complex subunit 3)	1		5|6|3|2	16	4	4	0|0|0|0|1|0|0|0|1|0|0|0|0|0|0|0|0|0|0|0|0|0|0|0|0|0|0|0|0|0|0|0|0|0|0|0|1|0|0|0|0|0|0|0	0.98
CPEB1	Q9BZB8	ENSG00000214575	Unknown	O60925	PFD1	Prefoldin subunit 1	1	Prefoldin complex, Prefoldin complex, CCT:PFD complex, CCT:PFD complex, testis specific	3|4|2|3	12	3	4	1|1|2|0|0|0|1|0|0|0|0|0|1|1|0|1|0|0|0|0|0|0|0|0|1|0|1|0|1|2|1|0|0|1|0|0|1|1|0|0|0|0|1|1	0.75
CPEB1	Q9BZB8	ENSG00000214575	Unknown	P48634	PRC2A	Protein PRRC2A (HLA-B-associated transcript 2) (Large proline-rich protein BAT2) (Proline-rich and coiled-coil-containing protein 2A) (Protein G2)	1		129|119|103|84	435	108.75	4	10|11|5|1|5|2|7|1|6|3|11|10|9|4|12|10|9|2|2|2|3|6|5|8|3|1|13|6|19|15|13|9|16|22|10|12|22|16|1|0|3|1|8|7	1
CPEB1	Q9BZB8	ENSG00000214575	Unknown	Q9Y520	PRC2C	Protein PRRC2C (BAT2 domain-containing protein 1) (HBV X-transactivated gene 2 protein) (HBV XAg-transactivated protein 2) (HLA-B-associated transcript 2-like 2) (Proline-rich and coiled-coil-containing protein 2C)	1		98|101|94|74	367	91.75	4	10|10|3|0|5|0|7|0|6|0|13|15|17|17|26|24|21|3|13|8|9|15|9|8|9|10|3|4|28|32|5|8|36|28|21|14|27|29|12|13|3|2|15|15	1
CPEB1	Q9BZB8	ENSG00000214575	Unknown	Q15032	R3HD1	R3H domain-containing protein 1	1		10|8|5|6	29	7.25	4	0|0|0|0|0|0|0|0|0|0|0|0|0|0|0|0|0|0|0|0|0|0|0|0|0|0|0|0|0|0|0|0|0|0|0|0|0|0|0|0|0|0|0|0	1
CPEB1	Q9BZB8	ENSG00000214575	Unknown	Q9Y2K5	R3HD2	R3H domain-containing protein 2	1		7|7|2|1	17	4.25	4	0|0|0|0|0|0|0|0|0|0|0|0|0|0|0|0|0|0|0|0|0|0|0|0|0|0|0|0|0|0|0|0|0|0|0|0|0|0|0|0|0|0|0|0	0.74
CPEB1	Q9BZB8	ENSG00000214575	Unknown	Q5TC82	RC3H1	Roquin-1 (Roquin) (RING finger and C3H zinc finger protein 1) (RING finger and CCCH-type zinc finger domain-containing protein 1) (RING finger protein 198)	1		19|17|7|8	51	12.75	4	0|0|0|0|0|0|0|0|0|0|0|0|0|0|0|0|0|0|0|0|0|0|0|0|0|1|0|0|0|0|0|0|0|0|0|0|0|0|0|0|0|0|0|0	1
CPEB1	Q9BZB8	ENSG00000214575	Unknown	Q8ND24	RN214	RING finger protein 214	1		8|9|4|5	26	6.5	4	0|0|0|0|0|0|0|0|0|0|0|0|0|0|0|0|0|0|1|1|0|0|0|0|0|0|0|0|1|1|0|0|1|1|0|0|0|0|0|0|0|0|0|0	1
CPEB1	Q9BZB8	ENSG00000214575	Unknown	Q8WU79	SMAP2	Stromal membrane-associated protein 2 (Stromal membrane-associated protein 1-like)	1		12|9|8|5	34	8.5	4	0|0|0|0|0|0|0|0|0|0|0|0|0|0|0|0|0|0|1|1|1|1|0|0|0|0|0|0|0|0|0|0|0|0|0|0|1|2|0|0|0|0|0|0	1
CPEB1	Q9BZB8	ENSG00000214575	Unknown	Q49AM3	TTC31	Tetratricopeptide repeat protein 31 (TPR repeat protein 31)	1		7|6|5|2	20	5	4	0|0|0|0|0|0|0|0|0|0|0|0|0|0|0|0|0|0|0|0|0|0|0|0|0|0|0|0|0|0|0|0|0|0|0|0|0|0|0|0|0|0|0|0	0.98
CPEB1	Q9BZB8	ENSG00000214575	Unknown	Q70EL1	UBP54	Inactive ubiquitin carboxyl-terminal hydrolase 54 (Inactive ubiquitin-specific peptidase 54)	1		2|3|2|3	10	2.5	4	0|0|0|0|0|0|0|0|0|0|0|0|0|0|0|0|0|0|0|0|0|0|0|0|0|0|0|0|0|0|0|0|0|0|0|0|0|0|0|0|0|0|0|0	0.97
CPEB1	Q9BZB8	ENSG00000214575	Unknown	Q9C0B0	UNK	RING finger protein unkempt homolog (Zinc finger CCCH domain-containing protein 5)	1		18|15|10|9	52	13	4	0|0|0|0|0|0|0|0|0|0|1|0|0|0|0|0|0|0|0|0|0|0|0|0|0|0|0|0|0|0|0|0|0|0|0|0|0|0|0|0|0|0|0|0	1
CPEB1	Q9BZB8	ENSG00000214575	Unknown	Q7Z739	YTHD3	YTH domain-containing family protein 3	1		12|11|11|9	43	10.75	4	0|0|2|1|1|2|1|0|0|0|0|0|0|0|0|0|0|0|0|0|0|0|0|0|0|0|0|0|0|0|0|0|0|0|0|0|0|0|0|0|0|0|0|0	1
CPEB1	Q9BZB8	ENSG00000214575	Unknown	Q7Z2W4	ZCCHV	Zinc finger CCCH-type antiviral protein 1 (ADP-ribosyltransferase diphtheria toxin-like 13) (ARTD13) (Zinc finger CCCH domain-containing protein 2) (Zinc finger antiviral protein) (ZAP)	1		19|25|6|9	59	14.75	4	0|0|2|0|0|0|0|0|0|0|2|1|0|2|2|2|1|0|1|1|1|1|0|0|0|1|1|0|4|1|0|0|4|1|0|1|10|9|1|0|1|0|2|2	0.9
CREB1	P16220	ENSG00000118260	bZIP	P34931	HS71L	Heat shock 70 kDa protein 1-like (Heat shock 70 kDa protein 1L) (Heat shock 70 kDa protein 1-Hom) (HSP70-Hom)	4		88|68|81|52	289	72.25	4	0|0|0|0|0|0|0|0|54|0|53|46|52|0|36|33|36|19|0|0|0|0|0|0|0|0|0|0|0|0|0|20|0|0|0|0|0|0|37|37|0|36|0|0	0.95	X				X	X
CREB1	P16220	ENSG00000118260	bZIP	P34932	HSP74	Heat shock 70 kDa protein 4 (HSP70RY) (Heat shock 70-related protein APG-2)	3	TLE1 corepressor complex (MASH1 promoter-corepressor complex), HCF-1 complex, TLE1 corepressor complex (MASH1 promoter-corepressor complex), Kinase maturation complex 1, MLL1-WDR5 complex, HSP70-BAG5-PARK2 complex	26|15|30|13	84	21	4	8|4|10|8|5|4|10|4|9|5|1|0|5|8|6|5|3|0|2|2|0|1|1|0|3|3|2|0|4|8|8|5|1|0|0|0|5|3|0|0|0|0|0|0	0.92	X				X	X
CREB1	P16220	ENSG00000118260	bZIP	P16220	CREB1	Cyclic AMP-responsive element-binding protein 1 (CREB-1) (cAMP-responsive element-binding protein 1)	2	LMO4-CREB complex, FHL2-CREB complex, FHL3-CREB complex, ACT-CREB complex, ATF4-CREB1 complex	43|38|52|40	173	43.25	4	0|0|0|0|0|0|0|0|0|0|0|0|0|0|0|0|0|0|0|0|0|0|0|0|0|0|0|0|0|0|0|0|0|0|0|0|0|0|0|0|0|0|0|0	1	X	X	X				X
E2F1	Q01094	ENSG00000101412	E2F	O00763	ACACB	Acetyl-CoA carboxylase 2 (EC 6.4.1.2) (ACC-beta) [Includes: Biotin carboxylase (EC 6.3.4.14)]	22		48|44|62|51	205	51.25	4	0|0|23|23|22|19|0|0|0|0|19|0|0|0|0|22|0|0|16|0|21|0|0|0|0|0|0|0|0|0|0|0|0|0|13|5|0|0|40|32|32|21|21|18	0.94	X				X	X
E2F1	Q01094	ENSG00000101412	E2F	Q92560	BAP1	Ubiquitin carboxyl-terminal hydrolase BAP1 (EC 3.4.19.12) (BRCA1-associated protein 1) (Cerebral protein 6)	22		3|3|5|5	16	4	4	1|1|1|2|0|0|1|0|1|0|0|0|0|0|0|1|0|0|0|0|0|0|0|0|0|0|2|3|0|0|0|0|0|0|0|0|0|0|0|0|1|1|0|0	0.92
E2F1	Q01094	ENSG00000101412	E2F	Q96QT6	PHF12	PHD finger protein 12 (PHD factor 1) (Pf1)	22		4|5|8|4	21	5.25	4	1|0|2|0|3|1|2|0|1|0|1|3|2|0|3|1|1|0|1|1|1|1|0|0|0|0|0|5|0|0|0|3|0|0|0|0|0|0|0|0|2|3|0|0	0.77
E2F1	Q01094	ENSG00000101412	E2F	Q7Z589	EMSY	BRCA2-interacting transcriptional repressor EMSY	21	NIF-1-DBC1-EMSY complex	11|12|12|12	47	11.75	4	3|3|6|2|4|3|4|2|3|3|0|0|0|0|4|0|3|0|2|1|2|1|1|1|0|0|10|14|0|1|2|6|1|0|1|1|0|1|0|0|6|5|2|1	0.85
E2F1	Q01094	ENSG00000101412	E2F	Q8WUU5	GATD1	GATA zinc finger domain-containing protein 1 (Ocular development-associated gene protein)	21		3|5|2|4	14	3.5	4	1|3|1|2|0|1|1|1|1|1|0|0|0|0|0|0|0|0|0|0|0|0|0|0|0|0|0|0|0|0|0|2|0|0|0|1|0|0|0|0|1|2|0|1	0.8
E2F1	Q01094	ENSG00000101412	E2F	Q9H2F5	EPC1	Enhancer of polycomb homolog 1	15	NuA4/Tip60 HAT complex, NuA4/Tip60 HAT complex, NuA4/Tip60-HAT complex B, NuA4/Tip60-HAT complex A, DMAP1-associated complex, NuA4/Tip60 HAT complex, NuA4/Tip60 HAT complex	3|3|4|3	13	3.25	4	0|0|1|0|1|0|0|0|0|0|0|0|0|0|0|0|0|0|1|1|0|0|0|1|0|0|0|0|0|0|0|0|0|0|0|0|0|0|0|0|1|4|0|0	0.9	X				X	X
E2F1	Q01094	ENSG00000101412	E2F	Q9Y3C1	NOP16	Nucleolar protein 16 (HBV pre-S2 trans-regulated protein 3)	15		2|4|2|2	10	2.5	4	0|0|0|0|1|0|0|0|0|0|0|0|0|0|0|1|1|0|0|0|1|1|0|0|0|0|0|0|0|0|0|1|0|0|0|0|0|0|0|0|1|2|0|1	0.8
E2F1	Q01094	ENSG00000101412	E2F	Q92830	KAT2A	Histone acetyltransferase KAT2A (EC 2.3.1.48) (General control of amino acid synthesis protein 5-like 2) (Histone acetyltransferase GCN5) (hGCN5) (Histone succinyltransferase KAT2A) (EC 2.3.1.-) (Lysine acetyltransferase 2A) (STAF97)	14	GCN5-TRRAP histone acetyltransferase complex, TFTC-type histone acetyl transferase complex, TFTC complex (TATA-binding protein-free TAF-II-containing complex), TFTC complex (TATA-binding protein-free TAF-II-containing complex), TFTC complex (TATA-binding protein-free TAF-II-containing complex), TFTC complex (TATA-binding protein-free TAF-II-containing complex), TFTC complex (TATA-binding protein-…	9|3|10|7	29	7.25	4	2|2|1|3|6|5|1|0|4|1|0|0|0|0|0|0|1|0|0|0|0|0|0|0|0|0|0|0|0|0|1|1|0|0|0|1|0|0|0|0|1|0|1|1	0.86	X	X	X	X	X	X
E2F1	Q01094	ENSG00000101412	E2F	Q92831	KAT2B	Histone acetyltransferase KAT2B (EC 2.3.1.48) (Histone acetyltransferase PCAF) (Histone acetylase PCAF) (Lysine acetyltransferase 2B) (P300/CBP-associated factor) (P/CAF)	13	Multisubunit ACTR coactivator complex, PCAF complex, PCAF complex, FOXO3-PCAF complex, oxidative stress stimulated, CREBBP-KAT2B-MYOD1 complex, Smad1-Notch1-p300-Pcaf complex, RNA polymerase II complex (CBP, PCAF, RPB1, BAF47, CYCC, CDK8), chromatin structure modifying, RNA polymerase II complex, incomplete (CBP, RPBI, PCAF, BAF47), chromatin structure modifying, RNA polymerase II complex, chroma…	3|5|4|4	16	4	4	0|0|0|0|0|0|0|0|0|0|0|0|0|0|0|0|0|0|0|0|0|0|0|0|0|0|0|3|0|0|0|0|0|0|0|0|0|0|0|0|0|0|0|0	0.99	X	X	X	X	X	X
E2F1	Q01094	ENSG00000101412	E2F	Q9NS73	MBIP1	MAP3K12-binding inhibitory protein 1 (MAPK upstream kinase-binding inhibitory protein) (MUK-binding inhibitory protein)	12	ATAC complex, GCN5-linked, ATAC complex, YEATS2-linked	15|18|22|16	71	17.75	4	3|3|9|3|8|3|3|1|3|1|2|4|3|1|2|1|3|0|1|0|1|2|0|1|0|0|3|6|0|0|2|4|0|0|0|0|0|0|0|0|4|0|1|1	0.99
E2F1	Q01094	ENSG00000101412	E2F	Q8IYH5	ZZZ3	ZZ-type zinc finger-containing protein 3	12	ATAC complex, GCN5-linked, ATAC complex, YEATS2-linked	21|19|28|23	91	22.75	4	4|6|18|4|16|6|7|1|4|3|6|6|5|2|5|3|3|0|0|1|3|3|0|3|2|0|7|12|1|2|4|4|3|0|3|3|1|1|0|0|12|7|3|4	0.95
E2F1	Q01094	ENSG00000101412	E2F	Q14186	TFDP1	Transcription factor Dp-1 (DRTF1-polypeptide 1) (DRTF1) (E2F dimerization partner 1)	10	E2F-6 complex, E2F5-RB2-DP1 complex, SMAD3/4-E2F4/5-p107-DP1 complex, SMAD3-E2F4/5-p107-DP1 complex, GABP(gamma)1-E2F1-DP1 complex, E2F-1-DP-1 complex, E2F-1-DP-1-cyclinA-CDK2 complex	16|22|27|25	90	22.5	4	5|3|1|1|1|2|3|3|6|5|1|0|1|0|0|0|0|0|0|0|0|0|0|0|0|0|1|2|1|0|4|2|0|0|0|0|0|0|0|0|1|1|0|1	1	X	X	X	X	X	X
E2F1	Q01094	ENSG00000101412	E2F	Q96ES7	SGF29	SAGA-associated factor 29 (Coiled-coil domain-containing protein 101) (SAGA complex-associated factor 29)	9	SAGA complex, GCN5-linked, ATAC complex, GCN5-linked, STAGA complex, SPT3-linked, ATAC complex, YEATS2-linked	5|6|6|5	22	5.5	4	2|2|3|2|4|2|3|2|2|2|2|2|0|1|1|0|2|0|1|1|2|0|1|0|0|0|1|1|0|0|3|0|0|0|0|0|2|1|0|0|2|3|2|1	0.9
E2F1	Q01094	ENSG00000101412	E2F	O75478	TAD2A	Transcriptional adapter 2-alpha (Transcriptional adapter 2-like) (ADA2-like protein)	9	PCAF complex, PCAF complex, ATAC complex, GCN5-linked, ATAC complex, YEATS2-linked	8|10|12|12	42	10.5	4	2|1|4|4|7|3|2|0|3|3|1|1|1|0|0|0|0|0|0|1|0|1|0|0|0|0|2|2|1|0|0|2|0|0|0|0|0|0|0|0|6|3|1|1	0.96
E2F1	Q01094	ENSG00000101412	E2F	Q9H8E8	CSR2B	Cysteine-rich protein 2-binding protein (CSRP2-binding protein) (ADA2A-containing complex subunit 2) (ATAC2) (CRP2-binding partner) (CRP2BP) (Lysine acetyltransferase 14)	8	ATAC complex, GCN5-linked, ATAC complex, YEATS2-linked	17|17|19|16	69	17.25	4	5|1|13|6|15|4|4|0|6|1|3|1|3|1|3|2|4|0|0|1|1|2|0|1|0|1|7|2|2|1|6|6|0|3|0|1|2|5|0|0|10|8|6|4	0.92
E2F1	Q01094	ENSG00000101412	E2F	O75528	TADA3	Transcriptional adapter 3 (ADA3 homolog) (hADA3) (STAF54) (Transcriptional adapter 3-like) (ADA3-like protein)	8	GCN5-TRRAP histone acetyltransferase complex, TFTC complex (TATA-binding protein-free TAF-II-containing complex), TFTC complex (TATA-binding protein-free TAF-II-containing complex), TFTC complex (TATA-binding protein-free TAF-II-containing complex), TFTC complex (TATA-binding protein-free TAF-II-containing complex), TFTC complex (TATA-binding protein-free TAF-II-containing complex), TFTC complex …	14|19|16|16	65	16.25	4	5|7|9|6|9|6|5|5|6|7|2|1|1|1|1|1|4|0|0|0|1|0|0|0|0|1|4|4|1|1|6|4|0|0|3|0|2|0|0|0|6|5|2|2	0.96
E2F1	Q01094	ENSG00000101412	E2F	P49207	RL34	60S ribosomal protein L34 (Large ribosomal subunit protein eL34)	6	Ribosome, cytoplasmic, 60S ribosomal subunit, cytoplasmic, TRBP containing complex (DICER, RPL7A, EIF6, MOV10 and subunits of the 60S ribosomal particle)	7|7|7|5	26	6.5	4	1|1|2|0|2|0|2|0|1|0|2|1|4|3|4|3|3|1|4|3|2|3|1|2|0|0|2|0|0|0|0|0|0|0|1|2|1|0|1|2|2|5|1|1	0.85
E2F1	Q01094	ENSG00000101412	E2F	Q9ULM3	YETS2	YEATS domain-containing protein 2	5	ATAC complex, GCN5-linked, ATAC complex, YEATS2-linked	65|61|75|62	263	65.75	4	30|27|41|28|50|23|25|16|27|18|25|15|11|6|19|13|23|7|11|13|14|13|2|4|7|13|27|25|13|12|15|24|7|12|14|14|10|20|0|0|29|31|8|12	0.75
E2F1	Q01094	ENSG00000101412	E2F	P06400	RB	Retinoblastoma-associated protein (p105-Rb) (pRb) (Rb) (pp110)	2	MRG15-PAM14-RB complex, MRG15-PAM14-RB complex, RB-E2F1 complex, Rb-tal-1-E2A-Lmo2-Ldb1 complex, DNMT1-RB1-HDAC1-E2F1 complex, RB1-HDAC1-BRG1 complex, Rb-HDAC1 complex, Rb-HDAC1 complex, RB1(hypophosphorylated)-E2F4 complex, RB-E2F1 complex, RB1-TFAP2A complex, Emerin complex 24, CEBPE-E2F1-RB1 complex, TRIM27-RB1 complex	17|13|21|19	70	17.5	4	0|1|0|0|0|0|2|1|1|0|0|0|0|0|0|0|0|0|0|0|0|0|0|0|0|0|0|0|0|0|0|0|0|0|0|0|0|0|0|0|0|0|0|0	1	X	X	X	X	X	X
E2F1	Q01094	ENSG00000101412	E2F	P20248	CCNA2	Cyclin-A2 (Cyclin-A) (Cyclin A)	1	RC complex (Replication competent complex), RC complex during S-phase of cell cycle, RC complex during G2/M-phase of cell cycle, E2F4-p107-cyclinA complex, E2F1-p107-cyclinA complex, CDK2-CCNA2 complex, CDC2-CCNA2 complex, CDC2-CCNA2-CDK2 complex	6|5|7|6	24	6	4	0|0|0|0|0|0|0|0|0|0|0|0|0|0|0|0|0|0|0|0|0|0|0|0|0|0|0|0|0|0|0|0|0|0|0|0|0|0|0|0|0|0|0|0	1	X	X	X	X	X	X
E2F1	Q01094	ENSG00000101412	E2F	O00716	E2F3	Transcription factor E2F3 (E2F-3)	1		3|4|3|2	12	3	4	0|0|0|0|0|0|0|0|0|0|0|0|0|0|0|0|0|0|0|0|0|0|0|0|0|0|0|0|0|0|0|1|0|0|0|0|0|0|0|0|0|0|0|0	0.98	X				X
E2F1	Q01094	ENSG00000101412	E2F	Q01094	E2F1	Transcription factor E2F1 (E2F-1) (PBR3) (Retinoblastoma-associated protein 1) (RBAP-1) (Retinoblastoma-binding protein 3) (RBBP-3) (pRB-binding protein E2F-1)	1	RB-E2F1 complex, DNMT1-RB1-HDAC1-E2F1 complex, GABP(gamma)1-E2F1-DP1 complex, RB-E2F1 complex, E2F1-p107-cyclinA complex, CEBPE-E2F1-RB1 complex, E2F-1-DP-1 complex, E2F-1-DP-1-cyclinA-CDK2 complex	45|46|60|59	210	52.5	4	0|0|0|0|0|0|0|0|0|0|0|0|0|0|0|0|0|0|0|0|0|0|0|0|0|0|0|0|0|0|0|0|0|0|0|0|0|0|0|0|0|0|0|0	1	X	X
ELF1	P32519	ENSG00000120690	Ets	Q12857	NFIA	Nuclear factor 1 A-type (NF1-A) (Nuclear factor 1/A) (CCAAT-box-binding transcription factor) (CTF) (Nuclear factor I/A) (NF-I/A) (NFI-A) (TGGCA-binding protein)	54		3|5	8	4	2	4|2|3|0|0|0|3|0|3|0|0|0|1|0|0|0|0|0|0|0|0|0|0|0|0|0|1|0|0|3|3|0|0|0|0|0|0|0|0|0|0|1|0|0	0.77
ELF1	P32519	ENSG00000120690	Ets	P15822	ZEP1	Zinc finger protein 40 (Cirhin interaction protein) (CIRIP) (Gate keeper of apoptosis-activating protein) (GAAP) (Human immunodeficiency virus type I enhancer-binding protein 1) (HIV-EP1) (Major histocompatibility complex-binding protein 1) (MBP-1) (Positive regulatory domain II-binding factor 1) (PRDII-BF1)	52		4|5	9	4.5	2	1|1|1|1|0|2|2|0|1|1|0|0|0|0|0|0|0|0|0|0|0|0|0|2|0|0|1|1|0|0|1|2|0|0|0|0|0|0|0|0|1|0|0|0	0.99
ELF1	P32519	ENSG00000120690	Ets	Q86U86	PB1	Protein polybromo-1 (hPB1) (BRG1-associated factor 180) (BAF180) (Polybromo-1D)	48	PBAF complex (Polybromo- and BAF containing complex), PBAF complex (Polybromo- and BAF containing complex), PBAF complex (Polybromo- and BAF containing complex), PBAF complex (Polybromo- and BAF containing complex), PBAF complex (Polybromo- and BAF containing complex)	38|45	83	41.5	2	6|2|12|8|14|10|2|3|4|2|1|1|0|0|2|0|5|0|0|0|0|0|0|1|1|0|2|3|0|0|1|6|0|0|0|4|0|2|0|0|14|24|8|4	0.99
ELF1	P32519	ENSG00000120690	Ets	Q4LE39	ARI4B	AT-rich interactive domain-containing protein 4B (ARID domain-containing protein 4B) (180 kDa Sin3-associated polypeptide) (Sin3-associated polypeptide p180) (Breast cancer-associated antigen BRCAA1) (Histone deacetylase complex subunit SAP180) (Retinoblastoma-binding protein 1-like 1)	46	SAP complex (Sin3-associated protein complex), SAP complex (Sin3-associated protein complex), SIN3-HDAC-SAP30-ARID4 complex, SIN3-SAP25 complex, SIN3-HDAC-SAP30-ARID4 complex, BRMS1-RBP1 complex, SIN3-HDAC-SAP30-ARID4 complex, SIN3-ING1b complex I, SIN3-ING1b complex II, SIN3-SAP25 complex	13|10	23	11.5	2	3|4|3|0|1|1|1|0|1|1|3|2|2|1|0|3|2|0|1|1|2|2|2|2|0|0|2|1|2|1|3|4|0|0|2|0|0|0|0|0|2|3|1|1	1
ELF1	P32519	ENSG00000120690	Ets	P51531	SMCA2	Probable global transcription activator SNF2L2 (EC 3.6.4.-) (ATP-dependent helicase SMARCA2) (BRG1-associated factor 190B) (BAF190B) (Protein brahma homolog) (hBRM) (SNF2-alpha) (SWI/SNF-related matrix-associated actin-dependent regulator of chromatin subfamily A member 2)	46	BAF complex, SWI-SNF chromatin remodeling-related-BRCA1 complex, BAF complex, Brm-associated complex, BRM-SIN3A complex, BRM-SIN3A-HDAC complex, BRM-associated complex, WINAC complex, BAF complex, BAF complex, ALL-1 supercomplex, RNA polymerase II complex (RPB1, RAP74, CDK8, CYCC, SRB7, BAF190, BAF47), chromatin structure modifying, RNA polymerase II complex, chromatin structure modifying, RNA po…	20|18	38	19	2	19|18|19|10|23|14|19|7|20|11|2|0|0|0|0|0|0|0|0|0|0|0|0|0|0|0|0|9|0|0|0|0|0|0|0|0|0|0|0|0|14|13|0|0	0.77
ELF1	P32519	ENSG00000120690	Ets	Q9H582	ZN644	Zinc finger protein 644 (Zinc finger motif enhancer-binding protein 2) (Zep-2)	43		2|3	5	2.5	2	0|0|0|0|0|0|0|0|0|0|0|0|0|0|0|0|0|0|0|0|0|0|0|0|0|0|2|3|0|0|1|3|0|0|0|0|0|0|0|0|1|0|0|0	0.81
ELF1	P32519	ENSG00000120690	Ets	P0C7T5	ATX1L	Ataxin-1-like (Brother of ataxin-1) (Brother of ATXN1)	40		2|2	4	2	2	1|0|0|0|0|0|0|0|0|0|0|0|0|0|0|0|1|0|0|0|0|0|0|0|0|0|0|1|0|0|0|0|0|0|0|0|0|0|0|0|0|0|0|0	0.94
ELF1	P32519	ENSG00000120690	Ets	Q9NPI1	BRD7	Bromodomain-containing protein 7 (75 kDa bromodomain protein) (Protein CELTIX-1)	40		7|10	17	8.5	2	0|0|1|1|1|0|1|0|0|0|0|0|0|0|0|0|0|0|0|0|0|0|0|0|0|0|0|1|0|0|0|3|0|0|0|1|0|0|0|0|1|2|0|2	1
ELF1	P32519	ENSG00000120690	Ets	Q68CP9	ARID2	AT-rich interactive domain-containing protein 2 (ARID domain-containing protein 2) (BRG1-associated factor 200) (BAF200) (Zinc finger protein with activation potential) (Zipzap/p200)	39	PBAF complex (Polybromo- and BAF containing complex), PBAF complex (Polybromo- and BAF containing complex), PBAF complex (Polybromo- and BAF containing complex), PBAF complex (Polybromo- and BAF containing complex), PBAF complex (Polybromo- and BAF containing complex)	22|20	42	21	2	0|1|3|2|3|2|0|0|0|0|1|0|0|0|0|0|1|0|1|0|1|0|0|0|0|0|5|5|0|1|1|4|0|0|0|1|0|0|0|0|6|6|0|1	1
ELF1	P32519	ENSG00000120690	Ets	P13056	NR2C1	Nuclear receptor subfamily 2 group C member 1 (Orphan nuclear receptor TR2) (Testicular receptor 2)	36		5|5	10	5	2	2|2|0|0|0|0|1|0|0|1|0|0|0|0|0|0|0|0|0|0|0|0|0|0|0|1|0|1|0|0|1|0|0|0|0|0|0|0|0|0|0|0|1|0	1
ELF1	P32519	ENSG00000120690	Ets	Q8IWI9	MGAP	MAX gene-associated protein (MAX dimerization protein 5)	35	E2F-6 complex	29|23	52	26	2	2|1|4|0|4|0|2|0|2|0|1|2|2|1|1|0|1|0|1|1|0|0|0|0|0|0|11|10|0|1|8|11|0|0|0|2|0|3|0|0|4|8|0|0	0.99
ELF1	P32519	ENSG00000120690	Ets	O15164	TIF1A	Transcription intermediary factor 1-alpha (TIF1-alpha) (EC 2.3.2.27) (E3 ubiquitin-protein ligase TRIM24) (RING finger protein 82) (RING-type E3 ubiquitin transferase TIF1-alpha) (Tripartite motif-containing protein 24)	33		6|7	13	6.5	2	4|1|1|0|1|0|1|1|3|0|0|0|0|0|0|0|0|0|0|0|0|0|0|0|0|0|0|0|0|0|2|2|0|0|0|0|0|0|0|0|0|0|0|0	0.98
ELF1	P32519	ENSG00000120690	Ets	Q7Z3K3	POGZ	Pogo transposable element with ZNF domain (Suppressor of hairy wing homolog 5) (Zinc finger protein 280E) (Zinc finger protein 635)	29		11|11	22	11	2	1|1|2|0|2|0|0|0|1|2|1|1|1|1|0|0|0|0|0|0|0|0|0|0|0|0|2|4|1|0|0|1|0|0|0|0|0|0|0|0|2|2|0|0	1	X				X	X
ELF1	P32519	ENSG00000120690	Ets	Q5PSV4	BRM1L	Breast cancer metastasis-suppressor 1-like protein (BRMS1-homolog protein p40) (BRMS1-like protein p40)	29	ING2 complex	5|6	11	5.5	2	2|5|2|1|2|5|1|0|1|1|0|0|0|0|0|0|1|0|0|0|0|0|0|0|0|0|2|4|0|0|0|0|0|0|1|1|1|1|0|0|3|5|2|2	0.78
ELF1	P32519	ENSG00000120690	Ets	Q96L91	EP400	E1A-binding protein p400 (EC 3.6.4.-) (CAG repeat protein 32) (Domino homolog) (hDomino) (Trinucleotide repeat-containing gene 12 protein) (p400 kDa SWI2/SNF2-related protein)	28	NuA4/Tip60 HAT complex, NuA4/Tip60 HAT complex, NuA4/Tip60-HAT complex A, DMAP1-associated complex, p400-associated complex, NuA4/Tip60 HAT complex, NuA4/Tip60 HAT complex	22|16	38	19	2	1|5|7|5|7|4|4|1|2|3|4|2|1|1|2|2|2|0|2|2|2|2|1|2|0|0|7|15|1|0|1|9|0|0|1|1|0|1|0|0|13|10|3|1	0.94
ELF1	P32519	ENSG00000120690	Ets	O75461	E2F6	Transcription factor E2F6 (E2F-6)	26	E2F-6 complex, MLL1-WDR5 complex	4|4	8	4	2	0|1|0|1|0|0|1|0|1|1|0|0|0|0|0|0|0|0|0|0|0|0|0|0|0|0|2|1|0|0|0|2|0|0|0|0|0|0|0|0|0|1|0|0	0.99
ELF1	P32519	ENSG00000120690	Ets	Q969R5	LMBL2	Lethal(3)malignant brain tumor-like protein 2 (H-l(3)mbt-like protein 2) (L(3)mbt-like protein 2)	25	E2F-6 complex	6|6	12	6	2	0|0|0|0|0|0|0|0|0|0|0|0|0|0|0|0|0|0|0|0|0|0|0|0|0|0|1|2|0|0|0|0|0|0|0|0|0|0|0|0|0|0|0|0	1
ELF1	P32519	ENSG00000120690	Ets	Q9UQR1	ZN148	Zinc finger protein 148 (Transcription factor ZBP-89) (Zinc finger DNA-binding protein 89)	25		6|6	12	6	2	0|2|1|0|0|0|1|1|1|1|0|0|0|0|1|0|0|0|0|0|0|0|0|0|0|0|2|1|0|0|1|4|0|0|0|0|0|0|0|0|0|1|0|0	0.99
ELF1	P32519	ENSG00000120690	Ets	Q13610	PWP1	Periodic tryptophan protein 1 homolog (Keratinocyte protein IEF SSP 9502)	24	Nop56p-associated pre-rRNA complex	3|4	7	3.5	2	0|0|1|1|1|0|0|0|0|0|1|0|0|0|0|0|0|0|0|0|0|0|0|0|0|0|0|1|0|0|0|0|0|0|0|0|1|1|0|0|1|1|2|1	0.95	X				X
ELF1	P32519	ENSG00000120690	Ets	P85037	FOXK1	Forkhead box protein K1 (Myocyte nuclear factor) (MNF)	24		3|5	8	4	2	1|1|0|0|0|0|0|0|1|0|0|0|0|0|0|0|0|0|0|0|0|0|0|0|0|0|1|0|0|0|0|0|0|0|0|0|0|0|0|0|0|0|0|0	0.99
ELF1	P32519	ENSG00000120690	Ets	Q15906	VPS72	Vacuolar protein sorting-associated protein 72 homolog (Protein YL-1) (Transcription factor-like 1)	23	SRCAP-associated chromatin remodeling complex, NuA4/Tip60 HAT complex, DMAP1-associated complex	3|4	7	3.5	2	2|1|0|0|2|0|0|0|1|0|0|0|0|0|0|0|0|0|0|0|0|0|0|0|0|0|1|2|0|0|0|2|0|0|0|0|0|0|0|0|1|2|0|0	0.91
ELF1	P32519	ENSG00000120690	Ets	Q9Y6X8	ZHX2	Zinc fingers and homeoboxes protein 2 (Alpha-fetoprotein regulator 1) (AFP regulator 1) (Regulator of AFP) (Zinc finger and homeodomain protein 2)	23		4|3	7	3.5	2	2|3|0|0|0|0|3|0|3|3|0|0|0|0|0|0|0|0|0|0|0|0|0|0|0|0|1|1|0|0|1|1|0|0|0|0|0|0|0|0|0|0|0|0	0.8
ELF1	P32519	ENSG00000120690	Ets	Q92560	BAP1	Ubiquitin carboxyl-terminal hydrolase BAP1 (EC 3.4.19.12) (BRCA1-associated protein 1) (Cerebral protein 6)	22		15|16	31	15.5	2	1|1|1|2|0|0|1|0|1|0|0|0|0|0|0|1|0|0|0|0|0|0|0|0|0|0|2|3|0|0|0|0|0|0|0|0|0|0|0|0|1|1|0|0	1
ELF1	P32519	ENSG00000120690	Ets	Q6MZP7	LIN54	Protein lin-54 homolog (CXC domain-containing protein 1)	22	LINC complex, S-phase, LINC core complex, LINC complex, quiescent cells	14|14	28	14	2	8|7|4|1|2|2|4|1|9|4|0|1|0|0|0|0|1|0|0|0|0|0|0|0|0|0|11|5|1|1|9|9|1|0|2|2|1|0|0|0|7|4|0|2	0.9
ELF1	P32519	ENSG00000120690	Ets	Q96QT6	PHF12	PHD finger protein 12 (PHD factor 1) (Pf1)	22		16|15	31	15.5	2	1|0|2|0|3|1|2|0|1|0|1|3|2|0|3|1|1|0|1|1|1|1|0|0|0|0|0|5|0|0|0|3|0|0|0|0|0|0|0|0|2|3|0|0	1
ELF1	P32519	ENSG00000120690	Ets	P25490	TYY1	Transcriptional repressor protein YY1 (Delta transcription factor) (INO80 complex subunit S) (NF-E1) (Yin and yang 1) (YY-1)	21	Polycomb repressive complex 1 (PRC1, hPRC-H), Ku antigen-YY1-alphaMyHC promoter complex, YY1-Notch1-RBP-Jkappa complex, YY1-Notch1 complex, hs4 enhancer complex (faster migrating complex), hs4 enhancer complex (slow migrating complex), YY1-MDM2-p53 complex, EED-EZH-YY1 polycomb complex	3|4	7	3.5	2	1|2|0|0|2|0|1|0|0|0|0|0|0|0|0|0|0|0|0|0|0|0|0|0|0|1|0|0|0|0|2|1|0|0|0|0|0|0|0|0|0|0|0|0	0.95	X				X	X
ELF1	P32519	ENSG00000120690	Ets	Q7Z589	EMSY	BRCA2-interacting transcriptional repressor EMSY	21	NIF-1-DBC1-EMSY complex	20|19	39	19.5	2	3|3|6|2|4|3|4|2|3|3|0|0|0|0|4|0|3|0|2|1|2|1|1|1|0|0|10|14|0|1|2|6|1|0|1|1|0|1|0|0|6|5|2|1	0.98
ELF1	P32519	ENSG00000120690	Ets	Q8WUU5	GATD1	GATA zinc finger domain-containing protein 1 (Ocular development-associated gene protein)	21		8|8	16	8	2	1|3|1|2|0|1|1|1|1|1|0|0|0|0|0|0|0|0|0|0|0|0|0|0|0|0|0|0|0|0|0|2|0|0|0|1|0|0|0|0|1|2|0|1	1
ELF1	P32519	ENSG00000120690	Ets	Q8WUB8	PHF10	PHD finger protein 10 (BRG1-associated factor 45a) (BAF45a) (XAP135)	21		4|6	10	5	2	2|1|0|0|0|1|1|1|2|1|0|0|1|0|1|0|0|0|1|0|0|0|0|0|0|0|1|2|0|0|2|2|0|0|0|0|0|0|0|0|2|5|1|0	0.88
ELF1	P32519	ENSG00000120690	Ets	Q5VZL5	ZMYM4	Zinc finger MYM-type protein 4 (Zinc finger protein 262)	21		33|31	64	32	2	4|3|8|3|8|1|5|0|4|0|0|0|0|0|0|1|1|0|0|0|0|0|0|0|0|0|7|10|1|1|12|16|1|1|5|4|0|2|0|0|10|8|2|3	0.99
ELF1	P32519	ENSG00000120690	Ets	Q15291	RBBP5	Retinoblastoma-binding protein 5 (RBBP-5) (Retinoblastoma-binding protein RBQ-3)	20	Menin-associated histone methyltransferase complex, MLL-HCF complex, ALL-1 supercomplex, WDR5-ASH2L-RBBP5-MLL2 complex, ASCOM complex, MOF complex, Set1B complex, Set1A complex, UTX-MLL2/3 complex, PTIP-HMT complex, MLL1-WDR5 complex, PITX2-MLL4-ASH2L-RBBP5-PTIP complex, MLL1 core complex, MLL2 complex, MLL3 complex, MLL1 complex, MLL4 complex, Set1A complex, Set1B complex, CUL4A-DDB1-RBBP5 compl…	17|18	35	17.5	2	6|6|6|4|9|6|5|3|4|4|2|0|0|0|1|1|4|0|0|0|1|0|0|0|0|1|2|3|0|0|4|3|0|0|0|1|0|0|0|0|2|0|0|2	0.99
ELF1	P32519	ENSG00000120690	Ets	P49848	TAF6	Transcription initiation factor TFIID subunit 6 (RNA polymerase II TBP-associated factor subunit E) (Transcription initiation factor TFIID 70 kDa subunit) (TAF(II)70) (TAFII-70) (TAFII70) (Transcription initiation factor TFIID 80 kDa subunit) (TAF(II)80) (TAFII-80) (TAFII80)	18	TFIID complex, TFTC complex (TATA-binding protein-free TAF-II-containing complex), TFTC complex (TATA-binding protein-free TAF-II-containing complex), TFTC complex (TATA-binding protein-free TAF-II-containing complex), TFTC complex (TATA-binding protein-free TAF-II-containing complex), TFTC complex (TATA-binding protein-free TAF-II-containing complex), TFIID complex, TFIID-beta complex, TFTC comp…	29|23	52	26	2	5|5|8|3|8|4|5|1|7|3|2|1|1|1|0|0|2|0|1|0|0|1|0|0|0|1|3|3|3|3|8|9|0|1|2|1|0|0|0|0|5|3|3|2	1
ELF1	P32519	ENSG00000120690	Ets	Q76L83	ASXL2	Putative Polycomb group protein ASXL2 (Additional sex combs-like protein 2)	17		4|7	11	5.5	2	2|1|0|1|0|0|0|0|1|1|0|0|0|0|0|0|0|0|0|0|0|0|0|0|0|0|0|0|0|0|0|0|0|0|0|0|0|0|0|0|1|0|0|0	1
ELF1	P32519	ENSG00000120690	Ets	Q6P4R8	NFRKB	Nuclear factor related to kappa-B-binding protein (DNA-binding protein R kappa-B) (INO80 complex subunit G)	17	INO80 chromatin remodeling complex	3|7	10	5	2	0|0|0|0|0|0|0|0|0|0|0|0|0|0|0|0|0|0|0|0|0|0|0|0|0|0|0|3|0|0|0|0|0|0|0|0|0|0|0|0|0|0|0|0	0.99
ELF1	P32519	ENSG00000120690	Ets	Q9NW13	RBM28	RNA-binding protein 28 (RNA-binding motif protein 28)	17	Parvulin-associated pre-rRNP complex, Nop56p-associated pre-rRNA complex	7|5	12	6	2	1|1|5|1|2|2|2|3|2|2|0|0|0|0|0|0|0|0|0|0|0|0|0|0|0|0|1|2|0|0|0|0|0|0|0|0|0|1|0|0|3|4|3|2	0.87
ELF1	P32519	ENSG00000120690	Ets	O95793	STAU1	Double-stranded RNA-binding protein Staufen homolog 1	17	IGF2BP1 complex	4|4	8	4	2	1|0|0|1|0|0|0|0|0|0|3|3|2|0|1|1|2|0|0|1|0|2|0|0|1|0|0|1|1|0|0|0|1|0|1|0|0|1|0|0|0|1|4|3	0.77
ELF1	P32519	ENSG00000120690	Ets	Q9H2F5	EPC1	Enhancer of polycomb homolog 1	15	NuA4/Tip60 HAT complex, NuA4/Tip60 HAT complex, NuA4/Tip60-HAT complex B, NuA4/Tip60-HAT complex A, DMAP1-associated complex, NuA4/Tip60 HAT complex, NuA4/Tip60 HAT complex	3|3	6	3	2	0|0|1|0|1|0|0|0|0|0|0|0|0|0|0|0|0|0|1|1|0|0|0|1|0|0|0|0|0|0|0|0|0|0|0|0|0|0|0|0|1|4|0|0	0.89
ELF1	P32519	ENSG00000120690	Ets	Q9UMN6	KMT2B	Histone-lysine N-methyltransferase 2B (Lysine N-methyltransferase 2B) (EC 2.1.1.43) (Myeloid/lymphoid or mixed-lineage leukemia protein 4) (Trithorax homolog 2) (WW domain-binding protein 7) (WBP-7)	15	Menin-associated histone methyltransferase complex, PTIP-HMT complex	28|29	57	28.5	2	9|11|1|1|4|4|7|2|6|6|0|0|0|0|0|0|0|0|0|0|0|0|0|0|0|1|5|6|0|0|3|7|0|0|0|0|0|0|0|0|0|0|0|0	1
ELF1	P32519	ENSG00000120690	Ets	Q06546	GABPA	GA-binding protein alpha chain (GABP subunit alpha) (Nuclear respiratory factor 2 subunit alpha) (Transcription factor E4TF1-60)	14		7|8	15	7.5	2	2|1|1|2|1|0|2|0|1|0|0|0|0|0|2|0|0|0|0|0|0|0|0|0|0|0|0|0|1|0|0|5|0|0|0|0|0|0|0|0|2|1|0|0	0.99	X				X	X
ELF1	P32519	ENSG00000120690	Ets	Q14683	SMC1A	Structural maintenance of chromosomes protein 1A (SMC protein 1A) (SMC-1-alpha) (SMC-1A) (Sb1.8)	14	Cohesin-SA1 complex, Cohesin-SA2 complex, Cohesin-SA2 complex, Cohesin-SA1 complex, Cohesin-SA1 complex, Cohesin-SA2 complex, SNF2h-cohesin-NuRD complex, Sororin-cohesin complex, MDC1-p53BP1-SMC1 complex, SMC1-SMC3 complex, Sororin-cohesin complex, DDX11-RAD21-SMC1A-SMC3 complex	10|12	22	11	2	4|2|8|3|8|1|3|2|4|2|1|2|2|0|0|0|0|0|0|0|0|0|0|0|0|0|10|13|0|0|3|8|0|0|0|2|0|1|0|0|7|5|3|5	0.8	X				X
ELF1	P32519	ENSG00000120690	Ets	Q9UBL3	ASH2L	Set1/Ash2 histone methyltransferase complex subunit ASH2 (ASH2-like protein)	14	Menin-associated histone methyltransferase complex, MLL-HCF complex, WDR5-ASH2L-RBBP5-MLL2 complex, ASCOM complex, HCF-1 complex, Set1B complex, Set1A complex, UTX-MLL2/3 complex, PTIP-HMT complex, MLL1-WDR5 complex, PITX2-MLL4-ASH2L-RBBP5-PTIP complex, MLL1 core complex, MLL2 complex, MLL3 complex, MLL1 complex, MLL4 complex, Set1A complex, Set1B complex, NIF1-ASH2L-RBBP5-WDR5 complex, WRAD comp…	20|17	37	18.5	2	11|12|14|5|10|5|13|4|13|8|6|3|4|2|6|0|8|0|2|3|4|3|0|0|0|2|3|3|2|0|5|6|0|2|1|1|2|4|0|0|9|9|3|3	0.85
ELF1	P32519	ENSG00000120690	Ets	Q9HAV7	GRPE1	GrpE protein homolog 1, mitochondrial (HMGE) (Mt-GrpE#1)	14		3|5	8	4	2	0|0|1|1|3|1|1|0|0|0|0|0|0|1|0|0|0|0|0|1|0|1|1|0|0|0|0|0|0|0|0|0|0|1|0|0|0|0|0|0|0|0|0|1	0.95
ELF1	P32519	ENSG00000120690	Ets	Q92830	KAT2A	Histone acetyltransferase KAT2A (EC 2.3.1.48) (General control of amino acid synthesis protein 5-like 2) (Histone acetyltransferase GCN5) (hGCN5) (Histone succinyltransferase KAT2A) (EC 2.3.1.-) (Lysine acetyltransferase 2A) (STAF97)	14	GCN5-TRRAP histone acetyltransferase complex, TFTC-type histone acetyl transferase complex, TFTC complex (TATA-binding protein-free TAF-II-containing complex), TFTC complex (TATA-binding protein-free TAF-II-containing complex), TFTC complex (TATA-binding protein-free TAF-II-containing complex), TFTC complex (TATA-binding protein-free TAF-II-containing complex), TFTC complex (TATA-binding protein-…	6|7	13	6.5	2	2|2|1|3|6|5|1|0|4|1|0|0|0|0|0|0|1|0|0|0|0|0|0|0|0|0|0|0|0|0|1|1|0|0|0|1|0|0|0|0|1|0|1|1	0.91
ELF1	P32519	ENSG00000120690	Ets	Q9Y3B7	RM11	39S ribosomal protein L11, mitochondrial (L11mt) (MRP-L11) (Mitochondrial large ribosomal subunit protein uL11m)	14	55S ribosome, mitochondrial, 39S ribosomal subunit, mitochondrial	3|2	5	2.5	2	0|0|1|0|0|0|0|0|0|0|0|0|0|0|0|0|0|0|0|0|0|0|0|0|0|0|0|1|0|0|0|1|0|0|1|1|0|0|0|0|3|2|1|1	0.79
ELF1	P32519	ENSG00000120690	Ets	Q12830	BPTF	Nucleosome-remodeling factor subunit BPTF (Bromodomain and PHD finger-containing transcription factor) (Fetal Alz-50 clone 1 protein) (Fetal Alzheimer antigen)	13	hNURF complex, hNURF complex	11|14	25	12.5	2	8|7|3|1|1|1|2|2|4|3|2|0|0|0|2|1|2|0|0|0|1|0|1|1|0|0|6|3|0|0|3|2|0|0|0|0|0|0|0|0|1|1|0|1	0.97
ELF1	P32519	ENSG00000120690	Ets	Q92831	KAT2B	Histone acetyltransferase KAT2B (EC 2.3.1.48) (Histone acetyltransferase PCAF) (Histone acetylase PCAF) (Lysine acetyltransferase 2B) (P300/CBP-associated factor) (P/CAF)	13	Multisubunit ACTR coactivator complex, PCAF complex, PCAF complex, FOXO3-PCAF complex, oxidative stress stimulated, CREBBP-KAT2B-MYOD1 complex, Smad1-Notch1-p300-Pcaf complex, RNA polymerase II complex (CBP, PCAF, RPB1, BAF47, CYCC, CDK8), chromatin structure modifying, RNA polymerase II complex, incomplete (CBP, RPBI, PCAF, BAF47), chromatin structure modifying, RNA polymerase II complex, chroma…	2|3	5	2.5	2	0|0|0|0|0|0|0|0|0|0|0|0|0|0|0|0|0|0|0|0|0|0|0|0|0|0|0|3|0|0|0|0|0|0|0|0|0|0|0|0|0|0|0|0	0.95
ELF1	P32519	ENSG00000120690	Ets	Q9BYE7	PCGF6	Polycomb group RING finger protein 6 (Mel18 and Bmi1-like RING finger) (RING finger protein 134)	13	E2F-6 complex	3|6	9	4.5	2	2|0|1|1|1|1|0|0|0|0|1|1|0|0|0|0|0|0|0|0|0|0|0|0|0|0|3|2|0|0|1|2|0|0|1|0|0|1|0|0|0|0|0|0	0.9
ELF1	P32519	ENSG00000120690	Ets	Q71UM5	RS27L	40S ribosomal protein S27-like (Small ribosomal subunit protein eS27-like)	13		2|3	5	2.5	2	0|0|3|0|0|0|0|0|0|0|0|0|0|0|0|0|0|0|0|0|0|0|0|0|0|0|0|0|0|0|0|0|0|0|0|0|0|0|0|0|0|0|2|2	0.9
ELF1	P32519	ENSG00000120690	Ets	O15047	SET1A	Histone-lysine N-methyltransferase SETD1A (EC 2.1.1.43) (Lysine N-methyltransferase 2F) (SET domain-containing protein 1A) (hSET1A) (Set1/Ash2 histone methyltransferase complex subunit SET1)	13	MOF complex, HCF-1 complex, Set1A complex, Set1A complex	46|48	94	47	2	11|11|9|4|7|5|4|3|7|3|2|1|1|1|0|0|0|0|0|1|1|1|0|0|1|0|7|3|2|0|7|5|0|0|0|1|0|1|0|0|4|4|1|0	1
ELF1	P32519	ENSG00000120690	Ets	A6NHR9	SMHD1	Structural maintenance of chromosomes flexible hinge domain-containing protein 1 (SMC hinge domain-containing protein 1)	13		16|25	41	20.5	2	9|8|7|6|7|8|8|3|4|3|1|1|1|1|0|0|0|0|0|0|0|0|0|0|0|0|7|5|2|1|13|13|0|0|1|1|1|0|0|0|10|10|5|5	0.92
ELF1	P32519	ENSG00000120690	Ets	Q7L2E3	DHX30	Putative ATP-dependent RNA helicase DHX30 (EC 3.6.4.13) (DEAH box protein 30)	12	H2AX complex I, protein complex (DDX28; DHX30; GRSF1; FASTKD2; FASTKD5)	4|5	9	4.5	2	1|0|3|1|2|1|0|0|0|1|1|0|0|0|1|0|0|0|0|0|0|1|0|0|0|0|0|0|0|0|0|0|0|0|0|0|0|0|0|3|2|0|5|6	0.79
ELF1	P32519	ENSG00000120690	Ets	Q5VWG9	TAF3	Transcription initiation factor TFIID subunit 3 (140 kDa TATA box-binding protein-associated factor) (TBP-associated factor 3) (Transcription initiation factor TFIID 140 kDa subunit) (TAF(II)140) (TAF140) (TAFII-140) (TAFII140)	12	DA complex, DAB complex	8|9	17	8.5	2	1|1|0|1|1|0|0|0|0|0|0|0|0|0|0|0|0|0|0|1|0|0|0|0|0|0|2|3|0|0|1|1|0|0|0|0|0|0|0|0|1|1|0|0	1
ELF1	P32519	ENSG00000120690	Ets	O00268	TAF4	Transcription initiation factor TFIID subunit 4 (RNA polymerase II TBP-associated factor subunit C) (TBP-associated factor 4) (Transcription initiation factor TFIID 130 kDa subunit) (TAF(II)130) (TAFII-130) (TAFII130) (Transcription initiation factor TFIID 135 kDa subunit) (TAF(II)135) (TAFII-135) (TAFII135)	12	TFIID complex, TFTC complex (TATA-binding protein-free TAF-II-containing complex), TFTC complex (TATA-binding protein-free TAF-II-containing complex), TFTC complex (TATA-binding protein-free TAF-II-containing complex), TFTC complex (TATA-binding protein-free TAF-II-containing complex), TFTC complex (TATA-binding protein-free TAF-II-containing complex), TFIID complex, TFIID-beta complex, TFTC comp…	16|15	31	15.5	2	1|3|8|4|12|7|2|1|1|0|1|0|0|0|0|0|0|0|0|0|0|1|0|0|0|0|10|11|0|0|4|6|0|0|1|0|0|0|0|0|5|2|0|1	0.94
ELF1	P32519	ENSG00000120690	Ets	Q15542	TAF5	Transcription initiation factor TFIID subunit 5 (Transcription initiation factor TFIID 100 kDa subunit) (TAF(II)100) (TAFII-100) (TAFII100)	12	TFIID complex, TFTC complex (TATA-binding protein-free TAF-II-containing complex), TFTC complex (TATA-binding protein-free TAF-II-containing complex), TFTC complex (TATA-binding protein-free TAF-II-containing complex), TFTC complex (TATA-binding protein-free TAF-II-containing complex), TFTC complex (TATA-binding protein-free TAF-II-containing complex), TFIID complex, TFIID-beta complex, TFTC comp…	19|19	38	19	2	6|7|10|6|8|4|4|2|5|2|1|0|1|0|0|0|0|0|0|0|0|0|0|0|0|0|1|4|0|0|5|4|0|0|0|1|0|1|0|0|2|3|0|1	0.99
ELF1	P32519	ENSG00000120690	Ets	Q9Y4A5	TRRAP	Transformation/transcription domain-associated protein (350/400 kDa PCAF-associated factor) (PAF350/400) (STAF40) (Tra1 homolog)	12	GCN5-TRRAP histone acetyltransferase complex, TFTC-type histone acetyl transferase complex, TFTC complex (TATA-binding protein-free TAF-II-containing complex), TFTC complex (TATA-binding protein-free TAF-II-containing complex), TFTC complex (TATA-binding protein-free TAF-II-containing complex), TFTC complex (TATA-binding protein-free TAF-II-containing complex), TFTC complex (TATA-binding protein-…	4|2	6	3	2	0|0|2|1|2|0|2|0|0|0|0|0|0|0|0|0|0|0|0|0|0|0|0|0|0|0|0|0|0|0|0|1|1|0|0|0|0|0|0|0|0|0|0|0	0.86
ELF1	P32519	ENSG00000120690	Ets	P52739	ZN131	Zinc finger protein 131	12		12|14	26	13	2	4|4|11|2|9|3|4|2|5|2|2|2|2|2|1|2|1|0|0|0|0|0|1|0|1|1|0|3|2|0|6|6|0|0|1|0|0|0|0|0|3|0|0|0	0.94
ELF1	P32519	ENSG00000120690	Ets	Q8IYH5	ZZZ3	ZZ-type zinc finger-containing protein 3	12	ATAC complex, GCN5-linked, ATAC complex, YEATS2-linked	16|16	32	16	2	4|6|18|4|16|6|7|1|4|3|6|6|5|2|5|3|3|0|0|1|3|3|0|3|2|0|7|12|1|2|4|4|3|0|3|3|1|1|0|0|12|7|3|4	0.77
ELF1	P32519	ENSG00000120690	Ets	Q01167	FOXK2	Forkhead box protein K2 (Cellular transcription factor ILF-1) (FOXK1) (Interleukin enhancer-binding factor 1)	11		5|7	12	6	2	2|3|2|1|0|0|3|2|4|3|0|0|0|0|0|0|0|0|0|0|0|0|0|0|0|0|2|0|0|0|1|2|0|0|0|0|0|0|0|0|0|0|0|0	0.93
ELF1	P32519	ENSG00000120690	Ets	Q9P2N6	KANL3	KAT8 regulatory NSL complex subunit 3 (NSL complex protein NSL3) (Non-specific lethal 3 homolog) (Serum inhibited-related protein) (Testis development protein PRTD)	11		14|17	31	15.5	2	0|1|0|1|1|2|1|1|1|0|0|0|0|0|0|0|0|0|0|0|0|0|0|0|0|0|1|1|0|1|0|2|0|0|0|0|0|0|0|0|0|1|0|0	1
ELF1	P32519	ENSG00000120690	Ets	Q03164	KMT2A	Histone-lysine N-methyltransferase 2A (Lysine N-methyltransferase 2A) (EC 2.1.1.43) (ALL-1) (CXXC-type zinc finger protein 7) (Myeloid/lymphoid or mixed-lineage leukemia) (Myeloid/lymphoid or mixed-lineage leukemia protein 1) (Trithorax-like protein) (Zinc finger protein HRX) [Cleaved into: MLL cleavage product N320 (N-terminal cleavage product of 320 kDa) (p320); MLL cleavage product C180 (C-ter…	11	MLL-HCF complex, ALL-1 supercomplex, MOF complex, MLL1-WDR5 complex, MLL1 core complex, MLL1 complex, MWRAD complex (MLL1, WDR5, RBBP5, ASH2L, DPY30)	13|11	24	12	2	2|1|1|1|2|1|0|1|1|2|1|1|0|1|1|0|1|0|1|0|0|0|0|0|0|0|1|8|1|0|2|7|0|0|1|0|0|1|0|0|1|0|0|0	0.99
ELF1	P32519	ENSG00000120690	Ets	O60264	SMCA5	SWI/SNF-related matrix-associated actin-dependent regulator of chromatin subfamily A member 5 (SWI/SNF-related matrix-associated actin-dependent regulator of chromatin A5) (EC 3.6.4.-) (Sucrose nonfermenting protein 2 homolog) (hSNF2H)	11	DNMT3B complex, SNF2H-BAZ1A complex, Polycomb repressive complex 1 (PRC1, hPRC-H), Polycomb repressive complex 1 (PRC1, hPRC-H), HuCHRAC complex, WICH complex, SNF2h-cohesin-NuRD complex, Remodeling and spacing factor (RSF) complex, SNF2H-BAZ1A complex, CEN complex, ALL-1 supercomplex, SNF2h-HDAC12 complex, Nucleolar remodeling complex (NoRC complex), B-WICH complex, B-WICH complex	12|9	21	10.5	2	10|6|4|5|8|4|1|3|2|2|0|1|0|0|1|0|3|0|0|0|0|0|0|0|0|2|4|6|0|0|2|2|0|0|0|0|0|0|0|0|4|4|0|3	0.86
ELF1	P32519	ENSG00000120690	Ets	Q9P0U4	CXXC1	CXXC-type zinc finger protein 1 (CpG-binding protein) (PHD finger and CXXC domain-containing protein 1)	10	Set1B complex, Set1A complex, Set1A complex, Set1B complex	12|15	27	13.5	2	5|3|3|1|7|1|4|0|5|0|1|0|0|1|0|0|0|0|0|0|0|0|0|0|0|0|0|0|0|0|4|2|0|0|0|0|0|0|0|0|1|0|0|0	0.99
ELF1	P32519	ENSG00000120690	Ets	Q9H160	ING2	Inhibitor of growth protein 2 (Inhibitor of growth 1-like protein) (ING1Lp) (p32) (p33ING2)	10	ING2 complex	3|3	6	3	2	0|0|0|0|0|0|0|0|0|0|0|0|0|0|0|0|0|0|0|0|0|0|0|0|0|0|1|1|0|0|0|0|0|0|0|0|0|0|0|0|0|0|0|0	0.99
ELF1	P32519	ENSG00000120690	Ets	Q16514	TAF12	Transcription initiation factor TFIID subunit 12 (Transcription initiation factor TFIID 20/15 kDa subunits) (TAFII-20/TAFII-15) (TAFII20/TAFII15)	10	TFTC complex (TATA-binding protein-free TAF-II-containing complex), TFTC complex (TATA-binding protein-free TAF-II-containing complex), TFTC complex (TATA-binding protein-free TAF-II-containing complex), TFTC complex (TATA-binding protein-free TAF-II-containing complex), TFTC complex (TATA-binding protein-free TAF-II-containing complex), TFIID complex, TFIID-beta complex, TFTC complex (TATA-bindi…	4|4	8	4	2	0|0|2|0|1|0|0|0|0|0|0|0|0|0|0|0|0|0|0|0|0|0|0|0|0|0|3|2|0|0|0|0|0|0|0|0|0|0|0|0|1|1|1|0	0.96
ELF1	P32519	ENSG00000120690	Ets	Q13011	ECH1	Delta(3,5)-Delta(2,4)-dienoyl-CoA isomerase, mitochondrial (EC 5.3.3.-)	9		11|7	18	9	2	1|1|1|1|3|4|2|1|0|0|0|0|0|1|0|0|0|0|0|0|0|0|0|0|0|0|0|0|0|0|1|0|2|0|2|1|5|1|6|7|6|1|7|7	0.84
ELF1	P32519	ENSG00000120690	Ets	Q05BQ5	MBTD1	MBT domain-containing protein 1	9		4|2	6	3	2	0|0|0|0|0|0|0|0|0|0|0|0|0|0|0|0|0|0|0|0|0|0|0|0|0|0|0|0|0|0|0|0|0|0|0|0|0|0|0|0|1|1|0|0	0.97
ELF1	P32519	ENSG00000120690	Ets	Q96ES7	SGF29	SAGA-associated factor 29 (Coiled-coil domain-containing protein 101) (SAGA complex-associated factor 29)	9	SAGA complex, GCN5-linked, ATAC complex, GCN5-linked, STAGA complex, SPT3-linked, ATAC complex, YEATS2-linked	7|7	14	7	2	2|2|3|2|4|2|3|2|2|2|2|2|0|1|1|0|2|0|1|1|2|0|1|0|0|0|1|1|0|0|3|0|0|0|0|0|2|1|0|0|2|3|2|1	0.99
ELF1	P32519	ENSG00000120690	Ets	Q6ZRS2	SRCAP	Helicase SRCAP (EC 3.6.4.-) (Domino homolog 2) (Snf2-related CBP activator)	9	SRCAP-associated chromatin remodeling complex, DMAP1-associated complex, NCOR1 complex	22|21	43	21.5	2	9|9|4|5|10|7|9|6|7|4|0|0|0|0|1|0|3|0|0|0|0|0|1|1|1|0|6|10|1|0|1|5|0|1|1|3|0|1|0|0|3|5|0|0	0.98
ELF1	P32519	ENSG00000120690	Ets	O75478	TAD2A	Transcriptional adapter 2-alpha (Transcriptional adapter 2-like) (ADA2-like protein)	9	PCAF complex, PCAF complex, ATAC complex, GCN5-linked, ATAC complex, YEATS2-linked	6|7	13	6.5	2	2|1|4|4|7|3|2|0|3|3|1|1|1|0|0|0|0|0|0|1|0|1|0|0|0|0|2|2|1|0|0|2|0|0|0|0|0|0|0|0|6|3|1|1	0.8
ELF1	P32519	ENSG00000120690	Ets	Q9ULG1	INO80	DNA helicase INO80 (hINO80) (EC 3.6.4.12) (INO80 complex subunit A) (Putative DNA helicase INO80 complex homolog 1)	8	INO80 chromatin remodeling complex	7|6	13	6.5	2	0|0|0|0|0|0|0|0|0|0|0|0|0|0|0|0|0|0|0|0|0|1|0|0|0|0|0|0|0|0|0|0|0|0|0|0|0|0|0|0|1|2|0|0	1
ELF1	P32519	ENSG00000120690	Ets	Q9H9L4	KANL2	KAT8 regulatory NSL complex subunit 2 (NSL complex protein NSL2) (Non-specific lethal 2 homolog)	8		11|10	21	10.5	2	0|1|0|1|1|0|0|0|0|0|0|1|0|0|0|0|0|0|0|0|0|0|0|0|0|0|0|1|0|0|0|0|0|0|0|0|0|0|0|0|1|0|0|0	1
ELF1	P32519	ENSG00000120690	Ets	Q96EZ8	MCRS1	Microspherule protein 1 (58 kDa microspherule protein) (Cell cycle-regulated factor p78) (INO80 complex subunit J) (MCRS2)	8	INO80 chromatin remodeling complex, DIPA-MCRS1 complex, MLL1-WDR5 complex, MSP58-RINT1 complex	9|9	18	9	2	0|1|0|0|0|0|2|0|2|1|0|0|0|0|0|0|0|0|0|0|0|0|0|0|0|0|2|0|0|0|0|0|0|0|0|0|0|0|0|0|0|0|0|0	1
ELF1	P32519	ENSG00000120690	Ets	Q9GZN1	ARP6	Actin-related protein 6 (hArp6) (hARPX)	7	SRCAP-associated chromatin remodeling complex	5|4	9	4.5	2	1|2|0|0|1|1|1|1|1|1|0|0|0|0|0|0|0|0|0|0|0|0|0|0|0|0|0|0|0|0|0|0|0|0|0|0|0|0|0|0|0|0|0|0	1
ELF1	P32519	ENSG00000120690	Ets	P32519	ELF1	ETS-related transcription factor Elf-1 (E74-like factor 1)	7		41|44	85	42.5	2	0|0|0|0|0|0|0|0|0|0|0|0|0|0|0|0|0|0|0|0|0|0|0|0|0|0|1|0|0|0|0|0|0|0|0|0|0|0|0|0|0|0|0|0	1
ELF1	P32519	ENSG00000120690	Ets	Q7Z3B3	KANL1	KAT8 regulatory NSL complex subunit 1 (MLL1/MLL complex subunit KANSL1) (MSL1 homolog 1) (hMSL1v1) (NSL complex protein NSL1) (Non-specific lethal 1 homolog)	7	MSL complex, MLL1-WDR5 complex	21|23	44	22	2	1|2|1|1|1|0|1|0|0|0|0|0|0|0|0|0|0|0|0|0|0|0|0|0|0|0|1|2|0|0|0|0|0|0|0|0|0|0|0|0|0|0|0|0	1
ELF1	P32519	ENSG00000120690	Ets	P62269	RS18	40S ribosomal protein S18 (Ke-3) (Ke3) (Small ribosomal subunit protein uS13)	7	40S ribosomal subunit, cytoplasmic, Ribosome, cytoplasmic, 40S ribosomal subunit, cytoplasmic, Nop56p-associated pre-rRNA complex	11|9	20	10	2	4|4|11|2|7|2|6|2|8|2|0|1|0|0|4|3|4|4|2|2|2|3|0|0|0|2|1|1|0|1|1|0|0|0|0|0|1|0|1|0|2|0|2|5	0.82
ELF1	P32519	ENSG00000120690	Ets	Q6P1X5	TAF2	Transcription initiation factor TFIID subunit 2 (150 kDa cofactor of initiator function) (RNA polymerase II TBP-associated factor subunit B) (TBP-associated factor 150 kDa) (Transcription initiation factor TFIID 150 kDa subunit) (TAF(II)150) (TAFII-150) (TAFII150)	7	TFIID complex, TFTC complex (TATA-binding protein-free TAF-II-containing complex), TFTC complex (TATA-binding protein-free TAF-II-containing complex), TFTC complex (TATA-binding protein-free TAF-II-containing complex), TFTC complex (TATA-binding protein-free TAF-II-containing complex), TFTC complex (TATA-binding protein-free TAF-II-containing complex), TFIID-beta complex, TFTC complex (TATA-bindi…	12|9	21	10.5	2	0|0|1|2|1|1|1|0|0|0|0|0|0|0|0|0|0|0|0|0|0|0|0|0|0|0|0|0|0|0|0|0|0|0|0|0|0|0|0|0|0|0|0|0	1
ELF1	P32519	ENSG00000120690	Ets	P21675	TAF1	Transcription initiation factor TFIID subunit 1 (EC 2.3.1.48) (EC 2.7.11.1) (Cell cycle gene 1 protein) (TBP-associated factor 250 kDa) (p250) (Transcription initiation factor TFIID 250 kDa subunit) (TAF(II)250) (TAFII-250) (TAFII250)	6	TFIID complex, TFIID complex, TFIID-beta complex, TFIID complex, TFIID complex, B-cell specific, DA complex, DAB complex, TFIID complex, TFIID complex, TFIID-beta complex, ALL-1 supercomplex, Transcription initiation factor complex (TAF1, TAF5, TAF11, TAF12, TBP), MOF complex, TFIID complex, MLL1-WDR5 complex	11|12	23	11.5	2	6|3|0|4|5|4|4|3|3|3|0|0|0|0|0|0|0|0|0|0|0|0|0|0|0|0|3|5|0|0|0|3|0|0|0|0|0|0|0|0|0|4|0|0	0.97	X				X
ELF1	P32519	ENSG00000120690	Ets	Q9H9F9	ARP5	Actin-related protein 5 (hARP5) (Sarcoma antigen NY-SAR-16)	6	INO80 chromatin remodeling complex	3|3	6	3	2	0|0|0|0|1|1|0|0|0|1|0|0|0|0|0|0|0|0|0|0|0|0|0|0|0|0|0|0|0|0|0|0|0|0|0|0|0|0|0|0|0|0|0|0	0.99
ELF1	P32519	ENSG00000120690	Ets	Q9H7Z6	KAT8	Histone acetyltransferase KAT8 (EC 2.3.1.48) (Lysine acetyltransferase 8) (MOZ, YBF2/SAS3, SAS2 and TIP60 protein 1) (MYST-1) (hMOF)	6	MSL complex, MAF2 complex, MOF complex, MLL1-WDR5 complex	8|6	14	7	2	1|1|0|0|0|0|2|0|0|0|0|0|0|0|0|0|0|0|0|0|0|0|0|0|0|0|1|1|0|0|0|0|0|0|0|0|0|0|0|0|0|0|0|0	1
ELF1	P32519	ENSG00000120690	Ets	O95619	YETS4	YEATS domain-containing protein 4 (Glioma-amplified sequence 41) (Gas41) (NuMA-binding protein 1) (NuBI-1) (NuBI1)	6	SRCAP-associated chromatin remodeling complex, NuA4/Tip60 HAT complex, NuA4/Tip60 HAT complex, NuA4/Tip60-HAT complex A, NuA4/Tip60 HAT complex	5|6	11	5.5	2	3|5|4|3|4|2|3|2|4|3|1|0|0|0|1|0|1|0|0|0|1|0|0|0|0|0|1|2|0|1|3|2|0|0|0|0|0|0|0|0|2|2|0|0	0.74
ELF1	P32519	ENSG00000120690	Ets	Q9HCU9	BRMS1	Breast cancer metastasis-suppressor 1	5	BRMS1-SIN3-HDAC complex, BRMS1-RBP1 complex, ING2 complex	2|3	5	2.5	2	0|0|0|0|0|0|0|0|0|0|0|0|0|0|0|0|0|0|0|0|0|0|0|0|0|0|0|0|0|0|0|0|0|0|0|0|0|0|0|0|0|0|0|0	0.97
ELF1	P32519	ENSG00000120690	Ets	Q9UBU8	MO4L1	Mortality factor 4-like protein 1 (MORF-related gene 15 protein) (Protein MSL3-1) (Transcription factor-like protein MRG15)	5	NuA4/Tip60 HAT complex, NuA4/Tip60 HAT complex, MRG15-PAM14-RB complex, MRG15-PAM14-RB complex, MAF2 complex, NuA4/Tip60-HAT complex B, NuA4/Tip60-HAT complex A, NuA4/Tip60 HAT complex, NuA4/Tip60 HAT complex	3|3	6	3	2	1|2|0|0|0|0|1|1|2|2|0|0|0|0|0|0|0|0|0|0|0|0|0|0|0|0|0|0|0|0|0|0|0|0|0|0|0|0|0|0|0|0|0|1	0.92
ELF1	P32519	ENSG00000120690	Ets	P57052	RBM11	Splicing regulator RBM11 (RNA-binding motif protein 11)	5		3|2	5	2.5	2	0|0|1|1|1|0|0|0|0|0|0|0|0|0|0|1|0|0|0|0|0|0|0|0|0|0|0|0|0|0|0|0|0|0|0|0|0|0|0|0|2|0|1|1	0.92
ELF1	P32519	ENSG00000120690	Ets	Q8N1G0	ZN687	Zinc finger protein 687	5		8|8	16	8	2	1|2|6|1|6|1|3|0|3|0|3|1|1|0|0|1|1|0|0|1|0|0|0|1|0|0|2|3|1|0|3|5|1|0|0|0|0|0|0|0|2|2|0|0	0.92
ELF1	P32519	ENSG00000120690	Ets	Q5T3J3	LRIF1	Ligand-dependent nuclear receptor-interacting factor 1 (Receptor-interacting factor 1)	4		3|4	7	3.5	2	0|0|0|0|0|0|0|0|0|0|0|0|0|0|0|0|0|0|0|0|0|0|0|0|0|0|0|0|0|0|0|0|0|0|0|0|0|0|0|0|0|0|0|0	0.99
ELF1	P32519	ENSG00000120690	Ets	Q9Y5Z7	HCFC2	Host cell factor 2 (HCF-2) (C2 factor)	3	MLL2 complex, Set1A complex, Set1B complex	7|7	14	7	2	0|0|0|0|0|0|0|0|0|0|0|0|0|0|0|0|0|0|0|0|0|0|0|0|0|0|0|0|0|0|0|0|0|0|0|0|0|0|0|0|0|0|0|0	1
ELF1	P32519	ENSG00000120690	Ets	P20226	TBP	TATA-box-binding protein (TATA sequence-binding protein) (TATA-binding factor) (TATA-box factor) (Transcription initiation factor TFIID TBP subunit)	2	RNA polymerase II holoenzyme complex, TFIID complex, TFIID complex, TFIID-beta complex, TFIID complex, TFIID complex, B-cell specific, DA complex, DAB complex, TFIID complex, TFIID complex, TFIID-beta complex, HMG1-TBP-TATA complex, PU.1-TBP complex, 5S-DNA-TFIIIA-TFIIIC2-TFIIIB subcomplex, ALL-1 supercomplex, Transcription initiation factor complex (TAF1, TAF5, TAF11, TAF12, TBP), Transcription …	2|2	4	2	2	0|1|0|0|1|0|0|0|0|1|0|0|0|0|0|0|0|0|0|0|0|0|0|0|0|0|0|0|0|0|0|0|0|0|0|0|0|0|0|0|0|0|1|0	0.94	X				X
ELF1	P32519	ENSG00000120690	Ets	P18846	ATF1	Cyclic AMP-dependent transcription factor ATF-1 (cAMP-dependent transcription factor ATF-1) (Activating transcription factor 1) (Protein TREB36)	2		2|2	4	2	2	0|0|0|0|0|0|0|0|0|0|0|0|0|0|0|0|0|0|0|0|0|0|0|0|0|0|1|1|0|0|0|0|0|0|0|0|0|0|0|0|0|0|0|0	0.94
ELF1	P32519	ENSG00000120690	Ets	Q8NB78	KDM1B	Lysine-specific histone demethylase 1B (EC 1.-.-.-) (Flavin-containing amine oxidase domain-containing protein 1) (Lysine-specific histone demethylase 2)	2		2|2	4	2	2	0|1|0|0|1|1|0|0|0|0|0|0|0|0|0|0|0|0|0|0|0|0|0|0|0|0|0|0|0|0|0|0|0|0|0|0|0|0|0|0|0|0|0|0	0.94
ELF1	P32519	ENSG00000120690	Ets	P02768	ALBU	Serum albumin	1		13|15	28	14	2	0|0|0|0|0|0|0|0|0|0|0|0|0|0|0|0|0|0|0|0|0|0|0|0|0|0|0|0|0|0|0|0|0|0|0|0|0|0|0|0|0|0|0|0	1
ELF1	P32519	ENSG00000120690	Ets	P05109	S10A8	Protein S100-A8 (Calgranulin-A) (Calprotectin L1L subunit) (Cystic fibrosis antigen) (CFAG) (Leukocyte L1 complex light chain) (Migration inhibitory factor-related protein 8) (MRP-8) (p8) (S100 calcium-binding protein A8) (Urinary stone protein band A)	1	(S100A8/S100A9)2 heterotetramer, iNOS-S100A8/A9 complex	2|3	5	2.5	2	0|0|0|0|0|0|0|0|0|0|0|0|0|0|0|0|0|0|0|0|0|0|0|0|0|0|0|0|0|0|0|0|0|0|0|0|0|0|0|0|0|0|0|0	0.97
ELF2	Q15723	ENSG00000109381	Ets	P15822	ZEP1	Zinc finger protein 40 (Cirhin interaction protein) (CIRIP) (Gate keeper of apoptosis-activating protein) (GAAP) (Human immunodeficiency virus type I enhancer-binding protein 1) (HIV-EP1) (Major histocompatibility complex-binding protein 1) (MBP-1) (Positive regulatory domain II-binding factor 1) (PRDII-BF1)	52		16|12	28	14	2	1|1|1|1|0|2|2|0|1|1|0|0|0|0|0|0|0|0|0|0|0|0|0|2|0|0|1|1|0|0|1|2|0|0|0|0|0|0|0|0|1|0|0|0	1
ELF2	Q15723	ENSG00000109381	Ets	Q4LE39	ARI4B	AT-rich interactive domain-containing protein 4B (ARID domain-containing protein 4B) (180 kDa Sin3-associated polypeptide) (Sin3-associated polypeptide p180) (Breast cancer-associated antigen BRCAA1) (Histone deacetylase complex subunit SAP180) (Retinoblastoma-binding protein 1-like 1)	46	SAP complex (Sin3-associated protein complex), SAP complex (Sin3-associated protein complex), SIN3-HDAC-SAP30-ARID4 complex, SIN3-SAP25 complex, SIN3-HDAC-SAP30-ARID4 complex, BRMS1-RBP1 complex, SIN3-HDAC-SAP30-ARID4 complex, SIN3-ING1b complex I, SIN3-ING1b complex II, SIN3-SAP25 complex	39|40	79	39.5	2	3|4|3|0|1|1|1|0|1|1|3|2|2|1|0|3|2|0|1|1|2|2|2|2|0|0|2|1|2|1|3|4|0|0|2|0|0|0|0|0|2|3|1|1	1	X				X	X
ELF2	Q15723	ENSG00000109381	Ets	Q9H582	ZN644	Zinc finger protein 644 (Zinc finger motif enhancer-binding protein 2) (Zep-2)	43		5|7	12	6	2	0|0|0|0|0|0|0|0|0|0|0|0|0|0|0|0|0|0|0|0|0|0|0|0|0|0|2|3|0|0|1|3|0|0|0|0|0|0|0|0|1|0|0|0	0.98
ELF2	Q15723	ENSG00000109381	Ets	Q96KQ7	EHMT2	Histone-lysine N-methyltransferase EHMT2 (EC 2.1.1.-) (EC 2.1.1.43) (Euchromatic histone-lysine N-methyltransferase 2) (HLA-B-associated transcript 8) (Histone H3-K9 methyltransferase 3) (H3-K9-HMTase 3) (Lysine N-methyltransferase 1C) (Protein G9a)	38	CtBP complex, CtBP core complex, DNMT1-G9a-PCNA complex, DNMT1-G9a complex, E2F-6 complex	9|6	15	7.5	2	3|3|2|0|0|3|2|1|6|4|0|0|0|0|0|0|1|0|0|0|0|0|1|1|0|1|9|8|0|0|1|3|0|0|0|0|0|0|0|0|0|2|0|0	0.82
ELF2	Q15723	ENSG00000109381	Ets	Q9Y2X9	ZN281	Zinc finger protein 281 (GC-box-binding zinc finger protein 1) (Transcription factor ZBP-99) (Zinc finger DNA-binding protein 99)	37	UTX-MLL2/3 complex	9|8	17	8.5	2	8|5|3|3|4|5|4|3|6|3|0|0|0|0|0|0|1|0|0|1|1|0|0|0|0|0|8|6|0|0|4|7|0|0|0|0|1|0|0|0|3|1|0|0	0.77
ELF2	Q15723	ENSG00000109381	Ets	P13056	NR2C1	Nuclear receptor subfamily 2 group C member 1 (Orphan nuclear receptor TR2) (Testicular receptor 2)	36		8|10	18	9	2	2|2|0|0|0|0|1|0|0|1|0|0|0|0|0|0|0|0|0|0|0|0|0|0|0|1|0|1|0|0|1|0|0|0|0|0|0|0|0|0|0|0|1|0	1
ELF2	Q15723	ENSG00000109381	Ets	Q8IWI9	MGAP	MAX gene-associated protein (MAX dimerization protein 5)	35	E2F-6 complex	20|21	41	20.5	2	2|1|4|0|4|0|2|0|2|0|1|2|2|1|1|0|1|0|1|1|0|0|0|0|0|0|11|10|0|1|8|11|0|0|0|2|0|3|0|0|4|8|0|0	0.98
ELF2	Q15723	ENSG00000109381	Ets	P54253	ATX1	Ataxin-1 (Spinocerebellar ataxia type 1 protein)	34		3|2	5	2.5	2	1|1|1|0|0|0|0|0|0|0|0|0|0|0|0|0|0|0|0|0|0|0|0|0|0|0|0|1|0|0|0|0|0|0|0|0|0|0|0|0|0|1|0|0	0.96
ELF2	Q15723	ENSG00000109381	Ets	Q9H9B1	EHMT1	Histone-lysine N-methyltransferase EHMT1 (EC 2.1.1.-) (EC 2.1.1.43) (Euchromatic histone-lysine N-methyltransferase 1) (Eu-HMTase1) (G9a-like protein 1) (GLP) (GLP1) (Histone H3-K9 methyltransferase 5) (H3-K9-HMTase 5) (Lysine N-methyltransferase 1D)	34	CtBP complex, CtBP core complex, E2F-6 complex	8|9	17	8.5	2	7|6|1|0|4|0|9|1|8|4|0|0|0|0|0|0|0|0|0|0|0|0|0|0|1|0|6|9|1|0|5|10|0|0|0|0|1|0|0|0|0|2|0|0	0.76
ELF2	Q15723	ENSG00000109381	Ets	Q5PSV4	BRM1L	Breast cancer metastasis-suppressor 1-like protein (BRMS1-homolog protein p40) (BRMS1-like protein p40)	29	ING2 complex	12|14	26	13	2	2|5|2|1|2|5|1|0|1|1|0|0|0|0|0|0|1|0|0|0|0|0|0|0|0|0|2|4|0|0|0|0|0|0|1|1|1|1|0|0|3|5|2|2	1
ELF2	Q15723	ENSG00000109381	Ets	Q7Z3K3	POGZ	Pogo transposable element with ZNF domain (Suppressor of hairy wing homolog 5) (Zinc finger protein 280E) (Zinc finger protein 635)	29		6|3	9	4.5	2	1|1|2|0|2|0|0|0|1|2|1|1|1|1|0|0|0|0|0|0|0|0|0|0|0|0|2|4|1|0|0|1|0|0|0|0|0|0|0|0|2|2|0|0	0.82
ELF2	Q15723	ENSG00000109381	Ets	Q96L91	EP400	E1A-binding protein p400 (EC 3.6.4.-) (CAG repeat protein 32) (Domino homolog) (hDomino) (Trinucleotide repeat-containing gene 12 protein) (p400 kDa SWI2/SNF2-related protein)	28	NuA4/Tip60 HAT complex, NuA4/Tip60 HAT complex, NuA4/Tip60-HAT complex A, DMAP1-associated complex, p400-associated complex, NuA4/Tip60 HAT complex, NuA4/Tip60 HAT complex	16|20	36	18	2	1|5|7|5|7|4|4|1|2|3|4|2|1|1|2|2|2|0|2|2|2|2|1|2|0|0|7|15|1|0|1|9|0|0|1|1|0|1|0|0|13|10|3|1	0.93
ELF2	Q15723	ENSG00000109381	Ets	O75461	E2F6	Transcription factor E2F6 (E2F-6)	26	E2F-6 complex, MLL1-WDR5 complex	5|4	9	4.5	2	0|1|0|1|0|0|1|0|1|1|0|0|0|0|0|0|0|0|0|0|0|0|0|0|0|0|2|1|0|0|0|2|0|0|0|0|0|0|0|0|0|1|0|0	1
ELF2	Q15723	ENSG00000109381	Ets	Q969R5	LMBL2	Lethal(3)malignant brain tumor-like protein 2 (H-l(3)mbt-like protein 2) (L(3)mbt-like protein 2)	25	E2F-6 complex	5|4	9	4.5	2	0|0|0|0|0|0|0|0|0|0|0|0|0|0|0|0|0|0|0|0|0|0|0|0|0|0|1|2|0|0|0|0|0|0|0|0|0|0|0|0|0|0|0|0	1
ELF2	Q15723	ENSG00000109381	Ets	Q9UQR1	ZN148	Zinc finger protein 148 (Transcription factor ZBP-89) (Zinc finger DNA-binding protein 89)	25		7|6	13	6.5	2	0|2|1|0|0|0|1|1|1|1|0|0|0|0|1|0|0|0|0|0|0|0|0|0|0|0|2|1|0|0|1|4|0|0|0|0|0|0|0|0|0|1|0|0	0.99
ELF2	Q15723	ENSG00000109381	Ets	P85037	FOXK1	Forkhead box protein K1 (Myocyte nuclear factor) (MNF)	24		6|8	14	7	2	1|1|0|0|0|0|0|0|1|0|0|0|0|0|0|0|0|0|0|0|0|0|0|0|0|0|1|0|0|0|0|0|0|0|0|0|0|0|0|0|0|0|0|0	1
ELF2	Q15723	ENSG00000109381	Ets	P49116	NR2C2	Nuclear receptor subfamily 2 group C member 2 (Orphan nuclear receptor TAK1) (Orphan nuclear receptor TR4) (Testicular receptor 4)	24		3|3	6	3	2	0|0|0|0|0|0|0|0|0|0|0|0|0|1|0|0|0|0|0|0|0|0|0|0|0|0|1|1|0|0|0|0|0|0|0|0|0|0|0|0|0|0|0|0	0.99
ELF2	Q15723	ENSG00000109381	Ets	Q9H0E3	SP130	Histone deacetylase complex subunit SAP130 (130 kDa Sin3-associated polypeptide) (Sin3-associated polypeptide p130)	24	SAP complex (Sin3-associated protein complex), SAP complex (Sin3-associated protein complex), SIN3-SAP25 complex, SIN3-SAP25 complex, ING2 complex, Emerin complex 24, Emerin complex 25, STAGA complex, SPT3-linked	11|15	26	13	2	4|3|7|2|7|3|3|1|3|3|2|1|2|1|1|1|2|0|0|1|2|3|1|3|0|0|5|4|2|3|5|3|0|1|0|0|1|1|0|0|4|3|1|3	0.99
ELF2	Q15723	ENSG00000109381	Ets	Q15906	VPS72	Vacuolar protein sorting-associated protein 72 homolog (Protein YL-1) (Transcription factor-like 1)	23	SRCAP-associated chromatin remodeling complex, NuA4/Tip60 HAT complex, DMAP1-associated complex	3|3	6	3	2	2|1|0|0|2|0|0|0|1|0|0|0|0|0|0|0|0|0|0|0|0|0|0|0|0|0|1|2|0|0|0|2|0|0|0|0|0|0|0|0|1|2|0|0	0.86
ELF2	Q15723	ENSG00000109381	Ets	Q9Y6X8	ZHX2	Zinc fingers and homeoboxes protein 2 (Alpha-fetoprotein regulator 1) (AFP regulator 1) (Regulator of AFP) (Zinc finger and homeodomain protein 2)	23		4|3	7	3.5	2	2|3|0|0|0|0|3|0|3|3|0|0|0|0|0|0|0|0|0|0|0|0|0|0|0|0|1|1|0|0|1|1|0|0|0|0|0|0|0|0|0|0|0|0	0.8
ELF2	Q15723	ENSG00000109381	Ets	Q92560	BAP1	Ubiquitin carboxyl-terminal hydrolase BAP1 (EC 3.4.19.12) (BRCA1-associated protein 1) (Cerebral protein 6)	22		15|15	30	15	2	1|1|1|2|0|0|1|0|1|0|0|0|0|0|0|1|0|0|0|0|0|0|0|0|0|0|2|3|0|0|0|0|0|0|0|0|0|0|0|0|1|1|0|0	1	X		X	X	X	X
ELF2	Q15723	ENSG00000109381	Ets	Q6MZP7	LIN54	Protein lin-54 homolog (CXC domain-containing protein 1)	22	LINC complex, S-phase, LINC core complex, LINC complex, quiescent cells	12|12	24	12	2	8|7|4|1|2|2|4|1|9|4|0|1|0|0|0|0|1|0|0|0|0|0|0|0|0|0|11|5|1|1|9|9|1|0|2|2|1|0|0|0|7|4|0|2	0.84
ELF2	Q15723	ENSG00000109381	Ets	Q96QT6	PHF12	PHD finger protein 12 (PHD factor 1) (Pf1)	22		26|24	50	25	2	1|0|2|0|3|1|2|0|1|0|1|3|2|0|3|1|1|0|1|1|1|1|0|0|0|0|0|5|0|0|0|3|0|0|0|0|0|0|0|0|2|3|0|0	1
ELF2	Q15723	ENSG00000109381	Ets	Q7Z589	EMSY	BRCA2-interacting transcriptional repressor EMSY	21	NIF-1-DBC1-EMSY complex	26|20	46	23	2	3|3|6|2|4|3|4|2|3|3|0|0|0|0|4|0|3|0|2|1|2|1|1|1|0|0|10|14|0|1|2|6|1|0|1|1|0|1|0|0|6|5|2|1	0.99
ELF2	Q15723	ENSG00000109381	Ets	Q8WUU5	GATD1	GATA zinc finger domain-containing protein 1 (Ocular development-associated gene protein)	21		9|10	19	9.5	2	1|3|1|2|0|1|1|1|1|1|0|0|0|0|0|0|0|0|0|0|0|0|0|0|0|0|0|0|0|0|0|2|0|0|0|1|0|0|0|0|1|2|0|1	1
ELF2	Q15723	ENSG00000109381	Ets	Q9NP50	SHCAF	SIN3-HDAC complex-associated factor (Protein FAM60A) (Tera protein homolog)	21		8|9	17	8.5	2	3|1|1|1|1|1|3|1|3|1|1|0|0|0|0|1|1|0|0|1|1|0|0|0|0|0|0|2|0|0|0|2|0|0|1|0|0|0|0|0|2|2|0|0	1
ELF2	Q15723	ENSG00000109381	Ets	P25490	TYY1	Transcriptional repressor protein YY1 (Delta transcription factor) (INO80 complex subunit S) (NF-E1) (Yin and yang 1) (YY-1)	21	Polycomb repressive complex 1 (PRC1, hPRC-H), Ku antigen-YY1-alphaMyHC promoter complex, YY1-Notch1-RBP-Jkappa complex, YY1-Notch1 complex, hs4 enhancer complex (faster migrating complex), hs4 enhancer complex (slow migrating complex), YY1-MDM2-p53 complex, EED-EZH-YY1 polycomb complex	3|3	6	3	2	1|2|0|0|2|0|1|0|0|0|0|0|0|0|0|0|0|0|0|0|0|0|0|0|0|1|0|0|0|0|2|1|0|0|0|0|0|0|0|0|0|0|0|0	0.92
ELF2	Q15723	ENSG00000109381	Ets	Q15291	RBBP5	Retinoblastoma-binding protein 5 (RBBP-5) (Retinoblastoma-binding protein RBQ-3)	20	Menin-associated histone methyltransferase complex, MLL-HCF complex, ALL-1 supercomplex, WDR5-ASH2L-RBBP5-MLL2 complex, ASCOM complex, MOF complex, Set1B complex, Set1A complex, UTX-MLL2/3 complex, PTIP-HMT complex, MLL1-WDR5 complex, PITX2-MLL4-ASH2L-RBBP5-PTIP complex, MLL1 core complex, MLL2 complex, MLL3 complex, MLL1 complex, MLL4 complex, Set1A complex, Set1B complex, CUL4A-DDB1-RBBP5 compl…	13|18	31	15.5	2	6|6|6|4|9|6|5|3|4|4|2|0|0|0|1|1|4|0|0|0|1|0|0|0|0|1|2|3|0|0|4|3|0|0|0|1|0|0|0|0|2|0|0|2	0.97
ELF2	Q15723	ENSG00000109381	Ets	P14859	PO2F1	POU domain, class 2, transcription factor 1 (NF-A1) (Octamer-binding protein 1) (Oct-1) (Octamer-binding transcription factor 1) (OTF-1)	18	OCT1-SOX2 DNA-protein complex, hs4 enhancer complex (faster migrating complex), OCT1-OBF1-DNA-TLE1 complex, OCT1-OBF1-DNA complex, OCT1-OBF1-DNA complex	2|2	4	2	2	0|0|0|0|0|0|0|0|0|0|0|0|0|0|0|0|0|0|0|0|0|0|0|0|0|0|0|0|0|0|0|0|0|0|0|0|0|0|0|0|0|0|0|0	0.94
ELF2	Q15723	ENSG00000109381	Ets	P49848	TAF6	Transcription initiation factor TFIID subunit 6 (RNA polymerase II TBP-associated factor subunit E) (Transcription initiation factor TFIID 70 kDa subunit) (TAF(II)70) (TAFII-70) (TAFII70) (Transcription initiation factor TFIID 80 kDa subunit) (TAF(II)80) (TAFII-80) (TAFII80)	18	TFIID complex, TFTC complex (TATA-binding protein-free TAF-II-containing complex), TFTC complex (TATA-binding protein-free TAF-II-containing complex), TFTC complex (TATA-binding protein-free TAF-II-containing complex), TFTC complex (TATA-binding protein-free TAF-II-containing complex), TFTC complex (TATA-binding protein-free TAF-II-containing complex), TFIID complex, TFIID-beta complex, TFTC comp…	18|16	34	17	2	5|5|8|3|8|4|5|1|7|3|2|1|1|1|0|0|2|0|1|0|0|1|0|0|0|1|3|3|3|3|8|9|0|1|2|1|0|0|0|0|5|3|3|2	0.98
ELF2	Q15723	ENSG00000109381	Ets	Q76L83	ASXL2	Putative Polycomb group protein ASXL2 (Additional sex combs-like protein 2)	17		3|2	5	2.5	2	2|1|0|1|0|0|0|0|1|1|0|0|0|0|0|0|0|0|0|0|0|0|0|0|0|0|0|0|0|0|0|0|0|0|0|0|0|0|0|0|1|0|0|0	0.93
ELF2	Q15723	ENSG00000109381	Ets	Q6P4R8	NFRKB	Nuclear factor related to kappa-B-binding protein (DNA-binding protein R kappa-B) (INO80 complex subunit G)	17	INO80 chromatin remodeling complex	8|7	15	7.5	2	0|0|0|0|0|0|0|0|0|0|0|0|0|0|0|0|0|0|0|0|0|0|0|0|0|0|0|3|0|0|0|0|0|0|0|0|0|0|0|0|0|0|0|0	1
ELF2	Q15723	ENSG00000109381	Ets	P37275	ZEB1	Zinc finger E-box-binding homeobox 1 (NIL-2-A zinc finger protein) (Negative regulator of IL2) (Transcription factor 8) (TCF-8)	17	CtBP complex, CtBP core complex	4|3	7	3.5	2	0|1|1|0|3|0|2|0|1|0|0|0|0|0|0|0|0|0|0|0|0|0|0|0|0|0|1|1|0|0|0|1|0|0|0|0|0|0|0|0|0|0|0|0	0.93
ELF2	Q15723	ENSG00000109381	Ets	Q9H2F5	EPC1	Enhancer of polycomb homolog 1	15	NuA4/Tip60 HAT complex, NuA4/Tip60 HAT complex, NuA4/Tip60-HAT complex B, NuA4/Tip60-HAT complex A, DMAP1-associated complex, NuA4/Tip60 HAT complex, NuA4/Tip60 HAT complex	2|3	5	2.5	2	0|0|1|0|1|0|0|0|0|0|0|0|0|0|0|0|0|0|1|1|0|0|0|1|0|0|0|0|0|0|0|0|0|0|0|0|0|0|0|0|1|4|0|0	0.81
ELF2	Q15723	ENSG00000109381	Ets	Q9UMN6	KMT2B	Histone-lysine N-methyltransferase 2B (Lysine N-methyltransferase 2B) (EC 2.1.1.43) (Myeloid/lymphoid or mixed-lineage leukemia protein 4) (Trithorax homolog 2) (WW domain-binding protein 7) (WBP-7)	15	Menin-associated histone methyltransferase complex, PTIP-HMT complex	39|38	77	38.5	2	9|11|1|1|4|4|7|2|6|6|0|0|0|0|0|0|0|0|0|0|0|0|0|0|0|1|5|6|0|0|3|7|0|0|0|0|0|0|0|0|0|0|0|0	1
ELF2	Q15723	ENSG00000109381	Ets	Q06546	GABPA	GA-binding protein alpha chain (GABP subunit alpha) (Nuclear respiratory factor 2 subunit alpha) (Transcription factor E4TF1-60)	14		8|9	17	8.5	2	2|1|1|2|1|0|2|0|1|0|0|0|0|0|2|0|0|0|0|0|0|0|0|0|0|0|0|0|1|0|0|5|0|0|0|0|0|0|0|0|2|1|0|0	0.99	X				X	X
ELF2	Q15723	ENSG00000109381	Ets	Q9UBL3	ASH2L	Set1/Ash2 histone methyltransferase complex subunit ASH2 (ASH2-like protein)	14	Menin-associated histone methyltransferase complex, MLL-HCF complex, WDR5-ASH2L-RBBP5-MLL2 complex, ASCOM complex, HCF-1 complex, Set1B complex, Set1A complex, UTX-MLL2/3 complex, PTIP-HMT complex, MLL1-WDR5 complex, PITX2-MLL4-ASH2L-RBBP5-PTIP complex, MLL1 core complex, MLL2 complex, MLL3 complex, MLL1 complex, MLL4 complex, Set1A complex, Set1B complex, NIF1-ASH2L-RBBP5-WDR5 complex, WRAD comp…	18|17	35	17.5	2	11|12|14|5|10|5|13|4|13|8|6|3|4|2|6|0|8|0|2|3|4|3|0|0|0|2|3|3|2|0|5|6|0|2|1|1|2|4|0|0|9|9|3|3	0.82
ELF2	Q15723	ENSG00000109381	Ets	Q15723	ELF2	ETS-related transcription factor Elf-2 (E74-like factor 2) (New ETS-related factor)	14		49|50	99	49.5	2	7|5|0|0|0|0|6|1|6|2|0|0|0|0|0|1|0|0|0|0|0|0|0|0|1|1|10|6|2|3|8|9|0|0|0|0|2|2|0|0|1|1|1|0	1
ELF2	Q15723	ENSG00000109381	Ets	P10244	MYBB	Myb-related protein B (B-Myb) (Myb-like protein 2)	14	LIN9-BMYB complex, LINC complex, S-phase	4|8	12	6	2	3|2|0|0|0|0|1|1|1|2|0|0|0|0|0|0|0|0|0|0|0|0|0|0|0|0|0|0|0|0|0|0|0|0|0|0|0|0|0|0|0|0|0|0	0.98
ELF2	Q15723	ENSG00000109381	Ets	Q14683	SMC1A	Structural maintenance of chromosomes protein 1A (SMC protein 1A) (SMC-1-alpha) (SMC-1A) (Sb1.8)	14	Cohesin-SA1 complex, Cohesin-SA2 complex, Cohesin-SA2 complex, Cohesin-SA1 complex, Cohesin-SA1 complex, Cohesin-SA2 complex, SNF2h-cohesin-NuRD complex, Sororin-cohesin complex, MDC1-p53BP1-SMC1 complex, SMC1-SMC3 complex, Sororin-cohesin complex, DDX11-RAD21-SMC1A-SMC3 complex	10|11	21	10.5	2	4|2|8|3|8|1|3|2|4|2|1|2|2|0|0|0|0|0|0|0|0|0|0|0|0|0|10|13|0|0|3|8|0|0|0|2|0|1|0|0|7|5|3|5	0.78
ELF2	Q15723	ENSG00000109381	Ets	Q12830	BPTF	Nucleosome-remodeling factor subunit BPTF (Bromodomain and PHD finger-containing transcription factor) (Fetal Alz-50 clone 1 protein) (Fetal Alzheimer antigen)	13	hNURF complex, hNURF complex	16|15	31	15.5	2	8|7|3|1|1|1|2|2|4|3|2|0|0|0|2|1|2|0|0|0|1|0|1|1|0|0|6|3|0|0|3|2|0|0|0|0|0|0|0|0|1|1|0|1	0.99
ELF2	Q15723	ENSG00000109381	Ets	Q9UK53	ING1	Inhibitor of growth protein 1	13	SIN3-ING1b complex I, SIN3-ING1b complex II, p33ING1b-PCNA complex, p33ING1b-p300 complex, p33ING1b-HDAC1 complex, ING1-p300-PCNA complex, ING1-PCNA complex	3|4	7	3.5	2	0|1|0|1|2|1|0|0|0|0|0|0|0|0|0|0|0|0|0|0|0|0|0|1|0|0|1|1|0|0|0|0|0|0|0|1|0|0|0|0|1|0|0|0	0.96
ELF2	Q15723	ENSG00000109381	Ets	Q96JM7	LMBL3	Lethal(3)malignant brain tumor-like protein 3 (H-l(3)mbt-like protein 3) (L(3)mbt-like protein 3) (MBT-1)	13		4|3	7	3.5	2	0|3|1|0|1|0|0|0|0|0|0|0|1|0|0|0|0|0|0|0|0|0|0|0|0|0|0|1|0|0|1|2|0|0|0|0|0|0|0|0|1|0|0|0	0.93
ELF2	Q15723	ENSG00000109381	Ets	Q71UM5	RS27L	40S ribosomal protein S27-like (Small ribosomal subunit protein eS27-like)	13		2|2	4	2	2	0|0|3|0|0|0|0|0|0|0|0|0|0|0|0|0|0|0|0|0|0|0|0|0|0|0|0|0|0|0|0|0|0|0|0|0|0|0|0|0|0|0|2|2	0.86
ELF2	Q15723	ENSG00000109381	Ets	O15047	SET1A	Histone-lysine N-methyltransferase SETD1A (EC 2.1.1.43) (Lysine N-methyltransferase 2F) (SET domain-containing protein 1A) (hSET1A) (Set1/Ash2 histone methyltransferase complex subunit SET1)	13	MOF complex, HCF-1 complex, Set1A complex, Set1A complex	36|31	67	33.5	2	11|11|9|4|7|5|4|3|7|3|2|1|1|1|0|0|0|0|0|1|1|1|0|0|1|0|7|3|2|0|7|5|0|0|0|1|0|1|0|0|4|4|1|0	1
ELF2	Q15723	ENSG00000109381	Ets	P52739	ZN131	Zinc finger protein 131	12		21|16	37	18.5	2	4|4|11|2|9|3|4|2|5|2|2|2|2|2|1|2|1|0|0|0|0|0|1|0|1|1|0|3|2|0|6|6|0|0|1|0|0|0|0|0|3|0|0|0	0.99	X				X	X
ELF2	Q15723	ENSG00000109381	Ets	Q5TKA1	LIN9	Protein lin-9 homolog (HuLin-9) (hLin-9) (Beta subunit-associated regulator of apoptosis) (TUDOR gene similar protein) (Type I interferon receptor beta chain-associated protein) (pRB-associated protein)	12	LIN9-BMYB complex, LINC complex, S-phase, LINC core complex, LINC complex, quiescent cells	4|2	6	3	2	2|1|1|1|1|0|2|1|1|1|0|0|0|0|0|0|1|0|0|0|0|0|0|0|0|0|1|3|0|0|0|0|0|0|0|0|0|0|0|0|0|0|0|0	0.77
ELF2	Q15723	ENSG00000109381	Ets	Q5VWG9	TAF3	Transcription initiation factor TFIID subunit 3 (140 kDa TATA box-binding protein-associated factor) (TBP-associated factor 3) (Transcription initiation factor TFIID 140 kDa subunit) (TAF(II)140) (TAF140) (TAFII-140) (TAFII140)	12	DA complex, DAB complex	7|6	13	6.5	2	1|1|0|1|1|0|0|0|0|0|0|0|0|0|0|0|0|0|0|1|0|0|0|0|0|0|2|3|0|0|1|1|0|0|0|0|0|0|0|0|1|1|0|0	1
ELF2	Q15723	ENSG00000109381	Ets	Q15542	TAF5	Transcription initiation factor TFIID subunit 5 (Transcription initiation factor TFIID 100 kDa subunit) (TAF(II)100) (TAFII-100) (TAFII100)	12	TFIID complex, TFTC complex (TATA-binding protein-free TAF-II-containing complex), TFTC complex (TATA-binding protein-free TAF-II-containing complex), TFTC complex (TATA-binding protein-free TAF-II-containing complex), TFTC complex (TATA-binding protein-free TAF-II-containing complex), TFTC complex (TATA-binding protein-free TAF-II-containing complex), TFIID complex, TFIID-beta complex, TFTC comp…	9|8	17	8.5	2	6|7|10|6|8|4|4|2|5|2|1|0|1|0|0|0|0|0|0|0|0|0|0|0|0|0|1|4|0|0|5|4|0|0|0|1|0|1|0|0|2|3|0|1	0.76
ELF2	Q15723	ENSG00000109381	Ets	Q9Y4A5	TRRAP	Transformation/transcription domain-associated protein (350/400 kDa PCAF-associated factor) (PAF350/400) (STAF40) (Tra1 homolog)	12	GCN5-TRRAP histone acetyltransferase complex, TFTC-type histone acetyl transferase complex, TFTC complex (TATA-binding protein-free TAF-II-containing complex), TFTC complex (TATA-binding protein-free TAF-II-containing complex), TFTC complex (TATA-binding protein-free TAF-II-containing complex), TFTC complex (TATA-binding protein-free TAF-II-containing complex), TFTC complex (TATA-binding protein-…	3|7	10	5	2	0|0|2|1|2|0|2|0|0|0|0|0|0|0|0|0|0|0|0|0|0|0|0|0|0|0|0|0|0|0|0|1|1|0|0|0|0|0|0|0|0|0|0|0	0.96
ELF2	Q15723	ENSG00000109381	Ets	Q9P2N6	KANL3	KAT8 regulatory NSL complex subunit 3 (NSL complex protein NSL3) (Non-specific lethal 3 homolog) (Serum inhibited-related protein) (Testis development protein PRTD)	11		14|12	26	13	2	0|1|0|1|1|2|1|1|1|0|0|0|0|0|0|0|0|0|0|0|0|0|0|0|0|0|1|1|0|1|0|2|0|0|0|0|0|0|0|0|0|1|0|0	1
ELF2	Q15723	ENSG00000109381	Ets	Q03164	KMT2A	Histone-lysine N-methyltransferase 2A (Lysine N-methyltransferase 2A) (EC 2.1.1.43) (ALL-1) (CXXC-type zinc finger protein 7) (Myeloid/lymphoid or mixed-lineage leukemia) (Myeloid/lymphoid or mixed-lineage leukemia protein 1) (Trithorax-like protein) (Zinc finger protein HRX) [Cleaved into: MLL cleavage product N320 (N-terminal cleavage product of 320 kDa) (p320); MLL cleavage product C180 (C-ter…	11	MLL-HCF complex, ALL-1 supercomplex, MOF complex, MLL1-WDR5 complex, MLL1 core complex, MLL1 complex, MWRAD complex (MLL1, WDR5, RBBP5, ASH2L, DPY30)	16|15	31	15.5	2	2|1|1|1|2|1|0|1|1|2|1|1|0|1|1|0|1|0|1|0|0|0|0|0|0|0|1|8|1|0|2|7|0|0|1|0|0|1|0|0|1|0|0|0	1
ELF2	Q15723	ENSG00000109381	Ets	Q9H7L9	SDS3	Sin3 histone deacetylase corepressor complex component SDS3 (45 kDa Sin3-associated polypeptide) (Suppressor of defective silencing 3 protein homolog)	11	SAP complex (Sin3-associated protein complex), SIN3-SAP25 complex, SIN3-SAP25 complex, HCF-1 complex, ING2 complex	9|8	17	8.5	2	4|3|4|1|2|1|3|1|3|2|0|0|0|0|0|0|0|0|0|0|0|0|0|0|0|0|4|4|0|0|0|2|0|0|0|1|0|1|0|0|1|3|2|1	0.97
ELF2	Q15723	ENSG00000109381	Ets	O60264	SMCA5	SWI/SNF-related matrix-associated actin-dependent regulator of chromatin subfamily A member 5 (SWI/SNF-related matrix-associated actin-dependent regulator of chromatin A5) (EC 3.6.4.-) (Sucrose nonfermenting protein 2 homolog) (hSNF2H)	11	DNMT3B complex, SNF2H-BAZ1A complex, Polycomb repressive complex 1 (PRC1, hPRC-H), Polycomb repressive complex 1 (PRC1, hPRC-H), HuCHRAC complex, WICH complex, SNF2h-cohesin-NuRD complex, Remodeling and spacing factor (RSF) complex, SNF2H-BAZ1A complex, CEN complex, ALL-1 supercomplex, SNF2h-HDAC12 complex, Nucleolar remodeling complex (NoRC complex), B-WICH complex, B-WICH complex	11|14	25	12.5	2	10|6|4|5|8|4|1|3|2|2|0|1|0|0|1|0|3|0|0|0|0|0|0|0|0|2|4|6|0|0|2|2|0|0|0|0|0|0|0|0|4|4|0|3	0.93
ELF2	Q15723	ENSG00000109381	Ets	Q9P0U4	CXXC1	CXXC-type zinc finger protein 1 (CpG-binding protein) (PHD finger and CXXC domain-containing protein 1)	10	Set1B complex, Set1A complex, Set1A complex, Set1B complex	12|13	25	12.5	2	5|3|3|1|7|1|4|0|5|0|1|0|0|1|0|0|0|0|0|0|0|0|0|0|0|0|0|0|0|0|4|2|0|0|0|0|0|0|0|0|1|0|0|0	0.98
ELF2	Q15723	ENSG00000109381	Ets	Q9H160	ING2	Inhibitor of growth protein 2 (Inhibitor of growth 1-like protein) (ING1Lp) (p32) (p33ING2)	10	ING2 complex	3|4	7	3.5	2	0|0|0|0|0|0|0|0|0|0|0|0|0|0|0|0|0|0|0|0|0|0|0|0|0|0|1|1|0|0|0|0|0|0|0|0|0|0|0|0|0|0|0|0	0.99
ELF2	Q15723	ENSG00000109381	Ets	Q16514	TAF12	Transcription initiation factor TFIID subunit 12 (Transcription initiation factor TFIID 20/15 kDa subunits) (TAFII-20/TAFII-15) (TAFII20/TAFII15)	10	TFTC complex (TATA-binding protein-free TAF-II-containing complex), TFTC complex (TATA-binding protein-free TAF-II-containing complex), TFTC complex (TATA-binding protein-free TAF-II-containing complex), TFTC complex (TATA-binding protein-free TAF-II-containing complex), TFTC complex (TATA-binding protein-free TAF-II-containing complex), TFIID complex, TFIID-beta complex, TFTC complex (TATA-bindi…	4|3	7	3.5	2	0|0|2|0|1|0|0|0|0|0|0|0|0|0|0|0|0|0|0|0|0|0|0|0|0|0|3|2|0|0|0|0|0|0|0|0|0|0|0|0|1|1|1|0	0.92
ELF2	Q15723	ENSG00000109381	Ets	Q9H0E9	BRD8	Bromodomain-containing protein 8 (Skeletal muscle abundant protein) (Skeletal muscle abundant protein 2) (Thyroid hormone receptor coactivating protein of 120 kDa) (TrCP120) (p120)	9	NuA4/Tip60 HAT complex, NuA4/Tip60 HAT complex, NuA4/Tip60-HAT complex A, DMAP1-associated complex, NuA4/Tip60 HAT complex, NuA4/Tip60 HAT complex	8|7	15	7.5	2	2|4|1|2|4|3|2|1|3|2|2|0|0|0|1|1|1|0|0|0|0|0|0|0|0|0|4|5|1|0|2|4|0|0|0|0|0|1|0|0|2|3|2|0	0.92
ELF2	Q15723	ENSG00000109381	Ets	Q05BQ5	MBTD1	MBT domain-containing protein 1	9		2|3	5	2.5	2	0|0|0|0|0|0|0|0|0|0|0|0|0|0|0|0|0|0|0|0|0|0|0|0|0|0|0|0|0|0|0|0|0|0|0|0|0|0|0|0|1|1|0|0	0.97
ELF2	Q15723	ENSG00000109381	Ets	Q6ZRS2	SRCAP	Helicase SRCAP (EC 3.6.4.-) (Domino homolog 2) (Snf2-related CBP activator)	9	SRCAP-associated chromatin remodeling complex, DMAP1-associated complex, NCOR1 complex	13|12	25	12.5	2	9|9|4|5|10|7|9|6|7|4|0|0|0|0|1|0|3|0|0|0|0|0|1|1|1|0|6|10|1|0|1|5|0|1|1|3|0|1|0|0|3|5|0|0	0.83
ELF2	Q15723	ENSG00000109381	Ets	Q9UKD1	GMEB2	Glucocorticoid modulatory element-binding protein 2 (GMEB-2) (DNA-binding protein p79PIF) (Parvovirus initiation factor p79) (PIF p79)	8		6|7	13	6.5	2	2|4|0|0|1|0|0|1|1|1|0|0|0|0|0|0|0|0|0|0|0|0|0|0|0|0|1|1|0|0|0|1|0|0|0|0|0|0|0|0|0|0|0|0	0.99
ELF2	Q15723	ENSG00000109381	Ets	Q9ULG1	INO80	DNA helicase INO80 (hINO80) (EC 3.6.4.12) (INO80 complex subunit A) (Putative DNA helicase INO80 complex homolog 1)	8	INO80 chromatin remodeling complex	2|2	4	2	2	0|0|0|0|0|0|0|0|0|0|0|0|0|0|0|0|0|0|0|0|0|1|0|0|0|0|0|0|0|0|0|0|0|0|0|0|0|0|0|0|1|2|0|0	0.94
ELF2	Q15723	ENSG00000109381	Ets	Q9H9L4	KANL2	KAT8 regulatory NSL complex subunit 2 (NSL complex protein NSL2) (Non-specific lethal 2 homolog)	8		7|5	12	6	2	0|1|0|1|1|0|0|0|0|0|0|1|0|0|0|0|0|0|0|0|0|0|0|0|0|0|0|1|0|0|0|0|0|0|0|0|0|0|0|0|1|0|0|0	1
ELF2	Q15723	ENSG00000109381	Ets	Q96EZ8	MCRS1	Microspherule protein 1 (58 kDa microspherule protein) (Cell cycle-regulated factor p78) (INO80 complex subunit J) (MCRS2)	8	INO80 chromatin remodeling complex, DIPA-MCRS1 complex, MLL1-WDR5 complex, MSP58-RINT1 complex	8|7	15	7.5	2	0|1|0|0|0|0|2|0|2|1|0|0|0|0|0|0|0|0|0|0|0|0|0|0|0|0|2|0|0|0|0|0|0|0|0|0|0|0|0|0|0|0|0|0	1
ELF2	Q15723	ENSG00000109381	Ets	P32519	ELF1	ETS-related transcription factor Elf-1 (E74-like factor 1)	7		3|4	7	3.5	2	0|0|0|0|0|0|0|0|0|0|0|0|0|0|0|0|0|0|0|0|0|0|0|0|0|0|1|0|0|0|0|0|0|0|0|0|0|0|0|0|0|0|0|0	0.99	X				X
ELF2	Q15723	ENSG00000109381	Ets	Q9GZN1	ARP6	Actin-related protein 6 (hArp6) (hARPX)	7	SRCAP-associated chromatin remodeling complex	2|2	4	2	2	1|2|0|0|1|1|1|1|1|1|0|0|0|0|0|0|0|0|0|0|0|0|0|0|0|0|0|0|0|0|0|0|0|0|0|0|0|0|0|0|0|0|0|0	0.81
ELF2	Q15723	ENSG00000109381	Ets	Q7Z3B3	KANL1	KAT8 regulatory NSL complex subunit 1 (MLL1/MLL complex subunit KANSL1) (MSL1 homolog 1) (hMSL1v1) (NSL complex protein NSL1) (Non-specific lethal 1 homolog)	7	MSL complex, MLL1-WDR5 complex	8|12	20	10	2	1|2|1|1|1|0|1|0|0|0|0|0|0|0|0|0|0|0|0|0|0|0|0|0|0|0|1|2|0|0|0|0|0|0|0|0|0|0|0|0|0|0|0|0	1
ELF2	Q15723	ENSG00000109381	Ets	Q6P1X5	TAF2	Transcription initiation factor TFIID subunit 2 (150 kDa cofactor of initiator function) (RNA polymerase II TBP-associated factor subunit B) (TBP-associated factor 150 kDa) (Transcription initiation factor TFIID 150 kDa subunit) (TAF(II)150) (TAFII-150) (TAFII150)	7	TFIID complex, TFTC complex (TATA-binding protein-free TAF-II-containing complex), TFTC complex (TATA-binding protein-free TAF-II-containing complex), TFTC complex (TATA-binding protein-free TAF-II-containing complex), TFTC complex (TATA-binding protein-free TAF-II-containing complex), TFTC complex (TATA-binding protein-free TAF-II-containing complex), TFIID-beta complex, TFTC complex (TATA-bindi…	4|5	9	4.5	2	0|0|1|2|1|1|1|0|0|0|0|0|0|0|0|0|0|0|0|0|0|0|0|0|0|0|0|0|0|0|0|0|0|0|0|0|0|0|0|0|0|0|0|0	1
ELF2	Q15723	ENSG00000109381	Ets	Q9H7Z6	KAT8	Histone acetyltransferase KAT8 (EC 2.3.1.48) (Lysine acetyltransferase 8) (MOZ, YBF2/SAS3, SAS2 and TIP60 protein 1) (MYST-1) (hMOF)	6	MSL complex, MAF2 complex, MOF complex, MLL1-WDR5 complex	6|7	13	6.5	2	1|1|0|0|0|0|2|0|0|0|0|0|0|0|0|0|0|0|0|0|0|0|0|0|0|0|1|1|0|0|0|0|0|0|0|0|0|0|0|0|0|0|0|0	1
ELF2	Q15723	ENSG00000109381	Ets	Q9HCU9	BRMS1	Breast cancer metastasis-suppressor 1	5	BRMS1-SIN3-HDAC complex, BRMS1-RBP1 complex, ING2 complex	6|6	12	6	2	0|0|0|0|0|0|0|0|0|0|0|0|0|0|0|0|0|0|0|0|0|0|0|0|0|0|0|0|0|0|0|0|0|0|0|0|0|0|0|0|0|0|0|0	1
ELF2	Q15723	ENSG00000109381	Ets	Q9UBU8	MO4L1	Mortality factor 4-like protein 1 (MORF-related gene 15 protein) (Protein MSL3-1) (Transcription factor-like protein MRG15)	5	NuA4/Tip60 HAT complex, NuA4/Tip60 HAT complex, MRG15-PAM14-RB complex, MRG15-PAM14-RB complex, MAF2 complex, NuA4/Tip60-HAT complex B, NuA4/Tip60-HAT complex A, NuA4/Tip60 HAT complex, NuA4/Tip60 HAT complex	5|4	9	4.5	2	1|2|0|0|0|0|1|1|2|2|0|0|0|0|0|0|0|0|0|0|0|0|0|0|0|0|0|0|0|0|0|0|0|0|0|0|0|0|0|0|0|0|0|1	0.98
ELF2	Q15723	ENSG00000109381	Ets	P52747	ZN143	Zinc finger protein 143 (SPH-binding factor) (Selenocysteine tRNA gene transcription-activating factor) (hStaf)	5		4|4	8	4	2	1|0|2|0|1|0|1|0|0|0|2|1|2|3|0|0|0|0|1|0|0|1|0|1|0|0|0|0|0|0|0|0|0|0|0|0|0|0|0|0|0|0|0|0	0.94
ELF2	Q15723	ENSG00000109381	Ets	Q9UPP1	PHF8	Histone lysine demethylase PHF8 (EC 1.14.11.27) (PHD finger protein 8)	4		2|2	4	2	2	0|0|0|0|0|0|0|0|0|0|0|0|0|0|0|0|0|0|0|0|0|0|0|0|0|0|0|0|0|0|0|0|0|0|0|0|0|0|0|0|0|0|0|0	0.94
ELF2	Q15723	ENSG00000109381	Ets	Q8IXJ9	ASXL1	Putative Polycomb group protein ASXL1 (Additional sex combs-like protein 1)	3		4|3	7	3.5	2	0|1|0|0|0|0|0|0|1|0|0|0|0|0|0|0|0|0|0|0|0|0|0|0|0|0|0|0|0|0|0|0|0|0|0|0|0|0|0|0|0|0|0|0	0.99
ELF2	Q15723	ENSG00000109381	Ets	Q9Y5Z7	HCFC2	Host cell factor 2 (HCF-2) (C2 factor)	3	MLL2 complex, Set1A complex, Set1B complex	4|2	6	3	2	0|0|0|0|0|0|0|0|0|0|0|0|0|0|0|0|0|0|0|0|0|0|0|0|0|0|0|0|0|0|0|0|0|0|0|0|0|0|0|0|0|0|0|0	0.97
ELF2	Q15723	ENSG00000109381	Ets	O75182	SIN3B	Paired amphipathic helix protein Sin3b (Histone deacetylase complex subunit Sin3b) (Transcriptional corepressor Sin3b)	3	BRMS1-SIN3-HDAC complex, NCOR-SIN3-RPD3 complex, HCF-1 complex, NCOR-SIN3-HDAC-HESX1 complex, SMAR1-HDAC1-SIN3A-SIN3B repressor complex, SMAR1-HDAC1-SIN3A-SIN3B-p107-p130 repressor complex	32|36	68	34	2	16|15|24|12|32|13|15|10|15|11|5|3|1|1|2|3|5|0|5|4|3|8|2|4|3|3|8|9|6|5|6|6|2|1|5|5|5|7|0|0|10|14|14|12	0.93
ELF2	Q15723	ENSG00000109381	Ets	P29374	ARI4A	AT-rich interactive domain-containing protein 4A (ARID domain-containing protein 4A) (Retinoblastoma-binding protein 1) (RBBP-1)	2	ING2 complex	7|8	15	7.5	2	0|0|0|0|0|0|0|0|0|0|0|0|0|0|0|0|0|0|0|0|0|0|0|0|0|0|0|0|0|0|0|0|0|0|0|0|0|0|0|0|0|0|0|0	1	X				X	X
ELF2	Q15723	ENSG00000109381	Ets	P29375	KDM5A	Lysine-specific demethylase 5A (EC 1.14.11.-) (Histone demethylase JARID1A) (Jumonji/ARID domain-containing protein 1A) (Retinoblastoma-binding protein 2) (RBBP-2)	2		8|5	13	6.5	2	0|0|2|1|1|1|0|0|0|0|0|0|0|0|0|0|0|0|0|0|0|0|0|0|0|0|0|0|0|0|0|0|0|0|0|0|0|0|0|0|0|0|0|0	1
ELF2	Q15723	ENSG00000109381	Ets	P20226	TBP	TATA-box-binding protein (TATA sequence-binding protein) (TATA-binding factor) (TATA-box factor) (Transcription initiation factor TFIID TBP subunit)	2	RNA polymerase II holoenzyme complex, TFIID complex, TFIID complex, TFIID-beta complex, TFIID complex, TFIID complex, B-cell specific, DA complex, DAB complex, TFIID complex, TFIID complex, TFIID-beta complex, HMG1-TBP-TATA complex, PU.1-TBP complex, 5S-DNA-TFIIIA-TFIIIC2-TFIIIB subcomplex, ALL-1 supercomplex, Transcription initiation factor complex (TAF1, TAF5, TAF11, TAF12, TBP), Transcription …	2|2	4	2	2	0|1|0|0|1|0|0|0|0|1|0|0|0|0|0|0|0|0|0|0|0|0|0|0|0|0|0|0|0|0|0|0|0|0|0|0|0|0|0|0|0|0|1|0	0.94
ELF2	Q15723	ENSG00000109381	Ets	Q9NUA8	ZBT40	Zinc finger and BTB domain-containing protein 40	2		3|3	6	3	2	0|0|0|0|0|0|0|0|0|0|0|0|0|0|0|0|0|0|0|0|0|0|0|0|0|0|0|0|0|0|0|0|0|0|0|0|0|0|0|0|0|0|0|0	0.99
ELF2	Q15723	ENSG00000109381	Ets	Q96JP5	ZFP91	E3 ubiquitin-protein ligase ZFP91 (EC 2.3.2.27) (RING-type E3 ubiquitin transferase ZFP91) (Zinc finger protein 757) (Zinc finger protein 91 homolog) (Zfp-91)	2	CEN complex	2|2	4	2	2	1|1|0|0|1|0|0|0|0|0|0|1|0|0|0|0|0|0|0|0|0|0|0|0|0|0|1|0|0|0|0|0|0|0|0|0|0|0|0|0|0|0|0|0	0.93
ELF2	Q15723	ENSG00000109381	Ets	Q8TCN5	ZN507	Zinc finger protein 507	2		10|7	17	8.5	2	0|0|0|0|0|0|0|0|0|0|0|0|0|0|0|0|0|0|0|0|0|0|0|0|0|0|0|0|0|0|0|0|0|0|0|0|0|0|0|0|0|0|0|0	1
ELF2	Q15723	ENSG00000109381	Ets	Q8N9N5	BANP	Protein BANP (BEN domain-containing protein 1) (Btg3-associated nuclear protein) (Scaffold/matrix-associated region-1-binding protein)	1	SMAR1-HDAC1-SIN3A-SIN3B repressor complex, SMAR1-HDAC1-SIN3A-SIN3B-p107-p130 repressor complex	4|3	7	3.5	2	0|0|0|0|0|0|0|0|0|0|0|0|0|0|0|0|0|0|0|0|0|0|0|0|0|0|0|0|0|0|0|0|0|0|0|0|0|0|0|0|0|0|0|0	0.99
ELF2	Q15723	ENSG00000109381	Ets	Q06413	MEF2C	Myocyte-specific enhancer factor 2C (Myocyte enhancer factor 2C)	1		2|2	4	2	2	0|0|0|0|1|0|0|0|0|0|0|1|1|0|0|0|0|0|0|0|0|0|0|0|0|0|0|0|0|0|0|0|0|0|0|0|0|0|0|0|0|0|0|0	0.94
ELF3	P78545	ENSG00000163435	Ets;_AT_hook	Q86U86	PB1	Protein polybromo-1 (hPB1) (BRG1-associated factor 180) (BAF180) (Polybromo-1D)	48	PBAF complex (Polybromo- and BAF containing complex), PBAF complex (Polybromo- and BAF containing complex), PBAF complex (Polybromo- and BAF containing complex), PBAF complex (Polybromo- and BAF containing complex), PBAF complex (Polybromo- and BAF containing complex)	18|17	35	17.5	2	6|2|12|8|14|10|2|3|4|2|1|1|0|0|2|0|5|0|0|0|0|0|0|1|1|0|2|3|0|0|1|6|0|0|0|4|0|2|0|0|14|24|8|4	0.86
ELF3	P78545	ENSG00000163435	Ets;_AT_hook	Q92782	DPF1	Zinc finger protein neuro-d4 (BRG1-associated factor 45B) (BAF45B) (D4, zinc and double PHD fingers family 1)	45		2|2	4	2	2	0|0|2|0|0|0|0|0|0|0|0|0|0|0|0|0|0|0|0|0|0|0|0|0|0|0|0|0|0|0|0|1|0|0|0|0|0|0|0|0|0|0|0|0	0.95
ELF3	P78545	ENSG00000163435	Ets;_AT_hook	Q09472	EP300	Histone acetyltransferase p300 (p300 HAT) (EC 2.3.1.48) (E1A-associated protein p300) (Histone butyryltransferase p300) (EC 2.3.1.-) (Histone crotonyltransferase p300) (EC 2.3.1.-) (Protein propionyltransferase p300) (EC 2.3.1.-)	35	Multisubunit ACTR coactivator complex, p300-MDM2-p53 protein complex, p300-CBP-p270-SWI/SNF complex, p300-CBP-p270 complex, p33ING1b-p300 complex, ING1-p300-PCNA complex, pRb2/p130-multimolecular complex (RB2, E2F5, HDAC1, SUV39H1, P300), p300-SMAD1-STAT3 complex, PIAS3-SMAD3-P300 complex, HES1 promoter corepressor complex, HES1 promoter-Notch enhancer complex, SMAD1-P300 complex, Smad1-Notch1-p3…	3|5	8	4	2	1|0|0|0|0|0|1|2|0|0|0|0|0|0|0|0|0|0|0|0|0|0|0|0|0|0|0|0|0|0|2|0|0|0|0|0|0|0|0|0|0|0|0|0	0.98	X		X	X	X	X
ELF3	P78545	ENSG00000163435	Ets;_AT_hook	O15164	TIF1A	Transcription intermediary factor 1-alpha (TIF1-alpha) (EC 2.3.2.27) (E3 ubiquitin-protein ligase TRIM24) (RING finger protein 82) (RING-type E3 ubiquitin transferase TIF1-alpha) (Tripartite motif-containing protein 24)	33		3|3	6	3	2	4|1|1|0|1|0|1|1|3|0|0|0|0|0|0|0|0|0|0|0|0|0|0|0|0|0|0|0|0|0|2|2|0|0|0|0|0|0|0|0|0|0|0|0	0.8
ELF3	P78545	ENSG00000163435	Ets;_AT_hook	Q15906	VPS72	Vacuolar protein sorting-associated protein 72 homolog (Protein YL-1) (Transcription factor-like 1)	23	SRCAP-associated chromatin remodeling complex, NuA4/Tip60 HAT complex, DMAP1-associated complex	3|2	5	2.5	2	2|1|0|0|2|0|0|0|1|0|0|0|0|0|0|0|0|0|0|0|0|0|0|0|0|0|1|2|0|0|0|2|0|0|0|0|0|0|0|0|1|2|0|0	0.75
ELF3	P78545	ENSG00000163435	Ets;_AT_hook	Q9HAV7	GRPE1	GrpE protein homolog 1, mitochondrial (HMGE) (Mt-GrpE#1)	14		3|3	6	3	2	0|0|1|1|3|1|1|0|0|0|0|0|0|1|0|0|0|0|0|1|0|1|1|0|0|0|0|0|0|0|0|0|0|1|0|0|0|0|0|0|0|0|0|1	0.91
ELF3	P78545	ENSG00000163435	Ets;_AT_hook	Q9BY77	PDIP3	Polymerase delta-interacting protein 3 (46 kDa DNA polymerase delta interaction protein) (p46) (S6K1 Aly/REF-like target) (SKAR)	13		5|2	7	3.5	2	0|0|0|0|0|0|0|0|0|0|0|0|0|0|1|0|0|0|1|1|0|1|0|0|0|0|0|2|0|0|0|0|0|0|0|0|0|0|0|0|0|0|0|0	0.95
ELF3	P78545	ENSG00000163435	Ets;_AT_hook	P31942	HNRH3	Heterogeneous nuclear ribonucleoprotein H3 (hnRNP H3) (Heterogeneous nuclear ribonucleoprotein 2H9) (hnRNP 2H9)	9		4|3	7	3.5	2	1|1|3|2|3|3|4|2|2|1|0|0|0|0|0|0|0|0|0|0|0|0|0|0|0|0|0|0|0|0|0|0|0|0|0|0|0|0|0|0|0|0|0|0	0.76
ELF3	P78545	ENSG00000163435	Ets;_AT_hook	P78545	ELF3	ETS-related transcription factor Elf-3 (E74-like factor 3) (Epithelial-restricted with serine box) (Epithelium-restricted Ets protein ESX) (Epithelium-specific Ets transcription factor 1) (ESE-1)	1		14|12	26	13	2	0|0|0|0|0|0|0|0|0|0|0|0|0|0|0|0|0|0|0|0|0|0|0|0|0|0|0|0|0|0|0|0|0|0|0|0|0|0|0|0|0|0|0|0	1	X		X
ELF4	Q99607	ENSG00000102034	Ets	Q8NHM5	KDM2B	Lysine-specific demethylase 2B (EC 1.14.11.27) (CXXC-type zinc finger protein 2) (F-box and leucine-rich repeat protein 10) (F-box protein FBL10) (F-box/LRR-repeat protein 10) (JmjC domain-containing histone demethylation protein 1B) (Jumonji domain-containing EMSY-interactor methyltransferase motif protein) (Protein JEMMA) (Protein-containing CXXC domain 2) ([Histone-H3]-lysine-36 demethylase 1B)	62	BCOR complex	7|4	11	5.5	2	1|3|1|0|4|2|2|2|4|2|0|0|0|0|0|0|1|0|0|1|1|0|0|0|0|0|5|5|0|0|0|0|0|0|0|0|0|0|0|0|2|1|0|0	0.78
ELF4	Q99607	ENSG00000102034	Ets	O14686	KMT2D	Histone-lysine N-methyltransferase 2D (Lysine N-methyltransferase 2D) (EC 2.1.1.43) (ALL1-related protein) (Myeloid/lymphoid or mixed-lineage leukemia protein 2)	58	WDR5-ASH2L-RBBP5-MLL2 complex, ASCOM complex, MOF complex, UTX-MLL2/3 complex, PITX2-MLL4-ASH2L-RBBP5-PTIP complex, MLL2 complex, MLL4 complex	19|18	37	18.5	2	4|2|6|6|7|3|1|1|3|3|1|1|2|1|0|0|0|0|0|0|1|1|0|1|0|0|7|12|1|0|7|9|0|0|0|1|0|2|0|0|4|6|0|0	0.97
ELF4	Q99607	ENSG00000102034	Ets	O15550	KDM6A	Lysine-specific demethylase 6A (EC 1.14.11.-) (Histone demethylase UTX) (Ubiquitously-transcribed TPR protein on the X chromosome) (Ubiquitously-transcribed X chromosome tetratricopeptide repeat protein)	53	UTX-MLL2/3 complex, PTIP-HMT complex, MLL3 complex, MLL4 complex	6|5	11	5.5	2	3|1|3|0|4|0|2|1|1|1|0|0|0|0|0|0|0|0|0|0|0|0|0|0|0|0|0|0|0|0|2|3|0|0|0|0|0|0|0|0|2|1|0|0	0.93	X				X
ELF4	Q99607	ENSG00000102034	Ets	Q96RK0	CIC	Protein capicua homolog	52		14|14	28	14	2	13|9|7|5|9|4|13|3|10|7|1|0|0|0|2|1|0|1|0|0|0|0|0|1|0|2|13|15|2|1|5|5|0|0|3|2|0|2|0|0|8|3|1|0	0.75
ELF4	Q99607	ENSG00000102034	Ets	Q86U86	PB1	Protein polybromo-1 (hPB1) (BRG1-associated factor 180) (BAF180) (Polybromo-1D)	48	PBAF complex (Polybromo- and BAF containing complex), PBAF complex (Polybromo- and BAF containing complex), PBAF complex (Polybromo- and BAF containing complex), PBAF complex (Polybromo- and BAF containing complex), PBAF complex (Polybromo- and BAF containing complex)	35|37	72	36	2	6|2|12|8|14|10|2|3|4|2|1|1|0|0|2|0|5|0|0|0|0|0|0|1|1|0|2|3|0|0|1|6|0|0|0|4|0|2|0|0|14|24|8|4	0.99
ELF4	Q99607	ENSG00000102034	Ets	Q4LE39	ARI4B	AT-rich interactive domain-containing protein 4B (ARID domain-containing protein 4B) (180 kDa Sin3-associated polypeptide) (Sin3-associated polypeptide p180) (Breast cancer-associated antigen BRCAA1) (Histone deacetylase complex subunit SAP180) (Retinoblastoma-binding protein 1-like 1)	46	SAP complex (Sin3-associated protein complex), SAP complex (Sin3-associated protein complex), SIN3-HDAC-SAP30-ARID4 complex, SIN3-SAP25 complex, SIN3-HDAC-SAP30-ARID4 complex, BRMS1-RBP1 complex, SIN3-HDAC-SAP30-ARID4 complex, SIN3-ING1b complex I, SIN3-ING1b complex II, SIN3-SAP25 complex	6|6	12	6	2	3|4|3|0|1|1|1|0|1|1|3|2|2|1|0|3|2|0|1|1|2|2|2|2|0|0|2|1|2|1|3|4|0|0|2|0|0|0|0|0|2|3|1|1	0.93
ELF4	Q99607	ENSG00000102034	Ets	P51531	SMCA2	Probable global transcription activator SNF2L2 (EC 3.6.4.-) (ATP-dependent helicase SMARCA2) (BRG1-associated factor 190B) (BAF190B) (Protein brahma homolog) (hBRM) (SNF2-alpha) (SWI/SNF-related matrix-associated actin-dependent regulator of chromatin subfamily A member 2)	46	BAF complex, SWI-SNF chromatin remodeling-related-BRCA1 complex, BAF complex, Brm-associated complex, BRM-SIN3A complex, BRM-SIN3A-HDAC complex, BRM-associated complex, WINAC complex, BAF complex, BAF complex, ALL-1 supercomplex, RNA polymerase II complex (RPB1, RAP74, CDK8, CYCC, SRB7, BAF190, BAF47), chromatin structure modifying, RNA polymerase II complex, chromatin structure modifying, RNA po…	24|20	44	22	2	19|18|19|10|23|14|19|7|20|11|2|0|0|0|0|0|0|0|0|0|0|0|0|0|0|0|0|9|0|0|0|0|0|0|0|0|0|0|0|0|14|13|0|0	0.84
ELF4	Q99607	ENSG00000102034	Ets	Q9H582	ZN644	Zinc finger protein 644 (Zinc finger motif enhancer-binding protein 2) (Zep-2)	43		3|2	5	2.5	2	0|0|0|0|0|0|0|0|0|0|0|0|0|0|0|0|0|0|0|0|0|0|0|0|0|0|2|3|0|0|1|3|0|0|0|0|0|0|0|0|1|0|0|0	0.81
ELF4	Q99607	ENSG00000102034	Ets	Q9NPI1	BRD7	Bromodomain-containing protein 7 (75 kDa bromodomain protein) (Protein CELTIX-1)	40		13|9	22	11	2	0|0|1|1|1|0|1|0|0|0|0|0|0|0|0|0|0|0|0|0|0|0|0|0|0|0|0|1|0|0|0|3|0|0|0|1|0|0|0|0|1|2|0|2	1
ELF4	Q99607	ENSG00000102034	Ets	Q68CP9	ARID2	AT-rich interactive domain-containing protein 2 (ARID domain-containing protein 2) (BRG1-associated factor 200) (BAF200) (Zinc finger protein with activation potential) (Zipzap/p200)	39	PBAF complex (Polybromo- and BAF containing complex), PBAF complex (Polybromo- and BAF containing complex), PBAF complex (Polybromo- and BAF containing complex), PBAF complex (Polybromo- and BAF containing complex), PBAF complex (Polybromo- and BAF containing complex)	26|26	52	26	2	0|1|3|2|3|2|0|0|0|0|1|0|0|0|0|0|1|0|1|0|1|0|0|0|0|0|5|5|0|1|1|4|0|0|0|1|0|0|0|0|6|6|0|1	1
ELF4	Q99607	ENSG00000102034	Ets	Q96GM5	SMRD1	SWI/SNF-related matrix-associated actin-dependent regulator of chromatin subfamily D member 1 (60 kDa BRG-1/Brm-associated factor subunit A) (BRG1-associated factor 60A) (BAF60A) (SWI/SNF complex 60 kDa subunit)	39	NUMAC complex (nucleosomal methylation activator complex), PBAF complex (Polybromo- and BAF containing complex), BAF complex, PBAF complex (Polybromo- and BAF containing complex), BAF complex, PBAF complex (Polybromo- and BAF containing complex), BAF complex, PBAF complex (Polybromo- and BAF containing complex), BAF complex, Brg1-associated complex I, Brm-associated complex, BRG1-SIN3A complex, B…	17|15	32	16	2	9|13|10|6|13|8|9|3|10|5|0|0|0|0|2|0|2|0|0|2|0|1|0|0|0|0|5|7|3|3|9|10|1|2|3|5|0|2|0|0|10|9|3|3	0.79
ELF4	Q99607	ENSG00000102034	Ets	Q96KQ7	EHMT2	Histone-lysine N-methyltransferase EHMT2 (EC 2.1.1.-) (EC 2.1.1.43) (Euchromatic histone-lysine N-methyltransferase 2) (HLA-B-associated transcript 8) (Histone H3-K9 methyltransferase 3) (H3-K9-HMTase 3) (Lysine N-methyltransferase 1C) (Protein G9a)	38	CtBP complex, CtBP core complex, DNMT1-G9a-PCNA complex, DNMT1-G9a complex, E2F-6 complex	8|8	16	8	2	3|3|2|0|0|3|2|1|6|4|0|0|0|0|0|0|1|0|0|0|0|0|1|1|0|1|9|8|0|0|1|3|0|0|0|0|0|0|0|0|0|2|0|0	0.86
ELF4	Q99607	ENSG00000102034	Ets	Q4VC05	BCL7A	B-cell CLL/lymphoma 7 protein family member A	37		2|2	4	2	2	2|2|0|0|0|0|0|0|0|0|0|0|0|0|0|0|0|0|0|0|0|0|0|0|0|0|0|0|0|0|0|0|0|0|0|0|1|1|0|0|1|1|0|1	0.77
ELF4	Q99607	ENSG00000102034	Ets	Q92925	SMRD2	SWI/SNF-related matrix-associated actin-dependent regulator of chromatin subfamily D member 2 (60 kDa BRG-1/Brm-associated factor subunit B) (BRG1-associated factor 60B) (BAF60B)	37	SWI-SNF chromatin remodeling-related-BRCA1 complex, PBAF complex (Polybromo- and BAF containing complex), BAF complex, BRG1-SIN3A complex, BRM-SIN3A complex, LARC complex (LCR-associated remodeling complex), BRM-SIN3A-HDAC complex, BRM-associated complex, EBAFb complex, EBAFa complex	11|15	26	13	2	8|8|7|6|5|5|6|0|4|6|2|1|1|2|2|2|1|0|1|2|1|1|1|1|1|0|5|9|2|2|4|6|0|1|3|0|2|2|0|0|8|8|4|3	0.83
ELF4	Q99607	ENSG00000102034	Ets	Q8IWI9	MGAP	MAX gene-associated protein (MAX dimerization protein 5)	35	E2F-6 complex	44|48	92	46	2	2|1|4|0|4|0|2|0|2|0|1|2|2|1|1|0|1|0|1|1|0|0|0|0|0|0|11|10|0|1|8|11|0|0|0|2|0|3|0|0|4|8|0|0	1
ELF4	Q99607	ENSG00000102034	Ets	P54253	ATX1	Ataxin-1 (Spinocerebellar ataxia type 1 protein)	34		2|3	5	2.5	2	1|1|1|0|0|0|0|0|0|0|0|0|0|0|0|0|0|0|0|0|0|0|0|0|0|0|0|1|0|0|0|0|0|0|0|0|0|0|0|0|0|1|0|0	0.96
ELF4	Q99607	ENSG00000102034	Ets	O15164	TIF1A	Transcription intermediary factor 1-alpha (TIF1-alpha) (EC 2.3.2.27) (E3 ubiquitin-protein ligase TRIM24) (RING finger protein 82) (RING-type E3 ubiquitin transferase TIF1-alpha) (Tripartite motif-containing protein 24)	33		10|12	22	11	2	4|1|1|0|1|0|1|1|3|0|0|0|0|0|0|0|0|0|0|0|0|0|0|0|0|0|0|0|0|0|2|2|0|0|0|0|0|0|0|0|0|0|0|0	1
ELF4	Q99607	ENSG00000102034	Ets	Q7Z3K3	POGZ	Pogo transposable element with ZNF domain (Suppressor of hairy wing homolog 5) (Zinc finger protein 280E) (Zinc finger protein 635)	29		10|10	20	10	2	1|1|2|0|2|0|0|0|1|2|1|1|1|1|0|0|0|0|0|0|0|0|0|0|0|0|2|4|1|0|0|1|0|0|0|0|0|0|0|0|2|2|0|0	1
ELF4	Q99607	ENSG00000102034	Ets	Q96L91	EP400	E1A-binding protein p400 (EC 3.6.4.-) (CAG repeat protein 32) (Domino homolog) (hDomino) (Trinucleotide repeat-containing gene 12 protein) (p400 kDa SWI2/SNF2-related protein)	28	NuA4/Tip60 HAT complex, NuA4/Tip60 HAT complex, NuA4/Tip60-HAT complex A, DMAP1-associated complex, p400-associated complex, NuA4/Tip60 HAT complex, NuA4/Tip60 HAT complex	27|36	63	31.5	2	1|5|7|5|7|4|4|1|2|3|4|2|1|1|2|2|2|0|2|2|2|2|1|2|0|0|7|15|1|0|1|9|0|0|1|1|0|1|0|0|13|10|3|1	1
ELF4	Q99607	ENSG00000102034	Ets	O75461	E2F6	Transcription factor E2F6 (E2F-6)	26	E2F-6 complex, MLL1-WDR5 complex	4|7	11	5.5	2	0|1|0|1|0|0|1|0|1|1|0|0|0|0|0|0|0|0|0|0|0|0|0|0|0|0|2|1|0|0|0|2|0|0|0|0|0|0|0|0|0|1|0|0	1
ELF4	Q99607	ENSG00000102034	Ets	Q9UQR1	ZN148	Zinc finger protein 148 (Transcription factor ZBP-89) (Zinc finger DNA-binding protein 89)	25		5|3	8	4	2	0|2|1|0|0|0|1|1|1|1|0|0|0|0|1|0|0|0|0|0|0|0|0|0|0|0|2|1|0|0|1|4|0|0|0|0|0|0|0|0|0|1|0|0	0.88	X				X	X
ELF4	Q99607	ENSG00000102034	Ets	Q969R5	LMBL2	Lethal(3)malignant brain tumor-like protein 2 (H-l(3)mbt-like protein 2) (L(3)mbt-like protein 2)	25	E2F-6 complex	10|10	20	10	2	0|0|0|0|0|0|0|0|0|0|0|0|0|0|0|0|0|0|0|0|0|0|0|0|0|0|1|2|0|0|0|0|0|0|0|0|0|0|0|0|0|0|0|0	1
ELF4	Q99607	ENSG00000102034	Ets	P85037	FOXK1	Forkhead box protein K1 (Myocyte nuclear factor) (MNF)	24		5|3	8	4	2	1|1|0|0|0|0|0|0|1|0|0|0|0|0|0|0|0|0|0|0|0|0|0|0|0|0|1|0|0|0|0|0|0|0|0|0|0|0|0|0|0|0|0|0	0.99
ELF4	Q99607	ENSG00000102034	Ets	Q15906	VPS72	Vacuolar protein sorting-associated protein 72 homolog (Protein YL-1) (Transcription factor-like 1)	23	SRCAP-associated chromatin remodeling complex, NuA4/Tip60 HAT complex, DMAP1-associated complex	5|7	12	6	2	2|1|0|0|2|0|0|0|1|0|0|0|0|0|0|0|0|0|0|0|0|0|0|0|0|0|1|2|0|0|0|2|0|0|0|0|0|0|0|0|1|2|0|0	0.99
ELF4	Q99607	ENSG00000102034	Ets	Q9Y6X8	ZHX2	Zinc fingers and homeoboxes protein 2 (Alpha-fetoprotein regulator 1) (AFP regulator 1) (Regulator of AFP) (Zinc finger and homeodomain protein 2)	23		9|7	16	8	2	2|3|0|0|0|0|3|0|3|3|0|0|0|0|0|0|0|0|0|0|0|0|0|0|0|0|1|1|0|0|1|1|0|0|0|0|0|0|0|0|0|0|0|0	0.99
ELF4	Q99607	ENSG00000102034	Ets	Q92560	BAP1	Ubiquitin carboxyl-terminal hydrolase BAP1 (EC 3.4.19.12) (BRCA1-associated protein 1) (Cerebral protein 6)	22		13|11	24	12	2	1|1|1|2|0|0|1|0|1|0|0|0|0|0|0|1|0|0|0|0|0|0|0|0|0|0|2|3|0|0|0|0|0|0|0|0|0|0|0|0|1|1|0|0	1
ELF4	Q99607	ENSG00000102034	Ets	Q6MZP7	LIN54	Protein lin-54 homolog (CXC domain-containing protein 1)	22	LINC complex, S-phase, LINC core complex, LINC complex, quiescent cells	13|12	25	12.5	2	8|7|4|1|2|2|4|1|9|4|0|1|0|0|0|0|1|0|0|0|0|0|0|0|0|0|11|5|1|1|9|9|1|0|2|2|1|0|0|0|7|4|0|2	0.86
ELF4	Q99607	ENSG00000102034	Ets	Q96QT6	PHF12	PHD finger protein 12 (PHD factor 1) (Pf1)	22		20|17	37	18.5	2	1|0|2|0|3|1|2|0|1|0|1|3|2|0|3|1|1|0|1|1|1|1|0|0|0|0|0|5|0|0|0|3|0|0|0|0|0|0|0|0|2|3|0|0	1
ELF4	Q99607	ENSG00000102034	Ets	Q7Z589	EMSY	BRCA2-interacting transcriptional repressor EMSY	21	NIF-1-DBC1-EMSY complex	17|18	35	17.5	2	3|3|6|2|4|3|4|2|3|3|0|0|0|0|4|0|3|0|2|1|2|1|1|1|0|0|10|14|0|1|2|6|1|0|1|1|0|1|0|0|6|5|2|1	0.97
ELF4	Q99607	ENSG00000102034	Ets	Q8WUU5	GATD1	GATA zinc finger domain-containing protein 1 (Ocular development-associated gene protein)	21		5|5	10	5	2	1|3|1|2|0|1|1|1|1|1|0|0|0|0|0|0|0|0|0|0|0|0|0|0|0|0|0|0|0|0|0|2|0|0|0|1|0|0|0|0|1|2|0|1	0.99
ELF4	Q99607	ENSG00000102034	Ets	Q8WUB8	PHF10	PHD finger protein 10 (BRG1-associated factor 45a) (BAF45a) (XAP135)	21		6|6	12	6	2	2|1|0|0|0|1|1|1|2|1|0|0|1|0|1|0|0|0|1|0|0|0|0|0|0|0|1|2|0|0|2|2|0|0|0|0|0|0|0|0|2|5|1|0	0.96
ELF4	Q99607	ENSG00000102034	Ets	Q9NP50	SHCAF	SIN3-HDAC complex-associated factor (Protein FAM60A) (Tera protein homolog)	21		3|5	8	4	2	3|1|1|1|1|1|3|1|3|1|1|0|0|0|0|1|1|0|0|1|1|0|0|0|0|0|0|2|0|0|0|2|0|0|1|0|0|0|0|0|2|2|0|0	0.77
ELF4	Q99607	ENSG00000102034	Ets	P25490	TYY1	Transcriptional repressor protein YY1 (Delta transcription factor) (INO80 complex subunit S) (NF-E1) (Yin and yang 1) (YY-1)	21	Polycomb repressive complex 1 (PRC1, hPRC-H), Ku antigen-YY1-alphaMyHC promoter complex, YY1-Notch1-RBP-Jkappa complex, YY1-Notch1 complex, hs4 enhancer complex (faster migrating complex), hs4 enhancer complex (slow migrating complex), YY1-MDM2-p53 complex, EED-EZH-YY1 polycomb complex	3|4	7	3.5	2	1|2|0|0|2|0|1|0|0|0|0|0|0|0|0|0|0|0|0|0|0|0|0|0|0|1|0|0|0|0|2|1|0|0|0|0|0|0|0|0|0|0|0|0	0.95
ELF4	Q99607	ENSG00000102034	Ets	Q5VZL5	ZMYM4	Zinc finger MYM-type protein 4 (Zinc finger protein 262)	21		22|23	45	22.5	2	4|3|8|3|8|1|5|0|4|0|0|0|0|0|0|1|1|0|0|0|0|0|0|0|0|0|7|10|1|1|12|16|1|1|5|4|0|2|0|0|10|8|2|3	0.97
ELF4	Q99607	ENSG00000102034	Ets	Q15291	RBBP5	Retinoblastoma-binding protein 5 (RBBP-5) (Retinoblastoma-binding protein RBQ-3)	20	Menin-associated histone methyltransferase complex, MLL-HCF complex, ALL-1 supercomplex, WDR5-ASH2L-RBBP5-MLL2 complex, ASCOM complex, MOF complex, Set1B complex, Set1A complex, UTX-MLL2/3 complex, PTIP-HMT complex, MLL1-WDR5 complex, PITX2-MLL4-ASH2L-RBBP5-PTIP complex, MLL1 core complex, MLL2 complex, MLL3 complex, MLL1 complex, MLL4 complex, Set1A complex, Set1B complex, CUL4A-DDB1-RBBP5 compl…	13|15	28	14	2	6|6|6|4|9|6|5|3|4|4|2|0|0|0|1|1|4|0|0|0|1|0|0|0|0|1|2|3|0|0|4|3|0|0|0|1|0|0|0|0|2|0|0|2	0.96
ELF4	Q99607	ENSG00000102034	Ets	P49848	TAF6	Transcription initiation factor TFIID subunit 6 (RNA polymerase II TBP-associated factor subunit E) (Transcription initiation factor TFIID 70 kDa subunit) (TAF(II)70) (TAFII-70) (TAFII70) (Transcription initiation factor TFIID 80 kDa subunit) (TAF(II)80) (TAFII-80) (TAFII80)	18	TFIID complex, TFTC complex (TATA-binding protein-free TAF-II-containing complex), TFTC complex (TATA-binding protein-free TAF-II-containing complex), TFTC complex (TATA-binding protein-free TAF-II-containing complex), TFTC complex (TATA-binding protein-free TAF-II-containing complex), TFTC complex (TATA-binding protein-free TAF-II-containing complex), TFIID complex, TFIID-beta complex, TFTC comp…	22|22	44	22	2	5|5|8|3|8|4|5|1|7|3|2|1|1|1|0|0|2|0|1|0|0|1|0|0|0|1|3|3|3|3|8|9|0|1|2|1|0|0|0|0|5|3|3|2	1
ELF4	Q99607	ENSG00000102034	Ets	Q76L83	ASXL2	Putative Polycomb group protein ASXL2 (Additional sex combs-like protein 2)	17		6|6	12	6	2	2|1|0|1|0|0|0|0|1|1|0|0|0|0|0|0|0|0|0|0|0|0|0|0|0|0|0|0|0|0|0|0|0|0|0|0|0|0|0|0|1|0|0|0	1
ELF4	Q99607	ENSG00000102034	Ets	Q6P4R8	NFRKB	Nuclear factor related to kappa-B-binding protein (DNA-binding protein R kappa-B) (INO80 complex subunit G)	17	INO80 chromatin remodeling complex	12|10	22	11	2	0|0|0|0|0|0|0|0|0|0|0|0|0|0|0|0|0|0|0|0|0|0|0|0|0|0|0|3|0|0|0|0|0|0|0|0|0|0|0|0|0|0|0|0	1
ELF4	Q99607	ENSG00000102034	Ets	Q9UKY1	ZHX1	Zinc fingers and homeoboxes protein 1	16		3|3	6	3	2	1|0|0|0|0|0|2|1|1|0|0|0|0|0|0|0|0|0|0|0|0|0|0|0|0|0|0|0|0|0|0|1|0|0|0|0|0|0|0|0|0|0|0|0	0.98
ELF4	Q99607	ENSG00000102034	Ets	Q9H2F5	EPC1	Enhancer of polycomb homolog 1	15	NuA4/Tip60 HAT complex, NuA4/Tip60 HAT complex, NuA4/Tip60-HAT complex B, NuA4/Tip60-HAT complex A, DMAP1-associated complex, NuA4/Tip60 HAT complex, NuA4/Tip60 HAT complex	5|6	11	5.5	2	0|0|1|0|1|0|0|0|0|0|0|0|0|0|0|0|0|0|1|1|0|0|0|1|0|0|0|0|0|0|0|0|0|0|0|0|0|0|0|0|1|4|0|0	0.98
ELF4	Q99607	ENSG00000102034	Ets	Q9UMN6	KMT2B	Histone-lysine N-methyltransferase 2B (Lysine N-methyltransferase 2B) (EC 2.1.1.43) (Myeloid/lymphoid or mixed-lineage leukemia protein 4) (Trithorax homolog 2) (WW domain-binding protein 7) (WBP-7)	15	Menin-associated histone methyltransferase complex, PTIP-HMT complex	24|25	49	24.5	2	9|11|1|1|4|4|7|2|6|6|0|0|0|0|0|0|0|0|0|0|0|0|0|0|0|1|5|6|0|0|3|7|0|0|0|0|0|0|0|0|0|0|0|0	0.99
ELF4	Q99607	ENSG00000102034	Ets	Q06546	GABPA	GA-binding protein alpha chain (GABP subunit alpha) (Nuclear respiratory factor 2 subunit alpha) (Transcription factor E4TF1-60)	14		8|7	15	7.5	2	2|1|1|2|1|0|2|0|1|0|0|0|0|0|2|0|0|0|0|0|0|0|0|0|0|0|0|0|1|0|0|5|0|0|0|0|0|0|0|0|2|1|0|0	0.99	X				X	X
ELF4	Q99607	ENSG00000102034	Ets	Q15723	ELF2	ETS-related transcription factor Elf-2 (E74-like factor 2) (New ETS-related factor)	14		9|12	21	10.5	2	7|5|0|0|0|0|6|1|6|2|0|0|0|0|0|1|0|0|0|0|0|0|0|0|1|1|10|6|2|3|8|9|0|0|0|0|2|2|0|0|1|1|1|0	0.85	X				X
ELF4	Q99607	ENSG00000102034	Ets	Q9UBL3	ASH2L	Set1/Ash2 histone methyltransferase complex subunit ASH2 (ASH2-like protein)	14	Menin-associated histone methyltransferase complex, MLL-HCF complex, WDR5-ASH2L-RBBP5-MLL2 complex, ASCOM complex, HCF-1 complex, Set1B complex, Set1A complex, UTX-MLL2/3 complex, PTIP-HMT complex, MLL1-WDR5 complex, PITX2-MLL4-ASH2L-RBBP5-PTIP complex, MLL1 core complex, MLL2 complex, MLL3 complex, MLL1 complex, MLL4 complex, Set1A complex, Set1B complex, NIF1-ASH2L-RBBP5-WDR5 complex, WRAD comp…	17|17	34	17	2	11|12|14|5|10|5|13|4|13|8|6|3|4|2|6|0|8|0|2|3|4|3|0|0|0|2|3|3|2|0|5|6|0|2|1|1|2|4|0|0|9|9|3|3	0.79
ELF4	Q99607	ENSG00000102034	Ets	Q92830	KAT2A	Histone acetyltransferase KAT2A (EC 2.3.1.48) (General control of amino acid synthesis protein 5-like 2) (Histone acetyltransferase GCN5) (hGCN5) (Histone succinyltransferase KAT2A) (EC 2.3.1.-) (Lysine acetyltransferase 2A) (STAF97)	14	GCN5-TRRAP histone acetyltransferase complex, TFTC-type histone acetyl transferase complex, TFTC complex (TATA-binding protein-free TAF-II-containing complex), TFTC complex (TATA-binding protein-free TAF-II-containing complex), TFTC complex (TATA-binding protein-free TAF-II-containing complex), TFTC complex (TATA-binding protein-free TAF-II-containing complex), TFTC complex (TATA-binding protein-…	8|9	17	8.5	2	2|2|1|3|6|5|1|0|4|1|0|0|0|0|0|0|1|0|0|0|0|0|0|0|0|0|0|0|0|0|1|1|0|0|0|1|0|0|0|0|1|0|1|1	0.97
ELF4	Q99607	ENSG00000102034	Ets	P10244	MYBB	Myb-related protein B (B-Myb) (Myb-like protein 2)	14	LIN9-BMYB complex, LINC complex, S-phase	4|3	7	3.5	2	3|2|0|0|0|0|1|1|1|2|0|0|0|0|0|0|0|0|0|0|0|0|0|0|0|0|0|0|0|0|0|0|0|0|0|0|0|0|0|0|0|0|0|0	0.92
ELF4	Q99607	ENSG00000102034	Ets	Q12830	BPTF	Nucleosome-remodeling factor subunit BPTF (Bromodomain and PHD finger-containing transcription factor) (Fetal Alz-50 clone 1 protein) (Fetal Alzheimer antigen)	13	hNURF complex, hNURF complex	15|19	34	17	2	8|7|3|1|1|1|2|2|4|3|2|0|0|0|2|1|2|0|0|0|1|0|1|1|0|0|6|3|0|0|3|2|0|0|0|0|0|0|0|0|1|1|0|1	1
ELF4	Q99607	ENSG00000102034	Ets	Q9H3G5	CPVL	Probable serine carboxypeptidase CPVL (EC 3.4.16.-) (Carboxypeptidase, vitellogenic-like) (Vitellogenic carboxypeptidase-like protein) (VCP-like protein) (hVLP)	13		4|4	8	4	2	0|0|0|0|0|0|0|0|0|0|0|0|0|0|0|0|0|0|0|0|0|0|0|0|0|1|0|0|0|1|2|1|0|1|0|1|1|1|0|0|1|0|1|0	0.98
ELF4	Q99607	ENSG00000102034	Ets	Q92831	KAT2B	Histone acetyltransferase KAT2B (EC 2.3.1.48) (Histone acetyltransferase PCAF) (Histone acetylase PCAF) (Lysine acetyltransferase 2B) (P300/CBP-associated factor) (P/CAF)	13	Multisubunit ACTR coactivator complex, PCAF complex, PCAF complex, FOXO3-PCAF complex, oxidative stress stimulated, CREBBP-KAT2B-MYOD1 complex, Smad1-Notch1-p300-Pcaf complex, RNA polymerase II complex (CBP, PCAF, RPB1, BAF47, CYCC, CDK8), chromatin structure modifying, RNA polymerase II complex, incomplete (CBP, RPBI, PCAF, BAF47), chromatin structure modifying, RNA polymerase II complex, chroma…	5|5	10	5	2	0|0|0|0|0|0|0|0|0|0|0|0|0|0|0|0|0|0|0|0|0|0|0|0|0|0|0|3|0|0|0|0|0|0|0|0|0|0|0|0|0|0|0|0	1
ELF4	Q99607	ENSG00000102034	Ets	Q9BYE7	PCGF6	Polycomb group RING finger protein 6 (Mel18 and Bmi1-like RING finger) (RING finger protein 134)	13	E2F-6 complex	6|5	11	5.5	2	2|0|1|1|1|1|0|0|0|0|1|1|0|0|0|0|0|0|0|0|0|0|0|0|0|0|3|2|0|0|1|2|0|0|1|0|0|1|0|0|0|0|0|0	0.99
ELF4	Q99607	ENSG00000102034	Ets	Q71UM5	RS27L	40S ribosomal protein S27-like (Small ribosomal subunit protein eS27-like)	13		2|2	4	2	2	0|0|3|0|0|0|0|0|0|0|0|0|0|0|0|0|0|0|0|0|0|0|0|0|0|0|0|0|0|0|0|0|0|0|0|0|0|0|0|0|0|0|2|2	0.86
ELF4	Q99607	ENSG00000102034	Ets	O15047	SET1A	Histone-lysine N-methyltransferase SETD1A (EC 2.1.1.43) (Lysine N-methyltransferase 2F) (SET domain-containing protein 1A) (hSET1A) (Set1/Ash2 histone methyltransferase complex subunit SET1)	13	MOF complex, HCF-1 complex, Set1A complex, Set1A complex	40|41	81	40.5	2	11|11|9|4|7|5|4|3|7|3|2|1|1|1|0|0|0|0|0|1|1|1|0|0|1|0|7|3|2|0|7|5|0|0|0|1|0|1|0|0|4|4|1|0	1
ELF4	Q99607	ENSG00000102034	Ets	A6NHR9	SMHD1	Structural maintenance of chromosomes flexible hinge domain-containing protein 1 (SMC hinge domain-containing protein 1)	13		30|21	51	25.5	2	9|8|7|6|7|8|8|3|4|3|1|1|1|1|0|0|0|0|0|0|0|0|0|0|0|0|7|5|2|1|13|13|0|0|1|1|1|0|0|0|10|10|5|5	0.97
ELF4	Q99607	ENSG00000102034	Ets	Q5VWG9	TAF3	Transcription initiation factor TFIID subunit 3 (140 kDa TATA box-binding protein-associated factor) (TBP-associated factor 3) (Transcription initiation factor TFIID 140 kDa subunit) (TAF(II)140) (TAF140) (TAFII-140) (TAFII140)	12	DA complex, DAB complex	5|6	11	5.5	2	1|1|0|1|1|0|0|0|0|0|0|0|0|0|0|0|0|0|0|1|0|0|0|0|0|0|2|3|0|0|1|1|0|0|0|0|0|0|0|0|1|1|0|0	1
ELF4	Q99607	ENSG00000102034	Ets	O00268	TAF4	Transcription initiation factor TFIID subunit 4 (RNA polymerase II TBP-associated factor subunit C) (TBP-associated factor 4) (Transcription initiation factor TFIID 130 kDa subunit) (TAF(II)130) (TAFII-130) (TAFII130) (Transcription initiation factor TFIID 135 kDa subunit) (TAF(II)135) (TAFII-135) (TAFII135)	12	TFIID complex, TFTC complex (TATA-binding protein-free TAF-II-containing complex), TFTC complex (TATA-binding protein-free TAF-II-containing complex), TFTC complex (TATA-binding protein-free TAF-II-containing complex), TFTC complex (TATA-binding protein-free TAF-II-containing complex), TFTC complex (TATA-binding protein-free TAF-II-containing complex), TFIID complex, TFIID-beta complex, TFTC comp…	14|12	26	13	2	1|3|8|4|12|7|2|1|1|0|1|0|0|0|0|0|0|0|0|0|0|1|0|0|0|0|10|11|0|0|4|6|0|0|1|0|0|0|0|0|5|2|0|1	0.89
ELF4	Q99607	ENSG00000102034	Ets	Q15542	TAF5	Transcription initiation factor TFIID subunit 5 (Transcription initiation factor TFIID 100 kDa subunit) (TAF(II)100) (TAFII-100) (TAFII100)	12	TFIID complex, TFTC complex (TATA-binding protein-free TAF-II-containing complex), TFTC complex (TATA-binding protein-free TAF-II-containing complex), TFTC complex (TATA-binding protein-free TAF-II-containing complex), TFTC complex (TATA-binding protein-free TAF-II-containing complex), TFTC complex (TATA-binding protein-free TAF-II-containing complex), TFIID complex, TFIID-beta complex, TFTC comp…	15|13	28	14	2	6|7|10|6|8|4|4|2|5|2|1|0|1|0|0|0|0|0|0|0|0|0|0|0|0|0|1|4|0|0|5|4|0|0|0|1|0|1|0|0|2|3|0|1	0.95
ELF4	Q99607	ENSG00000102034	Ets	Q9Y4A5	TRRAP	Transformation/transcription domain-associated protein (350/400 kDa PCAF-associated factor) (PAF350/400) (STAF40) (Tra1 homolog)	12	GCN5-TRRAP histone acetyltransferase complex, TFTC-type histone acetyl transferase complex, TFTC complex (TATA-binding protein-free TAF-II-containing complex), TFTC complex (TATA-binding protein-free TAF-II-containing complex), TFTC complex (TATA-binding protein-free TAF-II-containing complex), TFTC complex (TATA-binding protein-free TAF-II-containing complex), TFTC complex (TATA-binding protein-…	11|7	18	9	2	0|0|2|1|2|0|2|0|0|0|0|0|0|0|0|0|0|0|0|0|0|0|0|0|0|0|0|0|0|0|0|1|1|0|0|0|0|0|0|0|0|0|0|0	1
ELF4	Q99607	ENSG00000102034	Ets	Q8IYH5	ZZZ3	ZZ-type zinc finger-containing protein 3	12	ATAC complex, GCN5-linked, ATAC complex, YEATS2-linked	18|19	37	18.5	2	4|6|18|4|16|6|7|1|4|3|6|6|5|2|5|3|3|0|0|1|3|3|0|3|2|0|7|12|1|2|4|4|3|0|3|3|1|1|0|0|12|7|3|4	0.89
ELF4	Q99607	ENSG00000102034	Ets	Q9P2N6	KANL3	KAT8 regulatory NSL complex subunit 3 (NSL complex protein NSL3) (Non-specific lethal 3 homolog) (Serum inhibited-related protein) (Testis development protein PRTD)	11		10|7	17	8.5	2	0|1|0|1|1|2|1|1|1|0|0|0|0|0|0|0|0|0|0|0|0|0|0|0|0|0|1|1|0|1|0|2|0|0|0|0|0|0|0|0|0|1|0|0	1
ELF4	Q99607	ENSG00000102034	Ets	O60264	SMCA5	SWI/SNF-related matrix-associated actin-dependent regulator of chromatin subfamily A member 5 (SWI/SNF-related matrix-associated actin-dependent regulator of chromatin A5) (EC 3.6.4.-) (Sucrose nonfermenting protein 2 homolog) (hSNF2H)	11	DNMT3B complex, SNF2H-BAZ1A complex, Polycomb repressive complex 1 (PRC1, hPRC-H), Polycomb repressive complex 1 (PRC1, hPRC-H), HuCHRAC complex, WICH complex, SNF2h-cohesin-NuRD complex, Remodeling and spacing factor (RSF) complex, SNF2H-BAZ1A complex, CEN complex, ALL-1 supercomplex, SNF2h-HDAC12 complex, Nucleolar remodeling complex (NoRC complex), B-WICH complex, B-WICH complex	8|17	25	12.5	2	10|6|4|5|8|4|1|3|2|2|0|1|0|0|1|0|3|0|0|0|0|0|0|0|0|2|4|6|0|0|2|2|0|0|0|0|0|0|0|0|4|4|0|3	0.86
ELF4	Q99607	ENSG00000102034	Ets	Q9UPN9	TRI33	E3 ubiquitin-protein ligase TRIM33 (EC 2.3.2.27) (Ectodermin homolog) (RET-fused gene 7 protein) (Protein Rfg7) (RING-type E3 ubiquitin transferase TRIM33) (Transcription intermediary factor 1-gamma) (TIF1-gamma) (Tripartite motif-containing protein 33)	11	Kaiso-NCOR complex, Ectodermin-SMAD4 complex, RSmad complex, TIF1gamma-SMAD2-SMAD3 complex	6|8	14	7	2	2|5|5|2|5|3|1|0|4|2|0|0|0|0|0|0|0|0|0|0|0|0|0|0|0|0|4|0|0|0|1|2|0|0|0|0|0|0|0|0|0|0|1|2	0.88
ELF4	Q99607	ENSG00000102034	Ets	Q9P0U4	CXXC1	CXXC-type zinc finger protein 1 (CpG-binding protein) (PHD finger and CXXC domain-containing protein 1)	10	Set1B complex, Set1A complex, Set1A complex, Set1B complex	12|9	21	10.5	2	5|3|3|1|7|1|4|0|5|0|1|0|0|1|0|0|0|0|0|0|0|0|0|0|0|0|0|0|0|0|4|2|0|0|0|0|0|0|0|0|1|0|0|0	0.96
ELF4	Q99607	ENSG00000102034	Ets	Q9BQ39	DDX50	ATP-dependent RNA helicase DDX50 (EC 3.6.4.13) (DEAD box protein 50) (Gu-beta) (Nucleolar protein Gu2)	10		3|3	6	3	2	0|0|0|0|0|0|4|0|0|0|0|0|0|0|0|0|0|0|0|0|0|0|0|0|0|0|2|2|0|0|0|0|0|0|0|0|0|0|0|0|0|0|3|0	0.87
ELF4	Q99607	ENSG00000102034	Ets	Q6VMQ6	MCAF1	Activating transcription factor 7-interacting protein 1 (ATF-interacting protein) (ATF-IP) (ATF7-interacting protein) (ATFa-associated modulator) (hAM) (MBD1-containing chromatin-associated factor 1) (P621)	10	MBD1-MCAF1-SETDB1 complex, SETDB1-containing HMTase complex, MBD1-MCAF complex	17|16	33	16.5	2	7|11|6|5|7|4|5|3|5|3|1|0|1|0|0|2|1|0|2|1|1|2|0|0|1|0|7|2|0|0|6|7|0|0|0|0|1|0|0|0|6|4|2|1	0.96
ELF4	Q99607	ENSG00000102034	Ets	Q16514	TAF12	Transcription initiation factor TFIID subunit 12 (Transcription initiation factor TFIID 20/15 kDa subunits) (TAFII-20/TAFII-15) (TAFII20/TAFII15)	10	TFTC complex (TATA-binding protein-free TAF-II-containing complex), TFTC complex (TATA-binding protein-free TAF-II-containing complex), TFTC complex (TATA-binding protein-free TAF-II-containing complex), TFTC complex (TATA-binding protein-free TAF-II-containing complex), TFTC complex (TATA-binding protein-free TAF-II-containing complex), TFIID complex, TFIID-beta complex, TFTC complex (TATA-bindi…	3|5	8	4	2	0|0|2|0|1|0|0|0|0|0|0|0|0|0|0|0|0|0|0|0|0|0|0|0|0|0|3|2|0|0|0|0|0|0|0|0|0|0|0|0|1|1|1|0	0.93
ELF4	Q99607	ENSG00000102034	Ets	Q9H0E9	BRD8	Bromodomain-containing protein 8 (Skeletal muscle abundant protein) (Skeletal muscle abundant protein 2) (Thyroid hormone receptor coactivating protein of 120 kDa) (TrCP120) (p120)	9	NuA4/Tip60 HAT complex, NuA4/Tip60 HAT complex, NuA4/Tip60-HAT complex A, DMAP1-associated complex, NuA4/Tip60 HAT complex, NuA4/Tip60 HAT complex	8|7	15	7.5	2	2|4|1|2|4|3|2|1|3|2|2|0|0|0|1|1|1|0|0|0|0|0|0|0|0|0|4|5|1|0|2|4|0|0|0|0|0|1|0|0|2|3|2|0	0.92
ELF4	Q99607	ENSG00000102034	Ets	Q05BQ5	MBTD1	MBT domain-containing protein 1	9		5|5	10	5	2	0|0|0|0|0|0|0|0|0|0|0|0|0|0|0|0|0|0|0|0|0|0|0|0|0|0|0|0|0|0|0|0|0|0|0|0|0|0|0|0|1|1|0|0	1
ELF4	Q99607	ENSG00000102034	Ets	Q96ES7	SGF29	SAGA-associated factor 29 (Coiled-coil domain-containing protein 101) (SAGA complex-associated factor 29)	9	SAGA complex, GCN5-linked, ATAC complex, GCN5-linked, STAGA complex, SPT3-linked, ATAC complex, YEATS2-linked	4|6	10	5	2	2|2|3|2|4|2|3|2|2|2|2|2|0|1|1|0|2|0|1|1|2|0|1|0|0|0|1|1|0|0|3|0|0|0|0|0|2|1|0|0|2|3|2|1	0.75
ELF4	Q99607	ENSG00000102034	Ets	Q6ZRS2	SRCAP	Helicase SRCAP (EC 3.6.4.-) (Domino homolog 2) (Snf2-related CBP activator)	9	SRCAP-associated chromatin remodeling complex, DMAP1-associated complex, NCOR1 complex	22|24	46	23	2	9|9|4|5|10|7|9|6|7|4|0|0|0|0|1|0|3|0|0|0|0|0|1|1|1|0|6|10|1|0|1|5|0|1|1|3|0|1|0|0|3|5|0|0	0.99
ELF4	Q99607	ENSG00000102034	Ets	O75478	TAD2A	Transcriptional adapter 2-alpha (Transcriptional adapter 2-like) (ADA2-like protein)	9	PCAF complex, PCAF complex, ATAC complex, GCN5-linked, ATAC complex, YEATS2-linked	6|9	15	7.5	2	2|1|4|4|7|3|2|0|3|3|1|1|1|0|0|0|0|0|0|1|0|1|0|0|0|0|2|2|1|0|0|2|0|0|0|0|0|0|0|0|6|3|1|1	0.85
ELF4	Q99607	ENSG00000102034	Ets	Q9NPF5	DMAP1	DNA methyltransferase 1-associated protein 1 (DNMAP1) (DNMT1-associated protein 1)	8	NuA4/Tip60 HAT complex, NuA4/Tip60 HAT complex, NuA4/Tip60-HAT complex B, NuA4/Tip60-HAT complex A, DMAP1-associated complex, DAXX-DNMT1-DMAP1 complex, RGS6-DNMT1-DMAP1 complex, NuA4/Tip60 HAT complex, NuA4/Tip60 HAT complex	13|15	28	14	2	4|6|6|2|4|5|5|1|4|4|2|2|2|1|2|1|4|1|1|2|0|2|2|2|0|1|2|5|2|4|3|6|1|2|2|1|0|0|0|0|11|9|2|3	0.96
ELF4	Q99607	ENSG00000102034	Ets	Q9ULG1	INO80	DNA helicase INO80 (hINO80) (EC 3.6.4.12) (INO80 complex subunit A) (Putative DNA helicase INO80 complex homolog 1)	8	INO80 chromatin remodeling complex	10|11	21	10.5	2	0|0|0|0|0|0|0|0|0|0|0|0|0|0|0|0|0|0|0|0|0|1|0|0|0|0|0|0|0|0|0|0|0|0|0|0|0|0|0|0|1|2|0|0	1
ELF4	Q99607	ENSG00000102034	Ets	Q9H9L4	KANL2	KAT8 regulatory NSL complex subunit 2 (NSL complex protein NSL2) (Non-specific lethal 2 homolog)	8		5|5	10	5	2	0|1|0|1|1|0|0|0|0|0|0|1|0|0|0|0|0|0|0|0|0|0|0|0|0|0|0|1|0|0|0|0|0|0|0|0|0|0|0|0|1|0|0|0	1
ELF4	Q99607	ENSG00000102034	Ets	Q96EZ8	MCRS1	Microspherule protein 1 (58 kDa microspherule protein) (Cell cycle-regulated factor p78) (INO80 complex subunit J) (MCRS2)	8	INO80 chromatin remodeling complex, DIPA-MCRS1 complex, MLL1-WDR5 complex, MSP58-RINT1 complex	6|5	11	5.5	2	0|1|0|0|0|0|2|0|2|1|0|0|0|0|0|0|0|0|0|0|0|0|0|0|0|0|2|0|0|0|0|0|0|0|0|0|0|0|0|0|0|0|0|0	1
ELF4	Q99607	ENSG00000102034	Ets	Q8NEM7	SP20H	Transcription factor SPT20 homolog (p38-interacting protein) (p38IP)	8	SAGA complex, GCN5-linked, STAGA complex, SPT3-linked	4|3	7	3.5	2	1|1|0|0|1|1|0|0|0|0|0|0|0|0|0|0|0|0|0|0|0|0|0|0|0|0|0|0|0|0|1|2|0|0|0|0|0|0|0|0|2|0|0|0	0.97
ELF4	Q99607	ENSG00000102034	Ets	Q9GZN1	ARP6	Actin-related protein 6 (hArp6) (hARPX)	7	SRCAP-associated chromatin remodeling complex	5|2	7	3.5	2	1|2|0|0|1|1|1|1|1|1|0|0|0|0|0|0|0|0|0|0|0|0|0|0|0|0|0|0|0|0|0|0|0|0|0|0|0|0|0|0|0|0|0|0	0.9
ELF4	Q99607	ENSG00000102034	Ets	Q52LR7	EPC2	Enhancer of polycomb homolog 2 (EPC-like)	7	NuA4/Tip60-HAT complex A, NuA4/Tip60 HAT complex	3|7	10	5	2	0|0|0|0|0|0|0|0|0|0|0|1|0|0|0|0|0|0|0|0|0|0|0|0|0|0|1|0|0|0|0|0|0|0|0|0|0|0|0|0|1|0|0|0	1
ELF4	Q99607	ENSG00000102034	Ets	P54198	HIRA	Protein HIRA (TUP1-like enhancer of split protein 1)	7	Histone H3.3 complex, ASF1-interacting protein complex	2|3	5	2.5	2	0|0|0|0|0|0|0|0|0|0|0|0|0|0|0|0|0|0|0|0|0|0|0|0|0|0|1|0|0|0|0|1|0|0|0|0|0|0|0|0|0|0|0|0	0.97
ELF4	Q99607	ENSG00000102034	Ets	Q7Z3B3	KANL1	KAT8 regulatory NSL complex subunit 1 (MLL1/MLL complex subunit KANSL1) (MSL1 homolog 1) (hMSL1v1) (NSL complex protein NSL1) (Non-specific lethal 1 homolog)	7	MSL complex, MLL1-WDR5 complex	11|7	18	9	2	1|2|1|1|1|0|1|0|0|0|0|0|0|0|0|0|0|0|0|0|0|0|0|0|0|0|1|2|0|0|0|0|0|0|0|0|0|0|0|0|0|0|0|0	1
ELF4	Q99607	ENSG00000102034	Ets	Q6P1X5	TAF2	Transcription initiation factor TFIID subunit 2 (150 kDa cofactor of initiator function) (RNA polymerase II TBP-associated factor subunit B) (TBP-associated factor 150 kDa) (Transcription initiation factor TFIID 150 kDa subunit) (TAF(II)150) (TAFII-150) (TAFII150)	7	TFIID complex, TFTC complex (TATA-binding protein-free TAF-II-containing complex), TFTC complex (TATA-binding protein-free TAF-II-containing complex), TFTC complex (TATA-binding protein-free TAF-II-containing complex), TFTC complex (TATA-binding protein-free TAF-II-containing complex), TFTC complex (TATA-binding protein-free TAF-II-containing complex), TFIID-beta complex, TFTC complex (TATA-bindi…	3|3	6	3	2	0|0|1|2|1|1|1|0|0|0|0|0|0|0|0|0|0|0|0|0|0|0|0|0|0|0|0|0|0|0|0|0|0|0|0|0|0|0|0|0|0|0|0|0	0.98
ELF4	Q99607	ENSG00000102034	Ets	O75529	TAF5L	TAF5-like RNA polymerase II p300/CBP-associated factor-associated factor 65 kDa subunit 5L (PCAF-associated factor 65 beta) (PAF65-beta)	7	GCN5-TRRAP histone acetyltransferase complex, TFTC complex (TATA-binding protein-free TAF-II-containing complex), TFTC complex (TATA-binding protein-free TAF-II-containing complex), TFTC complex (TATA-binding protein-free TAF-II-containing complex), TFTC complex (TATA-binding protein-free TAF-II-containing complex), TFTC complex (TATA-binding protein-free TAF-II-containing complex), TFTC complex …	7|8	15	7.5	2	2|1|0|1|3|1|2|1|0|0|0|0|0|0|0|0|0|0|0|0|0|0|0|0|0|0|2|2|0|0|1|0|0|0|0|0|0|0|0|0|0|0|0|0	1
ELF4	Q99607	ENSG00000102034	Ets	Q9H9F9	ARP5	Actin-related protein 5 (hARP5) (Sarcoma antigen NY-SAR-16)	6	INO80 chromatin remodeling complex	2|5	7	3.5	2	0|0|0|0|1|1|0|0|0|1|0|0|0|0|0|0|0|0|0|0|0|0|0|0|0|0|0|0|0|0|0|0|0|0|0|0|0|0|0|0|0|0|0|0	0.97
ELF4	Q99607	ENSG00000102034	Ets	Q92993	KAT5	Histone acetyltransferase KAT5 (EC 2.3.1.48) (60 kDa Tat-interactive protein) (Tip60) (Histone acetyltransferase HTATIP) (HIV-1 Tat interactive protein) (Lysine acetyltransferase 5) (cPLA(2)-interacting protein)	6	TIP60 histone acetylase complex, NuA4/Tip60 HAT complex, NuA4/Tip60 HAT complex, NuA4/Tip60-HAT complex B, NuA4/Tip60-HAT complex A, NuA4/Tip60 HAT complex, NuA4/Tip60 HAT complex	2|3	5	2.5	2	0|0|0|0|0|0|0|0|0|0|0|0|0|0|0|0|0|0|0|0|0|0|0|0|0|0|0|1|0|0|0|0|0|0|0|0|0|0|0|0|0|0|0|0	0.97
ELF4	Q99607	ENSG00000102034	Ets	Q9H7Z6	KAT8	Histone acetyltransferase KAT8 (EC 2.3.1.48) (Lysine acetyltransferase 8) (MOZ, YBF2/SAS3, SAS2 and TIP60 protein 1) (MYST-1) (hMOF)	6	MSL complex, MAF2 complex, MOF complex, MLL1-WDR5 complex	5|2	7	3.5	2	1|1|0|0|0|0|2|0|0|0|0|0|0|0|0|0|0|0|0|0|0|0|0|0|0|0|1|1|0|0|0|0|0|0|0|0|0|0|0|0|0|0|0|0	0.95
ELF4	Q99607	ENSG00000102034	Ets	Q9UBU8	MO4L1	Mortality factor 4-like protein 1 (MORF-related gene 15 protein) (Protein MSL3-1) (Transcription factor-like protein MRG15)	5	NuA4/Tip60 HAT complex, NuA4/Tip60 HAT complex, MRG15-PAM14-RB complex, MRG15-PAM14-RB complex, MAF2 complex, NuA4/Tip60-HAT complex B, NuA4/Tip60-HAT complex A, NuA4/Tip60 HAT complex, NuA4/Tip60 HAT complex	5|3	8	4	2	1|2|0|0|0|0|1|1|2|2|0|0|0|0|0|0|0|0|0|0|0|0|0|0|0|0|0|0|0|0|0|0|0|0|0|0|0|0|0|0|0|0|0|1	0.96
ELF4	Q99607	ENSG00000102034	Ets	Q8N1G0	ZN687	Zinc finger protein 687	5		11|14	25	12.5	2	1|2|6|1|6|1|3|0|3|0|3|1|1|0|0|1|1|0|0|1|0|0|0|1|0|0|2|3|1|0|3|5|1|0|0|0|0|0|0|0|2|2|0|0	0.99
ELF4	Q99607	ENSG00000102034	Ets	Q9H981	ARP8	Actin-related protein 8 (hArp8) (INO80 complex subunit N)	4	INO80 chromatin remodeling complex	2|3	5	2.5	2	0|0|0|0|0|0|0|0|0|0|0|0|0|0|0|0|0|0|0|0|0|0|0|0|0|0|0|0|0|0|0|0|0|0|0|0|0|0|0|0|0|0|0|0	0.97
ELF4	Q99607	ENSG00000102034	Ets	Q5T3J3	LRIF1	Ligand-dependent nuclear receptor-interacting factor 1 (Receptor-interacting factor 1)	4		10|10	20	10	2	0|0|0|0|0|0|0|0|0|0|0|0|0|0|0|0|0|0|0|0|0|0|0|0|0|0|0|0|0|0|0|0|0|0|0|0|0|0|0|0|0|0|0|0	1
ELF4	Q99607	ENSG00000102034	Ets	Q02086	SP2	Transcription factor Sp2	4		3|4	7	3.5	2	0|0|0|0|0|0|0|0|0|0|0|0|0|0|0|0|0|0|0|0|0|0|0|0|0|0|0|0|0|0|0|0|0|0|0|0|0|0|0|0|0|0|0|0	0.99
ELF4	Q99607	ENSG00000102034	Ets	Q8IXJ9	ASXL1	Putative Polycomb group protein ASXL1 (Additional sex combs-like protein 1)	3		2|3	5	2.5	2	0|1|0|0|0|0|0|0|1|0|0|0|0|0|0|0|0|0|0|0|0|0|0|0|0|0|0|0|0|0|0|0|0|0|0|0|0|0|0|0|0|0|0|0	0.97
ELF4	Q99607	ENSG00000102034	Ets	O94864	ST65G	STAGA complex 65 subunit gamma (Adenocarcinoma antigen ART1) (SPTF-associated factor 65 gamma) (STAF65gamma) (Suppressor of Ty 7-like)	3	STAGA complex, STAGA complex, SAGA complex, GCN5-linked, STAGA complex, SPT3-linked	4|3	7	3.5	2	1|3|1|1|2|0|1|1|1|0|0|0|0|0|0|0|0|0|0|0|0|0|0|0|0|0|3|2|0|0|3|1|0|0|0|0|0|0|0|0|2|1|0|0	0.77
ELF4	Q99607	ENSG00000102034	Ets	Q9Y5K5	UCHL5	Ubiquitin carboxyl-terminal hydrolase isozyme L5 (UCH-L5) (EC 3.4.19.12) (Ubiquitin C-terminal hydrolase UCH37) (Ubiquitin thioesterase L5)	3		3|3	6	3	2	0|0|0|0|0|0|0|0|0|0|0|0|0|0|0|0|0|0|0|0|0|0|0|0|0|0|0|0|0|0|0|0|0|0|0|0|0|0|0|0|0|0|0|0	0.99
ELF4	Q99607	ENSG00000102034	Ets	Q6PI98	IN80C	INO80 complex subunit C (IES6 homolog) (hIes6)	2	INO80 chromatin remodeling complex, MLL1-WDR5 complex	2|2	4	2	2	0|0|0|0|0|0|0|0|0|0|0|0|0|0|0|0|0|0|0|0|0|0|0|0|0|0|0|0|0|0|0|0|0|0|0|0|0|0|0|0|0|1|0|0	0.94
ELF4	Q99607	ENSG00000102034	Ets	Q99607	ELF4	ETS-related transcription factor Elf-4 (E74-like factor 4) (Myeloid Elf-1-like factor)	1		15|16	31	15.5	2	0|0|0|0|0|0|0|0|0|0|0|0|0|0|0|0|0|0|0|0|0|0|0|0|0|0|0|0|0|0|0|0|0|0|0|0|0|0|0|0|0|0|0|0	1
ELF4	Q99607	ENSG00000102034	Ets	Q96HI0	SENP5	Sentrin-specific protease 5 (EC 3.4.22.-) (Sentrin/SUMO-specific protease SENP5)	1		3|2	5	2.5	2	0|0|0|0|0|0|0|0|0|0|0|0|0|0|0|0|0|0|0|0|0|0|0|0|0|0|0|0|0|0|0|0|0|0|0|0|0|0|0|0|0|0|0|0	0.97
ELF5	Q9UKW6	ENSG00000135374	Ets	O14686	KMT2D	Histone-lysine N-methyltransferase 2D (Lysine N-methyltransferase 2D) (EC 2.1.1.43) (ALL1-related protein) (Myeloid/lymphoid or mixed-lineage leukemia protein 2)	58	WDR5-ASH2L-RBBP5-MLL2 complex, ASCOM complex, MOF complex, UTX-MLL2/3 complex, PITX2-MLL4-ASH2L-RBBP5-PTIP complex, MLL2 complex, MLL4 complex	21|23	44	22	2	4|2|6|6|7|3|1|1|3|3|1|1|2|1|0|0|0|0|0|0|1|1|0|1|0|0|7|12|1|0|7|9|0|0|0|1|0|2|0|0|4|6|0|0	0.99
ELF5	Q9UKW6	ENSG00000135374	Ets	O15550	KDM6A	Lysine-specific demethylase 6A (EC 1.14.11.-) (Histone demethylase UTX) (Ubiquitously-transcribed TPR protein on the X chromosome) (Ubiquitously-transcribed X chromosome tetratricopeptide repeat protein)	53	UTX-MLL2/3 complex, PTIP-HMT complex, MLL3 complex, MLL4 complex	12|9	21	10.5	2	3|1|3|0|4|0|2|1|1|1|0|0|0|0|0|0|0|0|0|0|0|0|0|0|0|0|0|0|0|0|2|3|0|0|0|0|0|0|0|0|2|1|0|0	1
ELF5	Q9UKW6	ENSG00000135374	Ets	Q04724	TLE1	Transducin-like enhancer protein 1 (E(Sp1) homolog) (Enhancer of split groucho-like protein 1) (ESG1)	53	TLE1 corepressor complex (MASH1 promoter-corepressor complex), OCT1-OBF1-DNA-TLE1 complex, TLE1-TLE2 complex, TLE1 homodimer complex, TLE-Histone H3 complex, Hes1-TLE1 complex, TLE1 corepressor complex (MASH1 promoter-corepressor complex), NK-3-Groucho-HIPK2-SIN3A-RbpA48-HDAC1 complex, NK-3-Groucho complex, HESX1-TLE1 complex, CUL4B-DDB1-TLE1 complex, TBX20-TLE1 repressor complex	8|6	14	7	2	7|6|4|0|4|0|8|0|9|5|0|0|0|0|0|0|0|0|0|0|0|0|0|0|0|0|1|1|0|0|1|1|0|0|0|0|0|0|0|0|0|0|0|0	0.81
ELF5	Q9UKW6	ENSG00000135374	Ets	Q86U86	PB1	Protein polybromo-1 (hPB1) (BRG1-associated factor 180) (BAF180) (Polybromo-1D)	48	PBAF complex (Polybromo- and BAF containing complex), PBAF complex (Polybromo- and BAF containing complex), PBAF complex (Polybromo- and BAF containing complex), PBAF complex (Polybromo- and BAF containing complex), PBAF complex (Polybromo- and BAF containing complex)	28|30	58	29	2	6|2|12|8|14|10|2|3|4|2|1|1|0|0|2|0|5|0|0|0|0|0|0|1|1|0|2|3|0|0|1|6|0|0|0|4|0|2|0|0|14|24|8|4	0.97
ELF5	Q9UKW6	ENSG00000135374	Ets	Q6ZW49	PAXI1	PAX-interacting protein 1 (PAX transactivation activation domain-interacting protein)	47	UTX-MLL2/3 complex, PTIP-HMT complex, PTIP-DNA damage response complex, PITX2-MLL4-ASH2L-RBBP5-PTIP complex, MLL3 complex, MLL4 complex	7|6	13	6.5	2	4|2|6|2|3|2|4|2|3|2|0|0|0|0|0|0|0|0|0|0|0|0|0|0|0|0|2|3|0|0|0|3|0|0|0|0|0|0|0|0|2|0|0|0	0.87
ELF5	Q9UKW6	ENSG00000135374	Ets	P51531	SMCA2	Probable global transcription activator SNF2L2 (EC 3.6.4.-) (ATP-dependent helicase SMARCA2) (BRG1-associated factor 190B) (BAF190B) (Protein brahma homolog) (hBRM) (SNF2-alpha) (SWI/SNF-related matrix-associated actin-dependent regulator of chromatin subfamily A member 2)	46	BAF complex, SWI-SNF chromatin remodeling-related-BRCA1 complex, BAF complex, Brm-associated complex, BRM-SIN3A complex, BRM-SIN3A-HDAC complex, BRM-associated complex, WINAC complex, BAF complex, BAF complex, ALL-1 supercomplex, RNA polymerase II complex (RPB1, RAP74, CDK8, CYCC, SRB7, BAF190, BAF47), chromatin structure modifying, RNA polymerase II complex, chromatin structure modifying, RNA po…	25|22	47	23.5	2	19|18|19|10|23|14|19|7|20|11|2|0|0|0|0|0|0|0|0|0|0|0|0|0|0|0|0|9|0|0|0|0|0|0|0|0|0|0|0|0|14|13|0|0	0.87
ELF5	Q9UKW6	ENSG00000135374	Ets	Q8NFD5	ARI1B	AT-rich interactive domain-containing protein 1B (ARID domain-containing protein 1B) (BRG1-associated factor 250b) (BAF250B) (BRG1-binding protein hELD/OSA1) (Osa homolog 2) (hOsa2) (p250R)	45	BAF complex, EBAFb complex, RSmad complex	14|20	34	17	2	12|14|5|3|10|4|9|2|9|3|0|0|0|0|0|0|1|0|0|0|0|0|0|0|1|0|12|19|0|2|4|8|0|0|1|0|0|0|0|0|1|1|0|0	0.87
ELF5	Q9UKW6	ENSG00000135374	Ets	Q92782	DPF1	Zinc finger protein neuro-d4 (BRG1-associated factor 45B) (BAF45B) (D4, zinc and double PHD fingers family 1)	45		8|6	14	7	2	0|0|2|0|0|0|0|0|0|0|0|0|0|0|0|0|0|0|0|0|0|0|0|0|0|0|0|0|0|0|0|1|0|0|0|0|0|0|0|0|0|0|0|0	1
ELF5	Q9UKW6	ENSG00000135374	Ets	Q92785	REQU	Zinc finger protein ubi-d4 (Apoptosis response zinc finger protein) (BRG1-associated factor 45D) (BAF45D) (D4, zinc and double PHD fingers family 2) (Protein requiem)	43	LARC complex (LCR-associated remodeling complex)	14|15	29	14.5	2	9|7|7|3|10|4|8|3|8|3|1|1|0|1|0|0|1|0|1|0|0|0|2|1|0|1|5|5|2|5|8|8|0|0|4|4|1|1|0|0|8|8|1|1	0.88
ELF5	Q9UKW6	ENSG00000135374	Ets	Q9H582	ZN644	Zinc finger protein 644 (Zinc finger motif enhancer-binding protein 2) (Zep-2)	43		4|2	6	3	2	0|0|0|0|0|0|0|0|0|0|0|0|0|0|0|0|0|0|0|0|0|0|0|0|0|0|2|3|0|0|1|3|0|0|0|0|0|0|0|0|1|0|0|0	0.85
ELF5	Q9UKW6	ENSG00000135374	Ets	O14497	ARI1A	AT-rich interactive domain-containing protein 1A (ARID domain-containing protein 1A) (B120) (BRG1-associated factor 250) (BAF250) (BRG1-associated factor 250a) (BAF250A) (Osa homolog 1) (hOSA1) (SWI-like protein) (SWI/SNF complex protein p270) (SWI/SNF-related, matrix-associated, actin-dependent regulator of chromatin subfamily F member 1) (hELD)	42	NUMAC complex (nucleosomal methylation activator complex), BAF complex, SWI-SNF chromatin remodeling-related-BRCA1 complex, BAF complex, BAF complex, BAF complex, p300-CBP-p270-SWI/SNF complex, p300-CBP-p270 complex, Brg1-associated complex I, Brm-associated complex, BRG1-SIN3A complex, BRM-SIN3A complex, SIN3-ING1b complex II, LARC complex (LCR-associated remodeling complex), BRG1-SIN3A-HDAC con…	39|46	85	42.5	2	23|26|17|5|20|10|15|4|18|4|3|3|2|1|1|0|2|0|0|0|0|0|1|1|1|2|30|40|5|4|20|24|1|0|7|8|4|9|0|0|19|17|3|5	0.92
ELF5	Q9UKW6	ENSG00000135374	Ets	Q9UPW6	SATB2	DNA-binding protein SATB2 (Special AT-rich sequence-binding protein 2)	42		7|10	17	8.5	2	0|5|3|2|4|2|0|0|7|3|0|0|0|0|0|0|0|0|0|0|0|0|0|0|0|2|4|2|0|0|0|0|0|0|0|0|2|1|0|0|0|3|0|0	0.92
ELF5	Q9UKW6	ENSG00000135374	Ets	Q08117	AES	Amino-terminal enhancer of split (Amino enhancer of split) (Gp130-associated protein GAM) (Grg-5) (Groucho-related protein 5) (Protein ESP1) (Protein GRG)	41		3|3	6	3	2	0|2|2|0|1|0|0|0|0|1|0|0|0|0|0|0|0|0|0|0|0|0|0|0|0|0|2|1|0|0|2|2|0|0|1|0|0|0|0|0|0|0|0|0	0.86
ELF5	Q9UKW6	ENSG00000135374	Ets	Q9NPI1	BRD7	Bromodomain-containing protein 7 (75 kDa bromodomain protein) (Protein CELTIX-1)	40		5|6	11	5.5	2	0|0|1|1|1|0|1|0|0|0|0|0|0|0|0|0|0|0|0|0|0|0|0|0|0|0|0|1|0|0|0|3|0|0|0|1|0|0|0|0|1|2|0|2	0.99
ELF5	Q9UKW6	ENSG00000135374	Ets	Q68CP9	ARID2	AT-rich interactive domain-containing protein 2 (ARID domain-containing protein 2) (BRG1-associated factor 200) (BAF200) (Zinc finger protein with activation potential) (Zipzap/p200)	39	PBAF complex (Polybromo- and BAF containing complex), PBAF complex (Polybromo- and BAF containing complex), PBAF complex (Polybromo- and BAF containing complex), PBAF complex (Polybromo- and BAF containing complex), PBAF complex (Polybromo- and BAF containing complex)	17|15	32	16	2	0|1|3|2|3|2|0|0|0|0|1|0|0|0|0|0|1|0|1|0|1|0|0|0|0|0|5|5|0|1|1|4|0|0|0|1|0|0|0|0|6|6|0|1	1
ELF5	Q9UKW6	ENSG00000135374	Ets	Q8NEZ4	KMT2C	Histone-lysine N-methyltransferase 2C (Lysine N-methyltransferase 2C) (EC 2.1.1.43) (Homologous to ALR protein) (Myeloid/lymphoid or mixed-lineage leukemia protein 3)	39	ASCOM complex, UTX-MLL2/3 complex, PTIP-HMT complex, MLL3 complex	2|3	5	2.5	2	1|0|0|0|1|1|0|0|0|1|0|0|0|0|0|0|0|0|0|0|0|0|0|0|0|0|0|1|0|0|0|0|0|0|0|0|0|0|0|0|0|0|0|0	0.96
ELF5	Q9UKW6	ENSG00000135374	Ets	Q96GM5	SMRD1	SWI/SNF-related matrix-associated actin-dependent regulator of chromatin subfamily D member 1 (60 kDa BRG-1/Brm-associated factor subunit A) (BRG1-associated factor 60A) (BAF60A) (SWI/SNF complex 60 kDa subunit)	39	NUMAC complex (nucleosomal methylation activator complex), PBAF complex (Polybromo- and BAF containing complex), BAF complex, PBAF complex (Polybromo- and BAF containing complex), BAF complex, PBAF complex (Polybromo- and BAF containing complex), BAF complex, PBAF complex (Polybromo- and BAF containing complex), BAF complex, Brg1-associated complex I, Brm-associated complex, BRG1-SIN3A complex, B…	17|15	32	16	2	9|13|10|6|13|8|9|3|10|5|0|0|0|0|2|0|2|0|0|2|0|1|0|0|0|0|5|7|3|3|9|10|1|2|3|5|0|2|0|0|10|9|3|3	0.79
ELF5	Q9UKW6	ENSG00000135374	Ets	Q9Y2X9	ZN281	Zinc finger protein 281 (GC-box-binding zinc finger protein 1) (Transcription factor ZBP-99) (Zinc finger DNA-binding protein 99)	37	UTX-MLL2/3 complex	10|10	20	10	2	8|5|3|3|4|5|4|3|6|3|0|0|0|0|0|0|1|0|0|1|1|0|0|0|0|0|8|6|0|0|4|7|0|0|0|0|1|0|0|0|3|1|0|0	0.85	X				X	X
ELF5	Q9UKW6	ENSG00000135374	Ets	Q92925	SMRD2	SWI/SNF-related matrix-associated actin-dependent regulator of chromatin subfamily D member 2 (60 kDa BRG-1/Brm-associated factor subunit B) (BRG1-associated factor 60B) (BAF60B)	37	SWI-SNF chromatin remodeling-related-BRCA1 complex, PBAF complex (Polybromo- and BAF containing complex), BAF complex, BRG1-SIN3A complex, BRM-SIN3A complex, LARC complex (LCR-associated remodeling complex), BRM-SIN3A-HDAC complex, BRM-associated complex, EBAFb complex, EBAFa complex	14|13	27	13.5	2	8|8|7|6|5|5|6|0|4|6|2|1|1|2|2|2|1|0|1|2|1|1|1|1|1|0|5|9|2|2|4|6|0|1|3|0|2|2|0|0|8|8|4|3	0.9
ELF5	Q9UKW6	ENSG00000135374	Ets	Q9H9B1	EHMT1	Histone-lysine N-methyltransferase EHMT1 (EC 2.1.1.-) (EC 2.1.1.43) (Euchromatic histone-lysine N-methyltransferase 1) (Eu-HMTase1) (G9a-like protein 1) (GLP) (GLP1) (Histone H3-K9 methyltransferase 5) (H3-K9-HMTase 5) (Lysine N-methyltransferase 1D)	34	CtBP complex, CtBP core complex, E2F-6 complex	9|9	18	9	2	7|6|1|0|4|0|9|1|8|4|0|0|0|0|0|0|0|0|0|0|0|0|0|0|1|0|6|9|1|0|5|10|0|0|0|0|1|0|0|0|0|2|0|0	0.79
ELF5	Q9UKW6	ENSG00000135374	Ets	O15164	TIF1A	Transcription intermediary factor 1-alpha (TIF1-alpha) (EC 2.3.2.27) (E3 ubiquitin-protein ligase TRIM24) (RING finger protein 82) (RING-type E3 ubiquitin transferase TIF1-alpha) (Tripartite motif-containing protein 24)	33		12|15	27	13.5	2	4|1|1|0|1|0|1|1|3|0|0|0|0|0|0|0|0|0|0|0|0|0|0|0|0|0|0|0|0|0|2|2|0|0|0|0|0|0|0|0|0|0|0|0	1
ELF5	Q9UKW6	ENSG00000135374	Ets	O95785	WIZ	Protein Wiz (Widely-interspaced zinc finger-containing protein) (Zinc finger protein 803)	33		9|10	19	9.5	2	8|10|3|3|3|5|9|2|10|2|0|0|0|0|0|0|0|0|0|0|0|0|0|0|0|0|11|6|0|0|6|9|0|0|0|0|1|1|0|0|1|4|0|0	0.74
ELF5	Q9UKW6	ENSG00000135374	Ets	Q6PJG2	EMSA1	ELM2 and SANT domain-containing protein 1 (MIDEAS)	32	MiDAC complex	3|4	7	3.5	2	0|0|0|0|0|0|0|0|0|0|0|1|0|0|1|0|1|0|3|1|1|2|1|1|0|0|0|0|0|0|0|0|0|0|0|0|0|0|0|0|0|0|0|0	0.93
ELF5	Q9UKW6	ENSG00000135374	Ets	Q04837	SSBP	Single-stranded DNA-binding protein, mitochondrial (Mt-SSB) (MtSSB) (PWP1-interacting protein 17)	28		2|3	5	2.5	2	0|0|0|0|0|0|0|0|0|0|0|0|0|0|0|0|0|0|0|0|0|0|0|0|0|0|0|0|0|0|0|0|0|0|0|0|0|0|0|0|0|0|0|0	0.97
ELF5	Q9UKW6	ENSG00000135374	Ets	Q8WUZ0	BCL7C	B-cell CLL/lymphoma 7 protein family member C	27		2|2	4	2	2	1|0|0|0|0|0|1|0|0|0|0|0|0|0|0|0|0|0|0|0|0|0|0|0|0|0|1|2|0|0|0|0|0|0|0|0|0|0|0|0|0|0|0|0	0.92
ELF5	Q9UKW6	ENSG00000135374	Ets	O75461	E2F6	Transcription factor E2F6 (E2F-6)	26	E2F-6 complex, MLL1-WDR5 complex	3|4	7	3.5	2	0|1|0|1|0|0|1|0|1|1|0|0|0|0|0|0|0|0|0|0|0|0|0|0|0|0|2|1|0|0|0|2|0|0|0|0|0|0|0|0|0|1|0|0	0.97
ELF5	Q9UKW6	ENSG00000135374	Ets	Q01826	SATB1	DNA-binding protein SATB1 (Special AT-rich sequence-binding protein 1)	26		8|8	16	8	2	8|5|3|0|0|0|6|3|6|3|1|1|1|0|0|1|0|0|0|0|0|0|0|0|0|0|3|2|0|0|6|2|0|0|0|0|0|0|0|0|5|3|0|0	0.83
ELF5	Q9UKW6	ENSG00000135374	Ets	Q15532	SSXT	Protein SSXT (Protein SYT) (Synovial sarcoma translocated to X chromosome protein)	18		2|3	5	2.5	2	0|1|1|0|2|0|1|0|1|0|0|0|0|0|0|0|0|0|0|0|0|0|0|1|0|0|1|1|0|0|1|1|0|0|0|1|0|0|0|0|1|0|0|0	0.78
ELF5	Q9UKW6	ENSG00000135374	Ets	Q9BY77	PDIP3	Polymerase delta-interacting protein 3 (46 kDa DNA polymerase delta interaction protein) (p46) (S6K1 Aly/REF-like target) (SKAR)	13		3|2	5	2.5	2	0|0|0|0|0|0|0|0|0|0|0|0|0|0|1|0|0|0|1|1|0|1|0|0|0|0|0|2|0|0|0|0|0|0|0|0|0|0|0|0|0|0|0|0	0.94
ELF5	Q9UKW6	ENSG00000135374	Ets	Q9UPN9	TRI33	E3 ubiquitin-protein ligase TRIM33 (EC 2.3.2.27) (Ectodermin homolog) (RET-fused gene 7 protein) (Protein Rfg7) (RING-type E3 ubiquitin transferase TRIM33) (Transcription intermediary factor 1-gamma) (TIF1-gamma) (Tripartite motif-containing protein 33)	11	Kaiso-NCOR complex, Ectodermin-SMAD4 complex, RSmad complex, TIF1gamma-SMAD2-SMAD3 complex	6|9	15	7.5	2	2|5|5|2|5|3|1|0|4|2|0|0|0|0|0|0|0|0|0|0|0|0|0|0|0|0|4|0|0|0|1|2|0|0|0|0|0|0|0|0|0|0|1|2	0.89
ELF5	Q9UKW6	ENSG00000135374	Ets	Q96KM6	Z512B	Zinc finger protein 512B	9		5|3	8	4	2	0|0|0|0|0|0|0|0|0|0|0|0|0|0|0|0|0|0|0|0|0|0|0|0|0|0|1|2|0|0|0|0|0|0|0|0|0|0|0|0|0|0|0|0	1
ELF5	Q9UKW6	ENSG00000135374	Ets	P52952	NKX25	Homeobox protein Nkx-2.5 (Cardiac-specific homeobox) (Homeobox protein CSX) (Homeobox protein NK-2 homolog E)	5		2|2	4	2	2	0|0|0|0|0|0|0|0|0|0|0|0|0|0|0|0|0|0|0|0|0|0|0|0|0|0|0|0|0|0|0|0|0|0|0|0|0|0|0|0|0|0|0|0	0.94	X				X	X
ELF5	Q9UKW6	ENSG00000135374	Ets	P68431	H31	Histone H3.1 (Histone H3/a) (Histone H3/b) (Histone H3/c) (Histone H3/d) (Histone H3/f) (Histone H3/h) (Histone H3/i) (Histone H3/j) (Histone H3/k) (Histone H3/l)	3	core-histone (H2A/H2B/H3/H4)-TDIF2-TDT complex, Histone H3.1 complex, ASF1-interacting protein complex, ASF1-histone containing complex, TLE-Histone H3 complex, MASH1 promoter-coactivator complex, Emerin regulatory complex, Emerin complex 24, Emerin complex 32, Codanin-1-Asf1\u2013histone H3.1-histone H4\u2013importin-4 complex, cytosolic, Histone-2-Histone-4-ASF1-MCM2 complex	3|3	6	3	2	0|0|0|0|0|0|0|0|0|0|0|0|0|0|0|0|0|0|0|0|0|0|0|0|0|0|0|0|0|0|0|0|0|0|0|0|0|4|0|0|3|2|0|0	0.89
ELF5	Q9UKW6	ENSG00000135374	Ets	Q9BQ87	TBL1Y	F-box-like/WD repeat-containing protein TBL1Y (Transducin beta-like protein 1Y) (Transducin-beta-like protein 1, Y-linked)	2	Emerin complex 32	6|7	13	6.5	2	0|0|0|0|0|0|0|0|0|0|0|0|0|0|0|0|0|0|0|0|0|0|0|0|0|0|0|0|0|3|0|0|0|0|0|0|0|0|0|0|0|0|0|0	1
ELF5	Q9UKW6	ENSG00000135374	Ets	Q9UKW6	ELF5	ETS-related transcription factor Elf-5 (E74-like factor 5) (Epithelium-restricted ESE-1-related Ets factor) (Epithelium-specific Ets transcription factor 2) (ESE-2)	1		16|16	32	16	2	0|0|0|0|0|0|0|0|0|0|0|0|0|0|0|0|0|0|0|0|0|0|0|0|0|0|0|0|0|0|0|0|0|0|0|0|0|0|0|0|0|0|0|0	1
ELK3	P41970	ENSG00000111145	Ets	Q8NHM5	KDM2B	Lysine-specific demethylase 2B (EC 1.14.11.27) (CXXC-type zinc finger protein 2) (F-box and leucine-rich repeat protein 10) (F-box protein FBL10) (F-box/LRR-repeat protein 10) (JmjC domain-containing histone demethylation protein 1B) (Jumonji domain-containing EMSY-interactor methyltransferase motif protein) (Protein JEMMA) (Protein-containing CXXC domain 2) ([Histone-H3]-lysine-36 demethylase 1B)	62	BCOR complex	16|18	34	17	2	1|3|1|0|4|2|2|2|4|2|0|0|0|0|0|0|1|0|0|1|1|0|0|0|0|0|5|5|0|0|0|0|0|0|0|0|0|0|0|0|2|1|0|0	1
ELK3	P41970	ENSG00000111145	Ets	Q12857	NFIA	Nuclear factor 1 A-type (NF1-A) (Nuclear factor 1/A) (CCAAT-box-binding transcription factor) (CTF) (Nuclear factor I/A) (NF-I/A) (NFI-A) (TGGCA-binding protein)	54		3|6	9	4.5	2	4|2|3|0|0|0|3|0|3|0|0|0|1|0|0|0|0|0|0|0|0|0|0|0|0|0|1|0|0|3|3|0|0|0|0|0|0|0|0|0|0|1|0|0	0.8
ELK3	P41970	ENSG00000111145	Ets	O15550	KDM6A	Lysine-specific demethylase 6A (EC 1.14.11.-) (Histone demethylase UTX) (Ubiquitously-transcribed TPR protein on the X chromosome) (Ubiquitously-transcribed X chromosome tetratricopeptide repeat protein)	53	UTX-MLL2/3 complex, PTIP-HMT complex, MLL3 complex, MLL4 complex	4|4	8	4	2	3|1|3|0|4|0|2|1|1|1|0|0|0|0|0|0|0|0|0|0|0|0|0|0|0|0|0|0|0|0|2|3|0|0|0|0|0|0|0|0|2|1|0|0	0.81
ELK3	P41970	ENSG00000111145	Ets	Q04724	TLE1	Transducin-like enhancer protein 1 (E(Sp1) homolog) (Enhancer of split groucho-like protein 1) (ESG1)	53	TLE1 corepressor complex (MASH1 promoter-corepressor complex), OCT1-OBF1-DNA-TLE1 complex, TLE1-TLE2 complex, TLE1 homodimer complex, TLE-Histone H3 complex, Hes1-TLE1 complex, TLE1 corepressor complex (MASH1 promoter-corepressor complex), NK-3-Groucho-HIPK2-SIN3A-RbpA48-HDAC1 complex, NK-3-Groucho complex, HESX1-TLE1 complex, CUL4B-DDB1-TLE1 complex, TBX20-TLE1 repressor complex	9|6	15	7.5	2	7|6|4|0|4|0|8|0|9|5|0|0|0|0|0|0|0|0|0|0|0|0|0|0|0|0|1|1|0|0|1|1|0|0|0|0|0|0|0|0|0|0|0|0	0.83
ELK3	P41970	ENSG00000111145	Ets	P15822	ZEP1	Zinc finger protein 40 (Cirhin interaction protein) (CIRIP) (Gate keeper of apoptosis-activating protein) (GAAP) (Human immunodeficiency virus type I enhancer-binding protein 1) (HIV-EP1) (Major histocompatibility complex-binding protein 1) (MBP-1) (Positive regulatory domain II-binding factor 1) (PRDII-BF1)	52		16|11	27	13.5	2	1|1|1|1|0|2|2|0|1|1|0|0|0|0|0|0|0|0|0|0|0|0|0|2|0|0|1|1|0|0|1|2|0|0|0|0|0|0|0|0|1|0|0|0	1	X				X	X
ELK3	P41970	ENSG00000111145	Ets	Q96RK0	CIC	Protein capicua homolog	52		22|18	40	20	2	13|9|7|5|9|4|13|3|10|7|1|0|0|0|2|1|0|1|0|0|0|0|0|1|0|2|13|15|2|1|5|5|0|0|3|2|0|2|0|0|8|3|1|0	0.91
ELK3	P41970	ENSG00000111145	Ets	Q9UHF7	TRPS1	Zinc finger transcription factor Trps1 (Tricho-rhino-phalangeal syndrome type I protein) (Zinc finger protein GC79)	50		15|12	27	13.5	2	0|0|3|0|1|0|0|0|0|0|0|1|0|1|0|0|0|0|0|0|0|0|0|0|0|0|6|7|0|1|2|4|0|0|0|0|0|0|0|0|0|0|0|0	0.99
ELK3	P41970	ENSG00000111145	Ets	Q6W2J9	BCOR	BCL-6 corepressor (BCoR)	48	BCOR complex	62|54	116	58	2	32|31|21|10|29|12|29|11|29|18|11|7|10|7|3|4|7|2|3|3|1|4|0|1|0|4|40|35|7|8|16|31|1|3|6|5|5|7|0|0|20|16|4|5	0.95
ELK3	P41970	ENSG00000111145	Ets	Q9Y618	NCOR2	Nuclear receptor corepressor 2 (N-CoR2) (CTG repeat protein 26) (SMAP270) (Silencing mediator of retinoic acid and thyroid hormone receptor) (SMRT) (T3 receptor-associating factor) (TRAC) (Thyroid-, retinoic-acid-receptor-associated corepressor)	48	SMRT complex, NCOR-SIN3-RPD3 complex, NCOR-SIN3-HDAC1 complex, SMRT core complex, SMRT core complex, NCOR2 complex, SMRT-SKIP-CBF1 complex, CBF1-HDAC1-SMRT complex, NCOR-SIN3-HDAC-HESX1 complex, HERP1/HEY2-NCOR-SIN3A complex	17|13	30	15	2	4|6|4|2|2|1|6|2|7|5|0|0|0|0|0|0|0|0|0|0|0|0|0|0|0|0|17|9|0|0|9|6|0|0|0|0|0|0|0|0|4|3|0|0	0.91
ELK3	P41970	ENSG00000111145	Ets	Q86U86	PB1	Protein polybromo-1 (hPB1) (BRG1-associated factor 180) (BAF180) (Polybromo-1D)	48	PBAF complex (Polybromo- and BAF containing complex), PBAF complex (Polybromo- and BAF containing complex), PBAF complex (Polybromo- and BAF containing complex), PBAF complex (Polybromo- and BAF containing complex), PBAF complex (Polybromo- and BAF containing complex)	20|15	35	17.5	2	6|2|12|8|14|10|2|3|4|2|1|1|0|0|2|0|5|0|0|0|0|0|0|1|1|0|2|3|0|0|1|6|0|0|0|4|0|2|0|0|14|24|8|4	0.85
ELK3	P41970	ENSG00000111145	Ets	Q4LE39	ARI4B	AT-rich interactive domain-containing protein 4B (ARID domain-containing protein 4B) (180 kDa Sin3-associated polypeptide) (Sin3-associated polypeptide p180) (Breast cancer-associated antigen BRCAA1) (Histone deacetylase complex subunit SAP180) (Retinoblastoma-binding protein 1-like 1)	46	SAP complex (Sin3-associated protein complex), SAP complex (Sin3-associated protein complex), SIN3-HDAC-SAP30-ARID4 complex, SIN3-SAP25 complex, SIN3-HDAC-SAP30-ARID4 complex, BRMS1-RBP1 complex, SIN3-HDAC-SAP30-ARID4 complex, SIN3-ING1b complex I, SIN3-ING1b complex II, SIN3-SAP25 complex	10|11	21	10.5	2	3|4|3|0|1|1|1|0|1|1|3|2|2|1|0|3|2|0|1|1|2|2|2|2|0|0|2|1|2|1|3|4|0|0|2|0|0|0|0|0|2|3|1|1	1
ELK3	P41970	ENSG00000111145	Ets	Q9H582	ZN644	Zinc finger protein 644 (Zinc finger motif enhancer-binding protein 2) (Zep-2)	43		7|6	13	6.5	2	0|0|0|0|0|0|0|0|0|0|0|0|0|0|0|0|0|0|0|0|0|0|0|0|0|0|2|3|0|0|1|3|0|0|0|0|0|0|0|0|1|0|0|0	0.99
ELK3	P41970	ENSG00000111145	Ets	Q9BSM1	PCGF1	Polycomb group RING finger protein 1 (Nervous system Polycomb-1) (NSPc1) (RING finger protein 68)	42	BCOR complex	6|4	10	5	2	3|1|1|1|1|1|1|2|3|0|1|0|0|0|1|1|1|0|1|0|0|0|0|0|0|1|1|1|1|0|1|1|0|0|0|0|0|1|0|0|0|2|0|0	0.92
ELK3	P41970	ENSG00000111145	Ets	Q9UPW6	SATB2	DNA-binding protein SATB2 (Special AT-rich sequence-binding protein 2)	42		9|5	14	7	2	0|5|3|2|4|2|0|0|7|3|0|0|0|0|0|0|0|0|0|0|0|0|0|0|0|2|4|2|0|0|0|0|0|0|0|0|2|1|0|0|0|3|0|0	0.84
ELK3	P41970	ENSG00000111145	Ets	P0C7T5	ATX1L	Ataxin-1-like (Brother of ataxin-1) (Brother of ATXN1)	40		3|2	5	2.5	2	1|0|0|0|0|0|0|0|0|0|0|0|0|0|0|0|1|0|0|0|0|0|0|0|0|0|0|1|0|0|0|0|0|0|0|0|0|0|0|0|0|0|0|0	0.97
ELK3	P41970	ENSG00000111145	Ets	Q9NPI1	BRD7	Bromodomain-containing protein 7 (75 kDa bromodomain protein) (Protein CELTIX-1)	40		3|3	6	3	2	0|0|1|1|1|0|1|0|0|0|0|0|0|0|0|0|0|0|0|0|0|0|0|0|0|0|0|1|0|0|0|3|0|0|0|1|0|0|0|0|1|2|0|2	0.86
ELK3	P41970	ENSG00000111145	Ets	Q9P2D1	CHD7	Chromodomain-helicase-DNA-binding protein 7 (CHD-7) (EC 3.6.4.12) (ATP-dependent helicase CHD7)	40		13|10	23	11.5	2	0|10|0|0|0|0|14|0|10|0|0|0|0|0|0|0|0|0|0|0|0|3|0|0|0|0|11|14|0|0|5|7|0|0|0|0|0|0|0|0|7|4|0|0	0.84
ELK3	P41970	ENSG00000111145	Ets	Q96KQ7	EHMT2	Histone-lysine N-methyltransferase EHMT2 (EC 2.1.1.-) (EC 2.1.1.43) (Euchromatic histone-lysine N-methyltransferase 2) (HLA-B-associated transcript 8) (Histone H3-K9 methyltransferase 3) (H3-K9-HMTase 3) (Lysine N-methyltransferase 1C) (Protein G9a)	38	CtBP complex, CtBP core complex, DNMT1-G9a-PCNA complex, DNMT1-G9a complex, E2F-6 complex	6|8	14	7	2	3|3|2|0|0|3|2|1|6|4|0|0|0|0|0|0|1|0|0|0|0|0|1|1|0|1|9|8|0|0|1|3|0|0|0|0|0|0|0|0|0|2|0|0	0.8
ELK3	P41970	ENSG00000111145	Ets	O00712	NFIB	Nuclear factor 1 B-type (NF1-B) (Nuclear factor 1/B) (CCAAT-box-binding transcription factor) (CTF) (Nuclear factor I/B) (NF-I/B) (NFI-B) (TGGCA-binding protein)	38		2|3	5	2.5	2	0|0|0|0|1|1|0|0|0|0|0|0|0|0|0|0|0|0|0|0|0|0|0|0|0|0|0|0|0|0|2|1|0|0|0|0|0|0|0|0|0|0|0|0	0.95
ELK3	P41970	ENSG00000111145	Ets	Q9Y2X9	ZN281	Zinc finger protein 281 (GC-box-binding zinc finger protein 1) (Transcription factor ZBP-99) (Zinc finger DNA-binding protein 99)	37	UTX-MLL2/3 complex	15|12	27	13.5	2	8|5|3|3|4|5|4|3|6|3|0|0|0|0|0|0|1|0|0|1|1|0|0|0|0|0|8|6|0|0|4|7|0|0|0|0|1|0|0|0|3|1|0|0	0.94
ELK3	P41970	ENSG00000111145	Ets	P13056	NR2C1	Nuclear receptor subfamily 2 group C member 1 (Orphan nuclear receptor TR2) (Testicular receptor 2)	36		9|5	14	7	2	2|2|0|0|0|0|1|0|0|1|0|0|0|0|0|0|0|0|0|0|0|0|0|0|0|1|0|1|0|0|1|0|0|0|0|0|0|0|0|0|0|0|1|0	1
ELK3	P41970	ENSG00000111145	Ets	Q9H334	FOXP1	Forkhead box protein P1 (Mac-1-regulated forkhead) (MFH)	35		5|6	11	5.5	2	1|2|0|0|0|0|1|0|0|0|0|0|0|0|0|0|0|0|0|0|0|0|0|0|0|0|1|2|0|0|2|1|0|0|0|0|0|0|0|0|0|0|0|0	1	X				X	X
ELK3	P41970	ENSG00000111145	Ets	Q8IWI9	MGAP	MAX gene-associated protein (MAX dimerization protein 5)	35	E2F-6 complex	28|23	51	25.5	2	2|1|4|0|4|0|2|0|2|0|1|2|2|1|1|0|1|0|1|1|0|0|0|0|0|0|11|10|0|1|8|11|0|0|0|2|0|3|0|0|4|8|0|0	0.99
ELK3	P41970	ENSG00000111145	Ets	P54253	ATX1	Ataxin-1 (Spinocerebellar ataxia type 1 protein)	34		3|3	6	3	2	1|1|1|0|0|0|0|0|0|0|0|0|0|0|0|0|0|0|0|0|0|0|0|0|0|0|0|1|0|0|0|0|0|0|0|0|0|0|0|0|0|1|0|0	0.99
ELK3	P41970	ENSG00000111145	Ets	Q9H9B1	EHMT1	Histone-lysine N-methyltransferase EHMT1 (EC 2.1.1.-) (EC 2.1.1.43) (Euchromatic histone-lysine N-methyltransferase 1) (Eu-HMTase1) (G9a-like protein 1) (GLP) (GLP1) (Histone H3-K9 methyltransferase 5) (H3-K9-HMTase 5) (Lysine N-methyltransferase 1D)	34	CtBP complex, CtBP core complex, E2F-6 complex	12|9	21	10.5	2	7|6|1|0|4|0|9|1|8|4|0|0|0|0|0|0|0|0|0|0|0|0|0|0|1|0|6|9|1|0|5|10|0|0|0|0|1|0|0|0|0|2|0|0	0.84
ELK3	P41970	ENSG00000111145	Ets	O95785	WIZ	Protein Wiz (Widely-interspaced zinc finger-containing protein) (Zinc finger protein 803)	33		12|12	24	12	2	8|10|3|3|3|5|9|2|10|2|0|0|0|0|0|0|0|0|0|0|0|0|0|0|0|0|11|6|0|0|6|9|0|0|0|0|1|1|0|0|1|4|0|0	0.84
ELK3	P41970	ENSG00000111145	Ets	Q8IVH2	FOXP4	Forkhead box protein P4 (Fork head-related protein-like A)	32		7|5	12	6	2	0|1|0|0|0|0|0|0|0|0|0|0|0|0|0|0|0|0|0|0|0|0|0|0|0|0|1|0|0|0|2|0|0|0|0|0|0|0|0|0|0|0|0|0	1	X				X	X
ELK3	P41970	ENSG00000111145	Ets	Q86UP3	ZFHX4	Zinc finger homeobox protein 4 (Zinc finger homeodomain protein 4) (ZFH-4)	31		8|7	15	7.5	2	0|0|1|0|1|0|0|0|0|0|2|2|2|1|0|0|0|0|0|0|0|0|0|0|0|0|1|3|1|0|1|2|0|0|0|0|1|0|0|0|0|0|0|0	1
ELK3	P41970	ENSG00000111145	Ets	Q9NQB0	TF7L2	Transcription factor 7-like 2 (HMG box transcription factor 4) (T-cell-specific transcription factor 4) (T-cell factor 4) (TCF-4) (hTCF-4)	30	Bipartite complex (TFC4, CTNNB1)	3|3	6	3	2	2|0|0|0|0|0|0|0|0|0|0|0|0|0|0|0|0|0|0|0|0|0|0|0|0|0|0|0|0|0|0|0|0|0|0|0|0|0|0|0|0|0|0|0	0.99
ELK3	P41970	ENSG00000111145	Ets	Q5PSV4	BRM1L	Breast cancer metastasis-suppressor 1-like protein (BRMS1-homolog protein p40) (BRMS1-like protein p40)	29	ING2 complex	5|7	12	6	2	2|5|2|1|2|5|1|0|1|1|0|0|0|0|0|0|1|0|0|0|0|0|0|0|0|0|2|4|0|0|0|0|0|0|1|1|1|1|0|0|3|5|2|2	0.81
ELK3	P41970	ENSG00000111145	Ets	Q7Z3K3	POGZ	Pogo transposable element with ZNF domain (Suppressor of hairy wing homolog 5) (Zinc finger protein 280E) (Zinc finger protein 635)	29		5|9	14	7	2	1|1|2|0|2|0|0|0|1|2|1|1|1|1|0|0|0|0|0|0|0|0|0|0|0|0|2|4|1|0|0|1|0|0|0|0|0|0|0|0|2|2|0|0	0.97
ELK3	P41970	ENSG00000111145	Ets	Q96L91	EP400	E1A-binding protein p400 (EC 3.6.4.-) (CAG repeat protein 32) (Domino homolog) (hDomino) (Trinucleotide repeat-containing gene 12 protein) (p400 kDa SWI2/SNF2-related protein)	28	NuA4/Tip60 HAT complex, NuA4/Tip60 HAT complex, NuA4/Tip60-HAT complex A, DMAP1-associated complex, p400-associated complex, NuA4/Tip60 HAT complex, NuA4/Tip60 HAT complex	21|17	38	19	2	1|5|7|5|7|4|4|1|2|3|4|2|1|1|2|2|2|0|2|2|2|2|1|2|0|0|7|15|1|0|1|9|0|0|1|1|0|1|0|0|13|10|3|1	0.95
ELK3	P41970	ENSG00000111145	Ets	Q8TE76	MORC4	MORC family CW-type zinc finger protein 4 (Zinc finger CW-type coiled-coil domain protein 2) (Zinc finger CW-type domain protein 4)	28		7|8	15	7.5	2	0|0|0|0|0|0|0|0|0|0|0|0|0|0|0|0|0|0|0|0|0|0|0|0|0|0|0|0|0|0|0|0|0|0|0|0|0|0|1|0|0|0|0|0	1
ELK3	P41970	ENSG00000111145	Ets	O75461	E2F6	Transcription factor E2F6 (E2F-6)	26	E2F-6 complex, MLL1-WDR5 complex	6|5	11	5.5	2	0|1|0|1|0|0|1|0|1|1|0|0|0|0|0|0|0|0|0|0|0|0|0|0|0|0|2|1|0|0|0|2|0|0|0|0|0|0|0|0|0|1|0|0	1
ELK3	P41970	ENSG00000111145	Ets	Q969R5	LMBL2	Lethal(3)malignant brain tumor-like protein 2 (H-l(3)mbt-like protein 2) (L(3)mbt-like protein 2)	25	E2F-6 complex	11|9	20	10	2	0|0|0|0|0|0|0|0|0|0|0|0|0|0|0|0|0|0|0|0|0|0|0|0|0|0|1|2|0|0|0|0|0|0|0|0|0|0|0|0|0|0|0|0	1
ELK3	P41970	ENSG00000111145	Ets	O60315	ZEB2	Zinc finger E-box-binding homeobox 2 (Smad-interacting protein 1) (SMADIP1) (Zinc finger homeobox protein 1b)	25	CtBP complex, ZEB2-KDM1A complex	4|3	7	3.5	2	0|0|0|0|0|0|0|0|0|0|0|0|0|0|0|0|0|0|0|0|0|0|0|0|0|0|0|0|0|0|0|0|0|0|0|0|0|0|0|0|0|0|0|0	0.99
ELK3	P41970	ENSG00000111145	Ets	Q9UQR1	ZN148	Zinc finger protein 148 (Transcription factor ZBP-89) (Zinc finger DNA-binding protein 89)	25		11|6	17	8.5	2	0|2|1|0|0|0|1|1|1|1|0|0|0|0|1|0|0|0|0|0|0|0|0|0|0|0|2|1|0|0|1|4|0|0|0|0|0|0|0|0|0|1|0|0	0.99
ELK3	P41970	ENSG00000111145	Ets	P85037	FOXK1	Forkhead box protein K1 (Myocyte nuclear factor) (MNF)	24		8|4	12	6	2	1|1|0|0|0|0|0|0|1|0|0|0|0|0|0|0|0|0|0|0|0|0|0|0|0|0|1|0|0|0|0|0|0|0|0|0|0|0|0|0|0|0|0|0	1	X				X	X
ELK3	P41970	ENSG00000111145	Ets	P49116	NR2C2	Nuclear receptor subfamily 2 group C member 2 (Orphan nuclear receptor TAK1) (Orphan nuclear receptor TR4) (Testicular receptor 4)	24		6|7	13	6.5	2	0|0|0|0|0|0|0|0|0|0|0|0|0|1|0|0|0|0|0|0|0|0|0|0|0|0|1|1|0|0|0|0|0|0|0|0|0|0|0|0|0|0|0|0	1
ELK3	P41970	ENSG00000111145	Ets	Q13610	PWP1	Periodic tryptophan protein 1 homolog (Keratinocyte protein IEF SSP 9502)	24	Nop56p-associated pre-rRNA complex	5|3	8	4	2	0|0|1|1|1|0|0|0|0|0|1|0|0|0|0|0|0|0|0|0|0|0|0|0|0|0|0|1|0|0|0|0|0|0|0|0|1|1|0|0|1|1|2|1	0.96
ELK3	P41970	ENSG00000111145	Ets	Q15906	VPS72	Vacuolar protein sorting-associated protein 72 homolog (Protein YL-1) (Transcription factor-like 1)	23	SRCAP-associated chromatin remodeling complex, NuA4/Tip60 HAT complex, DMAP1-associated complex	3|3	6	3	2	2|1|0|0|2|0|0|0|1|0|0|0|0|0|0|0|0|0|0|0|0|0|0|0|0|0|1|2|0|0|0|2|0|0|0|0|0|0|0|0|1|2|0|0	0.86	X				X
ELK3	P41970	ENSG00000111145	Ets	Q9Y6X8	ZHX2	Zinc fingers and homeoboxes protein 2 (Alpha-fetoprotein regulator 1) (AFP regulator 1) (Regulator of AFP) (Zinc finger and homeodomain protein 2)	23		8|7	15	7.5	2	2|3|0|0|0|0|3|0|3|3|0|0|0|0|0|0|0|0|0|0|0|0|0|0|0|0|1|1|0|0|1|1|0|0|0|0|0|0|0|0|0|0|0|0	0.99
ELK3	P41970	ENSG00000111145	Ets	Q92560	BAP1	Ubiquitin carboxyl-terminal hydrolase BAP1 (EC 3.4.19.12) (BRCA1-associated protein 1) (Cerebral protein 6)	22		4|4	8	4	2	1|1|1|2|0|0|1|0|1|0|0|0|0|0|0|1|0|0|0|0|0|0|0|0|0|0|2|3|0|0|0|0|0|0|0|0|0|0|0|0|1|1|0|0	0.96
ELK3	P41970	ENSG00000111145	Ets	Q6MZP7	LIN54	Protein lin-54 homolog (CXC domain-containing protein 1)	22	LINC complex, S-phase, LINC core complex, LINC complex, quiescent cells	13|10	23	11.5	2	8|7|4|1|2|2|4|1|9|4|0|1|0|0|0|0|1|0|0|0|0|0|0|0|0|0|11|5|1|1|9|9|1|0|2|2|1|0|0|0|7|4|0|2	0.81
ELK3	P41970	ENSG00000111145	Ets	Q96QT6	PHF12	PHD finger protein 12 (PHD factor 1) (Pf1)	22		16|15	31	15.5	2	1|0|2|0|3|1|2|0|1|0|1|3|2|0|3|1|1|0|1|1|1|1|0|0|0|0|0|5|0|0|0|3|0|0|0|0|0|0|0|0|2|3|0|0	1
ELK3	P41970	ENSG00000111145	Ets	Q7Z589	EMSY	BRCA2-interacting transcriptional repressor EMSY	21	NIF-1-DBC1-EMSY complex	15|14	29	14.5	2	3|3|6|2|4|3|4|2|3|3|0|0|0|0|4|0|3|0|2|1|2|1|1|1|0|0|10|14|0|1|2|6|1|0|1|1|0|1|0|0|6|5|2|1	0.93
ELK3	P41970	ENSG00000111145	Ets	Q8WUU5	GATD1	GATA zinc finger domain-containing protein 1 (Ocular development-associated gene protein)	21		7|4	11	5.5	2	1|3|1|2|0|1|1|1|1|1|0|0|0|0|0|0|0|0|0|0|0|0|0|0|0|0|0|0|0|0|0|2|0|0|0|1|0|0|0|0|1|2|0|1	0.97
ELK3	P41970	ENSG00000111145	Ets	P25490	TYY1	Transcriptional repressor protein YY1 (Delta transcription factor) (INO80 complex subunit S) (NF-E1) (Yin and yang 1) (YY-1)	21	Polycomb repressive complex 1 (PRC1, hPRC-H), Ku antigen-YY1-alphaMyHC promoter complex, YY1-Notch1-RBP-Jkappa complex, YY1-Notch1 complex, hs4 enhancer complex (faster migrating complex), hs4 enhancer complex (slow migrating complex), YY1-MDM2-p53 complex, EED-EZH-YY1 polycomb complex	4|4	8	4	2	1|2|0|0|2|0|1|0|0|0|0|0|0|0|0|0|0|0|0|0|0|0|0|0|0|1|0|0|0|0|2|1|0|0|0|0|0|0|0|0|0|0|0|0	0.98
ELK3	P41970	ENSG00000111145	Ets	Q15291	RBBP5	Retinoblastoma-binding protein 5 (RBBP-5) (Retinoblastoma-binding protein RBQ-3)	20	Menin-associated histone methyltransferase complex, MLL-HCF complex, ALL-1 supercomplex, WDR5-ASH2L-RBBP5-MLL2 complex, ASCOM complex, MOF complex, Set1B complex, Set1A complex, UTX-MLL2/3 complex, PTIP-HMT complex, MLL1-WDR5 complex, PITX2-MLL4-ASH2L-RBBP5-PTIP complex, MLL1 core complex, MLL2 complex, MLL3 complex, MLL1 complex, MLL4 complex, Set1A complex, Set1B complex, CUL4A-DDB1-RBBP5 compl…	9|8	17	8.5	2	6|6|6|4|9|6|5|3|4|4|2|0|0|0|1|1|4|0|0|0|1|0|0|0|0|1|2|3|0|0|4|3|0|0|0|1|0|0|0|0|2|0|0|2	0.77
ELK3	P41970	ENSG00000111145	Ets	P50219	MNX1	Motor neuron and pancreas homeobox protein 1 (Homeobox protein HB9)	19		3|2	5	2.5	2	0|0|0|0|0|0|0|0|1|0|0|0|0|0|0|0|0|0|0|0|0|0|0|0|0|0|0|0|0|0|0|0|0|0|0|0|0|0|0|0|0|0|0|0	0.97
ELK3	P41970	ENSG00000111145	Ets	P14859	PO2F1	POU domain, class 2, transcription factor 1 (NF-A1) (Octamer-binding protein 1) (Oct-1) (Octamer-binding transcription factor 1) (OTF-1)	18	OCT1-SOX2 DNA-protein complex, hs4 enhancer complex (faster migrating complex), OCT1-OBF1-DNA-TLE1 complex, OCT1-OBF1-DNA complex, OCT1-OBF1-DNA complex	4|3	7	3.5	2	0|0|0|0|0|0|0|0|0|0|0|0|0|0|0|0|0|0|0|0|0|0|0|0|0|0|0|0|0|0|0|0|0|0|0|0|0|0|0|0|0|0|0|0	0.99
ELK3	P41970	ENSG00000111145	Ets	P49848	TAF6	Transcription initiation factor TFIID subunit 6 (RNA polymerase II TBP-associated factor subunit E) (Transcription initiation factor TFIID 70 kDa subunit) (TAF(II)70) (TAFII-70) (TAFII70) (Transcription initiation factor TFIID 80 kDa subunit) (TAF(II)80) (TAFII-80) (TAFII80)	18	TFIID complex, TFTC complex (TATA-binding protein-free TAF-II-containing complex), TFTC complex (TATA-binding protein-free TAF-II-containing complex), TFTC complex (TATA-binding protein-free TAF-II-containing complex), TFTC complex (TATA-binding protein-free TAF-II-containing complex), TFTC complex (TATA-binding protein-free TAF-II-containing complex), TFIID complex, TFIID-beta complex, TFTC comp…	20|16	36	18	2	5|5|8|3|8|4|5|1|7|3|2|1|1|1|0|0|2|0|1|0|0|1|0|0|0|1|3|3|3|3|8|9|0|1|2|1|0|0|0|0|5|3|3|2	0.98
ELK3	P41970	ENSG00000111145	Ets	Q92766	RREB1	Ras-responsive element-binding protein 1 (RREB-1) (Finger protein in nuclear bodies) (Raf-responsive zinc finger protein LZ321) (Zinc finger motif enhancer-binding protein 1) (Zep-1)	16	LSD1 complex, CtBP complex	2|2	4	2	2	0|1|1|0|0|0|0|0|0|0|0|0|0|0|0|1|0|0|0|0|0|0|0|0|0|0|0|0|0|0|0|0|0|0|0|0|0|0|0|0|1|0|0|0	0.94	X				X	X
ELK3	P41970	ENSG00000111145	Ets	Q9UKY1	ZHX1	Zinc fingers and homeoboxes protein 1	16		5|5	10	5	2	1|0|0|0|0|0|2|1|1|0|0|0|0|0|0|0|0|0|0|0|0|0|0|0|0|0|0|0|0|0|0|1|0|0|0|0|0|0|0|0|0|0|0|0	1
ELK3	P41970	ENSG00000111145	Ets	Q9UMN6	KMT2B	Histone-lysine N-methyltransferase 2B (Lysine N-methyltransferase 2B) (EC 2.1.1.43) (Myeloid/lymphoid or mixed-lineage leukemia protein 4) (Trithorax homolog 2) (WW domain-binding protein 7) (WBP-7)	15	Menin-associated histone methyltransferase complex, PTIP-HMT complex	16|10	26	13	2	9|11|1|1|4|4|7|2|6|6|0|0|0|0|0|0|0|0|0|0|0|0|0|0|0|1|5|6|0|0|3|7|0|0|0|0|0|0|0|0|0|0|0|0	0.9
ELK3	P41970	ENSG00000111145	Ets	Q06546	GABPA	GA-binding protein alpha chain (GABP subunit alpha) (Nuclear respiratory factor 2 subunit alpha) (Transcription factor E4TF1-60)	14		7|9	16	8	2	2|1|1|2|1|0|2|0|1|0|0|0|0|0|2|0|0|0|0|0|0|0|0|0|0|0|0|0|1|0|0|5|0|0|0|0|0|0|0|0|2|1|0|0	0.99	X				X
ELK3	P41970	ENSG00000111145	Ets	Q9UI36	DACH1	Dachshund homolog 1 (Dach1)	14		2|2	4	2	2	0|0|0|0|0|0|0|0|0|0|0|0|0|0|0|0|0|0|0|0|0|0|0|0|0|1|0|2|0|2|0|0|0|0|0|0|0|0|0|0|1|1|0|0	0.86
ELK3	P41970	ENSG00000111145	Ets	Q9HAV7	GRPE1	GrpE protein homolog 1, mitochondrial (HMGE) (Mt-GrpE#1)	14		2|3	5	2.5	2	0|0|1|1|3|1|1|0|0|0|0|0|0|1|0|0|0|0|0|1|0|1|1|0|0|0|0|0|0|0|0|0|0|1|0|0|0|0|0|0|0|0|0|1	0.79
ELK3	P41970	ENSG00000111145	Ets	Q00059	TFAM	Transcription factor A, mitochondrial (mtTFA) (Mitochondrial transcription factor 1) (MtTF1) (Transcription factor 6) (TCF-6) (Transcription factor 6-like 2)	14		4|3	7	3.5	2	0|0|4|0|2|0|0|0|1|0|0|1|2|1|0|0|0|0|0|1|0|0|0|0|0|0|0|0|0|0|0|0|0|0|0|0|0|0|0|0|0|0|0|0	0.9
ELK3	P41970	ENSG00000111145	Ets	O75362	ZN217	Zinc finger protein 217	14	CoREST-HDAC complex, LSD1 complex, anti-BHC110 complex, CtBP complex, BHC110 complex	5|5	10	5	2	0|1|0|0|0|0|0|0|0|0|0|1|1|1|0|0|0|0|0|0|0|0|0|0|0|0|0|0|0|0|0|0|0|0|0|0|0|0|0|0|0|0|0|0	1
ELK3	P41970	ENSG00000111145	Ets	Q7Z5L9	I2BP2	Interferon regulatory factor 2-binding protein 2 (IRF-2-binding protein 2) (IRF-2BP2)	13	IRF2BP2-IRF2BP1-IRF2BPL complex	14|13	27	13.5	2	15|14|7|3|4|0|10|3|9|9|1|1|2|2|0|1|0|0|0|0|1|1|0|0|1|1|4|4|1|5|9|9|0|0|0|0|0|0|0|0|5|3|0|1	0.81
ELK3	P41970	ENSG00000111145	Ets	Q9BYE7	PCGF6	Polycomb group RING finger protein 6 (Mel18 and Bmi1-like RING finger) (RING finger protein 134)	13	E2F-6 complex	5|3	8	4	2	2|0|1|1|1|1|0|0|0|0|1|1|0|0|0|0|0|0|0|0|0|0|0|0|0|0|3|2|0|0|1|2|0|0|1|0|0|1|0|0|0|0|0|0	0.89
ELK3	P41970	ENSG00000111145	Ets	Q9BY77	PDIP3	Polymerase delta-interacting protein 3 (46 kDa DNA polymerase delta interaction protein) (p46) (S6K1 Aly/REF-like target) (SKAR)	13		5|4	9	4.5	2	0|0|0|0|0|0|0|0|0|0|0|0|0|0|1|0|0|0|1|1|0|1|0|0|0|0|0|2|0|0|0|0|0|0|0|0|0|0|0|0|0|0|0|0	1
ELK3	P41970	ENSG00000111145	Ets	O15047	SET1A	Histone-lysine N-methyltransferase SETD1A (EC 2.1.1.43) (Lysine N-methyltransferase 2F) (SET domain-containing protein 1A) (hSET1A) (Set1/Ash2 histone methyltransferase complex subunit SET1)	13	MOF complex, HCF-1 complex, Set1A complex, Set1A complex	16|11	27	13.5	2	11|11|9|4|7|5|4|3|7|3|2|1|1|1|0|0|0|0|0|1|1|1|0|0|1|0|7|3|2|0|7|5|0|0|0|1|0|1|0|0|4|4|1|0	0.86
ELK3	P41970	ENSG00000111145	Ets	A6NHR9	SMHD1	Structural maintenance of chromosomes flexible hinge domain-containing protein 1 (SMC hinge domain-containing protein 1)	13		15|16	31	15.5	2	9|8|7|6|7|8|8|3|4|3|1|1|1|1|0|0|0|0|0|0|0|0|0|0|0|0|7|5|2|1|13|13|0|0|1|1|1|0|0|0|10|10|5|5	0.85
ELK3	P41970	ENSG00000111145	Ets	P05141	ADT2	ADP/ATP translocase 2 (ADP,ATP carrier protein 2) (ADP,ATP carrier protein, fibroblast isoform) (Adenine nucleotide translocator 2) (ANT 2) (Solute carrier family 25 member 5) [Cleaved into: ADP/ATP translocase 2, N-terminally processed]	12	Nop56p-associated pre-rRNA complex, prohibitin 2 complex, mitochondrial	3|4	7	3.5	2	0|0|1|0|2|1|2|0|1|0|0|0|0|0|0|0|0|0|0|0|0|0|0|0|0|0|0|0|0|0|0|0|0|0|0|0|0|0|0|0|0|0|0|2	0.95
ELK3	P41970	ENSG00000111145	Ets	Q7L2E3	DHX30	Putative ATP-dependent RNA helicase DHX30 (EC 3.6.4.13) (DEAH box protein 30)	12	H2AX complex I, protein complex (DDX28; DHX30; GRSF1; FASTKD2; FASTKD5)	8|3	11	5.5	2	1|0|3|1|2|1|0|0|0|1|1|0|0|0|1|0|0|0|0|0|0|1|0|0|0|0|0|0|0|0|0|0|0|0|0|0|0|0|0|3|2|0|5|6	0.78
ELK3	P41970	ENSG00000111145	Ets	Q8IU81	I2BP1	Interferon regulatory factor 2-binding protein 1 (IRF-2-binding protein 1) (IRF-2BP1) (Probable E3 ubiquitin-protein ligase IRF2BP1) (EC 2.3.2.27) (Probable RING-type E3 ubiquitin transferase IRF2BP1)	12	IRF2BP2-IRF2BP1-IRF2BPL complex	2|3	5	2.5	2	4|2|0|0|1|0|1|2|1|1|0|0|0|0|0|0|0|0|0|0|0|0|0|0|0|0|0|1|0|0|0|0|0|0|0|0|0|0|0|0|0|0|0|0	0.76
ELK3	P41970	ENSG00000111145	Ets	Q5VWG9	TAF3	Transcription initiation factor TFIID subunit 3 (140 kDa TATA box-binding protein-associated factor) (TBP-associated factor 3) (Transcription initiation factor TFIID 140 kDa subunit) (TAF(II)140) (TAF140) (TAFII-140) (TAFII140)	12	DA complex, DAB complex	2|3	5	2.5	2	1|1|0|1|1|0|0|0|0|0|0|0|0|0|0|0|0|0|0|1|0|0|0|0|0|0|2|3|0|0|1|1|0|0|0|0|0|0|0|0|1|1|0|0	0.76
ELK3	P41970	ENSG00000111145	Ets	O00268	TAF4	Transcription initiation factor TFIID subunit 4 (RNA polymerase II TBP-associated factor subunit C) (TBP-associated factor 4) (Transcription initiation factor TFIID 130 kDa subunit) (TAF(II)130) (TAFII-130) (TAFII130) (Transcription initiation factor TFIID 135 kDa subunit) (TAF(II)135) (TAFII-135) (TAFII135)	12	TFIID complex, TFTC complex (TATA-binding protein-free TAF-II-containing complex), TFTC complex (TATA-binding protein-free TAF-II-containing complex), TFTC complex (TATA-binding protein-free TAF-II-containing complex), TFTC complex (TATA-binding protein-free TAF-II-containing complex), TFTC complex (TATA-binding protein-free TAF-II-containing complex), TFIID complex, TFIID-beta complex, TFTC comp…	8|14	22	11	2	1|3|8|4|12|7|2|1|1|0|1|0|0|0|0|0|0|0|0|0|0|1|0|0|0|0|10|11|0|0|4|6|0|0|1|0|0|0|0|0|5|2|0|1	0.81
ELK3	P41970	ENSG00000111145	Ets	Q15542	TAF5	Transcription initiation factor TFIID subunit 5 (Transcription initiation factor TFIID 100 kDa subunit) (TAF(II)100) (TAFII-100) (TAFII100)	12	TFIID complex, TFTC complex (TATA-binding protein-free TAF-II-containing complex), TFTC complex (TATA-binding protein-free TAF-II-containing complex), TFTC complex (TATA-binding protein-free TAF-II-containing complex), TFTC complex (TATA-binding protein-free TAF-II-containing complex), TFTC complex (TATA-binding protein-free TAF-II-containing complex), TFIID complex, TFIID-beta complex, TFTC comp…	17|14	31	15.5	2	6|7|10|6|8|4|4|2|5|2|1|0|1|0|0|0|0|0|0|0|0|0|0|0|0|0|1|4|0|0|5|4|0|0|0|1|0|1|0|0|2|3|0|1	0.96
ELK3	P41970	ENSG00000111145	Ets	P52739	ZN131	Zinc finger protein 131	12		16|17	33	16.5	2	4|4|11|2|9|3|4|2|5|2|2|2|2|2|1|2|1|0|0|0|0|0|1|0|1|1|0|3|2|0|6|6|0|0|1|0|0|0|0|0|3|0|0|0	0.98
ELK3	P41970	ENSG00000111145	Ets	O75925	PIAS1	E3 SUMO-protein ligase PIAS1 (EC 2.3.2.-) (DEAD/H box-binding protein 1) (E3 SUMO-protein transferase PIAS1) (Gu-binding protein) (GBP) (Protein inhibitor of activated STAT protein 1) (RNA helicase II-binding protein)	11		3|2	5	2.5	2	0|0|0|0|0|0|0|0|0|0|0|0|0|0|0|0|0|0|0|0|0|0|0|0|0|0|0|0|0|0|0|0|0|0|0|0|0|0|0|0|0|0|0|0	0.97	X			X	X	X
ELK3	P41970	ENSG00000111145	Ets	Q8TD26	CHD6	Chromodomain-helicase-DNA-binding protein 6 (CHD-6) (EC 3.6.4.12) (ATP-dependent helicase CHD6) (Radiation-induced gene B protein)	11		15|10	25	12.5	2	0|0|0|0|0|0|0|0|0|0|1|0|0|0|0|0|0|0|0|0|0|0|0|0|0|0|0|0|0|0|0|0|0|0|0|0|0|0|0|0|0|0|0|0	1
ELK3	P41970	ENSG00000111145	Ets	Q9H160	ING2	Inhibitor of growth protein 2 (Inhibitor of growth 1-like protein) (ING1Lp) (p32) (p33ING2)	10	ING2 complex	2|2	4	2	2	0|0|0|0|0|0|0|0|0|0|0|0|0|0|0|0|0|0|0|0|0|0|0|0|0|0|1|1|0|0|0|0|0|0|0|0|0|0|0|0|0|0|0|0	0.94
ELK3	P41970	ENSG00000111145	Ets	Q9H0E9	BRD8	Bromodomain-containing protein 8 (Skeletal muscle abundant protein) (Skeletal muscle abundant protein 2) (Thyroid hormone receptor coactivating protein of 120 kDa) (TrCP120) (p120)	9	NuA4/Tip60 HAT complex, NuA4/Tip60 HAT complex, NuA4/Tip60-HAT complex A, DMAP1-associated complex, NuA4/Tip60 HAT complex, NuA4/Tip60 HAT complex	6|6	12	6	2	2|4|1|2|4|3|2|1|3|2|2|0|0|0|1|1|1|0|0|0|0|0|0|0|0|0|4|5|1|0|2|4|0|0|0|0|0|1|0|0|2|3|2|0	0.8
ELK3	P41970	ENSG00000111145	Ets	Q96DT7	ZBT10	Zinc finger and BTB domain-containing protein 10 (Zinc finger protein RIN ZF)	9		2|4	6	3	2	0|0|0|1|1|0|0|0|0|0|0|0|0|0|0|0|0|0|0|0|0|0|0|0|0|0|1|0|0|0|0|0|0|0|0|0|0|0|0|0|0|0|0|0	0.97
ELK3	P41970	ENSG00000111145	Ets	O43829	ZBT14	Zinc finger and BTB domain-containing protein 14 (Zinc finger protein 161 homolog) (Zfp-161) (Zinc finger protein 478) (Zinc finger protein 5 homolog) (ZF5) (Zfp-5) (hZF5)	9		3|2	5	2.5	2	0|1|0|0|1|0|0|0|0|0|0|0|0|0|0|0|0|0|0|0|0|0|0|0|0|0|0|0|0|0|0|1|0|0|0|0|0|0|0|0|0|0|0|0	0.97
ELK3	P41970	ENSG00000111145	Ets	Q6NUN9	ZN746	Zinc finger protein 746 (Parkin-interacting substrate) (PARIS)	9		2|3	5	2.5	2	0|0|0|0|0|0|0|0|0|0|0|0|1|0|0|0|0|0|0|0|0|0|0|0|0|0|0|0|0|0|0|0|0|0|0|0|0|0|0|0|0|0|0|0	0.97
ELK3	P41970	ENSG00000111145	Ets	Q9UKD1	GMEB2	Glucocorticoid modulatory element-binding protein 2 (GMEB-2) (DNA-binding protein p79PIF) (Parvovirus initiation factor p79) (PIF p79)	8		5|3	8	4	2	2|4|0|0|1|0|0|1|1|1|0|0|0|0|0|0|0|0|0|0|0|0|0|0|0|0|1|1|0|0|0|1|0|0|0|0|0|0|0|0|0|0|0|0	0.91
ELK3	P41970	ENSG00000111145	Ets	Q96EZ8	MCRS1	Microspherule protein 1 (58 kDa microspherule protein) (Cell cycle-regulated factor p78) (INO80 complex subunit J) (MCRS2)	8	INO80 chromatin remodeling complex, DIPA-MCRS1 complex, MLL1-WDR5 complex, MSP58-RINT1 complex	2|2	4	2	2	0|1|0|0|0|0|2|0|2|1|0|0|0|0|0|0|0|0|0|0|0|0|0|0|0|0|2|0|0|0|0|0|0|0|0|0|0|0|0|0|0|0|0|0	0.82
ELK3	P41970	ENSG00000111145	Ets	Q8NEM7	SP20H	Transcription factor SPT20 homolog (p38-interacting protein) (p38IP)	8	SAGA complex, GCN5-linked, STAGA complex, SPT3-linked	3|2	5	2.5	2	1|1|0|0|1|1|0|0|0|0|0|0|0|0|0|0|0|0|0|0|0|0|0|0|0|0|0|0|0|0|1|2|0|0|0|0|0|0|0|0|2|0|0|0	0.85
ELK3	P41970	ENSG00000111145	Ets	O75928	PIAS2	E3 SUMO-protein ligase PIAS2 (EC 2.3.2.-) (Androgen receptor-interacting protein 3) (ARIP3) (DAB2-interacting protein) (DIP) (E3 SUMO-protein transferase PIAS2) (Msx-interacting zinc finger protein) (Miz1) (PIAS-NY protein) (Protein inhibitor of activated STAT x) (Protein inhibitor of activated STAT2)	7		3|2	5	2.5	2	2|0|0|0|0|0|1|0|0|0|0|0|0|0|0|0|0|0|0|0|0|0|0|0|0|0|0|1|0|0|0|1|0|0|0|0|0|0|0|0|0|0|0|0	0.95	X				X
ELK3	P41970	ENSG00000111145	Ets	P54198	HIRA	Protein HIRA (TUP1-like enhancer of split protein 1)	7	Histone H3.3 complex, ASF1-interacting protein complex	3|3	6	3	2	0|0|0|0|0|0|0|0|0|0|0|0|0|0|0|0|0|0|0|0|0|0|0|0|0|0|1|0|0|0|0|1|0|0|0|0|0|0|0|0|0|0|0|0	0.99
ELK3	P41970	ENSG00000111145	Ets	Q03112	MECOM	MDS1 and EVI1 complex locus protein (Ecotropic virus integration site 1 protein homolog) (EVI-1) (Myelodysplasia syndrome 1 protein) (Myelodysplasia syndrome-associated protein 1)	7		9|7	16	8	2	0|0|0|0|0|0|0|0|0|0|0|0|0|0|0|0|0|0|0|0|0|0|0|0|0|0|0|0|0|0|0|0|0|0|0|0|0|0|0|0|0|0|0|0	1
ELK3	P41970	ENSG00000111145	Ets	Q6P1X5	TAF2	Transcription initiation factor TFIID subunit 2 (150 kDa cofactor of initiator function) (RNA polymerase II TBP-associated factor subunit B) (TBP-associated factor 150 kDa) (Transcription initiation factor TFIID 150 kDa subunit) (TAF(II)150) (TAFII-150) (TAFII150)	7	TFIID complex, TFTC complex (TATA-binding protein-free TAF-II-containing complex), TFTC complex (TATA-binding protein-free TAF-II-containing complex), TFTC complex (TATA-binding protein-free TAF-II-containing complex), TFTC complex (TATA-binding protein-free TAF-II-containing complex), TFTC complex (TATA-binding protein-free TAF-II-containing complex), TFIID-beta complex, TFTC complex (TATA-bindi…	5|4	9	4.5	2	0|0|1|2|1|1|1|0|0|0|0|0|0|0|0|0|0|0|0|0|0|0|0|0|0|0|0|0|0|0|0|0|0|0|0|0|0|0|0|0|0|0|0|0	1
ELK3	P41970	ENSG00000111145	Ets	Q9H9F9	ARP5	Actin-related protein 5 (hARP5) (Sarcoma antigen NY-SAR-16)	6	INO80 chromatin remodeling complex	3|3	6	3	2	0|0|0|0|1|1|0|0|0|1|0|0|0|0|0|0|0|0|0|0|0|0|0|0|0|0|0|0|0|0|0|0|0|0|0|0|0|0|0|0|0|0|0|0	0.99
ELK3	P41970	ENSG00000111145	Ets	Q9NQP4	PFD4	Prefoldin subunit 4 (Protein C-1)	6	Prefoldin complex, Prefoldin complex, CCT:PFD complex, CCT:PFD complex, testis specific	2|2	4	2	2	0|0|0|0|0|0|0|0|0|0|0|0|0|0|1|1|0|0|0|0|0|0|0|0|0|0|0|0|1|1|0|0|2|2|0|0|0|0|0|0|0|0|0|1	0.77
ELK3	P41970	ENSG00000111145	Ets	P61956	SUMO2	Small ubiquitin-related modifier 2 (SUMO-2) (HSMT3) (SMT3 homolog 2) (SUMO-3) (Sentrin-2) (Ubiquitin-like protein SMT3B) (Smt3B)	6		2|4	6	3	2	0|1|3|0|0|0|1|0|1|0|0|0|1|1|1|1|1|0|0|0|0|0|0|0|0|0|0|0|0|0|1|1|0|0|0|0|0|0|0|0|0|0|0|0	0.82
ELK3	P41970	ENSG00000111145	Ets	P21675	TAF1	Transcription initiation factor TFIID subunit 1 (EC 2.3.1.48) (EC 2.7.11.1) (Cell cycle gene 1 protein) (TBP-associated factor 250 kDa) (p250) (Transcription initiation factor TFIID 250 kDa subunit) (TAF(II)250) (TAFII-250) (TAFII250)	6	TFIID complex, TFIID complex, TFIID-beta complex, TFIID complex, TFIID complex, B-cell specific, DA complex, DAB complex, TFIID complex, TFIID complex, TFIID-beta complex, ALL-1 supercomplex, Transcription initiation factor complex (TAF1, TAF5, TAF11, TAF12, TBP), MOF complex, TFIID complex, MLL1-WDR5 complex	7|8	15	7.5	2	6|3|0|4|5|4|4|3|3|3|0|0|0|0|0|0|0|0|0|0|0|0|0|0|0|0|3|5|0|0|0|3|0|0|0|0|0|0|0|0|0|4|0|0	0.85
ELK3	P41970	ENSG00000111145	Ets	Q13363	CTBP1	C-terminal-binding protein 1 (CtBP1) (EC 1.1.1.-)	5	LSD1 complex, CtBP complex, CtBP core complex, BRCA1-CtIP-CtBP complex, SHARP-CtBP complex, SHARP-CtBP1-CtIP complex, SHARP-CtBP1-CtIP-RBP-Jkappa corepressor complex	2|2	4	2	2	1|2|0|0|0|1|0|1|1|0|0|0|0|0|0|0|0|0|0|0|0|0|0|0|0|0|0|0|0|0|0|0|0|0|0|0|0|0|0|0|0|0|0|0	0.9	X			X	X	X
ELK3	P41970	ENSG00000111145	Ets	Q5H9F3	BCORL	BCL-6 corepressor-like protein 1 (BCoR-L1) (BCoR-like protein 1)	5		4|3	7	3.5	2	0|0|0|0|0|0|0|0|0|0|0|0|0|0|0|0|0|0|0|0|0|0|0|0|0|0|0|0|0|0|0|0|0|0|0|0|0|0|0|0|0|0|0|0	0.99
ELK3	P41970	ENSG00000111145	Ets	P25440	BRD2	Bromodomain-containing protein 2 (O27.1.1) (Really interesting new gene 3 protein)	5		3|2	5	2.5	2	0|0|0|0|0|0|0|0|0|0|0|0|0|0|0|0|0|0|0|0|0|0|0|0|0|0|0|0|0|0|0|0|0|0|0|0|0|0|0|0|0|0|0|0	0.97
ELK3	P41970	ENSG00000111145	Ets	Q9UBU8	MO4L1	Mortality factor 4-like protein 1 (MORF-related gene 15 protein) (Protein MSL3-1) (Transcription factor-like protein MRG15)	5	NuA4/Tip60 HAT complex, NuA4/Tip60 HAT complex, MRG15-PAM14-RB complex, MRG15-PAM14-RB complex, MAF2 complex, NuA4/Tip60-HAT complex B, NuA4/Tip60-HAT complex A, NuA4/Tip60 HAT complex, NuA4/Tip60 HAT complex	3|3	6	3	2	1|2|0|0|0|0|1|1|2|2|0|0|0|0|0|0|0|0|0|0|0|0|0|0|0|0|0|0|0|0|0|0|0|0|0|0|0|0|0|0|0|0|0|1	0.92
ELK3	P41970	ENSG00000111145	Ets	Q99729	ROAA	Heterogeneous nuclear ribonucleoprotein A/B (hnRNP A/B) (APOBEC1-binding protein 1) (ABBP-1)	5		3|4	7	3.5	2	2|1|2|1|1|1|2|1|3|1|0|0|0|0|0|0|0|0|0|0|0|0|0|0|0|0|0|0|0|0|0|0|0|0|0|0|0|0|0|0|0|0|0|0	0.89
ELK3	P41970	ENSG00000111145	Ets	Q9HAF1	EAF6	Chromatin modification-related protein MEAF6 (MYST/Esa1-associated factor 6) (Esa1-associated factor 6 homolog) (Protein EAF6 homolog) (hEAF6) (Sarcoma antigen NY-SAR-91)	4	NuA4/Tip60 HAT complex, NuA4/Tip60 HAT complex, NuA4/Tip60-HAT complex A, ING4 complex (ING4, MYST2, C1orf149, PHF17), ING4 complex (ING4, MYST2, C1orf149, PHF15), ING4 complex (ING4, MYST2, C1orf149, PHF16), NuA4/Tip60 HAT complex, HBO1 complex, ING5 complex	2|2	4	2	2	0|0|0|0|0|0|0|0|0|0|0|0|0|0|0|0|0|0|0|0|0|0|0|0|0|0|0|0|0|0|0|0|0|0|0|0|0|0|0|0|0|0|0|0	0.94
ELK3	P41970	ENSG00000111145	Ets	Q9UPP1	PHF8	Histone lysine demethylase PHF8 (EC 1.14.11.27) (PHD finger protein 8)	4		4|4	8	4	2	0|0|0|0|0|0|0|0|0|0|0|0|0|0|0|0|0|0|0|0|0|0|0|0|0|0|0|0|0|0|0|0|0|0|0|0|0|0|0|0|0|0|0|0	1
ELK3	P41970	ENSG00000111145	Ets	Q9HAZ2	PRD16	PR domain zinc finger protein 16 (PR domain-containing protein 16) (Transcription factor MEL1) (MDS1/EVI1-like gene 1)	4		6|5	11	5.5	2	0|0|0|0|0|0|0|0|0|0|0|0|0|0|0|0|0|0|0|0|0|0|0|0|0|0|0|0|0|0|0|0|0|0|0|0|0|0|0|0|0|0|0|0	1
ELK3	P41970	ENSG00000111145	Ets	Q02086	SP2	Transcription factor Sp2	4		5|2	7	3.5	2	0|0|0|0|0|0|0|0|0|0|0|0|0|0|0|0|0|0|0|0|0|0|0|0|0|0|0|0|0|0|0|0|0|0|0|0|0|0|0|0|0|0|0|0	0.97
ELK3	P41970	ENSG00000111145	Ets	Q9Y5K5	UCHL5	Ubiquitin carboxyl-terminal hydrolase isozyme L5 (UCH-L5) (EC 3.4.19.12) (Ubiquitin C-terminal hydrolase UCH37) (Ubiquitin thioesterase L5)	3		2|2	4	2	2	0|0|0|0|0|0|0|0|0|0|0|0|0|0|0|0|0|0|0|0|0|0|0|0|0|0|0|0|0|0|0|0|0|0|0|0|0|0|0|0|0|0|0|0	0.94
ELK3	P41970	ENSG00000111145	Ets	Q32P51	RA1L2	Heterogeneous nuclear ribonucleoprotein A1-like 2 (hnRNP A1-like 2) (hnRNP core protein A1-like 2)	2		5|3	8	4	2	0|3|0|4|0|0|0|0|0|3|0|0|0|0|0|0|2|0|1|1|0|0|0|0|0|0|0|0|0|0|0|0|1|2|0|2|0|0|0|0|0|0|0|0	0.83
ELK3	P41970	ENSG00000111145	Ets	Q14119	VEZF1	Vascular endothelial zinc finger 1 (Putative transcription factor DB1) (Zinc finger protein 161)	2		6|3	9	4.5	2	0|0|0|0|0|0|0|0|0|0|0|0|0|0|0|0|0|0|0|0|0|0|0|0|0|0|0|0|0|0|0|0|0|0|0|0|0|0|0|0|0|0|0|0	0.99
ELK3	P41970	ENSG00000111145	Ets	P41970	ELK3	ETS domain-containing protein Elk-3 (ETS-related protein ERP) (ETS-related protein NET) (Serum response factor accessory protein 2) (SAP-2) (SRF accessory protein 2)	1	ELK1-SRF-ELK3 complex	25|19	44	22	2	0|0|0|0|0|0|0|0|0|0|0|0|0|0|0|0|0|0|0|0|0|0|0|0|0|0|0|0|0|0|0|0|0|0|0|0|0|0|0|0|0|0|0|0	1
ELK4	P28324	ENSG00000158711	Ets	Q9HAV7	GRPE1	GrpE protein homolog 1, mitochondrial (HMGE) (Mt-GrpE#1)	14		4|9	13	6.5	2	0|0|1|1|3|1|1|0|0|0|0|0|0|1|0|0|0|0|0|1|0|1|1|0|0|0|0|0|0|0|0|0|0|1|0|0|0|0|0|0|0|0|0|1	0.99
ELK4	P28324	ENSG00000158711	Ets	P02769	ALBU_BOVIN	Serum albumin (BSA) (allergen Bos d 6)	11		5|6	11	5.5	2	0|0|0|0|0|0|0|0|0|0|0|0|4|3|0|0|0|0|0|0|0|0|0|1|0|0|0|0|0|3|0|0|0|0|0|0|0|0|0|0|0|0|0|0	0.97
ELK4	P28324	ENSG00000158711	Ets	P28324	ELK4	ETS domain-containing protein Elk-4 (Serum response factor accessory protein 1) (SAP-1) (SRF accessory protein 1)	1	ELK1-SRF-ELK4 complex, ELK1-SAP1a-SRF complex, ELK1-SAP1a-EWS-FLI-FLI complex	4|8	12	6	2	0|0|0|0|0|0|0|0|0|0|0|0|0|0|0|0|0|0|0|0|0|0|0|0|0|0|0|0|0|0|0|0|0|0|0|0|0|0|0|0|0|0|0|0	1
ERG	P11308	ENSG00000157554	Ets	Q8NHM5	KDM2B	Lysine-specific demethylase 2B (EC 1.14.11.27) (CXXC-type zinc finger protein 2) (F-box and leucine-rich repeat protein 10) (F-box protein FBL10) (F-box/LRR-repeat protein 10) (JmjC domain-containing histone demethylation protein 1B) (Jumonji domain-containing EMSY-interactor methyltransferase motif protein) (Protein JEMMA) (Protein-containing CXXC domain 2) ([Histone-H3]-lysine-36 demethylase 1B)	62	BCOR complex	34|28	62	31	2	1|3|1|0|4|2|2|2|4|2|0|0|0|0|0|0|1|0|0|1|1|0|0|0|0|0|5|5|0|0|0|0|0|0|0|0|0|0|0|0|2|1|0|0	1
ERG	P11308	ENSG00000157554	Ets	O14686	KMT2D	Histone-lysine N-methyltransferase 2D (Lysine N-methyltransferase 2D) (EC 2.1.1.43) (ALL1-related protein) (Myeloid/lymphoid or mixed-lineage leukemia protein 2)	58	WDR5-ASH2L-RBBP5-MLL2 complex, ASCOM complex, MOF complex, UTX-MLL2/3 complex, PITX2-MLL4-ASH2L-RBBP5-PTIP complex, MLL2 complex, MLL4 complex	85|87	172	86	2	4|2|6|6|7|3|1|1|3|3|1|1|2|1|0|0|0|0|0|0|1|1|0|1|0|0|7|12|1|0|7|9|0|0|0|1|0|2|0|0|4|6|0|0	1
ERG	P11308	ENSG00000157554	Ets	Q12857	NFIA	Nuclear factor 1 A-type (NF1-A) (Nuclear factor 1/A) (CCAAT-box-binding transcription factor) (CTF) (Nuclear factor I/A) (NF-I/A) (NFI-A) (TGGCA-binding protein)	54		11|11	22	11	2	4|2|3|0|0|0|3|0|3|0|0|0|1|0|0|0|0|0|0|0|0|0|0|0|0|0|1|0|0|3|3|0|0|0|0|0|0|0|0|0|0|1|0|0	1	X				X
ERG	P11308	ENSG00000157554	Ets	O15550	KDM6A	Lysine-specific demethylase 6A (EC 1.14.11.-) (Histone demethylase UTX) (Ubiquitously-transcribed TPR protein on the X chromosome) (Ubiquitously-transcribed X chromosome tetratricopeptide repeat protein)	53	UTX-MLL2/3 complex, PTIP-HMT complex, MLL3 complex, MLL4 complex	31|25	56	28	2	3|1|3|0|4|0|2|1|1|1|0|0|0|0|0|0|0|0|0|0|0|0|0|0|0|0|0|0|0|0|2|3|0|0|0|0|0|0|0|0|2|1|0|0	1
ERG	P11308	ENSG00000157554	Ets	Q04724	TLE1	Transducin-like enhancer protein 1 (E(Sp1) homolog) (Enhancer of split groucho-like protein 1) (ESG1)	53	TLE1 corepressor complex (MASH1 promoter-corepressor complex), OCT1-OBF1-DNA-TLE1 complex, TLE1-TLE2 complex, TLE1 homodimer complex, TLE-Histone H3 complex, Hes1-TLE1 complex, TLE1 corepressor complex (MASH1 promoter-corepressor complex), NK-3-Groucho-HIPK2-SIN3A-RbpA48-HDAC1 complex, NK-3-Groucho complex, HESX1-TLE1 complex, CUL4B-DDB1-TLE1 complex, TBX20-TLE1 repressor complex	12|6	18	9	2	7|6|4|0|4|0|8|0|9|5|0|0|0|0|0|0|0|0|0|0|0|0|0|0|0|0|1|1|0|0|1|1|0|0|0|0|0|0|0|0|0|0|0|0	0.86
ERG	P11308	ENSG00000157554	Ets	Q96RK0	CIC	Protein capicua homolog	52		27|24	51	25.5	2	13|9|7|5|9|4|13|3|10|7|1|0|0|0|2|1|0|1|0|0|0|0|0|1|0|2|13|15|2|1|5|5|0|0|3|2|0|2|0|0|8|3|1|0	0.97
ERG	P11308	ENSG00000157554	Ets	P15822	ZEP1	Zinc finger protein 40 (Cirhin interaction protein) (CIRIP) (Gate keeper of apoptosis-activating protein) (GAAP) (Human immunodeficiency virus type I enhancer-binding protein 1) (HIV-EP1) (Major histocompatibility complex-binding protein 1) (MBP-1) (Positive regulatory domain II-binding factor 1) (PRDII-BF1)	52		16|7	23	11.5	2	1|1|1|1|0|2|2|0|1|1|0|0|0|0|0|0|0|0|0|0|0|0|0|2|0|0|1|1|0|0|1|2|0|0|0|0|0|0|0|0|1|0|0|0	1
ERG	P11308	ENSG00000157554	Ets	Q9UHF7	TRPS1	Zinc finger transcription factor Trps1 (Tricho-rhino-phalangeal syndrome type I protein) (Zinc finger protein GC79)	50		16|13	29	14.5	2	0|0|3|0|1|0|0|0|0|0|0|1|0|1|0|0|0|0|0|0|0|0|0|0|0|0|6|7|0|1|2|4|0|0|0|0|0|0|0|0|0|0|0|0	0.99
ERG	P11308	ENSG00000157554	Ets	O15014	ZN609	Zinc finger protein 609	50		23|17	40	20	2	6|4|3|2|5|0|9|1|7|3|0|0|0|0|0|0|0|0|0|0|0|0|0|0|1|2|4|7|2|1|10|9|0|0|1|1|1|0|0|0|2|0|0|2	0.98
ERG	P11308	ENSG00000157554	Ets	Q6W2J9	BCOR	BCL-6 corepressor (BCoR)	48	BCOR complex	83|71	154	77	2	32|31|21|10|29|12|29|11|29|18|11|7|10|7|3|4|7|2|3|3|1|4|0|1|0|4|40|35|7|8|16|31|1|3|6|5|5|7|0|0|20|16|4|5	0.99
ERG	P11308	ENSG00000157554	Ets	Q9Y618	NCOR2	Nuclear receptor corepressor 2 (N-CoR2) (CTG repeat protein 26) (SMAP270) (Silencing mediator of retinoic acid and thyroid hormone receptor) (SMRT) (T3 receptor-associating factor) (TRAC) (Thyroid-, retinoic-acid-receptor-associated corepressor)	48	SMRT complex, NCOR-SIN3-RPD3 complex, NCOR-SIN3-HDAC1 complex, SMRT core complex, SMRT core complex, NCOR2 complex, SMRT-SKIP-CBF1 complex, CBF1-HDAC1-SMRT complex, NCOR-SIN3-HDAC-HESX1 complex, HERP1/HEY2-NCOR-SIN3A complex	62|48	110	55	2	4|6|4|2|2|1|6|2|7|5|0|0|0|0|0|0|0|0|0|0|0|0|0|0|0|0|17|9|0|0|9|6|0|0|0|0|0|0|0|0|4|3|0|0	1
ERG	P11308	ENSG00000157554	Ets	Q6ZW49	PAXI1	PAX-interacting protein 1 (PAX transactivation activation domain-interacting protein)	47	UTX-MLL2/3 complex, PTIP-HMT complex, PTIP-DNA damage response complex, PITX2-MLL4-ASH2L-RBBP5-PTIP complex, MLL3 complex, MLL4 complex	15|15	30	15	2	4|2|6|2|3|2|4|2|3|2|0|0|0|0|0|0|0|0|0|0|0|0|0|0|0|0|2|3|0|0|0|3|0|0|0|0|0|0|0|0|2|0|0|0	1
ERG	P11308	ENSG00000157554	Ets	Q4LE39	ARI4B	AT-rich interactive domain-containing protein 4B (ARID domain-containing protein 4B) (180 kDa Sin3-associated polypeptide) (Sin3-associated polypeptide p180) (Breast cancer-associated antigen BRCAA1) (Histone deacetylase complex subunit SAP180) (Retinoblastoma-binding protein 1-like 1)	46	SAP complex (Sin3-associated protein complex), SAP complex (Sin3-associated protein complex), SIN3-HDAC-SAP30-ARID4 complex, SIN3-SAP25 complex, SIN3-HDAC-SAP30-ARID4 complex, BRMS1-RBP1 complex, SIN3-HDAC-SAP30-ARID4 complex, SIN3-ING1b complex I, SIN3-ING1b complex II, SIN3-SAP25 complex	7|7	14	7	2	3|4|3|0|1|1|1|0|1|1|3|2|2|1|0|3|2|0|1|1|2|2|2|2|0|0|2|1|2|1|3|4|0|0|2|0|0|0|0|0|2|3|1|1	0.98
ERG	P11308	ENSG00000157554	Ets	P51531	SMCA2	Probable global transcription activator SNF2L2 (EC 3.6.4.-) (ATP-dependent helicase SMARCA2) (BRG1-associated factor 190B) (BAF190B) (Protein brahma homolog) (hBRM) (SNF2-alpha) (SWI/SNF-related matrix-associated actin-dependent regulator of chromatin subfamily A member 2)	46	BAF complex, SWI-SNF chromatin remodeling-related-BRCA1 complex, BAF complex, Brm-associated complex, BRM-SIN3A complex, BRM-SIN3A-HDAC complex, BRM-associated complex, WINAC complex, BAF complex, BAF complex, ALL-1 supercomplex, RNA polymerase II complex (RPB1, RAP74, CDK8, CYCC, SRB7, BAF190, BAF47), chromatin structure modifying, RNA polymerase II complex, chromatin structure modifying, RNA po…	34|36	70	35	2	19|18|19|10|23|14|19|7|20|11|2|0|0|0|0|0|0|0|0|0|0|0|0|0|0|0|0|9|0|0|0|0|0|0|0|0|0|0|0|0|14|13|0|0	0.95
ERG	P11308	ENSG00000157554	Ets	Q8NFD5	ARI1B	AT-rich interactive domain-containing protein 1B (ARID domain-containing protein 1B) (BRG1-associated factor 250b) (BAF250B) (BRG1-binding protein hELD/OSA1) (Osa homolog 2) (hOsa2) (p250R)	45	BAF complex, EBAFb complex, RSmad complex	54|44	98	49	2	12|14|5|3|10|4|9|2|9|3|0|0|0|0|0|0|1|0|0|0|0|0|0|0|1|0|12|19|0|2|4|8|0|0|1|0|0|0|0|0|1|1|0|0	1
ERG	P11308	ENSG00000157554	Ets	Q92782	DPF1	Zinc finger protein neuro-d4 (BRG1-associated factor 45B) (BAF45B) (D4, zinc and double PHD fingers family 1)	45		18|17	35	17.5	2	0|0|2|0|0|0|0|0|0|0|0|0|0|0|0|0|0|0|0|0|0|0|0|0|0|0|0|0|0|0|0|1|0|0|0|0|0|0|0|0|0|0|0|0	1
ERG	P11308	ENSG00000157554	Ets	Q92785	REQU	Zinc finger protein ubi-d4 (Apoptosis response zinc finger protein) (BRG1-associated factor 45D) (BAF45D) (D4, zinc and double PHD fingers family 2) (Protein requiem)	43	LARC complex (LCR-associated remodeling complex)	25|26	51	25.5	2	9|7|7|3|10|4|8|3|8|3|1|1|0|1|0|0|1|0|1|0|0|0|2|1|0|1|5|5|2|5|8|8|0|0|4|4|1|1|0|0|8|8|1|1	0.99
ERG	P11308	ENSG00000157554	Ets	O14497	ARI1A	AT-rich interactive domain-containing protein 1A (ARID domain-containing protein 1A) (B120) (BRG1-associated factor 250) (BAF250) (BRG1-associated factor 250a) (BAF250A) (Osa homolog 1) (hOSA1) (SWI-like protein) (SWI/SNF complex protein p270) (SWI/SNF-related, matrix-associated, actin-dependent regulator of chromatin subfamily F member 1) (hELD)	42	NUMAC complex (nucleosomal methylation activator complex), BAF complex, SWI-SNF chromatin remodeling-related-BRCA1 complex, BAF complex, BAF complex, BAF complex, p300-CBP-p270-SWI/SNF complex, p300-CBP-p270 complex, Brg1-associated complex I, Brm-associated complex, BRG1-SIN3A complex, BRM-SIN3A complex, SIN3-ING1b complex II, LARC complex (LCR-associated remodeling complex), BRG1-SIN3A-HDAC con…	125|124	249	124.5	2	23|26|17|5|20|10|15|4|18|4|3|3|2|1|1|0|2|0|0|0|0|0|1|1|1|2|30|40|5|4|20|24|1|0|7|8|4|9|0|0|19|17|3|5	1
ERG	P11308	ENSG00000157554	Ets	Q9BSM1	PCGF1	Polycomb group RING finger protein 1 (Nervous system Polycomb-1) (NSPc1) (RING finger protein 68)	42	BCOR complex	7|7	14	7	2	3|1|1|1|1|1|1|2|3|0|1|0|0|0|1|1|1|0|1|0|0|0|0|0|0|1|1|1|1|0|1|1|0|0|0|0|0|1|0|0|0|2|0|0	1
ERG	P11308	ENSG00000157554	Ets	Q9UPW6	SATB2	DNA-binding protein SATB2 (Special AT-rich sequence-binding protein 2)	42		7|6	13	6.5	2	0|5|3|2|4|2|0|0|7|3|0|0|0|0|0|0|0|0|0|0|0|0|0|0|0|2|4|2|0|0|0|0|0|0|0|0|2|1|0|0|0|3|0|0	0.85
ERG	P11308	ENSG00000157554	Ets	Q08117	AES	Amino-terminal enhancer of split (Amino enhancer of split) (Gp130-associated protein GAM) (Grg-5) (Groucho-related protein 5) (Protein ESP1) (Protein GRG)	41		8|5	13	6.5	2	0|2|2|0|1|0|0|0|0|1|0|0|0|0|0|0|0|0|0|0|0|0|0|0|0|0|2|1|0|0|2|2|0|0|1|0|0|0|0|0|0|0|0|0	0.99
ERG	P11308	ENSG00000157554	Ets	P0C7T5	ATX1L	Ataxin-1-like (Brother of ataxin-1) (Brother of ATXN1)	40		7|7	14	7	2	1|0|0|0|0|0|0|0|0|0|0|0|0|0|0|0|1|0|0|0|0|0|0|0|0|0|0|1|0|0|0|0|0|0|0|0|0|0|0|0|0|0|0|0	1
ERG	P11308	ENSG00000157554	Ets	O00512	BCL9	B-cell CLL/lymphoma 9 protein (B-cell lymphoma 9 protein) (Bcl-9) (Protein legless homolog)	40	beta-catenin-B-cell lymphoma 9 protein complex	22|15	37	18.5	2	2|5|1|0|1|0|2|0|3|2|0|0|0|0|0|0|0|0|0|0|0|0|0|0|0|0|4|2|0|0|3|2|0|0|0|0|0|0|0|0|0|0|0|0	1
ERG	P11308	ENSG00000157554	Ets	Q9P2D1	CHD7	Chromodomain-helicase-DNA-binding protein 7 (CHD-7) (EC 3.6.4.12) (ATP-dependent helicase CHD7)	40		15|15	30	15	2	0|10|0|0|0|0|14|0|10|0|0|0|0|0|0|0|0|0|0|0|0|3|0|0|0|0|11|14|0|0|5|7|0|0|0|0|0|0|0|0|7|4|0|0	0.91
ERG	P11308	ENSG00000157554	Ets	Q8NEZ4	KMT2C	Histone-lysine N-methyltransferase 2C (Lysine N-methyltransferase 2C) (EC 2.1.1.43) (Homologous to ALR protein) (Myeloid/lymphoid or mixed-lineage leukemia protein 3)	39	ASCOM complex, UTX-MLL2/3 complex, PTIP-HMT complex, MLL3 complex	25|33	58	29	2	1|0|0|0|1|1|0|0|0|1|0|0|0|0|0|0|0|0|0|0|0|0|0|0|0|0|0|1|0|0|0|0|0|0|0|0|0|0|0|0|0|0|0|0	1
ERG	P11308	ENSG00000157554	Ets	Q96GM5	SMRD1	SWI/SNF-related matrix-associated actin-dependent regulator of chromatin subfamily D member 1 (60 kDa BRG-1/Brm-associated factor subunit A) (BRG1-associated factor 60A) (BAF60A) (SWI/SNF complex 60 kDa subunit)	39	NUMAC complex (nucleosomal methylation activator complex), PBAF complex (Polybromo- and BAF containing complex), BAF complex, PBAF complex (Polybromo- and BAF containing complex), BAF complex, PBAF complex (Polybromo- and BAF containing complex), BAF complex, PBAF complex (Polybromo- and BAF containing complex), BAF complex, Brg1-associated complex I, Brm-associated complex, BRG1-SIN3A complex, B…	24|19	43	21.5	2	9|13|10|6|13|8|9|3|10|5|0|0|0|0|2|0|2|0|0|2|0|1|0|0|0|0|5|7|3|3|9|10|1|2|3|5|0|2|0|0|10|9|3|3	0.93
ERG	P11308	ENSG00000157554	Ets	O00712	NFIB	Nuclear factor 1 B-type (NF1-B) (Nuclear factor 1/B) (CCAAT-box-binding transcription factor) (CTF) (Nuclear factor I/B) (NF-I/B) (NFI-B) (TGGCA-binding protein)	38		4|3	7	3.5	2	0|0|0|0|1|1|0|0|0|0|0|0|0|0|0|0|0|0|0|0|0|0|0|0|0|0|0|0|0|0|2|1|0|0|0|0|0|0|0|0|0|0|0|0	0.99	X				X
ERG	P11308	ENSG00000157554	Ets	Q14687	GSE1	Genetic suppressor element 1	38	Anti-HDAC2 complex, anti-BHC110 complex, BHC110 complex	34|25	59	29.5	2	20|20|22|11|25|15|19|13|17|12|2|1|1|1|1|0|0|1|0|0|0|0|0|0|1|1|15|13|3|1|10|9|1|0|2|1|2|2|0|0|12|4|1|2	0.86
ERG	P11308	ENSG00000157554	Ets	Q99856	ARI3A	AT-rich interactive domain-containing protein 3A (ARID domain-containing protein 3A) (B-cell regulator of IgH transcription) (Bright) (Dead ringer-like protein 1) (E2F-binding protein 1)	37		13|16	29	14.5	2	12|11|6|6|13|11|6|5|7|6|1|1|0|0|1|0|1|0|1|1|1|1|1|2|2|1|6|5|2|1|6|4|0|0|1|2|0|0|0|0|10|5|2|0	0.81
ERG	P11308	ENSG00000157554	Ets	Q4VC05	BCL7A	B-cell CLL/lymphoma 7 protein family member A	37		8|9	17	8.5	2	2|2|0|0|0|0|0|0|0|0|0|0|0|0|0|0|0|0|0|0|0|0|0|0|0|0|0|0|0|0|0|0|0|0|0|0|1|1|0|0|1|1|0|1	1
ERG	P11308	ENSG00000157554	Ets	O75376	NCOR1	Nuclear receptor corepressor 1 (N-CoR) (N-CoR1)	37	NCOR complex, NCOR-HDAC3 complex, NCOR1 complex, NCOR2 complex, Kaiso-NCOR complex, SKI-NCOR1-SIN3A-HDAC1 complex, SMAD2-SKI-NCOR complex, SMAD3-SKI-NCOR complex, SMAD4-SKI-NCOR complex	59|51	110	55	2	16|19|24|11|26|13|20|11|22|11|4|2|5|1|8|3|1|0|1|2|3|1|1|2|1|2|30|31|4|4|16|20|0|0|5|3|2|4|0|0|26|18|3|2	0.97
ERG	P11308	ENSG00000157554	Ets	Q9ULL5	PRR12	Proline-rich protein 12	37		19|9	28	14	2	0|0|0|0|0|0|0|0|0|0|0|0|0|0|0|0|0|0|0|0|0|0|0|0|0|0|1|1|0|0|2|0|0|0|0|0|0|0|1|0|0|0|0|0	1
ERG	P11308	ENSG00000157554	Ets	Q92925	SMRD2	SWI/SNF-related matrix-associated actin-dependent regulator of chromatin subfamily D member 2 (60 kDa BRG-1/Brm-associated factor subunit B) (BRG1-associated factor 60B) (BAF60B)	37	SWI-SNF chromatin remodeling-related-BRCA1 complex, PBAF complex (Polybromo- and BAF containing complex), BAF complex, BRG1-SIN3A complex, BRM-SIN3A complex, LARC complex (LCR-associated remodeling complex), BRM-SIN3A-HDAC complex, BRM-associated complex, EBAFb complex, EBAFa complex	25|21	46	23	2	8|8|7|6|5|5|6|0|4|6|2|1|1|2|2|2|1|0|1|2|1|1|1|1|1|0|5|9|2|2|4|6|0|1|3|0|2|2|0|0|8|8|4|3	1
ERG	P11308	ENSG00000157554	Ets	Q9Y2X9	ZN281	Zinc finger protein 281 (GC-box-binding zinc finger protein 1) (Transcription factor ZBP-99) (Zinc finger DNA-binding protein 99)	37	UTX-MLL2/3 complex	19|10	29	14.5	2	8|5|3|3|4|5|4|3|6|3|0|0|0|0|0|0|1|0|0|1|1|0|0|0|0|0|8|6|0|0|4|7|0|0|0|0|1|0|0|0|3|1|0|0	0.92
ERG	P11308	ENSG00000157554	Ets	Q04726	TLE3	Transducin-like enhancer protein 3 (Enhancer of split groucho-like protein 3) (ESG3)	36	CUL4B-DDB1-TLE3 complex, TBX20-TLE3 repressor complex	25|21	46	23	2	15|13|12|10|8|6|15|10|17|12|3|0|2|2|3|2|3|0|1|2|0|0|2|1|3|1|3|3|4|4|13|8|2|0|4|1|7|6|0|0|10|6|6|7	0.88
ERG	P11308	ENSG00000157554	Ets	Q9H334	FOXP1	Forkhead box protein P1 (Mac-1-regulated forkhead) (MFH)	35		8|4	12	6	2	1|2|0|0|0|0|1|0|0|0|0|0|0|0|0|0|0|0|0|0|0|0|0|0|0|0|1|2|0|0|2|1|0|0|0|0|0|0|0|0|0|0|0|0	0.99	X				X	X
ERG	P11308	ENSG00000157554	Ets	Q09472	EP300	Histone acetyltransferase p300 (p300 HAT) (EC 2.3.1.48) (E1A-associated protein p300) (Histone butyryltransferase p300) (EC 2.3.1.-) (Histone crotonyltransferase p300) (EC 2.3.1.-) (Protein propionyltransferase p300) (EC 2.3.1.-)	35	Multisubunit ACTR coactivator complex, p300-MDM2-p53 protein complex, p300-CBP-p270-SWI/SNF complex, p300-CBP-p270 complex, p33ING1b-p300 complex, ING1-p300-PCNA complex, pRb2/p130-multimolecular complex (RB2, E2F5, HDAC1, SUV39H1, P300), p300-SMAD1-STAT3 complex, PIAS3-SMAD3-P300 complex, HES1 promoter corepressor complex, HES1 promoter-Notch enhancer complex, SMAD1-P300 complex, Smad1-Notch1-p3…	33|21	54	27	2	1|0|0|0|0|0|1|2|0|0|0|0|0|0|0|0|0|0|0|0|0|0|0|0|0|0|0|0|0|0|2|0|0|0|0|0|0|0|0|0|0|0|0|0	1	X		X
ERG	P11308	ENSG00000157554	Ets	Q9ULD9	ZN608	Zinc finger protein 608 (Renal carcinoma antigen NY-REN-36)	35		18|17	35	17.5	2	2|1|0|0|0|1|2|0|2|1|0|0|0|0|0|0|0|0|0|0|0|0|0|0|0|1|2|2|0|0|2|1|0|0|0|0|0|0|0|0|1|0|0|0	1
ERG	P11308	ENSG00000157554	Ets	P54253	ATX1	Ataxin-1 (Spinocerebellar ataxia type 1 protein)	34		3|8	11	5.5	2	1|1|1|0|0|0|0|0|0|0|0|0|0|0|0|0|0|0|0|0|0|0|0|0|0|0|0|1|0|0|0|0|0|0|0|0|0|0|0|0|0|1|0|0	0.99
ERG	P11308	ENSG00000157554	Ets	Q9Y6Q9	NCOA3	Nuclear receptor coactivator 3 (NCoA-3) (EC 2.3.1.48) (ACTR) (Amplified in breast cancer 1 protein) (AIB-1) (CBP-interacting protein) (pCIP) (Class E basic helix-loop-helix protein 42) (bHLHe42) (Receptor-associated coactivator 3) (RAC-3) (Steroid receptor coactivator protein 3) (SRC-3) (Thyroid hormone receptor activator molecule 1) (TRAM-1)	34	Multisubunit ACTR coactivator complex, ESR1-RELA-BCL3-NCOA3 complex, IKK-alpha--ER-alpha-AIB1 complex, SRC-3 complex, RSmad complex, MAK-ACTR-AR complex	14|12	26	13	2	2|2|0|0|0|0|0|0|0|0|0|0|0|0|0|0|0|0|0|0|0|0|0|0|0|0|1|2|0|0|3|2|0|0|0|0|1|0|0|0|0|0|0|0	1
ERG	P11308	ENSG00000157554	Ets	O15164	TIF1A	Transcription intermediary factor 1-alpha (TIF1-alpha) (EC 2.3.2.27) (E3 ubiquitin-protein ligase TRIM24) (RING finger protein 82) (RING-type E3 ubiquitin transferase TIF1-alpha) (Tripartite motif-containing protein 24)	33		12|11	23	11.5	2	4|1|1|0|1|0|1|1|3|0|0|0|0|0|0|0|0|0|0|0|0|0|0|0|0|0|0|0|0|0|2|2|0|0|0|0|0|0|0|0|0|0|0|0	1
ERG	P11308	ENSG00000157554	Ets	Q8IVH2	FOXP4	Forkhead box protein P4 (Fork head-related protein-like A)	32		6|2	8	4	2	0|1|0|0|0|0|0|0|0|0|0|0|0|0|0|0|0|0|0|0|0|0|0|0|0|0|1|0|0|0|2|0|0|0|0|0|0|0|0|0|0|0|0|0	0.97	X				X	X
ERG	P11308	ENSG00000157554	Ets	Q6PJG2	EMSA1	ELM2 and SANT domain-containing protein 1 (MIDEAS)	32	MiDAC complex	8|8	16	8	2	0|0|0|0|0|0|0|0|0|0|0|1|0|0|1|0|1|0|3|1|1|2|1|1|0|0|0|0|0|0|0|0|0|0|0|0|0|0|0|0|0|0|0|0	1
ERG	P11308	ENSG00000157554	Ets	Q92793	CBP	CREB-binding protein (EC 2.3.1.48)	31	Multisubunit ACTR coactivator complex, p300-CBP-p270-SWI/SNF complex, p300-CBP-p270 complex, HES1 promoter corepressor complex, CREBBP-KAT2B-MYOD1 complex, SRC-3 complex, SRC-1 complex, RSmad complex, SMAD1-CBP complex, RNA polymerase II complex (CBP, PCAF, RPB1, BAF47, CYCC, CDK8), chromatin structure modifying, RNA polymerase II complex, incomplete (CBP, RPBI, PCAF, BAF47), chromatin structure …	30|19	49	24.5	2	0|3|0|0|0|0|0|0|4|0|0|0|0|0|1|1|1|0|0|0|0|0|0|0|0|0|0|0|0|0|0|1|0|0|0|0|0|0|0|0|0|0|0|0	1
ERG	P11308	ENSG00000157554	Ets	Q86UP3	ZFHX4	Zinc finger homeobox protein 4 (Zinc finger homeodomain protein 4) (ZFH-4)	31		8|9	17	8.5	2	0|0|1|0|1|0|0|0|0|0|2|2|2|1|0|0|0|0|0|0|0|0|0|0|0|0|1|3|1|0|1|2|0|0|0|0|1|0|0|0|0|0|0|0	1
ERG	P11308	ENSG00000157554	Ets	Q9NQB0	TF7L2	Transcription factor 7-like 2 (HMG box transcription factor 4) (T-cell-specific transcription factor 4) (T-cell factor 4) (TCF-4) (hTCF-4)	30	Bipartite complex (TFC4, CTNNB1)	6|6	12	6	2	2|0|0|0|0|0|0|0|0|0|0|0|0|0|0|0|0|0|0|0|0|0|0|0|0|0|0|0|0|0|0|0|0|0|0|0|0|0|0|0|0|0|0|0	1
ERG	P11308	ENSG00000157554	Ets	Q9NP66	HM20A	High mobility group protein 20A (HMG box-containing protein 20A) (HMG domain-containing protein 1) (HMG domain-containing protein HMGX1)	29	LSD1 complex	4|5	9	4.5	2	2|2|2|1|3|1|2|3|2|2|0|0|0|0|0|0|0|0|0|0|0|0|0|0|0|0|2|2|0|0|0|2|0|0|0|0|0|1|0|0|1|1|0|0	0.87
ERG	P11308	ENSG00000157554	Ets	Q86U70	LDB1	LIM domain-binding protein 1 (LDB-1) (Carboxyl-terminal LIM domain-binding protein 2) (CLIM-2) (LIM domain-binding factor CLIM2) (hLdb1) (Nuclear LIM interactor)	28	E-box sequence-binding complex, Rb-tal-1-E2A-Lmo2-Ldb1 complex, LMO4-BRCA1-CTIP-LDB1 complex	4|2	6	3	2	0|0|0|0|0|0|0|0|0|0|0|0|0|0|0|0|0|0|0|0|0|0|0|0|0|0|0|0|0|0|0|0|0|0|0|0|0|0|0|0|0|0|0|0	0.97
ERG	P11308	ENSG00000157554	Ets	Q8TE76	MORC4	MORC family CW-type zinc finger protein 4 (Zinc finger CW-type coiled-coil domain protein 2) (Zinc finger CW-type domain protein 4)	28		3|5	8	4	2	0|0|0|0|0|0|0|0|0|0|0|0|0|0|0|0|0|0|0|0|0|0|0|0|0|0|0|0|0|0|0|0|0|0|0|0|0|0|1|0|0|0|0|0	0.99
ERG	P11308	ENSG00000157554	Ets	Q8WUZ0	BCL7C	B-cell CLL/lymphoma 7 protein family member C	27		3|3	6	3	2	1|0|0|0|0|0|1|0|0|0|0|0|0|0|0|0|0|0|0|0|0|0|0|0|0|0|1|2|0|0|0|0|0|0|0|0|0|0|0|0|0|0|0|0	0.98
ERG	P11308	ENSG00000157554	Ets	Q9HCM7	FBSL	Fibrosin-1-like protein (AUTS2-like protein) (HBV X-transactivated gene 9 protein) (HBV XAg-transactivated protein 9)	26		2|2	4	2	2	0|1|0|0|0|0|2|0|0|0|0|0|0|0|0|0|0|0|0|0|0|0|0|0|0|0|0|0|0|0|0|0|0|0|0|0|0|0|0|0|0|0|0|0	0.95
ERG	P11308	ENSG00000157554	Ets	Q06587	RING1	E3 ubiquitin-protein ligase RING1 (EC 2.3.2.27) (Polycomb complex protein RING1) (RING finger protein 1) (RING-type E3 ubiquitin transferase RING1) (Really interesting new gene 1 protein)	25	Polycomb repressive complex 1 (PRC1, hPRC-H), Polycomb repressive complex 1 (PRC1, hPRC-H), CEN complex, BCOR complex, E2F-6 complex, hPRC1L complex, RBP-Jkappa-RING1-KyoT2 complex, Polycomb repressive complex	12|10	22	11	2	9|11|3|0|0|0|10|2|7|5|0|0|0|0|2|1|1|0|1|2|0|2|0|0|1|0|2|4|0|0|0|6|0|0|2|0|0|3|0|0|3|3|0|0	0.85	X		X		X	X
ERG	P11308	ENSG00000157554	Ets	Q6KC79	NIPBL	Nipped-B-like protein (Delangin) (SCC2 homolog)	25		11|14	25	12.5	2	0|0|0|0|0|0|0|0|0|0|0|0|0|0|0|0|0|0|0|0|0|0|0|1|0|0|2|4|0|0|3|4|0|0|0|0|0|0|0|0|2|0|0|0	1
ERG	P11308	ENSG00000157554	Ets	Q9UQR1	ZN148	Zinc finger protein 148 (Transcription factor ZBP-89) (Zinc finger DNA-binding protein 89)	25		4|3	7	3.5	2	0|2|1|0|0|0|1|1|1|1|0|0|0|0|1|0|0|0|0|0|0|0|0|0|0|0|2|1|0|0|1|4|0|0|0|0|0|0|0|0|0|1|0|0	0.86
ERG	P11308	ENSG00000157554	Ets	Q9H147	TDIF1	Deoxynucleotidyltransferase terminal-interacting protein 1 (Terminal deoxynucleotidyltransferase-interacting factor 1) (TdIF1) (TdT-interacting factor 1)	24	MiDAC complex, DNTTIP1-ZNF541-HDAC1-HDAC2 complex	7|3	10	5	2	0|0|0|0|0|0|0|0|0|0|0|0|0|0|0|0|0|0|0|0|0|0|0|0|0|0|0|2|0|0|0|0|0|0|0|0|0|0|0|0|0|0|0|0	1
ERG	P11308	ENSG00000157554	Ets	Q9HAH7	FBRS	Probable fibrosin-1	23		3|3	6	3	2	1|0|0|0|0|0|0|0|1|0|0|0|0|0|0|0|0|0|0|0|0|0|0|0|0|0|1|1|0|0|1|1|0|0|0|0|0|0|0|0|0|0|0|0	0.98
ERG	P11308	ENSG00000157554	Ets	Q2KHR3	QSER1	Glutamine and serine-rich protein 1	22		16|8	24	12	2	3|4|2|2|0|0|0|0|2|2|0|0|0|0|0|1|0|0|0|0|0|0|0|0|0|0|4|2|0|1|3|4|0|0|0|0|0|0|0|0|1|1|0|0	0.99
ERG	P11308	ENSG00000157554	Ets	Q7Z589	EMSY	BRCA2-interacting transcriptional repressor EMSY	21	NIF-1-DBC1-EMSY complex	9|11	20	10	2	3|3|6|2|4|3|4|2|3|3|0|0|0|0|4|0|3|0|2|1|2|1|1|1|0|0|10|14|0|1|2|6|1|0|1|1|0|1|0|0|6|5|2|1	0.76
ERG	P11308	ENSG00000157554	Ets	Q15596	NCOA2	Nuclear receptor coactivator 2 (NCoA-2) (Class E basic helix-loop-helix protein 75) (bHLHe75) (Transcriptional intermediary factor 2) (hTIF2)	21	SRC-3 complex, SRC-1 complex	18|14	32	16	2	11|9|2|2|3|3|7|1|9|5|1|1|1|1|0|0|0|0|0|0|0|0|0|0|0|0|8|6|1|1|4|5|0|0|1|0|0|0|0|0|0|0|1|0	0.95
ERG	P11308	ENSG00000157554	Ets	Q9H7S9	ZN703	Zinc finger protein 703 (Zinc finger elbow-related proline domain protein 1)	20		2|2	4	2	2	0|0|0|0|0|0|0|0|0|0|0|0|0|0|0|0|0|0|0|0|0|0|0|0|0|0|0|0|0|0|0|0|0|0|0|0|0|0|0|0|0|0|0|0	0.94
ERG	P11308	ENSG00000157554	Ets	Q14814	MEF2D	Myocyte-specific enhancer factor 2D	19		7|6	13	6.5	2	2|2|0|0|0|0|2|0|3|0|0|0|0|0|0|0|1|0|0|0|0|0|0|0|1|1|4|3|1|3|4|4|0|0|0|0|2|0|0|0|4|2|0|0	0.89	X				X	X
ERG	P11308	ENSG00000157554	Ets	Q9BRQ0	PYGO2	Pygopus homolog 2	19		4|3	7	3.5	2	0|0|0|1|0|0|0|0|0|0|0|0|0|0|0|0|0|0|0|0|0|0|0|0|0|0|1|1|0|0|0|1|0|0|0|0|0|0|0|0|0|0|0|0	0.99
ERG	P11308	ENSG00000157554	Ets	Q92922	SMRC1	SWI/SNF complex subunit SMARCC1 (BRG1-associated factor 155) (BAF155) (SWI/SNF complex 155 kDa subunit) (SWI/SNF-related matrix-associated actin-dependent regulator of chromatin subfamily C member 1)	18	NUMAC complex (nucleosomal methylation activator complex), PBAF complex (Polybromo- and BAF containing complex), BAF complex, SWI-SNF chromatin remodeling-related-BRCA1 complex, PBAF complex (Polybromo- and BAF containing complex), BAF complex, PBAF complex (Polybromo- and BAF containing complex), BAF complex, PBAF complex (Polybromo- and BAF containing complex), BAF complex, p300-CBP-p270-SWI/SN…	71|74	145	72.5	2	32|38|33|20|39|30|32|17|29|29|19|5|2|4|12|17|18|2|4|9|8|12|10|13|0|0|13|12|4|5|16|17|2|2|19|9|6|5|0|0|25|22|9|7	0.98
ERG	P11308	ENSG00000157554	Ets	Q15532	SSXT	Protein SSXT (Protein SYT) (Synovial sarcoma translocated to X chromosome protein)	18		6|4	10	5	2	0|1|1|0|2|0|1|0|1|0|0|0|0|0|0|0|0|0|0|0|0|0|0|1|0|0|1|1|0|0|1|1|0|0|0|1|0|0|0|0|1|0|0|0	0.99
ERG	P11308	ENSG00000157554	Ets	Q76L83	ASXL2	Putative Polycomb group protein ASXL2 (Additional sex combs-like protein 2)	17		3|4	7	3.5	2	2|1|0|1|0|0|0|0|1|1|0|0|0|0|0|0|0|0|0|0|0|0|0|0|0|0|0|0|0|0|0|0|0|0|0|0|0|0|0|0|1|0|0|0	0.99
ERG	P11308	ENSG00000157554	Ets	Q92585	MAML1	Mastermind-like protein 1 (Mam-1)	17	HES1 promoter-Notch enhancer complex, RBPJ-NOTCH1-MAML1 complex, RBPJ-NOTCH1-MAML1 complex, RBPJ-NOTCH1-MAML1 complex	11|5	16	8	2	4|5|0|0|0|0|2|0|4|0|0|0|0|0|0|0|0|0|0|0|0|0|0|0|0|1|6|3|0|0|4|2|0|0|0|0|0|1|0|0|0|0|0|0	0.89
ERG	P11308	ENSG00000157554	Ets	Q8N488	RYBP	RING1 and YY1-binding protein (Apoptin-associating protein 1) (APAP-1) (Death effector domain-associated factor) (DED-associated factor) (YY1 and E4TF1-associated factor 1)	16	BCOR complex	5|2	7	3.5	2	0|0|0|0|0|0|0|0|2|0|0|0|0|0|0|0|0|0|0|0|0|0|0|0|0|0|1|0|0|0|0|0|0|0|0|0|0|0|0|0|0|0|0|0	0.98
ERG	P11308	ENSG00000157554	Ets	Q8TAQ2	SMRC2	SWI/SNF complex subunit SMARCC2 (BRG1-associated factor 170) (BAF170) (SWI/SNF complex 170 kDa subunit) (SWI/SNF-related matrix-associated actin-dependent regulator of chromatin subfamily C member 2)	14	NUMAC complex (nucleosomal methylation activator complex), PBAF complex (Polybromo- and BAF containing complex), BAF complex, SWI-SNF chromatin remodeling-related-BRCA1 complex, PBAF complex (Polybromo- and BAF containing complex), BAF complex, PBAF complex (Polybromo- and BAF containing complex), BAF complex, PBAF complex (Polybromo- and BAF containing complex), BAF complex, p300-CBP-p270-SWI/SN…	69|67	136	68	2	31|29|33|21|42|26|32|13|31|22|10|3|1|2|12|10|18|2|6|7|7|10|7|9|4|3|12|19|1|4|15|16|0|2|13|11|7|10|0|0|31|28|5|5	0.98
ERG	P11308	ENSG00000157554	Ets	Q12824	SNF5	SWI/SNF-related matrix-associated actin-dependent regulator of chromatin subfamily B member 1 (BRG1-associated factor 47) (BAF47) (Integrase interactor 1 protein) (SNF5 homolog) (hSNF5)	14	NUMAC complex (nucleosomal methylation activator complex), PBAF complex (Polybromo- and BAF containing complex), BAF complex, SWI-SNF chromatin remodeling-related-BRCA1 complex, PBAF complex (Polybromo- and BAF containing complex), BAF complex, PBAF complex (Polybromo- and BAF containing complex), BAF complex, PBAF complex (Polybromo- and BAF containing complex), BAF complex, p300-CBP-p270-SWI/SN…	19|20	39	19.5	2	12|12|15|9|16|10|13|7|10|8|2|1|1|0|4|2|5|1|1|1|1|2|1|1|0|3|3|4|2|3|7|9|0|0|2|2|2|5|0|0|9|6|2|2	0.86
ERG	P11308	ENSG00000157554	Ets	Q9UGU0	TCF20	Transcription factor 20 (TCF-20) (Nuclear factor SPBP) (Protein AR1) (Stromelysin-1 PDGF-responsive element-binding protein) (SPRE-binding protein)	14		14|16	30	15	2	1|1|0|0|0|0|1|0|1|0|0|0|0|0|0|0|0|0|0|0|0|0|0|0|0|0|2|5|0|0|1|3|0|0|0|0|0|1|0|0|0|0|0|0	1
ERG	P11308	ENSG00000157554	Ets	Q969G3	SMCE1	SWI/SNF-related matrix-associated actin-dependent regulator of chromatin subfamily E member 1 (BRG1-associated factor 57) (BAF57)	13	NUMAC complex (nucleosomal methylation activator complex), PBAF complex (Polybromo- and BAF containing complex), BAF complex, SWI-SNF chromatin remodeling-related-BRCA1 complex, PBAF complex (Polybromo- and BAF containing complex), BAF complex, PBAF complex (Polybromo- and BAF containing complex), BAF complex, PBAF complex (Polybromo- and BAF containing complex), BAF complex, Brg1-associated comp…	22|26	48	24	2	13|13|11|5|12|6|17|2|18|12|2|4|2|4|2|1|2|1|1|2|1|3|1|1|6|4|7|11|5|5|12|10|0|1|7|5|2|2|0|0|11|12|4|4	0.88	X				X	X
ERG	P11308	ENSG00000157554	Ets	Q9BQE9	BCL7B	B-cell CLL/lymphoma 7 protein family member B (allergen Hom s 3)	13		6|4	10	5	2	0|0|1|1|1|1|0|0|0|0|0|0|0|0|0|1|0|0|0|0|0|0|0|0|0|0|2|2|0|0|0|0|0|0|0|0|0|0|0|0|0|0|0|0	0.99
ERG	P11308	ENSG00000157554	Ets	Q9H3G5	CPVL	Probable serine carboxypeptidase CPVL (EC 3.4.16.-) (Carboxypeptidase, vitellogenic-like) (Vitellogenic carboxypeptidase-like protein) (VCP-like protein) (hVLP)	13		2|3	5	2.5	2	0|0|0|0|0|0|0|0|0|0|0|0|0|0|0|0|0|0|0|0|0|0|0|0|0|1|0|0|0|1|2|1|0|1|0|1|1|1|0|0|1|0|1|0	0.82
ERG	P11308	ENSG00000157554	Ets	Q14686	NCOA6	Nuclear receptor coactivator 6 (Activating signal cointegrator 2) (ASC-2) (Amplified in breast cancer protein 3) (Cancer-amplified transcriptional coactivator ASC-2) (Nuclear receptor coactivator RAP250) (NRC RAP250) (Nuclear receptor-activating protein, 250 kDa) (Peroxisome proliferator-activated receptor-interacting protein) (PPAR-interacting protein) (PRIP) (Thyroid hormone receptor-binding pr…	13	DICER1-NCOA6-AGO2 complex, ASCOM complex, UTX-MLL2/3 complex, NCOA6-DNA-PK-Ku-PARP1 complex, PTIP-HMT complex, MLL3 complex, MLL4 complex	25|24	49	24.5	2	14|12|8|5|12|6|15|2|12|8|1|1|2|0|3|4|2|0|0|0|0|0|0|0|2|3|14|13|6|9|13|17|0|1|4|4|2|8|0|0|7|10|5|2	0.91
ERG	P11308	ENSG00000157554	Ets	Q9BTK6	PAGR1	PAXIP1-associated glutamate-rich protein 1 (Glutamate-rich coactivator interacting with SRC1) (GAS) (PAXIP1-associated protein 1) (PTIP-associated protein 1)	13	PTIP-HMT complex, MLL3 complex, MLL4 complex	2|2	4	2	2	0|0|0|0|0|0|0|0|0|0|0|0|0|0|0|0|0|0|0|0|0|0|0|0|0|0|0|0|0|0|0|0|0|0|0|0|0|0|0|0|0|0|0|0	0.94
ERG	P11308	ENSG00000157554	Ets	Q5JSZ5	PRC2B	Protein PRRC2B (HLA-B-associated transcript 2-like 1) (Proline-rich coiled-coil protein 2B)	13		7|7	14	7	2	0|0|0|0|0|0|0|0|0|0|0|0|0|0|0|0|0|0|0|0|1|0|0|0|0|0|2|0|2|0|1|1|0|0|0|0|1|5|0|0|0|0|0|0	0.99
ERG	P11308	ENSG00000157554	Ets	P51532	SMCA4	Transcription activator BRG1 (EC 3.6.4.-) (ATP-dependent helicase SMARCA4) (BRG1-associated factor 190A) (BAF190A) (Mitotic growth and transcription activator) (Protein BRG-1) (Protein brahma homolog 1) (SNF2-beta) (SWI/SNF-related matrix-associated actin-dependent regulator of chromatin subfamily A member 4)	13	NUMAC complex (nucleosomal methylation activator complex), PBAF complex (Polybromo- and BAF containing complex), BAF complex, SWI-SNF chromatin remodeling-related-BRCA1 complex, PBAF complex (Polybromo- and BAF containing complex), BAF complex, PBAF complex (Polybromo- and BAF containing complex), PBAF complex (Polybromo- and BAF containing complex), BAF complex, p300-CBP-p270-SWI/SNF complex, Br…	66|60	126	63	2	36|38|39|20|45|24|36|12|37|19|4|3|2|0|8|5|9|2|4|3|5|4|4|4|4|6|22|23|10|8|19|22|0|2|8|8|6|15|0|0|38|40|13|22	0.89
ERG	P11308	ENSG00000157554	Ets	Q6STE5	SMRD3	SWI/SNF-related matrix-associated actin-dependent regulator of chromatin subfamily D member 3 (60 kDa BRG-1/Brm-associated factor subunit C) (BRG1-associated factor 60C) (BAF60C)	13	BRG1-SIN3A complex, BRM-SIN3A complex	10|8	18	9	2	0|0|0|0|0|0|0|0|0|0|0|0|0|0|0|0|0|0|0|0|0|0|0|0|0|0|0|0|0|0|0|0|0|0|0|0|0|0|0|0|0|0|0|0	1
ERG	P11308	ENSG00000157554	Ets	Q9UPN9	TRI33	E3 ubiquitin-protein ligase TRIM33 (EC 2.3.2.27) (Ectodermin homolog) (RET-fused gene 7 protein) (Protein Rfg7) (RING-type E3 ubiquitin transferase TRIM33) (Transcription intermediary factor 1-gamma) (TIF1-gamma) (Tripartite motif-containing protein 33)	11	Kaiso-NCOR complex, Ectodermin-SMAD4 complex, RSmad complex, TIF1gamma-SMAD2-SMAD3 complex	7|5	12	6	2	2|5|5|2|5|3|1|0|4|2|0|0|0|0|0|0|0|0|0|0|0|0|0|0|0|0|4|0|0|0|1|2|0|0|0|0|0|0|0|0|0|0|1|2	0.82	X		X		X	X
ERG	P11308	ENSG00000157554	Ets	O75177	CREST	Calcium-responsive transactivator (SS18-like protein 1) (SYT homolog 1)	11		4|6	10	5	2	0|0|0|0|0|0|0|0|0|0|0|0|0|0|0|0|0|0|0|0|0|0|0|0|0|0|0|0|0|0|0|0|0|0|0|0|0|0|0|0|0|0|0|0	1
ERG	P11308	ENSG00000157554	Ets	O75925	PIAS1	E3 SUMO-protein ligase PIAS1 (EC 2.3.2.-) (DEAD/H box-binding protein 1) (E3 SUMO-protein transferase PIAS1) (Gu-binding protein) (GBP) (Protein inhibitor of activated STAT protein 1) (RNA helicase II-binding protein)	11		3|2	5	2.5	2	0|0|0|0|0|0|0|0|0|0|0|0|0|0|0|0|0|0|0|0|0|0|0|0|0|0|0|0|0|0|0|0|0|0|0|0|0|0|0|0|0|0|0|0	0.97
ERG	P11308	ENSG00000157554	Ets	Q96PK6	RBM14	RNA-binding protein 14 (Paraspeckle protein 2) (PSP2) (RNA-binding motif protein 14) (RRM-containing coactivator activator/modulator) (Synaptotagmin-interacting protein) (SYT-interacting protein)	11		3|4	7	3.5	2	0|0|0|0|0|0|0|0|0|0|0|0|0|0|0|0|0|0|0|0|0|0|0|0|0|0|2|4|0|0|0|0|0|0|0|0|0|0|0|0|0|0|0|0	0.97
ERG	P11308	ENSG00000157554	Ets	Q9NZM4	BICRA	BRD4-interacting chromatin-remodeling complex-associated protein (Glioma tumor suppressor candidate region gene 1 protein)	10		2|2	4	2	2	0|0|0|0|0|0|1|0|0|0|0|0|0|0|0|0|0|0|0|0|0|0|0|0|0|0|4|2|0|0|0|3|0|0|0|0|0|0|0|0|0|0|0|0	0.76
ERG	P11308	ENSG00000157554	Ets	Q6VMQ6	MCAF1	Activating transcription factor 7-interacting protein 1 (ATF-interacting protein) (ATF-IP) (ATF7-interacting protein) (ATFa-associated modulator) (hAM) (MBD1-containing chromatin-associated factor 1) (P621)	10	MBD1-MCAF1-SETDB1 complex, SETDB1-containing HMTase complex, MBD1-MCAF complex	12|9	21	10.5	2	7|11|6|5|7|4|5|3|5|3|1|0|1|0|0|2|1|0|2|1|1|2|0|0|1|0|7|2|0|0|6|7|0|0|0|0|1|0|0|0|6|4|2|1	0.76
ERG	P11308	ENSG00000157554	Ets	Q6N021	TET2	Methylcytosine dioxygenase TET2 (EC 1.14.11.n2)	10		12|7	19	9.5	2	1|0|0|0|0|0|0|0|2|0|0|0|0|0|0|0|0|0|0|0|0|0|0|0|0|0|1|0|0|0|0|1|0|0|0|0|0|0|0|0|1|0|0|0	1
ERG	P11308	ENSG00000157554	Ets	Q6NUN9	ZN746	Zinc finger protein 746 (Parkin-interacting substrate) (PARIS)	9		2|5	7	3.5	2	0|0|0|0|0|0|0|0|0|0|0|0|1|0|0|0|0|0|0|0|0|0|0|0|0|0|0|0|0|0|0|0|0|0|0|0|0|0|0|0|0|0|0|0	0.97
ERG	P11308	ENSG00000157554	Ets	Q01543	FLI1	Friend leukemia integration 1 transcription factor (Proto-oncogene Fli-1) (Transcription factor ERGB)	8	ELK1-SAP1a-EWS-FLI-FLI complex	18|21	39	19.5	2	0|0|0|0|0|0|0|0|0|0|0|0|0|0|0|0|0|0|0|0|0|0|0|0|0|0|0|0|0|0|0|0|0|0|0|0|0|0|0|0|0|0|0|0	1	X			X	X	X
ERG	P11308	ENSG00000157554	Ets	Q96A47	ISL2	Insulin gene enhancer protein ISL-2 (Islet-2)	8		2|2	4	2	2	0|0|0|0|0|0|0|0|0|0|0|0|0|0|0|0|0|0|0|0|0|0|0|0|0|0|0|0|0|0|0|0|0|0|0|0|0|0|0|0|0|0|0|0	0.94
ERG	P11308	ENSG00000157554	Ets	Q96K83	ZN521	Zinc finger protein 521 (Early hematopoietic zinc finger protein) (LYST-interacting protein 3)	8		6|3	9	4.5	2	0|0|0|0|0|0|1|0|0|0|0|0|0|0|0|0|0|0|0|0|0|0|0|0|0|0|0|0|0|0|0|0|0|0|0|0|0|0|0|0|0|0|0|0	0.99
ERG	P11308	ENSG00000157554	Ets	Q6ZRI6	CO039	Uncharacterized protein C15orf39	6		4|3	7	3.5	2	1|0|0|0|0|0|0|0|0|0|0|0|0|0|0|0|0|0|0|0|0|0|0|0|0|0|0|0|0|0|0|0|0|0|0|0|0|0|0|0|0|0|0|0	0.99
ERG	P11308	ENSG00000157554	Ets	Q9Y4B4	ARIP4	Helicase ARIP4 (EC 3.6.4.12) (Androgen receptor-interacting protein 4) (RAD54-like protein 2)	5		5|4	9	4.5	2	0|0|0|0|0|0|0|0|0|0|0|0|0|0|0|0|0|0|0|0|0|0|0|0|0|0|0|0|0|0|0|0|0|0|0|0|0|0|0|0|0|0|0|0	1
ERG	P11308	ENSG00000157554	Ets	P43694	GATA4	Transcription factor GATA-4 (GATA-binding factor 4)	4	Ternary complex (GATA4, SRF, MYOCD)	4|2	6	3	2	0|0|0|0|0|0|0|0|0|0|0|0|0|0|0|0|0|0|0|0|0|0|0|0|0|0|0|0|0|0|0|0|0|0|0|0|0|0|0|0|0|0|0|0	0.97
ERG	P11308	ENSG00000157554	Ets	Q9P2R6	RERE	Arginine-glutamic acid dipeptide repeats protein (Atrophin-1-like protein) (Atrophin-1-related protein)	3		2|2	4	2	2	0|0|0|0|0|0|0|0|0|0|0|0|0|0|0|0|0|0|0|0|0|0|0|0|0|0|0|0|0|0|0|0|0|0|0|0|0|0|0|0|0|0|0|0	0.94	X				X	X
ERG	P11308	ENSG00000157554	Ets	P55197	AF10	Protein AF-10 (ALL1-fused gene from chromosome 10 protein)	3		3|6	9	4.5	2	0|0|0|0|0|0|0|0|0|0|0|0|0|0|0|0|0|0|0|0|0|0|0|0|0|0|0|0|0|0|0|1|0|0|0|0|0|0|0|0|0|0|0|0	0.99
ERG	P11308	ENSG00000157554	Ets	Q92784	DPF3	Zinc finger protein DPF3 (BRG1-associated factor 45C) (BAF45C) (Zinc finger protein cer-d4)	3		9|7	16	8	2	0|0|0|0|0|0|0|0|0|0|0|0|0|0|0|0|0|0|0|0|0|0|0|0|0|0|0|0|0|0|0|0|0|0|0|0|0|0|0|0|0|0|0|0	1
ERG	P11308	ENSG00000157554	Ets	P61968	LMO4	LIM domain transcription factor LMO4 (Breast tumor autoantigen) (LIM domain only protein 4) (LMO-4)	3	LMO4-BRCA1-CTIP-LDB1 complex, BRCA1-LMO4-CTIP complex, LMO4-CREB complex, LMO4-gp130 complex	3|2	5	2.5	2	0|0|0|0|0|0|0|0|0|0|0|0|0|0|0|0|0|0|0|0|0|0|0|0|0|0|0|0|0|0|0|0|0|0|0|0|0|0|0|0|0|0|0|0	0.97
ERG	P11308	ENSG00000157554	Ets	O75030	MITF	Microphthalmia-associated transcription factor (Class E basic helix-loop-helix protein 32) (bHLHe32)	3		3|4	7	3.5	2	0|0|0|0|0|0|0|0|0|0|0|0|0|0|0|0|0|0|0|0|0|0|0|0|0|0|0|1|0|0|0|0|0|0|0|0|0|0|0|0|0|0|0|0	0.99
ERG	P11308	ENSG00000157554	Ets	P11308	ERG	Transcriptional regulator ERG (Transforming protein ERG)	1	ERG-JUN-FOS DNA-protein complex, ETS2-ERG complex	115|72	187	93.5	2	0|0|0|0|0|0|0|0|0|0|0|0|0|0|0|0|0|0|0|0|0|0|0|0|0|0|0|0|0|0|0|0|0|0|0|0|0|0|0|0|0|0|0|0	1	X			X
ERG	P11308	ENSG00000157554	Ets	Q9H2X6	HIPK2	Homeodomain-interacting protein kinase 2 (hHIPk2) (EC 2.7.11.1)	1	FHL2-p53-HIPK2 complex, DAXX-Axin-p53-HIPK2 complex, Axin-p53-HIPK2 complex, NK-3-Groucho-HIPK2-SIN3A-RbpA48-HDAC1 complex	2|3	5	2.5	2	0|0|0|0|0|0|0|0|0|0|0|0|0|0|0|0|0|0|0|0|0|0|0|0|0|0|0|0|0|0|0|0|0|0|0|0|0|0|0|0|0|0|0|0	0.97
ERG	P11308	ENSG00000157554	Ets	Q9HCM1	K1551	Uncharacterized protein KIAA1551	1		5|3	8	4	2	0|0|0|0|0|0|0|0|0|0|0|0|0|0|0|0|0|0|0|0|0|0|0|0|0|0|0|0|0|0|0|0|0|0|0|0|0|0|0|0|0|0|0|0	0.99
ESR1	P03372	ENSG00000091831	Nuclear_receptor	O00763	ACACB	Acetyl-CoA carboxylase 2 (EC 6.4.1.2) (ACC-beta) [Includes: Biotin carboxylase (EC 6.3.4.14)]	22		46|45|58|56	205	51.25	4	0|0|23|23|22|19|0|0|0|0|19|0|0|0|0|22|0|0|16|0|21|0|0|0|0|0|0|0|0|0|0|0|0|0|13|5|0|0|40|32|32|21|21|18	0.95
ESR1	P03372	ENSG00000091831	Nuclear_receptor	Q13162	PRDX4	Peroxiredoxin-4 (EC 1.11.1.15) (Antioxidant enzyme AOE372) (AOE37-2) (Peroxiredoxin IV) (Prx-IV) (Thioredoxin peroxidase AO372) (Thioredoxin-dependent peroxide reductase A0372)	11		3|2|2|4	11	2.75	4	0|0|2|0|0|0|0|0|0|0|0|0|0|2|2|2|2|0|0|0|0|0|0|2|0|0|0|0|0|0|0|0|0|0|0|0|3|0|0|0|0|0|0|0	0.74
ESR1	P03372	ENSG00000091831	Nuclear_receptor	P31942	HNRH3	Heterogeneous nuclear ribonucleoprotein H3 (hnRNP H3) (Heterogeneous nuclear ribonucleoprotein 2H9) (hnRNP 2H9)	9		5|2|4|4	15	3.75	4	1|1|3|2|3|3|4|2|2|1|0|0|0|0|0|0|0|0|0|0|0|0|0|0|0|0|0|0|0|0|0|0|0|0|0|0|0|0|0|0|0|0|0|0	0.76
ESR1	P03372	ENSG00000091831	Nuclear_receptor	Q9NPA3	M1IP1	Mid1-interacting protein 1 (Gastrulation-specific G12-like protein) (Mid1-interacting G12-like protein) (Protein STRAIT11499) (Spot 14-related protein) (S14R) (Spot 14-R)	9		3|4|5|6	18	4.5	4	0|0|0|0|0|2|0|0|0|0|0|0|0|0|1|0|0|0|1|2|0|0|0|0|0|0|0|0|0|0|0|0|0|0|1|0|0|0|3|4|1|0|1|2	0.88
ESR1	P03372	ENSG00000091831	Nuclear_receptor	P13647	K2C5	Keratin, type II cytoskeletal 5 (58 kDa cytokeratin) (Cytokeratin-5) (CK-5) (Keratin-5) (K5) (Type-II keratin Kb5)	6		5|3|6|4	18	4.5	4	0|0|8|0|11|0|0|0|0|0|0|0|0|0|0|0|0|0|0|0|0|0|0|0|0|0|0|0|0|0|0|0|0|0|0|0|0|0|0|0|0|0|0|0	0.89	X				X
ESR1	P03372	ENSG00000091831	Nuclear_receptor	P49207	RL34	60S ribosomal protein L34 (Large ribosomal subunit protein eL34)	6	Ribosome, cytoplasmic, 60S ribosomal subunit, cytoplasmic, TRBP containing complex (DICER, RPL7A, EIF6, MOV10 and subunits of the 60S ribosomal particle)	7|6|7|5	25	6.25	4	1|1|2|0|2|0|2|0|1|0|2|1|4|3|4|3|3|1|4|3|2|3|1|2|0|0|2|0|0|0|0|0|0|0|1|2|1|0|1|2|2|5|1|1	0.82
ESR1	P03372	ENSG00000091831	Nuclear_receptor	Q16775	GLO2	Hydroxyacylglutathione hydrolase, mitochondrial (EC 3.1.2.6) (Glyoxalase II) (Glx II)	4		11|12|12|14	49	12.25	4	1|0|10|3|12|4|3|0|1|1|7|4|6|5|2|4|3|0|3|6|2|4|0|0|0|0|0|0|0|0|2|0|0|0|5|3|1|0|6|5|5|5|1|0	0.84
ESR1	P03372	ENSG00000091831	Nuclear_receptor	P03372	ESR1	Estrogen receptor (ER) (ER-alpha) (Estradiol receptor) (Nuclear receptor subfamily 3 group A member 1)	1	TFTC-type histone acetyl transferase complex, ESR1-RELA-BCL3-NCOA3 complex, IKK-alpha--ER-alpha-AIB1 complex, p130Cas-ER-alpha-cSrc-kinase- PI3-kinase p85-subunit complex, ESR1-CDK7-CCNH-MNAT1-MTA1-HDAC2 complex, Er-alpha-p53-hdm2 complex, ER-alpha-GRIP1-c-Jun complex, ER-alpha-c-Jun complex, CAV1-VDAC1-ESR1 complex, ESR1-SP1 complex, ESR1-CEBPB complex, ESR1-GRIP1 complex, Shc-ERalpha-IGF-1R com…	16|14|21|19	70	17.5	4	0|0|0|0|0|0|0|0|0|0|0|0|0|0|0|0|0|0|0|0|0|0|0|0|0|0|0|0|0|0|0|0|0|0|0|0|0|0|0|0|0|0|0|0	1	X	X	X
ETS1	P14921	ENSG00000134954	Ets	Q8NHM5	KDM2B	Lysine-specific demethylase 2B (EC 1.14.11.27) (CXXC-type zinc finger protein 2) (F-box and leucine-rich repeat protein 10) (F-box protein FBL10) (F-box/LRR-repeat protein 10) (JmjC domain-containing histone demethylation protein 1B) (Jumonji domain-containing EMSY-interactor methyltransferase motif protein) (Protein JEMMA) (Protein-containing CXXC domain 2) ([Histone-H3]-lysine-36 demethylase 1B)	62	BCOR complex	13|5|7|7	32	8	4	1|3|1|0|4|2|2|2|4|2|0|0|0|0|0|0|1|0|0|1|1|0|0|0|0|0|5|5|0|0|0|0|0|0|0|0|0|0|0|0|2|1|0|0	0.9
ETS1	P14921	ENSG00000134954	Ets	O14686	KMT2D	Histone-lysine N-methyltransferase 2D (Lysine N-methyltransferase 2D) (EC 2.1.1.43) (ALL1-related protein) (Myeloid/lymphoid or mixed-lineage leukemia protein 2)	58	WDR5-ASH2L-RBBP5-MLL2 complex, ASCOM complex, MOF complex, UTX-MLL2/3 complex, PITX2-MLL4-ASH2L-RBBP5-PTIP complex, MLL2 complex, MLL4 complex	43|25|28|31	127	31.75	4	4|2|6|6|7|3|1|1|3|3|1|1|2|1|0|0|0|0|0|0|1|1|0|1|0|0|7|12|1|0|7|9|0|0|0|1|0|2|0|0|4|6|0|0	1	X				X	X
ETS1	P14921	ENSG00000134954	Ets	O15550	KDM6A	Lysine-specific demethylase 6A (EC 1.14.11.-) (Histone demethylase UTX) (Ubiquitously-transcribed TPR protein on the X chromosome) (Ubiquitously-transcribed X chromosome tetratricopeptide repeat protein)	53	UTX-MLL2/3 complex, PTIP-HMT complex, MLL3 complex, MLL4 complex	15|13|12|7	47	11.75	4	3|1|3|0|4|0|2|1|1|1|0|0|0|0|0|0|0|0|0|0|0|0|0|0|0|0|0|0|0|0|2|3|0|0|0|0|0|0|0|0|2|1|0|0	0.99	X				X
ETS1	P14921	ENSG00000134954	Ets	P15822	ZEP1	Zinc finger protein 40 (Cirhin interaction protein) (CIRIP) (Gate keeper of apoptosis-activating protein) (GAAP) (Human immunodeficiency virus type I enhancer-binding protein 1) (HIV-EP1) (Major histocompatibility complex-binding protein 1) (MBP-1) (Positive regulatory domain II-binding factor 1) (PRDII-BF1)	52		12|5|6|5	28	7	4	1|1|1|1|0|2|2|0|1|1|0|0|0|0|0|0|0|0|0|0|0|0|0|2|0|0|1|1|0|0|1|2|0|0|0|0|0|0|0|0|1|0|0|0	1	X				X	X
ETS1	P14921	ENSG00000134954	Ets	Q9UHF7	TRPS1	Zinc finger transcription factor Trps1 (Tricho-rhino-phalangeal syndrome type I protein) (Zinc finger protein GC79)	50		8|4|6|7	25	6.25	4	0|0|3|0|1|0|0|0|0|0|0|1|0|1|0|0|0|0|0|0|0|0|0|0|0|0|6|7|0|1|2|4|0|0|0|0|0|0|0|0|0|0|0|0	0.89
ETS1	P14921	ENSG00000134954	Ets	Q86U86	PB1	Protein polybromo-1 (hPB1) (BRG1-associated factor 180) (BAF180) (Polybromo-1D)	48	PBAF complex (Polybromo- and BAF containing complex), PBAF complex (Polybromo- and BAF containing complex), PBAF complex (Polybromo- and BAF containing complex), PBAF complex (Polybromo- and BAF containing complex), PBAF complex (Polybromo- and BAF containing complex)	101|85|68|63	317	79.25	4	6|2|12|8|14|10|2|3|4|2|1|1|0|0|2|0|5|0|0|0|0|0|0|1|1|0|2|3|0|0|1|6|0|0|0|4|0|2|0|0|14|24|8|4	1	X				X	X
ETS1	P14921	ENSG00000134954	Ets	Q6ZW49	PAXI1	PAX-interacting protein 1 (PAX transactivation activation domain-interacting protein)	47	UTX-MLL2/3 complex, PTIP-HMT complex, PTIP-DNA damage response complex, PITX2-MLL4-ASH2L-RBBP5-PTIP complex, MLL3 complex, MLL4 complex	9|6|5|6	26	6.5	4	4|2|6|2|3|2|4|2|3|2|0|0|0|0|0|0|0|0|0|0|0|0|0|0|0|0|2|3|0|0|0|3|0|0|0|0|0|0|0|0|2|0|0|0	0.85
ETS1	P14921	ENSG00000134954	Ets	P51531	SMCA2	Probable global transcription activator SNF2L2 (EC 3.6.4.-) (ATP-dependent helicase SMARCA2) (BRG1-associated factor 190B) (BAF190B) (Protein brahma homolog) (hBRM) (SNF2-alpha) (SWI/SNF-related matrix-associated actin-dependent regulator of chromatin subfamily A member 2)	46	BAF complex, SWI-SNF chromatin remodeling-related-BRCA1 complex, BAF complex, Brm-associated complex, BRM-SIN3A complex, BRM-SIN3A-HDAC complex, BRM-associated complex, WINAC complex, BAF complex, BAF complex, ALL-1 supercomplex, RNA polymerase II complex (RPB1, RAP74, CDK8, CYCC, SRB7, BAF190, BAF47), chromatin structure modifying, RNA polymerase II complex, chromatin structure modifying, RNA po…	55|46|34|38	173	43.25	4	19|18|19|10|23|14|19|7|20|11|2|0|0|0|0|0|0|0|0|0|0|0|0|0|0|0|0|9|0|0|0|0|0|0|0|0|0|0|0|0|14|13|0|0	0.97	X	X		X
ETS1	P14921	ENSG00000134954	Ets	Q8NFD5	ARI1B	AT-rich interactive domain-containing protein 1B (ARID domain-containing protein 1B) (BRG1-associated factor 250b) (BAF250B) (BRG1-binding protein hELD/OSA1) (Osa homolog 2) (hOsa2) (p250R)	45	BAF complex, EBAFb complex, RSmad complex	40|34|34|38	146	36.5	4	12|14|5|3|10|4|9|2|9|3|0|0|0|0|0|0|1|0|0|0|0|0|0|0|1|0|12|19|0|2|4|8|0|0|1|0|0|0|0|0|1|1|0|0	0.99
ETS1	P14921	ENSG00000134954	Ets	Q92782	DPF1	Zinc finger protein neuro-d4 (BRG1-associated factor 45B) (BAF45B) (D4, zinc and double PHD fingers family 1)	45		8|6|5|6	25	6.25	4	0|0|2|0|0|0|0|0|0|0|0|0|0|0|0|0|0|0|0|0|0|0|0|0|0|0|0|0|0|0|0|1|0|0|0|0|0|0|0|0|0|0|0|0	1
ETS1	P14921	ENSG00000134954	Ets	Q92785	REQU	Zinc finger protein ubi-d4 (Apoptosis response zinc finger protein) (BRG1-associated factor 45D) (BAF45D) (D4, zinc and double PHD fingers family 2) (Protein requiem)	43	LARC complex (LCR-associated remodeling complex)	31|24|23|24	102	25.5	4	9|7|7|3|10|4|8|3|8|3|1|1|0|1|0|0|1|0|1|0|0|0|2|1|0|1|5|5|2|5|8|8|0|0|4|4|1|1|0|0|8|8|1|1	0.99
ETS1	P14921	ENSG00000134954	Ets	O14497	ARI1A	AT-rich interactive domain-containing protein 1A (ARID domain-containing protein 1A) (B120) (BRG1-associated factor 250) (BAF250) (BRG1-associated factor 250a) (BAF250A) (Osa homolog 1) (hOSA1) (SWI-like protein) (SWI/SNF complex protein p270) (SWI/SNF-related, matrix-associated, actin-dependent regulator of chromatin subfamily F member 1) (hELD)	42	NUMAC complex (nucleosomal methylation activator complex), BAF complex, SWI-SNF chromatin remodeling-related-BRCA1 complex, BAF complex, BAF complex, BAF complex, p300-CBP-p270-SWI/SNF complex, p300-CBP-p270 complex, Brg1-associated complex I, Brm-associated complex, BRG1-SIN3A complex, BRM-SIN3A complex, SIN3-ING1b complex II, LARC complex (LCR-associated remodeling complex), BRG1-SIN3A-HDAC con…	78|71|60|74	283	70.75	4	23|26|17|5|20|10|15|4|18|4|3|3|2|1|1|0|2|0|0|0|0|0|1|1|1|2|30|40|5|4|20|24|1|0|7|8|4|9|0|0|19|17|3|5	0.99	X				X
ETS1	P14921	ENSG00000134954	Ets	Q9NPI1	BRD7	Bromodomain-containing protein 7 (75 kDa bromodomain protein) (Protein CELTIX-1)	40		45|42|28|32	147	36.75	4	0|0|1|1|1|0|1|0|0|0|0|0|0|0|0|0|0|0|0|0|0|0|0|0|0|0|0|1|0|0|0|3|0|0|0|1|0|0|0|0|1|2|0|2	1
ETS1	P14921	ENSG00000134954	Ets	Q68CP9	ARID2	AT-rich interactive domain-containing protein 2 (ARID domain-containing protein 2) (BRG1-associated factor 200) (BAF200) (Zinc finger protein with activation potential) (Zipzap/p200)	39	PBAF complex (Polybromo- and BAF containing complex), PBAF complex (Polybromo- and BAF containing complex), PBAF complex (Polybromo- and BAF containing complex), PBAF complex (Polybromo- and BAF containing complex), PBAF complex (Polybromo- and BAF containing complex)	68|58|40|38	204	51	4	0|1|3|2|3|2|0|0|0|0|1|0|0|0|0|0|1|0|1|0|1|0|0|0|0|0|5|5|0|1|1|4|0|0|0|1|0|0|0|0|6|6|0|1	1	X				X	X
ETS1	P14921	ENSG00000134954	Ets	Q96GM5	SMRD1	SWI/SNF-related matrix-associated actin-dependent regulator of chromatin subfamily D member 1 (60 kDa BRG-1/Brm-associated factor subunit A) (BRG1-associated factor 60A) (BAF60A) (SWI/SNF complex 60 kDa subunit)	39	NUMAC complex (nucleosomal methylation activator complex), PBAF complex (Polybromo- and BAF containing complex), BAF complex, PBAF complex (Polybromo- and BAF containing complex), BAF complex, PBAF complex (Polybromo- and BAF containing complex), BAF complex, PBAF complex (Polybromo- and BAF containing complex), BAF complex, Brg1-associated complex I, Brm-associated complex, BRG1-SIN3A complex, B…	29|23|20|21	93	23.25	4	9|13|10|6|13|8|9|3|10|5|0|0|0|0|2|0|2|0|0|2|0|1|0|0|0|0|5|7|3|3|9|10|1|2|3|5|0|2|0|0|10|9|3|3	0.95
ETS1	P14921	ENSG00000134954	Ets	Q4VC05	BCL7A	B-cell CLL/lymphoma 7 protein family member A	37		10|4|4|4	22	5.5	4	2|2|0|0|0|0|0|0|0|0|0|0|0|0|0|0|0|0|0|0|0|0|0|0|0|0|0|0|0|0|0|0|0|0|0|0|1|1|0|0|1|1|0|1	0.99
ETS1	P14921	ENSG00000134954	Ets	Q92925	SMRD2	SWI/SNF-related matrix-associated actin-dependent regulator of chromatin subfamily D member 2 (60 kDa BRG-1/Brm-associated factor subunit B) (BRG1-associated factor 60B) (BAF60B)	37	SWI-SNF chromatin remodeling-related-BRCA1 complex, PBAF complex (Polybromo- and BAF containing complex), BAF complex, BRG1-SIN3A complex, BRM-SIN3A complex, LARC complex (LCR-associated remodeling complex), BRM-SIN3A-HDAC complex, BRM-associated complex, EBAFb complex, EBAFa complex	26|24|17|17	84	21	4	8|8|7|6|5|5|6|0|4|6|2|1|1|2|2|2|1|0|1|2|1|1|1|1|1|0|5|9|2|2|4|6|0|1|3|0|2|2|0|0|8|8|4|3	0.99
ETS1	P14921	ENSG00000134954	Ets	Q8IWI9	MGAP	MAX gene-associated protein (MAX dimerization protein 5)	35	E2F-6 complex	25|19|12|14	70	17.5	4	2|1|4|0|4|0|2|0|2|0|1|2|2|1|1|0|1|0|1|1|0|0|0|0|0|0|11|10|0|1|8|11|0|0|0|2|0|3|0|0|4|8|0|0	0.94
ETS1	P14921	ENSG00000134954	Ets	O15164	TIF1A	Transcription intermediary factor 1-alpha (TIF1-alpha) (EC 2.3.2.27) (E3 ubiquitin-protein ligase TRIM24) (RING finger protein 82) (RING-type E3 ubiquitin transferase TIF1-alpha) (Tripartite motif-containing protein 24)	33		14|7|8|10	39	9.75	4	4|1|1|0|1|0|1|1|3|0|0|0|0|0|0|0|0|0|0|0|0|0|0|0|0|0|0|0|0|0|2|2|0|0|0|0|0|0|0|0|0|0|0|0	1
ETS1	P14921	ENSG00000134954	Ets	Q92793	CBP	CREB-binding protein (EC 2.3.1.48)	31	Multisubunit ACTR coactivator complex, p300-CBP-p270-SWI/SNF complex, p300-CBP-p270 complex, HES1 promoter corepressor complex, CREBBP-KAT2B-MYOD1 complex, SRC-3 complex, SRC-1 complex, RSmad complex, SMAD1-CBP complex, RNA polymerase II complex (CBP, PCAF, RPB1, BAF47, CYCC, CDK8), chromatin structure modifying, RNA polymerase II complex, incomplete (CBP, RPBI, PCAF, BAF47), chromatin structure …	6|3|6|4	19	4.75	4	0|3|0|0|0|0|0|0|4|0|0|0|0|0|1|1|1|0|0|0|0|0|0|0|0|0|0|0|0|0|0|1|0|0|0|0|0|0|0|0|0|0|0|0	0.94	X		X	X	X	X
ETS1	P14921	ENSG00000134954	Ets	Q96L91	EP400	E1A-binding protein p400 (EC 3.6.4.-) (CAG repeat protein 32) (Domino homolog) (hDomino) (Trinucleotide repeat-containing gene 12 protein) (p400 kDa SWI2/SNF2-related protein)	28	NuA4/Tip60 HAT complex, NuA4/Tip60 HAT complex, NuA4/Tip60-HAT complex A, DMAP1-associated complex, p400-associated complex, NuA4/Tip60 HAT complex, NuA4/Tip60 HAT complex	38|28|15|15	96	24	4	1|5|7|5|7|4|4|1|2|3|4|2|1|1|2|2|2|0|2|2|2|2|1|2|0|0|7|15|1|0|1|9|0|0|1|1|0|1|0|0|13|10|3|1	0.94
ETS1	P14921	ENSG00000134954	Ets	Q8WUZ0	BCL7C	B-cell CLL/lymphoma 7 protein family member C	27		4|4|5|5	18	4.5	4	1|0|0|0|0|0|1|0|0|0|0|0|0|0|0|0|0|0|0|0|0|0|0|0|0|0|1|2|0|0|0|0|0|0|0|0|0|0|0|0|0|0|0|0	1
ETS1	P14921	ENSG00000134954	Ets	Q92560	BAP1	Ubiquitin carboxyl-terminal hydrolase BAP1 (EC 3.4.19.12) (BRCA1-associated protein 1) (Cerebral protein 6)	22		6|2|4|4	16	4	4	1|1|1|2|0|0|1|0|1|0|0|0|0|0|0|1|0|0|0|0|0|0|0|0|0|0|2|3|0|0|0|0|0|0|0|0|0|0|0|0|1|1|0|0	0.88
ETS1	P14921	ENSG00000134954	Ets	Q96QT6	PHF12	PHD finger protein 12 (PHD factor 1) (Pf1)	22		16|11|10|13	50	12.5	4	1|0|2|0|3|1|2|0|1|0|1|3|2|0|3|1|1|0|1|1|1|1|0|0|0|0|0|5|0|0|0|3|0|0|0|0|0|0|0|0|2|3|0|0	1
ETS1	P14921	ENSG00000134954	Ets	Q7Z589	EMSY	BRCA2-interacting transcriptional repressor EMSY	21	NIF-1-DBC1-EMSY complex	25|16|13|14	68	17	4	3|3|6|2|4|3|4|2|3|3|0|0|0|0|4|0|3|0|2|1|2|1|1|1|0|0|10|14|0|1|2|6|1|0|1|1|0|1|0|0|6|5|2|1	0.94
ETS1	P14921	ENSG00000134954	Ets	Q8WUU5	GATD1	GATA zinc finger domain-containing protein 1 (Ocular development-associated gene protein)	21		8|3|7|5	23	5.75	4	1|3|1|2|0|1|1|1|1|1|0|0|0|0|0|0|0|0|0|0|0|0|0|0|0|0|0|0|0|0|0|2|0|0|0|1|0|0|0|0|1|2|0|1	0.94
ETS1	P14921	ENSG00000134954	Ets	Q8WUB8	PHF10	PHD finger protein 10 (BRG1-associated factor 45a) (BAF45a) (XAP135)	21		20|14|8|8	50	12.5	4	2|1|0|0|0|1|1|1|2|1|0|0|1|0|1|0|0|0|1|0|0|0|0|0|0|0|1|2|0|0|2|2|0|0|0|0|0|0|0|0|2|5|1|0	1
ETS1	P14921	ENSG00000134954	Ets	Q92922	SMRC1	SWI/SNF complex subunit SMARCC1 (BRG1-associated factor 155) (BAF155) (SWI/SNF complex 155 kDa subunit) (SWI/SNF-related matrix-associated actin-dependent regulator of chromatin subfamily C member 1)	18	NUMAC complex (nucleosomal methylation activator complex), PBAF complex (Polybromo- and BAF containing complex), BAF complex, SWI-SNF chromatin remodeling-related-BRCA1 complex, PBAF complex (Polybromo- and BAF containing complex), BAF complex, PBAF complex (Polybromo- and BAF containing complex), BAF complex, PBAF complex (Polybromo- and BAF containing complex), BAF complex, p300-CBP-p270-SWI/SN…	80|59|59|56	254	63.5	4	32|38|33|20|39|30|32|17|29|29|19|5|2|4|12|17|18|2|4|9|8|12|10|13|0|0|13|12|4|5|16|17|2|2|19|9|6|5|0|0|25|22|9|7	0.92
ETS1	P14921	ENSG00000134954	Ets	P49848	TAF6	Transcription initiation factor TFIID subunit 6 (RNA polymerase II TBP-associated factor subunit E) (Transcription initiation factor TFIID 70 kDa subunit) (TAF(II)70) (TAFII-70) (TAFII70) (Transcription initiation factor TFIID 80 kDa subunit) (TAF(II)80) (TAFII-80) (TAFII80)	18	TFIID complex, TFTC complex (TATA-binding protein-free TAF-II-containing complex), TFTC complex (TATA-binding protein-free TAF-II-containing complex), TFTC complex (TATA-binding protein-free TAF-II-containing complex), TFTC complex (TATA-binding protein-free TAF-II-containing complex), TFTC complex (TATA-binding protein-free TAF-II-containing complex), TFIID complex, TFIID-beta complex, TFTC comp…	21|11|7|11	50	12.5	4	5|5|8|3|8|4|5|1|7|3|2|1|1|1|0|0|2|0|1|0|0|1|0|0|0|1|3|3|3|3|8|9|0|1|2|1|0|0|0|0|5|3|3|2	0.76
ETS1	P14921	ENSG00000134954	Ets	Q6P4R8	NFRKB	Nuclear factor related to kappa-B-binding protein (DNA-binding protein R kappa-B) (INO80 complex subunit G)	17	INO80 chromatin remodeling complex	9|7|3|6	25	6.25	4	0|0|0|0|0|0|0|0|0|0|0|0|0|0|0|0|0|0|0|0|0|0|0|0|0|0|0|3|0|0|0|0|0|0|0|0|0|0|0|0|0|0|0|0	0.99	X				X
ETS1	P14921	ENSG00000134954	Ets	Q8TAQ2	SMRC2	SWI/SNF complex subunit SMARCC2 (BRG1-associated factor 170) (BAF170) (SWI/SNF complex 170 kDa subunit) (SWI/SNF-related matrix-associated actin-dependent regulator of chromatin subfamily C member 2)	14	NUMAC complex (nucleosomal methylation activator complex), PBAF complex (Polybromo- and BAF containing complex), BAF complex, SWI-SNF chromatin remodeling-related-BRCA1 complex, PBAF complex (Polybromo- and BAF containing complex), BAF complex, PBAF complex (Polybromo- and BAF containing complex), BAF complex, PBAF complex (Polybromo- and BAF containing complex), BAF complex, p300-CBP-p270-SWI/SN…	81|63|57|59	260	65	4	31|29|33|21|42|26|32|13|31|22|10|3|1|2|12|10|18|2|6|7|7|10|7|9|4|3|12|19|1|4|15|16|0|2|13|11|7|10|0|0|31|28|5|5	0.96
ETS1	P14921	ENSG00000134954	Ets	Q12824	SNF5	SWI/SNF-related matrix-associated actin-dependent regulator of chromatin subfamily B member 1 (BRG1-associated factor 47) (BAF47) (Integrase interactor 1 protein) (SNF5 homolog) (hSNF5)	14	NUMAC complex (nucleosomal methylation activator complex), PBAF complex (Polybromo- and BAF containing complex), BAF complex, SWI-SNF chromatin remodeling-related-BRCA1 complex, PBAF complex (Polybromo- and BAF containing complex), BAF complex, PBAF complex (Polybromo- and BAF containing complex), BAF complex, PBAF complex (Polybromo- and BAF containing complex), BAF complex, p300-CBP-p270-SWI/SN…	33|21|15|18	87	21.75	4	12|12|15|9|16|10|13|7|10|8|2|1|1|0|4|2|5|1|1|1|1|2|1|1|0|3|3|4|2|3|7|9|0|0|2|2|2|5|0|0|9|6|2|2	0.8
ETS1	P14921	ENSG00000134954	Ets	P51532	SMCA4	Transcription activator BRG1 (EC 3.6.4.-) (ATP-dependent helicase SMARCA4) (BRG1-associated factor 190A) (BAF190A) (Mitotic growth and transcription activator) (Protein BRG-1) (Protein brahma homolog 1) (SNF2-beta) (SWI/SNF-related matrix-associated actin-dependent regulator of chromatin subfamily A member 4)	13	NUMAC complex (nucleosomal methylation activator complex), PBAF complex (Polybromo- and BAF containing complex), BAF complex, SWI-SNF chromatin remodeling-related-BRCA1 complex, PBAF complex (Polybromo- and BAF containing complex), BAF complex, PBAF complex (Polybromo- and BAF containing complex), PBAF complex (Polybromo- and BAF containing complex), BAF complex, p300-CBP-p270-SWI/SNF complex, Br…	90|75|51|62	278	69.5	4	36|38|39|20|45|24|36|12|37|19|4|3|2|0|8|5|9|2|4|3|5|4|4|4|4|6|22|23|10|8|19|22|0|2|8|8|6|15|0|0|38|40|13|22	0.8	X				X	X
ETS1	P14921	ENSG00000134954	Ets	Q12830	BPTF	Nucleosome-remodeling factor subunit BPTF (Bromodomain and PHD finger-containing transcription factor) (Fetal Alz-50 clone 1 protein) (Fetal Alzheimer antigen)	13	hNURF complex, hNURF complex	12|8|8|6	34	8.5	4	8|7|3|1|1|1|2|2|4|3|2|0|0|0|2|1|2|0|0|0|1|0|1|1|0|0|6|3|0|0|3|2|0|0|0|0|0|0|0|0|1|1|0|1	0.84	X				X	X
ETS1	P14921	ENSG00000134954	Ets	Q969G3	SMCE1	SWI/SNF-related matrix-associated actin-dependent regulator of chromatin subfamily E member 1 (BRG1-associated factor 57) (BAF57)	13	NUMAC complex (nucleosomal methylation activator complex), PBAF complex (Polybromo- and BAF containing complex), BAF complex, SWI-SNF chromatin remodeling-related-BRCA1 complex, PBAF complex (Polybromo- and BAF containing complex), BAF complex, PBAF complex (Polybromo- and BAF containing complex), BAF complex, PBAF complex (Polybromo- and BAF containing complex), BAF complex, Brg1-associated comp…	30|27|20|23	100	25	4	13|13|11|5|12|6|17|2|18|12|2|4|2|4|2|1|2|1|1|2|1|3|1|1|6|4|7|11|5|5|12|10|0|1|7|5|2|2|0|0|11|12|4|4	0.86	X				X	X
ETS1	P14921	ENSG00000134954	Ets	Q6STE5	SMRD3	SWI/SNF-related matrix-associated actin-dependent regulator of chromatin subfamily D member 3 (60 kDa BRG-1/Brm-associated factor subunit C) (BRG1-associated factor 60C) (BAF60C)	13	BRG1-SIN3A complex, BRM-SIN3A complex	7|8|4|7	26	6.5	4	0|0|0|0|0|0|0|0|0|0|0|0|0|0|0|0|0|0|0|0|0|0|0|0|0|0|0|0|0|0|0|0|0|0|0|0|0|0|0|0|0|0|0|0	1
ETS1	P14921	ENSG00000134954	Ets	Q9NS73	MBIP1	MAP3K12-binding inhibitory protein 1 (MAPK upstream kinase-binding inhibitory protein) (MUK-binding inhibitory protein)	12	ATAC complex, GCN5-linked, ATAC complex, YEATS2-linked	14|12|10|11	47	11.75	4	3|3|9|3|8|3|3|1|3|1|2|4|3|1|2|1|3|0|1|0|1|2|0|1|0|0|3|6|0|0|2|4|0|0|0|0|0|0|0|0|4|0|1|1	0.94
ETS1	P14921	ENSG00000134954	Ets	Q6ZU65	UBN2	Ubinuclein-2	12		5|3|2|2	12	3	4	0|0|0|0|0|0|0|0|0|0|0|0|0|0|0|0|0|0|0|0|0|0|0|0|0|0|1|2|0|0|0|0|0|0|0|0|0|0|0|0|0|0|0|0	0.97
ETS1	P14921	ENSG00000134954	Ets	O75177	CREST	Calcium-responsive transactivator (SS18-like protein 1) (SYT homolog 1)	11		3|4|3|4	14	3.5	4	0|0|0|0|0|0|0|0|0|0|0|0|0|0|0|0|0|0|0|0|0|0|0|0|0|0|0|0|0|0|0|0|0|0|0|0|0|0|0|0|0|0|0|0	0.99
ETS1	P14921	ENSG00000134954	Ets	Q13162	PRDX4	Peroxiredoxin-4 (EC 1.11.1.15) (Antioxidant enzyme AOE372) (AOE37-2) (Peroxiredoxin IV) (Prx-IV) (Thioredoxin peroxidase AO372) (Thioredoxin-dependent peroxide reductase A0372)	11		6|6|5|3	20	5	4	0|0|2|0|0|0|0|0|0|0|0|0|0|2|2|2|2|0|0|0|0|0|0|2|0|0|0|0|0|0|0|0|0|0|0|0|3|0|0|0|0|0|0|0	0.94
ETS1	P14921	ENSG00000134954	Ets	Q6ZRS2	SRCAP	Helicase SRCAP (EC 3.6.4.-) (Domino homolog 2) (Snf2-related CBP activator)	9	SRCAP-associated chromatin remodeling complex, DMAP1-associated complex, NCOR1 complex	19|15|9|11	54	13.5	4	9|9|4|5|10|7|9|6|7|4|0|0|0|0|1|0|3|0|0|0|0|0|1|1|1|0|6|10|1|0|1|5|0|1|1|3|0|1|0|0|3|5|0|0	0.79
ETS1	P14921	ENSG00000134954	Ets	Q96FJ2	DYL2	Dynein light chain 2, cytoplasmic (8 kDa dynein light chain b) (DLC8b) (Dynein light chain LC8-type 2)	6	Dynein-2 complex, cytoplasmic	4|3|3|3	13	3.25	4	0|0|2|0|3|0|0|0|0|0|0|0|0|0|0|0|0|0|0|0|0|0|0|0|0|0|0|0|0|0|0|0|0|0|0|0|0|3|1|1|0|0|0|0	0.9
ETS1	P14921	ENSG00000134954	Ets	P14921	ETS1	Protein C-ets-1 (p54)	1	ETS2-ETS1 complex	48|46|29|47	170	42.5	4	0|0|0|0|0|0|0|0|0|0|0|0|0|0|0|0|0|0|0|0|0|0|0|0|0|0|0|0|0|0|0|0|0|0|0|0|0|0|0|0|0|0|0|0	1	X	X					X
ETV3	P41162	ENSG00000117036	Ets	Q12857	NFIA	Nuclear factor 1 A-type (NF1-A) (Nuclear factor 1/A) (CCAAT-box-binding transcription factor) (CTF) (Nuclear factor I/A) (NF-I/A) (NFI-A) (TGGCA-binding protein)	54		4|4	8	4	2	4|2|3|0|0|0|3|0|3|0|0|0|1|0|0|0|0|0|0|0|0|0|0|0|0|0|1|0|0|3|3|0|0|0|0|0|0|0|0|0|0|1|0|0	0.8
ETV3	P41162	ENSG00000117036	Ets	Q86U86	PB1	Protein polybromo-1 (hPB1) (BRG1-associated factor 180) (BAF180) (Polybromo-1D)	48	PBAF complex (Polybromo- and BAF containing complex), PBAF complex (Polybromo- and BAF containing complex), PBAF complex (Polybromo- and BAF containing complex), PBAF complex (Polybromo- and BAF containing complex), PBAF complex (Polybromo- and BAF containing complex)	19|20	39	19.5	2	6|2|12|8|14|10|2|3|4|2|1|1|0|0|2|0|5|0|0|0|0|0|0|1|1|0|2|3|0|0|1|6|0|0|0|4|0|2|0|0|14|24|8|4	0.89
ETV3	P41162	ENSG00000117036	Ets	Q92782	DPF1	Zinc finger protein neuro-d4 (BRG1-associated factor 45B) (BAF45B) (D4, zinc and double PHD fingers family 1)	45		2|2	4	2	2	0|0|2|0|0|0|0|0|0|0|0|0|0|0|0|0|0|0|0|0|0|0|0|0|0|0|0|0|0|0|0|1|0|0|0|0|0|0|0|0|0|0|0|0	0.95
ETV3	P41162	ENSG00000117036	Ets	Q9H582	ZN644	Zinc finger protein 644 (Zinc finger motif enhancer-binding protein 2) (Zep-2)	43		3|5	8	4	2	0|0|0|0|0|0|0|0|0|0|0|0|0|0|0|0|0|0|0|0|0|0|0|0|0|0|2|3|0|0|1|3|0|0|0|0|0|0|0|0|1|0|0|0	0.93
ETV3	P41162	ENSG00000117036	Ets	Q9P2D1	CHD7	Chromodomain-helicase-DNA-binding protein 7 (CHD-7) (EC 3.6.4.12) (ATP-dependent helicase CHD7)	40		8|15	23	11.5	2	0|10|0|0|0|0|14|0|10|0|0|0|0|0|0|0|0|0|0|0|0|3|0|0|0|0|11|14|0|0|5|7|0|0|0|0|0|0|0|0|7|4|0|0	0.81
ETV3	P41162	ENSG00000117036	Ets	Q68CP9	ARID2	AT-rich interactive domain-containing protein 2 (ARID domain-containing protein 2) (BRG1-associated factor 200) (BAF200) (Zinc finger protein with activation potential) (Zipzap/p200)	39	PBAF complex (Polybromo- and BAF containing complex), PBAF complex (Polybromo- and BAF containing complex), PBAF complex (Polybromo- and BAF containing complex), PBAF complex (Polybromo- and BAF containing complex), PBAF complex (Polybromo- and BAF containing complex)	5|10	15	7.5	2	0|1|3|2|3|2|0|0|0|0|1|0|0|0|0|0|1|0|1|0|1|0|0|0|0|0|5|5|0|1|1|4|0|0|0|1|0|0|0|0|6|6|0|1	0.82	X				X	X
ETV3	P41162	ENSG00000117036	Ets	Q96KQ7	EHMT2	Histone-lysine N-methyltransferase EHMT2 (EC 2.1.1.-) (EC 2.1.1.43) (Euchromatic histone-lysine N-methyltransferase 2) (HLA-B-associated transcript 8) (Histone H3-K9 methyltransferase 3) (H3-K9-HMTase 3) (Lysine N-methyltransferase 1C) (Protein G9a)	38	CtBP complex, CtBP core complex, DNMT1-G9a-PCNA complex, DNMT1-G9a complex, E2F-6 complex	12|13	25	12.5	2	3|3|2|0|0|3|2|1|6|4|0|0|0|0|0|0|1|0|0|0|0|0|1|1|0|1|9|8|0|0|1|3|0|0|0|0|0|0|0|0|0|2|0|0	0.96
ETV3	P41162	ENSG00000117036	Ets	O00712	NFIB	Nuclear factor 1 B-type (NF1-B) (Nuclear factor 1/B) (CCAAT-box-binding transcription factor) (CTF) (Nuclear factor I/B) (NF-I/B) (NFI-B) (TGGCA-binding protein)	38		3|3	6	3	2	0|0|0|0|1|1|0|0|0|0|0|0|0|0|0|0|0|0|0|0|0|0|0|0|0|0|0|0|0|0|2|1|0|0|0|0|0|0|0|0|0|0|0|0	0.98
ETV3	P41162	ENSG00000117036	Ets	P13056	NR2C1	Nuclear receptor subfamily 2 group C member 1 (Orphan nuclear receptor TR2) (Testicular receptor 2)	36		2|5	7	3.5	2	2|2|0|0|0|0|1|0|0|1|0|0|0|0|0|0|0|0|0|0|0|0|0|0|0|1|0|1|0|0|1|0|0|0|0|0|0|0|0|0|0|0|1|0	0.87
ETV3	P41162	ENSG00000117036	Ets	Q8IWI9	MGAP	MAX gene-associated protein (MAX dimerization protein 5)	35	E2F-6 complex	10|14	24	12	2	2|1|4|0|4|0|2|0|2|0|1|2|2|1|1|0|1|0|1|1|0|0|0|0|0|0|11|10|0|1|8|11|0|0|0|2|0|3|0|0|4|8|0|0	0.86
ETV3	P41162	ENSG00000117036	Ets	Q9H9B1	EHMT1	Histone-lysine N-methyltransferase EHMT1 (EC 2.1.1.-) (EC 2.1.1.43) (Euchromatic histone-lysine N-methyltransferase 1) (Eu-HMTase1) (G9a-like protein 1) (GLP) (GLP1) (Histone H3-K9 methyltransferase 5) (H3-K9-HMTase 5) (Lysine N-methyltransferase 1D)	34	CtBP complex, CtBP core complex, E2F-6 complex	10|12	22	11	2	7|6|1|0|4|0|9|1|8|4|0|0|0|0|0|0|0|0|0|0|0|0|0|0|1|0|6|9|1|0|5|10|0|0|0|0|1|0|0|0|0|2|0|0	0.86
ETV3	P41162	ENSG00000117036	Ets	Q01826	SATB1	DNA-binding protein SATB1 (Special AT-rich sequence-binding protein 1)	26		6|8	14	7	2	8|5|3|0|0|0|6|3|6|3|1|1|1|0|0|1|0|0|0|0|0|0|0|0|0|0|3|2|0|0|6|2|0|0|0|0|0|0|0|0|5|3|0|0	0.76
ETV3	P41162	ENSG00000117036	Ets	Q9UQR1	ZN148	Zinc finger protein 148 (Transcription factor ZBP-89) (Zinc finger DNA-binding protein 89)	25		4|7	11	5.5	2	0|2|1|0|0|0|1|1|1|1|0|0|0|0|1|0|0|0|0|0|0|0|0|0|0|0|2|1|0|0|1|4|0|0|0|0|0|0|0|0|0|1|0|0	0.96	X				X	X
ETV3	P41162	ENSG00000117036	Ets	Q969R5	LMBL2	Lethal(3)malignant brain tumor-like protein 2 (H-l(3)mbt-like protein 2) (L(3)mbt-like protein 2)	25	E2F-6 complex	3|3	6	3	2	0|0|0|0|0|0|0|0|0|0|0|0|0|0|0|0|0|0|0|0|0|0|0|0|0|0|1|2|0|0|0|0|0|0|0|0|0|0|0|0|0|0|0|0	0.99
ETV3	P41162	ENSG00000117036	Ets	P49116	NR2C2	Nuclear receptor subfamily 2 group C member 2 (Orphan nuclear receptor TAK1) (Orphan nuclear receptor TR4) (Testicular receptor 4)	24		2|3	5	2.5	2	0|0|0|0|0|0|0|0|0|0|0|0|0|1|0|0|0|0|0|0|0|0|0|0|0|0|1|1|0|0|0|0|0|0|0|0|0|0|0|0|0|0|0|0	0.97
ETV3	P41162	ENSG00000117036	Ets	Q13610	PWP1	Periodic tryptophan protein 1 homolog (Keratinocyte protein IEF SSP 9502)	24	Nop56p-associated pre-rRNA complex	3|4	7	3.5	2	0|0|1|1|1|0|0|0|0|0|1|0|0|0|0|0|0|0|0|0|0|0|0|0|0|0|0|1|0|0|0|0|0|0|0|0|1|1|0|0|1|1|2|1	0.95
ETV3	P41162	ENSG00000117036	Ets	Q15906	VPS72	Vacuolar protein sorting-associated protein 72 homolog (Protein YL-1) (Transcription factor-like 1)	23	SRCAP-associated chromatin remodeling complex, NuA4/Tip60 HAT complex, DMAP1-associated complex	3|2	5	2.5	2	2|1|0|0|2|0|0|0|1|0|0|0|0|0|0|0|0|0|0|0|0|0|0|0|0|0|1|2|0|0|0|2|0|0|0|0|0|0|0|0|1|2|0|0	0.75
ETV3	P41162	ENSG00000117036	Ets	Q9BRJ6	CG050	Uncharacterized protein C7orf50	20		3|5	8	4	2	1|0|1|0|0|0|0|0|0|0|0|1|1|0|0|0|0|0|1|0|0|0|0|0|0|1|0|2|0|0|1|2|0|0|0|0|0|0|0|0|1|0|0|1	0.97
ETV3	P41162	ENSG00000117036	Ets	Q9BZE4	NOG1	Nucleolar GTP-binding protein 1 (Chronic renal failure gene protein) (GTP-binding protein NGB)	18		7|9	16	8	2	0|0|3|3|3|1|1|0|1|1|2|2|1|0|2|3|3|0|2|2|2|1|0|0|0|0|3|3|0|0|0|3|0|0|0|0|0|2|0|2|6|9|4|3	0.83
ETV3	P41162	ENSG00000117036	Ets	Q96ME7	ZN512	Zinc finger protein 512	18		11|13	24	12	2	1|2|1|0|1|0|1|0|2|0|2|1|1|0|0|0|0|0|0|0|0|0|0|0|0|2|4|5|1|1|3|5|0|1|0|2|0|0|0|0|3|8|4|4	0.98
ETV3	P41162	ENSG00000117036	Ets	Q9GZR7	DDX24	ATP-dependent RNA helicase DDX24 (EC 3.6.4.13) (DEAD box protein 24)	17		7|12	19	9.5	2	0|0|0|0|2|0|0|1|1|0|4|2|1|0|0|0|1|1|1|0|1|1|0|0|0|0|3|5|1|1|3|1|0|0|0|3|0|1|0|0|5|8|6|5	0.88
ETV3	P41162	ENSG00000117036	Ets	Q9NW13	RBM28	RNA-binding protein 28 (RNA-binding motif protein 28)	17	Parvulin-associated pre-rRNP complex, Nop56p-associated pre-rRNA complex	8|9	17	8.5	2	1|1|5|1|2|2|2|3|2|2|0|0|0|0|0|0|0|0|0|0|0|0|0|0|0|0|1|2|0|0|0|0|0|0|0|0|0|1|0|0|3|4|3|2	0.98
ETV3	P41162	ENSG00000117036	Ets	O95793	STAU1	Double-stranded RNA-binding protein Staufen homolog 1	17	IGF2BP1 complex	5|5	10	5	2	1|0|0|1|0|0|0|0|0|0|3|3|2|0|1|1|2|0|0|1|0|2|0|0|1|0|0|1|1|0|0|0|1|0|1|0|0|1|0|0|0|1|4|3	0.9
ETV3	P41162	ENSG00000117036	Ets	Q96GQ7	DDX27	Probable ATP-dependent RNA helicase DDX27 (EC 3.6.4.13) (DEAD box protein 27)	15	DDX27-PeBoW complex	4|4	8	4	2	0|0|0|0|0|0|0|0|0|0|0|0|0|0|0|0|0|0|0|0|0|0|0|0|0|0|0|1|0|0|0|0|0|0|0|0|0|0|0|0|1|2|0|2	0.99
ETV3	P41162	ENSG00000117036	Ets	Q9UQE7	SMC3	Structural maintenance of chromosomes protein 3 (SMC protein 3) (SMC-3) (Basement membrane-associated chondroitin proteoglycan) (Bamacan) (Chondroitin sulfate proteoglycan 6) (Chromosome-associated polypeptide) (hCAP)	15	Cohesin-SA1 complex, Cohesin-SA2 complex, Cohesin-SA2 complex, Cohesin-SA1 complex, Cohesin-SA1 complex, Cohesin-SA2 complex, SNF2h-cohesin-NuRD complex, Sororin-cohesin complex, SMC1-SMC3 complex, Sororin-cohesin complex, DDX11-RAD21-SMC1A-SMC3 complex	15|13	28	14	2	2|4|8|1|8|3|4|0|4|1|1|1|1|1|4|1|1|0|1|1|1|1|1|1|0|0|6|4|0|0|2|5|0|0|1|3|0|0|0|0|4|4|2|2	0.98
ETV3	P41162	ENSG00000117036	Ets	Q06546	GABPA	GA-binding protein alpha chain (GABP subunit alpha) (Nuclear respiratory factor 2 subunit alpha) (Transcription factor E4TF1-60)	14		4|7	11	5.5	2	2|1|1|2|1|0|2|0|1|0|0|0|0|0|2|0|0|0|0|0|0|0|0|0|0|0|0|0|1|0|0|5|0|0|0|0|0|0|0|0|2|1|0|0	0.91	X				X
ETV3	P41162	ENSG00000117036	Ets	Q9UI36	DACH1	Dachshund homolog 1 (Dach1)	14		2|2	4	2	2	0|0|0|0|0|0|0|0|0|0|0|0|0|0|0|0|0|0|0|0|0|0|0|0|0|1|0|2|0|2|0|0|0|0|0|0|0|0|0|0|1|1|0|0	0.86	X				X
ETV3	P41162	ENSG00000117036	Ets	Q9Y3B7	RM11	39S ribosomal protein L11, mitochondrial (L11mt) (MRP-L11) (Mitochondrial large ribosomal subunit protein uL11m)	14	55S ribosome, mitochondrial, 39S ribosomal subunit, mitochondrial	2|3	5	2.5	2	0|0|1|0|0|0|0|0|0|0|0|0|0|0|0|0|0|0|0|0|0|0|0|0|0|0|0|1|0|0|0|1|0|0|1|1|0|0|0|0|3|2|1|1	0.79
ETV3	P41162	ENSG00000117036	Ets	Q14683	SMC1A	Structural maintenance of chromosomes protein 1A (SMC protein 1A) (SMC-1-alpha) (SMC-1A) (Sb1.8)	14	Cohesin-SA1 complex, Cohesin-SA2 complex, Cohesin-SA2 complex, Cohesin-SA1 complex, Cohesin-SA1 complex, Cohesin-SA2 complex, SNF2h-cohesin-NuRD complex, Sororin-cohesin complex, MDC1-p53BP1-SMC1 complex, SMC1-SMC3 complex, Sororin-cohesin complex, DDX11-RAD21-SMC1A-SMC3 complex	15|14	29	14.5	2	4|2|8|3|8|1|3|2|4|2|1|2|2|0|0|0|0|0|0|0|0|0|0|0|0|0|10|13|0|0|3|8|0|0|0|2|0|1|0|0|7|5|3|5	0.91
ETV3	P41162	ENSG00000117036	Ets	Q9NY93	DDX56	Probable ATP-dependent RNA helicase DDX56 (EC 3.6.4.13) (ATP-dependent 61 kDa nucleolar RNA helicase) (DEAD box protein 21) (DEAD box protein 56)	13		6|7	13	6.5	2	1|0|0|0|0|0|0|0|0|1|0|0|0|0|0|0|0|0|0|0|0|0|0|0|0|0|2|3|1|0|0|0|0|0|0|0|0|1|0|0|0|2|1|2	0.99
ETV3	P41162	ENSG00000117036	Ets	Q9NZM5	NOP53	Ribosome biogenesis protein NOP53 (Glioma tumor suppressor candidate region gene 2 protein) (Protein interacting with carboxyl terminus 1) (PICT-1) (p60)	13		2|3	5	2.5	2	0|0|0|0|0|0|1|0|1|0|0|0|0|0|0|0|0|0|0|0|0|0|0|0|0|0|2|1|0|0|0|0|0|0|0|0|0|0|0|0|3|3|1|1	0.76
ETV3	P41162	ENSG00000117036	Ets	Q9BY77	PDIP3	Polymerase delta-interacting protein 3 (46 kDa DNA polymerase delta interaction protein) (p46) (S6K1 Aly/REF-like target) (SKAR)	13		3|3	6	3	2	0|0|0|0|0|0|0|0|0|0|0|0|0|0|1|0|0|0|1|1|0|1|0|0|0|0|0|2|0|0|0|0|0|0|0|0|0|0|0|0|0|0|0|0	0.98
ETV3	P41162	ENSG00000117036	Ets	P42696	RBM34	RNA-binding protein 34 (RNA-binding motif protein 34)	13		8|8	16	8	2	0|0|1|0|2|2|0|1|2|1|0|1|0|0|0|0|0|0|0|0|0|0|0|0|0|0|2|2|0|0|0|1|0|0|0|2|0|0|0|1|1|3|2|4	0.99
ETV3	P41162	ENSG00000117036	Ets	Q71UM5	RS27L	40S ribosomal protein S27-like (Small ribosomal subunit protein eS27-like)	13		2|2	4	2	2	0|0|3|0|0|0|0|0|0|0|0|0|0|0|0|0|0|0|0|0|0|0|0|0|0|0|0|0|0|0|0|0|0|0|0|0|0|0|0|0|0|0|2|2	0.86
ETV3	P41162	ENSG00000117036	Ets	A6NHR9	SMHD1	Structural maintenance of chromosomes flexible hinge domain-containing protein 1 (SMC hinge domain-containing protein 1)	13		23|35	58	29	2	9|8|7|6|7|8|8|3|4|3|1|1|1|1|0|0|0|0|0|0|0|0|0|0|0|0|7|5|2|1|13|13|0|0|1|1|1|0|0|0|10|10|5|5	0.98
ETV3	P41162	ENSG00000117036	Ets	P05141	ADT2	ADP/ATP translocase 2 (ADP,ATP carrier protein 2) (ADP,ATP carrier protein, fibroblast isoform) (Adenine nucleotide translocator 2) (ANT 2) (Solute carrier family 25 member 5) [Cleaved into: ADP/ATP translocase 2, N-terminally processed]	12	Nop56p-associated pre-rRNA complex, prohibitin 2 complex, mitochondrial	4|3	7	3.5	2	0|0|1|0|2|1|2|0|1|0|0|0|0|0|0|0|0|0|0|0|0|0|0|0|0|0|0|0|0|0|0|0|0|0|0|0|0|0|0|0|0|0|0|2	0.95
ETV3	P41162	ENSG00000117036	Ets	Q7L2E3	DHX30	Putative ATP-dependent RNA helicase DHX30 (EC 3.6.4.13) (DEAH box protein 30)	12	H2AX complex I, protein complex (DDX28; DHX30; GRSF1; FASTKD2; FASTKD5)	4|4	8	4	2	1|0|3|1|2|1|0|0|0|1|1|0|0|0|1|0|0|0|0|0|0|1|0|0|0|0|0|0|0|0|0|0|0|0|0|0|0|0|0|3|2|0|5|6	0.74
ETV3	P41162	ENSG00000117036	Ets	O00268	TAF4	Transcription initiation factor TFIID subunit 4 (RNA polymerase II TBP-associated factor subunit C) (TBP-associated factor 4) (Transcription initiation factor TFIID 130 kDa subunit) (TAF(II)130) (TAFII-130) (TAFII130) (Transcription initiation factor TFIID 135 kDa subunit) (TAF(II)135) (TAFII-135) (TAFII135)	12	TFIID complex, TFTC complex (TATA-binding protein-free TAF-II-containing complex), TFTC complex (TATA-binding protein-free TAF-II-containing complex), TFTC complex (TATA-binding protein-free TAF-II-containing complex), TFTC complex (TATA-binding protein-free TAF-II-containing complex), TFTC complex (TATA-binding protein-free TAF-II-containing complex), TFIID complex, TFIID-beta complex, TFTC comp…	8|9	17	8.5	2	1|3|8|4|12|7|2|1|1|0|1|0|0|0|0|0|0|0|0|0|0|1|0|0|0|0|10|11|0|0|4|6|0|0|1|0|0|0|0|0|5|2|0|1	0.74
ETV3	P41162	ENSG00000117036	Ets	O60264	SMCA5	SWI/SNF-related matrix-associated actin-dependent regulator of chromatin subfamily A member 5 (SWI/SNF-related matrix-associated actin-dependent regulator of chromatin A5) (EC 3.6.4.-) (Sucrose nonfermenting protein 2 homolog) (hSNF2H)	11	DNMT3B complex, SNF2H-BAZ1A complex, Polycomb repressive complex 1 (PRC1, hPRC-H), Polycomb repressive complex 1 (PRC1, hPRC-H), HuCHRAC complex, WICH complex, SNF2h-cohesin-NuRD complex, Remodeling and spacing factor (RSF) complex, SNF2H-BAZ1A complex, CEN complex, ALL-1 supercomplex, SNF2h-HDAC12 complex, Nucleolar remodeling complex (NoRC complex), B-WICH complex, B-WICH complex	11|15	26	13	2	10|6|4|5|8|4|1|3|2|2|0|1|0|0|1|0|3|0|0|0|0|0|0|0|0|2|4|6|0|0|2|2|0|0|0|0|0|0|0|0|4|4|0|3	0.93	X				X	X
ETV3	P41162	ENSG00000117036	Ets	P54132	BLM	Bloom syndrome protein (EC 3.6.4.12) (DNA helicase, RecQ-like type 2) (RecQ2) (RecQ protein-like 3)	11	BRAFT complex, BLM complex III, BRAFT complex, BASC complex (BRCA1-associated genome surveillance complex), BASC (Ab 80) complex (BRCA1-associated genome surveillance complex), BLM-TRF2 complex, BLM-TRF2 complex, BLM complex II, BLM-TOP3A complex, MSH2/6-BLM-p53-RAD51 complex, BLM-RAD51L3-XRCC2 complex, BLM complex II, FA complex (Fanconi anemia complex), PTIP-DNA damage response complex	2|3	5	2.5	2	1|0|0|0|0|0|0|0|0|0|0|0|0|0|0|0|0|0|0|0|1|0|0|0|0|0|1|3|0|0|0|2|0|0|0|0|0|0|0|0|0|1|1|0	0.82
ETV3	P41162	ENSG00000117036	Ets	Q9H0A0	NAT10	RNA cytidine acetyltransferase (EC 2.3.1.-) (18S rRNA cytosine acetyltransferase) (N-acetyltransferase 10)	11		5|9	14	7	2	1|0|2|1|2|1|1|0|0|0|1|1|0|0|0|0|2|0|1|0|1|0|0|0|0|0|3|3|1|0|0|1|0|1|0|1|0|0|0|0|2|3|4|3	0.93
ETV3	P41162	ENSG00000117036	Ets	Q9BQ39	DDX50	ATP-dependent RNA helicase DDX50 (EC 3.6.4.13) (DEAD box protein 50) (Gu-beta) (Nucleolar protein Gu2)	10		4|3	7	3.5	2	0|0|0|0|0|0|4|0|0|0|0|0|0|0|0|0|0|0|0|0|0|0|0|0|0|0|2|2|0|0|0|0|0|0|0|0|0|0|0|0|0|0|3|0	0.9
ETV3	P41162	ENSG00000117036	Ets	O60216	RAD21	Double-strand-break repair protein rad21 homolog (hHR21) (Nuclear matrix protein 1) (NXP-1) (SCC1 homolog)	10	Cohesin-SA1 complex, Cohesin-SA2 complex, Cohesin-SA2 complex, Cohesin-SA1 complex, Cohesin-SA1 complex, Cohesin-SA2 complex, SNF2h-cohesin-NuRD complex, Sororin-cohesin complex, Sororin-cohesin complex, DDX11-RAD21-SMC1A-SMC3 complex	5|6	11	5.5	2	0|0|0|2|0|2|0|0|3|0|0|0|0|0|0|0|0|0|0|0|0|0|0|0|0|1|2|1|0|0|2|1|0|0|0|0|0|0|0|0|0|2|0|0	0.98
ETV3	P41162	ENSG00000117036	Ets	P31942	HNRH3	Heterogeneous nuclear ribonucleoprotein H3 (hnRNP H3) (Heterogeneous nuclear ribonucleoprotein 2H9) (hnRNP 2H9)	9		3|4	7	3.5	2	1|1|3|2|3|3|4|2|2|1|0|0|0|0|0|0|0|0|0|0|0|0|0|0|0|0|0|0|0|0|0|0|0|0|0|0|0|0|0|0|0|0|0|0	0.76
ETV3	P41162	ENSG00000117036	Ets	Q8N9T8	KRI1	Protein KRI1 homolog	9		3|3	6	3	2	0|1|2|0|3|0|0|0|1|0|0|0|0|0|0|0|0|0|0|0|0|0|0|0|0|0|0|2|0|0|0|0|0|0|0|0|0|0|0|0|0|1|0|0	0.89
ETV3	P41162	ENSG00000117036	Ets	Q14690	RRP5	Protein RRP5 homolog (NF-kappa-B-binding protein) (NFBP) (Programmed cell death protein 11)	8		7|4	11	5.5	2	1|0|2|1|1|2|0|0|1|1|0|0|0|0|0|0|0|0|0|0|0|0|0|0|0|0|0|0|0|0|0|3|0|0|0|0|0|1|1|0|2|0|1|1	0.97
ETV3	P41162	ENSG00000117036	Ets	Q9Y3D9	RT23	28S ribosomal protein S23, mitochondrial (MRP-S23) (S23mt) (Mitochondrial small ribosomal subunit protein mS23)	8	28S ribosomal subunit, mitochondrial, 55S ribosome, mitochondrial	2|3	5	2.5	2	0|0|0|0|0|2|0|1|0|0|0|0|0|0|0|0|0|0|0|0|0|0|0|0|0|0|0|1|0|0|0|0|0|0|0|0|0|0|0|0|1|0|1|2	0.89
ETV3	P41162	ENSG00000117036	Ets	Q12789	TF3C1	General transcription factor 3C polypeptide 1 (TF3C-alpha) (TFIIIC box B-binding subunit) (Transcription factor IIIC 220 kDa subunit) (TFIIIC 220 kDa subunit) (TFIIIC220) (Transcription factor IIIC subunit alpha)	8	transcription factor IIIC multisubunit complex, transcription factor IIIC multisubunit complex, TFIIIC containing-TOP1-SUB1 complex, 5S-DNA-TFIIIA-TFIIIC2 subcomplex, 5S-DNA-TFIIIA-TFIIIC2-TFIIIB subcomplex	9|14	23	11.5	2	4|6|5|7|8|5|2|4|6|5|1|0|0|0|0|2|0|0|0|0|0|0|0|1|0|0|5|6|1|1|4|6|0|0|0|1|0|0|0|0|3|2|2|3	0.86
ETV3	P41162	ENSG00000117036	Ets	Q9GZR2	REXO4	RNA exonuclease 4 (EC 3.1.-.-) (Exonuclease XPMC2) (Prevents mitotic catastrophe 2 protein homolog) (hPMC2)	7		3|2	5	2.5	2	0|0|0|0|0|0|0|0|0|0|0|0|0|0|0|0|0|0|0|0|0|0|0|0|0|0|3|4|0|1|1|1|1|0|0|0|0|0|0|0|0|0|1|2	0.74
ETV3	P41162	ENSG00000117036	Ets	Q9UIG0	BAZ1B	Tyrosine-protein kinase BAZ1B (EC 2.7.10.2) (Bromodomain adjacent to zinc finger domain protein 1B) (Williams syndrome transcription factor) (Williams-Beuren syndrome chromosomal region 10 protein) (Williams-Beuren syndrome chromosomal region 9 protein) (hWALp2)	6	WICH complex, WINAC complex, B-WICH complex, B-WICH complex	3|8	11	5.5	2	0|0|0|0|0|0|0|0|0|0|0|0|0|0|0|0|0|0|0|0|0|0|0|0|0|0|0|2|1|0|0|0|0|0|0|0|0|0|0|1|0|0|0|0	0.99
ETV3	P41162	ENSG00000117036	Ets	Q9H8H2	DDX31	Probable ATP-dependent RNA helicase DDX31 (EC 3.6.4.13) (DEAD box protein 31) (Helicain)	6		5|5	10	5	2	0|0|0|0|0|0|0|0|0|0|0|0|0|0|0|0|0|0|0|0|0|0|0|0|0|0|0|1|0|0|0|0|0|0|0|0|0|1|0|0|0|0|1|0	1
ETV3	P41162	ENSG00000117036	Ets	Q49A26	GLYR1	Putative oxidoreductase GLYR1 (EC 1.-.-.-) (3-hydroxyisobutyrate dehydrogenase-like protein) (Cytokine-like nuclear factor N-PAC) (Glyoxylate reductase 1 homolog) (Nuclear protein NP60) (Nuclear protein of 60 kDa)	5		9|10	19	9.5	2	6|5|6|6|8|5|4|4|3|4|2|1|2|0|1|0|0|1|1|1|1|0|0|0|0|0|1|3|1|0|0|1|0|0|0|2|1|2|0|2|5|9|2|2	0.8
ETV3	P41162	ENSG00000117036	Ets	Q13601	KRR1	KRR1 small subunit processome component homolog (HIV-1 Rev-binding protein 2) (KRR-R motif-containing protein 1) (Rev-interacting protein 1) (Rip-1)	5		2|3	5	2.5	2	0|0|0|0|0|0|0|0|1|0|0|0|0|0|0|0|0|0|0|0|0|0|0|0|0|0|0|2|0|0|0|0|0|0|0|0|0|1|0|0|2|2|1|0	0.84
ETV3	P41162	ENSG00000117036	Ets	P30101	PDIA3	Protein disulfide-isomerase A3 (EC 5.3.4.1) (58 kDa glucose-regulated protein) (58 kDa microsomal protein) (p58) (Disulfide isomerase ER-60) (Endoplasmic reticulum resident protein 57) (ER protein 57) (ERp57) (Endoplasmic reticulum resident protein 60) (ER protein 60) (ERp60)	5	HMGB1-HMGB2-HSC70-ERP60-GAPDH complex	2|3	5	2.5	2	0|0|0|0|0|0|0|0|0|0|0|0|0|0|0|0|0|0|0|0|0|0|0|1|0|0|0|0|0|0|0|0|0|0|0|0|0|0|1|2|0|0|0|0	0.96
ETV3	P41162	ENSG00000117036	Ets	Q96QE3	ATAD5	ATPase family AAA domain-containing protein 5 (Chromosome fragility-associated gene 1 protein)	4		3|4	7	3.5	2	0|0|0|0|0|0|0|0|0|0|0|0|0|0|0|0|0|0|0|0|0|0|0|0|0|0|1|2|0|0|0|0|0|0|0|1|0|0|0|0|0|0|0|0	0.99
ETV3	P41162	ENSG00000117036	Ets	Q9Y2R4	DDX52	Probable ATP-dependent RNA helicase DDX52 (EC 3.6.4.13) (ATP-dependent RNA helicase ROK1-like) (DEAD box protein 52)	4		2|3	5	2.5	2	0|0|2|0|4|0|0|0|0|0|0|0|0|0|0|0|0|0|0|0|0|0|0|0|0|0|0|0|0|0|1|0|0|0|0|0|0|0|0|0|2|0|1|2	0.78
ETV3	P41162	ENSG00000117036	Ets	Q13823	NOG2	Nucleolar GTP-binding protein 2 (Autoantigen NGP-1)	4		18|18	36	18	2	7|7|11|10|15|6|7|3|6|5|1|1|1|2|1|1|3|0|0|0|0|1|1|0|0|1|7|10|0|0|5|8|0|0|1|0|1|4|0|0|9|13|2|2	0.89
ETV3	P41162	ENSG00000117036	Ets	Q15397	PUM3	Pumilio homolog 3 (HBV X-transactivated gene 5 protein) (HBV XAg-transactivated protein 5) (Minor histocompatibility antigen HA-8) (HLA-HA8)	4		2|2	4	2	2	0|1|0|0|1|1|0|0|0|0|0|0|0|0|0|0|0|0|0|0|0|0|0|0|0|0|1|2|0|0|0|0|0|0|0|0|0|0|0|0|0|0|0|0	0.9
ETV3	P41162	ENSG00000117036	Ets	Q13206	DDX10	Probable ATP-dependent RNA helicase DDX10 (EC 3.6.4.13) (DEAD box protein 10)	3		11|10	21	10.5	2	4|4|1|0|7|3|1|1|4|3|0|0|0|0|0|0|0|0|0|0|0|0|0|0|1|1|12|15|0|0|5|6|0|1|0|2|0|1|0|0|8|6|1|3	0.8
ETV3	P41162	ENSG00000117036	Ets	P09429	HMGB1	High mobility group protein B1 (High mobility group protein 1) (HMG-1)	3	HMGB1-HMGB2-HSC70-ERP60-GAPDH complex, Casein kinase II-HMG1 complex	4|7	11	5.5	2	2|0|5|2|2|0|3|0|4|0|0|0|0|0|0|0|0|0|0|0|0|0|0|0|0|0|5|3|0|0|2|3|0|0|0|0|0|0|0|0|2|5|0|0	0.76
ETV3	P41162	ENSG00000117036	Ets	Q9Y4W2	LAS1L	Ribosomal biogenesis protein LAS1L (Protein LAS1 homolog)	3	MLL1-WDR5 complex, 5FMC (Friends of Methylated Chtop) complex, LAS1L-PELP1-TEX10-WDR18-NOL9-SENP3 complex	3|3	6	3	2	2|3|0|0|0|1|1|0|0|0|0|0|0|0|0|0|0|0|0|0|0|0|0|0|0|0|0|2|0|0|2|2|0|0|0|0|0|0|0|0|0|0|1|0	0.84
ETV3	P41162	ENSG00000117036	Ets	Q8WTT2	NOC3L	Nucleolar complex protein 3 homolog (NOC3 protein homolog) (Factor for adipocyte differentiation 24) (NOC3-like protein) (Nucleolar complex-associated protein 3-like protein)	3		16|19	35	17.5	2	7|3|5|5|11|7|3|1|4|2|8|6|3|3|4|4|6|0|3|5|6|5|1|2|0|1|10|18|3|1|3|3|0|1|4|3|4|4|1|4|5|13|9|5	0.83
ETV3	P41162	ENSG00000117036	Ets	P35251	RFC1	Replication factor C subunit 1 (Activator 1 140 kDa subunit) (A1 140 kDa subunit) (Activator 1 large subunit) (Activator 1 subunit 1) (DNA-binding protein PO-GA) (Replication factor C 140 kDa subunit) (RF-C 140 kDa subunit) (RFC140) (Replication factor C large subunit)	3	RFC complex, RFC complex, BASC complex (BRCA1-associated genome surveillance complex), BASC (Ab 80) complex (BRCA1-associated genome surveillance complex), BASC (Ab 81) complex (BRCA1-associated genome surveillance complex), RC complex (Replication competent complex), RC complex during S-phase of cell cycle, RC complex during G2/M-phase of cell cycle, DNA synthesome complex (13 subunits), DNA syn…	6|6	12	6	2	3|3|3|2|5|1|1|3|1|1|0|0|0|0|0|0|0|0|0|0|0|0|0|0|0|0|5|2|0|0|1|0|0|0|1|0|0|0|0|0|4|0|1|2	0.85
ETV3	P41162	ENSG00000117036	Ets	Q86V81	THOC4	THO complex subunit 4 (Tho4) (Ally of AML-1 and LEF-1) (Aly/REF export factor) (Transcriptional coactivator Aly/REF) (bZIP-enhancing factor BEF)	2	Spliceosome, TREX complex, Exon junction complex, Exon junction complex, C complex spliceosome, Splicing-associated factors complex	3|3	6	3	2	0|0|3|4|4|2|0|2|1|2|0|0|0|0|0|0|0|0|0|0|0|0|0|0|0|0|0|0|0|0|0|0|0|0|0|0|0|0|0|0|0|0|0|0	0.74
ETV3	P41162	ENSG00000117036	Ets	Q6ZMU1	C3P1	Putative protein C3P1	1		2|2	4	2	2	0|0|0|0|0|0|0|0|0|0|0|0|0|0|0|0|0|0|0|0|0|0|0|0|0|0|0|0|0|0|0|0|0|0|0|0|0|0|0|0|0|0|0|0	0.94
ETV3	P41162	ENSG00000117036	Ets	P41162	ETV3	ETS translocation variant 3 (ETS domain transcriptional repressor PE1) (PE-1) (Mitogenic Ets transcriptional suppressor)	1		16|23	39	19.5	2	0|0|0|0|0|0|0|0|0|0|0|0|0|0|0|0|0|0|0|0|0|0|0|0|0|0|0|0|0|0|0|0|0|0|0|0|0|0|0|0|0|0|0|0	1
ETV3	P41162	ENSG00000117036	Ets	P78316	NOP14	Nucleolar protein 14 (Nucleolar complex protein 14)	1		2|2	4	2	2	0|0|0|1|0|0|2|0|0|0|0|0|0|0|0|0|0|0|0|0|0|0|0|0|0|0|0|0|0|0|0|0|0|0|0|0|0|0|0|0|0|0|0|0	0.95
ETV3	P41162	ENSG00000117036	Ets	Q9P258	RCC2	Protein RCC2 (RCC1-like protein TD-60) (Telophase disk protein of 60 kDa)	1		7|9	16	8	2	6|9|2|3|1|1|8|3|6|6|0|0|1|1|0|0|0|0|0|0|0|0|0|0|1|0|3|2|1|1|6|4|0|0|0|0|0|0|0|0|1|3|0|1	0.76
ETV4	P43268	ENSG00000175832	Ets	Q8NHM5	KDM2B	Lysine-specific demethylase 2B (EC 1.14.11.27) (CXXC-type zinc finger protein 2) (F-box and leucine-rich repeat protein 10) (F-box protein FBL10) (F-box/LRR-repeat protein 10) (JmjC domain-containing histone demethylation protein 1B) (Jumonji domain-containing EMSY-interactor methyltransferase motif protein) (Protein JEMMA) (Protein-containing CXXC domain 2) ([Histone-H3]-lysine-36 demethylase 1B)	62	BCOR complex	6|5	11	5.5	2	1|3|1|0|4|2|2|2|4|2|0|0|0|0|0|0|1|0|0|1|1|0|0|0|0|0|5|5|0|0|0|0|0|0|0|0|0|0|0|0|2|1|0|0	0.81
ETV4	P43268	ENSG00000175832	Ets	O14686	KMT2D	Histone-lysine N-methyltransferase 2D (Lysine N-methyltransferase 2D) (EC 2.1.1.43) (ALL1-related protein) (Myeloid/lymphoid or mixed-lineage leukemia protein 2)	58	WDR5-ASH2L-RBBP5-MLL2 complex, ASCOM complex, MOF complex, UTX-MLL2/3 complex, PITX2-MLL4-ASH2L-RBBP5-PTIP complex, MLL2 complex, MLL4 complex	39|38	77	38.5	2	4|2|6|6|7|3|1|1|3|3|1|1|2|1|0|0|0|0|0|0|1|1|0|1|0|0|7|12|1|0|7|9|0|0|0|1|0|2|0|0|4|6|0|0	1	X				X	X
ETV4	P43268	ENSG00000175832	Ets	O15550	KDM6A	Lysine-specific demethylase 6A (EC 1.14.11.-) (Histone demethylase UTX) (Ubiquitously-transcribed TPR protein on the X chromosome) (Ubiquitously-transcribed X chromosome tetratricopeptide repeat protein)	53	UTX-MLL2/3 complex, PTIP-HMT complex, MLL3 complex, MLL4 complex	12|9	21	10.5	2	3|1|3|0|4|0|2|1|1|1|0|0|0|0|0|0|0|0|0|0|0|0|0|0|0|0|0|0|0|0|2|3|0|0|0|0|0|0|0|0|2|1|0|0	1
ETV4	P43268	ENSG00000175832	Ets	Q04724	TLE1	Transducin-like enhancer protein 1 (E(Sp1) homolog) (Enhancer of split groucho-like protein 1) (ESG1)	53	TLE1 corepressor complex (MASH1 promoter-corepressor complex), OCT1-OBF1-DNA-TLE1 complex, TLE1-TLE2 complex, TLE1 homodimer complex, TLE-Histone H3 complex, Hes1-TLE1 complex, TLE1 corepressor complex (MASH1 promoter-corepressor complex), NK-3-Groucho-HIPK2-SIN3A-RbpA48-HDAC1 complex, NK-3-Groucho complex, HESX1-TLE1 complex, CUL4B-DDB1-TLE1 complex, TBX20-TLE1 repressor complex	11|9	20	10	2	7|6|4|0|4|0|8|0|9|5|0|0|0|0|0|0|0|0|0|0|0|0|0|0|0|0|1|1|0|0|1|1|0|0|0|0|0|0|0|0|0|0|0|0	0.92
ETV4	P43268	ENSG00000175832	Ets	O15014	ZN609	Zinc finger protein 609	50		11|9	20	10	2	6|4|3|2|5|0|9|1|7|3|0|0|0|0|0|0|0|0|0|0|0|0|0|0|1|2|4|7|2|1|10|9|0|0|1|1|1|0|0|0|2|0|0|2	0.81
ETV4	P43268	ENSG00000175832	Ets	Q9Y618	NCOR2	Nuclear receptor corepressor 2 (N-CoR2) (CTG repeat protein 26) (SMAP270) (Silencing mediator of retinoic acid and thyroid hormone receptor) (SMRT) (T3 receptor-associating factor) (TRAC) (Thyroid-, retinoic-acid-receptor-associated corepressor)	48	SMRT complex, NCOR-SIN3-RPD3 complex, NCOR-SIN3-HDAC1 complex, SMRT core complex, SMRT core complex, NCOR2 complex, SMRT-SKIP-CBF1 complex, CBF1-HDAC1-SMRT complex, NCOR-SIN3-HDAC-HESX1 complex, HERP1/HEY2-NCOR-SIN3A complex	22|14	36	18	2	4|6|4|2|2|1|6|2|7|5|0|0|0|0|0|0|0|0|0|0|0|0|0|0|0|0|17|9|0|0|9|6|0|0|0|0|0|0|0|0|4|3|0|0	0.94
ETV4	P43268	ENSG00000175832	Ets	Q6ZW49	PAXI1	PAX-interacting protein 1 (PAX transactivation activation domain-interacting protein)	47	UTX-MLL2/3 complex, PTIP-HMT complex, PTIP-DNA damage response complex, PITX2-MLL4-ASH2L-RBBP5-PTIP complex, MLL3 complex, MLL4 complex	7|7	14	7	2	4|2|6|2|3|2|4|2|3|2|0|0|0|0|0|0|0|0|0|0|0|0|0|0|0|0|2|3|0|0|0|3|0|0|0|0|0|0|0|0|2|0|0|0	0.9
ETV4	P43268	ENSG00000175832	Ets	P51531	SMCA2	Probable global transcription activator SNF2L2 (EC 3.6.4.-) (ATP-dependent helicase SMARCA2) (BRG1-associated factor 190B) (BAF190B) (Protein brahma homolog) (hBRM) (SNF2-alpha) (SWI/SNF-related matrix-associated actin-dependent regulator of chromatin subfamily A member 2)	46	BAF complex, SWI-SNF chromatin remodeling-related-BRCA1 complex, BAF complex, Brm-associated complex, BRM-SIN3A complex, BRM-SIN3A-HDAC complex, BRM-associated complex, WINAC complex, BAF complex, BAF complex, ALL-1 supercomplex, RNA polymerase II complex (RPB1, RAP74, CDK8, CYCC, SRB7, BAF190, BAF47), chromatin structure modifying, RNA polymerase II complex, chromatin structure modifying, RNA po…	25|22	47	23.5	2	19|18|19|10|23|14|19|7|20|11|2|0|0|0|0|0|0|0|0|0|0|0|0|0|0|0|0|9|0|0|0|0|0|0|0|0|0|0|0|0|14|13|0|0	0.87
ETV4	P43268	ENSG00000175832	Ets	Q8NFD5	ARI1B	AT-rich interactive domain-containing protein 1B (ARID domain-containing protein 1B) (BRG1-associated factor 250b) (BAF250B) (BRG1-binding protein hELD/OSA1) (Osa homolog 2) (hOsa2) (p250R)	45	BAF complex, EBAFb complex, RSmad complex	21|19	40	20	2	12|14|5|3|10|4|9|2|9|3|0|0|0|0|0|0|1|0|0|0|0|0|0|0|1|0|12|19|0|2|4|8|0|0|1|0|0|0|0|0|1|1|0|0	0.93
ETV4	P43268	ENSG00000175832	Ets	Q92782	DPF1	Zinc finger protein neuro-d4 (BRG1-associated factor 45B) (BAF45B) (D4, zinc and double PHD fingers family 1)	45		6|6	12	6	2	0|0|2|0|0|0|0|0|0|0|0|0|0|0|0|0|0|0|0|0|0|0|0|0|0|0|0|0|0|0|0|1|0|0|0|0|0|0|0|0|0|0|0|0	1
ETV4	P43268	ENSG00000175832	Ets	Q92785	REQU	Zinc finger protein ubi-d4 (Apoptosis response zinc finger protein) (BRG1-associated factor 45D) (BAF45D) (D4, zinc and double PHD fingers family 2) (Protein requiem)	43	LARC complex (LCR-associated remodeling complex)	18|17	35	17.5	2	9|7|7|3|10|4|8|3|8|3|1|1|0|1|0|0|1|0|1|0|0|0|2|1|0|1|5|5|2|5|8|8|0|0|4|4|1|1|0|0|8|8|1|1	0.95
ETV4	P43268	ENSG00000175832	Ets	O14497	ARI1A	AT-rich interactive domain-containing protein 1A (ARID domain-containing protein 1A) (B120) (BRG1-associated factor 250) (BAF250) (BRG1-associated factor 250a) (BAF250A) (Osa homolog 1) (hOSA1) (SWI-like protein) (SWI/SNF complex protein p270) (SWI/SNF-related, matrix-associated, actin-dependent regulator of chromatin subfamily F member 1) (hELD)	42	NUMAC complex (nucleosomal methylation activator complex), BAF complex, SWI-SNF chromatin remodeling-related-BRCA1 complex, BAF complex, BAF complex, BAF complex, p300-CBP-p270-SWI/SNF complex, p300-CBP-p270 complex, Brg1-associated complex I, Brm-associated complex, BRG1-SIN3A complex, BRM-SIN3A complex, SIN3-ING1b complex II, LARC complex (LCR-associated remodeling complex), BRG1-SIN3A-HDAC con…	38|39	77	38.5	2	23|26|17|5|20|10|15|4|18|4|3|3|2|1|1|0|2|0|0|0|0|0|1|1|1|2|30|40|5|4|20|24|1|0|7|8|4|9|0|0|19|17|3|5	0.9
ETV4	P43268	ENSG00000175832	Ets	Q9BSM1	PCGF1	Polycomb group RING finger protein 1 (Nervous system Polycomb-1) (NSPc1) (RING finger protein 68)	42	BCOR complex	3|4	7	3.5	2	3|1|1|1|1|1|1|2|3|0|1|0|0|0|1|1|1|0|1|0|0|0|0|0|0|1|1|1|1|0|1|1|0|0|0|0|0|1|0|0|0|2|0|0	0.74
ETV4	P43268	ENSG00000175832	Ets	O00512	BCL9	B-cell CLL/lymphoma 9 protein (B-cell lymphoma 9 protein) (Bcl-9) (Protein legless homolog)	40	beta-catenin-B-cell lymphoma 9 protein complex	11|10	21	10.5	2	2|5|1|0|1|0|2|0|3|2|0|0|0|0|0|0|0|0|0|0|0|0|0|0|0|0|4|2|0|0|3|2|0|0|0|0|0|0|0|0|0|0|0|0	0.99
ETV4	P43268	ENSG00000175832	Ets	Q9ULL5	PRR12	Proline-rich protein 12	37		2|2	4	2	2	0|0|0|0|0|0|0|0|0|0|0|0|0|0|0|0|0|0|0|0|0|0|0|0|0|0|1|1|0|0|2|0|0|0|0|0|0|0|1|0|0|0|0|0	0.92
ETV4	P43268	ENSG00000175832	Ets	Q92925	SMRD2	SWI/SNF-related matrix-associated actin-dependent regulator of chromatin subfamily D member 2 (60 kDa BRG-1/Brm-associated factor subunit B) (BRG1-associated factor 60B) (BAF60B)	37	SWI-SNF chromatin remodeling-related-BRCA1 complex, PBAF complex (Polybromo- and BAF containing complex), BAF complex, BRG1-SIN3A complex, BRM-SIN3A complex, LARC complex (LCR-associated remodeling complex), BRM-SIN3A-HDAC complex, BRM-associated complex, EBAFb complex, EBAFa complex	13|15	28	14	2	8|8|7|6|5|5|6|0|4|6|2|1|1|2|2|2|1|0|1|2|1|1|1|1|1|0|5|9|2|2|4|6|0|1|3|0|2|2|0|0|8|8|4|3	0.91
ETV4	P43268	ENSG00000175832	Ets	Q09472	EP300	Histone acetyltransferase p300 (p300 HAT) (EC 2.3.1.48) (E1A-associated protein p300) (Histone butyryltransferase p300) (EC 2.3.1.-) (Histone crotonyltransferase p300) (EC 2.3.1.-) (Protein propionyltransferase p300) (EC 2.3.1.-)	35	Multisubunit ACTR coactivator complex, p300-MDM2-p53 protein complex, p300-CBP-p270-SWI/SNF complex, p300-CBP-p270 complex, p33ING1b-p300 complex, ING1-p300-PCNA complex, pRb2/p130-multimolecular complex (RB2, E2F5, HDAC1, SUV39H1, P300), p300-SMAD1-STAT3 complex, PIAS3-SMAD3-P300 complex, HES1 promoter corepressor complex, HES1 promoter-Notch enhancer complex, SMAD1-P300 complex, Smad1-Notch1-p3…	7|5	12	6	2	1|0|0|0|0|0|1|2|0|0|0|0|0|0|0|0|0|0|0|0|0|0|0|0|0|0|0|0|0|0|2|0|0|0|0|0|0|0|0|0|0|0|0|0	1	X			X	X	X
ETV4	P43268	ENSG00000175832	Ets	Q9Y6Q9	NCOA3	Nuclear receptor coactivator 3 (NCoA-3) (EC 2.3.1.48) (ACTR) (Amplified in breast cancer 1 protein) (AIB-1) (CBP-interacting protein) (pCIP) (Class E basic helix-loop-helix protein 42) (bHLHe42) (Receptor-associated coactivator 3) (RAC-3) (Steroid receptor coactivator protein 3) (SRC-3) (Thyroid hormone receptor activator molecule 1) (TRAM-1)	34	Multisubunit ACTR coactivator complex, ESR1-RELA-BCL3-NCOA3 complex, IKK-alpha--ER-alpha-AIB1 complex, SRC-3 complex, RSmad complex, MAK-ACTR-AR complex	5|6	11	5.5	2	2|2|0|0|0|0|0|0|0|0|0|0|0|0|0|0|0|0|0|0|0|0|0|0|0|0|1|2|0|0|3|2|0|0|0|0|1|0|0|0|0|0|0|0	0.98	X				X
ETV4	P43268	ENSG00000175832	Ets	O15164	TIF1A	Transcription intermediary factor 1-alpha (TIF1-alpha) (EC 2.3.2.27) (E3 ubiquitin-protein ligase TRIM24) (RING finger protein 82) (RING-type E3 ubiquitin transferase TIF1-alpha) (Tripartite motif-containing protein 24)	33		6|8	14	7	2	4|1|1|0|1|0|1|1|3|0|0|0|0|0|0|0|0|0|0|0|0|0|0|0|0|0|0|0|0|0|2|2|0|0|0|0|0|0|0|0|0|0|0|0	0.99
ETV4	P43268	ENSG00000175832	Ets	Q92793	CBP	CREB-binding protein (EC 2.3.1.48)	31	Multisubunit ACTR coactivator complex, p300-CBP-p270-SWI/SNF complex, p300-CBP-p270 complex, HES1 promoter corepressor complex, CREBBP-KAT2B-MYOD1 complex, SRC-3 complex, SRC-1 complex, RSmad complex, SMAD1-CBP complex, RNA polymerase II complex (CBP, PCAF, RPB1, BAF47, CYCC, CDK8), chromatin structure modifying, RNA polymerase II complex, incomplete (CBP, RPBI, PCAF, BAF47), chromatin structure …	6|4	10	5	2	0|3|0|0|0|0|0|0|4|0|0|0|0|0|1|1|1|0|0|0|0|0|0|0|0|0|0|0|0|0|0|1|0|0|0|0|0|0|0|0|0|0|0|0	0.96	X				X	X
ETV4	P43268	ENSG00000175832	Ets	O00763	ACACB	Acetyl-CoA carboxylase 2 (EC 6.4.1.2) (ACC-beta) [Includes: Biotin carboxylase (EC 6.3.4.14)]	22		31|33	64	32	2	0|0|23|23|22|19|0|0|0|0|19|0|0|0|0|22|0|0|16|0|21|0|0|0|0|0|0|0|0|0|0|0|0|0|13|5|0|0|40|32|32|21|21|18	0.75
ETV4	P43268	ENSG00000175832	Ets	Q15596	NCOA2	Nuclear receptor coactivator 2 (NCoA-2) (Class E basic helix-loop-helix protein 75) (bHLHe75) (Transcriptional intermediary factor 2) (hTIF2)	21	SRC-3 complex, SRC-1 complex	17|17	34	17	2	11|9|2|2|3|3|7|1|9|5|1|1|1|1|0|0|0|0|0|0|0|0|0|0|0|0|8|6|1|1|4|5|0|0|1|0|0|0|0|0|0|0|1|0	0.96	X				X
ETV4	P43268	ENSG00000175832	Ets	Q9BRJ6	CG050	Uncharacterized protein C7orf50	20		3|2	5	2.5	2	1|0|1|0|0|0|0|0|0|0|0|1|1|0|0|0|0|0|1|0|0|0|0|0|0|1|0|2|0|0|1|2|0|0|0|0|0|0|0|0|1|0|0|1	0.82
ETV4	P43268	ENSG00000175832	Ets	Q9BRQ0	PYGO2	Pygopus homolog 2	19		4|3	7	3.5	2	0|0|0|1|0|0|0|0|0|0|0|0|0|0|0|0|0|0|0|0|0|0|0|0|0|0|1|1|0|0|0|1|0|0|0|0|0|0|0|0|0|0|0|0	0.99
ETV4	P43268	ENSG00000175832	Ets	Q15532	SSXT	Protein SSXT (Protein SYT) (Synovial sarcoma translocated to X chromosome protein)	18		2|3	5	2.5	2	0|1|1|0|2|0|1|0|1|0|0|0|0|0|0|0|0|0|0|0|0|0|0|1|0|0|1|1|0|0|1|1|0|0|0|1|0|0|0|0|1|0|0|0	0.78	X				X
ETV4	P43268	ENSG00000175832	Ets	Q9HAV7	GRPE1	GrpE protein homolog 1, mitochondrial (HMGE) (Mt-GrpE#1)	14		7|4	11	5.5	2	0|0|1|1|3|1|1|0|0|0|0|0|0|1|0|0|0|0|0|1|0|1|1|0|0|0|0|0|0|0|0|0|0|1|0|0|0|0|0|0|0|0|0|1	0.99
ETV4	P43268	ENSG00000175832	Ets	Q9Y3B7	RM11	39S ribosomal protein L11, mitochondrial (L11mt) (MRP-L11) (Mitochondrial large ribosomal subunit protein uL11m)	14	55S ribosome, mitochondrial, 39S ribosomal subunit, mitochondrial	3|2	5	2.5	2	0|0|1|0|0|0|0|0|0|0|0|0|0|0|0|0|0|0|0|0|0|0|0|0|0|0|0|1|0|0|0|1|0|0|1|1|0|0|0|0|3|2|1|1	0.79
ETV4	P43268	ENSG00000175832	Ets	Q00059	TFAM	Transcription factor A, mitochondrial (mtTFA) (Mitochondrial transcription factor 1) (MtTF1) (Transcription factor 6) (TCF-6) (Transcription factor 6-like 2)	14		3|3	6	3	2	0|0|4|0|2|0|0|0|1|0|0|1|2|1|0|0|0|0|0|1|0|0|0|0|0|0|0|0|0|0|0|0|0|0|0|0|0|0|0|0|0|0|0|0	0.86
ETV4	P43268	ENSG00000175832	Ets	Q9BY77	PDIP3	Polymerase delta-interacting protein 3 (46 kDa DNA polymerase delta interaction protein) (p46) (S6K1 Aly/REF-like target) (SKAR)	13		9|6	15	7.5	2	0|0|0|0|0|0|0|0|0|0|0|0|0|0|1|0|0|0|1|1|0|1|0|0|0|0|0|2|0|0|0|0|0|0|0|0|0|0|0|0|0|0|0|0	1
ETV4	P43268	ENSG00000175832	Ets	P05141	ADT2	ADP/ATP translocase 2 (ADP,ATP carrier protein 2) (ADP,ATP carrier protein, fibroblast isoform) (Adenine nucleotide translocator 2) (ANT 2) (Solute carrier family 25 member 5) [Cleaved into: ADP/ATP translocase 2, N-terminally processed]	12	Nop56p-associated pre-rRNA complex, prohibitin 2 complex, mitochondrial	3|3	6	3	2	0|0|1|0|2|1|2|0|1|0|0|0|0|0|0|0|0|0|0|0|0|0|0|0|0|0|0|0|0|0|0|0|0|0|0|0|0|0|0|0|0|0|0|2	0.92
ETV4	P43268	ENSG00000175832	Ets	Q92841	DDX17	Probable ATP-dependent RNA helicase DDX17 (EC 3.6.4.13) (DEAD box protein 17) (DEAD box protein p72) (DEAD box protein p82) (RNA-dependent helicase p72)	11	Spliceosome, Large Drosha complex, DGCR8 multiprotein complex	4|6	10	5	2	0|0|0|0|0|0|5|2|0|0|0|0|0|0|0|0|0|0|0|2|0|0|0|0|0|0|3|2|0|0|4|2|0|0|0|0|0|0|0|0|0|0|0|0	0.89
ETV4	P43268	ENSG00000175832	Ets	Q96PK6	RBM14	RNA-binding protein 14 (Paraspeckle protein 2) (PSP2) (RNA-binding motif protein 14) (RRM-containing coactivator activator/modulator) (Synaptotagmin-interacting protein) (SYT-interacting protein)	11		8|7	15	7.5	2	0|0|0|0|0|0|0|0|0|0|0|0|0|0|0|0|0|0|0|0|0|0|0|0|0|0|2|4|0|0|0|0|0|0|0|0|0|0|0|0|0|0|0|0	1
ETV4	P43268	ENSG00000175832	Ets	P35232	PHB	Prohibitin	10	prohibitin 2 complex, mitochondrial	4|3	7	3.5	2	0|0|4|5|3|2|0|0|0|0|0|0|0|1|1|2|0|0|0|0|0|1|0|0|0|0|0|0|0|0|0|0|0|0|0|0|0|0|0|0|0|0|0|0	0.79
ETV4	P43268	ENSG00000175832	Ets	Q13011	ECH1	Delta(3,5)-Delta(2,4)-dienoyl-CoA isomerase, mitochondrial (EC 5.3.3.-)	9		8|7	15	7.5	2	1|1|1|1|3|4|2|1|0|0|0|0|0|1|0|0|0|0|0|0|0|0|0|0|0|0|0|0|0|0|1|0|2|0|2|1|5|1|6|7|6|1|7|7	0.79
ETV4	P43268	ENSG00000175832	Ets	Q9NPA3	M1IP1	Mid1-interacting protein 1 (Gastrulation-specific G12-like protein) (Mid1-interacting G12-like protein) (Protein STRAIT11499) (Spot 14-related protein) (S14R) (Spot 14-R)	9		3|3	6	3	2	0|0|0|0|0|2|0|0|0|0|0|0|0|0|1|0|0|0|1|2|0|0|0|0|0|0|0|0|0|0|0|0|0|0|1|0|0|0|3|4|1|0|1|2	0.74
ETV4	P43268	ENSG00000175832	Ets	O15027	SC16A	Protein transport protein Sec16A (SEC16 homolog A)	9	TNF-alpha/NF-kappa B signaling complex (SEC16A, CHUK, IKBKB, NFKB2, REL, IKBKG, MAP3K14, RELA, FBXW7, USP2)	31|24	55	27.5	2	2|2|17|7|10|9|4|1|3|2|3|2|3|1|3|5|5|0|4|4|4|3|4|3|2|1|1|1|6|3|3|2|8|5|15|11|12|10|18|22|13|9|14|14	0.88
ETV4	P43268	ENSG00000175832	Ets	Q01543	FLI1	Friend leukemia integration 1 transcription factor (Proto-oncogene Fli-1) (Transcription factor ERGB)	8	ELK1-SAP1a-EWS-FLI-FLI complex	3|3	6	3	2	0|0|0|0|0|0|0|0|0|0|0|0|0|0|0|0|0|0|0|0|0|0|0|0|0|0|0|0|0|0|0|0|0|0|0|0|0|0|0|0|0|0|0|0	0.99	X				X
ETV4	P43268	ENSG00000175832	Ets	Q8NF64	ZMIZ2	Zinc finger MIZ domain-containing protein 2 (PIAS-like protein Zimp7)	8		4|2	6	3	2	0|0|0|0|0|0|0|0|0|0|0|0|0|0|0|0|0|0|0|0|0|0|0|0|0|0|0|0|0|0|1|0|0|0|0|0|0|0|0|0|0|0|0|0	0.97
ETV4	P43268	ENSG00000175832	Ets	P13647	K2C5	Keratin, type II cytoskeletal 5 (58 kDa cytokeratin) (Cytokeratin-5) (CK-5) (Keratin-5) (K5) (Type-II keratin Kb5)	6		3|6	9	4.5	2	0|0|8|0|11|0|0|0|0|0|0|0|0|0|0|0|0|0|0|0|0|0|0|0|0|0|0|0|0|0|0|0|0|0|0|0|0|0|0|0|0|0|0|0	0.88	X				X
ETV4	P43268	ENSG00000175832	Ets	O15235	RT12	28S ribosomal protein S12, mitochondrial (MRP-S12) (S12mt) (MT-RPS12) (Mitochondrial small ribosomal subunit protein uS12m)	5	28S ribosomal subunit, mitochondrial, 55S ribosome, mitochondrial	2|2	4	2	2	0|0|0|0|0|0|0|0|0|0|0|0|0|0|0|0|0|0|0|0|0|0|0|0|0|0|0|0|0|0|0|0|0|0|0|0|0|0|0|0|0|0|0|0	0.94
ETV4	P43268	ENSG00000175832	Ets	Q92600	CNOT9	CCR4-NOT transcription complex subunit 9 (Cell differentiation protein RQCD1 homolog) (Rcd-1)	4	CCR4-NOT complex	3|2	5	2.5	2	0|0|0|0|0|0|0|0|0|0|0|0|0|0|0|0|1|0|0|0|0|0|0|0|0|0|0|0|0|0|0|0|0|1|0|0|0|1|2|1|0|0|1|1	0.92
ETV4	P43268	ENSG00000175832	Ets	Q13151	ROA0	Heterogeneous nuclear ribonucleoprotein A0 (hnRNP A0)	4		3|2	5	2.5	2	0|0|2|0|0|0|0|0|0|0|0|0|0|0|0|0|0|0|0|0|0|0|0|0|0|0|1|0|0|0|0|0|0|0|0|0|0|0|0|0|0|0|0|1	0.96
ETV4	P43268	ENSG00000175832	Ets	Q9ULJ6	ZMIZ1	Zinc finger MIZ domain-containing protein 1 (PIAS-like protein Zimp10) (Retinoic acid-induced protein 17)	3		8|4	12	6	2	0|0|0|0|0|0|0|0|0|0|0|0|0|0|0|0|0|0|0|0|0|0|0|0|0|0|0|0|0|0|0|0|0|0|0|0|0|0|0|0|0|0|0|0	1
ETV4	P43268	ENSG00000175832	Ets	Q8NHY2	COP1	E3 ubiquitin-protein ligase COP1 (EC 2.3.2.27) (Constitutive photomorphogenesis protein 1 homolog) (hCOP1) (RING finger and WD repeat domain protein 2) (RING finger protein 200) (RING-type E3 ubiquitin transferase RFWD2)	2	Ubiquitin E3 ligase (DET1, DDB1, CUL4A, RBX1, COP1)	8|3	11	5.5	2	0|0|0|0|0|0|0|0|0|0|0|0|0|0|0|0|0|0|0|0|0|0|0|0|0|0|0|0|0|0|0|0|0|0|0|0|0|0|0|0|0|0|0|0	1	X	X	X	X	X	X
ETV4	P43268	ENSG00000175832	Ets	P81605	DCD	Dermcidin (EC 3.4.-.-) (Preproteolysin) [Cleaved into: Survival-promoting peptide; DCD-1]	1		2|2	4	2	2	0|0|1|0|1|0|0|0|0|0|0|0|0|0|0|0|0|0|1|1|0|0|1|0|0|0|0|0|0|0|0|0|0|0|0|0|0|0|0|1|1|0|0|0	0.87
ETV4	P43268	ENSG00000175832	Ets	P43268	ETV4	ETS translocation variant 4 (Adenovirus E1A enhancer-binding protein) (E1A-F) (Polyomavirus enhancer activator 3 homolog) (Protein PEA3)	1		25|27	52	26	2	0|0|0|0|0|0|0|0|0|0|0|0|0|0|0|0|0|0|0|0|0|0|0|0|0|0|0|0|0|0|0|0|0|0|0|0|0|0|0|0|0|0|0|0	1
ETV5	P41161	ENSG00000244405	Ets	O14686	KMT2D	Histone-lysine N-methyltransferase 2D (Lysine N-methyltransferase 2D) (EC 2.1.1.43) (ALL1-related protein) (Myeloid/lymphoid or mixed-lineage leukemia protein 2)	58	WDR5-ASH2L-RBBP5-MLL2 complex, ASCOM complex, MOF complex, UTX-MLL2/3 complex, PITX2-MLL4-ASH2L-RBBP5-PTIP complex, MLL2 complex, MLL4 complex	7|10|21|52	90	22.5	4	4|2|6|6|7|3|1|1|3|3|1|1|2|1|0|0|0|0|0|0|1|1|0|1|0|0|7|12|1|0|7|9|0|0|0|1|0|2|0|0|4|6|0|0	0.82	X				X	X
ETV5	P41161	ENSG00000244405	Ets	O15550	KDM6A	Lysine-specific demethylase 6A (EC 1.14.11.-) (Histone demethylase UTX) (Ubiquitously-transcribed TPR protein on the X chromosome) (Ubiquitously-transcribed X chromosome tetratricopeptide repeat protein)	53	UTX-MLL2/3 complex, PTIP-HMT complex, MLL3 complex, MLL4 complex	3|3|10|17	33	8.25	4	3|1|3|0|4|0|2|1|1|1|0|0|0|0|0|0|0|0|0|0|0|0|0|0|0|0|0|0|0|0|2|3|0|0|0|0|0|0|0|0|2|1|0|0	0.83
ETV5	P41161	ENSG00000244405	Ets	Q92782	DPF1	Zinc finger protein neuro-d4 (BRG1-associated factor 45B) (BAF45B) (D4, zinc and double PHD fingers family 1)	45		2|3|7|7	19	4.75	4	0|0|2|0|0|0|0|0|0|0|0|0|0|0|0|0|0|0|0|0|0|0|0|0|0|0|0|0|0|0|0|1|0|0|0|0|0|0|0|0|0|0|0|0	0.99
ETV5	P41161	ENSG00000244405	Ets	Q09472	EP300	Histone acetyltransferase p300 (p300 HAT) (EC 2.3.1.48) (E1A-associated protein p300) (Histone butyryltransferase p300) (EC 2.3.1.-) (Histone crotonyltransferase p300) (EC 2.3.1.-) (Protein propionyltransferase p300) (EC 2.3.1.-)	35	Multisubunit ACTR coactivator complex, p300-MDM2-p53 protein complex, p300-CBP-p270-SWI/SNF complex, p300-CBP-p270 complex, p33ING1b-p300 complex, ING1-p300-PCNA complex, pRb2/p130-multimolecular complex (RB2, E2F5, HDAC1, SUV39H1, P300), p300-SMAD1-STAT3 complex, PIAS3-SMAD3-P300 complex, HES1 promoter corepressor complex, HES1 promoter-Notch enhancer complex, SMAD1-P300 complex, Smad1-Notch1-p3…	2|3|8|11	24	6	4	1|0|0|0|0|0|1|2|0|0|0|0|0|0|0|0|0|0|0|0|0|0|0|0|0|0|0|0|0|0|2|0|0|0|0|0|0|0|0|0|0|0|0|0	0.96	X				X	X
ETV5	P41161	ENSG00000244405	Ets	Q9HAV7	GRPE1	GrpE protein homolog 1, mitochondrial (HMGE) (Mt-GrpE#1)	14		2|3|4|7	16	4	4	0|0|1|1|3|1|1|0|0|0|0|0|0|1|0|0|0|0|0|1|0|1|1|0|0|0|0|0|0|0|0|0|0|1|0|0|0|0|0|0|0|0|0|1	0.89
ETV5	P41161	ENSG00000244405	Ets	Q13011	ECH1	Delta(3,5)-Delta(2,4)-dienoyl-CoA isomerase, mitochondrial (EC 5.3.3.-)	9		4|6|12|12	34	8.5	4	1|1|1|1|3|4|2|1|0|0|0|0|0|1|0|0|0|0|0|0|0|0|0|0|0|0|0|0|0|0|1|0|2|0|2|1|5|1|6|7|6|1|7|7	0.74
ETV5	P41161	ENSG00000244405	Ets	Q8NHY2	COP1	E3 ubiquitin-protein ligase COP1 (EC 2.3.2.27) (Constitutive photomorphogenesis protein 1 homolog) (hCOP1) (RING finger and WD repeat domain protein 2) (RING finger protein 200) (RING-type E3 ubiquitin transferase RFWD2)	2	Ubiquitin E3 ligase (DET1, DDB1, CUL4A, RBX1, COP1)	6|4|12|17	39	9.75	4	0|0|0|0|0|0|0|0|0|0|0|0|0|0|0|0|0|0|0|0|0|0|0|0|0|0|0|0|0|0|0|0|0|0|0|0|0|0|0|0|0|0|0|0	1	X	X	X	X	X	X
ETV5	P41161	ENSG00000244405	Ets	P41161	ETV5	ETS translocation variant 5 (Ets-related protein ERM)	1		6|4|21|29	60	15	4	0|0|0|0|0|0|0|0|0|0|0|0|0|0|0|0|0|0|0|0|0|0|0|0|0|0|0|0|0|0|0|0|0|0|0|0|0|0|0|0|0|0|0|0	1
ETV6	P41212	ENSG00000139083	Ets	O00763	ACACB	Acetyl-CoA carboxylase 2 (EC 6.4.1.2) (ACC-beta) [Includes: Biotin carboxylase (EC 6.3.4.14)]	22		35	35	35	1	0|0|23|23|22|19|0|0|0|0|19|0|0|0|0|22|0|0|16|0|21|0|0|0|0|0|0|0|0|0|0|0|0|0|13|5|0|0|40|32|32|21|21|18	0.84
ETV6	P41212	ENSG00000139083	Ets	Q9HAV7	GRPE1	GrpE protein homolog 1, mitochondrial (HMGE) (Mt-GrpE#1)	14		3	3	3	1	0|0|1|1|3|1|1|0|0|0|0|0|0|1|0|0|0|0|0|1|0|1|1|0|0|0|0|0|0|0|0|0|0|1|0|0|0|0|0|0|0|0|0|1	0.91
ETV6	P41212	ENSG00000139083	Ets	Q13011	ECH1	Delta(3,5)-Delta(2,4)-dienoyl-CoA isomerase, mitochondrial (EC 5.3.3.-)	9		8	8	8	1	1|1|1|1|3|4|2|1|0|0|0|0|0|1|0|0|0|0|0|0|0|0|0|0|0|0|0|0|0|0|1|0|2|0|2|1|5|1|6|7|6|1|7|7	0.82
ETV6	P41212	ENSG00000139083	Ets	Q9NPA3	M1IP1	Mid1-interacting protein 1 (Gastrulation-specific G12-like protein) (Mid1-interacting G12-like protein) (Protein STRAIT11499) (Spot 14-related protein) (S14R) (Spot 14-R)	9		3	3	3	1	0|0|0|0|0|2|0|0|0|0|0|0|0|0|1|0|0|0|1|2|0|0|0|0|0|0|0|0|0|0|0|0|0|0|1|0|0|0|3|4|1|0|1|2	0.74
ETV6	P41212	ENSG00000139083	Ets	O15027	SC16A	Protein transport protein Sec16A (SEC16 homolog A)	9	TNF-alpha/NF-kappa B signaling complex (SEC16A, CHUK, IKBKB, NFKB2, REL, IKBKG, MAP3K14, RELA, FBXW7, USP2)	32	32	32	1	2|2|17|7|10|9|4|1|3|2|3|2|3|1|3|5|5|0|4|4|4|3|4|3|2|1|1|1|6|3|3|2|8|5|15|11|12|10|18|22|13|9|14|14	0.97
ETV6	P41212	ENSG00000139083	Ets	Q9UBW7	ZMYM2	Zinc finger MYM-type protein 2 (Fused in myeloproliferative disorders protein) (Rearranged in atypical myeloproliferative disorder protein) (Zinc finger protein 198)	7	LSD1 complex, Anti-HDAC2 complex, anti-BHC110 complex, ZNF198-PML complex, ZNF198-SUMO1 complex, BHC110 complex	46	46	46	1	25|25|22|10|26|13|24|7|25|16|3|2|3|1|0|0|3|0|0|0|0|0|0|0|2|3|19|22|4|6|19|30|1|0|8|9|0|4|0|0|18|16|6|5	0.94	X				X
ETV6	P41212	ENSG00000139083	Ets	O75928	PIAS2	E3 SUMO-protein ligase PIAS2 (EC 2.3.2.-) (Androgen receptor-interacting protein 3) (ARIP3) (DAB2-interacting protein) (DIP) (E3 SUMO-protein transferase PIAS2) (Msx-interacting zinc finger protein) (Miz1) (PIAS-NY protein) (Protein inhibitor of activated STAT x) (Protein inhibitor of activated STAT2)	7		2	2	2	1	2|0|0|0|0|0|1|0|0|0|0|0|0|0|0|0|0|0|0|0|0|0|0|0|0|0|0|1|0|0|0|1|0|0|0|0|0|0|0|0|0|0|0|0	0.92
ETV6	P41212	ENSG00000139083	Ets	P61956	SUMO2	Small ubiquitin-related modifier 2 (SUMO-2) (HSMT3) (SMT3 homolog 2) (SUMO-3) (Sentrin-2) (Ubiquitin-like protein SMT3B) (Smt3B)	6		4	4	4	1	0|1|3|0|0|0|1|0|1|0|0|0|1|1|1|1|1|0|0|0|0|0|0|0|0|0|0|0|0|0|1|1|0|0|0|0|0|0|0|0|0|0|0|0	0.98	X			X
ETV6	P41212	ENSG00000139083	Ets	P57052	RBM11	Splicing regulator RBM11 (RNA-binding motif protein 11)	5		3	3	3	1	0|0|1|1|1|0|0|0|0|0|0|0|0|0|0|1|0|0|0|0|0|0|0|0|0|0|0|0|0|0|0|0|0|0|0|0|0|0|0|0|2|0|1|1	0.98
ETV6	P41212	ENSG00000139083	Ets	Q9Y5L4	TIM13	Mitochondrial import inner membrane translocase subunit Tim13	5	DDP1-TIM13 complex, mitochondrial	2	2	2	1	0|0|1|0|1|0|0|0|0|0|0|0|0|0|0|0|0|0|0|0|0|0|0|0|0|0|0|0|0|1|0|0|0|0|0|0|0|0|0|0|0|0|0|0	0.94
ETV6	P41212	ENSG00000139083	Ets	P0CG48	UBC	Polyubiquitin-C [Cleaved into: Ubiquitin]	4		3	3	3	1	0|0|0|0|0|0|0|0|0|0|0|0|0|0|0|0|0|0|0|0|0|0|0|0|0|0|0|0|0|0|0|0|0|0|0|0|0|0|0|7|0|0|0|0	0.96	X			X
ETV6	P41212	ENSG00000139083	Ets	O94986	CE152	Centrosomal protein of 152 kDa (Cep152)	4		3	3	3	1	0|0|0|0|0|0|0|0|0|0|0|0|0|0|0|0|0|0|0|0|0|0|0|0|0|0|0|0|1|0|0|0|0|2|1|0|0|1|0|0|0|0|1|0	0.98
ETV6	P41212	ENSG00000139083	Ets	Q6P2H3	CEP85	Centrosomal protein of 85 kDa (Cep85) (Coiled-coil domain-containing protein 21)	4		7	7	7	1	0|0|0|0|0|0|0|0|0|0|0|0|0|0|0|0|0|0|0|0|0|0|0|0|0|0|0|0|1|0|0|0|0|0|0|0|1|0|0|1|0|0|0|0	1
ETV6	P41212	ENSG00000139083	Ets	Q92600	CNOT9	CCR4-NOT transcription complex subunit 9 (Cell differentiation protein RQCD1 homolog) (Rcd-1)	4	CCR4-NOT complex	3	3	3	1	0|0|0|0|0|0|0|0|0|0|0|0|0|0|0|0|1|0|0|0|0|0|0|0|0|0|0|0|0|0|0|0|0|1|0|0|0|1|2|1|0|0|1|1	0.98
ETV6	P41212	ENSG00000139083	Ets	Q9UPQ9	TNR6B	Trinucleotide repeat-containing gene 6B protein	4		10	10	10	1	0|0|0|0|0|0|0|0|0|0|1|3|3|2|3|1|0|0|4|4|3|4|1|0|4|4|0|0|7|6|0|0|7|5|3|2|2|1|2|1|0|0|0|0	0.9
ETV6	P41212	ENSG00000139083	Ets	Q8TCU4	ALMS1	Alstrom syndrome protein 1	3	ACTN4-ALMS1 complex	13	13	13	1	0|0|0|0|0|0|0|0|0|0|1|0|0|0|3|1|4|0|1|0|0|0|0|0|0|0|0|0|2|2|0|0|1|3|1|1|0|0|2|3|0|0|0|1	1
ETV6	P41212	ENSG00000139083	Ets	P37198	NUP62	Nuclear pore glycoprotein p62 (62 kDa nucleoporin) (Nucleoporin Nup62)	3		14	14	14	1	4|1|1|3|2|1|2|1|1|3|4|1|1|2|2|4|5|0|2|4|2|3|1|1|4|3|2|1|1|3|0|1|4|5|1|1|0|1|5|7|0|0|0|2	1
ETV6	P41212	ENSG00000139083	Ets	Q15072	OZF	Zinc finger protein OZF (Only zinc finger protein) (Zinc finger protein 146)	3		3	3	3	1	0|0|1|0|1|0|2|0|0|0|0|0|0|0|0|0|0|0|0|0|0|0|0|0|0|0|1|1|0|0|3|1|0|1|0|0|1|1|0|0|0|0|0|0	0.89
ETV6	P41212	ENSG00000139083	Ets	P41212	ETV6	Transcription factor ETV6 (ETS translocation variant 6) (ETS-related protein Tel1) (Tel)	2		44	44	44	1	0|0|0|0|0|0|0|0|0|0|0|0|0|0|0|0|0|0|0|0|0|0|0|0|0|0|0|0|0|0|0|0|0|0|0|0|0|0|0|0|0|0|0|0	1	X		X
ETV6	P41212	ENSG00000139083	Ets	Q9BY89	K1671	Uncharacterized protein KIAA1671	2		4	4	4	1	0|0|0|0|0|0|0|0|0|0|0|1|0|0|2|0|3|1|1|2|1|0|0|0|0|0|0|0|2|2|0|0|2|3|2|2|3|1|2|1|0|0|1|0	0.78
ETV6	P41212	ENSG00000139083	Ets	Q8WUA2	PPIL4	Peptidyl-prolyl cis-trans isomerase-like 4 (PPIase) (EC 5.2.1.8) (Cyclophilin-like protein PPIL4) (Rotamase PPIL4)	2		14	14	14	1	11|8|6|4|7|1|9|4|10|4|1|0|1|0|2|1|1|0|2|0|0|0|1|0|1|1|3|2|0|0|4|4|0|1|0|2|2|0|0|0|2|2|2|2	0.92
ETV6	P41212	ENSG00000139083	Ets	Q9BQ87	TBL1Y	F-box-like/WD repeat-containing protein TBL1Y (Transducin beta-like protein 1Y) (Transducin-beta-like protein 1, Y-linked)	2	Emerin complex 32	9	9	9	1	0|0|0|0|0|0|0|0|0|0|0|0|0|0|0|0|0|0|0|0|0|0|0|0|0|0|0|0|0|3|0|0|0|0|0|0|0|0|0|0|0|0|0|0	1
ETV6	P41212	ENSG00000139083	Ets	Q9HCJ0	TNR6C	Trinucleotide repeat-containing gene 6C protein	2		4	4	4	1	0|0|0|0|0|0|0|0|0|0|0|0|0|0|0|1|0|0|0|1|0|0|0|0|1|1|0|0|3|1|0|0|1|2|0|0|0|0|0|0|0|0|1|0	0.97
ETV6	P41212	ENSG00000139083	Ets	Q15654	TRIP6	Thyroid receptor-interacting protein 6 (TR-interacting protein 6) (TRIP-6) (Opa-interacting protein 1) (OIP-1) (Zyxin-related protein 1) (ZRP-1)	2	LPAR2-TRIP6-NHERF2 complex, LPA stimulated	19	19	19	1	1|1|0|0|0|0|0|0|0|0|2|1|3|1|4|2|4|1|0|0|0|1|0|0|4|3|0|0|7|8|0|0|4|6|1|0|3|3|1|0|0|0|0|0	1
ETV6	P41212	ENSG00000139083	Ets	Q9H6R7	WDCP	WD repeat and coiled-coil-containing protein	2		48	48	48	1	0|0|0|0|0|0|0|0|0|0|0|0|0|1|3|1|2|0|0|0|0|1|0|0|0|0|0|0|2|0|0|0|1|1|1|2|1|0|1|2|0|0|0|3	1
ETV6	P41212	ENSG00000139083	Ets	Q13114	TRAF3	TNF receptor-associated factor 3 (EC 2.3.2.27) (CAP-1) (CD40 receptor-associated factor 1) (CRAF1) (CD40-binding protein) (CD40BP) (LMP1-associated protein 1) (LAP1) (RING-type E3 ubiquitin transferase TRAF3)	1	TANK-TRAF2-TRAF3 complex	5	5	5	1	0|0|0|0|0|0|0|0|0|0|0|0|0|0|0|0|0|0|0|0|0|0|0|0|0|0|0|0|0|0|0|0|0|0|0|0|0|0|0|0|0|0|0|0	1	X		X	X	X	X
ETV6	P41212	ENSG00000139083	Ets	P35658	NU214	Nuclear pore complex protein Nup214 (214 kDa nucleoporin) (Nucleoporin Nup214) (Protein CAN)	1	Nuclear pore complex	68	68	68	1	11|11|12|8|13|6|10|8|12|7|30|21|25|18|25|24|30|10|17|18|18|25|1|9|11|11|3|10|19|21|6|9|26|24|21|18|21|23|49|55|6|8|18|21	0.92	X				X
ETV6	P41212	ENSG00000139083	Ets	P52948	NUP98	Nuclear pore complex protein Nup98-Nup96 (EC 3.4.21.-) [Cleaved into: Nuclear pore complex protein Nup98 (98 kDa nucleoporin) (Nucleoporin Nup98) (Nup98); Nuclear pore complex protein Nup96 (96 kDa nucleoporin) (Nucleoporin Nup96) (Nup96)]	1	Nup 107-160 subcomplex, Nuclear pore complex, NPC subcomplex (NUP98, NUP107, NUP133, NUP160)	4	4	4	1	0|0|0|0|1|0|1|0|0|0|0|0|0|0|0|0|0|0|0|0|0|0|0|0|0|0|1|1|0|0|1|3|0|0|1|0|0|1|0|1|2|1|0|1	0.97	X				X
ETV6	P41212	ENSG00000139083	Ets	Q8TEP8	CE192	Centrosomal protein of 192 kDa (Cep192)	1		2	2	2	1	0|0|0|0|0|0|0|0|0|0|0|0|0|0|0|0|0|0|0|0|0|0|0|0|0|0|0|0|0|1|0|0|0|0|0|0|0|0|0|0|0|0|0|1	0.94
ETV6	P41212	ENSG00000139083	Ets	Q9NQC7	CYLD	Ubiquitin carboxyl-terminal hydrolase CYLD (EC 3.4.19.12) (Deubiquitinating enzyme CYLD) (Ubiquitin thioesterase CYLD) (Ubiquitin-specific-processing protease CYLD)	1	SPATA2-CYLD complex	9	9	9	1	0|0|0|0|0|0|0|0|0|0|0|0|0|0|1|0|0|0|0|0|0|0|0|0|2|2|0|0|0|0|0|0|0|0|0|0|0|1|0|0|0|0|1|2	1
ETV6	P41212	ENSG00000139083	Ets	Q9UGP4	LIMD1	LIM domain-containing protein 1	1		20	20	20	1	1|1|1|0|0|0|0|0|1|0|1|2|1|1|2|4|1|0|1|1|1|1|0|0|0|2|2|0|3|2|1|0|3|1|1|1|1|2|1|2|1|0|0|0	1
ETV6	P41212	ENSG00000139083	Ets	Q7Z3B4	NUP54	Nucleoporin p54 (54 kDa nucleoporin)	1		6	6	6	1	1|0|0|0|0|0|0|0|0|0|0|0|1|0|0|0|0|0|0|0|0|0|0|0|0|0|0|0|0|0|0|0|0|0|0|1|0|0|0|0|0|0|0|1	1
ETV6	P41212	ENSG00000139083	Ets	Q99567	NUP88	Nuclear pore complex protein Nup88 (88 kDa nucleoporin) (Nucleoporin Nup88)	1		32	32	32	1	3|3|4|1|4|1|1|1|6|1|11|5|4|5|8|9|13|6|12|9|11|8|0|1|7|5|0|1|6|4|2|2|5|8|4|2|6|6|20|25|1|0|6|5	0.98
ETV6	P41212	ENSG00000139083	Ets	A7KAX9	RHG32	Rho GTPase-activating protein 32 (Brain-specific Rho GTPase-activating protein) (GAB-associated Cdc42/Rac GTPase-activating protein) (GC-GAP) (GTPase regulator interacting with TrkA) (Rho-type GTPase-activating protein 32) (Rho/Cdc42/Rac GTPase-activating protein RICS) (RhoGAP involved in the beta-catenin-N-cadherin and NMDA receptor signaling) (p200RhoGAP) (p250GAP)	1		6	6	6	1	0|2|0|0|0|0|2|0|1|0|0|0|0|0|0|0|0|0|0|0|0|0|0|0|0|1|0|0|0|0|0|0|0|0|0|0|1|1|0|0|0|0|0|0	1
ETV6	P41212	ENSG00000139083	Ets	Q96C92	SDCG3	Serologically defined colon cancer antigen 3 (Antigen NY-CO-3)	1		4	4	4	1	0|0|0|0|0|0|0|0|0|0|0|0|0|0|0|0|0|0|0|0|0|0|0|0|0|0|0|0|0|0|0|0|0|0|0|0|0|0|0|0|0|0|0|0	1
ETV6	P41212	ENSG00000139083	Ets	P55735	SEC13	Protein SEC13 homolog (GATOR complex protein SEC13) (SEC13-like protein 1) (SEC13-related protein)	1	Nup 107-160 subcomplex, Nuclear pore complex, GATOR2 complex, GATOR complex, SOG complex	7	7	7	1	2|2|3|4|3|1|2|1|3|3|1|0|1|2|1|4|1|0|0|0|0|0|0|2|1|3|0|0|3|2|3|3|3|1|4|2|2|4|3|5|3|3|5|4	0.81
ETV6	P41212	ENSG00000139083	Ets	Q9UM82	SPAT2	Spermatogenesis-associated protein 2 (Spermatogenesis-associated protein PD1)	1	SPATA2-CYLD complex	7	7	7	1	0|0|0|0|0|0|0|0|0|0|0|0|1|0|0|0|0|0|0|0|0|0|0|0|0|0|0|0|0|0|0|0|0|1|0|0|1|0|0|0|0|0|0|0	1
ETV6	P41212	ENSG00000139083	Ets	Q8N5C8	TAB3	TGF-beta-activated kinase 1 and MAP3K7-binding protein 3 (Mitogen-activated protein kinase kinase kinase 7-interacting protein 3) (NF-kappa-B-activating protein 1) (TAK1-binding protein 3) (TAB-3) (TGF-beta-activated kinase 1-binding protein 3)	1	TNF-alpha/NF-kappa B signaling complex 7	2	2	2	1	0|1|0|0|0|0|0|0|0|0|0|0|0|0|0|0|0|0|0|0|0|0|0|0|0|0|0|0|1|0|0|0|1|0|0|0|0|0|0|0|0|0|0|0	0.94
ETV6	P41212	ENSG00000139083	Ets	O43592	XPOT	Exportin-T (Exportin(tRNA)) (tRNA exportin)	1		2	2	2	1	0|0|0|0|0|0|0|0|0|0|0|0|0|0|0|0|0|0|0|0|0|0|0|0|0|0|0|0|0|0|1|0|0|0|0|0|0|0|0|0|0|0|0|0	0.94
ETV7	Q9Y603	ENSG00000010030	Ets	Q8NHM5	KDM2B	Lysine-specific demethylase 2B (EC 1.14.11.27) (CXXC-type zinc finger protein 2) (F-box and leucine-rich repeat protein 10) (F-box protein FBL10) (F-box/LRR-repeat protein 10) (JmjC domain-containing histone demethylation protein 1B) (Jumonji domain-containing EMSY-interactor methyltransferase motif protein) (Protein JEMMA) (Protein-containing CXXC domain 2) ([Histone-H3]-lysine-36 demethylase 1B)	62	BCOR complex	11|7	18	9	2	1|3|1|0|4|2|2|2|4|2|0|0|0|0|0|0|1|0|0|1|1|0|0|0|0|0|5|5|0|0|0|0|0|0|0|0|0|0|0|0|2|1|0|0	0.95
ETV7	Q9Y603	ENSG00000010030	Ets	Q12857	NFIA	Nuclear factor 1 A-type (NF1-A) (Nuclear factor 1/A) (CCAAT-box-binding transcription factor) (CTF) (Nuclear factor I/A) (NF-I/A) (NFI-A) (TGGCA-binding protein)	54		5|6	11	5.5	2	4|2|3|0|0|0|3|0|3|0|0|0|1|0|0|0|0|0|0|0|0|0|0|0|0|0|1|0|0|3|3|0|0|0|0|0|0|0|0|0|0|1|0|0	0.91
ETV7	Q9Y603	ENSG00000010030	Ets	P15822	ZEP1	Zinc finger protein 40 (Cirhin interaction protein) (CIRIP) (Gate keeper of apoptosis-activating protein) (GAAP) (Human immunodeficiency virus type I enhancer-binding protein 1) (HIV-EP1) (Major histocompatibility complex-binding protein 1) (MBP-1) (Positive regulatory domain II-binding factor 1) (PRDII-BF1)	52		4|7	11	5.5	2	1|1|1|1|0|2|2|0|1|1|0|0|0|0|0|0|0|0|0|0|0|0|0|2|0|0|1|1|0|0|1|2|0|0|0|0|0|0|0|0|1|0|0|0	0.99	X				X	X
ETV7	Q9Y603	ENSG00000010030	Ets	Q9H582	ZN644	Zinc finger protein 644 (Zinc finger motif enhancer-binding protein 2) (Zep-2)	43		3|2	5	2.5	2	0|0|0|0|0|0|0|0|0|0|0|0|0|0|0|0|0|0|0|0|0|0|0|0|0|0|2|3|0|0|1|3|0|0|0|0|0|0|0|0|1|0|0|0	0.81
ETV7	Q9Y603	ENSG00000010030	Ets	Q9UPW6	SATB2	DNA-binding protein SATB2 (Special AT-rich sequence-binding protein 2)	42		6|6	12	6	2	0|5|3|2|4|2|0|0|7|3|0|0|0|0|0|0|0|0|0|0|0|0|0|0|0|2|4|2|0|0|0|0|0|0|0|0|2|1|0|0|0|3|0|0	0.82
ETV7	Q9Y603	ENSG00000010030	Ets	P0C7T5	ATX1L	Ataxin-1-like (Brother of ataxin-1) (Brother of ATXN1)	40		2|2	4	2	2	1|0|0|0|0|0|0|0|0|0|0|0|0|0|0|0|1|0|0|0|0|0|0|0|0|0|0|1|0|0|0|0|0|0|0|0|0|0|0|0|0|0|0|0	0.94
ETV7	Q9Y603	ENSG00000010030	Ets	Q9P2D1	CHD7	Chromodomain-helicase-DNA-binding protein 7 (CHD-7) (EC 3.6.4.12) (ATP-dependent helicase CHD7)	40		9|10	19	9.5	2	0|10|0|0|0|0|14|0|10|0|0|0|0|0|0|0|0|0|0|0|0|3|0|0|0|0|11|14|0|0|5|7|0|0|0|0|0|0|0|0|7|4|0|0	0.78
ETV7	Q9Y603	ENSG00000010030	Ets	Q96KQ7	EHMT2	Histone-lysine N-methyltransferase EHMT2 (EC 2.1.1.-) (EC 2.1.1.43) (Euchromatic histone-lysine N-methyltransferase 2) (HLA-B-associated transcript 8) (Histone H3-K9 methyltransferase 3) (H3-K9-HMTase 3) (Lysine N-methyltransferase 1C) (Protein G9a)	38	CtBP complex, CtBP core complex, DNMT1-G9a-PCNA complex, DNMT1-G9a complex, E2F-6 complex	6|7	13	6.5	2	3|3|2|0|0|3|2|1|6|4|0|0|0|0|0|0|1|0|0|0|0|0|1|1|0|1|9|8|0|0|1|3|0|0|0|0|0|0|0|0|0|2|0|0	0.77
ETV7	Q9Y603	ENSG00000010030	Ets	O00712	NFIB	Nuclear factor 1 B-type (NF1-B) (Nuclear factor 1/B) (CCAAT-box-binding transcription factor) (CTF) (Nuclear factor I/B) (NF-I/B) (NFI-B) (TGGCA-binding protein)	38		3|5	8	4	2	0|0|0|0|1|1|0|0|0|0|0|0|0|0|0|0|0|0|0|0|0|0|0|0|0|0|0|0|0|0|2|1|0|0|0|0|0|0|0|0|0|0|0|0	0.99
ETV7	Q9Y603	ENSG00000010030	Ets	P13056	NR2C1	Nuclear receptor subfamily 2 group C member 1 (Orphan nuclear receptor TR2) (Testicular receptor 2)	36		2|2	4	2	2	2|2|0|0|0|0|1|0|0|1|0|0|0|0|0|0|0|0|0|0|0|0|0|0|0|1|0|1|0|0|1|0|0|0|0|0|0|0|0|0|0|0|1|0	0.75
ETV7	Q9Y603	ENSG00000010030	Ets	Q8TE76	MORC4	MORC family CW-type zinc finger protein 4 (Zinc finger CW-type coiled-coil domain protein 2) (Zinc finger CW-type domain protein 4)	28		3|2	5	2.5	2	0|0|0|0|0|0|0|0|0|0|0|0|0|0|0|0|0|0|0|0|0|0|0|0|0|0|0|0|0|0|0|0|0|0|0|0|0|0|1|0|0|0|0|0	0.97
ETV7	Q9Y603	ENSG00000010030	Ets	P50219	MNX1	Motor neuron and pancreas homeobox protein 1 (Homeobox protein HB9)	19		2|3	5	2.5	2	0|0|0|0|0|0|0|0|1|0|0|0|0|0|0|0|0|0|0|0|0|0|0|0|0|0|0|0|0|0|0|0|0|0|0|0|0|0|0|0|0|0|0|0	0.97
ETV7	Q9Y603	ENSG00000010030	Ets	Q71UM5	RS27L	40S ribosomal protein S27-like (Small ribosomal subunit protein eS27-like)	13		2|2	4	2	2	0|0|3|0|0|0|0|0|0|0|0|0|0|0|0|0|0|0|0|0|0|0|0|0|0|0|0|0|0|0|0|0|0|0|0|0|0|0|0|0|0|0|2|2	0.86
ETV7	Q9Y603	ENSG00000010030	Ets	Q9H2Z4	NKX24	Homeobox protein Nkx-2.4 (Homeobox protein NK-2 homolog D)	7		3|2	5	2.5	2	0|0|0|0|0|0|0|0|0|0|0|0|0|0|0|0|0|0|0|0|0|0|0|0|0|0|0|0|0|0|0|0|0|0|0|0|0|0|0|0|0|0|0|0	0.97	X				X	X
ETV7	Q9Y603	ENSG00000010030	Ets	P54198	HIRA	Protein HIRA (TUP1-like enhancer of split protein 1)	7	Histone H3.3 complex, ASF1-interacting protein complex	3|2	5	2.5	2	0|0|0|0|0|0|0|0|0|0|0|0|0|0|0|0|0|0|0|0|0|0|0|0|0|0|1|0|0|0|0|1|0|0|0|0|0|0|0|0|0|0|0|0	0.97
ETV7	Q9Y603	ENSG00000010030	Ets	P57052	RBM11	Splicing regulator RBM11 (RNA-binding motif protein 11)	5		3|2	5	2.5	2	0|0|1|1|1|0|0|0|0|0|0|0|0|0|0|1|0|0|0|0|0|0|0|0|0|0|0|0|0|0|0|0|0|0|0|0|0|0|0|0|2|0|1|1	0.92
ETV7	Q9Y603	ENSG00000010030	Ets	Q92784	DPF3	Zinc finger protein DPF3 (BRG1-associated factor 45C) (BAF45C) (Zinc finger protein cer-d4)	3		2|2	4	2	2	0|0|0|0|0|0|0|0|0|0|0|0|0|0|0|0|0|0|0|0|0|0|0|0|0|0|0|0|0|0|0|0|0|0|0|0|0|0|0|0|0|0|0|0	0.94
ETV7	Q9Y603	ENSG00000010030	Ets	P41212	ETV6	Transcription factor ETV6 (ETS translocation variant 6) (ETS-related protein Tel1) (Tel)	2		3|3	6	3	2	0|0|0|0|0|0|0|0|0|0|0|0|0|0|0|0|0|0|0|0|0|0|0|0|0|0|0|0|0|0|0|0|0|0|0|0|0|0|0|0|0|0|0|0	0.99	X		X		X	X
ETV7	Q9Y603	ENSG00000010030	Ets	Q9Y603	ETV7	Transcription factor ETV7 (ETS translocation variant 7) (ETS-related protein Tel2) (Tel-related Ets factor) (Transcription factor Tel-2)	1		39|38	77	38.5	2	0|0|0|0|0|0|0|0|0|0|0|0|0|0|0|0|0|0|0|0|0|0|0|0|0|0|0|0|0|0|0|0|0|0|0|0|0|0|0|0|0|0|0|0	1
FEV	Q99581	ENSG00000163497	Ets	Q8NHM5	KDM2B	Lysine-specific demethylase 2B (EC 1.14.11.27) (CXXC-type zinc finger protein 2) (F-box and leucine-rich repeat protein 10) (F-box protein FBL10) (F-box/LRR-repeat protein 10) (JmjC domain-containing histone demethylation protein 1B) (Jumonji domain-containing EMSY-interactor methyltransferase motif protein) (Protein JEMMA) (Protein-containing CXXC domain 2) ([Histone-H3]-lysine-36 demethylase 1B)	62	BCOR complex	25|18	43	21.5	2	1|3|1|0|4|2|2|2|4|2|0|0|0|0|0|0|1|0|0|1|1|0|0|0|0|0|5|5|0|0|0|0|0|0|0|0|0|0|0|0|2|1|0|0	1
FEV	Q99581	ENSG00000163497	Ets	O14686	KMT2D	Histone-lysine N-methyltransferase 2D (Lysine N-methyltransferase 2D) (EC 2.1.1.43) (ALL1-related protein) (Myeloid/lymphoid or mixed-lineage leukemia protein 2)	58	WDR5-ASH2L-RBBP5-MLL2 complex, ASCOM complex, MOF complex, UTX-MLL2/3 complex, PITX2-MLL4-ASH2L-RBBP5-PTIP complex, MLL2 complex, MLL4 complex	62|41	103	51.5	2	4|2|6|6|7|3|1|1|3|3|1|1|2|1|0|0|0|0|0|0|1|1|0|1|0|0|7|12|1|0|7|9|0|0|0|1|0|2|0|0|4|6|0|0	1
FEV	Q99581	ENSG00000163497	Ets	Q12857	NFIA	Nuclear factor 1 A-type (NF1-A) (Nuclear factor 1/A) (CCAAT-box-binding transcription factor) (CTF) (Nuclear factor I/A) (NF-I/A) (NFI-A) (TGGCA-binding protein)	54		11|11	22	11	2	4|2|3|0|0|0|3|0|3|0|0|0|1|0|0|0|0|0|0|0|0|0|0|0|0|0|1|0|0|3|3|0|0|0|0|0|0|0|0|0|0|1|0|0	1
FEV	Q99581	ENSG00000163497	Ets	O15550	KDM6A	Lysine-specific demethylase 6A (EC 1.14.11.-) (Histone demethylase UTX) (Ubiquitously-transcribed TPR protein on the X chromosome) (Ubiquitously-transcribed X chromosome tetratricopeptide repeat protein)	53	UTX-MLL2/3 complex, PTIP-HMT complex, MLL3 complex, MLL4 complex	21|17	38	19	2	3|1|3|0|4|0|2|1|1|1|0|0|0|0|0|0|0|0|0|0|0|0|0|0|0|0|0|0|0|0|2|3|0|0|0|0|0|0|0|0|2|1|0|0	1
FEV	Q99581	ENSG00000163497	Ets	Q04724	TLE1	Transducin-like enhancer protein 1 (E(Sp1) homolog) (Enhancer of split groucho-like protein 1) (ESG1)	53	TLE1 corepressor complex (MASH1 promoter-corepressor complex), OCT1-OBF1-DNA-TLE1 complex, TLE1-TLE2 complex, TLE1 homodimer complex, TLE-Histone H3 complex, Hes1-TLE1 complex, TLE1 corepressor complex (MASH1 promoter-corepressor complex), NK-3-Groucho-HIPK2-SIN3A-RbpA48-HDAC1 complex, NK-3-Groucho complex, HESX1-TLE1 complex, CUL4B-DDB1-TLE1 complex, TBX20-TLE1 repressor complex	15|17	32	16	2	7|6|4|0|4|0|8|0|9|5|0|0|0|0|0|0|0|0|0|0|0|0|0|0|0|0|1|1|0|0|1|1|0|0|0|0|0|0|0|0|0|0|0|0	0.98
FEV	Q99581	ENSG00000163497	Ets	Q96RK0	CIC	Protein capicua homolog	52		29|34	63	31.5	2	13|9|7|5|9|4|13|3|10|7|1|0|0|0|2|1|0|1|0|0|0|0|0|1|0|2|13|15|2|1|5|5|0|0|3|2|0|2|0|0|8|3|1|0	0.99
FEV	Q99581	ENSG00000163497	Ets	P15822	ZEP1	Zinc finger protein 40 (Cirhin interaction protein) (CIRIP) (Gate keeper of apoptosis-activating protein) (GAAP) (Human immunodeficiency virus type I enhancer-binding protein 1) (HIV-EP1) (Major histocompatibility complex-binding protein 1) (MBP-1) (Positive regulatory domain II-binding factor 1) (PRDII-BF1)	52		21|16	37	18.5	2	1|1|1|1|0|2|2|0|1|1|0|0|0|0|0|0|0|0|0|0|0|0|0|2|0|0|1|1|0|0|1|2|0|0|0|0|0|0|0|0|1|0|0|0	1
FEV	Q99581	ENSG00000163497	Ets	Q9UHF7	TRPS1	Zinc finger transcription factor Trps1 (Tricho-rhino-phalangeal syndrome type I protein) (Zinc finger protein GC79)	50		26|22	48	24	2	0|0|3|0|1|0|0|0|0|0|0|1|0|1|0|0|0|0|0|0|0|0|0|0|0|0|6|7|0|1|2|4|0|0|0|0|0|0|0|0|0|0|0|0	1
FEV	Q99581	ENSG00000163497	Ets	O15014	ZN609	Zinc finger protein 609	50		23|25	48	24	2	6|4|3|2|5|0|9|1|7|3|0|0|0|0|0|0|0|0|0|0|0|0|0|0|1|2|4|7|2|1|10|9|0|0|1|1|1|0|0|0|2|0|0|2	0.99
FEV	Q99581	ENSG00000163497	Ets	Q6W2J9	BCOR	BCL-6 corepressor (BCoR)	48	BCOR complex	78|67	145	72.5	2	32|31|21|10|29|12|29|11|29|18|11|7|10|7|3|4|7|2|3|3|1|4|0|1|0|4|40|35|7|8|16|31|1|3|6|5|5|7|0|0|20|16|4|5	0.98
FEV	Q99581	ENSG00000163497	Ets	Q9Y618	NCOR2	Nuclear receptor corepressor 2 (N-CoR2) (CTG repeat protein 26) (SMAP270) (Silencing mediator of retinoic acid and thyroid hormone receptor) (SMRT) (T3 receptor-associating factor) (TRAC) (Thyroid-, retinoic-acid-receptor-associated corepressor)	48	SMRT complex, NCOR-SIN3-RPD3 complex, NCOR-SIN3-HDAC1 complex, SMRT core complex, SMRT core complex, NCOR2 complex, SMRT-SKIP-CBF1 complex, CBF1-HDAC1-SMRT complex, NCOR-SIN3-HDAC-HESX1 complex, HERP1/HEY2-NCOR-SIN3A complex	46|50	96	48	2	4|6|4|2|2|1|6|2|7|5|0|0|0|0|0|0|0|0|0|0|0|0|0|0|0|0|17|9|0|0|9|6|0|0|0|0|0|0|0|0|4|3|0|0	1
FEV	Q99581	ENSG00000163497	Ets	Q86U86	PB1	Protein polybromo-1 (hPB1) (BRG1-associated factor 180) (BAF180) (Polybromo-1D)	48	PBAF complex (Polybromo- and BAF containing complex), PBAF complex (Polybromo- and BAF containing complex), PBAF complex (Polybromo- and BAF containing complex), PBAF complex (Polybromo- and BAF containing complex), PBAF complex (Polybromo- and BAF containing complex)	27|17	44	22	2	6|2|12|8|14|10|2|3|4|2|1|1|0|0|2|0|5|0|0|0|0|0|0|1|1|0|2|3|0|0|1|6|0|0|0|4|0|2|0|0|14|24|8|4	0.91
FEV	Q99581	ENSG00000163497	Ets	Q6ZW49	PAXI1	PAX-interacting protein 1 (PAX transactivation activation domain-interacting protein)	47	UTX-MLL2/3 complex, PTIP-HMT complex, PTIP-DNA damage response complex, PITX2-MLL4-ASH2L-RBBP5-PTIP complex, MLL3 complex, MLL4 complex	11|12	23	11.5	2	4|2|6|2|3|2|4|2|3|2|0|0|0|0|0|0|0|0|0|0|0|0|0|0|0|0|2|3|0|0|0|3|0|0|0|0|0|0|0|0|2|0|0|0	0.99
FEV	Q99581	ENSG00000163497	Ets	Q4LE39	ARI4B	AT-rich interactive domain-containing protein 4B (ARID domain-containing protein 4B) (180 kDa Sin3-associated polypeptide) (Sin3-associated polypeptide p180) (Breast cancer-associated antigen BRCAA1) (Histone deacetylase complex subunit SAP180) (Retinoblastoma-binding protein 1-like 1)	46	SAP complex (Sin3-associated protein complex), SAP complex (Sin3-associated protein complex), SIN3-HDAC-SAP30-ARID4 complex, SIN3-SAP25 complex, SIN3-HDAC-SAP30-ARID4 complex, BRMS1-RBP1 complex, SIN3-HDAC-SAP30-ARID4 complex, SIN3-ING1b complex I, SIN3-ING1b complex II, SIN3-SAP25 complex	13|19	32	16	2	3|4|3|0|1|1|1|0|1|1|3|2|2|1|0|3|2|0|1|1|2|2|2|2|0|0|2|1|2|1|3|4|0|0|2|0|0|0|0|0|2|3|1|1	1
FEV	Q99581	ENSG00000163497	Ets	Q8NFD5	ARI1B	AT-rich interactive domain-containing protein 1B (ARID domain-containing protein 1B) (BRG1-associated factor 250b) (BAF250B) (BRG1-binding protein hELD/OSA1) (Osa homolog 2) (hOsa2) (p250R)	45	BAF complex, EBAFb complex, RSmad complex	35|31	66	33	2	12|14|5|3|10|4|9|2|9|3|0|0|0|0|0|0|1|0|0|0|0|0|0|0|1|0|12|19|0|2|4|8|0|0|1|0|0|0|0|0|1|1|0|0	0.99
FEV	Q99581	ENSG00000163497	Ets	Q92782	DPF1	Zinc finger protein neuro-d4 (BRG1-associated factor 45B) (BAF45B) (D4, zinc and double PHD fingers family 1)	45		5|4	9	4.5	2	0|0|2|0|0|0|0|0|0|0|0|0|0|0|0|0|0|0|0|0|0|0|0|0|0|0|0|0|0|0|0|1|0|0|0|0|0|0|0|0|0|0|0|0	1
FEV	Q99581	ENSG00000163497	Ets	Q9H582	ZN644	Zinc finger protein 644 (Zinc finger motif enhancer-binding protein 2) (Zep-2)	43		19|17	36	18	2	0|0|0|0|0|0|0|0|0|0|0|0|0|0|0|0|0|0|0|0|0|0|0|0|0|0|2|3|0|0|1|3|0|0|0|0|0|0|0|0|1|0|0|0	1	X				X	X
FEV	Q99581	ENSG00000163497	Ets	Q92785	REQU	Zinc finger protein ubi-d4 (Apoptosis response zinc finger protein) (BRG1-associated factor 45D) (BAF45D) (D4, zinc and double PHD fingers family 2) (Protein requiem)	43	LARC complex (LCR-associated remodeling complex)	16|15	31	15.5	2	9|7|7|3|10|4|8|3|8|3|1|1|0|1|0|0|1|0|1|0|0|0|2|1|0|1|5|5|2|5|8|8|0|0|4|4|1|1|0|0|8|8|1|1	0.91
FEV	Q99581	ENSG00000163497	Ets	O14497	ARI1A	AT-rich interactive domain-containing protein 1A (ARID domain-containing protein 1A) (B120) (BRG1-associated factor 250) (BAF250) (BRG1-associated factor 250a) (BAF250A) (Osa homolog 1) (hOSA1) (SWI-like protein) (SWI/SNF complex protein p270) (SWI/SNF-related, matrix-associated, actin-dependent regulator of chromatin subfamily F member 1) (hELD)	42	NUMAC complex (nucleosomal methylation activator complex), BAF complex, SWI-SNF chromatin remodeling-related-BRCA1 complex, BAF complex, BAF complex, BAF complex, p300-CBP-p270-SWI/SNF complex, p300-CBP-p270 complex, Brg1-associated complex I, Brm-associated complex, BRG1-SIN3A complex, BRM-SIN3A complex, SIN3-ING1b complex II, LARC complex (LCR-associated remodeling complex), BRG1-SIN3A-HDAC con…	56|57	113	56.5	2	23|26|17|5|20|10|15|4|18|4|3|3|2|1|1|0|2|0|0|0|0|0|1|1|1|2|30|40|5|4|20|24|1|0|7|8|4|9|0|0|19|17|3|5	0.97
FEV	Q99581	ENSG00000163497	Ets	Q9BSM1	PCGF1	Polycomb group RING finger protein 1 (Nervous system Polycomb-1) (NSPc1) (RING finger protein 68)	42	BCOR complex	8|4	12	6	2	3|1|1|1|1|1|1|2|3|0|1|0|0|0|1|1|1|0|1|0|0|0|0|0|0|1|1|1|1|0|1|1|0|0|0|0|0|1|0|0|0|2|0|0	0.93
FEV	Q99581	ENSG00000163497	Ets	Q9UPW6	SATB2	DNA-binding protein SATB2 (Special AT-rich sequence-binding protein 2)	42		14|14	28	14	2	0|5|3|2|4|2|0|0|7|3|0|0|0|0|0|0|0|0|0|0|0|0|0|0|0|2|4|2|0|0|0|0|0|0|0|0|2|1|0|0|0|3|0|0	0.99
FEV	Q99581	ENSG00000163497	Ets	Q08117	AES	Amino-terminal enhancer of split (Amino enhancer of split) (Gp130-associated protein GAM) (Grg-5) (Groucho-related protein 5) (Protein ESP1) (Protein GRG)	41		6|6	12	6	2	0|2|2|0|1|0|0|0|0|1|0|0|0|0|0|0|0|0|0|0|0|0|0|0|0|0|2|1|0|0|2|2|0|0|1|0|0|0|0|0|0|0|0|0	1
FEV	Q99581	ENSG00000163497	Ets	P0C7T5	ATX1L	Ataxin-1-like (Brother of ataxin-1) (Brother of ATXN1)	40		15|9	24	12	2	1|0|0|0|0|0|0|0|0|0|0|0|0|0|0|0|1|0|0|0|0|0|0|0|0|0|0|1|0|0|0|0|0|0|0|0|0|0|0|0|0|0|0|0	1
FEV	Q99581	ENSG00000163497	Ets	O00512	BCL9	B-cell CLL/lymphoma 9 protein (B-cell lymphoma 9 protein) (Bcl-9) (Protein legless homolog)	40	beta-catenin-B-cell lymphoma 9 protein complex	14|16	30	15	2	2|5|1|0|1|0|2|0|3|2|0|0|0|0|0|0|0|0|0|0|0|0|0|0|0|0|4|2|0|0|3|2|0|0|0|0|0|0|0|0|0|0|0|0	1
FEV	Q99581	ENSG00000163497	Ets	Q9NPI1	BRD7	Bromodomain-containing protein 7 (75 kDa bromodomain protein) (Protein CELTIX-1)	40		10|7	17	8.5	2	0|0|1|1|1|0|1|0|0|0|0|0|0|0|0|0|0|0|0|0|0|0|0|0|0|0|0|1|0|0|0|3|0|0|0|1|0|0|0|0|1|2|0|2	1
FEV	Q99581	ENSG00000163497	Ets	Q9P2D1	CHD7	Chromodomain-helicase-DNA-binding protein 7 (CHD-7) (EC 3.6.4.12) (ATP-dependent helicase CHD7)	40		25|23	48	24	2	0|10|0|0|0|0|14|0|10|0|0|0|0|0|0|0|0|0|0|0|0|3|0|0|0|0|11|14|0|0|5|7|0|0|0|0|0|0|0|0|7|4|0|0	0.98
FEV	Q99581	ENSG00000163497	Ets	Q68CP9	ARID2	AT-rich interactive domain-containing protein 2 (ARID domain-containing protein 2) (BRG1-associated factor 200) (BAF200) (Zinc finger protein with activation potential) (Zipzap/p200)	39	PBAF complex (Polybromo- and BAF containing complex), PBAF complex (Polybromo- and BAF containing complex), PBAF complex (Polybromo- and BAF containing complex), PBAF complex (Polybromo- and BAF containing complex), PBAF complex (Polybromo- and BAF containing complex)	11|8	19	9.5	2	0|1|3|2|3|2|0|0|0|0|1|0|0|0|0|0|1|0|1|0|1|0|0|0|0|0|5|5|0|1|1|4|0|0|0|1|0|0|0|0|6|6|0|1	0.94	X				X	X
FEV	Q99581	ENSG00000163497	Ets	Q8NEZ4	KMT2C	Histone-lysine N-methyltransferase 2C (Lysine N-methyltransferase 2C) (EC 2.1.1.43) (Homologous to ALR protein) (Myeloid/lymphoid or mixed-lineage leukemia protein 3)	39	ASCOM complex, UTX-MLL2/3 complex, PTIP-HMT complex, MLL3 complex	17|10	27	13.5	2	1|0|0|0|1|1|0|0|0|1|0|0|0|0|0|0|0|0|0|0|0|0|0|0|0|0|0|1|0|0|0|0|0|0|0|0|0|0|0|0|0|0|0|0	1
FEV	Q99581	ENSG00000163497	Ets	Q96KQ7	EHMT2	Histone-lysine N-methyltransferase EHMT2 (EC 2.1.1.-) (EC 2.1.1.43) (Euchromatic histone-lysine N-methyltransferase 2) (HLA-B-associated transcript 8) (Histone H3-K9 methyltransferase 3) (H3-K9-HMTase 3) (Lysine N-methyltransferase 1C) (Protein G9a)	38	CtBP complex, CtBP core complex, DNMT1-G9a-PCNA complex, DNMT1-G9a complex, E2F-6 complex	30|23	53	26.5	2	3|3|2|0|0|3|2|1|6|4|0|0|0|0|0|0|1|0|0|0|0|0|1|1|0|1|9|8|0|0|1|3|0|0|0|0|0|0|0|0|0|2|0|0	1
FEV	Q99581	ENSG00000163497	Ets	Q14687	GSE1	Genetic suppressor element 1	38	Anti-HDAC2 complex, anti-BHC110 complex, BHC110 complex	36|35	71	35.5	2	20|20|22|11|25|15|19|13|17|12|2|1|1|1|1|0|0|1|0|0|0|0|0|0|1|1|15|13|3|1|10|9|1|0|2|1|2|2|0|0|12|4|1|2	0.94
FEV	Q99581	ENSG00000163497	Ets	O00712	NFIB	Nuclear factor 1 B-type (NF1-B) (Nuclear factor 1/B) (CCAAT-box-binding transcription factor) (CTF) (Nuclear factor I/B) (NF-I/B) (NFI-B) (TGGCA-binding protein)	38		8|8	16	8	2	0|0|0|0|1|1|0|0|0|0|0|0|0|0|0|0|0|0|0|0|0|0|0|0|0|0|0|0|0|0|2|1|0|0|0|0|0|0|0|0|0|0|0|0	1
FEV	Q99581	ENSG00000163497	Ets	Q99856	ARI3A	AT-rich interactive domain-containing protein 3A (ARID domain-containing protein 3A) (B-cell regulator of IgH transcription) (Bright) (Dead ringer-like protein 1) (E2F-binding protein 1)	37		14|20	34	17	2	12|11|6|6|13|11|6|5|7|6|1|1|0|0|1|0|1|0|1|1|1|1|1|2|2|1|6|5|2|1|6|4|0|0|1|2|0|0|0|0|10|5|2|0	0.88
FEV	Q99581	ENSG00000163497	Ets	Q4VC05	BCL7A	B-cell CLL/lymphoma 7 protein family member A	37		3|2	5	2.5	2	2|2|0|0|0|0|0|0|0|0|0|0|0|0|0|0|0|0|0|0|0|0|0|0|0|0|0|0|0|0|0|0|0|0|0|0|1|1|0|0|1|1|0|1	0.85
FEV	Q99581	ENSG00000163497	Ets	O75376	NCOR1	Nuclear receptor corepressor 1 (N-CoR) (N-CoR1)	37	NCOR complex, NCOR-HDAC3 complex, NCOR1 complex, NCOR2 complex, Kaiso-NCOR complex, SKI-NCOR1-SIN3A-HDAC1 complex, SMAD2-SKI-NCOR complex, SMAD3-SKI-NCOR complex, SMAD4-SKI-NCOR complex	53|46	99	49.5	2	16|19|24|11|26|13|20|11|22|11|4|2|5|1|8|3|1|0|1|2|3|1|1|2|1|2|30|31|4|4|16|20|0|0|5|3|2|4|0|0|26|18|3|2	0.96
FEV	Q99581	ENSG00000163497	Ets	Q9ULL5	PRR12	Proline-rich protein 12	37		14|15	29	14.5	2	0|0|0|0|0|0|0|0|0|0|0|0|0|0|0|0|0|0|0|0|0|0|0|0|0|0|1|1|0|0|2|0|0|0|0|0|0|0|1|0|0|0|0|0	1
FEV	Q99581	ENSG00000163497	Ets	Q92925	SMRD2	SWI/SNF-related matrix-associated actin-dependent regulator of chromatin subfamily D member 2 (60 kDa BRG-1/Brm-associated factor subunit B) (BRG1-associated factor 60B) (BAF60B)	37	SWI-SNF chromatin remodeling-related-BRCA1 complex, PBAF complex (Polybromo- and BAF containing complex), BAF complex, BRG1-SIN3A complex, BRM-SIN3A complex, LARC complex (LCR-associated remodeling complex), BRM-SIN3A-HDAC complex, BRM-associated complex, EBAFb complex, EBAFa complex	16|11	27	13.5	2	8|8|7|6|5|5|6|0|4|6|2|1|1|2|2|2|1|0|1|2|1|1|1|1|1|0|5|9|2|2|4|6|0|1|3|0|2|2|0|0|8|8|4|3	0.83
FEV	Q99581	ENSG00000163497	Ets	Q9Y2X9	ZN281	Zinc finger protein 281 (GC-box-binding zinc finger protein 1) (Transcription factor ZBP-99) (Zinc finger DNA-binding protein 99)	37	UTX-MLL2/3 complex	24|26	50	25	2	8|5|3|3|4|5|4|3|6|3|0|0|0|0|0|0|1|0|0|1|1|0|0|0|0|0|8|6|0|0|4|7|0|0|0|0|1|0|0|0|3|1|0|0	1
FEV	Q99581	ENSG00000163497	Ets	P13056	NR2C1	Nuclear receptor subfamily 2 group C member 1 (Orphan nuclear receptor TR2) (Testicular receptor 2)	36		15|10	25	12.5	2	2|2|0|0|0|0|1|0|0|1|0|0|0|0|0|0|0|0|0|0|0|0|0|0|0|1|0|1|0|0|1|0|0|0|0|0|0|0|0|0|0|0|1|0	1
FEV	Q99581	ENSG00000163497	Ets	Q04726	TLE3	Transducin-like enhancer protein 3 (Enhancer of split groucho-like protein 3) (ESG3)	36	CUL4B-DDB1-TLE3 complex, TBX20-TLE3 repressor complex	32|34	66	33	2	15|13|12|10|8|6|15|10|17|12|3|0|2|2|3|2|3|0|1|2|0|0|2|1|3|1|3|3|4|4|13|8|2|0|4|1|7|6|0|0|10|6|6|7	0.99
FEV	Q99581	ENSG00000163497	Ets	Q9H334	FOXP1	Forkhead box protein P1 (Mac-1-regulated forkhead) (MFH)	35		21|20	41	20.5	2	1|2|0|0|0|0|1|0|0|0|0|0|0|0|0|0|0|0|0|0|0|0|0|0|0|0|1|2|0|0|2|1|0|0|0|0|0|0|0|0|0|0|0|0	1	X				X	X
FEV	Q99581	ENSG00000163497	Ets	Q09472	EP300	Histone acetyltransferase p300 (p300 HAT) (EC 2.3.1.48) (E1A-associated protein p300) (Histone butyryltransferase p300) (EC 2.3.1.-) (Histone crotonyltransferase p300) (EC 2.3.1.-) (Protein propionyltransferase p300) (EC 2.3.1.-)	35	Multisubunit ACTR coactivator complex, p300-MDM2-p53 protein complex, p300-CBP-p270-SWI/SNF complex, p300-CBP-p270 complex, p33ING1b-p300 complex, ING1-p300-PCNA complex, pRb2/p130-multimolecular complex (RB2, E2F5, HDAC1, SUV39H1, P300), p300-SMAD1-STAT3 complex, PIAS3-SMAD3-P300 complex, HES1 promoter corepressor complex, HES1 promoter-Notch enhancer complex, SMAD1-P300 complex, Smad1-Notch1-p3…	14|8	22	11	2	1|0|0|0|0|0|1|2|0|0|0|0|0|0|0|0|0|0|0|0|0|0|0|0|0|0|0|0|0|0|2|0|0|0|0|0|0|0|0|0|0|0|0|0	1
FEV	Q99581	ENSG00000163497	Ets	Q8IWI9	MGAP	MAX gene-associated protein (MAX dimerization protein 5)	35	E2F-6 complex	46|35	81	40.5	2	2|1|4|0|4|0|2|0|2|0|1|2|2|1|1|0|1|0|1|1|0|0|0|0|0|0|11|10|0|1|8|11|0|0|0|2|0|3|0|0|4|8|0|0	1
FEV	Q99581	ENSG00000163497	Ets	Q9ULD9	ZN608	Zinc finger protein 608 (Renal carcinoma antigen NY-REN-36)	35		16|14	30	15	2	2|1|0|0|0|1|2|0|2|1|0|0|0|0|0|0|0|0|0|0|0|0|0|0|0|1|2|2|0|0|2|1|0|0|0|0|0|0|0|0|1|0|0|0	1
FEV	Q99581	ENSG00000163497	Ets	P54253	ATX1	Ataxin-1 (Spinocerebellar ataxia type 1 protein)	34		10|6	16	8	2	1|1|1|0|0|0|0|0|0|0|0|0|0|0|0|0|0|0|0|0|0|0|0|0|0|0|0|1|0|0|0|0|0|0|0|0|0|0|0|0|0|1|0|0	1
FEV	Q99581	ENSG00000163497	Ets	Q9H9B1	EHMT1	Histone-lysine N-methyltransferase EHMT1 (EC 2.1.1.-) (EC 2.1.1.43) (Euchromatic histone-lysine N-methyltransferase 1) (Eu-HMTase1) (G9a-like protein 1) (GLP) (GLP1) (Histone H3-K9 methyltransferase 5) (H3-K9-HMTase 5) (Lysine N-methyltransferase 1D)	34	CtBP complex, CtBP core complex, E2F-6 complex	28|29	57	28.5	2	7|6|1|0|4|0|9|1|8|4|0|0|0|0|0|0|0|0|0|0|0|0|0|0|1|0|6|9|1|0|5|10|0|0|0|0|1|0|0|0|0|2|0|0	1
FEV	Q99581	ENSG00000163497	Ets	Q9Y6Q9	NCOA3	Nuclear receptor coactivator 3 (NCoA-3) (EC 2.3.1.48) (ACTR) (Amplified in breast cancer 1 protein) (AIB-1) (CBP-interacting protein) (pCIP) (Class E basic helix-loop-helix protein 42) (bHLHe42) (Receptor-associated coactivator 3) (RAC-3) (Steroid receptor coactivator protein 3) (SRC-3) (Thyroid hormone receptor activator molecule 1) (TRAM-1)	34	Multisubunit ACTR coactivator complex, ESR1-RELA-BCL3-NCOA3 complex, IKK-alpha--ER-alpha-AIB1 complex, SRC-3 complex, RSmad complex, MAK-ACTR-AR complex	9|12	21	10.5	2	2|2|0|0|0|0|0|0|0|0|0|0|0|0|0|0|0|0|0|0|0|0|0|0|0|0|1|2|0|0|3|2|0|0|0|0|1|0|0|0|0|0|0|0	1
FEV	Q99581	ENSG00000163497	Ets	O15164	TIF1A	Transcription intermediary factor 1-alpha (TIF1-alpha) (EC 2.3.2.27) (E3 ubiquitin-protein ligase TRIM24) (RING finger protein 82) (RING-type E3 ubiquitin transferase TIF1-alpha) (Tripartite motif-containing protein 24)	33		8|6	14	7	2	4|1|1|0|1|0|1|1|3|0|0|0|0|0|0|0|0|0|0|0|0|0|0|0|0|0|0|0|0|0|2|2|0|0|0|0|0|0|0|0|0|0|0|0	0.99
FEV	Q99581	ENSG00000163497	Ets	O95785	WIZ	Protein Wiz (Widely-interspaced zinc finger-containing protein) (Zinc finger protein 803)	33		20|18	38	19	2	8|10|3|3|3|5|9|2|10|2|0|0|0|0|0|0|0|0|0|0|0|0|0|0|0|0|11|6|0|0|6|9|0|0|0|0|1|1|0|0|1|4|0|0	0.96
FEV	Q99581	ENSG00000163497	Ets	Q8IVH2	FOXP4	Forkhead box protein P4 (Fork head-related protein-like A)	32		12|14	26	13	2	0|1|0|0|0|0|0|0|0|0|0|0|0|0|0|0|0|0|0|0|0|0|0|0|0|0|1|0|0|0|2|0|0|0|0|0|0|0|0|0|0|0|0|0	1	X				X	X
FEV	Q99581	ENSG00000163497	Ets	Q6PJG2	EMSA1	ELM2 and SANT domain-containing protein 1 (MIDEAS)	32	MiDAC complex	12|14	26	13	2	0|0|0|0|0|0|0|0|0|0|0|1|0|0|1|0|1|0|3|1|1|2|1|1|0|0|0|0|0|0|0|0|0|0|0|0|0|0|0|0|0|0|0|0	1
FEV	Q99581	ENSG00000163497	Ets	Q92793	CBP	CREB-binding protein (EC 2.3.1.48)	31	Multisubunit ACTR coactivator complex, p300-CBP-p270-SWI/SNF complex, p300-CBP-p270 complex, HES1 promoter corepressor complex, CREBBP-KAT2B-MYOD1 complex, SRC-3 complex, SRC-1 complex, RSmad complex, SMAD1-CBP complex, RNA polymerase II complex (CBP, PCAF, RPB1, BAF47, CYCC, CDK8), chromatin structure modifying, RNA polymerase II complex, incomplete (CBP, RPBI, PCAF, BAF47), chromatin structure …	10|9	19	9.5	2	0|3|0|0|0|0|0|0|4|0|0|0|0|0|1|1|1|0|0|0|0|0|0|0|0|0|0|0|0|0|0|1|0|0|0|0|0|0|0|0|0|0|0|0	1
FEV	Q99581	ENSG00000163497	Ets	Q86UP3	ZFHX4	Zinc finger homeobox protein 4 (Zinc finger homeodomain protein 4) (ZFH-4)	31		28|25	53	26.5	2	0|0|1|0|1|0|0|0|0|0|2|2|2|1|0|0|0|0|0|0|0|0|0|0|0|0|1|3|1|0|1|2|0|0|0|0|1|0|0|0|0|0|0|0	1
FEV	Q99581	ENSG00000163497	Ets	Q9NQB0	TF7L2	Transcription factor 7-like 2 (HMG box transcription factor 4) (T-cell-specific transcription factor 4) (T-cell factor 4) (TCF-4) (hTCF-4)	30	Bipartite complex (TFC4, CTNNB1)	8|8	16	8	2	2|0|0|0|0|0|0|0|0|0|0|0|0|0|0|0|0|0|0|0|0|0|0|0|0|0|0|0|0|0|0|0|0|0|0|0|0|0|0|0|0|0|0|0	1
FEV	Q99581	ENSG00000163497	Ets	Q5PSV4	BRM1L	Breast cancer metastasis-suppressor 1-like protein (BRMS1-homolog protein p40) (BRMS1-like protein p40)	29	ING2 complex	8|4	12	6	2	2|5|2|1|2|5|1|0|1|1|0|0|0|0|0|0|1|0|0|0|0|0|0|0|0|0|2|4|0|0|0|0|0|0|1|1|1|1|0|0|3|5|2|2	0.76
FEV	Q99581	ENSG00000163497	Ets	Q9NP66	HM20A	High mobility group protein 20A (HMG box-containing protein 20A) (HMG domain-containing protein 1) (HMG domain-containing protein HMGX1)	29	LSD1 complex	10|7	17	8.5	2	2|2|2|1|3|1|2|3|2|2|0|0|0|0|0|0|0|0|0|0|0|0|0|0|0|0|2|2|0|0|0|2|0|0|0|0|0|1|0|0|1|1|0|0	1
FEV	Q99581	ENSG00000163497	Ets	Q7Z3K3	POGZ	Pogo transposable element with ZNF domain (Suppressor of hairy wing homolog 5) (Zinc finger protein 280E) (Zinc finger protein 635)	29		8|10	18	9	2	1|1|2|0|2|0|0|0|1|2|1|1|1|1|0|0|0|0|0|0|0|0|0|0|0|0|2|4|1|0|0|1|0|0|0|0|0|0|0|0|2|2|0|0	1
FEV	Q99581	ENSG00000163497	Ets	Q96L91	EP400	E1A-binding protein p400 (EC 3.6.4.-) (CAG repeat protein 32) (Domino homolog) (hDomino) (Trinucleotide repeat-containing gene 12 protein) (p400 kDa SWI2/SNF2-related protein)	28	NuA4/Tip60 HAT complex, NuA4/Tip60 HAT complex, NuA4/Tip60-HAT complex A, DMAP1-associated complex, p400-associated complex, NuA4/Tip60 HAT complex, NuA4/Tip60 HAT complex	19|14	33	16.5	2	1|5|7|5|7|4|4|1|2|3|4|2|1|1|2|2|2|0|2|2|2|2|1|2|0|0|7|15|1|0|1|9|0|0|1|1|0|1|0|0|13|10|3|1	0.9
FEV	Q99581	ENSG00000163497	Ets	Q86U70	LDB1	LIM domain-binding protein 1 (LDB-1) (Carboxyl-terminal LIM domain-binding protein 2) (CLIM-2) (LIM domain-binding factor CLIM2) (hLdb1) (Nuclear LIM interactor)	28	E-box sequence-binding complex, Rb-tal-1-E2A-Lmo2-Ldb1 complex, LMO4-BRCA1-CTIP-LDB1 complex	5|4	9	4.5	2	0|0|0|0|0|0|0|0|0|0|0|0|0|0|0|0|0|0|0|0|0|0|0|0|0|0|0|0|0|0|0|0|0|0|0|0|0|0|0|0|0|0|0|0	1
FEV	Q99581	ENSG00000163497	Ets	Q8TE76	MORC4	MORC family CW-type zinc finger protein 4 (Zinc finger CW-type coiled-coil domain protein 2) (Zinc finger CW-type domain protein 4)	28		5|3	8	4	2	0|0|0|0|0|0|0|0|0|0|0|0|0|0|0|0|0|0|0|0|0|0|0|0|0|0|0|0|0|0|0|0|0|0|0|0|0|0|1|0|0|0|0|0	0.99
FEV	Q99581	ENSG00000163497	Ets	Q12948	FOXC1	Forkhead box protein C1 (Forkhead-related protein FKHL7) (Forkhead-related transcription factor 3) (FREAC-3)	26		5|3	8	4	2	3|4|0|0|0|0|0|0|0|0|0|0|0|0|0|0|0|0|0|0|0|0|0|0|0|0|1|1|0|0|2|2|0|0|0|0|0|1|0|0|1|0|0|0	0.88	X				X	X
FEV	Q99581	ENSG00000163497	Ets	O75461	E2F6	Transcription factor E2F6 (E2F-6)	26	E2F-6 complex, MLL1-WDR5 complex	4|4	8	4	2	0|1|0|1|0|0|1|0|1|1|0|0|0|0|0|0|0|0|0|0|0|0|0|0|0|0|2|1|0|0|0|2|0|0|0|0|0|0|0|0|0|1|0|0	0.99
FEV	Q99581	ENSG00000163497	Ets	Q9HCM7	FBSL	Fibrosin-1-like protein (AUTS2-like protein) (HBV X-transactivated gene 9 protein) (HBV XAg-transactivated protein 9)	26		5|6	11	5.5	2	0|1|0|0|0|0|2|0|0|0|0|0|0|0|0|0|0|0|0|0|0|0|0|0|0|0|0|0|0|0|0|0|0|0|0|0|0|0|0|0|0|0|0|0	1
FEV	Q99581	ENSG00000163497	Ets	Q01826	SATB1	DNA-binding protein SATB1 (Special AT-rich sequence-binding protein 1)	26		11|12	23	11.5	2	8|5|3|0|0|0|6|3|6|3|1|1|1|0|0|1|0|0|0|0|0|0|0|0|0|0|3|2|0|0|6|2|0|0|0|0|0|0|0|0|5|3|0|0	0.94
FEV	Q99581	ENSG00000163497	Ets	Q969R5	LMBL2	Lethal(3)malignant brain tumor-like protein 2 (H-l(3)mbt-like protein 2) (L(3)mbt-like protein 2)	25	E2F-6 complex	8|3	11	5.5	2	0|0|0|0|0|0|0|0|0|0|0|0|0|0|0|0|0|0|0|0|0|0|0|0|0|0|1|2|0|0|0|0|0|0|0|0|0|0|0|0|0|0|0|0	1
FEV	Q99581	ENSG00000163497	Ets	Q6KC79	NIPBL	Nipped-B-like protein (Delangin) (SCC2 homolog)	25		8|6	14	7	2	0|0|0|0|0|0|0|0|0|0|0|0|0|0|0|0|0|0|0|0|0|0|0|1|0|0|2|4|0|0|3|4|0|0|0|0|0|0|0|0|2|0|0|0	0.97
FEV	Q99581	ENSG00000163497	Ets	Q06587	RING1	E3 ubiquitin-protein ligase RING1 (EC 2.3.2.27) (Polycomb complex protein RING1) (RING finger protein 1) (RING-type E3 ubiquitin transferase RING1) (Really interesting new gene 1 protein)	25	Polycomb repressive complex 1 (PRC1, hPRC-H), Polycomb repressive complex 1 (PRC1, hPRC-H), CEN complex, BCOR complex, E2F-6 complex, hPRC1L complex, RBP-Jkappa-RING1-KyoT2 complex, Polycomb repressive complex	9|12	21	10.5	2	9|11|3|0|0|0|10|2|7|5|0|0|0|0|2|1|1|0|1|2|0|2|0|0|1|0|2|4|0|0|0|6|0|0|2|0|0|3|0|0|3|3|0|0	0.83
FEV	Q99581	ENSG00000163497	Ets	O60315	ZEB2	Zinc finger E-box-binding homeobox 2 (Smad-interacting protein 1) (SMADIP1) (Zinc finger homeobox protein 1b)	25	CtBP complex, ZEB2-KDM1A complex	8|10	18	9	2	0|0|0|0|0|0|0|0|0|0|0|0|0|0|0|0|0|0|0|0|0|0|0|0|0|0|0|0|0|0|0|0|0|0|0|0|0|0|0|0|0|0|0|0	1
FEV	Q99581	ENSG00000163497	Ets	Q9UQR1	ZN148	Zinc finger protein 148 (Transcription factor ZBP-89) (Zinc finger DNA-binding protein 89)	25		22|15	37	18.5	2	0|2|1|0|0|0|1|1|1|1|0|0|0|0|1|0|0|0|0|0|0|0|0|0|0|0|2|1|0|0|1|4|0|0|0|0|0|0|0|0|0|1|0|0	1
FEV	Q99581	ENSG00000163497	Ets	P85037	FOXK1	Forkhead box protein K1 (Myocyte nuclear factor) (MNF)	24		3|3	6	3	2	1|1|0|0|0|0|0|0|1|0|0|0|0|0|0|0|0|0|0|0|0|0|0|0|0|0|1|0|0|0|0|0|0|0|0|0|0|0|0|0|0|0|0|0	0.99	X				X	X
FEV	Q99581	ENSG00000163497	Ets	P49116	NR2C2	Nuclear receptor subfamily 2 group C member 2 (Orphan nuclear receptor TAK1) (Orphan nuclear receptor TR4) (Testicular receptor 4)	24		10|10	20	10	2	0|0|0|0|0|0|0|0|0|0|0|0|0|1|0|0|0|0|0|0|0|0|0|0|0|0|1|1|0|0|0|0|0|0|0|0|0|0|0|0|0|0|0|0	1
FEV	Q99581	ENSG00000163497	Ets	Q9H147	TDIF1	Deoxynucleotidyltransferase terminal-interacting protein 1 (Terminal deoxynucleotidyltransferase-interacting factor 1) (TdIF1) (TdT-interacting factor 1)	24	MiDAC complex, DNTTIP1-ZNF541-HDAC1-HDAC2 complex	8|7	15	7.5	2	0|0|0|0|0|0|0|0|0|0|0|0|0|0|0|0|0|0|0|0|0|0|0|0|0|0|0|2|0|0|0|0|0|0|0|0|0|0|0|0|0|0|0|0	1
FEV	Q99581	ENSG00000163497	Ets	P39880	CUX1	Homeobox protein cut-like 1 (CCAAT displacement protein) (CDP) (Homeobox protein cux-1)	23		34|30	64	32	2	12|15|12|10|21|12|15|8|16|11|0|0|0|0|0|0|1|1|0|0|0|0|0|0|0|2|14|19|2|0|7|12|0|0|2|3|0|5|0|0|10|12|0|0	0.95
FEV	Q99581	ENSG00000163497	Ets	Q9HAH7	FBRS	Probable fibrosin-1	23		3|2	5	2.5	2	1|0|0|0|0|0|0|0|1|0|0|0|0|0|0|0|0|0|0|0|0|0|0|0|0|0|1|1|0|0|1|1|0|0|0|0|0|0|0|0|0|0|0|0	0.94
FEV	Q99581	ENSG00000163497	Ets	Q15906	VPS72	Vacuolar protein sorting-associated protein 72 homolog (Protein YL-1) (Transcription factor-like 1)	23	SRCAP-associated chromatin remodeling complex, NuA4/Tip60 HAT complex, DMAP1-associated complex	5|2	7	3.5	2	2|1|0|0|2|0|0|0|1|0|0|0|0|0|0|0|0|0|0|0|0|0|0|0|0|0|1|2|0|0|0|2|0|0|0|0|0|0|0|0|1|2|0|0	0.81
FEV	Q99581	ENSG00000163497	Ets	Q9Y6X8	ZHX2	Zinc fingers and homeoboxes protein 2 (Alpha-fetoprotein regulator 1) (AFP regulator 1) (Regulator of AFP) (Zinc finger and homeodomain protein 2)	23		13|11	24	12	2	2|3|0|0|0|0|3|0|3|3|0|0|0|0|0|0|0|0|0|0|0|0|0|0|0|0|1|1|0|0|1|1|0|0|0|0|0|0|0|0|0|0|0|0	1
FEV	Q99581	ENSG00000163497	Ets	Q92560	BAP1	Ubiquitin carboxyl-terminal hydrolase BAP1 (EC 3.4.19.12) (BRCA1-associated protein 1) (Cerebral protein 6)	22		4|4	8	4	2	1|1|1|2|0|0|1|0|1|0|0|0|0|0|0|1|0|0|0|0|0|0|0|0|0|0|2|3|0|0|0|0|0|0|0|0|0|0|0|0|1|1|0|0	0.96
FEV	Q99581	ENSG00000163497	Ets	Q6MZP7	LIN54	Protein lin-54 homolog (CXC domain-containing protein 1)	22	LINC complex, S-phase, LINC core complex, LINC complex, quiescent cells	17|14	31	15.5	2	8|7|4|1|2|2|4|1|9|4|0|1|0|0|0|0|1|0|0|0|0|0|0|0|0|0|11|5|1|1|9|9|1|0|2|2|1|0|0|0|7|4|0|2	0.93
FEV	Q99581	ENSG00000163497	Ets	Q96QT6	PHF12	PHD finger protein 12 (PHD factor 1) (Pf1)	22		15|10	25	12.5	2	1|0|2|0|3|1|2|0|1|0|1|3|2|0|3|1|1|0|1|1|1|1|0|0|0|0|0|5|0|0|0|3|0|0|0|0|0|0|0|0|2|3|0|0	1
FEV	Q99581	ENSG00000163497	Ets	Q2KHR3	QSER1	Glutamine and serine-rich protein 1	22		8|14	22	11	2	3|4|2|2|0|0|0|0|2|2|0|0|0|0|0|1|0|0|0|0|0|0|0|0|0|0|4|2|0|1|3|4|0|0|0|0|0|0|0|0|1|1|0|0	0.99
FEV	Q99581	ENSG00000163497	Ets	Q9BWW4	SSBP3	Single-stranded DNA-binding protein 3 (Sequence-specific single-stranded-DNA-binding protein)	22		2|2	4	2	2	0|1|0|0|0|0|0|0|0|0|0|0|0|0|0|0|0|0|0|0|1|0|0|0|0|0|0|0|0|0|0|0|0|0|0|0|0|0|0|0|0|0|0|0	0.94
FEV	Q99581	ENSG00000163497	Ets	Q7Z589	EMSY	BRCA2-interacting transcriptional repressor EMSY	21	NIF-1-DBC1-EMSY complex	19|11	30	15	2	3|3|6|2|4|3|4|2|3|3|0|0|0|0|4|0|3|0|2|1|2|1|1|1|0|0|10|14|0|1|2|6|1|0|1|1|0|1|0|0|6|5|2|1	0.9
FEV	Q99581	ENSG00000163497	Ets	Q15596	NCOA2	Nuclear receptor coactivator 2 (NCoA-2) (Class E basic helix-loop-helix protein 75) (bHLHe75) (Transcriptional intermediary factor 2) (hTIF2)	21	SRC-3 complex, SRC-1 complex	10|11	21	10.5	2	11|9|2|2|3|3|7|1|9|5|1|1|1|1|0|0|0|0|0|0|0|0|0|0|0|0|8|6|1|1|4|5|0|0|1|0|0|0|0|0|0|0|1|0	0.83
FEV	Q99581	ENSG00000163497	Ets	Q8WUB8	PHF10	PHD finger protein 10 (BRG1-associated factor 45a) (BAF45a) (XAP135)	21		7|6	13	6.5	2	2|1|0|0|0|1|1|1|2|1|0|0|1|0|1|0|0|0|1|0|0|0|0|0|0|0|1|2|0|0|2|2|0|0|0|0|0|0|0|0|2|5|1|0	0.97
FEV	Q99581	ENSG00000163497	Ets	P25490	TYY1	Transcriptional repressor protein YY1 (Delta transcription factor) (INO80 complex subunit S) (NF-E1) (Yin and yang 1) (YY-1)	21	Polycomb repressive complex 1 (PRC1, hPRC-H), Ku antigen-YY1-alphaMyHC promoter complex, YY1-Notch1-RBP-Jkappa complex, YY1-Notch1 complex, hs4 enhancer complex (faster migrating complex), hs4 enhancer complex (slow migrating complex), YY1-MDM2-p53 complex, EED-EZH-YY1 polycomb complex	6|7	13	6.5	2	1|2|0|0|2|0|1|0|0|0|0|0|0|0|0|0|0|0|0|0|0|0|0|0|0|1|0|0|0|0|2|1|0|0|0|0|0|0|0|0|0|0|0|0	1
FEV	Q99581	ENSG00000163497	Ets	Q5VZL5	ZMYM4	Zinc finger MYM-type protein 4 (Zinc finger protein 262)	21		25|14	39	19.5	2	4|3|8|3|8|1|5|0|4|0|0|0|0|0|0|1|1|0|0|0|0|0|0|0|0|0|7|10|1|1|12|16|1|1|5|4|0|2|0|0|10|8|2|3	0.91
FEV	Q99581	ENSG00000163497	Ets	Q9H7S9	ZN703	Zinc finger protein 703 (Zinc finger elbow-related proline domain protein 1)	20		5|7	12	6	2	0|0|0|0|0|0|0|0|0|0|0|0|0|0|0|0|0|0|0|0|0|0|0|0|0|0|0|0|0|0|0|0|0|0|0|0|0|0|0|0|0|0|0|0	1
FEV	Q99581	ENSG00000163497	Ets	P50219	MNX1	Motor neuron and pancreas homeobox protein 1 (Homeobox protein HB9)	19		4|3	7	3.5	2	0|0|0|0|0|0|0|0|1|0|0|0|0|0|0|0|0|0|0|0|0|0|0|0|0|0|0|0|0|0|0|0|0|0|0|0|0|0|0|0|0|0|0|0	0.99	X				X	X
FEV	Q99581	ENSG00000163497	Ets	Q9P0W2	HM20B	SWI/SNF-related matrix-associated actin-dependent regulator of chromatin subfamily E member 1-related (SMARCE1-related protein) (BRCA2-associated factor 35) (HMG box-containing protein 20B) (HMG domain-containing protein 2) (HMG domain-containing protein HMGX2) (Sox-like transcriptional factor) (Structural DNA-binding protein BRAF35)	19	CoREST-HDAC complex, LSD1 complex, Anti-HDAC2 complex, anti-BHC110 complex, BHC complex, BRAF53-BRCA2 complex, BHC110 complex, 17S U2 snRNP	5|2	7	3.5	2	0|0|1|0|2|0|0|0|1|0|0|0|0|1|0|0|0|0|0|0|0|0|0|0|0|0|0|0|0|0|0|0|0|0|0|0|0|0|0|0|0|0|0|0	0.96
FEV	Q99581	ENSG00000163497	Ets	Q04727	TLE4	Transducin-like enhancer protein 4 (Grg-4) (Groucho-related protein 4)	19	OCT2-TLE4 complex	16|15	31	15.5	2	0|0|0|0|0|0|0|0|0|0|0|0|0|0|0|0|0|0|0|0|0|0|0|0|0|0|0|0|0|0|0|0|0|0|0|0|0|0|0|0|0|0|0|0	1
FEV	Q99581	ENSG00000163497	Ets	P14859	PO2F1	POU domain, class 2, transcription factor 1 (NF-A1) (Octamer-binding protein 1) (Oct-1) (Octamer-binding transcription factor 1) (OTF-1)	18	OCT1-SOX2 DNA-protein complex, hs4 enhancer complex (faster migrating complex), OCT1-OBF1-DNA-TLE1 complex, OCT1-OBF1-DNA complex, OCT1-OBF1-DNA complex	3|4	7	3.5	2	0|0|0|0|0|0|0|0|0|0|0|0|0|0|0|0|0|0|0|0|0|0|0|0|0|0|0|0|0|0|0|0|0|0|0|0|0|0|0|0|0|0|0|0	0.99
FEV	Q99581	ENSG00000163497	Ets	P49848	TAF6	Transcription initiation factor TFIID subunit 6 (RNA polymerase II TBP-associated factor subunit E) (Transcription initiation factor TFIID 70 kDa subunit) (TAF(II)70) (TAFII-70) (TAFII70) (Transcription initiation factor TFIID 80 kDa subunit) (TAF(II)80) (TAFII-80) (TAFII80)	18	TFIID complex, TFTC complex (TATA-binding protein-free TAF-II-containing complex), TFTC complex (TATA-binding protein-free TAF-II-containing complex), TFTC complex (TATA-binding protein-free TAF-II-containing complex), TFTC complex (TATA-binding protein-free TAF-II-containing complex), TFTC complex (TATA-binding protein-free TAF-II-containing complex), TFIID complex, TFIID-beta complex, TFTC comp…	15|13	28	14	2	5|5|8|3|8|4|5|1|7|3|2|1|1|1|0|0|2|0|1|0|0|1|0|0|0|1|3|3|3|3|8|9|0|1|2|1|0|0|0|0|5|3|3|2	0.94
FEV	Q99581	ENSG00000163497	Ets	Q15911	ZFHX3	Zinc finger homeobox protein 3 (AT motif-binding factor 1) (AT-binding transcription factor 1) (Alpha-fetoprotein enhancer-binding protein) (Zinc finger homeodomain protein 3) (ZFH-3)	18		16|9	25	12.5	2	0|0|0|0|0|0|0|0|1|0|0|0|0|0|0|0|0|0|0|0|0|0|0|0|0|0|0|0|0|0|0|0|0|0|0|0|0|0|0|0|0|0|0|0	1
FEV	Q99581	ENSG00000163497	Ets	Q96ME7	ZN512	Zinc finger protein 512	18		11|9	20	10	2	1|2|1|0|1|0|1|0|2|0|2|1|1|0|0|0|0|0|0|0|0|0|0|0|0|2|4|5|1|1|3|5|0|1|0|2|0|0|0|0|3|8|4|4	0.94
FEV	Q99581	ENSG00000163497	Ets	Q76L83	ASXL2	Putative Polycomb group protein ASXL2 (Additional sex combs-like protein 2)	17		3|4	7	3.5	2	2|1|0|1|0|0|0|0|1|1|0|0|0|0|0|0|0|0|0|0|0|0|0|0|0|0|0|0|0|0|0|0|0|0|0|0|0|0|0|0|1|0|0|0	0.99
FEV	Q99581	ENSG00000163497	Ets	Q92585	MAML1	Mastermind-like protein 1 (Mam-1)	17	HES1 promoter-Notch enhancer complex, RBPJ-NOTCH1-MAML1 complex, RBPJ-NOTCH1-MAML1 complex, RBPJ-NOTCH1-MAML1 complex	4|5	9	4.5	2	4|5|0|0|0|0|2|0|4|0|0|0|0|0|0|0|0|0|0|0|0|0|0|0|0|1|6|3|0|0|4|2|0|0|0|0|0|1|0|0|0|0|0|0	0.75
FEV	Q99581	ENSG00000163497	Ets	Q6P4R8	NFRKB	Nuclear factor related to kappa-B-binding protein (DNA-binding protein R kappa-B) (INO80 complex subunit G)	17	INO80 chromatin remodeling complex	8|5	13	6.5	2	0|0|0|0|0|0|0|0|0|0|0|0|0|0|0|0|0|0|0|0|0|0|0|0|0|0|0|3|0|0|0|0|0|0|0|0|0|0|0|0|0|0|0|0	1
FEV	Q99581	ENSG00000163497	Ets	P37275	ZEB1	Zinc finger E-box-binding homeobox 1 (NIL-2-A zinc finger protein) (Negative regulator of IL2) (Transcription factor 8) (TCF-8)	17	CtBP complex, CtBP core complex	6|8	14	7	2	0|1|1|0|3|0|2|0|1|0|0|0|0|0|0|0|0|0|0|0|0|0|0|0|0|0|1|1|0|0|0|1|0|0|0|0|0|0|0|0|0|0|0|0	1
FEV	Q99581	ENSG00000163497	Ets	Q96F45	ZN503	Zinc finger protein 503	17		11|12	23	11.5	2	1|1|1|0|1|0|2|0|0|0|1|1|1|1|0|0|0|0|0|0|0|0|0|0|0|0|1|1|1|0|1|0|0|0|0|0|0|0|0|0|0|0|0|0	1
FEV	Q99581	ENSG00000163497	Ets	Q92766	RREB1	Ras-responsive element-binding protein 1 (RREB-1) (Finger protein in nuclear bodies) (Raf-responsive zinc finger protein LZ321) (Zinc finger motif enhancer-binding protein 1) (Zep-1)	16	LSD1 complex, CtBP complex	10|9	19	9.5	2	0|1|1|0|0|0|0|0|0|0|0|0|0|0|0|1|0|0|0|0|0|0|0|0|0|0|0|0|0|0|0|0|0|0|0|0|0|0|0|0|1|0|0|0	1
FEV	Q99581	ENSG00000163497	Ets	Q8N488	RYBP	RING1 and YY1-binding protein (Apoptin-associating protein 1) (APAP-1) (Death effector domain-associated factor) (DED-associated factor) (YY1 and E4TF1-associated factor 1)	16	BCOR complex	6|3	9	4.5	2	0|0|0|0|0|0|0|0|2|0|0|0|0|0|0|0|0|0|0|0|0|0|0|0|0|0|1|0|0|0|0|0|0|0|0|0|0|0|0|0|0|0|0|0	1
FEV	Q99581	ENSG00000163497	Ets	Q9UIU6	SIX4	Homeobox protein SIX4 (Sine oculis homeobox homolog 4)	16		4|4	8	4	2	2|4|0|0|0|0|1|0|1|1|0|0|0|0|0|0|0|0|0|0|0|0|0|0|0|0|1|0|0|0|0|1|0|0|0|0|0|0|0|0|0|0|0|0	0.94
FEV	Q99581	ENSG00000163497	Ets	Q9UKY1	ZHX1	Zinc fingers and homeoboxes protein 1	16		4|4	8	4	2	1|0|0|0|0|0|2|1|1|0|0|0|0|0|0|0|0|0|0|0|0|0|0|0|0|0|0|0|0|0|0|1|0|0|0|0|0|0|0|0|0|0|0|0	1
FEV	Q99581	ENSG00000163497	Ets	P49711	CTCF	Transcriptional repressor CTCF (11-zinc finger protein) (CCCTC-binding factor) (CTCFL paralog)	15	CTCF-nucleophosmin-PARP-HIS-KPNA-LMNA-TOP complex, SMAD3-SMAD4-CTCF protein-DNA complex, CTFC-TAF1 complex, CTCF-nucleophosmin complex	6|5	11	5.5	2	1|1|1|1|1|0|3|0|1|0|1|1|1|1|1|2|2|0|1|1|4|3|0|0|0|0|0|0|1|1|1|1|0|0|0|1|0|0|0|0|0|4|0|1	0.93
FEV	Q99581	ENSG00000163497	Ets	Q9UMN6	KMT2B	Histone-lysine N-methyltransferase 2B (Lysine N-methyltransferase 2B) (EC 2.1.1.43) (Myeloid/lymphoid or mixed-lineage leukemia protein 4) (Trithorax homolog 2) (WW domain-binding protein 7) (WBP-7)	15	Menin-associated histone methyltransferase complex, PTIP-HMT complex	24|16	40	20	2	9|11|1|1|4|4|7|2|6|6|0|0|0|0|0|0|0|0|0|0|0|0|0|0|0|1|5|6|0|0|3|7|0|0|0|0|0|0|0|0|0|0|0|0	0.98
FEV	Q99581	ENSG00000163497	Ets	P08651	NFIC	Nuclear factor 1 C-type (NF1-C) (Nuclear factor 1/C) (CCAAT-box-binding transcription factor) (CTF) (Nuclear factor I/C) (NF-I/C) (NFI-C) (TGGCA-binding protein)	15		3|3	6	3	2	0|0|0|0|0|0|0|0|0|1|0|0|0|0|0|0|0|0|0|0|0|0|0|0|0|0|1|0|0|0|0|0|0|0|0|0|0|0|0|0|0|0|0|0	0.99
FEV	Q99581	ENSG00000163497	Ets	Q86SE9	PCGF5	Polycomb group RING finger protein 5 (RING finger protein 159)	15		3|4	7	3.5	2	1|0|0|0|0|0|1|1|1|1|0|1|0|1|0|0|0|0|0|0|0|0|0|0|0|0|0|0|0|0|0|0|0|0|0|0|0|0|0|0|0|0|0|0	0.99
FEV	Q99581	ENSG00000163497	Ets	Q9UQE7	SMC3	Structural maintenance of chromosomes protein 3 (SMC protein 3) (SMC-3) (Basement membrane-associated chondroitin proteoglycan) (Bamacan) (Chondroitin sulfate proteoglycan 6) (Chromosome-associated polypeptide) (hCAP)	15	Cohesin-SA1 complex, Cohesin-SA2 complex, Cohesin-SA2 complex, Cohesin-SA1 complex, Cohesin-SA1 complex, Cohesin-SA2 complex, SNF2h-cohesin-NuRD complex, Sororin-cohesin complex, SMC1-SMC3 complex, Sororin-cohesin complex, DDX11-RAD21-SMC1A-SMC3 complex	8|9	17	8.5	2	2|4|8|1|8|3|4|0|4|1|1|1|1|1|4|1|1|0|1|1|1|1|1|1|0|0|6|4|0|0|2|5|0|0|1|3|0|0|0|0|4|4|2|2	0.79
FEV	Q99581	ENSG00000163497	Ets	Q9UI36	DACH1	Dachshund homolog 1 (Dach1)	14		5|7	12	6	2	0|0|0|0|0|0|0|0|0|0|0|0|0|0|0|0|0|0|0|0|0|0|0|0|0|1|0|2|0|2|0|0|0|0|0|0|0|0|0|0|1|1|0|0	1
FEV	Q99581	ENSG00000163497	Ets	Q06546	GABPA	GA-binding protein alpha chain (GABP subunit alpha) (Nuclear respiratory factor 2 subunit alpha) (Transcription factor E4TF1-60)	14		7|9	16	8	2	2|1|1|2|1|0|2|0|1|0|0|0|0|0|2|0|0|0|0|0|0|0|0|0|0|0|0|0|1|0|0|5|0|0|0|0|0|0|0|0|2|1|0|0	0.99
FEV	Q99581	ENSG00000163497	Ets	P10244	MYBB	Myb-related protein B (B-Myb) (Myb-like protein 2)	14	LIN9-BMYB complex, LINC complex, S-phase	5|4	9	4.5	2	3|2|0|0|0|0|1|1|1|2|0|0|0|0|0|0|0|0|0|0|0|0|0|0|0|0|0|0|0|0|0|0|0|0|0|0|0|0|0|0|0|0|0|0	0.97
FEV	Q99581	ENSG00000163497	Ets	Q14683	SMC1A	Structural maintenance of chromosomes protein 1A (SMC protein 1A) (SMC-1-alpha) (SMC-1A) (Sb1.8)	14	Cohesin-SA1 complex, Cohesin-SA2 complex, Cohesin-SA2 complex, Cohesin-SA1 complex, Cohesin-SA1 complex, Cohesin-SA2 complex, SNF2h-cohesin-NuRD complex, Sororin-cohesin complex, MDC1-p53BP1-SMC1 complex, SMC1-SMC3 complex, Sororin-cohesin complex, DDX11-RAD21-SMC1A-SMC3 complex	14|10	24	12	2	4|2|8|3|8|1|3|2|4|2|1|2|2|0|0|0|0|0|0|0|0|0|0|0|0|0|10|13|0|0|3|8|0|0|0|2|0|1|0|0|7|5|3|5	0.83
FEV	Q99581	ENSG00000163497	Ets	Q9UGU0	TCF20	Transcription factor 20 (TCF-20) (Nuclear factor SPBP) (Protein AR1) (Stromelysin-1 PDGF-responsive element-binding protein) (SPRE-binding protein)	14		10|5	15	7.5	2	1|1|0|0|0|0|1|0|1|0|0|0|0|0|0|0|0|0|0|0|0|0|0|0|0|0|2|5|0|0|1|3|0|0|0|0|0|1|0|0|0|0|0|0	0.97
FEV	Q99581	ENSG00000163497	Ets	Q969J2	ZKSC4	Zinc finger protein with KRAB and SCAN domains 4 (P373c6.1) (Zinc finger protein 307) (Zinc finger protein 427)	14		26|28	54	27	2	1|2|3|0|6|0|5|0|3|0|2|2|2|2|2|0|2|0|0|0|0|0|0|0|0|0|6|5|3|5|11|12|1|1|2|3|4|2|0|0|9|5|0|0	1
FEV	Q99581	ENSG00000163497	Ets	O75362	ZN217	Zinc finger protein 217	14	CoREST-HDAC complex, LSD1 complex, anti-BHC110 complex, CtBP complex, BHC110 complex	5|4	9	4.5	2	0|1|0|0|0|0|0|0|0|0|0|1|1|1|0|0|0|0|0|0|0|0|0|0|0|0|0|0|0|0|0|0|0|0|0|0|0|0|0|0|0|0|0|0	1
FEV	Q99581	ENSG00000163497	Ets	Q9BQE9	BCL7B	B-cell CLL/lymphoma 7 protein family member B (allergen Hom s 3)	13		2|3	5	2.5	2	0|0|1|1|1|1|0|0|0|0|0|0|0|0|0|1|0|0|0|0|0|0|0|0|0|0|2|2|0|0|0|0|0|0|0|0|0|0|0|0|0|0|0|0	0.85
FEV	Q99581	ENSG00000163497	Ets	Q96JM7	LMBL3	Lethal(3)malignant brain tumor-like protein 3 (H-l(3)mbt-like protein 3) (L(3)mbt-like protein 3) (MBT-1)	13		6|7	13	6.5	2	0|3|1|0|1|0|0|0|0|0|0|0|1|0|0|0|0|0|0|0|0|0|0|0|0|0|0|1|0|0|1|2|0|0|0|0|0|0|0|0|1|0|0|0	1
FEV	Q99581	ENSG00000163497	Ets	Q14686	NCOA6	Nuclear receptor coactivator 6 (Activating signal cointegrator 2) (ASC-2) (Amplified in breast cancer protein 3) (Cancer-amplified transcriptional coactivator ASC-2) (Nuclear receptor coactivator RAP250) (NRC RAP250) (Nuclear receptor-activating protein, 250 kDa) (Peroxisome proliferator-activated receptor-interacting protein) (PPAR-interacting protein) (PRIP) (Thyroid hormone receptor-binding pr…	13	DICER1-NCOA6-AGO2 complex, ASCOM complex, UTX-MLL2/3 complex, NCOA6-DNA-PK-Ku-PARP1 complex, PTIP-HMT complex, MLL3 complex, MLL4 complex	22|20	42	21	2	14|12|8|5|12|6|15|2|12|8|1|1|2|0|3|4|2|0|0|0|0|0|0|0|2|3|14|13|6|9|13|17|0|1|4|4|2|8|0|0|7|10|5|2	0.8
[truncated: 6,141 more rows]

## Sheet: S1C AP-MS
Bait	Bait Uniprot	BAIT ENSG	Bait DBD	Prey	PreyGene	Prey protein name	Spec	SpecSum	AvgSpec	NumReplicates	ctrlCounts	SaintScore	Seen in any of the others studies	Intact	Biogrid	PINA2	String _all	String_experimental	Match to Li et al. 2015
[truncated: 2,176 more rows]
