# Supplementary material for: Human transcription factor protein interaction networks
Source: Research Square preprint supplement (doi:10.21203/rs.3.rs-228624/v1), 2021-02-23
Supplement: Supplementary file 4 [file 7f5fc0aab427a0d6cf5d0c3a.xlsx]

## Sheet: Sheet1
Uniprot	Gene	Gene name	Reliability	Enhanced	Supported	Approved	Uncertain	Single-cell variation intensity	Single-cell variation spatial	Cell cycle dependency	GO id	ANY nucl* localization
A6NHR9	ENSG00000101596	SMCHD1	Approved			Nuclear bodies;Nucleoplasm					Nuclear bodies (GO:0016604);Nucleoplasm (GO:0005654)	Approved
A6NKD9	ENSG00000205476	CCDC85C	Approved			Cell Junctions;Nuclear speckles					Cell Junctions (GO:0030054);Nuclear speckles (GO:0016607)	Approved
A6NNY8	ENSG00000273820	USP27X	Approved			Nucleoplasm;Vesicles					Nucleoplasm (GO:0005654);Vesicles (GO:0043231)	Approved
A7XYQ1	ENSG00000112320	SOBP	Approved			Nucleoplasm;Vesicles					Nucleoplasm (GO:0005654);Vesicles (GO:0043231)	Approved
O00148	ENSG00000123136	DDX39A	Approved			Nuclear speckles					Nuclear speckles (GO:0016607)	Approved
O00178	ENSG00000100226	GTPBP1	Approved			Cytosol;Golgi apparatus;Nuclear bodies					Cytosol (GO:0005829);Golgi apparatus (GO:0005794);Nuclear bodies (GO:0016604)	Approved
O00264	ENSG00000101856	PGRMC1	Approved			Endoplasmic reticulum;Nucleoli					Endoplasmic reticulum (GO:0005783);Nucleoli (GO:0005730)	Approved
O00287	ENSG00000133111	RFXAP	Approved			Nuclear speckles					Nuclear speckles (GO:0016607)	Approved
O00512	ENSG00000116128	BCL9	Approved			Nuclear bodies;Nucleoplasm			Nuclear bodies;Nucleoplasm		Nuclear bodies (GO:0016604);Nucleoplasm (GO:0005654)	Approved
O14524	ENSG00000166881	NEMP1	Approved			Nucleoplasm					Nucleoplasm (GO:0005654)	Approved
O14686	ENSG00000167548	KMT2D	Approved			Cytosol;Nucleus;Plasma membrane					Cytosol (GO:0005829);Nucleus (GO:0005634);Plasma membrane (GO:0005886)	Approved
O14787	ENSG00000105576	TNPO2	Approved			Nucleoli;Nucleus		Nucleoli			Nucleoli (GO:0005730);Nucleus (GO:0005634)	Approved
O15063	ENSG00000166398	KIAA0355	Approved			Nucleoplasm					Nucleoplasm (GO:0005654)	Approved
O15090	ENSG00000198597	ZNF536	Approved			Cell Junctions;Nucleus					Cell Junctions (GO:0030054);Nucleus (GO:0005634)	Approved
O15347	ENSG00000029993	HMGB3	Approved			Nucleoli;Nucleus					Nucleoli (GO:0005730);Nucleus (GO:0005634)	Approved
O15391	ENSG00000230797	YY2	Approved			Nuclear bodies					Nuclear bodies (GO:0016604)	Approved
O15550	ENSG00000147050	KDM6A	Approved			Nucleoli		Nucleoli			Nucleoli (GO:0005730)	Approved
O43257	ENSG00000106400	ZNHIT1	Approved			Nucleoplasm					Nucleoplasm (GO:0005654)	Approved
O43707	ENSG00000130402	ACTN4	Approved			Cytosol;Nuclear bodies					Cytosol (GO:0005829);Nuclear bodies (GO:0016604)	Approved
O43763	ENSG00000115297	TLX2	Approved			Nucleoplasm					Nucleoplasm (GO:0005654)	Approved
O60315	ENSG00000169554	ZEB2	Approved			Cytosol;Nucleoli;Nucleus					Cytosol (GO:0005829);Nucleoli (GO:0005730);Nucleus (GO:0005634)	Approved
O60814	ENSG00000197903	HIST1H2BK	Approved			Cytosol;Nucleoplasm					Cytosol (GO:0005829);Nucleoplasm (GO:0005654)	Approved
O60907	ENSG00000101849	TBL1X	Approved			Nucleoli;Nucleus		Nucleoli;Nucleus			Nucleoli (GO:0005730);Nucleus (GO:0005634)	Approved
O60925	ENSG00000113068	PFDN1	Approved			Cytosol;Nucleoli;Plasma membrane					Cytosol (GO:0005829);Nucleoli (GO:0005730);Plasma membrane (GO:0005886)	Approved
O60934	ENSG00000104320	NBN	Approved			Golgi apparatus;Nucleoplasm					Golgi apparatus (GO:0005794);Nucleoplasm (GO:0005654)	Approved
O75113	ENSG00000102921	N4BP1	Approved			Nucleoli fibrillar center		Nucleoli fibrillar center			Nucleoli fibrillar center (GO:0001650)	Approved
O75182	ENSG00000127511	SIN3B	Approved			Nucleoplasm;Plasma membrane					Nucleoplasm (GO:0005654);Plasma membrane (GO:0005886)	Approved
O75607	ENSG00000107833	NPM3	Approved			Actin filaments;Cytosol;Nucleoli					Actin filaments (GO:0015629);Cytosol (GO:0005829);Nucleoli (GO:0005730)	Approved
O75626	ENSG00000057657	PRDM1	Approved			Nucleoli;Nucleus					Nucleoli (GO:0005730);Nucleus (GO:0005634)	Approved
O94864	ENSG00000119760	SUPT7L	Approved			Nucleoplasm					Nucleoplasm (GO:0005654)	Approved
O95365	ENSG00000178951	ZBTB7A	Approved			Nucleoplasm					Nucleoplasm (GO:0005654)	Approved
O95486	ENSG00000113615	SEC24A	Approved			Nucleoli fibrillar center;Vesicles					Nucleoli fibrillar center (GO:0001650);Vesicles (GO:0043231)	Approved
O95487	ENSG00000138802	SEC24B	Approved			Nucleus;Vesicles					Nucleus (GO:0005634);Vesicles (GO:0043231)	Approved
O95619	ENSG00000127337	YEATS4	Approved			Nuclear membrane;Nucleoplasm					Nuclear membrane (GO:0031965);Nucleoplasm (GO:0005654)	Approved
O95677	ENSG00000112319	EYA4	Approved			Nucleoplasm		Nucleoplasm			Nucleoplasm (GO:0005654)	Approved
P03372	ENSG00000091831	ESR1	Approved			Nucleus;Vesicles					Nucleus (GO:0005634);Vesicles (GO:0043231)	Approved
P06899	ENSG00000124635	HIST1H2BJ	Approved			Cytosol;Nucleoplasm					Cytosol (GO:0005829);Nucleoplasm (GO:0005654)	Approved
P0DJD0	ENSG00000187627	RGPD1	Approved			Nuclear membrane;Vesicles					Nuclear membrane (GO:0031965);Vesicles (GO:0043231)	Approved
P11308	ENSG00000157554	ERG	Approved			Cytosol;Nucleoplasm					Cytosol (GO:0005829);Nucleoplasm (GO:0005654)	Approved
P17036	ENSG00000166526	ZNF3	Approved			Nucleoplasm		Nucleoplasm			Nucleoplasm (GO:0005654)	Approved
P17066	ENSG00000173110	HSPA6	Approved			Nucleoplasm;Vesicles			Nucleoplasm		Nucleoplasm (GO:0005654);Vesicles (GO:0043231)	Approved
P17482	ENSG00000170689	HOXB9	Approved			Mitochondria;Nucleoplasm		Mitochondria			Mitochondria (GO:0005739);Nucleoplasm (GO:0005654)	Approved
P19105	ENSG00000101608	MYL12A	Approved			Nucleoli fibrillar center;Nucleus					Nucleoli fibrillar center (GO:0001650);Nucleus (GO:0005634)	Approved
P19784	ENSG00000070770	CSNK2A2	Approved			Cytosol;Nucleoplasm;Vesicles		Vesicles			Cytosol (GO:0005829);Nucleoplasm (GO:0005654);Vesicles (GO:0043231)	Approved
P20962	ENSG00000159335	PTMS	Approved			Nucleoli;Nucleus			Nucleoli;Nucleus		Nucleoli (GO:0005730);Nucleus (GO:0005634)	Approved
P31277	ENSG00000128713	HOXD11	Approved			Nucleoplasm					Nucleoplasm (GO:0005654)	Approved
P31944	ENSG00000105141	CASP14	Approved			Cytosol;Mitochondria;Nucleus					Cytosol (GO:0005829);Mitochondria (GO:0005739);Nucleus (GO:0005634)	Approved
P34931	ENSG00000204390	HSPA1L	Approved			Nucleoplasm;Vesicles			Nucleoplasm		Nucleoplasm (GO:0005654);Vesicles (GO:0043231)	Approved
P35712	ENSG00000110693	SOX6	Approved			Nucleoplasm					Nucleoplasm (GO:0005654)	Approved
P38159	ENSG00000147274	RBMX	Approved			Nucleoplasm					Nucleoplasm (GO:0005654)	Approved
P40425	ENSG00000204304	PBX2	Approved			Nucleoplasm					Nucleoplasm (GO:0005654)	Approved
P40429	ENSG00000142541	RPL13A	Approved			Cytosol;Nucleoli					Cytosol (GO:0005829);Nucleoli (GO:0005730)	Approved
P41162	ENSG00000117036	ETV3	Approved			Nucleus					Nucleus (GO:0005634)	Approved
P42694	ENSG00000198265	HELZ	Approved			Actin filaments;Nucleoli;Plasma membrane					Actin filaments (GO:0015629);Nucleoli (GO:0005730);Plasma membrane (GO:0005886)	Approved
P50219	ENSG00000130675	MNX1	Approved			Cytosol;Nucleoli;Nucleus		Nucleoli			Cytosol (GO:0005829);Nucleoli (GO:0005730);Nucleus (GO:0005634)	Approved
P50458	ENSG00000106689	LHX2	Approved			Nucleoplasm					Nucleoplasm (GO:0005654)	Approved
P51398	ENSG00000132676	DAP3	Supported		Mitochondria	Nucleoplasm					Mitochondria (GO:0005739);Nucleoplasm (GO:0005654)	Approved
P52747	ENSG00000166478	ZNF143	Approved			Nuclear bodies;Nucleoplasm;Vesicles					Nuclear bodies (GO:0016604);Nucleoplasm (GO:0005654);Vesicles (GO:0043231)	Approved
P52952	ENSG00000183072	NKX2-5	Approved			Cytosol;Nucleoplasm					Cytosol (GO:0005829);Nucleoplasm (GO:0005654)	Approved
P53621	ENSG00000122218	COPA	Approved			Cytosol;Golgi apparatus;Nucleoplasm					Cytosol (GO:0005829);Golgi apparatus (GO:0005794);Nucleoplasm (GO:0005654)	Approved
P54652	ENSG00000126803	HSPA2	Approved			Nucleoplasm;Vesicles			Nucleoplasm		Nucleoplasm (GO:0005654);Vesicles (GO:0043231)	Approved
P55198	ENSG00000275023	MLLT6	Approved			Nucleus					Nucleus (GO:0005634)	Approved
P56179	ENSG00000006377	DLX6	Approved			Nuclear bodies					Nuclear bodies (GO:0016604)	Approved
P61254	ENSG00000161970	RPL26	Supported		Cytosol;Endoplasmic reticulum	Nucleoli					Cytosol (GO:0005829);Endoplasmic reticulum (GO:0005783);Nucleoli (GO:0005730)	Approved
P61956	ENSG00000188612	SUMO2	Approved			Nuclear bodies;Nucleoplasm					Nuclear bodies (GO:0016604);Nucleoplasm (GO:0005654)	Approved
P62847	ENSG00000138326	RPS24	Approved			Cytosol;Endoplasmic reticulum;Nuclear bodies					Cytosol (GO:0005829);Endoplasmic reticulum (GO:0005783);Nuclear bodies (GO:0016604)	Approved
P63167	ENSG00000088986	DYNLL1	Approved			Cytosol;Nuclear bodies;Nucleoplasm					Cytosol (GO:0005829);Nuclear bodies (GO:0016604);Nucleoplasm (GO:0005654)	Approved
P78332	ENSG00000004534	RBM6	Approved			Cytoplasmic bodies;Nuclear speckles					Cytoplasmic bodies (GO:0036464);Nuclear speckles (GO:0016607)	Approved
P82933	ENSG00000135972	MRPS9	Enhanced	Mitochondria		Nucleoli		Mitochondria	Mitochondria;Nucleoli		Mitochondria (GO:0005739);Nucleoli (GO:0005730)	Approved
Q00653	ENSG00000077150	NFKB2	Approved			Cytosol;Nucleoplasm					Cytosol (GO:0005829);Nucleoplasm (GO:0005654)	Approved
Q01201	ENSG00000104856	RELB	Approved			Cytosol;Nucleoplasm					Cytosol (GO:0005829);Nucleoplasm (GO:0005654)	Approved
Q05BQ5	ENSG00000011258	MBTD1	Approved			Cytosol;Nucleus					Cytosol (GO:0005829);Nucleus (GO:0005634)	Approved
Q06413	ENSG00000081189	MEF2C	Supported		Vesicles	Nucleoplasm					Nucleoplasm (GO:0005654);Vesicles (GO:0043231)	Approved
Q06587	ENSG00000204227	RING1	Approved			Cytosol;Nucleoplasm					Cytosol (GO:0005829);Nucleoplasm (GO:0005654)	Approved
Q12873	ENSG00000170004	CHD3	Approved			Microtubule organizing center;Nucleoli;Nucleus			Nucleoli;Nucleus		Microtubule organizing center (GO:0005815);Nucleoli (GO:0005730);Nucleus (GO:0005634)	Approved
Q13129	ENSG00000117000	RLF	Approved			Nucleus					Nucleus (GO:0005634)	Approved
Q13206	ENSG00000178105	DDX10	Approved			Nucleoli					Nucleoli (GO:0005730)	Approved
Q13610	ENSG00000136045	PWP1	Approved			Golgi apparatus;Nucleoli		Nucleoli		N/A (custom data)	Golgi apparatus (GO:0005794);Nucleoli (GO:0005730)	Approved
Q14135	ENSG00000144560	VGLL4	Approved			Nucleoli fibrillar center;Nucleus					Nucleoli fibrillar center (GO:0001650);Nucleus (GO:0005634)	Approved
Q14157	ENSG00000143569	UBAP2L	Approved			Cytosol;Nuclear speckles					Cytosol (GO:0005829);Nuclear speckles (GO:0016607)	Approved
Q14687	ENSG00000131149	GSE1	Approved			Mitochondria;Nucleoplasm					Mitochondria (GO:0005739);Nucleoplasm (GO:0005654)	Approved
Q14865	ENSG00000150347	ARID5B	Approved			Cytosol;Endoplasmic reticulum;Nucleoplasm;Plasma membrane					Cytosol (GO:0005829);Endoplasmic reticulum (GO:0005783);Nucleoplasm (GO:0005654);Plasma membrane (GO:0005886)	Approved
Q14CW9	ENSG00000087152	ATXN7L3	Approved			Nuclear speckles;Plasma membrane					Nuclear speckles (GO:0016607);Plasma membrane (GO:0005886)	Approved
Q15032	ENSG00000048991	R3HDM1	Approved			Cytosol;Nucleoplasm					Cytosol (GO:0005829);Nucleoplasm (GO:0005654)	Approved
Q15154	ENSG00000078674	PCM1	Enhanced	Centrosome		Cytosol;Nuclear membrane					Centrosome (GO:0005813);Cytosol (GO:0005829);Nuclear membrane (GO:0031965)	Approved
Q15532	ENSG00000141380	SS18	Approved			Cytosol;Nucleoplasm					Cytosol (GO:0005829);Nucleoplasm (GO:0005654)	Approved
Q15652	ENSG00000171988	JMJD1C	Supported			Cytosol;Nucleoplasm		Nucleoplasm			Cytosol (GO:0005829);Nucleoplasm (GO:0005654)	Approved
Q15653	ENSG00000104825	NFKBIB	Approved			Centrosome;Cytosol;Nucleoplasm					Centrosome (GO:0005813);Cytosol (GO:0005829);Nucleoplasm (GO:0005654)	Approved
Q2KHR2	ENSG00000181827	RFX7	Approved			Nuclear membrane;Nucleus					Nuclear membrane (GO:0031965);Nucleus (GO:0005634)	Approved
Q2KHR3	ENSG00000060749	QSER1	Approved			Cytosol;Nucleoplasm					Cytosol (GO:0005829);Nucleoplasm (GO:0005654)	Approved
Q49AM3	ENSG00000115282	TTC31	Approved			Cytosol;Nucleoplasm					Cytosol (GO:0005829);Nucleoplasm (GO:0005654)	Approved
Q4LE39	ENSG00000054267	ARID4B	Approved			Nucleoplasm;Vesicles					Nucleoplasm (GO:0005654);Vesicles (GO:0043231)	Approved
Q4VC05	ENSG00000110987	BCL7A	Approved			Nucleoplasm;Vesicles					Nucleoplasm (GO:0005654);Vesicles (GO:0043231)	Approved
Q52LR7	ENSG00000135999	EPC2	Approved			Nuclear speckles					Nuclear speckles (GO:0016607)	Approved
Q5HY92	ENSG00000182263	FIGN	Approved			Cell Junctions;Cytosol;Nucleoplasm;Plasma membrane;Vesicles					Cell Junctions (GO:0030054);Cytosol (GO:0005829);Nucleoplasm (GO:0005654);Plasma membrane (GO:0005886);Vesicles (GO:0043231)	Approved
Q5JSZ5	ENSG00000130723	PRRC2B	Approved			Cytosol;Nuclear bodies					Cytosol (GO:0005829);Nuclear bodies (GO:0016604)	Approved
Q5T481	ENSG00000203867	RBM20	Approved			Cytokinetic bridge;Golgi apparatus;Nucleoli;Nucleus		Cytokinetic bridge		Cytokinetic bridge (biological definition)	Cytokinetic bridge (GO:0045171);Golgi apparatus (GO:0005794);Nucleoli (GO:0005730);Nucleus (GO:0005634)	Approved
Q5T5X7	ENSG00000178409	BEND3	Approved			Nucleoplasm					Nucleoplasm (GO:0005654)	Approved
Q5T6C5	ENSG00000162650	ATXN7L2	Approved			Cytosol;Nucleoli;Vesicles					Cytosol (GO:0005829);Nucleoli (GO:0005730);Vesicles (GO:0043231)	Approved
Q5VT52	ENSG00000163125	RPRD2	Approved			Nucleoplasm;Vesicles					Nucleoplasm (GO:0005654);Vesicles (GO:0043231)	Approved
Q5VV52	ENSG00000164011	ZNF691	Approved			Nucleoli;Nucleus;Vesicles					Nucleoli (GO:0005730);Nucleus (GO:0005634);Vesicles (GO:0043231)	Approved
Q641Q2	ENSG00000099290	WASHC2A	Supported		Vesicles	Nucleoli	Cytosol				Cytosol (GO:0005829);Nucleoli (GO:0005730);Vesicles (GO:0043231)	Approved
Q68G74	ENSG00000162624	LHX8	Approved			Cytosol;Nucleoli;Nucleus			Nucleoli;Nucleus		Cytosol (GO:0005829);Nucleoli (GO:0005730);Nucleus (GO:0005634)	Approved
Q6DKI1	ENSG00000146223	RPL7L1	Approved			Mitochondria;Nucleoli					Mitochondria (GO:0005739);Nucleoli (GO:0005730)	Approved
Q6N021	ENSG00000168769	TET2	Approved			Nucleoplasm					Nucleoplasm (GO:0005654)	Approved
Q6P1N0	ENSG00000132024	CC2D1A	Supported		Cytosol	Nucleoli fibrillar center;Plasma membrane					Cytosol (GO:0005829);Nucleoli fibrillar center (GO:0001650);Plasma membrane (GO:0005886)	Approved
Q6ZW49	ENSG00000157212	PAXIP1	Approved			Nucleoplasm;Vesicles					Nucleoplasm (GO:0005654);Vesicles (GO:0043231)	Approved
Q7Z2T5	ENSG00000121486	TRMT1L	Approved			Nucleoli;Nucleus					Nucleoli (GO:0005730);Nucleus (GO:0005634)	Approved
Q7Z3B4	ENSG00000138750	NUP54	Approved			Nucleoplasm					Nucleoplasm (GO:0005654)	Approved
Q7Z406	ENSG00000105357	MYH14	Approved			Nucleoplasm					Nucleoplasm (GO:0005654)	Approved
Q7Z739	ENSG00000185728	YTHDF3	Approved			Cytosol;Nuclear membrane;Nuclear speckles		Nuclear membrane;Nuclear speckles			Cytosol (GO:0005829);Nuclear membrane (GO:0031965);Nuclear speckles (GO:0016607)	Approved
Q86TJ2	ENSG00000173011	TADA2B	Approved			Nuclear speckles					Nuclear speckles (GO:0016607)	Approved
Q86U70	ENSG00000198728	LDB1	Approved			Nucleoplasm					Nucleoplasm (GO:0005654)	Approved
Q86UP3	ENSG00000091656	ZFHX4	Approved			Nucleoli fibrillar center;Nucleoplasm					Nucleoli fibrillar center (GO:0001650);Nucleoplasm (GO:0005654)	Approved
Q86XN7	ENSG00000120685	PROSER1	Approved			Cytosol;Nucleus					Cytosol (GO:0005829);Nucleus (GO:0005634)	Approved
Q8IVH2	ENSG00000137166	FOXP4	Approved			Cytosol;Nucleoplasm					Cytosol (GO:0005829);Nucleoplasm (GO:0005654)	Approved
Q8IXJ9	ENSG00000171456	ASXL1	Approved			Nucleoli;Nucleus					Nucleoli (GO:0005730);Nucleus (GO:0005634)	Approved
Q8IY37	ENSG00000150990	DHX37	Approved			Nuclear membrane					Nuclear membrane (GO:0031965)	Approved
Q8N5C8	ENSG00000157625	TAB3	Approved			Cytosol;Nuclear speckles					Cytosol (GO:0005829);Nuclear speckles (GO:0016607)	Approved
Q8N972	ENSG00000242852	ZNF709	Approved			Nucleoplasm					Nucleoplasm (GO:0005654)	Approved
Q8NB78	ENSG00000165097	KDM1B	Approved			Nucleus					Nucleus (GO:0005634)	Approved
Q8NCR0	ENSG00000162885	B3GALNT2	Approved			Golgi apparatus;Nucleoplasm					Golgi apparatus (GO:0005794);Nucleoplasm (GO:0005654)	Approved
Q8TAQ5	ENSG00000197050	ZNF420	Approved			Nucleoplasm					Nucleoplasm (GO:0005654)	Approved
Q8TD26	ENSG00000124177	CHD6	Approved			Nucleus					Nucleus (GO:0005634)	Approved
Q8TDD1	ENSG00000123064	DDX54	Approved			Golgi apparatus;Nucleoli;Nucleus					Golgi apparatus (GO:0005794);Nucleoli (GO:0005730);Nucleus (GO:0005634)	Approved
Q8WUZ0	ENSG00000099385	BCL7C	Approved			Nucleoplasm					Nucleoplasm (GO:0005654)	Approved
Q8WXX7	ENSG00000158321	AUTS2	Approved			Cytosol;Nucleoplasm		Nucleoplasm			Cytosol (GO:0005829);Nucleoplasm (GO:0005654)	Approved
Q92610	ENSG00000166716	ZNF592	Approved			Nucleoplasm					Nucleoplasm (GO:0005654)	Approved
Q92618	ENSG00000101493	ZNF516	Approved			Cytosol;Nucleoplasm					Cytosol (GO:0005829);Nucleoplasm (GO:0005654)	Approved
Q92782	ENSG00000011332	DPF1	Approved			Cytosol;Mitochondria;Nucleoplasm					Cytosol (GO:0005829);Mitochondria (GO:0005739);Nucleoplasm (GO:0005654)	Approved
Q92831	ENSG00000114166	KAT2B	Approved			Nucleus			Nucleus		Nucleus (GO:0005634)	Approved
Q969G2	ENSG00000121454	LHX4	Approved			Nuclear speckles					Nuclear speckles (GO:0016607)	Approved
Q969J2	ENSG00000187626	ZKSCAN4	Approved			Cytosol;Nucleoplasm		Nucleoplasm			Cytosol (GO:0005829);Nucleoplasm (GO:0005654)	Approved
Q969R5	ENSG00000100395	L3MBTL2	Approved			Nucleoplasm					Nucleoplasm (GO:0005654)	Approved
Q96C00	ENSG00000213588	ZBTB9	Approved			Mitochondria;Nucleoli;Nucleus					Mitochondria (GO:0005739);Nucleoli (GO:0005730);Nucleus (GO:0005634)	Approved
Q96DF8	ENSG00000100056	DGCR14	Approved			Nucleoplasm					Nucleoplasm (GO:0005654)	Approved
Q96E39	ENSG00000213516	RBMXL1	Approved			Nucleoplasm					Nucleoplasm (GO:0005654)	Approved
Q96EL2	ENSG00000062582	MRPS24	Approved			Nucleoplasm;Vesicles					Nucleoplasm (GO:0005654);Vesicles (GO:0043231)	Approved
Q96ES7	ENSG00000176476	SGF29	Approved			Nucleoli;Nucleus		Nucleoli			Nucleoli (GO:0005730);Nucleus (GO:0005634)	Approved
Q96EV2	ENSG00000184863	RBM33	Approved			Nucleoplasm					Nucleoplasm (GO:0005654)	Approved
Q96F45	ENSG00000165655	ZNF503	Approved			Cytosol;Nucleoplasm;Plasma membrane					Cytosol (GO:0005829);Nucleoplasm (GO:0005654);Plasma membrane (GO:0005886)	Approved
Q96G25	ENSG00000159479	MED8	Approved			Golgi apparatus;Nucleoplasm					Golgi apparatus (GO:0005794);Nucleoplasm (GO:0005654)	Approved
Q96GM5	ENSG00000066117	SMARCD1	Approved			Nucleoplasm;Vesicles					Nucleoplasm (GO:0005654);Vesicles (GO:0043231)	Approved
Q96GQ7	ENSG00000124228	DDX27	Approved			Nucleoli					Nucleoli (GO:0005730)	Approved
Q96I24	ENSG00000107164	FUBP3	Approved			Cytosol;Nucleoplasm					Cytosol (GO:0005829);Nucleoplasm (GO:0005654)	Approved
Q96IZ7	ENSG00000174891	RSRC1	Approved			Nuclear speckles					Nuclear speckles (GO:0016607)	Approved
Q96JM2	ENSG00000148143	ZNF462	Approved			Nucleoplasm					Nucleoplasm (GO:0005654)	Approved
Q96K83	ENSG00000198795	ZNF521	Approved			Nucleoplasm					Nucleoplasm (GO:0005654)	Approved
Q96KM6	ENSG00000196700	ZNF512B	Approved			Nucleoplasm					Nucleoplasm (GO:0005654)	Approved
Q96KR1	ENSG00000056097	ZFR	Approved			Nucleoplasm					Nucleoplasm (GO:0005654)	Approved
Q96M89	ENSG00000163006	CCDC138	Approved			Cytosol;Nucleus					Cytosol (GO:0005829);Nucleus (GO:0005634)	Approved
Q96Q05	ENSG00000167632	TRAPPC9	Approved			Golgi apparatus;Nucleoplasm;Vesicles		Vesicles			Golgi apparatus (GO:0005794);Nucleoplasm (GO:0005654);Vesicles (GO:0043231)	Approved
Q96SI1	ENSG00000153885	KCTD15	Approved			Golgi apparatus;Nucleoplasm					Golgi apparatus (GO:0005794);Nucleoplasm (GO:0005654)	Approved
Q96SK3	ENSG00000198182	ZNF607	Approved			Nucleoplasm					Nucleoplasm (GO:0005654)	Approved
Q99612	ENSG00000067082	KLF6	Approved			Cytosol;Nucleoli fibrillar center;Nucleus;Vesicles		Cytosol;Nucleus			Cytosol (GO:0005829);Nucleoli fibrillar center (GO:0001650);Nucleus (GO:0005634);Vesicles (GO:0043231)	Approved
Q9BQE9	ENSG00000106635	BCL7B	Approved			Nucleoplasm					Nucleoplasm (GO:0005654)	Approved
Q9BQI6	ENSG00000133302	SLF1	Approved			Nucleus					Nucleus (GO:0005634)	Approved
Q9BRJ6	ENSG00000146540	C7orf50	Approved			Nucleoli;Nucleus					Nucleoli (GO:0005730);Nucleus (GO:0005634)	Approved
Q9BRQ0	ENSG00000163348	PYGO2	Approved			Nucleoplasm		Nucleoplasm			Nucleoplasm (GO:0005654)	Approved
Q9BRX9	ENSG00000123154	WDR83	Approved		Vesicles	Centrosome;Nucleoplasm					Centrosome (GO:0005813);Nucleoplasm (GO:0005654);Vesicles (GO:0043231)	Approved
Q9BTC0	ENSG00000101191	DIDO1	Approved			Cytosol;Nucleoplasm;Vesicles		Vesicles			Cytosol (GO:0005829);Nucleoplasm (GO:0005654);Vesicles (GO:0043231)	Approved
Q9BU76	ENSG00000143793	C1orf35	Approved			Cytosol;Nuclear speckles;Plasma membrane		Cytosol;Plasma membrane			Cytosol (GO:0005829);Nuclear speckles (GO:0016607);Plasma membrane (GO:0005886)	Approved
Q9BWF3	ENSG00000173933	RBM4	Approved			Cytosol;Nucleoplasm					Cytosol (GO:0005829);Nucleoplasm (GO:0005654)	Approved
Q9BX40	ENSG00000149657	LSM14B	Supported		Vesicles	Nucleoli fibrillar center					Nucleoli fibrillar center (GO:0001650);Vesicles (GO:0043231)	Approved
Q9BZK7	ENSG00000177565	TBL1XR1	Approved			Nucleoplasm					Nucleoplasm (GO:0005654)	Approved
Q9GZR7	ENSG00000089737	DDX24	Approved			Cytosol;Nucleoli					Cytosol (GO:0005829);Nucleoli (GO:0005730)	Approved
Q9H0E9	ENSG00000112983	BRD8	Approved			Mitochondria;Nucleoplasm					Mitochondria (GO:0005739);Nucleoplasm (GO:0005654)	Approved
Q9H2P0	ENSG00000101126	ADNP	Approved			Nucleoplasm					Nucleoplasm (GO:0005654)	Approved
Q9H2Z4	ENSG00000125816	NKX2-4	Approved			Nuclear bodies					Nuclear bodies (GO:0016604)	Approved
Q9H6I2	ENSG00000164736	SOX17	Approved			Nucleoplasm					Nucleoplasm (GO:0005654)	Approved
Q9H6R7	ENSG00000163026	WDCP	Approved			Cytosol;Nucleoli					Cytosol (GO:0005829);Nucleoli (GO:0005730)	Approved
Q9H869	ENSG00000163374	YY1AP1	Approved			Nucleoli fibrillar center					Nucleoli fibrillar center (GO:0001650)	Approved
Q9H8M2	ENSG00000028310	BRD9	Approved			Nucleoplasm					Nucleoplasm (GO:0005654)	Approved
Q9H9A5	ENSG00000182973	CNOT10	Approved			Centrosome;Cytosol;Nucleoplasm					Centrosome (GO:0005813);Cytosol (GO:0005829);Nucleoplasm (GO:0005654)	Approved
Q9H9G7	ENSG00000126070	AGO3	Supported		Cytoplasmic bodies	Nucleoplasm					Cytoplasmic bodies (GO:0036464);Nucleoplasm (GO:0005654)	Approved
Q9HAH7	ENSG00000156860	FBRS	Approved			Nucleoplasm					Nucleoplasm (GO:0005654)	Approved
Q9HCJ0	ENSG00000078687	TNRC6C	Approved			Nucleus					Nucleus (GO:0005634)	Approved
Q9HCM7	ENSG00000112787	FBRSL1	Approved			Cytosol;Nucleus;Plasma membrane					Cytosol (GO:0005829);Nucleus (GO:0005634);Plasma membrane (GO:0005886)	Approved
Q9NP50	ENSG00000139146	FAM60A	Approved			Cytosol;Nucleoplasm					Cytosol (GO:0005829);Nucleoplasm (GO:0005654)	Approved
Q9NP66	ENSG00000140382	HMG20A	Approved			Nucleus					Nucleus (GO:0005634)	Approved
Q9NQC7	ENSG00000083799	CYLD	Supported		Microtubule organizing center	Nucleoplasm		Nucleoplasm			Microtubule organizing center (GO:0005815);Nucleoplasm (GO:0005654)	Approved
Q9NRZ9	ENSG00000119969	HELLS	Approved			Golgi apparatus;Nucleus;Vesicles		Golgi apparatus;Nucleus;Vesicles			Golgi apparatus (GO:0005794);Nucleus (GO:0005634);Vesicles (GO:0043231)	Approved
Q9NSC2	ENSG00000103449	SALL1	Approved			Cytosol;Nucleus					Cytosol (GO:0005829);Nucleus (GO:0005634)	Approved
Q9NUA8	ENSG00000184677	ZBTB40	Approved			Nucleus					Nucleus (GO:0005634)	Approved
Q9NVC6	ENSG00000042429	MED17	Approved			Nucleoplasm;Vesicles					Nucleoplasm (GO:0005654);Vesicles (GO:0043231)	Approved
Q9NZM4	ENSG00000063169	GLTSCR1	Approved			Nucleoplasm					Nucleoplasm (GO:0005654)	Approved
Q9NZN8	ENSG00000111596	CNOT2	Approved			Cytosol;Nucleus					Cytosol (GO:0005829);Nucleus (GO:0005634)	Approved
Q9NZR1	ENSG00000128872	TMOD2	Approved			Nucleoli fibrillar center;Nucleus					Nucleoli fibrillar center (GO:0001650);Nucleus (GO:0005634)	Approved
Q9P2I0	ENSG00000165934	CPSF2	Approved			Nucleoplasm;Vesicles					Nucleoplasm (GO:0005654);Vesicles (GO:0043231)	Approved
Q9P2J5	ENSG00000133706	LARS	Supported		Cytosol	Nuclear bodies		Cytosol		N/A (custom data)	Cytosol (GO:0005829);Nuclear bodies (GO:0016604)	Approved
Q9P2K3	ENSG00000117625	RCOR3	Approved			Nucleoli;Nucleus					Nucleoli (GO:0005730);Nucleus (GO:0005634)	Approved
Q9P2N5	ENSG00000091009	RBM27	Approved			Nuclear speckles					Nuclear speckles (GO:0016607)	Approved
Q9UBB9	ENSG00000100109	TFIP11	Approved			Cytosol;Nucleoplasm					Cytosol (GO:0005829);Nucleoplasm (GO:0005654)	Approved
Q9UBW7	ENSG00000121741	ZMYM2	Approved			Endoplasmic reticulum;Nucleoplasm					Endoplasmic reticulum (GO:0005783);Nucleoplasm (GO:0005654)	Approved
Q9UEE9	ENSG00000153774	CFDP1	Approved			Nucleoplasm	Vesicles				Nucleoplasm (GO:0005654);Vesicles (GO:0043231)	Approved
Q9UHA2	ENSG00000008324	SS18L2	Approved			Mitochondria;Nucleoli;Nucleus		Mitochondria			Mitochondria (GO:0005739);Nucleoli (GO:0005730);Nucleus (GO:0005634)	Approved
Q9UIU6	ENSG00000100625	SIX4	Approved			Nucleoplasm					Nucleoplasm (GO:0005654)	Approved
Q9UK53	ENSG00000153487	ING1	Approved			Cytosol;Nucleoplasm					Cytosol (GO:0005829);Nucleoplasm (GO:0005654)	Approved
Q9UKJ3	ENSG00000186566	GPATCH8	Approved			Mitochondria;Nuclear speckles					Mitochondria (GO:0005739);Nuclear speckles (GO:0016607)	Approved
Q9ULD9	ENSG00000168916	ZNF608	Approved			Cytosol;Nucleoplasm					Cytosol (GO:0005829);Nucleoplasm (GO:0005654)	Approved
Q9ULJ6	ENSG00000108175	ZMIZ1	Approved			Nucleoplasm;Vesicles					Nucleoplasm (GO:0005654);Vesicles (GO:0043231)	Approved
Q9ULK2	ENSG00000146776	ATXN7L1	Approved			Cytosol;Nucleus					Cytosol (GO:0005829);Nucleus (GO:0005634)	Approved
Q9ULM3	ENSG00000163872	YEATS2	Approved			Nucleoplasm					Nucleoplasm (GO:0005654)	Approved
Q9ULU4	ENSG00000101040	ZMYND8	Approved			Golgi apparatus;Nucleoplasm					Golgi apparatus (GO:0005794);Nucleoplasm (GO:0005654)	Approved
Q9UM82	ENSG00000158480	SPATA2	Approved			Nucleoli fibrillar center;Nucleus		Nucleoli fibrillar center			Nucleoli fibrillar center (GO:0001650);Nucleus (GO:0005634)	Approved
Q9UMN6	ENSG00000272333	KMT2B	Approved			Cytosol;Nucleoplasm					Cytosol (GO:0005829);Nucleoplasm (GO:0005654)	Approved
Q9UNF0	ENSG00000100266	PACSIN2	Supported		Plasma membrane;Vesicles	Cytosol;Nuclear speckles					Cytosol (GO:0005829);Nuclear speckles (GO:0016607);Plasma membrane (GO:0005886);Vesicles (GO:0043231)	Approved
Q9UPN9	ENSG00000197323	TRIM33	Approved			Nucleoplasm;Vesicles					Nucleoplasm (GO:0005654);Vesicles (GO:0043231)	Approved
Q9Y262	ENSG00000100129	EIF3L	Approved			Nucleoli;Nucleus					Nucleoli (GO:0005730);Nucleus (GO:0005634)	Approved
Q9Y281	ENSG00000165410	CFL2	Approved			Cytosol;Nucleoplasm;Plasma membrane		Cytosol;Plasma membrane			Cytosol (GO:0005829);Nucleoplasm (GO:0005654);Plasma membrane (GO:0005886)	Approved
Q9Y3B9	ENSG00000067533	RRP15	Approved			Mitochondria;Nucleoli;Nucleus					Mitochondria (GO:0005739);Nucleoli (GO:0005730);Nucleus (GO:0005634)	Approved
Q9Y3C6	ENSG00000137168	PPIL1	Approved			Nucleoli					Nucleoli (GO:0005730)	Approved
Q9Y3Y4	ENSG00000171016	PYGO1	Approved			Cytosol;Nucleoplasm					Cytosol (GO:0005829);Nucleoplasm (GO:0005654)	Approved
Q9Y467	ENSG00000165821	SALL2	Approved			Nucleus;Vesicles					Nucleus (GO:0005634);Vesicles (GO:0043231)	Approved
Q9Y4E5	ENSG00000112200	ZNF451	Approved			Nucleus					Nucleus (GO:0005634)	Approved
Q9Y4X4	ENSG00000118922	KLF12	Approved			Cytosol;Nucleoplasm					Cytosol (GO:0005829);Nucleoplasm (GO:0005654)	Approved
Q9Y5K5	ENSG00000116750	UCHL5	Approved			Mitochondria;Nucleoplasm					Mitochondria (GO:0005739);Nucleoplasm (GO:0005654)	Approved
Q9Y5L4	ENSG00000099800	TIMM13	Supported		Mitochondria	Nucleoli fibrillar center					Mitochondria (GO:0005739);Nucleoli fibrillar center (GO:0001650)	Approved
Q9Y6J0	ENSG00000099991	CABIN1	Approved			Aggresome;Cytosol;Nucleoplasm					Aggresome (GO:0016235);Cytosol (GO:0005829);Nucleoplasm (GO:0005654)	Approved
O00268	ENSG00000130699	TAF4	Enhanced	Nucleoplasm							Nucleoplasm (GO:0005654)	enhanced
O00567	ENSG00000101361	NOP56	Enhanced	Nucleoli fibrillar center							Nucleoli fibrillar center (GO:0001650)	enhanced
O14497	ENSG00000117713	ARID1A	Enhanced	Nucleoplasm							Nucleoplasm (GO:0005654)	enhanced
O14593	ENSG00000064490	RFXANK	Enhanced	Nucleoplasm							Nucleoplasm (GO:0005654)	enhanced
O14776	ENSG00000113649	TCERG1	Enhanced	Nucleoplasm							Nucleoplasm (GO:0005654)	enhanced
O15014	ENSG00000180357	ZNF609	Enhanced	Nucleoplasm		Cytosol					Cytosol (GO:0005829);Nucleoplasm (GO:0005654)	enhanced
O15164	ENSG00000122779	TRIM24	Enhanced	Nucleoplasm							Nucleoplasm (GO:0005654)	enhanced
O15355	ENSG00000115241	PPM1G	Enhanced	Nucleoplasm							Nucleoplasm (GO:0005654)	enhanced
O15409	ENSG00000128573	FOXP2	Enhanced	Nucleoplasm							Nucleoplasm (GO:0005654)	enhanced
O43390	ENSG00000125944	HNRNPR	Enhanced	Nucleoplasm							Nucleoplasm (GO:0005654)	enhanced
O43592	ENSG00000184575	XPOT	Enhanced	Cytosol;Nucleoplasm							Cytosol (GO:0005829);Nucleoplasm (GO:0005654)	enhanced
O43829	ENSG00000198081	ZBTB14	Enhanced	Nucleus	Nucleoli		Cytosol	Nucleoli;Nucleus			Cytosol (GO:0005829);Nucleoli (GO:0005730);Nucleus (GO:0005634)	enhanced
O60216	ENSG00000164754	RAD21	Enhanced	Nucleoplasm							Nucleoplasm (GO:0005654)	enhanced
O60248	ENSG00000129194	SOX15	Supported	Nucleus		Golgi apparatus;Nucleoli;Vesicles					Golgi apparatus (GO:0005794);Nucleoli (GO:0005730);Nucleus (GO:0005634);Vesicles (GO:0043231)	enhanced
O60341	ENSG00000004487	KDM1A	Enhanced	Nucleoplasm		Cytosol					Cytosol (GO:0005829);Nucleoplasm (GO:0005654)	enhanced
O75362	ENSG00000171940	ZNF217	Enhanced	Nuclear speckles							Nuclear speckles (GO:0016607)	enhanced
O75376	ENSG00000141027	NCOR1	Enhanced	Cytosol;Nucleoplasm							Cytosol (GO:0005829);Nucleoplasm (GO:0005654)	enhanced
O75400	ENSG00000196504	PRPF40A	Enhanced	Nuclear speckles							Nuclear speckles (GO:0016607)	enhanced
O75529	ENSG00000135801	TAF5L	Enhanced	Nuclear speckles	Cytoplasmic bodies						Cytoplasmic bodies (GO:0036464);Nuclear speckles (GO:0016607)	enhanced
O75683	ENSG00000148296	SURF6	Enhanced	Nucleoli		Nucleus					Nucleoli (GO:0005730);Nucleus (GO:0005634)	enhanced
O76021	ENSG00000171490	RSL1D1	Enhanced	Nucleoli							Nucleoli (GO:0005730)	enhanced
O94888	ENSG00000163960	UBXN7	Enhanced	Nucleoplasm							Nucleoplasm (GO:0005654)	enhanced
O95104	ENSG00000156304	SCAF4	Enhanced	Nucleoplasm							Nucleoplasm (GO:0005654)	enhanced
O95391	ENSG00000164609	SLU7	Enhanced	Nucleoplasm	Nuclear speckles						Nuclear speckles (GO:0016607);Nucleoplasm (GO:0005654)	enhanced
O95400	ENSG00000169217	CD2BP2	Enhanced	Cytosol;Nuclear speckles				Nuclear speckles			Cytosol (GO:0005829);Nuclear speckles (GO:0016607)	enhanced
O95785	ENSG00000011451	WIZ	Enhanced	Nucleoplasm		Midbody				Midbody (biological definition)	Midbody (GO:0030496);Nucleoplasm (GO:0005654)	enhanced
O96019	ENSG00000136518	ACTL6A	Enhanced	Nucleoplasm			Cytosol				Cytosol (GO:0005829);Nucleoplasm (GO:0005654)	enhanced
P01106	ENSG00000136997	MYC	Enhanced	Nucleoplasm							Nucleoplasm (GO:0005654)	enhanced
P04637	ENSG00000141510	TP53	Enhanced	Nucleoplasm				Nucleoplasm			Nucleoplasm (GO:0005654)	enhanced
P05412	ENSG00000177606	JUN	Enhanced	Nucleoplasm				Nucleoplasm			Nucleoplasm (GO:0005654)	enhanced
P06400	ENSG00000139687	RB1	Enhanced	Nucleoplasm							Nucleoplasm (GO:0005654)	enhanced
P06454	ENSG00000187514	PTMA	Enhanced	Cytosol;Nucleus							Cytosol (GO:0005829);Nucleus (GO:0005634)	enhanced
P06748	ENSG00000181163	NPM1	Enhanced	Nucleoli	Nucleus				Nucleoli;Nucleus		Nucleoli (GO:0005730);Nucleus (GO:0005634)	enhanced
P07910	ENSG00000092199	HNRNPC	Enhanced	Nucleoplasm							Nucleoplasm (GO:0005654)	enhanced
P08047	ENSG00000185591	SP1	Enhanced	Nucleoplasm							Nucleoplasm (GO:0005654)	enhanced
P08621	ENSG00000104852	SNRNP70	Enhanced	Nucleoplasm				Nucleoplasm			Nucleoplasm (GO:0005654)	enhanced
P08651	ENSG00000141905	NFIC	Enhanced	Nucleus	Nucleoli fibrillar center						Nucleoli fibrillar center (GO:0001650);Nucleus (GO:0005634)	enhanced
P09012	ENSG00000077312	SNRPA	Enhanced	Nucleoplasm							Nucleoplasm (GO:0005654)	enhanced
P09651	ENSG00000135486	HNRNPA1	Enhanced	Nucleoplasm							Nucleoplasm (GO:0005654)	enhanced
P0C7T5	ENSG00000224470	ATXN1L	Enhanced	Nucleus							Nucleus (GO:0005634)	enhanced
P10244	ENSG00000101057	MYBL2	Enhanced	Cytosol;Nucleoplasm				Nucleoplasm			Cytosol (GO:0005829);Nucleoplasm (GO:0005654)	enhanced
P12956	ENSG00000196419	XRCC6	Enhanced	Nucleoplasm				Nucleoplasm			Nucleoplasm (GO:0005654)	enhanced
P13010	ENSG00000079246	XRCC5	Enhanced	Nucleoplasm							Nucleoplasm (GO:0005654)	enhanced
P14921	ENSG00000134954	ETS1	Enhanced	Nucleoplasm				Nucleoplasm			Nucleoplasm (GO:0005654)	enhanced
P15923	ENSG00000071564	TCF3	Enhanced	Nucleoplasm							Nucleoplasm (GO:0005654)	enhanced
P16220	ENSG00000118260	CREB1	Enhanced	Nucleoplasm							Nucleoplasm (GO:0005654)	enhanced
P17480	ENSG00000108312	UBTF	Enhanced	Nucleoli fibrillar center							Nucleoli fibrillar center (GO:0001650)	enhanced
P17844	ENSG00000108654	DDX5	Enhanced	Nucleoplasm				Nucleoplasm			Nucleoplasm (GO:0005654)	enhanced
P18846	ENSG00000123268	ATF1	Enhanced	Nucleoplasm				Nucleoplasm			Nucleoplasm (GO:0005654)	enhanced
P20248	ENSG00000145386	CCNA2	Enhanced	Cytosol;Nucleoplasm				Nucleoplasm	Cytosol;Nucleoplasm		Cytosol (GO:0005829);Nucleoplasm (GO:0005654)	enhanced
P21675	ENSG00000147133	TAF1	Enhanced	Nucleoplasm							Nucleoplasm (GO:0005654)	enhanced
P22087	ENSG00000105202	FBL	Enhanced	Nucleoli fibrillar center							Nucleoli fibrillar center (GO:0001650)	enhanced
P22626	ENSG00000122566	HNRNPA2B1	Enhanced	Nucleoplasm							Nucleoplasm (GO:0005654)	enhanced
P23511	ENSG00000001167	NFYA	Enhanced	Nucleoplasm							Nucleoplasm (GO:0005654)	enhanced
P25440	ENSG00000204256	BRD2	Enhanced	Nuclear speckles							Nuclear speckles (GO:0016607)	enhanced
P26367	ENSG00000007372	PAX6	Enhanced	Nucleoplasm							Nucleoplasm (GO:0005654)	enhanced
P26373	ENSG00000167526	RPL13	Enhanced	Cytosol;Endoplasmic reticulum;Nucleoli							Cytosol (GO:0005829);Endoplasmic reticulum (GO:0005783);Nucleoli (GO:0005730)	enhanced
P28347	ENSG00000187079	TEAD1	Enhanced	Nucleoplasm							Nucleoplasm (GO:0005654)	enhanced
P29590	ENSG00000140464	PML	Enhanced	Nuclear bodies							Nuclear bodies (GO:0016604)	enhanced
P31274	ENSG00000180806	HOXC9	Enhanced	Nucleoplasm							Nucleoplasm (GO:0005654)	enhanced
P35251	ENSG00000035928	RFC1	Enhanced	Nucleus							Nucleus (GO:0005634)	enhanced
P35637	ENSG00000089280	FUS	Enhanced	Nucleoplasm							Nucleoplasm (GO:0005654)	enhanced
P36402	ENSG00000081059	TCF7	Enhanced	Nucleoplasm							Nucleoplasm (GO:0005654)	enhanced
P37231	ENSG00000132170	PPARG	Enhanced	Nucleus;Vesicles							Nucleus (GO:0005634);Vesicles (GO:0043231)	enhanced
P40424	ENSG00000185630	PBX1	Enhanced	Nucleoplasm							Nucleoplasm (GO:0005654)	enhanced
P41212	ENSG00000139083	ETV6	Enhanced	Nucleoli	Cytosol						Cytosol (GO:0005829);Nucleoli (GO:0005730)	enhanced
P42224	ENSG00000115415	STAT1	Enhanced	Cytosol;Nucleoplasm							Cytosol (GO:0005829);Nucleoplasm (GO:0005654)	enhanced
P46013	ENSG00000148773	MKI67	Enhanced	Nuclear bodies;Nucleoli;Nucleus					Nuclear bodies;Nucleoli;Nucleus		Nuclear bodies (GO:0016604);Nucleoli (GO:0005730);Nucleus (GO:0005634)	enhanced
P47914	ENSG00000162244	RPL29	Enhanced	Cytosol;Endoplasmic reticulum;Nucleoli							Cytosol (GO:0005829);Endoplasmic reticulum (GO:0005783);Nucleoli (GO:0005730)	enhanced
P48436	ENSG00000125398	SOX9	Enhanced	Nucleoplasm				Nucleoplasm			Nucleoplasm (GO:0005654)	enhanced
P49116	ENSG00000177463	NR2C2	Enhanced	Nucleoplasm							Nucleoplasm (GO:0005654)	enhanced
P49756	ENSG00000119707	RBM25	Enhanced	Nuclear speckles							Nuclear speckles (GO:0016607)	enhanced
P50402	ENSG00000102119	EMD	Enhanced	Nuclear membrane	Endoplasmic reticulum						Endoplasmic reticulum (GO:0005783);Nuclear membrane (GO:0031965)	enhanced
P50548	ENSG00000105722	ERF	Enhanced	Nucleoplasm							Nucleoplasm (GO:0005654)	enhanced
P51991	ENSG00000170144	HNRNPA3	Enhanced	Nucleoplasm							Nucleoplasm (GO:0005654)	enhanced
P52272	ENSG00000099783	HNRNPM	Enhanced	Nucleoplasm							Nucleoplasm (GO:0005654)	enhanced
P52739	ENSG00000172262	ZNF131	Enhanced	Nucleoplasm	Intermediate filaments			Intermediate filaments			Intermediate filaments (GO:0045111);Nucleoplasm (GO:0005654)	enhanced
P54198	ENSG00000100084	HIRA	Enhanced	Nucleoplasm							Nucleoplasm (GO:0005654)	enhanced
P54259	ENSG00000111676	ATN1	Enhanced	Nucleoplasm							Nucleoplasm (GO:0005654)	enhanced
P56270	ENSG00000103495	MAZ	Enhanced	Nucleus							Nucleus (GO:0005634)	enhanced
P57682	ENSG00000109787	KLF3	Enhanced	Nucleoplasm							Nucleoplasm (GO:0005654)	enhanced
P61457	ENSG00000166228	PCBD1	Enhanced	Cytosol;Nucleoplasm							Cytosol (GO:0005829);Nucleoplasm (GO:0005654)	enhanced
P63244	ENSG00000204628	RACK1	Enhanced	Cytosol;Nucleoplasm							Cytosol (GO:0005829);Nucleoplasm (GO:0005654)	enhanced
P78316	ENSG00000087269	NOP14	Enhanced	Nucleoli;Nucleus							Nucleoli (GO:0005730);Nucleus (GO:0005634)	enhanced
P78545	ENSG00000163435	ELF3	Enhanced	Nucleoplasm				Nucleoplasm			Nucleoplasm (GO:0005654)	enhanced
P98175	ENSG00000182872	RBM10	Enhanced	Nuclear speckles							Nuclear speckles (GO:0016607)	enhanced
Q01094	ENSG00000101412	E2F1	Enhanced	Nucleoplasm	Centrosome						Centrosome (GO:0005813);Nucleoplasm (GO:0005654)	enhanced
Q01844	ENSG00000182944	EWSR1	Enhanced	Nucleus	Nucleoli			Nucleoli			Nucleoli (GO:0005730);Nucleus (GO:0005634)	enhanced
Q02086	ENSG00000167182	SP2	Enhanced	Nucleoplasm;Vesicles							Nucleoplasm (GO:0005654);Vesicles (GO:0043231)	enhanced
Q02241	ENSG00000137807	KIF23	Enhanced	Nucleoplasm				Nucleoplasm		N/A (custom data);Nucleoplasm (correlation)	Nucleoplasm (GO:0005654)	enhanced
Q02556	ENSG00000140968	IRF8	Enhanced	Nucleoplasm				Nucleoplasm			Nucleoplasm (GO:0005654)	enhanced
Q02790	ENSG00000004478	FKBP4	Enhanced	Cytosol;Nucleoplasm							Cytosol (GO:0005829);Nucleoplasm (GO:0005654)	enhanced
Q05048	ENSG00000101138	CSTF1	Enhanced	Nucleoplasm							Nucleoplasm (GO:0005654)	enhanced
Q06546	ENSG00000154727	GABPA	Enhanced	Nucleoplasm							Nucleoplasm (GO:0005654)	enhanced
Q06710	ENSG00000125618	PAX8	Enhanced	Nucleoplasm							Nucleoplasm (GO:0005654)	enhanced
Q07666	ENSG00000121774	KHDRBS1	Enhanced	Nucleoplasm							Nucleoplasm (GO:0005654)	enhanced
Q08211	ENSG00000135829	DHX9	Enhanced	Nucleus							Nucleus (GO:0005634)	enhanced
Q09472	ENSG00000100393	EP300	Enhanced	Nucleoplasm							Nucleoplasm (GO:0005654)	enhanced
Q10570	ENSG00000071894	CPSF1	Enhanced	Nucleoplasm				Nucleoplasm			Nucleoplasm (GO:0005654)	enhanced
Q12830	ENSG00000171634	BPTF	Enhanced	Nucleoplasm							Nucleoplasm (GO:0005654)	enhanced
Q12857	ENSG00000162599	NFIA	Enhanced	Nucleoplasm							Nucleoplasm (GO:0005654)	enhanced
Q12888	ENSG00000067369	TP53BP1	Enhanced	Nuclear bodies		Nucleoplasm		Nuclear bodies;Nucleoplasm		N/A (custom data)	Nuclear bodies (GO:0016604);Nucleoplasm (GO:0005654)	enhanced
Q13148	ENSG00000120948	TARDBP	Enhanced	Nucleoplasm							Nucleoplasm (GO:0005654)	enhanced
Q13151	ENSG00000177733	HNRNPA0	Enhanced	Nucleoplasm				Nucleoplasm		N/A (custom data)	Nucleoplasm (GO:0005654)	enhanced
Q13330	ENSG00000182979	MTA1	Enhanced	Nucleoplasm	Cytosol						Cytosol (GO:0005829);Nucleoplasm (GO:0005654)	enhanced
Q13356	ENSG00000100023	PPIL2	Enhanced	Nucleoplasm							Nucleoplasm (GO:0005654)	enhanced
Q13363	ENSG00000159692	CTBP1	Enhanced	Nucleoplasm							Nucleoplasm (GO:0005654)	enhanced
Q13573	ENSG00000100603	SNW1	Enhanced	Nucleoplasm							Nucleoplasm (GO:0005654)	enhanced
Q13601	ENSG00000111615	KRR1	Enhanced	Nucleoli;Nucleus				Nucleoli			Nucleoli (GO:0005730);Nucleus (GO:0005634)	enhanced
Q13823	ENSG00000134697	GNL2	Enhanced	Nucleoli							Nucleoli (GO:0005730)	enhanced
Q14202	ENSG00000147130	ZMYM3	Enhanced	Nucleoplasm							Nucleoplasm (GO:0005654)	enhanced
Q14683	ENSG00000072501	SMC1A	Enhanced	Nucleoplasm			Cytosol				Cytosol (GO:0005829);Nucleoplasm (GO:0005654)	enhanced
Q14684	ENSG00000160208	RRP1B	Enhanced	Nucleoli							Nucleoli (GO:0005730)	enhanced
Q14692	ENSG00000165733	BMS1	Enhanced	Nucleoli;Nucleus							Nucleoli (GO:0005730);Nucleus (GO:0005634)	enhanced
Q14814	ENSG00000116604	MEF2D	Enhanced	Nucleoplasm							Nucleoplasm (GO:0005654)	enhanced
Q14966	ENSG00000075292	ZNF638	Enhanced	Nucleoplasm	Vesicles						Nucleoplasm (GO:0005654);Vesicles (GO:0043231)	enhanced
Q14980	ENSG00000137497	NUMA1	Enhanced	Nucleoplasm							Nucleoplasm (GO:0005654)	enhanced
Q15014	ENSG00000123562	MORF4L2	Enhanced	Nucleus							Nucleus (GO:0005634)	enhanced
Q15047	ENSG00000143379	SETDB1	Enhanced	Nucleoplasm			Cytosol				Cytosol (GO:0005829);Nucleoplasm (GO:0005654)	enhanced
Q15291	ENSG00000117222	RBBP5	Enhanced	Nucleoli;Nucleus				Nucleoli			Nucleoli (GO:0005730);Nucleus (GO:0005634)	enhanced
Q15562	ENSG00000074219	TEAD2	Enhanced	Nucleoplasm							Nucleoplasm (GO:0005654)	enhanced
Q15788	ENSG00000084676	NCOA1	Enhanced	Cytosol;Nucleoplasm;Plasma membrane				Nucleoplasm;Plasma membrane	Cytosol;Nucleoplasm;Plasma membrane	N/A (custom data)	Cytosol (GO:0005829);Nucleoplasm (GO:0005654);Plasma membrane (GO:0005886)	enhanced
Q29RF7	ENSG00000121892	PDS5A	Enhanced	Nucleoplasm							Nucleoplasm (GO:0005654)	enhanced
Q3T8J9	ENSG00000116580	GON4L	Enhanced	Nuclear bodies;Nucleoplasm							Nuclear bodies (GO:0016604);Nucleoplasm (GO:0005654)	enhanced
Q49A26	ENSG00000140632	GLYR1	Enhanced	Nucleoplasm	Nuclear speckles						Nuclear speckles (GO:0016607);Nucleoplasm (GO:0005654)	enhanced
Q5BKZ1	ENSG00000162664	ZNF326	Enhanced	Golgi apparatus;Nucleoplasm;Vesicles							Golgi apparatus (GO:0005794);Nucleoplasm (GO:0005654);Vesicles (GO:0043231)	enhanced
Q5H9R7	ENSG00000110075	PPP6R3	Enhanced	Cytosol;Nucleoplasm;Plasma membrane							Cytosol (GO:0005829);Nucleoplasm (GO:0005654);Plasma membrane (GO:0005886)	enhanced
Q68DK7	ENSG00000188895	MSL1	Enhanced	Nucleoplasm							Nucleoplasm (GO:0005654)	enhanced
Q69YH5	ENSG00000184661	CDCA2	Enhanced	Nucleoplasm				Nucleoplasm		N/A (custom data)	Nucleoplasm (GO:0005654)	enhanced
Q6P4R8	ENSG00000170322	NFRKB	Enhanced	Nucleus				Nucleus			Nucleus (GO:0005634)	enhanced
Q6PII3	ENSG00000154781	CCDC174	Enhanced	Nucleoplasm							Nucleoplasm (GO:0005654)	enhanced
Q6PJG2	ENSG00000156030	ELMSAN1	Enhanced	Nucleoplasm							Nucleoplasm (GO:0005654)	enhanced
Q6STE5	ENSG00000082014	SMARCD3	Enhanced	Nucleoplasm				Nucleoplasm			Nucleoplasm (GO:0005654)	enhanced
Q6VMQ6	ENSG00000171681	ATF7IP	Enhanced	Nuclear bodies;Nucleoplasm							Nuclear bodies (GO:0016604);Nucleoplasm (GO:0005654)	enhanced
Q6W2J9	ENSG00000183337	BCOR	Enhanced	Nucleus							Nucleus (GO:0005634)	enhanced
Q76L83	ENSG00000143970	ASXL2	Enhanced	Nucleoplasm							Nucleoplasm (GO:0005654)	enhanced
Q7Z3K3	ENSG00000143442	POGZ	Enhanced	Nucleoplasm							Nucleoplasm (GO:0005654)	enhanced
Q7Z589	ENSG00000158636	EMSY	Enhanced	Nucleoplasm							Nucleoplasm (GO:0005654)	enhanced
Q7Z5L9	ENSG00000168264	IRF2BP2	Enhanced	Nucleoplasm							Nucleoplasm (GO:0005654)	enhanced
Q7Z6E9	ENSG00000122257	RBBP6	Enhanced	Nuclear speckles							Nuclear speckles (GO:0016607)	enhanced
Q7Z6Z7	ENSG00000086758	HUWE1	Enhanced	Cytosol;Nucleoplasm							Cytosol (GO:0005829);Nucleoplasm (GO:0005654)	enhanced
Q7Z7C8	ENSG00000137413	TAF8	Enhanced	Nucleoplasm							Nucleoplasm (GO:0005654)	enhanced
Q86T24	ENSG00000177485	ZBTB33	Enhanced	Cytosol;Nucleus;Plasma membrane							Cytosol (GO:0005829);Nucleus (GO:0005634);Plasma membrane (GO:0005886)	enhanced
Q86UU0	ENSG00000186174	BCL9L	Enhanced	Nucleoplasm							Nucleoplasm (GO:0005654)	enhanced
Q86V81	ENSG00000183684	ALYREF	Enhanced	Nuclear speckles							Nuclear speckles (GO:0016607)	enhanced
Q86YP4	ENSG00000167491	GATAD2A	Enhanced	Nucleoplasm							Nucleoplasm (GO:0005654)	enhanced
Q8IWS0	ENSG00000156531	PHF6	Enhanced	Nucleoli;Nucleus							Nucleoli (GO:0005730);Nucleus (GO:0005634)	enhanced
Q8IWZ8	ENSG00000105705	SUGP1	Enhanced	Nucleoplasm							Nucleoplasm (GO:0005654)	enhanced
Q8IX01	ENSG00000064607	SUGP2	Enhanced	Nucleoplasm		Nuclear bodies					Nuclear bodies (GO:0016604);Nucleoplasm (GO:0005654)	enhanced
Q8IY81	ENSG00000108592	FTSJ3	Enhanced	Nucleoli				Nucleoli			Nucleoli (GO:0005730)	enhanced
Q8N108	ENSG00000198160	MIER1	Enhanced	Nucleoplasm							Nucleoplasm (GO:0005654)	enhanced
Q8N1G0	ENSG00000143373	ZNF687	Enhanced	Nucleoplasm				Nucleoplasm			Nucleoplasm (GO:0005654)	enhanced
Q8N9T8	ENSG00000129347	KRI1	Enhanced	Nucleoli				Nucleoli			Nucleoli (GO:0005730)	enhanced
Q8NFZ5	ENSG00000168884	TNIP2	Enhanced	Cytosol;Nucleoplasm							Cytosol (GO:0005829);Nucleoplasm (GO:0005654)	enhanced
Q8NHZ8	ENSG00000176386	CDC26	Enhanced	Nucleoplasm							Nucleoplasm (GO:0005654)	enhanced
Q8TAQ2	ENSG00000139613	SMARCC2	Enhanced	Nucleoplasm							Nucleoplasm (GO:0005654)	enhanced
Q8TE76	ENSG00000133131	MORC4	Enhanced	Nucleoplasm				Nucleoplasm			Nucleoplasm (GO:0005654)	enhanced
Q8TEK3	ENSG00000104885	DOT1L	Enhanced	Nucleoplasm							Nucleoplasm (GO:0005654)	enhanced
Q8WTT2	ENSG00000173145	NOC3L	Enhanced	Nucleoli	Nucleus						Nucleoli (GO:0005730);Nucleus (GO:0005634)	enhanced
Q8WXI9	ENSG00000143614	GATAD2B	Enhanced	Nucleoplasm							Nucleoplasm (GO:0005654)	enhanced
Q8WY36	ENSG00000114439	BBX	Enhanced	Cytosol;Nucleoplasm							Cytosol (GO:0005829);Nucleoplasm (GO:0005654)	enhanced
Q92522	ENSG00000184897	H1FX	Enhanced	Nucleoli;Nucleus							Nucleoli (GO:0005730);Nucleus (GO:0005634)	enhanced
Q92560	ENSG00000163930	BAP1	Enhanced	Nucleoplasm	Cytosol						Cytosol (GO:0005829);Nucleoplasm (GO:0005654)	enhanced
Q92585	ENSG00000161021	MAML1	Enhanced	Nucleoplasm							Nucleoplasm (GO:0005654)	enhanced
Q92733	ENSG00000143294	PRCC	Enhanced	Nuclear speckles							Nuclear speckles (GO:0016607)	enhanced
Q92784	ENSG00000205683	DPF3	Enhanced	Nucleoplasm							Nucleoplasm (GO:0005654)	enhanced
Q92793	ENSG00000005339	CREBBP	Enhanced	Nuclear bodies;Nucleoplasm				Nuclear bodies			Nuclear bodies (GO:0016604);Nucleoplasm (GO:0005654)	enhanced
Q92804	ENSG00000270647	TAF15	Enhanced	Nucleoplasm							Nucleoplasm (GO:0005654)	enhanced
Q92841	ENSG00000100201	DDX17	Enhanced	Nuclear speckles							Nuclear speckles (GO:0016607)	enhanced
Q92878	ENSG00000113522	RAD50	Enhanced	Nucleoplasm							Nucleoplasm (GO:0005654)	enhanced
Q92922	ENSG00000173473	SMARCC1	Enhanced	Nucleoplasm							Nucleoplasm (GO:0005654)	enhanced
Q92925	ENSG00000108604	SMARCD2	Enhanced	Nucleoplasm							Nucleoplasm (GO:0005654)	enhanced
Q92945	ENSG00000088247	KHSRP	Enhanced	Nucleoplasm							Nucleoplasm (GO:0005654)	enhanced
Q96AE4	ENSG00000162613	FUBP1	Enhanced	Nucleoplasm							Nucleoplasm (GO:0005654)	enhanced
Q96DN6	ENSG00000166987	MBD6	Enhanced	Nucleus							Nucleus (GO:0005634)	enhanced
Q96DT7	ENSG00000205189	ZBTB10	Enhanced	Nucleoplasm							Nucleoplasm (GO:0005654)	enhanced
Q96EB6	ENSG00000096717	SIRT1	Enhanced	Cytosol;Mitochondria;Nucleus							Cytosol (GO:0005829);Mitochondria (GO:0005739);Nucleus (GO:0005634)	enhanced
Q96EK4	ENSG00000168286	THAP11	Enhanced	Cytokinetic bridge;Nucleoplasm				Cytokinetic bridge		Cytokinetic bridge (biological definition)	Cytokinetic bridge (GO:0045171);Nucleoplasm (GO:0005654)	enhanced
Q96GA3	ENSG00000135521	LTV1	Enhanced	Cytosol;Nucleoplasm							Cytosol (GO:0005829);Nucleoplasm (GO:0005654)	enhanced
Q96JM7	ENSG00000198945	L3MBTL3	Enhanced	Nucleoli;Nucleus							Nucleoli (GO:0005730);Nucleus (GO:0005634)	enhanced
Q96ME7	ENSG00000243943	ZNF512	Enhanced	Nucleus							Nucleus (GO:0005634)	enhanced
Q96MY1	ENSG00000197183	NOL4L	Enhanced	Nucleoplasm							Nucleoplasm (GO:0005654)	enhanced
Q96PN7	ENSG00000124496	TRERF1	Enhanced	Nucleoplasm			Cytosol				Cytosol (GO:0005829);Nucleoplasm (GO:0005654)	enhanced
Q96QT6	ENSG00000109118	PHF12	Enhanced	Nucleoplasm							Nucleoplasm (GO:0005654)	enhanced
Q96RE7	ENSG00000160877	NACC1	Enhanced	Nucleoplasm							Nucleoplasm (GO:0005654)	enhanced
Q96RL1	ENSG00000087206	UIMC1	Enhanced	Nuclear bodies							Nuclear bodies (GO:0016604)	enhanced
Q96ST3	ENSG00000169375	SIN3A	Enhanced	Nucleoplasm							Nucleoplasm (GO:0005654)	enhanced
Q96T58	ENSG00000065526	SPEN	Enhanced	Nucleoplasm							Nucleoplasm (GO:0005654)	enhanced
Q99496	ENSG00000121481	RNF2	Enhanced	Nucleoplasm	Nuclear bodies						Nuclear bodies (GO:0016604);Nucleoplasm (GO:0005654)	enhanced
Q99504	ENSG00000158161	EYA3	Enhanced	Nucleoplasm							Nucleoplasm (GO:0005654)	enhanced
Q99583	ENSG00000070444	MNT	Enhanced	Nucleoplasm							Nucleoplasm (GO:0005654)	enhanced
Q99590	ENSG00000139218	SCAF11	Enhanced	Nucleoplasm	Nuclear bodies						Nuclear bodies (GO:0016604);Nucleoplasm (GO:0005654)	enhanced
Q99729	ENSG00000197451	HNRNPAB	Enhanced	Nucleoplasm							Nucleoplasm (GO:0005654)	enhanced
Q99848	ENSG00000117395	EBNA1BP2	Enhanced	Nucleoli							Nucleoli (GO:0005730)	enhanced
Q9BQ39	ENSG00000107625	DDX50	Enhanced	Nucleoli							Nucleoli (GO:0005730)	enhanced
Q9BRR0	ENSG00000189298	ZKSCAN3	Enhanced	Nucleoplasm				Nucleoplasm			Nucleoplasm (GO:0005654)	enhanced
Q9BRT6	ENSG00000139233	LLPH	Enhanced	Nucleoli							Nucleoli (GO:0005730)	enhanced
Q9BSM1	ENSG00000115289	PCGF1	Enhanced	Nucleoplasm							Nucleoplasm (GO:0005654)	enhanced
Q9BUL5	ENSG00000040633	PHF23	Enhanced	Nucleoplasm							Nucleoplasm (GO:0005654)	enhanced
Q9BVP2	ENSG00000163938	GNL3	Enhanced	Nucleoli		Nuclear bodies		Nuclear bodies		N/A (custom data)	Nuclear bodies (GO:0016604);Nucleoli (GO:0005730)	enhanced
Q9BXP5	ENSG00000087087	SRRT	Enhanced	Nucleoplasm							Nucleoplasm (GO:0005654)	enhanced
Q9BXS6	ENSG00000137804	NUSAP1	Enhanced	Nucleus	Nucleoli fibrillar center			Nucleoli fibrillar center;Nucleus		N/A (custom data);Nucleoli fibrillar center (correlation);Nucleus (correlation)	Nucleoli fibrillar center (GO:0001650);Nucleus (GO:0005634)	enhanced
Q9BY77	ENSG00000100227	POLDIP3	Enhanced	Nuclear speckles	Cytoplasmic bodies						Cytoplasmic bodies (GO:0036464);Nuclear speckles (GO:0016607)	enhanced
Q9BYG3	ENSG00000155438	NIFK	Enhanced	Nucleoli							Nucleoli (GO:0005730)	enhanced
Q9BZE4	ENSG00000107937	GTPBP4	Enhanced	Nucleoli		Nuclear membrane		Nuclear membrane;Nucleoli			Nuclear membrane (GO:0031965);Nucleoli (GO:0005730)	enhanced
Q9C005	ENSG00000162961	DPY30	Enhanced	Golgi apparatus;Nucleoplasm							Golgi apparatus (GO:0005794);Nucleoplasm (GO:0005654)	enhanced
Q9H0A0	ENSG00000135372	NAT10	Enhanced	Nucleoli	Midbody					Midbody (biological definition)	Midbody (GO:0030496);Nucleoli (GO:0005730)	enhanced
Q9H0D6	ENSG00000088930	XRN2	Enhanced	Nucleoli;Nucleus							Nucleoli (GO:0005730);Nucleus (GO:0005634)	enhanced
Q9H0H5	ENSG00000161800	RACGAP1	Enhanced	Nucleoplasm				Nucleoplasm			Nucleoplasm (GO:0005654)	enhanced
Q9H147	ENSG00000101457	DNTTIP1	Enhanced	Nucleus				Nucleus			Nucleus (GO:0005634)	enhanced
Q9H165	ENSG00000119866	BCL11A	Enhanced	Nucleoplasm	Nuclear bodies						Nuclear bodies (GO:0016604);Nucleoplasm (GO:0005654)	enhanced
Q9H1B7	ENSG00000119669	IRF2BPL	Enhanced	Nucleoplasm							Nucleoplasm (GO:0005654)	enhanced
Q9H307	ENSG00000100941	PNN	Enhanced	Nuclear speckles							Nuclear speckles (GO:0016607)	enhanced
Q9H334	ENSG00000114861	FOXP1	Enhanced	Nucleoplasm							Nucleoplasm (GO:0005654)	enhanced
Q9H6F5	ENSG00000110104	CCDC86	Enhanced	Nucleoli;Nucleus				Nucleoli;Nucleus			Nucleoli (GO:0005730);Nucleus (GO:0005634)	enhanced
Q9HAZ2	ENSG00000142611	PRDM16	Enhanced	Nucleoplasm							Nucleoplasm (GO:0005654)	enhanced
Q9HB71	ENSG00000116161	CACYBP	Enhanced	Cytosol;Nucleoplasm							Cytosol (GO:0005829);Nucleoplasm (GO:0005654)	enhanced
Q9NR56	ENSG00000152601	MBNL1	Enhanced	Nucleoplasm	Cytosol						Cytosol (GO:0005829);Nucleoplasm (GO:0005654)	enhanced
Q9NS91	ENSG00000070950	RAD18	Enhanced	Nuclear bodies;Nucleoplasm							Nuclear bodies (GO:0016604);Nucleoplasm (GO:0005654)	enhanced
Q9NTZ6	ENSG00000244462	RBM12	Enhanced	Nucleoplasm							Nucleoplasm (GO:0005654)	enhanced
Q9NVP1	ENSG00000088205	DDX18	Enhanced	Nucleoli							Nucleoli (GO:0005730)	enhanced
Q9NW13	ENSG00000106344	RBM28	Enhanced	Nucleoli							Nucleoli (GO:0005730)	enhanced
Q9NZM5	ENSG00000105373	GLTSCR2	Enhanced	Nucleoli							Nucleoli (GO:0005730)	enhanced
Q9P0U4	ENSG00000154832	CXXC1	Enhanced	Nucleus							Nucleus (GO:0005634)	enhanced
Q9P0W2	ENSG00000064961	HMG20B	Enhanced	Nucleoplasm							Nucleoplasm (GO:0005654)	enhanced
Q9P2N6	ENSG00000114982	KANSL3	Enhanced	Nucleus							Nucleus (GO:0005634)	enhanced
Q9UBB5	ENSG00000134046	MBD2	Enhanced	Nucleoplasm							Nucleoplasm (GO:0005654)	enhanced
Q9UKD1	ENSG00000101216	GMEB2	Enhanced	Nucleoplasm							Nucleoplasm (GO:0005654)	enhanced
Q9UKL0	ENSG00000089902	RCOR1	Enhanced	Nucleoplasm							Nucleoplasm (GO:0005654)	enhanced
Q9UKY1	ENSG00000165156	ZHX1	Enhanced	Nucleoplasm				Nucleoplasm			Nucleoplasm (GO:0005654)	enhanced
Q9ULG1	ENSG00000128908	INO80	Enhanced	Nuclear bodies;Nucleoplasm							Nuclear bodies (GO:0016604);Nucleoplasm (GO:0005654)	enhanced
Q9ULJ3	ENSG00000173276	ZBTB21	Enhanced	Nucleus							Nucleus (GO:0005634)	enhanced
Q9ULW0	ENSG00000088325	TPX2	Enhanced	Cytokinetic bridge;Microtubule organizing center;Mitotic spindle;Nucleoplasm				Nucleoplasm		Cytokinetic bridge (biological definition);Mitotic spindle (biological definition);N/A (custom data)	Cytokinetic bridge (GO:0045171);Microtubule organizing center (GO:0005815);Mitotic spindle (GO:0072686);Nucleoplasm (GO:0005654)	enhanced
Q9UN79	ENSG00000143842	SOX13	Enhanced	Nucleoplasm							Nucleoplasm (GO:0005654)	enhanced
Q9UPN6	ENSG00000213079	SCAF8	Enhanced	Nucleoplasm							Nucleoplasm (GO:0005654)	enhanced
Q9Y253	ENSG00000170734	POLH	Enhanced	Nucleoplasm			Cytosol				Cytosol (GO:0005829);Nucleoplasm (GO:0005654)	enhanced
Q9Y294	ENSG00000111875	ASF1A	Enhanced	Nucleus				Nucleus		N/A (custom data)	Nucleus (GO:0005634)	enhanced
Q9Y2W2	ENSG00000084463	WBP11	Enhanced	Nucleoplasm							Nucleoplasm (GO:0005654)	enhanced
Q9Y2X3	ENSG00000055044	NOP58	Enhanced	Nucleoli fibrillar center	Nucleus						Nucleoli fibrillar center (GO:0001650);Nucleus (GO:0005634)	enhanced
Q9Y2X9	ENSG00000162702	ZNF281	Enhanced	Nucleoplasm							Nucleoplasm (GO:0005654)	enhanced
Q9Y314	ENSG00000142546	NOSIP	Enhanced	Nucleus							Nucleus (GO:0005634)	enhanced
Q9Y3C1	ENSG00000048162	NOP16	Enhanced	Nucleoli							Nucleoli (GO:0005730)	enhanced
Q9Y603	ENSG00000010030	ETV7	Enhanced	Nucleoplasm							Nucleoplasm (GO:0005654)	enhanced
Q9Y692	ENSG00000162419	GMEB1	Enhanced	Nucleoplasm							Nucleoplasm (GO:0005654)	enhanced
Q9Y6X8	ENSG00000178764	ZHX2	Enhanced	Nucleoplasm							Nucleoplasm (GO:0005654)	enhanced
O00159	ENSG00000197879	MYO1C	Enhanced	Plasma membrane	Nuclear bodies						Nuclear bodies (GO:0016604);Plasma membrane (GO:0005886)	Supported
O00221	ENSG00000146232	NFKBIE	Supported		Cytosol;Nucleoli fibrillar center;Nucleus						Cytosol (GO:0005829);Nucleoli fibrillar center (GO:0001650);Nucleus (GO:0005634)	Supported
O00712	ENSG00000147862	NFIB	Supported		Nucleoli fibrillar center;Nucleus						Nucleoli fibrillar center (GO:0001650);Nucleus (GO:0005634)	Supported
O00716	ENSG00000112242	E2F3	Supported		Nuclear speckles;Nucleoplasm		Cytosol				Cytosol (GO:0005829);Nuclear speckles (GO:0016607);Nucleoplasm (GO:0005654)	Supported
O15047	ENSG00000099381	SETD1A	Supported		Nuclear speckles						Nuclear speckles (GO:0016607)	Supported
O15178	ENSG00000164458	T	Supported		Nucleus						Nucleus (GO:0005634)	Supported
O15226	ENSG00000186416	NKRF	Supported		Nucleoli	Nucleus					Nucleoli (GO:0005730);Nucleus (GO:0005634)	Supported
O15265	ENSG00000163635	ATXN7	Supported		Cytosol;Nucleoplasm						Cytosol (GO:0005829);Nucleoplasm (GO:0005654)	Supported
O15294	ENSG00000147162	OGT	Supported		Nucleoplasm;Plasma membrane						Nucleoplasm (GO:0005654);Plasma membrane (GO:0005886)	Supported
O15379	ENSG00000171720	HDAC3	Supported		Golgi apparatus;Nucleoplasm						Golgi apparatus (GO:0005794);Nucleoplasm (GO:0005654)	Supported
O43248	ENSG00000123388	HOXC11	Supported		Nucleoplasm	Cytosol					Cytosol (GO:0005829);Nucleoplasm (GO:0005654)	Supported
O43474	ENSG00000136826	KLF4	Supported		Nucleoplasm						Nucleoplasm (GO:0005654)	Supported
O43711	ENSG00000164438	TLX3	Supported		Nucleoplasm			Nucleoplasm			Nucleoplasm (GO:0005654)	Supported
O43823	ENSG00000105127	AKAP8	Supported		Nucleoplasm						Nucleoplasm (GO:0005654)	Supported
O60264	ENSG00000153147	SMARCA5	Supported		Nucleus	Nucleoli fibrillar center		Nucleoli fibrillar center			Nucleoli fibrillar center (GO:0001650);Nucleus (GO:0005634)	Supported
O60783	ENSG00000120333	MRPS14	Supported		Mitochondria;Nuclear membrane						Mitochondria (GO:0005739);Nuclear membrane (GO:0031965)	Supported
O75177	ENSG00000184402	SS18L1	Supported		Cytosol;Nucleoplasm						Cytosol (GO:0005829);Nucleoplasm (GO:0005654)	Supported
O75179	ENSG00000132466	ANKRD17	Supported		Nucleus	Nuclear membrane		Nucleus			Nuclear membrane (GO:0031965);Nucleus (GO:0005634)	Supported
O75398	ENSG00000177030	DEAF1	Supported		Nucleus	Nucleoli fibrillar center					Nucleoli fibrillar center (GO:0001650);Nucleus (GO:0005634)	Supported
O75461	ENSG00000169016	E2F6	Supported		Nucleoplasm						Nucleoplasm (GO:0005654)	Supported
O75486	ENSG00000196284	SUPT3H	Supported		Nucleoplasm						Nucleoplasm (GO:0005654)	Supported
O75528	ENSG00000171148	TADA3	Supported		Nucleoplasm						Nucleoplasm (GO:0005654)	Supported
O75928	ENSG00000078043	PIAS2	Supported		Nucleoplasm			Nucleoplasm			Nucleoplasm (GO:0005654)	Supported
O94762	ENSG00000108469	RECQL5	Supported		Cytosol;Nucleus						Cytosol (GO:0005829);Nucleus (GO:0005634)	Supported
O94818	ENSG00000101746	NOL4	Supported		Nucleus			Nucleus			Nucleus (GO:0005634)	Supported
O94913	ENSG00000165494	PCF11	Supported		Nucleoplasm	Mitochondria					Mitochondria (GO:0005739);Nucleoplasm (GO:0005654)	Supported
O95478	ENSG00000164346	NSA2	Supported		Nucleoli;Nucleus			Nucleoli;Nucleus			Nucleoli (GO:0005730);Nucleus (GO:0005634)	Supported
O95551	ENSG00000111802	TDP2	Supported		Nuclear bodies;Nucleoplasm			Nuclear bodies			Nuclear bodies (GO:0016604);Nucleoplasm (GO:0005654)	Supported
O95600	ENSG00000102349	KLF8	Supported		Nucleoplasm						Nucleoplasm (GO:0005654)	Supported
O95639	ENSG00000160917	CPSF4	Supported		Nucleoplasm						Nucleoplasm (GO:0005654)	Supported
P01100	ENSG00000170345	FOS	Supported		Nucleoplasm			Nucleoplasm			Nucleoplasm (GO:0005654)	Supported
P08708	ENSG00000182774	RPS17	Supported		Cytosol;Endoplasmic reticulum;Nucleoli						Cytosol (GO:0005829);Endoplasmic reticulum (GO:0005783);Nucleoli (GO:0005730)	Supported
P09429	ENSG00000189403	HMGB1	Supported		Nucleus			Nucleus			Nucleus (GO:0005634)	Supported
P0C0S5	ENSG00000164032	H2AFZ	Supported		Nucleoplasm						Nucleoplasm (GO:0005654)	Supported
P0C1Z6	ENSG00000105619	TFPT	Supported		Nuclear membrane;Nucleoplasm						Nuclear membrane (GO:0031965);Nucleoplasm (GO:0005654)	Supported
P10070	ENSG00000074047	GLI2	Supported		Nucleoli;Nucleus			Nucleoli			Nucleoli (GO:0005730);Nucleus (GO:0005634)	Supported
P10242	ENSG00000118513	MYB	Approved		Nucleus		Plasma membrane				Nucleus (GO:0005634);Plasma membrane (GO:0005886)	Supported
P10412	ENSG00000168298	HIST1H1E	Supported		Nuclear speckles						Nuclear speckles (GO:0016607)	Supported
P10914	ENSG00000125347	IRF1	Supported		Cytosol;Nucleoplasm						Cytosol (GO:0005829);Nucleoplasm (GO:0005654)	Supported
P11387	ENSG00000198900	TOP1	Supported		Nucleoli fibrillar center;Nucleus			Nucleoli fibrillar center;Nucleus			Nucleoli fibrillar center (GO:0001650);Nucleus (GO:0005634)	Supported
P12755	ENSG00000157933	SKI	Supported		Nuclear bodies;Nucleoplasm						Nuclear bodies (GO:0016604);Nucleoplasm (GO:0005654)	Supported
P13056	ENSG00000120798	NR2C1	Supported		Nucleus	Cell Junctions;Cytosol					Cell Junctions (GO:0030054);Cytosol (GO:0005829);Nucleus (GO:0005634)	Supported
P14678	ENSG00000125835	SNRPB	Supported		Nucleoplasm						Nucleoplasm (GO:0005654)	Supported
P14859	ENSG00000143190	POU2F1	Supported		Nucleoplasm;Vesicles	Endoplasmic reticulum		Vesicles			Endoplasmic reticulum (GO:0005783);Nucleoplasm (GO:0005654);Vesicles (GO:0043231)	Supported
P14866	ENSG00000104824	HNRNPL	Enhanced		Nucleoplasm						Nucleoplasm (GO:0005654)	Supported
P15172	ENSG00000129152	MYOD1	Supported		Nuclear bodies;Nucleoplasm		Cytosol				Cytosol (GO:0005829);Nuclear bodies (GO:0016604);Nucleoplasm (GO:0005654)	Supported
P15822	ENSG00000095951	HIVEP1	Supported		Nuclear bodies;Nucleoplasm	Mitochondria					Mitochondria (GO:0005739);Nuclear bodies (GO:0016604);Nucleoplasm (GO:0005654)	Supported
P15884	ENSG00000196628	TCF4	Supported		Nucleoplasm	Cytosol					Cytosol (GO:0005829);Nucleoplasm (GO:0005654)	Supported
P16615	ENSG00000174437	ATP2A2	Supported		Nucleoplasm						Nucleoplasm (GO:0005654)	Supported
P17028	ENSG00000172466	ZNF24	Supported		Nucleus						Nucleus (GO:0005634)	Supported
P17535	ENSG00000130522	JUND	Supported		Nucleus			Nucleus			Nucleus (GO:0005634)	Supported
P17542	ENSG00000162367	TAL1	Supported		Nucleus			Nucleus			Nucleus (GO:0005634)	Supported
P19532	ENSG00000068323	TFE3	Supported		Nucleoplasm	Cytosol					Cytosol (GO:0005829);Nucleoplasm (GO:0005654)	Supported
P19793	ENSG00000186350	RXRA	Supported		Golgi apparatus;Nucleus						Golgi apparatus (GO:0005794);Nucleus (GO:0005634)	Supported
P19838	ENSG00000109320	NFKB1	Supported		Cytosol;Nucleoplasm						Cytosol (GO:0005829);Nucleoplasm (GO:0005654)	Supported
P20226	ENSG00000112592	TBP	Supported		Nucleoplasm						Nucleoplasm (GO:0005654)	Supported
P20823	ENSG00000135100	HNF1A	Supported		Nucleoplasm						Nucleoplasm (GO:0005654)	Supported
P22670	ENSG00000132005	RFX1	Supported		Nucleoplasm						Nucleoplasm (GO:0005654)	Supported
P23769	ENSG00000179348	GATA2	Supported		Nucleoplasm						Nucleoplasm (GO:0005654)	Supported
P23771	ENSG00000107485	GATA3	Supported		Nucleoplasm						Nucleoplasm (GO:0005654)	Supported
P25208	ENSG00000120837	NFYB	Supported		Nucleoplasm						Nucleoplasm (GO:0005654)	Supported
P25490	ENSG00000100811	YY1	Supported		Nucleoli fibrillar center;Nucleoplasm	Vesicles			Nucleoli fibrillar center		Nucleoli fibrillar center (GO:0001650);Nucleoplasm (GO:0005654);Vesicles (GO:0043231)	Supported
P25789	ENSG00000041357	PSMA4	Enhanced		Cytosol;Nucleus	Vesicles			Cytosol;Nucleus;Vesicles		Cytosol (GO:0005829);Nucleus (GO:0005634);Vesicles (GO:0043231)	Supported
P26583	ENSG00000164104	HMGB2	Supported		Nucleus	Nucleoli					Nucleoli (GO:0005730);Nucleus (GO:0005634)	Supported
P26599	ENSG00000011304	PTBP1	Supported		Nucleoplasm						Nucleoplasm (GO:0005654)	Supported
P27540	ENSG00000143437	ARNT	Supported		Nuclear bodies;Nucleus						Nuclear bodies (GO:0016604);Nucleus (GO:0005634)	Supported
P27708	ENSG00000084774	CAD	Supported		Nucleoplasm			Nucleoplasm			Nucleoplasm (GO:0005654)	Supported
P28074	ENSG00000100804	PSMB5	Supported		Centrosome;Nucleus						Centrosome (GO:0005813);Nucleus (GO:0005634)	Supported
P28324	ENSG00000158711	ELK4	Supported		Nucleoplasm						Nucleoplasm (GO:0005654)	Supported
P28370	ENSG00000102038	SMARCA1	Supported		Nucleoplasm	Vesicles					Nucleoplasm (GO:0005654);Vesicles (GO:0043231)	Supported
P29374	ENSG00000032219	ARID4A	Supported		Nucleoplasm	Cytosol;Plasma membrane					Cytosol (GO:0005829);Nucleoplasm (GO:0005654);Plasma membrane (GO:0005886)	Supported
P29375	ENSG00000073614	KDM5A	Supported		Nuclear bodies	Cytosol					Cytosol (GO:0005829);Nuclear bodies (GO:0016604)	Supported
P31260	ENSG00000253293	HOXA10	Supported		Nuclear bodies;Nucleoplasm						Nuclear bodies (GO:0016604);Nucleoplasm (GO:0005654)	Supported
P31942	ENSG00000096746	HNRNPH3	Supported		Nucleoplasm						Nucleoplasm (GO:0005654)	Supported
P31948	ENSG00000168439	STIP1	Supported		Cytosol;Nucleoplasm;Plasma membrane						Cytosol (GO:0005829);Nucleoplasm (GO:0005654);Plasma membrane (GO:0005886)	Supported
P32519	ENSG00000120690	ELF1	Supported		Nucleoplasm						Nucleoplasm (GO:0005654)	Supported
P34932	ENSG00000170606	HSPA4	Supported		Cytosol;Nucleoplasm						Cytosol (GO:0005829);Nucleoplasm (GO:0005654)	Supported
P35658	ENSG00000126883	NUP214	Supported		Focal adhesion sites;Nucleus;Vesicles						Focal adhesion sites (GO:0005925);Nucleus (GO:0005634);Vesicles (GO:0043231)	Supported
P35680	ENSG00000275410	HNF1B	Supported		Nucleoplasm						Nucleoplasm (GO:0005654)	Supported
P35711	ENSG00000134532	SOX5	Supported		Nucleoplasm			Nucleoplasm			Nucleoplasm (GO:0005654)	Supported
P37198	ENSG00000213024	NUP62	Supported		Nuclear membrane	Nucleus					Nuclear membrane (GO:0031965);Nucleus (GO:0005634)	Supported
P37275	ENSG00000148516	ZEB1	Supported		Nucleoplasm						Nucleoplasm (GO:0005654)	Supported
P40763	ENSG00000168610	STAT3	Supported		Cytosol;Nucleoplasm						Cytosol (GO:0005829);Nucleoplasm (GO:0005654)	Supported
P41161	ENSG00000244405	ETV5	Supported		Nucleoplasm						Nucleoplasm (GO:0005654)	Supported
P41235	ENSG00000101076	HNF4A	Supported		Nucleoplasm			Nucleoplasm			Nucleoplasm (GO:0005654)	Supported
P41970	ENSG00000111145	ELK3	Supported		Nucleoplasm	Mitochondria					Mitochondria (GO:0005739);Nucleoplasm (GO:0005654)	Supported
P42696	ENSG00000188739	RBM34	Supported		Nucleoli;Nucleus						Nucleoli (GO:0005730);Nucleus (GO:0005634)	Supported
P43268	ENSG00000175832	ETV4	Supported		Nucleoli						Nucleoli (GO:0005730)	Supported
P43694	ENSG00000136574	GATA4	Supported		Nuclear bodies						Nuclear bodies (GO:0016604)	Supported
P46087	ENSG00000111641	NOP2	Supported		Nucleoli			Nucleoli		N/A (custom data)	Nucleoli (GO:0005730)	Supported
P46100	ENSG00000085224	ATRX	Supported		Nuclear bodies						Nuclear bodies (GO:0016604)	Supported
P46937	ENSG00000137693	YAP1	Supported		Nucleoli;Nucleus						Nucleoli (GO:0005730);Nucleus (GO:0005634)	Supported
P48431	ENSG00000181449	SOX2	Supported		Nucleoplasm						Nucleoplasm (GO:0005654)	Supported
P48634	ENSG00000204469	PRRC2A	Approved		Cytosol;Nucleoplasm		Plasma membrane				Cytosol (GO:0005829);Nucleoplasm (GO:0005654);Plasma membrane (GO:0005886)	Supported
P49207	ENSG00000109475	RPL34	Supported		Cytosol;Endoplasmic reticulum;Nucleoli						Cytosol (GO:0005829);Endoplasmic reticulum (GO:0005783);Nucleoli (GO:0005730)	Supported
P49711	ENSG00000102974	CTCF	Supported		Nucleoplasm						Nucleoplasm (GO:0005654)	Supported
P49750	ENSG00000119596	YLPM1	Supported		Nuclear speckles;Nucleoplasm						Nuclear speckles (GO:0016607);Nucleoplasm (GO:0005654)	Supported
P49848	ENSG00000106290	TAF6	Supported		Nucleoplasm	Cytosol					Cytosol (GO:0005829);Nucleoplasm (GO:0005654)	Supported
P51531	ENSG00000080503	SMARCA2	Approved		Nucleoplasm		Intermediate filaments;Vesicles				Intermediate filaments (GO:0045111);Nucleoplasm (GO:0005654);Vesicles (GO:0043231)	Supported
P51532	ENSG00000127616	SMARCA4	Supported		Nucleoplasm						Nucleoplasm (GO:0005654)	Supported
P51610	ENSG00000172534	HCFC1	Supported		Mitochondria;Nucleoplasm						Mitochondria (GO:0005739);Nucleoplasm (GO:0005654)	Supported
P51617	ENSG00000184216	IRAK1	Supported		Cytosol;Nucleus				Cytosol;Nucleus		Cytosol (GO:0005829);Nucleus (GO:0005634)	Supported
P51784	ENSG00000102226	USP11	Supported		Nucleoplasm						Nucleoplasm (GO:0005654)	Supported
P52948	ENSG00000110713	NUP98	Supported		Nucleoplasm		Vesicles				Nucleoplasm (GO:0005654);Vesicles (GO:0043231)	Supported
P54132	ENSG00000197299	BLM	Supported		Nucleus	Cytosol					Cytosol (GO:0005829);Nucleus (GO:0005634)	Supported
P54253	ENSG00000124788	ATXN1	Supported		Cytosol;Nucleoli;Nucleus				Nucleoli;Nucleus		Cytosol (GO:0005829);Nucleoli (GO:0005730);Nucleus (GO:0005634)	Supported
P55197	ENSG00000078403	MLLT10	Supported		Nucleoplasm						Nucleoplasm (GO:0005654)	Supported
P55317	ENSG00000129514	FOXA1	Supported		Nucleoli fibrillar center;Nucleoplasm						Nucleoli fibrillar center (GO:0001650);Nucleoplasm (GO:0005654)	Supported
P55735	ENSG00000157020	SEC13	Supported		Nucleoplasm;Vesicles						Nucleoplasm (GO:0005654);Vesicles (GO:0043231)	Supported
P55771	ENSG00000198807	PAX9	Approved		Nucleoplasm	Mitochondria					Mitochondria (GO:0005739);Nucleoplasm (GO:0005654)	Supported
P56537	ENSG00000242372	EIF6	Supported		Nucleoplasm						Nucleoplasm (GO:0005654)	Supported
P56693	ENSG00000100146	SOX10	Supported		Nucleoplasm			Nucleoplasm			Nucleoplasm (GO:0005654)	Supported
P57052	ENSG00000185272	RBM11	Supported		Nucleoplasm						Nucleoplasm (GO:0005654)	Supported
P60900	ENSG00000100902	PSMA6	Supported		Nucleoplasm						Nucleoplasm (GO:0005654)	Supported
P61006	ENSG00000167461	RAB8A	Supported		Nucleus;Plasma membrane			Nucleus			Nucleus (GO:0005634);Plasma membrane (GO:0005886)	Supported
P61244	ENSG00000125952	MAX	Supported		Nucleoplasm	Golgi apparatus;Vesicles					Golgi apparatus (GO:0005794);Nucleoplasm (GO:0005654);Vesicles (GO:0043231)	Supported
P61326	ENSG00000162385	MAGOH	Supported		Nucleus						Nucleus (GO:0005634)	Supported
P61962	ENSG00000136485	DCAF7	Supported		Cytosol;Nucleoplasm						Cytosol (GO:0005829);Nucleoplasm (GO:0005654)	Supported
P61964	ENSG00000196363	WDR5	Supported		Nucleoplasm						Nucleoplasm (GO:0005654)	Supported
P61968	ENSG00000143013	LMO4	Supported		Nucleoplasm	Midbody ring				Midbody ring (biological definition)	Midbody ring (GO:0090543);Nucleoplasm (GO:0005654)	Supported
P62861	ENSG00000149806	FAU	Supported		Cytosol;Endoplasmic reticulum;Nucleoli			Cytosol			Cytosol (GO:0005829);Endoplasmic reticulum (GO:0005783);Nucleoli (GO:0005730)	Supported
P63165	ENSG00000116030	SUMO1	Supported		Nuclear bodies;Nuclear membrane;Nucleoli;Nucleus						Nuclear bodies (GO:0016604);Nuclear membrane (GO:0031965);Nucleoli (GO:0005730);Nucleus (GO:0005634)	Supported
P63208	ENSG00000113558	SKP1	Supported		Nucleus	Cytosol			Cytosol;Nucleus		Cytosol (GO:0005829);Nucleus (GO:0005634)	Supported
P78337	ENSG00000069011	PITX1	Supported		Nucleoli			Nucleoli			Nucleoli (GO:0005730)	Supported
P81877	ENSG00000145687	SSBP2	Supported		Nucleoplasm						Nucleoplasm (GO:0005654)	Supported
P83916	ENSG00000108468	CBX1	Supported		Nuclear bodies;Nucleus						Nuclear bodies (GO:0016604);Nucleus (GO:0005634)	Supported
P84103	ENSG00000112081	SRSF3	Supported		Nucleoplasm						Nucleoplasm (GO:0005654)	Supported
P85037	ENSG00000164916	FOXK1	Supported		Nucleoplasm	Nucleoli fibrillar center					Nucleoli fibrillar center (GO:0001650);Nucleoplasm (GO:0005654)	Supported
Q01167	ENSG00000141568	FOXK2	Supported		Nucleoplasm;Vesicles						Nucleoplasm (GO:0005654);Vesicles (GO:0043231)	Supported
Q01543	ENSG00000151702	FLI1	Supported		Nuclear bodies;Nucleus			Nuclear bodies			Nuclear bodies (GO:0016604);Nucleus (GO:0005634)	Supported
Q01664	ENSG00000090447	TFAP4	Supported		Nucleoplasm	Mitochondria					Mitochondria (GO:0005739);Nucleoplasm (GO:0005654)	Supported
Q01826	ENSG00000182568	SATB1	Supported		Nuclear bodies;Nucleoplasm						Nuclear bodies (GO:0016604);Nucleoplasm (GO:0005654)	Supported
Q02078	ENSG00000068305	MEF2A	Supported		Nucleoplasm						Nucleoplasm (GO:0005654)	Supported
Q02962	ENSG00000075891	PAX2	Supported		Nucleoli		Golgi apparatus				Golgi apparatus (GO:0005794);Nucleoli (GO:0005730)	Supported
Q03111	ENSG00000130382	MLLT1	Supported		Nucleoplasm						Nucleoplasm (GO:0005654)	Supported
Q03112	ENSG00000085276	MECOM	Supported		Nuclear speckles						Nuclear speckles (GO:0016607)	Supported
Q03164	ENSG00000118058	KMT2A	Supported		Nucleoplasm	Cytosol					Cytosol (GO:0005829);Nucleoplasm (GO:0005654)	Supported
Q04724	ENSG00000196781	TLE1	Supported		Nucleoplasm						Nucleoplasm (GO:0005654)	Supported
Q04726	ENSG00000140332	TLE3	Supported		Nucleoplasm						Nucleoplasm (GO:0005654)	Supported
Q04727	ENSG00000106829	TLE4	Supported		Nucleus			Nucleus			Nucleus (GO:0005634)	Supported
Q05925	ENSG00000163064	EN1	Supported		Nucleoli;Nucleus				Nucleoli		Nucleoli (GO:0005730);Nucleus (GO:0005634)	Supported
Q06330	ENSG00000168214	RBPJ	Supported		Nucleoplasm						Nucleoplasm (GO:0005654)	Supported
Q06945	ENSG00000124766	SOX4	Supported		Nucleoplasm	Mitochondria					Mitochondria (GO:0005739);Nucleoplasm (GO:0005654)	Supported
Q08117	ENSG00000104964	AES	Supported		Nucleoplasm						Nucleoplasm (GO:0005654)	Supported
Q12789	ENSG00000077235	GTF3C1	Supported		Nucleoli;Nucleus						Nucleoli (GO:0005730);Nucleus (GO:0005634)	Supported
Q12800	ENSG00000135457	TFCP2	Supported		Nucleoplasm		Cytosol				Cytosol (GO:0005829);Nucleoplasm (GO:0005654)	Supported
Q12824	ENSG00000099956	SMARCB1	Supported		Nucleoli fibrillar center;Nucleoplasm						Nucleoli fibrillar center (GO:0001650);Nucleoplasm (GO:0005654)	Supported
Q12906	ENSG00000129351	ILF3	Supported		Nucleoli;Nucleoplasm	Mitochondria			Mitochondria;Nucleoli;Nucleoplasm		Mitochondria (GO:0005739);Nucleoli (GO:0005730);Nucleoplasm (GO:0005654)	Supported
Q12948	ENSG00000054598	FOXC1	Supported		Nucleoplasm		Cytosol				Cytosol (GO:0005829);Nucleoplasm (GO:0005654)	Supported
Q12962	ENSG00000166337	TAF10	Supported		Nucleoplasm						Nucleoplasm (GO:0005654)	Supported
Q12968	ENSG00000072736	NFATC3	Supported		Cytosol;Nucleoplasm						Cytosol (GO:0005829);Nucleoplasm (GO:0005654)	Supported
Q13029	ENSG00000116731	PRDM2	Approved		Nucleus	Golgi apparatus					Golgi apparatus (GO:0005794);Nucleus (GO:0005634)	Supported
Q13227	ENSG00000132522	GPS2	Supported		Nucleoplasm						Nucleoplasm (GO:0005654)	Supported
Q13886	ENSG00000119138	KLF9	Approved		Nucleoplasm	Cytosol;Plasma membrane					Cytosol (GO:0005829);Nucleoplasm (GO:0005654);Plasma membrane (GO:0005886)	Supported
Q13887	ENSG00000102554	KLF5	Supported		Nucleoplasm		Golgi apparatus;Vesicles				Golgi apparatus (GO:0005794);Nucleoplasm (GO:0005654);Vesicles (GO:0043231)	Supported
Q13948	ENSG00000257923	CUX1	Supported		Golgi apparatus;Nucleoplasm						Golgi apparatus (GO:0005794);Nucleoplasm (GO:0005654)	Supported
Q13952	ENSG00000066136	NFYC	Supported		Nucleoplasm						Nucleoplasm (GO:0005654)	Supported
Q14119	ENSG00000136451	VEZF1	Enhanced		Nucleoplasm						Nucleoplasm (GO:0005654)	Supported
Q14186	ENSG00000198176	TFDP1	Supported		Cytosol;Nucleoplasm						Cytosol (GO:0005829);Nucleoplasm (GO:0005654)	Supported
Q14207	ENSG00000149308	NPAT	Supported		Nuclear bodies;Nucleoplasm						Nuclear bodies (GO:0016604);Nucleoplasm (GO:0005654)	Supported
Q14498	ENSG00000131051	RBM39	Supported		Nuclear speckles	Nucleoplasm	Microtubule organizing center;Microtubules				Microtubule organizing center (GO:0005815);Microtubules (GO:0015630);Nuclear speckles (GO:0016607);Nucleoplasm (GO:0005654)	Supported
Q14671	ENSG00000134644	PUM1	Supported		Cytosol;Nucleus						Cytosol (GO:0005829);Nucleus (GO:0005634)	Supported
Q14676	ENSG00000137337	MDC1	Supported		Nuclear bodies;Nucleoplasm			Nuclear bodies;Nucleoplasm			Nuclear bodies (GO:0016604);Nucleoplasm (GO:0005654)	Supported
Q14686	ENSG00000198646	NCOA6	Supported		Nucleoplasm						Nucleoplasm (GO:0005654)	Supported
Q14690	ENSG00000148843	PDCD11	Supported		Nucleoli	Vesicles					Nucleoli (GO:0005730);Vesicles (GO:0043231)	Supported
Q14781	ENSG00000173894	CBX2	Supported		Nucleoplasm						Nucleoplasm (GO:0005654)	Supported
Q14934	ENSG00000100968	NFATC4	Supported		Cytosol;Nuclear speckles				Cytosol		Cytosol (GO:0005829);Nuclear speckles (GO:0016607)	Supported
Q14938	ENSG00000008441	NFIX	Supported		Nucleoplasm						Nucleoplasm (GO:0005654)	Supported
Q15025	ENSG00000145901	TNIP1	Supported		Cytosol;Nucleoplasm						Cytosol (GO:0005829);Nucleoplasm (GO:0005654)	Supported
Q15072	ENSG00000167635	ZNF146	Supported		Nucleoli						Nucleoli (GO:0005730)	Supported
Q15306	ENSG00000137265	IRF4	Supported		Nucleoplasm						Nucleoplasm (GO:0005654)	Supported
Q15397	ENSG00000080608	PUM3	Supported		Nucleoli						Nucleoli (GO:0005730)	Supported
Q15542	ENSG00000148835	TAF5	Supported		Nucleoplasm						Nucleoplasm (GO:0005654)	Supported
Q15596	ENSG00000140396	NCOA2	Supported		Nuclear bodies;Nucleoplasm						Nuclear bodies (GO:0016604);Nucleoplasm (GO:0005654)	Supported
Q15717	ENSG00000066044	ELAVL1	Supported		Cytosol;Nucleoli;Nucleus			Nucleoli			Cytosol (GO:0005829);Nucleoli (GO:0005730);Nucleus (GO:0005634)	Supported
Q15723	ENSG00000109381	ELF2	Supported		Nuclear bodies;Nucleoplasm						Nuclear bodies (GO:0016604);Nucleoplasm (GO:0005654)	Supported
Q15906	ENSG00000163159	VPS72	Supported		Nuclear speckles						Nuclear speckles (GO:0016607)	Supported
Q2M1V0	ENSG00000175329	ISX	Supported		Nuclear bodies;Nucleoplasm						Nuclear bodies (GO:0016604);Nucleoplasm (GO:0005654)	Supported
Q3KNV8	ENSG00000185619	PCGF3	Supported		Nucleoplasm						Nucleoplasm (GO:0005654)	Supported
Q3ZCQ8	ENSG00000105197	TIMM50	Supported		Mitochondria;Nucleoplasm						Mitochondria (GO:0005739);Nucleoplasm (GO:0005654)	Supported
Q3ZCT1	ENSG00000254004	ZNF260	Supported		Nucleoplasm		Cytosol				Cytosol (GO:0005829);Nucleoplasm (GO:0005654)	Supported
Q5H9F3	ENSG00000085185	BCORL1	Approved		Nucleoplasm		Plasma membrane				Nucleoplasm (GO:0005654);Plasma membrane (GO:0005886)	Supported
Q5JTH9	ENSG00000052749	RRP12	Supported		Nucleoli						Nucleoli (GO:0005730)	Supported
Q5PSV4	ENSG00000100916	BRMS1L	Supported		Nucleoplasm						Nucleoplasm (GO:0005654)	Supported
Q5T3I0	ENSG00000160818	GPATCH4	Supported		Nucleoli;Nucleus						Nucleoli (GO:0005730);Nucleus (GO:0005634)	Supported
Q5T3J3	ENSG00000121931	LRIF1	Supported		Nucleus	Microtubule organizing center		Nucleus			Microtubule organizing center (GO:0005815);Nucleus (GO:0005634)	Supported
Q5TKA1	ENSG00000183814	LIN9	Supported		Nucleoplasm						Nucleoplasm (GO:0005654)	Supported
Q5UIP0	ENSG00000080345	RIF1	Uncertain		Nuclear bodies;Nucleus		Plasma membrane	Plasma membrane	Nuclear bodies;Nucleus		Nuclear bodies (GO:0016604);Nucleus (GO:0005634);Plasma membrane (GO:0005886)	Supported
Q5VUA4	ENSG00000171467	ZNF318	Supported		Nucleoplasm		Cytosol				Cytosol (GO:0005829);Nucleoplasm (GO:0005654)	Supported
Q5VWG9	ENSG00000165632	TAF3	Supported		Nucleoplasm	Nuclear membrane					Nuclear membrane (GO:0031965);Nucleoplasm (GO:0005654)	Supported
Q5VWQ0	ENSG00000081019	RSBN1	Supported		Nucleoplasm	Nuclear bodies;Vesicles					Nuclear bodies (GO:0016604);Nucleoplasm (GO:0005654);Vesicles (GO:0043231)	Supported
Q5VZL5	ENSG00000146463	ZMYM4	Supported		Cytosol;Nucleoplasm						Cytosol (GO:0005829);Nucleoplasm (GO:0005654)	Supported
Q63HK5	ENSG00000121297	TSHZ3	Supported		Nucleoplasm						Nucleoplasm (GO:0005654)	Supported
Q68CP9	ENSG00000189079	ARID2	Supported		Nucleoplasm;Plasma membrane						Nucleoplasm (GO:0005654);Plasma membrane (GO:0005886)	Supported
Q6I9Y2	ENSG00000163634	THOC7	Supported		Cytosol;Nuclear speckles						Cytosol (GO:0005829);Nuclear speckles (GO:0016607)	Supported
Q6KC79	ENSG00000164190	NIPBL	Supported		Nucleoplasm	Vesicles					Nucleoplasm (GO:0005654);Vesicles (GO:0043231)	Supported
Q6NW34	ENSG00000163608	NEPRO	Supported		Nucleoli;Nucleus			Nucleus			Nucleoli (GO:0005730);Nucleus (GO:0005634)	Supported
Q6P1R3	ENSG00000120458	MSANTD2	Supported		Nuclear bodies;Nucleoplasm						Nuclear bodies (GO:0016604);Nucleoplasm (GO:0005654)	Supported
Q6P2E9	ENSG00000038358	EDC4	Enhanced	Cytoplasmic bodies	Nucleoplasm						Cytoplasmic bodies (GO:0036464);Nucleoplasm (GO:0005654)	Supported
Q6P2H3	ENSG00000130695	CEP85	Supported		Microtubule organizing center;Nucleoli	Cytosol	Golgi apparatus				Cytosol (GO:0005829);Golgi apparatus (GO:0005794);Microtubule organizing center (GO:0005815);Nucleoli (GO:0005730)	Supported
Q6PI98	ENSG00000153391	INO80C	Supported		Nucleoli fibrillar center						Nucleoli fibrillar center (GO:0001650)	Supported
Q6ZRS2	ENSG00000080603	SRCAP	Supported		Nuclear bodies;Nucleoplasm						Nuclear bodies (GO:0016604);Nucleoplasm (GO:0005654)	Supported
Q6ZU65	ENSG00000157741	UBN2	Supported		Nucleoplasm						Nucleoplasm (GO:0005654)	Supported
Q71UM5	ENSG00000185088	RPS27L	Supported		Cytosol;Endoplasmic reticulum;Nucleoli						Cytosol (GO:0005829);Endoplasmic reticulum (GO:0005783);Nucleoli (GO:0005730)	Supported
Q7Z3B3	ENSG00000120071	KANSL1	Supported		Nucleoplasm			Nucleoplasm			Nucleoplasm (GO:0005654)	Supported
Q86SE9	ENSG00000180628	PCGF5	Supported		Nucleoli						Nucleoli (GO:0005730)	Supported
Q86U86	ENSG00000163939	PBRM1	Supported		Nucleoplasm						Nucleoplasm (GO:0005654)	Supported
Q8IU81	ENSG00000170604	IRF2BP1	Supported		Nucleoplasm						Nucleoplasm (GO:0005654)	Supported
Q8IVW6	ENSG00000179361	ARID3B	Supported		Nucleoplasm						Nucleoplasm (GO:0005654)	Supported
Q8IWI9	ENSG00000174197	MGA	Supported		Cytosol;Nucleoplasm						Cytosol (GO:0005829);Nucleoplasm (GO:0005654)	Supported
Q8IX12	ENSG00000060339	CCAR1	Supported		Golgi apparatus;Nucleoplasm						Golgi apparatus (GO:0005794);Nucleoplasm (GO:0005654)	Supported
Q8IX15	ENSG00000215271	HOMEZ	Supported		Nucleoli;Nucleus						Nucleoli (GO:0005730);Nucleus (GO:0005634)	Supported
Q8IX18	ENSG00000108406	DHX40	Supported		Nucleus						Nucleus (GO:0005634)	Supported
Q8IY57	ENSG00000015153	YAF2	Supported		Nucleoplasm						Nucleoplasm (GO:0005654)	Supported
Q8IY67	ENSG00000161847	RAVER1	Supported		Nucleoplasm						Nucleoplasm (GO:0005654)	Supported
Q8IY92	ENSG00000188827	SLX4	Supported		Cell Junctions;Cytosol;Nucleoplasm						Cell Junctions (GO:0030054);Cytosol (GO:0005829);Nucleoplasm (GO:0005654)	Supported
Q8N488	ENSG00000163602	RYBP	Supported		Nucleoplasm						Nucleoplasm (GO:0005654)	Supported
Q8N684	ENSG00000149532	CPSF7	Supported		Cytosol;Nucleoplasm						Cytosol (GO:0005829);Nucleoplasm (GO:0005654)	Supported
Q8N9N5	ENSG00000172530	BANP	Supported		Nuclear bodies;Nucleoplasm						Nuclear bodies (GO:0016604);Nucleoplasm (GO:0005654)	Supported
Q8NBZ0	ENSG00000169592	INO80E	Supported		Nucleoli;Nucleoplasm						Nucleoli (GO:0005730);Nucleoplasm (GO:0005654)	Supported
Q8NDX5	ENSG00000173889	PHC3	Supported		Nucleus			Nucleus			Nucleus (GO:0005634)	Supported
Q8NEM7	ENSG00000102710	SUPT20H	Supported		Nucleoli fibrillar center						Nucleoli fibrillar center (GO:0001650)	Supported
Q8NEZ4	ENSG00000055609	KMT2C	Supported		Nucleoplasm						Nucleoplasm (GO:0005654)	Supported
Q8NF64	ENSG00000122515	ZMIZ2	Supported		Nucleoplasm						Nucleoplasm (GO:0005654)	Supported
Q8NFD5	ENSG00000049618	ARID1B	Supported		Nucleoplasm						Nucleoplasm (GO:0005654)	Supported
Q8TCN5	ENSG00000168813	ZNF507	Supported		Cytosol;Nucleoli						Cytosol (GO:0005829);Nucleoli (GO:0005730)	Supported
Q8TDI0	ENSG00000116254	CHD5	Supported		Nuclear speckles;Nucleoplasm	Cytosol					Cytosol (GO:0005829);Nuclear speckles (GO:0016607);Nucleoplasm (GO:0005654)	Supported
Q8WUA2	ENSG00000131013	PPIL4	Enhanced		Nucleoplasm						Nucleoplasm (GO:0005654)	Supported
Q8WUB8	ENSG00000130024	PHF10	Supported		Nucleus						Nucleus (GO:0005634)	Supported
Q8WUU5	ENSG00000157259	GATAD1	Supported		Nucleus			Nucleus			Nucleus (GO:0005634)	Supported
Q8WW38	ENSG00000169946	ZFPM2	Supported		Nucleoplasm						Nucleoplasm (GO:0005654)	Supported
Q92766	ENSG00000124782	RREB1	Supported		Nuclear speckles		Nucleoli fibrillar center				Nuclear speckles (GO:0016607);Nucleoli fibrillar center (GO:0001650)	Supported
Q92785	ENSG00000133884	DPF2	Supported		Nucleoplasm						Nucleoplasm (GO:0005654)	Supported
Q92889	ENSG00000175595	ERCC4	Supported		Nuclear bodies;Nucleoplasm						Nuclear bodies (GO:0016604);Nucleoplasm (GO:0005654)	Supported
Q92900	ENSG00000005007	UPF1	Supported		Nucleoplasm						Nucleoplasm (GO:0005654)	Supported
Q92908	ENSG00000141448	GATA6	Supported		Nucleus			Nucleus			Nucleus (GO:0005634)	Supported
Q92989	ENSG00000172409	CLP1	Supported		Nucleoplasm						Nucleoplasm (GO:0005654)	Supported
Q92993	ENSG00000172977	KAT5	Supported		Nucleoplasm						Nucleoplasm (GO:0005654)	Supported
Q969G3	ENSG00000073584	SMARCE1	Supported		Nucleoplasm						Nucleoplasm (GO:0005654)	Supported
Q96A65	ENSG00000131558	EXOC4	Supported		Nucleoli;Nucleus						Nucleoli (GO:0005730);Nucleus (GO:0005634)	Supported
Q96BN2	ENSG00000152382	TADA1	Supported		Nucleoplasm	Cytosol;Focal adhesion sites		Cytosol;Nucleoplasm			Cytosol (GO:0005829);Focal adhesion sites (GO:0005925);Nucleoplasm (GO:0005654)	Supported
Q96CB8	ENSG00000138785	INTS12	Approved		Nuclear bodies;Nucleoplasm		Cytosol;Plasma membrane				Cytosol (GO:0005829);Nuclear bodies (GO:0016604);Nucleoplasm (GO:0005654);Plasma membrane (GO:0005886)	Supported
Q96EZ8	ENSG00000187778	MCRS1	Supported		Nucleoplasm						Nucleoplasm (GO:0005654)	Supported
Q96GY3	ENSG00000267796	LIN37	Supported		Nucleoplasm						Nucleoplasm (GO:0005654)	Supported
Q96JB3	ENSG00000169635	HIC2	Supported		Nucleus						Nucleus (GO:0005634)	Supported
Q96JP5	ENSG00000186660	ZFP91	Supported		Nucleus	Nucleoli					Nucleoli (GO:0005730);Nucleus (GO:0005634)	Supported
Q96KQ4	ENSG00000088808	PPP1R13B	Supported		Cytosol;Nucleoplasm						Cytosol (GO:0005829);Nucleoplasm (GO:0005654)	Supported
Q96KQ7	ENSG00000204371	EHMT2	Supported		Nuclear speckles;Nucleoplasm						Nuclear speckles (GO:0016607);Nucleoplasm (GO:0005654)	Supported
Q96L91	ENSG00000183495	EP400	Supported		Nucleus						Nucleus (GO:0005634)	Supported
Q96PK6	ENSG00000239306	RBM14	Supported		Nuclear speckles						Nuclear speckles (GO:0016607)	Supported
Q96PU8	ENSG00000112531	QKI	Supported		Nucleoplasm						Nucleoplasm (GO:0005654)	Supported
Q96PV6	ENSG00000167615	LENG8	Supported		Nucleus						Nucleus (GO:0005634)	Supported
Q96RK0	ENSG00000079432	CIC	Supported		Nucleoplasm	Vesicles					Nucleoplasm (GO:0005654);Vesicles (GO:0043231)	Supported
Q96RN5	ENSG00000099917	MED15	Supported		Nucleus						Nucleus (GO:0005634)	Supported
Q99081	ENSG00000140262	TCF12	Supported		Nuclear speckles;Nucleoplasm						Nuclear speckles (GO:0016607);Nucleoplasm (GO:0005654)	Supported
Q99567	ENSG00000108559	NUP88	Supported		Nucleoplasm						Nucleoplasm (GO:0005654)	Supported
Q99581	ENSG00000163497	FEV	Supported		Nuclear speckles						Nuclear speckles (GO:0016607)	Supported
Q99607	ENSG00000102034	ELF4	Supported		Nuclear bodies	Nucleoplasm					Nuclear bodies (GO:0016604);Nucleoplasm (GO:0005654)	Supported
Q99717	ENSG00000113658	SMAD5	Supported		Cytosol;Nucleoplasm						Cytosol (GO:0005829);Nucleoplasm (GO:0005654)	Supported
Q99733	ENSG00000205531	NAP1L4	Supported		Nucleoplasm			Nucleoplasm			Nucleoplasm (GO:0005654)	Supported
Q99856	ENSG00000116017	ARID3A	Supported		Cytosol;Nucleoplasm	Vesicles					Cytosol (GO:0005829);Nucleoplasm (GO:0005654);Vesicles (GO:0043231)	Supported
Q9BTC8	ENSG00000057935	MTA3	Supported		Nucleus	Vesicles					Nucleus (GO:0005634);Vesicles (GO:0043231)	Supported
Q9BTT4	ENSG00000133398	MED10	Supported		Nucleoplasm						Nucleoplasm (GO:0005654)	Supported
Q9BVJ6	ENSG00000156697	UTP14A	Supported		Nucleoli		Cytosol				Cytosol (GO:0005829);Nucleoli (GO:0005730)	Supported
Q9BX82	ENSG00000196263	ZNF471	Supported		Nucleus						Nucleus (GO:0005634)	Supported
Q9BXK1	ENSG00000129911	KLF16	Supported		Nucleus						Nucleus (GO:0005634)	Supported
Q9BZB8	ENSG00000214575	CPEB1	Supported		Cytosol;Nucleoplasm						Cytosol (GO:0005829);Nucleoplasm (GO:0005654)	Supported
Q9C009	ENSG00000164379	FOXQ1	Supported		Nucleus			Nucleus			Nucleus (GO:0005634)	Supported
Q9C086	ENSG00000115274	INO80B	Supported		Nucleoli;Nucleus						Nucleoli (GO:0005730);Nucleus (GO:0005634)	Supported
Q9C0C9	ENSG00000175931	UBE2O	Supported		Nuclear bodies;Nucleus			Nuclear bodies			Nuclear bodies (GO:0016604);Nucleus (GO:0005634)	Supported
Q9C0J8	ENSG00000136709	WDR33	Supported		Nucleoli fibrillar center;Nucleoplasm						Nucleoli fibrillar center (GO:0001650);Nucleoplasm (GO:0005654)	Supported
Q9GZR2	ENSG00000148300	REXO4	Supported		Nucleoli;Nucleus						Nucleoli (GO:0005730);Nucleus (GO:0005634)	Supported
Q9H0E3	ENSG00000136715	SAP130	Supported		Nuclear speckles						Nuclear speckles (GO:0016607)	Supported
Q9H160	ENSG00000168556	ING2	Supported		Cytosol;Golgi apparatus;Nucleoplasm						Cytosol (GO:0005829);Golgi apparatus (GO:0005794);Nucleoplasm (GO:0005654)	Supported
Q9H2H8	ENSG00000240344	PPIL3	Supported		Nucleus						Nucleus (GO:0005634)	Supported
Q9H2U1	ENSG00000174953	DHX36	Supported		Cytosol;Nucleus						Cytosol (GO:0005829);Nucleus (GO:0005634)	Supported
Q9H2X6	ENSG00000064393	HIPK2	Supported		Nucleus						Nucleus (GO:0005634)	Supported
Q9H4I2	ENSG00000174306	ZHX3	Supported		Nucleoplasm						Nucleoplasm (GO:0005654)	Supported
Q9H5V7	ENSG00000095574	IKZF5	Supported		Cytosol;Nucleoplasm;Plasma membrane						Cytosol (GO:0005829);Nucleoplasm (GO:0005654);Plasma membrane (GO:0005886)	Supported
Q9H7L9	ENSG00000111707	SUDS3	Supported		Nuclear bodies	Cytosol					Cytosol (GO:0005829);Nuclear bodies (GO:0016604)	Supported
Q9H7Z6	ENSG00000103510	KAT8	Supported		Nucleoplasm						Nucleoplasm (GO:0005654)	Supported
Q9H8H2	ENSG00000125485	DDX31	Supported		Nucleoli	Golgi apparatus;Vesicles					Golgi apparatus (GO:0005794);Nucleoli (GO:0005730);Vesicles (GO:0043231)	Supported
Q9H981	ENSG00000113812	ACTR8	Supported		Nucleus	Centrosome					Centrosome (GO:0005813);Nucleus (GO:0005634)	Supported
Q9H9B1	ENSG00000181090	EHMT1	Supported		Nuclear bodies;Nucleoplasm			Nuclear bodies			Nuclear bodies (GO:0016604);Nucleoplasm (GO:0005654)	Supported
Q9H9L4	ENSG00000139620	KANSL2	Supported		Cytosol;Nucleoplasm;Plasma membrane						Cytosol (GO:0005829);Nucleoplasm (GO:0005654);Plasma membrane (GO:0005886)	Supported
Q9HCK8	ENSG00000100888	CHD8	Supported		Nucleoplasm						Nucleoplasm (GO:0005654)	Supported
Q9HCM1	ENSG00000174718	KIAA1551	Supported		Cytosol;Intermediate filaments;Nucleoli						Cytosol (GO:0005829);Intermediate filaments (GO:0045111);Nucleoli (GO:0005730)	Supported
Q9NPF5	ENSG00000178028	DMAP1	Supported		Cytosol;Nucleoplasm						Cytosol (GO:0005829);Nucleoplasm (GO:0005654)	Supported
Q9NPG3	ENSG00000118900	UBN1	Supported		Nuclear bodies;Nucleoplasm						Nuclear bodies (GO:0016604);Nucleoplasm (GO:0005654)	Supported
Q9NPI1	ENSG00000166164	BRD7	Supported		Cytosol;Nucleoplasm						Cytosol (GO:0005829);Nucleoplasm (GO:0005654)	Supported
Q9NPJ6	ENSG00000136146	MED4	Supported		Nucleoplasm						Nucleoplasm (GO:0005654)	Supported
Q9NQB0	ENSG00000148737	TCF7L2	Supported		Nuclear bodies	Nucleoplasm			Nuclear bodies		Nuclear bodies (GO:0016604);Nucleoplasm (GO:0005654)	Supported
Q9NQX4	ENSG00000128833	MYO5C	Supported		Cytosol;Nucleus						Cytosol (GO:0005829);Nucleus (GO:0005634)	Supported
Q9NS73	ENSG00000151332	MBIP	Supported		Cytosol;Nucleoli;Nucleus						Cytosol (GO:0005829);Nucleoli (GO:0005730);Nucleus (GO:0005634)	Supported
Q9NV56	ENSG00000101189	MRGBP	Supported		Nucleus						Nucleus (GO:0005634)	Supported
Q9NVU7	ENSG00000198301	SDAD1	Supported		Nucleoli	Nucleus					Nucleoli (GO:0005730);Nucleus (GO:0005634)	Supported
Q9NXR8	ENSG00000071243	ING3	Supported		Nucleus						Nucleus (GO:0005634)	Supported
Q9P0K7	ENSG00000039560	RAI14	Supported		Nucleus	Actin filaments	Cytosol				Actin filaments (GO:0015629);Cytosol (GO:0005829);Nucleus (GO:0005634)	Supported
Q9P2D1	ENSG00000171316	CHD7	Supported		Nucleoli;Nucleoplasm						Nucleoli (GO:0005730);Nucleoplasm (GO:0005654)	Supported
Q9UBL3	ENSG00000129691	ASH2L	Supported		Nucleoplasm;Plasma membrane			Nucleoplasm;Plasma membrane			Nucleoplasm (GO:0005654);Plasma membrane (GO:0005886)	Supported
Q9UBU8	ENSG00000185787	MORF4L1	Supported		Nuclear speckles						Nuclear speckles (GO:0016607)	Supported
Q9UEG4	ENSG00000102870	ZNF629	Supported		Nucleus	Golgi apparatus					Golgi apparatus (GO:0005794);Nucleus (GO:0005634)	Supported
Q9UGP4	ENSG00000144791	LIMD1	Supported		Focal adhesion sites;Nucleus						Focal adhesion sites (GO:0005925);Nucleus (GO:0005634)	Supported
Q9UGU0	ENSG00000100207	TCF20	Supported		Nuclear bodies;Nucleoplasm						Nuclear bodies (GO:0016604);Nucleoplasm (GO:0005654)	Supported
Q9UHF7	ENSG00000104447	TRPS1	Supported		Nucleoplasm			Nucleoplasm			Nucleoplasm (GO:0005654)	Supported
Q9UI36	ENSG00000276644	DACH1	Supported		Nucleoplasm	Vesicles					Nucleoplasm (GO:0005654);Vesicles (GO:0043231)	Supported
Q9UIG0	ENSG00000009954	BAZ1B	Supported		Nuclear bodies						Nuclear bodies (GO:0016604)	Supported
Q9UIV1	ENSG00000198791	CNOT7	Supported		Nuclear bodies						Nuclear bodies (GO:0016604)	Supported
Q9UKD2	ENSG00000053372	MRTO4	Approved		Nucleoli	Nuclear membrane;Nucleus		Nucleoli;Nucleus			Nuclear membrane (GO:0031965);Nucleoli (GO:0005730);Nucleus (GO:0005634)	Supported
Q9UKV8	ENSG00000123908	AGO2	Supported		Nucleoplasm	Cell Junctions					Cell Junctions (GO:0030054);Nucleoplasm (GO:0005654)	Supported
Q9UKW6	ENSG00000135374	ELF5	Supported		Nucleoplasm						Nucleoplasm (GO:0005654)	Supported
Q9UKZ1	ENSG00000158435	CNOT11	Supported		Nucleoplasm						Nucleoplasm (GO:0005654)	Supported
Q9ULX6	ENSG00000011243	AKAP8L	Supported		Nuclear speckles						Nuclear speckles (GO:0016607)	Supported
Q9UMX1	ENSG00000107882	SUFU	Supported		Nucleus						Nucleus (GO:0005634)	Supported
Q9UNX3	ENSG00000037241	RPL26L1	Supported		Cytosol;Endoplasmic reticulum;Nucleoli						Cytosol (GO:0005829);Endoplasmic reticulum (GO:0005783);Nucleoli (GO:0005730)	Supported
Q9UPP1	ENSG00000172943	PHF8	Supported		Nucleus						Nucleus (GO:0005634)	Supported
Q9UPT9	ENSG00000124422	USP22	Supported		Nuclear speckles						Nuclear speckles (GO:0016607)	Supported
Q9UPW6	ENSG00000119042	SATB2	Supported		Nucleoplasm						Nucleoplasm (GO:0005654)	Supported
Q9UQ88	ENSG00000008128	CDK11A	Supported		Cytosol;Nuclear speckles						Cytosol (GO:0005829);Nuclear speckles (GO:0016607)	Supported
Q9UQE7	ENSG00000108055	SMC3	Supported		Nucleoplasm						Nucleoplasm (GO:0005654)	Supported
Q9UQL6	ENSG00000108840	HDAC5	Supported		Cytosol;Nuclear speckles	Golgi apparatus					Cytosol (GO:0005829);Golgi apparatus (GO:0005794);Nuclear speckles (GO:0016607)	Supported
Q9UQR1	ENSG00000163848	ZNF148	Supported		Nucleus		Golgi apparatus				Golgi apparatus (GO:0005794);Nucleus (GO:0005634)	Supported
Q9Y221	ENSG00000132603	NIP7	Supported		Nucleoli;Nucleus						Nucleoli (GO:0005730);Nucleus (GO:0005634)	Supported
Q9Y230	ENSG00000183207	RUVBL2	Supported		Cytosol;Nucleoplasm	Centrosome					Centrosome (GO:0005813);Cytosol (GO:0005829);Nucleoplasm (GO:0005654)	Supported
Q9Y2K1	ENSG00000126804	ZBTB1	Supported		Nuclear membrane;Nucleoplasm						Nuclear membrane (GO:0031965);Nucleoplasm (GO:0005654)	Supported
Q9Y2K5	ENSG00000179912	R3HDM2	Supported		Nucleoplasm						Nucleoplasm (GO:0005654)	Supported
Q9Y2R4	ENSG00000278053	DDX52	Supported		Nucleoli	Nucleus					Nucleoli (GO:0005730);Nucleus (GO:0005634)	Supported
Q9Y3D9	ENSG00000181610	MRPS23	Supported		Mitochondria;Nuclear membrane				Mitochondria;Nuclear membrane		Mitochondria (GO:0005739);Nuclear membrane (GO:0031965)	Supported
Q9Y4A5	ENSG00000196367	TRRAP	Supported		Nucleoplasm	Golgi apparatus					Golgi apparatus (GO:0005794);Nucleoplasm (GO:0005654)	Supported
Q9Y4B4	ENSG00000164080	RAD54L2	Supported		Nucleus	Cytosol					Cytosol (GO:0005829);Nucleus (GO:0005634)	Supported
Q9Y4W2	ENSG00000001497	LAS1L	Approved		Nucleoplasm	Cytosol;Microtubule organizing center					Cytosol (GO:0005829);Microtubule organizing center (GO:0005815);Nucleoplasm (GO:0005654)	Supported
Q9Y5Q9	ENSG00000119041	GTF3C3	Supported		Nucleus	Nuclear membrane					Nuclear membrane (GO:0031965);Nucleus (GO:0005634)	Supported
Q9Y5Z7	ENSG00000111727	HCFC2	Supported		Nucleoplasm	Cytosol;Plasma membrane					Cytosol (GO:0005829);Nucleoplasm (GO:0005654);Plasma membrane (GO:0005886)	Supported
Q9Y618	ENSG00000196498	NCOR2	Supported		Nucleoplasm						Nucleoplasm (GO:0005654)	Supported
Q9Y6J9	ENSG00000162227	TAF6L	Supported		Nucleoplasm						Nucleoplasm (GO:0005654)	Supported
Q9Y6Q9	ENSG00000124151	NCOA3	Supported		Cytosol;Nucleoplasm						Cytosol (GO:0005829);Nucleoplasm (GO:0005654)	Supported
Q9Y6X9	ENSG00000133422	MORC2	Supported		Cytosol;Nucleus						Cytosol (GO:0005829);Nucleus (GO:0005634)	Supported
A7KAX9	ENSG00000134909	ARHGAP32	Approved		Golgi apparatus		Nucleoli fibrillar center;Nucleoplasm				Golgi apparatus (GO:0005794);Nucleoli fibrillar center (GO:0001650);Nucleoplasm (GO:0005654)	Uncertain
O15145	ENSG00000111229	ARPC3	Uncertain				Nucleoplasm				Nucleoplasm (GO:0005654)	Uncertain
P55081	ENSG00000140259	MFAP1	Uncertain				Cytosol;Nucleoplasm;Plasma membrane	Nucleoplasm			Cytosol (GO:0005829);Nucleoplasm (GO:0005654);Plasma membrane (GO:0005886)	Uncertain
P58317	ENSG00000197961	ZNF121	Uncertain				Centrosome;Nucleoli;Nucleoplasm				Centrosome (GO:0005813);Nucleoli (GO:0005730);Nucleoplasm (GO:0005654)	Uncertain
Q12951	ENSG00000168269	FOXI1	Uncertain				Nucleoli;Vesicles				Nucleoli (GO:0005730);Vesicles (GO:0043231)	Uncertain
Q8IXM2	ENSG00000258315	C17orf49	Uncertain				Cytosol;Nucleoplasm				Cytosol (GO:0005829);Nucleoplasm (GO:0005654)	Uncertain
Q8N3R9	ENSG00000072415	MPP5	Uncertain			Cytosol;Plasma membrane	Nucleoplasm				Cytosol (GO:0005829);Nucleoplasm (GO:0005654);Plasma membrane (GO:0005886)	Uncertain
Q8N6T3	ENSG00000101199	ARFGAP1	Supported		Golgi apparatus;Vesicles		Nuclear membrane				Golgi apparatus (GO:0005794);Nuclear membrane (GO:0031965);Vesicles (GO:0043231)	Uncertain
Q8NDV7	ENSG00000090905	TNRC6A	Approved		Vesicles	Golgi apparatus	Nucleoplasm				Golgi apparatus (GO:0005794);Nucleoplasm (GO:0005654);Vesicles (GO:0043231)	Uncertain
Q8NHM5	ENSG00000089094	KDM2B	Uncertain				Nucleoplasm				Nucleoplasm (GO:0005654)	Uncertain
Q92665	ENSG00000102738	MRPS31	Supported		Mitochondria		Nucleoli				Mitochondria (GO:0005739);Nucleoli (GO:0005730)	Uncertain
Q96FJ2	ENSG00000264364	DYNLL2	Uncertain				Cytosol;Nuclear bodies;Nucleoplasm				Cytosol (GO:0005829);Nuclear bodies (GO:0016604);Nucleoplasm (GO:0005654)	Uncertain
Q9UPM6	ENSG00000106852	LHX6	Uncertain				Nucleoli fibrillar center;Plasma membrane				Nucleoli fibrillar center (GO:0001650);Plasma membrane (GO:0005886)	Uncertain
Q9Y4J8	ENSG00000134769	DTNA	Approved		Cell Junctions	Intermediate filaments	Nucleoplasm				Cell Junctions (GO:0030054);Intermediate filaments (GO:0045111);Nucleoplasm (GO:0005654)	Uncertain
A5YKK6	ENSG00000125107	CNOT1	Supported		Cytosol						Cytosol (GO:0005829)
C9JLW8	ENSG00000225663	MCRIP1	Approved			Cytosol					Cytosol (GO:0005829)
L0R819	ENSG00000138381	ASNSD1	Approved			Cytosol					Cytosol (GO:0005829)
O00425	ENSG00000136231	IGF2BP3	Enhanced	Cytosol							Cytosol (GO:0005829)
O14579	ENSG00000105669	COPE	Enhanced	Golgi apparatus							Golgi apparatus (GO:0005794)
O14964	ENSG00000185359	HGS	Enhanced	Endosomes	Cytosol;Lysosomes						Cytosol (GO:0005829);Endosomes (GO:0005768);Lysosomes (GO:0005764)
O15027	ENSG00000148396	SEC16A	Supported		Endoplasmic reticulum;Golgi apparatus						Endoplasmic reticulum (GO:0005783);Golgi apparatus (GO:0005794)
O15372	ENSG00000147677	EIF3H	Approved			Cytosol					Cytosol (GO:0005829)
O43617	ENSG00000054116	TRAPPC3	Approved		Golgi apparatus	Cytosol					Cytosol (GO:0005829);Golgi apparatus (GO:0005794)
O43795	ENSG00000128641	MYO1B	Enhanced	Plasma membrane							Plasma membrane (GO:0005886)
O60271	ENSG00000008294	SPAG9	Enhanced	Cytosol;Microtubule organizing center							Cytosol (GO:0005829);Microtubule organizing center (GO:0005815)
O75083	ENSG00000071127	WDR1	Supported		Cell Junctions;Plasma membrane						Cell Junctions (GO:0030054);Plasma membrane (GO:0005886)
O75175	ENSG00000088038	CNOT3	Approved			Cytosol					Cytosol (GO:0005829)
O75420	ENSG00000146830	GIGYF1	Approved			Microtubules;Vesicles					Microtubules (GO:0015630);Vesicles (GO:0043231)
O75665	ENSG00000046651	OFD1	Supported		Microtubules						Microtubules (GO:0015630)
O75925	ENSG00000033800	PIAS1	Approved			Microtubules					Microtubules (GO:0015630)
O94832	ENSG00000176658	MYO1D	Approved			Cytosol					Cytosol (GO:0005829)
O94986	ENSG00000103995	CEP152	Supported		Centrosome						Centrosome (GO:0005813)
O95425	ENSG00000197321	SVIL	Supported		Actin filaments;Cytosol;Plasma membrane						Actin filaments (GO:0015629);Cytosol (GO:0005829);Plasma membrane (GO:0005886)
O95757	ENSG00000164070	HSPA4L	Approved			Centrosome;Cytosol					Centrosome (GO:0005813);Cytosol (GO:0005829)
O95793	ENSG00000124214	STAU1	Supported		Cytosol						Cytosol (GO:0005829)
P02533	ENSG00000186847	KRT14	Enhanced	Intermediate filaments				Intermediate filaments			Intermediate filaments (GO:0045111)
P02768	ENSG00000163631	ALB	Enhanced	Endoplasmic reticulum;Golgi apparatus							Endoplasmic reticulum (GO:0005783);Golgi apparatus (GO:0005794)
P04406	ENSG00000111640	GAPDH	Enhanced	Cytosol;Plasma membrane				Cytosol;Plasma membrane			Cytosol (GO:0005829);Plasma membrane (GO:0005886)
P04843	ENSG00000163902	RPN1	Enhanced	Endoplasmic reticulum							Endoplasmic reticulum (GO:0005783)
P05109	ENSG00000143546	S100A8	Supported		Intermediate filaments						Intermediate filaments (GO:0045111)
P05141	ENSG00000005022	SLC25A5	Supported		Mitochondria						Mitochondria (GO:0005739)
P05386	ENSG00000137818	RPLP1	Enhanced	Cytosol;Endoplasmic reticulum							Cytosol (GO:0005829);Endoplasmic reticulum (GO:0005783)
P06576	ENSG00000110955	ATP5B	Enhanced	Mitochondria							Mitochondria (GO:0005739)
P06753	ENSG00000143549	TPM3	Approved			Actin filaments;Cytosol					Actin filaments (GO:0015629);Cytosol (GO:0005829)
P07195	ENSG00000111716	LDHB	Enhanced	Cytosol				Cytosol			Cytosol (GO:0005829)
P07437	ENSG00000196230	TUBB	Supported		Microtubules						Microtubules (GO:0015630)
P09493	ENSG00000140416	TPM1	Approved			Actin filaments;Cytosol					Actin filaments (GO:0015629);Cytosol (GO:0005829)
P0CG40	ENSG00000217236	SP9	Approved			Mitochondria					Mitochondria (GO:0005739)
P10809	ENSG00000144381	HSPD1	Enhanced	Mitochondria				Mitochondria			Mitochondria (GO:0005739)
P11182	ENSG00000137992	DBT	Supported		Mitochondria						Mitochondria (GO:0005739)
P12236	ENSG00000169100	SLC25A6	Supported		Mitochondria						Mitochondria (GO:0005739)
P12277	ENSG00000166165	CKB	Supported		Cytosol			Cytosol			Cytosol (GO:0005829)
P13073	ENSG00000131143	COX4I1	Supported		Mitochondria						Mitochondria (GO:0005739)
P13647	ENSG00000186081	KRT5	Supported		Intermediate filaments						Intermediate filaments (GO:0045111)
P13667	ENSG00000155660	PDIA4	Supported		Endoplasmic reticulum						Endoplasmic reticulum (GO:0005783)
P14625	ENSG00000166598	HSP90B1	Enhanced	Endoplasmic reticulum							Endoplasmic reticulum (GO:0005783)
P14649	ENSG00000196465	MYL6B	Approved			Vesicles					Vesicles (GO:0043231)
P21796	ENSG00000213585	VDAC1	Approved			Cytosol					Cytosol (GO:0005829)
P22061	ENSG00000120265	PCMT1	Supported		Cytosol			Cytosol			Cytosol (GO:0005829)
P24539	ENSG00000116459	ATP5F1	Supported		Mitochondria						Mitochondria (GO:0005739)
P25705	ENSG00000152234	ATP5A1	Supported		Mitochondria			Mitochondria			Mitochondria (GO:0005739)
P25963	ENSG00000100906	NFKBIA	Enhanced	Cytosol							Cytosol (GO:0005829)
P26038	ENSG00000147065	MSN	Enhanced	Plasma membrane							Plasma membrane (GO:0005886)
P27824	ENSG00000127022	CANX	Enhanced	Endoplasmic reticulum							Endoplasmic reticulum (GO:0005783)
P28288	ENSG00000117528	ABCD3	Enhanced	Peroxisomes							Peroxisomes (GO:0005777)
P28799	ENSG00000030582	GRN	Enhanced	Endoplasmic reticulum;Endosomes;Lysosomes							Endoplasmic reticulum (GO:0005783);Endosomes (GO:0005768);Lysosomes (GO:0005764)
P29558	ENSG00000153250	RBMS1	Supported		Cytosol						Cytosol (GO:0005829)
P30101	ENSG00000167004	PDIA3	Enhanced	Endoplasmic reticulum							Endoplasmic reticulum (GO:0005783)
P30153	ENSG00000105568	PPP2R1A	Approved			Cytosol					Cytosol (GO:0005829)
P35232	ENSG00000167085	PHB	Supported		Mitochondria;Vesicles						Mitochondria (GO:0005739);Vesicles (GO:0043231)
P35579	ENSG00000100345	MYH9	Supported		Actin filaments;Cytosol;Plasma membrane				Actin filaments;Cytosol;Plasma membrane		Actin filaments (GO:0015629);Cytosol (GO:0005829);Plasma membrane (GO:0005886)
P35580	ENSG00000133026	MYH10	Enhanced	Actin filaments;Cytosol;Mitochondria				Actin filaments;Mitochondria			Actin filaments (GO:0015629);Cytosol (GO:0005829);Mitochondria (GO:0005739)
P35606	ENSG00000184432	COPB2	Approved			Cytosol					Cytosol (GO:0005829)
P35613	ENSG00000172270	BSG	Approved			Vesicles					Vesicles (GO:0043231)
P35908	ENSG00000172867	KRT2	Approved			Cytosol;Golgi apparatus;Intermediate filaments					Cytosol (GO:0005829);Golgi apparatus (GO:0005794);Intermediate filaments (GO:0045111)
P40939	ENSG00000084754	HADHA	Enhanced	Mitochondria							Mitochondria (GO:0005739)
P46779	ENSG00000108107	RPL28	Supported		Cytosol;Endoplasmic reticulum						Cytosol (GO:0005829);Endoplasmic reticulum (GO:0005783)
P49411	ENSG00000178952	TUFM	Enhanced	Mitochondria							Mitochondria (GO:0005739)
P50454	ENSG00000149257	SERPINH1	Enhanced	Endoplasmic reticulum							Endoplasmic reticulum (GO:0005783)
P51572	ENSG00000185825	BCAP31	Enhanced	Endoplasmic reticulum							Endoplasmic reticulum (GO:0005783)
P51970	ENSG00000119421	NDUFA8	Enhanced	Mitochondria							Mitochondria (GO:0005739)
P52630	ENSG00000170581	STAT2	Supported		Cytosol;Plasma membrane						Cytosol (GO:0005829);Plasma membrane (GO:0005886)
P53618	ENSG00000129083	COPB1	Enhanced	Cytosol;Golgi apparatus;Vesicles							Cytosol (GO:0005829);Golgi apparatus (GO:0005794);Vesicles (GO:0043231)
P55209	ENSG00000187109	NAP1L1	Uncertain				Microtubules				Microtubules (GO:0015630)
P56545	ENSG00000175029	CTBP2	Approved			Cytosol					Cytosol (GO:0005829)
P61513	ENSG00000197756	RPL37A	Approved			Cytosol;Endoplasmic reticulum					Cytosol (GO:0005829);Endoplasmic reticulum (GO:0005783)
P61758	ENSG00000155959	VBP1	Supported		Cytosol;Vesicles						Cytosol (GO:0005829);Vesicles (GO:0043231)
P62072	ENSG00000134809	TIMM10	Enhanced	Mitochondria							Mitochondria (GO:0005739)
P62263	ENSG00000164587	RPS14	Enhanced	Cytosol;Endoplasmic reticulum							Cytosol (GO:0005829);Endoplasmic reticulum (GO:0005783)
P62269	ENSG00000231500	RPS18	Supported		Cytosol						Cytosol (GO:0005829)
P62316	ENSG00000125743	SNRPD2	Uncertain				Cytosol				Cytosol (GO:0005829)
P62753	ENSG00000137154	RPS6	Enhanced	Cytosol;Endoplasmic reticulum							Cytosol (GO:0005829);Endoplasmic reticulum (GO:0005783)
P62829	ENSG00000125691	RPL23	Supported		Cytosol						Cytosol (GO:0005829)
P62851	ENSG00000118181	RPS25	Approved			Cytosol;Endoplasmic reticulum					Cytosol (GO:0005829);Endoplasmic reticulum (GO:0005783)
P63151	ENSG00000221914	PPP2R2A	Approved			Cytosol					Cytosol (GO:0005829)
P63173	ENSG00000172809	RPL38	Supported		Cytosol;Endoplasmic reticulum						Cytosol (GO:0005829);Endoplasmic reticulum (GO:0005783)
P63279	ENSG00000103275	UBE2I	Enhanced	Cytosol							Cytosol (GO:0005829)
P67936	ENSG00000167460	TPM4	Approved			Actin filaments;Cytosol					Actin filaments (GO:0015629);Cytosol (GO:0005829)
P68371	ENSG00000188229	TUBB4B	Supported		Microtubules						Microtubules (GO:0015630)
P80723	ENSG00000176788	BASP1	Enhanced		Plasma membrane						Plasma membrane (GO:0005886)
P82650	ENSG00000175110	MRPS22	Supported		Mitochondria						Mitochondria (GO:0005739)
P82663	ENSG00000131368	MRPS25	Enhanced	Mitochondria							Mitochondria (GO:0005739)
P82664	ENSG00000048544	MRPS10	Approved			Actin filaments;Mitochondria					Actin filaments (GO:0015629);Mitochondria (GO:0005739)
P82673	ENSG00000061794	MRPS35	Approved			Cytosol;Mitochondria		Mitochondria			Cytosol (GO:0005829);Mitochondria (GO:0005739)
P82675	ENSG00000144029	MRPS5	Supported		Mitochondria			Mitochondria			Mitochondria (GO:0005739)
P82912	ENSG00000181991	MRPS11	Supported		Mitochondria						Mitochondria (GO:0005739)
P82914	ENSG00000116898	MRPS15	Supported		Mitochondria						Mitochondria (GO:0005739)
P82930	ENSG00000074071	MRPS34	Supported		Mitochondria						Mitochondria (GO:0005739)
P83881	ENSG00000241343	RPL36A	Supported		Cytosol;Endoplasmic reticulum	Plasma membrane					Cytosol (GO:0005829);Endoplasmic reticulum (GO:0005783);Plasma membrane (GO:0005886)
Q00059	ENSG00000108064	TFAM	Enhanced	Mitochondria							Mitochondria (GO:0005739)
Q00610	ENSG00000141367	CLTC	Enhanced	Vesicles	Mitotic spindle	Cytosol				Mitotic spindle (biological definition)	Cytosol (GO:0005829);Mitotic spindle (GO:0072686);Vesicles (GO:0043231)
Q00978	ENSG00000213928	IRF9	Supported		Cytosol						Cytosol (GO:0005829)
Q01082	ENSG00000115306	SPTBN1	Approved			Golgi apparatus					Golgi apparatus (GO:0005794)
Q01804	ENSG00000164164	OTUD4	Approved			Cytosol					Cytosol (GO:0005829)
Q02575	ENSG00000171786	NHLH1	Approved			Golgi apparatus					Golgi apparatus (GO:0005794)
Q04206	ENSG00000173039	RELA	Enhanced	Cytosol							Cytosol (GO:0005829)
Q04837	ENSG00000106028	SSBP1	Supported		Mitochondria						Mitochondria (GO:0005739)
Q13011	ENSG00000104823	ECH1	Supported		Mitochondria						Mitochondria (GO:0005739)
Q13162	ENSG00000123131	PRDX4	Supported		Cytosol;Endoplasmic reticulum						Cytosol (GO:0005829);Endoplasmic reticulum (GO:0005783)
Q13501	ENSG00000161011	SQSTM1	Enhanced	Cytosol;Vesicles				Cytosol			Cytosol (GO:0005829);Vesicles (GO:0043231)
Q13813	ENSG00000197694	SPTAN1	Approved		Microtubules		Vesicles				Microtubules (GO:0015630);Vesicles (GO:0043231)
Q14141	ENSG00000125354	2006-09-01	Approved			Cytosol					Cytosol (GO:0005829)
Q14653	ENSG00000126456	IRF3	Supported		Cytosol						Cytosol (GO:0005829)
Q14847	ENSG00000002834	LASP1	Supported		Cytosol;Plasma membrane	Focal adhesion sites					Cytosol (GO:0005829);Focal adhesion sites (GO:0005925);Plasma membrane (GO:0005886)
Q15046	ENSG00000065427	KARS	Supported		Cytosol						Cytosol (GO:0005829)
Q15084	ENSG00000143870	PDIA6	Supported		Endoplasmic reticulum	Cytosol					Cytosol (GO:0005829);Endoplasmic reticulum (GO:0005783)
Q15437	ENSG00000101310	SEC23B	Supported		Vesicles						Vesicles (GO:0043231)
Q15654	ENSG00000087077	TRIP6	Supported		Cytosol;Focal adhesion sites	Plasma membrane					Cytosol (GO:0005829);Focal adhesion sites (GO:0005925);Plasma membrane (GO:0005886)
Q15758	ENSG00000105281	SLC1A5	Enhanced	Plasma membrane							Plasma membrane (GO:0005886)
Q16543	ENSG00000105401	CDC37	Enhanced	Cytosol							Cytosol (GO:0005829)
Q16643	ENSG00000113758	DBN1	Supported		Actin filaments	Plasma membrane					Actin filaments (GO:0015629);Plasma membrane (GO:0005886)
Q4L180	ENSG00000168386	FILIP1L	Approved			Plasma membrane					Plasma membrane (GO:0005886)
Q5SVZ6	ENSG00000197056	ZMYM1	Approved			Microtubule organizing center					Microtubule organizing center (GO:0005815)
Q5T6F2	ENSG00000137073	UBAP2	Approved			Cytosol					Cytosol (GO:0005829)
Q5TC82	ENSG00000135870	RC3H1	Supported		Cytosol;Plasma membrane						Cytosol (GO:0005829);Plasma membrane (GO:0005886)
Q5VYV7	ENSG00000149346	SLX4IP	Approved			Cytosol					Cytosol (GO:0005829)
Q6MZP7	ENSG00000189308	LIN54	Approved			Cytosol					Cytosol (GO:0005829)
Q6NSI4	ENSG00000147231	CXorf57	Approved			Intermediate filaments		Intermediate filaments			Intermediate filaments (GO:0045111)
Q6WCQ1	ENSG00000133030	MPRIP	Supported		Actin filaments	Cytosol					Actin filaments (GO:0015629);Cytosol (GO:0005829)
Q6Y7W6	ENSG00000204120	GIGYF2	Enhanced	Cytosol							Cytosol (GO:0005829)
Q6ZRI6	ENSG00000167173	C15orf39	Enhanced	Cytosol							Cytosol (GO:0005829)
Q70EL1	ENSG00000166348	USP54	Approved			Mitochondria					Mitochondria (GO:0005739)
Q71RC2	ENSG00000161813	LARP4	Enhanced	Cytosol							Cytosol (GO:0005829)
Q71U36	ENSG00000167552	TUBA1A	Enhanced	Microtubules							Microtubules (GO:0015630)
Q7L2E3	ENSG00000132153	DHX30	Supported		Cytosol;Mitochondria						Cytosol (GO:0005829);Mitochondria (GO:0005739)
Q7Z2W4	ENSG00000105939	ZC3HAV1	Enhanced	Cytosol		Golgi apparatus					Cytosol (GO:0005829);Golgi apparatus (GO:0005794)
Q86TB9	ENSG00000166889	PATL1	Supported		Cytoplasmic bodies						Cytoplasmic bodies (GO:0036464)
Q8IZD4	ENSG00000151065	DCP1B	Supported		Cytosol	Vesicles					Cytosol (GO:0005829);Vesicles (GO:0043231)
Q8IZH2	ENSG00000114127	XRN1	Supported		Cytosol;Plasma membrane						Cytosol (GO:0005829);Plasma membrane (GO:0005886)
Q8N5W9	ENSG00000183688	RFLNB	Approved		Actin filaments	Cytosol;Plasma membrane					Actin filaments (GO:0015629);Cytosol (GO:0005829);Plasma membrane (GO:0005886)
Q8ND24	ENSG00000167257	RNF214	Approved			Cytosol;Golgi apparatus					Cytosol (GO:0005829);Golgi apparatus (GO:0005794)
Q8ND56	ENSG00000257103	LSM14A	Supported		Cytoplasmic bodies;Cytosol						Cytoplasmic bodies (GO:0036464);Cytosol (GO:0005829)
Q8NHQ8	ENSG00000123094	RASSF8	Approved			Cytosol;Mitochondria					Cytosol (GO:0005829);Mitochondria (GO:0005739)
Q8TB72	ENSG00000055917	PUM2	Enhanced	Cytosol							Cytosol (GO:0005829)
Q8TCU4	ENSG00000116127	ALMS1	Approved			Cytosol					Cytosol (GO:0005829)
Q8TEP8	ENSG00000101639	CEP192	Approved			Centrosome;Cytosol		Cytosol			Centrosome (GO:0005813);Cytosol (GO:0005829)
Q8TF46	ENSG00000166938	DIS3L	Approved			Centrosome;Cytosol;Plasma membrane					Centrosome (GO:0005813);Cytosol (GO:0005829);Plasma membrane (GO:0005886)
Q92540	ENSG00000116698	SMG7	Supported		Cytosol	Intermediate filaments					Cytosol (GO:0005829);Intermediate filaments (GO:0045111)
Q92615	ENSG00000107929	LARP4B	Enhanced	Cytosol							Cytosol (GO:0005829)
Q969Q0	ENSG00000165502	RPL36AL	Approved			Cytosol;Endoplasmic reticulum;Plasma membrane					Cytosol (GO:0005829);Endoplasmic reticulum (GO:0005783);Plasma membrane (GO:0005886)
Q96A47	ENSG00000159556	ISL2	Approved			Rods & Rings					Rods & Rings ()
Q96AG4	ENSG00000108829	LRRC59	Enhanced	Endoplasmic reticulum							Endoplasmic reticulum (GO:0005783)
Q96B97	ENSG00000147010	SH3KBP1	Supported		Cytosol						Cytosol (GO:0005829)
Q96CW1	ENSG00000161203	AP2M1	Supported		Plasma membrane						Plasma membrane (GO:0005886)
Q96EY7	ENSG00000132300	PTCD3	Enhanced	Mitochondria							Mitochondria (GO:0005739)
Q96F86	ENSG00000179151	EDC3	Supported		Cytoplasmic bodies						Cytoplasmic bodies (GO:0036464)
Q96RQ3	ENSG00000078070	MCCC1	Enhanced	Mitochondria							Mitochondria (GO:0005739)
Q99623	ENSG00000215021	PHB2	Enhanced	Mitochondria							Mitochondria (GO:0005739)
Q99700	ENSG00000204842	ATXN2	Enhanced	Cytosol							Cytosol (GO:0005829)
Q99707	ENSG00000116984	MTR	Supported		Cytosol						Cytosol (GO:0005829)
Q9BW19	ENSG00000237649	KIFC1	Approved			Centrosome					Centrosome (GO:0005813)
Q9BY89	ENSG00000197077	KIAA1671	Approved			Microtubules					Microtubules (GO:0015630)
Q9BYN8	ENSG00000125901	MRPS26	Enhanced	Mitochondria							Mitochondria (GO:0005739)
Q9C026	ENSG00000100505	TRIM9	Supported		Cytosol						Cytosol (GO:0005829)
Q9C0B0	ENSG00000132478	UNK	Supported		Cytoplasmic bodies;Cytosol						Cytoplasmic bodies (GO:0036464);Cytosol (GO:0005829)
Q9C0B7	ENSG00000103047	TANGO6	Approved			Cytosol;Golgi apparatus					Cytosol (GO:0005829);Golgi apparatus (GO:0005794)
Q9GZN1	ENSG00000075089	ACTR6	Approved			Cytosol;Plasma membrane		Cytosol;Plasma membrane		Cytosol (correlation);Plasma membrane (correlation)	Cytosol (GO:0005829);Plasma membrane (GO:0005886)
Q9H0N5	ENSG00000132570	PCBD2	Approved			Plasma membrane					Plasma membrane (GO:0005886)
Q9H3G5	ENSG00000106066	CPVL	Supported		Endoplasmic reticulum						Endoplasmic reticulum (GO:0005783)
Q9H582	ENSG00000122482	ZNF644	Uncertain				Vesicles				Vesicles (GO:0043231)
Q9H6D7	ENSG00000092036	HAUS4	Supported		Focal adhesion sites;Plasma membrane						Focal adhesion sites (GO:0005925);Plasma membrane (GO:0005886)
Q9H8E8	ENSG00000149474	KAT14	Approved			Vesicles					Vesicles (GO:0043231)
Q9HAV7	ENSG00000109519	GRPEL1	Supported		Mitochondria						Mitochondria (GO:0005739)
Q9HCC0	ENSG00000131844	MCCC2	Enhanced	Mitochondria							Mitochondria (GO:0005739)
Q9HCE1	ENSG00000155363	MOV10	Approved			Cytosol					Cytosol (GO:0005829)
Q9HCU9	ENSG00000174744	BRMS1	Approved			Centrosome					Centrosome (GO:0005813)
Q9HD33	ENSG00000136522	MRPL47	Enhanced	Mitochondria							Mitochondria (GO:0005739)
Q9NP62	ENSG00000137270	GCM1	Approved			Vesicles					Vesicles (GO:0043231)
Q9NPI6	ENSG00000272886	DCP1A	Supported		Cytoplasmic bodies						Cytoplasmic bodies (GO:0036464)
Q9NRA8	ENSG00000184708	EIF4ENIF1	Enhanced	Vesicles							Vesicles (GO:0043231)
Q9NYL9	ENSG00000138594	TMOD3	Approved			Actin filaments;Cytosol					Actin filaments (GO:0015629);Cytosol (GO:0005829)
Q9NZI8	ENSG00000159217	IGF2BP1	Supported		Cytosol						Cytosol (GO:0005829)
Q9NZT1	ENSG00000178372	CALML5	Approved			Cytosol;Plasma membrane					Cytosol (GO:0005829);Plasma membrane (GO:0005886)
Q9UHB6	ENSG00000050405	LIMA1	Enhanced	Actin filaments;Cytosol;Focal adhesion sites;Plasma membrane							Actin filaments (GO:0015629);Cytosol (GO:0005829);Focal adhesion sites (GO:0005925);Plasma membrane (GO:0005886)
Q9UHB9	ENSG00000167881	SRP68	Enhanced	Cytosol;Focal adhesion sites							Cytosol (GO:0005829);Focal adhesion sites (GO:0005925)
Q9UKT9	ENSG00000161405	IKZF3	Uncertain				Cytosol;Plasma membrane				Cytosol (GO:0005829);Plasma membrane (GO:0005886)
Q9ULL5	ENSG00000126464	PRR12	Approved			Cytosol					Cytosol (GO:0005829)
Q9UPN4	ENSG00000141577	CEP131	Supported		Cytokinetic bridge;Microtubule organizing center;Microtubules			Cytokinetic bridge		Cytokinetic bridge (biological definition)	Cytokinetic bridge (GO:0045171);Microtubule organizing center (GO:0005815);Microtubules (GO:0015630)
Q9UPN7	ENSG00000105063	PPP6R1	Enhanced	Cytosol				Cytosol			Cytosol (GO:0005829)
Q9UPR3	ENSG00000198952	SMG5	Uncertain				Cytoplasmic bodies	Cytoplasmic bodies			Cytoplasmic bodies (GO:0036464)
Q9Y2G7	ENSG00000120784	ZFP30	Approved			Cytosol					Cytosol (GO:0005829)
Q9Y2Q9	ENSG00000147586	MRPS28	Enhanced	Mitochondria							Mitochondria (GO:0005739)
Q9Y2R9	ENSG00000125445	MRPS7	Approved			Mitochondria		Mitochondria			Mitochondria (GO:0005739)
Q9Y399	ENSG00000122140	MRPS2	Supported		Mitochondria						Mitochondria (GO:0005739)
Q9Y3B7	ENSG00000174547	MRPL11	Supported		Mitochondria						Mitochondria (GO:0005739)
Q9Y3D3	ENSG00000182180	MRPS16	Supported		Mitochondria	Cytosol					Cytosol (GO:0005829);Mitochondria (GO:0005739)
Q9Y4F3	ENSG00000166783	KIAA0430	Supported		Golgi apparatus;Vesicles						Golgi apparatus (GO:0005794);Vesicles (GO:0043231)
Q9Y4I1	ENSG00000197535	MYO5A	Approved			Focal adhesion sites;Microtubule organizing center					Focal adhesion sites (GO:0005925);Microtubule organizing center (GO:0005815)
Q9Y520	ENSG00000117523	PRRC2C	Enhanced	Cytosol							Cytosol (GO:0005829)
Q9Y5A6	ENSG00000166529	ZSCAN21	Approved			Endoplasmic reticulum					Endoplasmic reticulum (GO:0005783)
Q9Y5A9	ENSG00000198492	YTHDF2	Enhanced	Cytosol	Cytoplasmic bodies						Cytoplasmic bodies (GO:0036464);Cytosol (GO:0005829)
Q9Y5J7	ENSG00000100575	TIMM9	Enhanced	Mitochondria							Mitochondria (GO:0005739)
Q9Y5P3	ENSG00000131831	RAI2	Approved			Plasma membrane					Plasma membrane (GO:0005886)
Q9Y5V3	ENSG00000179222	MAGED1	Approved			Cytosol					Cytosol (GO:0005829)
Q9Y676	ENSG00000204568	MRPS18B	Supported		Mitochondria	Cell Junctions					Cell Junctions (GO:0030054);Mitochondria (GO:0005739)
Q9Y6K9	ENSG00000269335	IKBKG	Enhanced	Cytosol							Cytosol (GO:0005829)
Q9Y6M1	ENSG00000073792	IGF2BP2	Enhanced	Cytosol							Cytosol (GO:0005829)
