# Supplementary material for: Human transcription factor protein interaction networks
Source: Research Square preprint supplement (doi:10.21203/rs.3.rs-228624/v1), 2021-02-23
Supplement: Supplementary file 5 [file d2d3b279a91c23b2e7d05d88.xlsx]

## Sheet: Sheet1
Protein description	Gene name	Gene name synonyms	UniProt ID	Interacting TFs
TFIID complex (Corum complex 484)
TATA-box-binding protein	TBP	GTF2D1 TF2D TFIID	P20226	ELF1,ELF2
Transcription initiation factor TFIID subunit 1	TAF1	BA2R CCG1 CCGS TAF2A	P21675	ELF1,ELK3,FEV,KLF16,MYC,TYY1
Transcription initiation factor TFIID subunit 10	TAF10	TAF2A TAF2H TAFII30	Q12962	MYC
Transcription initiation factor TFIID subunit 11	TAF11	TAF2I	Q15544
Transcription initiation factor TFIID subunit 12	TAF12	TAF15 TAF2J TAFII20	Q16514	ELF1,ELF2,ELF4,KLF15,KLF6,KLF8,LHX2,MYC,MYOD1,NFIX
Transcription initiation factor TFIID subunit 13	TAF13	TAF2K TAFII18	Q15543
Transcription initiation factor TFIID subunit 4	TAF4	TAF2C TAF2C1 TAF4A TAFII130 TAFII135	O00268	ELF1,ELF4,ELK3,ETV3,FEV,HNF4a,KLF15,KLF16,KLF8,NFIX,NFYC,TYY1
Transcription initiation factor TFIID subunit 5	TAF5	TAF2D	Q15542	ELF1,ELF2,ELF4,ELK3,FEV,HNF4a,KLF15,KLF16,KLF8,NFIX,NFYC,TYY1
Transcription initiation factor TFIID subunit 6	TAF6	TAF2E TAFII70	P49848	ELF1,ELF2,ELF4,ELK3,ETS1,FEV,HEN1,HME1,HNF4a,KLF12,KLF15,KLF16,KLF8,MYOD1,NFIX,NFYC,PAX6,TYY1
Transcription initiation factor TFIID subunit 7	TAF7	TAF2F TAFII55	Q15545
Transcription initiation factor TFIID subunit 9	TAF9	TAF2G TAFII31	Q16594	FEV,HME1,HNF4a,KLF3,KLF6,KLF8,MYB,MYC,SP7,TYY1
SAGA complex, GCN5-linked (Corum complex 6643)
Adenosine deaminase	ADA	ADA1	P00813
Ataxin-7-like protein 1	ATXN7L1	ATXN7L4,KIAA1218	Q9ULK2	KLF6,MYC
Ataxin-7-like protein 2	ATXN7L2		Q5T6C5	KLF6,MYC
Ataxin-7-like protein 3	ATXN7L3		Q14CW9	KLF6,MYC
Histone acetyltransferase KAT2A	KAT2A	GCN5, GCN5L2, HGCN5	Q92830	E2F1,ELF1,ELF4,HNF4a,KLF12,KLF3,KLF8,LHX4,MYC,MYOD1,NFIX,PPARG,SP7,TYY1
SAGA-associated factor 29	SGF29	CCDC101	Q96ES7	E2F1,ELF1,ELF4,HNF4a,KLF3,KLF6,MYC,MYOD1,TYY1
STAGA complex 65 subunit gamma	SUPT7L	KIAA0764, STAF65gamma	O94864	ELF4,KLF6,MYC
TAF5-like RNA polymerase II p300/CBP-associated factor-associated factor 65 kDa subunit 5L	TAF5L	PAF65B	O75529	ELF4,HNF4a,KLF6,KLF8,MYC,MYOD1,SOX4
TAF6-like RNA polymerase II p300/CBP-associated factor-associated factor 65 kDa subunit 6L	TAF6L	PAF65A	Q9Y6J9	KLF6,MYC
Transcription factor SPT20 homolog	SUPT20H	C13orf19,FAM48A,FP757	Q8NEM7	ELF4,ELK3,FEV,KLF6,KLF8,LHX1,MYC,SOX4
Transcription initiation factor TFIID subunit 10	TAF10	TAF2A TAF2H TAFII30	Q12962	MYC
Transcription initiation factor TFIID subunit 12	TAF12	TAF15 TAF2J TAFII20	Q16514	ELF1,ELF2,ELF4,KLF15,KLF6,KLF8,LHX2,MYC,MYOD1,NFIX
Transcription initiation factor TFIID subunit 9	TAF9	TAF2G TAFII31	Q16594	FEV,HME1,HNF4a,KLF3,KLF6,KLF8,MYB,MYC,SP7,TYY1
Transcription initiation factor TFIID subunit 9B	TAF9B	TAF9L	Q9HBM6	FEV,HNF4a,KLF3,KLF6,KLF8,MYC,TYY1
Transcription initiation protein SPT3 homolog	SUPT3H	SPT3	O75486	KLF6,MYC
Transcriptional adapter 2-beta	TADA2B	ADA2B	Q86TJ2	HNF4a,KLF6,KLF8,MYC,MYOD1,SOX4
Transcriptional adapter 3	TADA3	ADA3, TADA3L	O75528	E2F1,KLF12,KLF3,KLF6,KLF8,MYC,PPARG,TYY1
Transformation/transcription domain-associated protein	TRRAP	PAF400	Q9Y4A5	ELF1,ELF2,ELF4,HNF1B,HNF4a,KLF12,LHX4,MYC,MYOD1,NFIX,SOX9,TYY1
Ubiquitin carboxyl-terminal hydrolase 22	USP22	KIAA1063,USP3L	Q9UPT9	KLF6,MYC
TFIIA complex (Corum complex 489)
Transcription initiation factor IIA subunit 1	GTF2A1	TF2A1	P52655
Transcription initiation factor IIA subunit 2	GTF2A2	TF2A2	P52657
TFIIB
Transcription initiation factor IIB	GTF2B	TF2B, TFIIB	Q00403
TFIIF complex (Corum complex 153)
General transcription factor IIF subunit 1	GTF2F1	RAP74	P35269
General transcription factor IIF subunit 2	GTF2F2	RAP30	P13984
TFIIE complex (Corum complex 152)
General transcription factor IIE subunit 1	GTF2E1	TF2E1	P29083
Transcription initiation factor IIE subunit beta	GTF2E2	TF2E2	P29084
TFIIH transcription factor complex (Corum complex 1009)
CDK-activating kinase assembly factor MAT1	MNAT1	CAP35, MAT1, RNF66	P51948
Cyclin-dependent kinase 7	CDK7	CAK, CAK1, CDKN7, MO15, STK1	P50613
Cyclin-H	CCNH		P51946
General transcription factor IIH subunit 1	GTF2H1	BTF2	P32780
General transcription factor IIH subunit 2	GTF2H2	BTF2P44	Q13888
General transcription factor IIH subunit 3	GTF2H3		Q13889
General transcription factor IIH subunit 4	GTF2H4		Q92759
General transcription factor IIH subunit 5	GTF2H5	C6orf175 TTDA	Q6ZYL4
TFIIH basal transcription factor complex helicase XPB subunit	ERCC3	XPB, XPBC	P19447
TFIIH basal transcription factor complex helicase XPD subunit	ERCC2	XPD, XPDC	P18074
Mediator complex (Corum complex 230)
Cyclin-C	CCNC	SRB11	P24863
Cyclin-dependent kinase 19	CDK19	CDC2L6 CDK11 KIAA1028	Q9BWU1
Cyclin-dependent kinase 8	CDK8	SRB10, hSRB10	P49336
Mediator of RNA polymerase II transcription subunit 1	MED1	ARC205, CRSP1, CRSP200, DRIP205, DRIP230, PBP, PPARBP, PPARGBP, RB18A, TRAP220, TRIP2	Q15648
Mediator of RNA polymerase II transcription subunit 10	MED10	NUT2, TRG20, L6, TRG17	Q9BTT4	MYC
Mediator of RNA polymerase II transcription subunit 11	MED11		Q9P086
Mediator of RNA polymerase II transcription subunit 12	MED12	TRAP230, ARC240, CAGH45, HOPA, KIAA0192, TNRC11	Q93074
Mediator of RNA polymerase II transcription subunit 13	MED13	TRAP240, ARC250, KIAA0593, THRAP1	Q9UHV7
Mediator of RNA polymerase II transcription subunit 13-like	MED13L	KIAA1025 PROSIT240 THRAP2 TRAP240L	Q71F56
Mediator of RNA polymerase II transcription subunit 14	MED14	ARC150, CRSP2, CXorf4, DRIP150, EXLM1, RGR1, TRAP170	O60244
Mediator of RNA polymerase II transcription subunit 15	MED15	ARC105, CTG7A, PCQAP, TIG1, TNRC7	Q96RN5	KLF15,NFIA
Mediator of RNA polymerase II transcription subunit 16	MED16	DRIP92, THRAP5, TRAP95	Q9Y2X0
Mediator of RNA polymerase II transcription subunit 17	MED17	ARC77, CRSP6, DRIP77, DRIP80, TRAP80	Q9NVC6	MYC
Mediator of RNA polymerase II transcription subunit 18	MED18		Q9BUE0
Mediator of RNA polymerase II transcription subunit 19	MED19	LCMR1	A0JLT2
Mediator of RNA polymerase II transcription subunit 20	MED20	TRFP	Q9H944
Mediator of RNA polymerase II transcription subunit 21	MED21	SRB7, SURB7	Q13503
Mediator of RNA polymerase II transcription subunit 22	MED22	SURF5	Q15528
Mediator of RNA polymerase II transcription subunit 23	MED23	ARC130, CRSP3, DRIP130, KIAA1216, SUR2, hSUR2	Q9ULK4
Mediator of RNA polymerase II transcription subunit 24	MED24	ARC100, CRSP4, DRIP100, KIAA0130, THRAP4, TRAP100	O75448	MYC
Mediator of RNA polymerase II transcription subunit 25	MED25	ACID1, ARC92, PTOV2	Q71SY5
Mediator of RNA polymerase II transcription subunit 26	MED26	ARC70, CRSP7	O95402
Mediator of RNA polymerase II transcription subunit 27	MED27	CRSP34 CRSP8	Q6P2C8
Mediator of RNA polymerase II transcription subunit 28	MED28	EG1	Q9H204
Mediator of RNA polymerase II transcription subunit 29	MED29	IXL	Q9NX70
Mediator of RNA polymerase II transcription subunit 30	MED30	THRAP6 TRAP25	Q96HR3
Mediator of RNA polymerase II transcription subunit 31	MED31	SOH1	Q9Y3C7
Mediator of RNA polymerase II transcription subunit 4	MED4	ARC36 DRIP36 VDRIP	Q9NPJ6	HNF4a
Mediator of RNA polymerase II transcription subunit 6	MED6	ARC33	O75586
Mediator of RNA polymerase II transcription subunit 7	MED7	ARC34, CRSP9, CRSP33	O43513
Mediator of RNA polymerase II transcription subunit 8	MED8		Q96G25	BRAC,FOS,HNF4a,MYC,MYOD1
Mediator of RNA polymerase II transcription subunit 9	MED9	MED25	Q9NWA0
RNA polymerase II (RNAPII) (Corum complex 2685)
DNA-directed RNA polymerase II subunit RPB1	POLR2A	POLR2	P24928
DNA-directed RNA polymerase II subunit RPB11-a	POLR2J	POLR2J1	P52435
DNA-directed RNA polymerase II subunit RPB2	POLR2B		P30876
DNA-directed RNA polymerase II subunit RPB3	POLR2C		P19387
DNA-directed RNA polymerase II subunit RPB4	POLR2D		O15514
DNA-directed RNA polymerase II subunit RPB7	POLR2G	RPB7	P62487
DNA-directed RNA polymerase II subunit RPB9	POLR2I		P36954
DNA-directed RNA polymerases I, II, and III subunit RPABC1	POLR2E		P19388
DNA-directed RNA polymerases I, II, and III subunit RPABC2	POLR2F	POLRF	P61218
DNA-directed RNA polymerases I, II, and III subunit RPABC3	POLR2H		P52434
DNA-directed RNA polymerases I, II, and III subunit RPABC4	POLR2K		P53803
DNA-directed RNA polymerases I, II, and III subunit RPABC5	POLR2L		P62875
General transcription factor IIF subunit 1	GTF2F1	RAP74	P35269
General transcription factor IIF subunit 2	GTF2F2	RAP30	P13984
RNA polymerase II subunit A C-terminal domain phosphatase	CTDP1	FCP1	Q9Y5B0
RNA polymerase II-associated protein 1	RPAP1	KIAA1403	Q9BWH6
Transcription initiation factor IIB	GTF2B	TF2B TFIIB	Q00403
